# Supplementary material for: Ribosomal profiling during prion disease uncovers progressive translational derangement in glia but not in neurons
Source: eLife. 2020 Sep 22;9:e62911. doi: 10.7554/eLife.62911 (PMC7527237; doi:10.7554/eLife.62911)
Supplement: Supplementary file 7. — Table displaying Ensemble GeneID, MGI Symbol, the individual and average translation (rlog transformed RPF counts per gene) and difference analysis between prion disease (PrD) vs control (ctrl) samples through disease progression in GFAP+ cells, including mean of normalized RPFs per gene (baseMean), log2FC, pvalue and Benjamini-Hochberg adjusted p values (padj). Genes associated with an A1 or an A2 signature are indicated in the last column. [file elife-62911-supp7.xlsx]

## Sheet: SupplementaryTable7
GeneID	GFAP_2wpi_Ctrl_1	GFAP_2wpi_Ctrl_2	GFAP_2wpi_Ctrl_3	GFAP_2wpi_PrD_2	GFAP_2wpi_PrD_3	GFAP_4wpi_Ctrl_1	GFAP_4wpi_Ctrl_2	GFAP_4wpi_Ctrl_3	GFAP_4wpi_PrD_1	GFAP_4wpi_PrD_2	GFAP_4wpi_PrD_3	GFAP_8wpi_Ctrl_1	GFAP_8wpi_Ctrl_2	GFAP_8wpi_Ctrl_3	GFAP_8wpi_PrD_1	GFAP_8wpi_PrD_2	GFAP_8wpi_PrD_3	GFAP_16wpi_Ctrl_1	GFAP_16wpi_Ctrl_2	GFAP_16wpi_Ctrl_3	GFAP_16wpi_PrD_1	GFAP_16wpi_PrD_2	GFAP_16wpi_PrD_3	GFAP_24wpi_Ctrl_1	GFAP_24wpi_Ctrl_2	GFAP_24wpi_Ctrl_3	GFAP_24wpi_PrD_1	GFAP_24wpi_PrD_2	GFAP_24wpi_PrD_3	GFAP_term_Ctrl_1	GFAP_term_Ctrl_2	GFAP_term_Ctrl_3	GFAP_term_PrD_1	GFAP_term_PrD_2	GFAP_term_PrD_3	GFAP_2wpi_Ctrl	GFAP_2wpi_PrD	GFAP_4wpi_Ctrl	GFAP_4wpi_PrD	GFAP_8wpi_Ctrl	GFAP_8wpi_PrD	GFAP_16wpi_Ctrl	GFAP_16wpi_PrD	GFAP_24wpi_Ctrl	GFAP_24wpi_PrD	GFAP_term_Ctrl	GFAP_term_PrD	baseMean_GFAP_2wpi	log2FC_GFAP_2wpi
ENSMUSG00000000001	9.18067	9.10503	9.04121	9.33552	9.1008	9.19058	8.94722	9.04819	8.9468	8.81983	8.93594	9.23396	8.98796	9.26928	9.3274	9.08494	9.07166	9.35366	9.19897	9.0689	9.24179	8.81616	9.07519	8.47968	8.84725	8.74469	8.53065	8.83647	8.92139	8.64274	8.64229	8.74096	8.84524	8.73684	8.676	9.10897	9.21816	9.062	8.90086	9.16373	9.16133	9.20718	9.04438	8.69054	8.76284	8.67533	8.75269	572.985	0.200133
ENSMUSG00000000028	3.50133	3.47293	3.49476	3.50256	3.55292	3.57031	3.6129	3.5929	3.60489	3.65522	3.62487	3.75493	3.593	3.71746	3.6922	3.65272	3.65404	3.9563	4.06223	3.97929	3.90692	3.85219	3.89139	2.487	2.57399	2.40951	2.46976	2.49037	2.53562	2.95309	3.02413	2.90237	3.12397	2.96393	3.19201	3.48967	3.52774	3.59204	3.62832	3.68846	3.66632	3.99927	3.8835	2.49016	2.49858	2.95986	3.0933	11.2659	0.442581
ENSMUSG00000000049	NA	NA	NA	NA	NA	NA	NA	NA	NA	NA	NA	NA	NA	NA	NA	NA	NA	NA	NA	NA	NA	NA	NA	NA	NA	NA	NA	NA	NA	3.1709	3.17758	3.12132	3.36906	3.54117	3.38541	NA	NA	NA	NA	NA	NA	NA	NA	NA	NA	3.1566	3.43188	NA	NA
ENSMUSG00000000056	6.44082	6.44943	6.47778	6.53599	6.48469	6.48535	6.64148	6.67934	6.52148	6.62031	6.71906	7.01219	6.69312	7.07691	6.95751	6.80848	6.8277	6.95268	6.88165	6.7695	6.89303	6.56338	6.82461	6.57397	6.63935	6.52983	6.65898	6.50686	6.39742	6.81727	6.5638	6.56897	6.32252	6.08805	6.27594	6.45601	6.51034	6.60206	6.62028	6.92741	6.86456	6.86794	6.76034	6.58105	6.52109	6.65001	6.22884	89.2314	0.152393
ENSMUSG00000000058	8.61249	8.62238	8.82978	8.85447	8.76208	8.46188	8.6456	8.56027	8.61418	8.787	8.60688	8.82009	8.9968	9.11431	8.92384	8.93818	8.94375	8.93117	9.11967	8.95936	8.82627	9.05886	9.05291	8.30561	8.47931	8.57663	8.40204	9.17437	9.0304	8.64277	8.75633	8.91582	10.1208	10.1722	10.4868	8.68822	8.80827	8.55592	8.66936	8.97707	8.93526	9.0034	8.97935	8.45385	8.86894	8.77164	10.26	429.018	0.21141
ENSMUSG00000000078	6.76712	6.78823	6.84684	6.92427	6.77156	6.83291	6.76709	6.77119	6.81848	6.78529	6.74833	7.10341	7.18473	7.18919	7.18692	7.05736	7.16461	7.27154	7.29551	7.34135	7.30584	7.1554	7.25206	6.8946	7.02472	7.02529	7.08594	7.37431	7.12884	7.0035	7.00831	6.81962	7.87957	7.67431	7.74173	6.80073	6.84791	6.7904	6.78404	7.15911	7.1363	7.3028	7.23777	6.98154	7.19636	6.94381	7.7652	113.449	0.120743
ENSMUSG00000000085	5.26089	5.11039	5.20313	5.06945	5.16464	5.21936	5.38301	5.39041	5.33989	5.26436	5.38555	5.61913	5.54298	5.46721	5.59091	5.62188	5.67442	5.70922	5.49046	5.51865	5.62339	5.57079	5.61601	5.49619	5.48102	5.61157	5.4493	5.51478	5.3941	5.32678	5.79949	5.60043	6.03031	5.84444	5.89402	5.19147	5.11704	5.33093	5.32993	5.54311	5.62907	5.57278	5.6034	5.52959	5.45273	5.57557	5.92293	35.9306	-0.358244
ENSMUSG00000000088	10.3612	10.2809	10.2743	10.3465	10.1427	10.4309	10.2036	10.2458	10.4126	10.1515	10.2752	10.5409	10.3997	10.5321	10.4649	10.4338	10.4601	10.7116	10.5947	10.5581	10.57	10.5039	10.5443	10.2505	10.3689	10.3061	10.2613	10.3853	10.3277	10.3649	10.2299	10.3987	10.3446	10.1634	10.0469	10.3055	10.2446	10.2934	10.2798	10.4909	10.4529	10.6215	10.5394	10.3085	10.3248	10.3312	10.185	1248.69	-0.0964593
ENSMUSG00000000120	3.48249	3.57377	3.40797	3.36838	3.39785	3.43149	3.45647	3.41995	3.42575	3.54806	3.43906	3.94383	3.96895	3.87974	4.00584	4.01421	3.95218	3.79028	4.06975	4.12859	4.08456	4.09622	3.90409	4.07972	4.04277	3.87755	3.94041	3.78151	4.11861	3.75388	3.89955	3.92871	3.40182	3.66432	3.66262	3.48807	3.38311	3.43597	3.47096	3.93084	3.99074	3.99621	4.02829	4.00001	3.94684	3.86071	3.57625	11.2754	-1.41507
ENSMUSG00000000125	4.16441	4.1284	4.24808	4.13414	4.35194	4.18278	4.07385	4.24449	4.19187	4.32616	4.30282	4.45734	4.77955	4.63126	4.42426	4.49839	4.60532	4.58809	4.71692	4.97125	4.67864	5.14244	4.89572	3.97489	4.10846	3.91691	3.99887	3.83537	3.97032	4.14574	4.11653	4.49693	3.99114	4.09295	4.09753	4.1803	4.24304	4.16704	4.27361	4.62271	4.50933	4.75875	4.9056	4.00009	3.93485	4.25306	4.06054	18.3483	0.502999
ENSMUSG00000000126	NA	NA	NA	NA	NA	1.69673	1.70214	1.77451	1.77162	1.72017	1.74487	2.22426	2.16424	2.12407	2.0834	2.18312	2.15194	2.46757	2.52759	2.49393	2.46194	2.57297	2.48248	2.61476	2.51368	2.62583	2.55252	2.51071	2.56405	2.70786	2.80851	2.72105	2.96418	2.71725	2.71721	NA	NA	1.72446	1.74555	2.17086	2.13949	2.49637	2.5058	2.58476	2.54243	2.7458	2.79955	NA	NA
ENSMUSG00000000127	7.64095	7.58471	7.54592	7.73727	7.5692	7.66086	7.49469	7.6132	7.70836	7.63608	7.52081	7.8292	7.64739	7.81337	7.75001	7.68796	7.71285	8.08531	7.76703	7.74669	7.89411	7.57188	7.71381	7.67045	7.76025	7.73431	7.73942	7.86423	7.83718	7.35123	7.31868	7.63535	7.27066	7.25251	7.28587	7.59053	7.65324	7.58958	7.62175	7.76332	7.71694	7.86634	7.7266	7.72167	7.81361	7.43509	7.26968	197.016	0.136353
ENSMUSG00000000131	6.89259	6.74491	6.80454	6.90388	6.98616	7.19336	7.16557	7.0758	7.18834	7.12001	7.11066	7.4975	7.37808	7.20195	7.37252	7.48015	7.33884	7.35134	7.4075	7.48385	7.38636	7.46557	7.33357	7.37555	7.38955	7.26038	7.33309	7.49511	7.1341	7.39609	7.3483	7.41987	7.53602	7.50747	7.31865	6.81401	6.94502	7.14491	7.13967	7.35918	7.39717	7.41423	7.39517	7.34183	7.32077	7.38808	7.45405	117.114	0.332029
ENSMUSG00000000134	6.91367	7.06409	7.10841	6.97116	7.05337	6.8808	6.89438	6.82672	6.77487	6.9614	6.88675	7.15899	7.36207	7.1702	7.1383	7.20349	7.20967	7.17128	7.14794	7.23347	7.10308	7.29413	7.27189	6.5986	6.54268	6.57266	6.63475	6.69164	6.81691	6.87656	6.87614	7.04851	7.15846	7.02196	7.00984	7.02872	7.01227	6.8673	6.87434	7.23042	7.18382	7.18423	7.22303	6.57131	6.71443	6.93374	7.06342	130.335	-0.0442574
ENSMUSG00000000142	6.29969	6.31818	6.45228	6.35913	6.44109	6.51987	6.62271	6.48075	6.38969	6.37487	6.74354	6.62028	6.47983	6.73477	6.64867	6.57332	6.44392	6.34616	6.3151	6.15924	6.35939	6.07701	6.14752	5.74418	5.62187	5.63248	5.6	5.73059	5.79186	5.93722	5.86832	5.79016	5.68894	5.68943	5.6541	6.35672	6.40011	6.54111	6.5027	6.61163	6.55531	6.2735	6.19464	5.66618	5.70749	5.86523	5.67749	83.0148	0.125014
ENSMUSG00000000148	6.06944	6.11448	6.19391	6.0612	6.32251	5.84114	5.99201	6.03302	5.9808	6.06433	6.14925	6.16256	6.23119	6.19875	5.98313	6.13676	6.06768	5.56179	6.03804	5.76884	5.93795	5.83306	5.79416	5.21317	5.25912	5.1185	5.11791	5.25673	5.27792	5.72722	5.67521	5.64896	5.8118	5.73706	5.90476	6.12594	6.19186	5.95539	6.06479	6.1975	6.06253	5.78956	5.85506	5.19693	5.21752	5.6838	5.81788	71.3492	0.234521
ENSMUSG00000000149	8.16067	8.15745	8.33195	8.26963	8.42064	8.19615	8.31562	8.26343	8.2674	8.45557	8.4579	8.24301	8.52227	8.56061	8.25589	8.39731	8.43299	8.14893	8.24649	8.36203	7.88128	8.34353	8.35053	7.81759	7.94724	7.75943	7.71245	7.90579	7.97272	7.77335	7.8058	8.11314	7.73634	7.74487	7.79472	8.21669	8.34513	8.2584	8.39362	8.44196	8.36206	8.25248	8.19178	7.84142	7.86365	7.89743	7.75864	309.867	0.249722
ENSMUSG00000000154	2.38902	2.36616	2.43706	2.42218	2.38039	2.32447	2.41136	2.29546	2.38935	2.333	2.3904	2.38519	2.51747	2.48554	2.43185	2.47939	2.48233	3.12166	3.15544	3.39009	3.32476	3.22576	3.3107	2.86513	2.82819	2.92057	2.94113	2.94097	2.86745	4.31183	4.44501	4.2172	5.18996	5.32967	5.18616	2.39742	2.40129	2.34376	2.37092	2.46273	2.46453	3.2224	3.28707	2.8713	2.91652	4.32468	5.23526	5.31809	0.075919
ENSMUSG00000000167	4.49983	4.61022	4.60409	4.53256	4.59626	4.16752	4.10236	4.17639	4.10255	4.14095	4.12846	4.46142	4.48669	4.45511	4.50958	4.4796	4.5351	4.61179	4.46311	4.59814	4.50392	4.33513	4.5983	4.38524	4.48657	4.31218	4.50224	4.45065	4.23264	4.03729	4.01811	3.82762	4.5428	4.30097	4.36086	4.57138	4.56441	4.14876	4.12399	4.46774	4.50809	4.55768	4.47911	4.39466	4.39518	3.96101	4.40154	23.7281	-0.044766
ENSMUSG00000000168	9.15164	9.12508	9.18208	9.16654	9.05249	9.23004	9.04897	9.10373	9.12952	8.88827	9.06345	9.28098	9.16305	9.354	9.29456	9.25079	9.2044	9.77604	9.42906	9.40076	9.67545	9.35009	9.40196	8.91666	9.01302	9.02811	8.97964	9.02184	9.09968	9.24255	8.86252	9.00618	8.75621	8.63452	8.55082	9.15293	9.10952	9.12758	9.02708	9.26601	9.24992	9.53529	9.47583	8.98593	9.03372	9.03708	8.64718	563.293	-0.0776285
ENSMUSG00000000171	7.74127	7.9062	8.12093	7.83951	8.21143	7.8058	7.7996	7.84757	7.62338	7.97402	8.0543	7.84228	8.31505	8.23001	7.80915	8.01925	8.05788	7.98638	8.31846	8.37979	7.95561	8.29656	8.21335	7.24456	7.26593	7.35501	7.14486	7.26695	7.31013	7.74386	7.86522	7.99539	7.75298	7.69815	7.87448	7.9228	8.02547	7.81766	7.8839	8.12912	7.96209	8.22821	8.15517	7.2885	7.24065	7.86816	7.77521	254.092	0.217797
ENSMUSG00000000184	7.99725	8.02753	8.21801	8.1031	8.18568	7.95348	8.26212	8.07334	8.12546	8.15917	8.3384	8.17428	8.18593	8.32371	8.06815	8.14736	8.01863	8.18156	8.115	8.03289	8.10869	7.78572	7.98352	7.21561	7.31243	7.30397	7.2685	7.68941	7.41245	7.71939	7.63066	7.7769	8.20645	8.07151	8.41052	8.08093	8.14439	8.09631	8.20768	8.22797	8.07804	8.10982	7.95931	7.27734	7.45679	7.70898	8.22949	276.612	0.119119
ENSMUSG00000000194	9.20674	9.29269	9.20078	9.18586	9.39958	9.22507	9.0233	9.14897	9.21891	9.18322	9.2501	9.4711	9.67823	9.5971	9.5581	9.53792	9.62796	9.53662	9.65656	9.89678	9.55938	10.0636	9.7414	9.68453	9.63994	9.65633	9.70432	9.47368	9.5892	9.59793	9.75416	9.87527	9.58908	9.68698	9.69391	9.2334	9.29272	9.13245	9.21741	9.58214	9.57466	9.69666	9.78813	9.66027	9.58907	9.74245	9.65666	613.919	0.115582
ENSMUSG00000000197	7.73572	7.66381	7.26024	7.37405	7.26514	8.06923	8.01549	8.03846	7.95188	8.06656	7.46419	8.73818	8.47045	7.82535	8.58106	8.66976	8.62499	8.87493	9.19355	9.27084	9.23703	9.49309	9.00066	9.78974	9.36998	9.36892	9.63681	9.20855	8.72691	9.49401	9.73397	9.22252	9.23437	9.46182	9.45058	7.55326	7.31959	8.04106	7.82755	8.34466	8.62527	9.11311	9.24359	9.50955	9.19076	9.4835	9.38225	181.989	-0.565234
ENSMUSG00000000202	9.85943	9.99143	10.3353	9.98622	10.4272	9.82217	9.72289	9.89072	9.73102	10.1449	10.2316	10.0325	10.612	10.4215	10.1437	10.1792	10.3682	10.1476	10.2157	10.3302	10.0051	10.7479	10.4041	9.66638	9.75447	9.58886	9.71626	9.19698	9.50903	9.88738	10.0517	10.1836	8.4564	8.50919	8.88442	10.062	10.2067	9.81193	10.0358	10.3554	10.2303	10.2312	10.3857	9.66991	9.47409	10.0409	8.61667	1142.35	0.247183
ENSMUSG00000000214	3.9472	4.01616	3.80345	3.76105	3.71249	4.46512	4.02585	3.90697	3.98751	4.05064	3.85055	4.15871	3.95352	3.76166	3.94111	4.02606	3.94259	4.2586	4.35919	4.35666	4.23493	4.3574	4.44807	3.91412	3.5894	3.48867	3.52866	3.50962	3.63765	4.23859	4.54654	4.16915	4.36813	4.21194	4.21178	3.92227	3.73677	4.13265	3.9629	3.95796	3.96992	4.32482	4.3468	3.66406	3.55865	4.31809	4.26395	15.333	-2.18965
ENSMUSG00000000223	7.8056	7.79882	8.06858	7.86872	8.01548	7.89497	8.06484	8.11104	7.93997	8.01092	8.10809	8.08641	8.18747	8.14862	8.13673	8.1787	8.0902	8.15742	8.20205	8.06212	8.15845	7.94905	8.05737	7.45571	7.53268	7.6204	7.54651	7.33981	7.52887	7.60546	7.63676	7.44678	7.21821	7.39672	7.61922	7.891	7.9421	8.02362	8.01966	8.14083	8.13521	8.14053	8.05496	7.53626	7.47173	7.563	7.41139	242.338	0.0949149
ENSMUSG00000000247	8.67354	8.83331	8.85796	8.73187	8.87994	8.82542	9.07705	8.76222	8.98867	9.19492	9.09936	8.88869	9.06615	9.08372	8.81917	8.85307	8.9245	9.12198	9.14344	9.08839	9.03415	8.93629	9.136	8.30633	8.49048	8.38873	8.29091	8.22685	8.57048	8.33633	8.08839	8.80905	7.76404	7.77047	7.88515	8.78827	8.8059	8.88823	9.09432	9.01285	8.86558	9.11794	9.03548	8.39518	8.36275	8.41126	7.80655	445.674	0.0335137
ENSMUSG00000000253	7.23729	7.34068	7.5007	7.28202	7.30085	7.29721	7.38315	7.33436	7.27222	7.50432	7.36906	7.5907	7.44609	7.3629	7.33848	7.48753	7.2665	7.82807	7.81828	7.69653	7.80461	7.68298	7.73139	6.89621	6.97178	7.05323	6.84078	7.02437	7.06807	7.31183	7.51565	7.26047	7.87695	7.78306	7.80825	7.35956	7.29144	7.33824	7.38186	7.46657	7.36417	7.78096	7.73966	6.97374	6.97774	7.36265	7.82275	162.09	-0.169876
ENSMUSG00000000263	4.83923	4.78065	4.78005	4.78097	4.61148	5.30059	5.21343	5.19722	5.14063	5.31314	5.00744	5.44685	5.73168	5.30078	5.80085	5.56658	5.5994	5.852	5.72667	6.07367	5.86586	6.37756	6.14114	5.83246	5.82616	5.79713	5.72396	5.58076	5.4542	5.9837	5.86754	5.65745	5.65986	5.77446	5.85062	4.79998	4.69622	5.23708	5.15374	5.4931	5.65561	5.88411	6.12819	5.81858	5.58631	5.83623	5.76165	27.7059	-0.614059
ENSMUSG00000000266	7.4199	7.50321	7.45248	7.45725	7.58113	7.5129	7.42457	7.45426	7.39582	7.34097	7.38679	7.72376	7.76986	7.88529	7.80097	7.71897	7.75759	7.86673	7.83364	7.74705	7.73447	7.77169	7.87698	7.5301	7.50451	7.5617	7.34016	7.60602	7.66485	7.5985	7.58875	7.62799	7.83936	7.74904	7.9623	7.45853	7.51919	7.46391	7.37453	7.79297	7.75918	7.81581	7.79438	7.5321	7.53701	7.60508	7.85024	179.075	0.141295
ENSMUSG00000000275	5.85096	5.96512	5.94259	5.9273	6.02068	5.9727	5.97581	5.96922	5.91334	5.82213	6.00908	6.239	5.95221	6.04523	6.1345	6.16342	6.10571	6.21264	6.10313	6.1127	6.0616	5.87582	6.05716	5.71749	5.85529	5.77944	5.79263	5.96805	5.86879	5.87288	5.71865	5.66102	5.92631	5.82058	6.02695	5.91956	5.97399	5.97258	5.91485	6.07881	6.13454	6.14282	5.99819	5.78407	5.87649	5.75085	5.92461	61.4775	0.190223
ENSMUSG00000000276	7.03478	6.95046	6.76068	6.92073	6.80153	7.11209	6.96362	7.02596	7.0026	6.96579	6.94287	7.62362	7.42098	7.12003	7.42615	7.51646	7.31519	7.76747	7.95233	7.8858	8.03124	8.07589	7.88741	8.00345	7.898	7.93573	8.04206	7.89957	7.51744	7.79915	8.0288	7.53992	7.80735	7.89086	7.78509	6.9153	6.86113	7.03389	6.97042	7.38821	7.41927	7.86854	7.99818	7.94573	7.81969	7.78929	7.82777	120.251	-0.151099
ENSMUSG00000000278	8.62022	8.68181	8.71725	8.65748	8.75474	8.57589	8.66612	8.6744	8.65132	8.77042	8.66711	8.73389	9.13402	9.01132	8.96777	8.97272	9.09955	8.94377	8.98445	9.28283	8.89823	9.49262	9.25253	8.95212	8.95105	8.9687	8.99738	8.74543	9.1443	8.72531	9.06138	9.12092	8.80507	8.95419	9.22687	8.67309	8.70611	8.6388	8.69628	8.95974	9.01334	9.07035	9.21446	8.95729	8.96237	8.96921	8.99538	412.288	0.0637662
ENSMUSG00000000282	5.72085	5.87869	5.91244	5.86369	5.89313	5.65531	5.73741	5.64322	5.62625	5.74111	5.9307	5.82055	6.27451	5.90938	5.89206	5.98095	6.10431	5.95261	6.31442	6.49913	6.12866	6.45722	6.36292	5.4689	5.33072	5.35104	5.46977	5.48788	5.58052	6.05817	6.10094	5.72055	6.01593	6.13337	6.16423	5.83733	5.87841	5.67865	5.76602	6.00148	5.99244	6.25539	6.31627	5.38355	5.51272	5.95989	6.10451	58.0186	0.133978
ENSMUSG00000000290	NA	NA	NA	NA	NA	3.81875	3.55696	3.54125	3.50228	3.56899	3.64466	NA	NA	NA	NA	NA	NA	2.89125	2.78502	2.87312	2.77361	2.78084	2.81768	2.89728	2.5985	2.60718	2.65899	2.69899	2.63804	4.07247	4.04445	4.09907	4.57191	4.50576	4.83082	NA	NA	3.63899	3.57198	NA	NA	2.8498	2.79071	2.70099	2.66534	4.07199	4.63616	NA	NA
ENSMUSG00000000295	7.05564	7.14136	6.91731	6.97488	6.8215	7.01725	6.78373	6.81584	6.94226	6.79658	6.88856	7.04346	7.05824	7.06978	6.95113	7.05241	7.07331	7.01755	6.97011	7.05765	6.91907	7.01195	6.97691	6.81917	6.74269	6.83498	6.7476	6.86368	6.83364	6.85695	6.86405	6.98504	7.11634	7.1018	6.87186	7.0381	6.89819	6.87227	6.8758	7.05716	7.02562	7.0151	6.96931	6.79895	6.81497	6.90201	7.03	128.159	-0.357039
ENSMUSG00000000296	6.76128	6.76092	6.75125	6.77823	6.68951	7.12662	6.94508	6.96739	7.12874	6.92302	6.92634	7.17267	7.24131	7.06542	7.28243	7.13921	7.2553	7.57217	7.34715	7.50255	7.41298	7.50461	7.57517	7.05233	7.24635	7.06788	7.15608	7.24293	7.12287	7.46986	7.20707	7.25493	7.34158	7.28028	7.12242	6.75781	6.73387	7.01303	6.9927	7.1598	7.22565	7.47396	7.49758	7.12219	7.17396	7.31062	7.24809	107.747	-0.0652819
ENSMUSG00000000301	3.73002	3.75136	3.72146	3.68226	3.83099	3.85399	3.83406	3.90933	3.93413	3.87734	3.9965	3.97761	4.03881	4.17326	4.03696	3.90679	4.00282	4.09866	4.13798	4.10703	4.05466	4.19793	4.01813	3.92846	3.88004	3.73439	3.87318	3.9982	4.03688	3.80603	4.00432	3.88486	3.88144	3.95482	4.0443	3.73428	3.75663	3.86579	3.93599	4.06323	3.98219	4.11456	4.09024	3.84763	3.96942	3.89841	3.96019	13.279	0.253953
ENSMUSG00000000303	3.3397	3.72012	3.27512	3.27902	3.24054	2.3944	2.44317	2.5095	2.43803	2.43995	2.36044	3.65417	3.7851	3.5839	4.05251	3.60154	4.18807	3.02022	2.95438	3.73475	3.15931	3.25697	3.12099	2.81904	2.85325	2.92497	2.9578	2.89413	3.28527	2.80472	3.75778	3.10049	2.94774	2.92528	2.89208	3.44498	3.25978	2.44902	2.41281	3.67439	3.94737	3.23645	3.17909	2.86576	3.04573	3.221	2.9217	12.0955	-3.37076
ENSMUSG00000000305	7.69732	7.81506	7.77022	7.90105	7.93434	7.89279	7.75774	7.85122	7.80515	7.99766	7.88914	8.0621	8.44504	8.12449	8.1076	8.25154	8.32693	8.01515	8.35152	8.34437	8.28013	8.6978	8.38621	8.47301	8.22984	8.40429	8.49404	7.9099	8.09997	8.13229	8.47149	8.26379	7.86908	7.78994	7.99268	7.76087	7.9177	7.83392	7.89732	8.21054	8.22869	8.23701	8.45472	8.36905	8.16797	8.28919	7.8839	227.52	0.323911
ENSMUSG00000000308	7.12994	7.06046	6.89282	6.88675	6.73728	7.3776	7.87717	7.7177	7.46768	7.63461	7.30035	8.12905	7.55	7.36395	7.88844	7.80827	7.43692	8.07663	8.46394	8.18528	8.4978	8.04016	8.34349	7.63399	7.63813	8.01126	7.92769	7.50142	7.44101	7.89492	8.05832	7.53029	7.20128	7.39086	7.566	7.02774	6.81202	7.65749	7.46754	7.681	7.71121	8.24195	8.29382	7.76112	7.62337	7.82784	7.38605	125.381	-0.558453
ENSMUSG00000000325	5.64801	5.85465	5.81945	5.75762	5.81184	5.8482	5.9901	5.867	5.87692	5.88838	6.07233	6.23313	6.18136	6.17893	6.25673	6.09896	6.17833	6.24399	6.26165	6.23602	6.14375	6.21086	6.13911	5.04562	5.39174	5.11226	5.10337	5.22399	5.44063	5.90828	5.78537	5.93607	6.28334	6.25376	6.32995	5.77404	5.78473	5.90177	5.94588	6.19781	6.17801	6.24722	6.16458	5.18321	5.256	5.87657	6.28901	55.1303	0.0286401
ENSMUSG00000000326	8.59578	8.59854	8.74747	8.74389	8.79441	8.79428	8.92051	8.78537	8.79907	8.93413	9.00399	8.83191	9.10664	9.07947	8.92815	8.95798	8.91874	8.93172	9.07006	9.1151	8.96195	9.09732	9.1573	8.32988	8.43035	8.38227	8.32787	8.40888	8.37656	8.62735	8.64991	8.71513	8.61208	8.68762	8.8782	8.64726	8.76915	8.83338	8.9124	9.00601	8.93496	9.03896	9.07219	8.38083	8.3711	8.66413	8.72597	416.17	0.221372
ENSMUSG00000000339	7.34113	7.20783	7.33511	7.35763	7.21417	7.42372	7.31493	7.38241	7.47246	7.19961	7.28458	7.61223	7.35764	7.44745	7.44212	7.57174	7.44561	7.68825	7.65301	7.57293	7.69026	7.56627	7.63894	7.23022	7.34975	7.30795	7.31421	7.50259	7.18413	7.4815	7.36949	7.51911	7.91481	7.65228	7.37523	7.29469	7.2859	7.37369	7.31888	7.47244	7.48649	7.63806	7.63183	7.29597	7.33364	7.4567	7.64744	157.291	-0.0244727
ENSMUSG00000000340	8.70818	8.70852	8.89465	8.8878	8.80489	8.70741	8.64508	8.71029	8.78951	8.51517	8.80288	8.74886	8.82206	9.04098	8.82215	8.83883	8.93482	9.03242	8.75569	8.82619	8.8214	8.61473	8.70982	8.17783	8.36208	8.20977	8.0968	8.31381	8.36551	8.3251	7.96481	8.61312	8.27691	8.13849	8.20544	8.77045	8.84635	8.68759	8.70252	8.87063	8.86527	8.87143	8.71532	8.24989	8.25871	8.30101	8.20694	447.711	0.131377
ENSMUSG00000000346	10.092	10.1246	10.3057	10.211	10.2358	10.0645	9.89959	9.92746	9.97846	9.85325	10.0815	10.055	10.3239	10.3583	10.0856	10.1606	10.1963	10.264	10.2397	10.3399	10.1213	10.3328	10.365	9.53581	9.59725	9.6481	9.45467	9.58209	9.73334	9.75585	9.71035	10.0724	9.9832	9.98808	10.0886	10.1741	10.2234	9.96387	9.97106	10.2457	10.1475	10.2812	10.273	9.59372	9.59003	9.84618	10.0199	1174.9	0.0754146
ENSMUSG00000000355	8.28266	8.09243	8.07359	8.29133	8.01858	8.28435	7.94031	8.1399	8.30677	7.94474	7.8301	8.58652	8.15107	8.29257	8.48456	8.22546	8.42721	8.95586	8.71743	8.53938	8.81764	8.54323	8.44741	8.57787	8.64127	8.49918	8.60272	8.79997	8.45246	8.50345	8.23006	8.39702	8.53711	8.24533	8.24265	8.14956	8.15495	8.12152	8.0272	8.34339	8.37908	8.73756	8.60276	8.57277	8.61839	8.37684	8.3417	287.217	0.015601
ENSMUSG00000000365	NA	NA	NA	NA	NA	NA	NA	NA	NA	NA	NA	NA	NA	NA	NA	NA	NA	2.08238	2.19356	2.06221	2.12973	2.05939	2.09461	2.51752	2.63215	2.61305	2.64736	2.68455	2.52855	NA	NA	NA	NA	NA	NA	NA	NA	NA	NA	NA	NA	2.11272	2.09458	2.58757	2.62015	NA	NA	NA	NA
ENSMUSG00000000374	8.06229	7.9303	8.06079	7.88346	8.07959	8.05453	7.99583	8.07818	8.08676	8.123	8.01044	8.36168	8.30822	8.28847	8.30166	8.4215	8.35219	8.22308	8.27826	8.28986	8.18319	8.19151	8.22926	8.09993	8.06499	8.07353	7.99603	8.1847	8.11841	8.18345	8.24029	8.29797	8.51043	8.51587	8.54281	8.01779	7.98152	8.04285	8.0734	8.31946	8.35845	8.26373	8.20132	8.07948	8.09971	8.24057	8.52304	257.342	-0.063901
ENSMUSG00000000378	5.48597	5.52756	5.62795	5.44897	5.54567	5.73396	5.86679	5.71266	5.68722	5.79272	5.73551	5.83255	6.03398	5.93114	5.97092	5.8745	5.85723	5.81139	5.73334	5.80592	5.67972	5.70309	5.94965	5.15301	5.06864	5.39419	5.19359	5.05784	5.26501	5.7819	5.75006	5.69066	5.72016	5.93675	6.14112	5.54716	5.49732	5.77114	5.73848	5.93256	5.90088	5.78355	5.77749	5.20528	5.17214	5.74087	5.93267	46.1711	-0.20122
ENSMUSG00000000384	5.70709	5.82201	5.78262	5.67836	5.78574	5.79941	5.88723	5.67612	5.62817	5.84153	5.95721	6.12657	5.94777	6.021	5.96301	6.09433	5.96809	5.9408	5.94852	5.84652	5.77864	5.89708	5.88953	5.16732	5.37123	5.43378	5.31966	5.35831	5.17131	5.71273	5.87118	5.83444	5.77398	5.79186	5.8541	5.77058	5.73205	5.78758	5.80897	6.03178	6.00848	5.91195	5.85508	5.32411	5.28309	5.80611	5.80665	54.0822	-0.135373
ENSMUSG00000000386	NA	NA	NA	NA	NA	NA	NA	NA	NA	NA	NA	NA	NA	NA	NA	NA	NA	NA	NA	NA	NA	NA	NA	2.17799	2.16841	2.16837	2.143	2.44865	2.2935	2.21088	2.30393	2.25437	2.40776	2.38782	2.57424	NA	NA	NA	NA	NA	NA	NA	NA	2.17159	2.29505	2.25639	2.45661	NA	NA
ENSMUSG00000000392	NA	NA	NA	NA	NA	NA	NA	NA	NA	NA	NA	NA	NA	NA	NA	NA	NA	NA	NA	NA	NA	NA	NA	2.54471	2.44403	2.64615	2.60142	2.41967	2.40247	NA	NA	NA	NA	NA	NA	NA	NA	NA	NA	NA	NA	NA	NA	2.54497	2.47452	NA	NA	NA	NA
ENSMUSG00000000399	9.41514	9.39683	9.61071	9.47849	9.56236	9.43748	9.57463	9.57582	9.42348	9.60325	9.61606	9.65462	9.56775	9.71821	9.52913	9.70559	9.55248	9.62639	9.66235	9.56402	9.60201	9.44672	9.64877	8.82016	8.93291	9.00228	8.81607	8.88736	9.02944	9.22927	9.17626	9.09138	9.17814	9.07935	9.09938	9.47423	9.52043	9.52931	9.5476	9.64686	9.59573	9.61759	9.56583	8.91845	8.91096	9.16564	9.11896	722.955	0.073981
ENSMUSG00000000402	7.52733	7.37198	7.27106	7.49458	7.31105	7.52904	7.30956	7.35248	7.46581	7.40671	7.41922	7.57746	7.65941	7.68731	7.69967	7.65574	7.71813	7.99607	7.75866	7.91365	7.73525	8.13555	8.02056	8.11509	7.95162	8.0319	7.90804	7.46306	7.995	7.39089	7.62544	7.42898	6.65345	6.88126	6.99999	7.39013	7.40282	7.39703	7.43058	7.64139	7.69118	7.88946	7.96379	8.03287	7.7887	7.48177	6.8449	169.954	0.0222198
ENSMUSG00000000416	6.82507	6.71488	6.6134	6.88013	6.67038	6.84355	6.62313	6.90462	6.84211	6.71911	6.72859	7.29046	7.04102	7.03674	7.10885	7.18568	7.0324	7.72052	7.66462	7.53863	7.75702	7.66515	7.46793	7.39035	7.3913	7.54002	7.43209	7.52395	7.0367	7.76754	7.69019	7.63166	7.2298	7.31399	7.26474	6.71778	6.77525	6.79043	6.76327	7.12274	7.10898	7.64125	7.63003	7.44056	7.33091	7.69646	7.26951	108.202	0.151623
ENSMUSG00000000420	9.93374	9.95995	9.95896	10.0684	9.96944	9.9172	9.69305	9.80531	9.83859	9.74394	9.75224	10.1041	10.1637	10.2471	10.2886	10.1228	10.307	10.441	10.2088	10.4356	10.2777	10.6129	10.3776	10.5667	10.5652	10.5737	10.594	10.3184	10.5514	10.2465	10.3692	10.5996	10.3074	10.4868	10.2975	9.95088	10.0189	9.80519	9.77826	10.1716	10.2395	10.3618	10.4227	10.5685	10.488	10.4051	10.3639	1009.91	0.11583
ENSMUSG00000000439	6.65819	6.60755	6.74205	6.78344	6.76001	6.52387	6.67989	6.61871	6.64793	6.69953	6.8814	6.84059	7.03151	6.95727	6.73018	7.01898	6.95872	7.13806	6.98499	6.91011	6.96797	6.98882	7.12628	6.54443	6.48139	6.65663	6.52359	6.37898	6.39292	6.4624	6.54431	6.4749	6.49199	6.49678	6.48969	6.66926	6.77172	6.60749	6.74295	6.94312	6.90263	7.01105	7.02769	6.56082	6.43183	6.49387	6.49282	104.98	0.265023
ENSMUSG00000000440	2.95397	2.9345	2.95253	2.97692	2.9543	2.95871	2.94573	2.90684	2.94686	2.95893	2.86356	2.89567	2.8161	2.80922	2.87706	2.9699	2.76505	3.41313	3.55045	3.45674	3.54216	3.39992	3.41482	2.94918	2.9689	2.93866	3.00115	2.84469	2.94545	2.90406	2.98107	2.89291	2.81322	2.69394	2.66859	2.947	2.96561	2.93709	2.92312	2.84033	2.87067	3.47344	3.4523	2.95225	2.93043	2.92601	2.72525	7.76767	0.295725
ENSMUSG00000000441	7.45522	7.36209	7.5876	7.62251	7.51752	7.5184	7.42184	7.47614	7.47215	7.45102	7.64264	7.71732	7.73989	7.88268	7.61398	7.69306	7.61916	7.53049	7.54071	7.49741	7.43395	7.42128	7.48857	6.88744	6.8864	6.95973	6.87965	7.08564	6.8684	7.05503	6.96633	7.37833	7.22268	7.11029	7.16971	7.4683	7.57002	7.47213	7.52194	7.77996	7.64207	7.52287	7.44794	6.91119	6.94457	7.13323	7.16756	183.229	0.212534
ENSMUSG00000000486	2.33977	2.31866	2.31853	2.30736	2.32371	2.16599	2.10347	2.18017	2.13166	2.13973	2.1967	2.71249	2.7591	2.74277	2.78075	2.66857	2.6749	2.33856	2.5824	2.56735	2.52715	2.53358	2.51848	NA	NA	NA	NA	NA	NA	2.62894	2.72741	2.70668	2.78029	2.73409	2.72813	2.32565	2.31553	2.14988	2.15603	2.73812	2.70807	2.49611	2.5264	NA	NA	2.68768	2.7475	4.99005	-0.245217
ENSMUSG00000000489	3.11373	3.15769	3.04334	3.06038	3.12078	2.86263	2.84546	2.90354	2.82167	2.94533	2.7876	3.8679	3.59473	3.60513	3.55053	3.71094	3.61032	4.13943	4.17549	3.98867	4.17869	4.13611	4.04462	3.82621	3.74484	3.97663	3.93435	3.82465	3.77598	4.69066	4.71731	4.74973	4.57813	4.60786	5.14142	3.10492	3.09058	2.87055	2.85154	3.68925	3.62393	4.1012	4.11981	3.84922	3.84499	4.71923	4.7758	8.63413	-0.217227
ENSMUSG00000000530	2.59776	2.5649	2.5752	2.55384	2.60092	2.12894	2.14238	2.09075	2.09362	2.12082	2.10526	2.83385	2.79737	2.81901	2.7353	2.83879	2.70488	2.75131	2.95547	2.81342	2.69041	2.9011	2.81907	2.86497	2.80614	2.75894	2.89634	2.84077	2.76644	3.3262	3.34618	3.40315	3.26654	3.25175	3.44387	2.57929	2.57738	2.12069	2.10657	2.81674	2.75966	2.84007	2.80353	2.81001	2.83452	3.35851	3.32072	5.91593	-0.0272403
ENSMUSG00000000531	4.2916	4.24388	4.17132	4.19447	4.12621	4.76212	4.87741	4.96331	4.72046	4.98693	4.71971	5.60499	5.16658	4.76324	5.04273	5.27598	5.13862	5.55179	5.78916	5.6068	6.02191	5.58203	5.78037	5.12196	5.00097	5.17413	5.26349	5.3372	4.95468	5.84695	5.54535	5.21806	5.65446	5.62907	5.48394	4.2356	4.16034	4.86761	4.80903	5.17827	5.15244	5.64925	5.79477	5.09902	5.18512	5.53679	5.58916	18.8204	-0.61446
ENSMUSG00000000532	7.46754	7.52294	7.2866	7.32868	7.33398	7.31317	7.45634	7.52094	7.32326	7.61861	7.21046	8.15577	8.1257	7.82702	8.0287	8.12983	8.03675	8.03646	8.3663	8.445	8.32172	8.66151	8.31361	8.57284	8.29317	8.22203	8.48863	8.27174	7.80052	8.56476	8.6058	8.4028	8.53818	8.78289	8.75789	7.42569	7.33133	7.43015	7.38411	8.03617	8.0651	8.28259	8.43228	8.36268	8.18696	8.52446	8.69299	168.75	-0.223121
ENSMUSG00000000538	9.28137	9.24358	9.37413	9.29437	9.28041	9.47495	9.57875	9.41598	9.5018	9.50594	9.66298	9.60098	9.65052	9.6529	9.46999	9.62134	9.56856	9.85157	9.68731	9.68343	9.85575	9.49864	9.763	8.96747	9.0461	9.09292	8.98974	9.08614	9.31916	9.2374	9.25324	9.20309	9.14619	9.00961	9.0322	9.29969	9.28739	9.48989	9.55691	9.6348	9.55329	9.74077	9.7058	9.0355	9.13168	9.23124	9.06267	628.701	-0.0250005
ENSMUSG00000000552	7.56372	7.75065	7.70958	7.67837	7.60761	7.5951	7.66633	7.5023	7.57763	7.64894	7.74556	7.68387	7.90954	7.93017	7.78022	7.74697	7.85101	7.84721	7.81699	7.84125	7.67463	7.79489	7.74877	7.13684	7.13998	7.21882	7.0334	7.07643	7.27339	7.40464	7.22648	7.49199	7.47083	7.34995	7.2145	7.67465	7.64299	7.58791	7.65738	7.84119	7.79273	7.83515	7.73943	7.16521	7.12774	7.37437	7.34509	203.32	-0.0751714
ENSMUSG00000000555	4.32133	4.31302	4.27383	4.2859	4.42193	4.15355	4.01838	4.05516	4.01597	4.05829	4.03997	4.6296	4.75666	4.60154	4.5305	4.61936	4.70976	4.48532	4.71694	4.70269	4.59327	4.97263	4.81266	4.91804	4.66633	4.81067	4.86028	4.83508	5.18486	5.3447	5.34004	5.21176	5.90132	6.12356	6.16988	4.30273	4.35391	4.0757	4.03807	4.6626	4.61987	4.63498	4.79285	4.79835	4.96007	5.29883	6.06492	19.9332	0.387399
ENSMUSG00000000560	10.3826	10.2885	10.1723	10.6022	10.398	10.5597	9.94265	10.2789	10.2864	10.0414	9.997	10.5363	10.5309	10.6242	10.7242	10.545	10.6662	10.9318	10.8347	10.9177	10.8314	11.2538	10.962	11.1367	11.1019	11.0884	11.1868	10.9941	10.8524	10.6961	10.941	10.9525	10.0475	10.0247	10.2649	10.2811	10.5001	10.2604	10.1083	10.5638	10.6451	10.8948	11.0157	11.109	11.0111	10.8632	10.1124	1337.2	0.364843
ENSMUSG00000000563	10.0117	9.88443	10.1496	10.1117	10.1497	10.0099	9.81251	10.0004	9.95701	9.77227	9.96479	10.0541	10.0288	10.2387	10.066	10.1035	10.2006	10.2525	10.2062	10.1893	10.1603	10.1185	10.2131	9.52711	9.64364	9.63413	9.49017	9.64757	9.63085	9.82764	9.64126	9.77583	9.79603	9.5711	9.54727	10.0152	10.1307	9.94093	9.89802	10.1072	10.1234	10.216	10.164	9.60163	9.58953	9.74825	9.63813	1074.23	0.184904
ENSMUSG00000000567	10.702	10.8249	10.9796	10.7673	10.9924	10.7899	11.0486	10.8815	10.9485	11.0717	11.3847	10.9295	11.3134	11.2678	10.9843	10.9916	11.1096	11.3371	11.0319	11.0417	11.1473	10.9227	11.1982	9.86108	10.0313	9.93872	10.0011	10.0063	10.427	10.45	10.1703	10.6721	10.348	10.2498	10.2438	10.8355	10.8799	10.9067	11.135	11.1702	11.0285	11.1369	11.0894	9.94371	10.1448	10.4308	10.2805	1862.76	0.0730543
ENSMUSG00000000568	9.4693	9.41914	9.27913	9.46053	9.1794	9.51837	9.08283	9.25574	9.43384	9.04693	9.20916	9.56665	9.30459	9.59904	9.58775	9.44826	9.51097	10.1462	9.63727	9.57707	10.0312	9.5	9.60868	9.72604	9.72656	9.63859	9.69492	9.59368	9.62689	9.37046	9.2104	9.35982	9.26847	9.19221	8.87767	9.38919	9.31997	9.28564	9.22998	9.49009	9.51566	9.78685	9.71328	9.69706	9.6385	9.31356	9.11278	663.188	-0.112689
ENSMUSG00000000581	7.61727	7.69871	7.43906	7.61693	7.52078	7.6335	7.33684	7.42937	7.66391	7.46707	7.31659	7.79434	7.71369	7.52392	7.61771	7.75215	7.83899	8.0324	7.90191	7.86305	8.03687	7.83929	7.89669	8.11664	7.99045	7.96401	8.00152	8.0594	8.00306	7.83709	7.80758	7.968	8.25928	8.26147	8.07193	7.58501	7.56885	7.46657	7.48252	7.67732	7.73629	7.93246	7.92428	8.0237	8.02133	7.87089	8.19756	192.556	-0.045503
ENSMUSG00000000594	11.0021	11.1302	11.201	11.1491	11.2683	10.9552	11.0302	11.0396	11.0299	11.2595	11.2202	11.072	11.6629	11.4566	11.2959	11.3457	11.5069	11.2311	11.2246	11.5021	11.0239	11.7123	11.6141	11.0428	11.0399	11.1246	11.0473	10.8885	11.2695	11.1163	11.3767	11.4829	11.3099	11.5923	11.6528	11.1111	11.2087	11.0083	11.1699	11.3972	11.3828	11.3193	11.4501	11.0691	11.0684	11.3253	11.5183	2281.68	0.156791
ENSMUSG00000000600	7.67796	7.5729	7.45433	7.72515	7.46594	7.77428	7.55024	7.59345	7.73936	7.42979	7.47695	7.91672	7.47968	7.92871	7.94271	7.78184	7.76899	8.29954	7.94555	7.84493	8.30374	7.74871	7.87862	7.83727	7.94189	7.83565	7.78545	8.04224	7.96146	7.52028	7.58408	7.62819	7.52677	7.53347	7.43906	7.5684	7.59555	7.63932	7.5487	7.77504	7.83118	8.03001	7.97702	7.8716	7.92971	7.57752	7.49976	193.329	0.0632161
ENSMUSG00000000605	10.4304	10.4946	10.4608	10.511	10.5933	10.3103	10.4053	10.3335	10.3877	10.4961	10.3602	10.5357	10.8407	10.6978	10.6223	10.6403	10.7281	10.6617	10.8721	11.0288	10.6801	11.2282	10.9899	10.7139	10.6553	10.6389	10.6913	10.4994	10.6771	10.6037	10.9281	10.9318	10.4537	10.7869	10.9122	10.4619	10.5521	10.3497	10.4147	10.6914	10.6635	10.8542	10.966	10.6693	10.6226	10.8212	10.7176	1448.4	0.15101
ENSMUSG00000000627	4.64056	4.64945	4.52973	4.50776	4.50645	4.53743	4.62238	4.81211	4.6392	4.68042	4.53199	5.56865	5.57215	5.20272	5.84139	5.58978	5.49045	5.93003	6.34829	6.4032	6.34261	6.54692	6.1147	6.317	6.16195	6.12117	6.34031	6.08317	5.74543	6.3668	6.54458	5.94597	6.16647	5.9307	6.2048	4.60658	4.5071	4.65731	4.61721	5.44784	5.64054	6.22717	6.33475	6.20004	6.0563	6.28578	6.10066	24.0702	-0.668629
ENSMUSG00000000628	6.3122	6.30768	6.46579	6.50759	6.5794	6.55055	6.55365	6.55442	6.56134	6.45687	6.69518	5.89942	6.04622	6.25355	5.79462	6.30544	5.99895	5.86817	6.10212	6.0502	6.05364	6.02014	6.24984	4.90733	5.03904	5.01754	5.10461	4.94522	5.21808	4.78522	5.02498	5.07099	4.87855	4.81283	4.83775	6.36189	6.54349	6.55287	6.57113	6.0664	6.033	6.00683	6.10787	4.98797	5.0893	4.9604	4.84304	87.0947	0.512262
ENSMUSG00000000631	7.55386	7.57379	7.51072	7.49618	7.58694	7.72722	7.98027	7.87452	7.60577	7.85889	7.79888	7.69986	7.96784	7.8066	7.71523	7.93295	7.8647	7.87428	7.97708	8.12032	8.074	7.82236	8.05058	7.25517	7.43794	7.78469	7.58417	7.40586	7.64354	7.29467	7.55625	7.60354	7.68888	7.82346	8.1308	7.54612	7.54156	7.86067	7.75451	7.82477	7.83763	7.99056	7.98232	7.4926	7.54452	7.48482	7.88105	186.738	-0.00469739
ENSMUSG00000000632	8.69883	8.79124	8.06673	8.14473	8.10197	8.92588	8.95354	8.94774	8.67119	9.24643	8.32682	9.44872	9.5385	8.58273	9.19639	9.47643	9.59734	9.9555	10.3717	10.4635	10.4684	10.6864	10.474	10.6368	10.1613	10.5209	10.5921	9.933	9.6181	10.7248	11.1494	10.32	10.2351	10.6228	10.4856	8.51893	8.12335	8.94239	8.74814	9.18998	9.42339	10.2636	10.5429	10.4397	10.0477	10.7314	10.4478	351.152	-0.853466
ENSMUSG00000000682	NA	NA	NA	NA	NA	NA	NA	NA	NA	NA	NA	NA	NA	NA	NA	NA	NA	NA	NA	NA	NA	NA	NA	2.26941	2.25986	2.28779	2.36423	2.46094	2.3485	3.48096	3.42194	3.36315	4.06838	3.88156	3.9591	NA	NA	NA	NA	NA	NA	NA	NA	2.27235	2.39122	3.42201	3.96968	NA	NA
ENSMUSG00000000686	2.70796	2.69964	2.7537	2.7554	2.68442	2.78444	2.76484	2.78406	2.80015	2.7978	2.83375	2.93036	2.99699	3.03003	2.99538	2.98212	2.96953	2.81914	2.96662	2.87639	2.84125	3.05837	3.00883	1.87592	1.84058	1.73235	1.86012	1.74482	1.91087	3.07955	3.12102	3.12717	3.2973	3.12206	3.10939	2.72044	2.71991	2.77778	2.81056	2.98579	2.98234	2.88739	2.96948	1.81629	1.8386	3.10925	3.17625	6.69574	-0.0149682
ENSMUSG00000000690	NA	NA	NA	NA	NA	NA	NA	NA	NA	NA	NA	1.68021	1.70594	1.73692	1.86032	1.7157	1.78414	1.8227	1.6258	1.7189	1.63515	1.80249	1.81181	NA	NA	NA	NA	NA	NA	NA	NA	NA	NA	NA	NA	NA	NA	NA	NA	1.70769	1.78672	1.72247	1.74982	NA	NA	NA	NA	NA	NA
ENSMUSG00000000693	7.16474	7.20698	7.28532	7.27649	7.34371	7.1002	7.25298	7.21764	7.13737	7.48668	7.3751	7.164	7.5544	7.51913	7.31188	7.43273	7.53033	7.66642	7.58223	7.74648	7.50848	7.97136	7.81381	7.36167	7.2496	7.22575	7.26287	7.03237	7.44404	7.33966	7.46169	7.70189	7.30001	7.46631	7.74672	7.21901	7.3101	7.19028	7.33305	7.41251	7.42498	7.66504	7.76455	7.27901	7.24643	7.50108	7.50435	153.023	0.211002
ENSMUSG00000000706	NA	NA	NA	NA	NA	NA	NA	NA	NA	NA	NA	NA	NA	NA	NA	NA	NA	1.86397	1.82997	1.83249	1.99472	1.9496	1.9031	NA	NA	NA	NA	NA	NA	NA	NA	NA	NA	NA	NA	NA	NA	NA	NA	NA	NA	1.84214	1.94914	NA	NA	NA	NA	NA	NA
ENSMUSG00000000708	6.82365	6.75686	6.9336	6.86334	6.99626	6.91716	6.82808	6.77088	6.97308	6.82609	6.89354	7.03126	7.03986	7.2097	7.01522	6.99877	7.00726	7.03367	6.84802	6.83131	6.77707	6.89615	6.82709	6.70819	6.81036	6.79777	6.6432	7.01027	7.1177	6.74114	6.62862	7.12159	7.45453	7.52494	7.41417	6.83804	6.9298	6.8387	6.89757	7.09361	7.00709	6.90433	6.83344	6.77211	6.92372	6.83045	7.46455	117.669	0.234501
ENSMUSG00000000711	7.35224	7.34858	7.4113	7.36132	7.37643	7.17744	7.00809	7.24698	7.08696	7.02271	7.13574	7.31868	7.32388	7.48938	7.48503	7.3893	7.44494	7.44779	7.90092	7.7629	7.55343	7.802	7.77009	7.063	6.90826	7.12814	6.91641	6.91108	7.23679	7.18612	7.25734	7.42771	7.33703	7.26755	7.43452	7.37071	7.36887	7.14417	7.0818	7.37732	7.43976	7.70387	7.7085	7.03314	7.02143	7.29039	7.34637	165.422	-0.00513327
ENSMUSG00000000732	7.46563	7.59077	7.64845	7.65532	7.81064	7.63237	7.25571	7.61267	7.56055	7.50549	7.5614	7.61079	7.93745	7.96248	7.81103	7.87669	7.86928	7.98098	7.95588	8.125	7.71607	8.30072	8.08942	7.69853	7.8976	8.07461	7.71761	7.47198	7.76156	8.00804	8.07319	8.24972	8.20193	8.15292	7.83109	7.56828	7.73298	7.50025	7.54248	7.83691	7.85233	8.02062	8.0354	7.89025	7.65038	8.11032	8.06198	199.995	0.354714
ENSMUSG00000000738	6.71282	6.77401	6.80299	6.7365	6.86501	6.95034	7.03195	6.87688	6.95074	7.04264	6.99234	6.969	7.04229	7.07389	6.92232	6.98094	6.96799	6.95092	7.0066	7.19875	7.05802	7.14078	7.04309	6.69818	6.74602	6.58421	6.69399	6.81099	6.69653	6.85597	6.65264	7.0362	7.00289	7.17964	7.05348	6.76328	6.80076	6.95306	6.99524	7.02839	6.95708	7.05209	7.08063	6.67614	6.73384	6.84827	7.07867	109.786	0.105819
ENSMUSG00000000740	2.47144	2.48856	2.48611	2.49134	2.48771	2.46033	2.45036	2.50145	2.48008	2.55906	2.66612	2.83639	2.81777	2.9032	2.92564	2.91137	2.89092	3.93367	3.46793	3.35069	3.6825	3.47345	3.415	2.95706	3.05644	2.94038	2.99535	3.01414	3.03196	3.3496	3.2827	3.39918	3.1746	3.27997	3.31515	2.48204	2.48953	2.47071	2.56842	2.85245	2.90931	3.5841	3.52365	2.98463	3.01381	3.34383	3.25657	5.5992	0.161716
ENSMUSG00000000743	7.51203	7.55104	7.54622	7.49486	7.4472	7.52139	7.57753	7.57541	7.51122	7.78945	7.69147	7.78775	7.93023	7.88509	7.74934	7.79251	7.84038	7.75128	7.84626	7.86323	7.65635	7.8785	7.98269	7.15213	7.3717	7.1625	7.13211	7.21206	7.30502	7.57341	7.63291	7.65548	7.67856	7.70565	7.92888	7.53643	7.47103	7.55811	7.66405	7.86769	7.79408	7.82026	7.83918	7.22878	7.2164	7.6206	7.77103	182.624	-0.146711
ENSMUSG00000000751	9.17599	9.16172	9.24636	9.19466	9.1404	9.16284	9.18434	9.0973	9.24642	9.02865	9.30994	9.20572	9.15175	9.34215	9.30966	9.16855	9.16606	9.69264	9.22909	9.26034	9.40914	9.09313	9.45255	8.43305	8.6281	8.66557	8.52631	8.49358	8.86796	8.61647	8.62177	8.69907	8.33865	8.3725	8.57506	9.19469	9.16753	9.14816	9.195	9.23321	9.21476	9.39402	9.31827	8.57557	8.62928	8.64577	8.42874	582.072	-0.0503218
ENSMUSG00000000753	7.18398	7.17357	7.2749	7.1309	7.35593	7.45064	7.22188	7.1881	7.1908	7.25208	7.402	7.22639	7.48989	7.55894	7.20301	7.39714	7.44464	6.98025	7.24809	7.26404	7.04589	7.35248	7.35452	7.50874	7.46631	7.32981	7.29725	7.43131	7.23744	7.01285	7.38354	7.78767	8.54797	8.39716	8.62091	7.21081	7.24341	7.28688	7.28163	7.42507	7.34826	7.16413	7.25096	7.43495	7.322	7.39469	8.52201	149.823	0.0931272
ENSMUSG00000000759	6.65447	6.56606	6.51117	6.5299	6.42716	6.62485	6.74227	6.63185	6.65338	6.58998	6.61892	6.63825	6.8209	6.76375	6.67326	6.77497	6.72694	6.72654	6.70087	6.72992	6.6542	6.56801	6.60799	6.42672	6.41471	6.36756	6.38716	6.43401	6.21365	6.65324	6.64374	6.41775	6.81804	6.68169	6.46661	6.57723	6.47853	6.66632	6.62076	6.74097	6.72506	6.71911	6.61007	6.40299	6.34494	6.57158	6.65545	93.6641	-0.286114
ENSMUSG00000000766	4.75984	4.61058	4.44038	4.43666	4.53197	4.74042	4.70472	4.74183	4.65015	4.70697	4.47808	5.42088	5.52638	5.01748	5.40953	5.4929	5.52291	5.88794	5.86473	6.06732	6.03954	6.50043	5.93478	6.4945	6.08115	5.98236	6.273	6.04405	5.79534	6.23227	6.40106	6.23761	5.91742	6.22068	6.06507	4.6036	4.48432	4.72899	4.61174	5.32158	5.47511	5.94	6.15825	6.186	6.03746	6.29031	6.06773	24.3357	-0.827633
ENSMUSG00000000776	6.02725	5.90865	5.9712	6.10671	6.08304	5.9469	5.95953	6.03855	5.97591	6.04404	6.14926	6.19326	6.10942	6.40029	6.12967	6.20699	6.1121	6.52783	6.26898	6.2665	6.36467	6.20233	6.20777	5.60678	5.62353	5.53249	5.56571	5.66934	5.52253	5.73469	5.78378	5.76174	5.54743	5.54337	5.41534	5.96904	6.09488	5.98166	6.05641	6.23432	6.14959	6.35444	6.25826	5.5876	5.58586	5.76007	5.50205	65.1411	0.4095
ENSMUSG00000000782	2.6256	2.68145	2.63995	2.64581	2.64078	2.18008	2.19044	2.17562	2.26377	2.16897	2.24621	NA	NA	NA	NA	NA	NA	2.15292	2.09179	2.15648	2.09409	2.05233	2.0295	NA	NA	NA	NA	NA	NA	2.65382	2.68573	2.63322	2.80151	2.78748	2.69254	2.649	2.64329	2.18205	2.22632	NA	NA	2.13373	2.05864	NA	NA	2.65759	2.76051	6.3094	-0.118031
ENSMUSG00000000787	9.22511	9.15317	9.4709	9.2539	9.3738	9.36097	9.48383	9.53604	9.3152	9.26635	9.23505	9.78712	9.29546	9.61659	9.73812	9.73713	9.31408	10.3222	9.86404	9.63885	10.3339	9.58391	9.83377	9.39927	9.45752	9.34514	9.62929	9.26236	9.38553	9.59494	9.53779	8.90856	9.59395	9.43272	9.10304	9.28306	9.31385	9.46028	9.2722	9.56639	9.59644	9.94168	9.91718	9.40064	9.42572	9.3471	9.37657	632.634	0.0415902
ENSMUSG00000000791	NA	NA	NA	NA	NA	NA	NA	NA	NA	NA	NA	NA	NA	NA	NA	NA	NA	NA	NA	NA	NA	NA	NA	NA	NA	NA	NA	NA	NA	1.31521	1.28574	1.28152	1.54301	1.3548	1.46664	NA	NA	NA	NA	NA	NA	NA	NA	NA	NA	1.29416	1.45482	NA	NA
ENSMUSG00000000792	2.93827	2.90987	2.85433	2.84763	2.81915	3.48567	3.61011	3.64637	3.60577	3.61948	3.44811	3.92872	3.90025	3.77828	4.04069	3.90399	3.85326	4.34058	4.59918	4.63433	4.62453	4.71984	4.48452	3.67676	3.52634	3.62127	3.63787	3.4473	3.42399	4.79294	4.89364	4.50629	4.60668	4.87778	4.65485	2.90082	2.83339	3.58072	3.55778	3.86908	3.93264	4.52469	4.60963	3.60812	3.50305	4.73096	4.7131	7.54502	-1.30722
ENSMUSG00000000794	7.95514	8.10577	8.14057	7.99062	8.08826	7.93661	8.03282	7.97836	8.01922	8.07871	8.06681	8.03137	8.39949	8.43457	8.26406	8.24299	8.31263	8.28667	8.32029	8.38456	8.27551	8.49502	8.38152	7.92422	7.91523	7.96203	7.93292	7.96691	8.02094	8.06055	8.09872	8.37429	7.97945	8.28017	8.2694	8.06716	8.03944	7.9826	8.05492	8.28848	8.27323	8.33051	8.38402	7.93383	7.97359	8.17785	8.17634	266.86	-0.0575241
ENSMUSG00000000804	8.86491	8.79081	8.83572	8.91026	8.82854	8.82945	8.84059	8.89592	8.95232	8.71962	8.64645	9.14523	8.93012	9.08533	9.10544	9.10054	9.09667	9.42724	9.25758	9.26875	9.43777	9.18787	9.22566	9.17729	9.09412	9.09203	9.16396	9.24927	9.09594	8.94319	8.99308	9.08668	8.94383	8.99027	8.84355	8.83048	8.8694	8.85532	8.7728	9.05356	9.10088	9.31785	9.28377	9.12115	9.16972	9.00765	8.92588	460.689	0.0699433
ENSMUSG00000000805	4.09859	4.06817	3.94677	4.07578	4.03274	4.79798	4.77004	4.80184	4.89376	4.83906	4.72519	5.07105	4.95967	4.94973	4.98785	5.14125	4.99831	5.44505	5.57268	5.70734	5.69019	5.76506	5.57564	5.55396	5.53635	5.80222	5.63789	5.38441	5.28912	6.08843	5.67922	5.77832	5.50123	5.66512	5.26577	4.03784	4.05426	4.78995	4.81933	4.99348	5.04247	5.57502	5.67696	5.63084	5.43714	5.84866	5.47737	16.7601	0.121949
ENSMUSG00000000811	5.57748	5.6449	5.60754	5.56484	5.56694	5.77423	5.51127	5.57503	5.65123	5.59834	5.70437	5.65807	5.56201	5.58162	5.65618	5.5866	5.53409	5.51232	5.48039	5.46687	5.35191	5.51332	5.47252	4.81493	5.1646	5.01376	5.04678	5.162	4.99705	4.95857	4.97942	4.87862	5.28145	5.00735	5.06305	5.60998	5.56589	5.62017	5.65131	5.60057	5.59229	5.48653	5.44592	4.99776	5.06861	4.93887	5.11729	48.3549	-0.176016
ENSMUSG00000000823	5.64535	5.54753	5.624	5.54375	5.52284	5.7684	5.85584	5.80571	5.63522	5.64798	5.80237	5.8999	5.80829	5.72469	5.75292	5.88101	5.70304	6.12662	5.96348	5.8428	6.15337	5.74401	5.91667	5.03727	5.13365	5.00358	5.3118	5.11091	5.18028	5.2469	5.0738	4.99227	4.8278	4.79659	4.95455	5.60563	5.5333	5.80998	5.69519	5.81096	5.77899	5.97763	5.93802	5.05817	5.201	5.10432	4.85964	47.9276	-0.296657
ENSMUSG00000000826	8.72253	8.75075	8.63154	8.67492	8.5637	9.06684	9.07069	8.95039	9.13626	9.07017	9.01086	9.31827	9.3293	9.12063	9.36594	9.18054	9.32084	9.53489	9.46892	9.43752	9.58378	9.43877	9.5101	9.41771	9.36099	9.33845	9.33128	9.31025	9.20031	9.28959	9.23972	9.25686	9.42319	9.46568	9.23774	8.70161	8.61931	9.02931	9.07243	9.25606	9.28911	9.48044	9.51088	9.37238	9.28062	9.26206	9.37554	408.344	-0.154964
ENSMUSG00000000827	8.21417	8.26375	8.26705	8.30378	8.26041	8.40561	8.46617	8.22509	8.46552	8.51443	8.54657	8.51741	8.72411	8.5978	8.48843	8.5432	8.65282	8.78478	8.56977	8.69702	8.57843	8.58883	8.7514	7.97901	8.14102	8.07256	7.90396	8.04062	8.14526	8.28728	8.06044	8.45855	8.35089	8.2975	8.45143	8.24832	8.28209	8.36562	8.50884	8.6131	8.56148	8.68386	8.63956	8.0642	8.02995	8.26876	8.36661	307.131	0.0644908
ENSMUSG00000000838	8.57033	8.48852	8.42265	8.57007	8.48019	8.62906	8.45297	8.51792	8.6357	8.21638	8.41565	8.7492	8.48458	8.64594	8.78066	8.6152	8.60028	9.23613	8.85676	8.86133	9.11568	8.55392	8.84046	8.60725	8.60432	8.64981	8.62783	8.54748	8.68181	8.49222	8.44186	8.38039	8.09927	8.19588	8.09565	8.49383	8.52513	8.53332	8.42258	8.62657	8.66538	8.98474	8.83669	8.62046	8.61904	8.43815	8.13026	364.526	0.0563949
ENSMUSG00000000861	6.56511	6.62213	6.22645	6.16955	6.15238	6.50794	6.4402	6.46611	6.45971	6.5229	6.16559	7.13876	6.83893	6.40822	6.7746	6.97913	6.97757	7.49322	7.73306	7.44235	7.73524	7.42533	7.38353	7.44747	7.20858	7.21442	7.47391	7.1909	6.78136	7.58592	7.58021	7.18645	7.27389	7.35692	7.19163	6.47123	6.16097	6.47141	6.38274	6.7953	6.91044	7.55621	7.5147	7.29016	7.14872	7.45086	7.27415	85.2856	-0.992158
ENSMUSG00000000876	6.77776	6.80142	7.19771	6.98516	7.23348	6.78709	6.76703	6.87422	6.67351	6.97127	7.07287	7.00504	7.37762	7.19777	7.02032	7.26236	7.16418	7.08958	7.04109	7.0376	6.95558	7.03635	7.0612	6.18096	6.28818	6.30004	6.13488	6.21948	6.49284	6.41341	6.44066	6.58629	6.20849	6.32446	6.25921	6.92563	7.10932	6.80945	6.90588	7.19347	7.14895	7.05609	7.01771	6.25639	6.2824	6.48012	6.26405	130.937	0.416328
ENSMUSG00000000881	7.33434	7.30682	7.29402	7.17734	7.17508	7.37655	7.6186	7.52779	7.39026	7.4678	7.26642	8.09416	7.72054	7.61663	7.8342	7.81235	7.66291	8.32605	8.31544	8.09877	8.63087	8.048	8.1559	7.76011	7.55654	7.67132	7.85864	7.65243	7.56424	8.15807	8.17394	7.82083	7.51681	7.55426	7.40863	7.31173	7.17621	7.50764	7.37483	7.81044	7.76982	8.24675	8.27826	7.66266	7.69177	8.05095	7.49324	153.674	-0.31831
ENSMUSG00000000884	3.34849	3.44258	3.42601	3.48496	3.38956	3.20178	3.17477	3.14127	3.09658	3.221	3.24515	3.4677	3.45254	3.54785	3.47725	3.57317	3.57789	3.36711	3.44679	3.41549	3.33424	3.28524	3.43767	2.40621	2.4362	2.37795	2.41199	2.47312	2.47622	2.79226	2.53625	2.72225	2.64348	2.71762	2.56309	3.40569	3.43726	3.17261	3.18758	3.48936	3.54277	3.4098	3.35238	2.40679	2.45378	2.68359	2.6414	10.8977	0.376622
ENSMUSG00000000889	3.67249	3.75208	3.57531	3.60202	3.60742	4.07955	3.96776	3.99874	4.08849	4.06959	3.78678	5.05233	5.18268	4.56994	5.00803	5.00129	5.4573	5.89762	5.83728	6.0062	5.44623	6.24255	6.26701	5.89354	5.60573	5.25713	6.20678	5.60196	5.50012	6.32708	6.25659	5.84912	6.03662	5.95899	6.04336	3.66662	3.60472	4.01535	3.98162	4.93499	5.15554	5.9137	5.98527	5.58547	5.76962	6.14426	6.01299	12.8106	-0.708542
ENSMUSG00000000901	4.11793	4.0737	4.12096	4.06808	4.13362	4.10515	4.1721	4.08778	4.07699	4.14855	4.17525	4.25786	4.41522	4.40611	4.27735	4.34851	4.4542	4.3131	4.44497	4.43027	4.34731	4.52288	4.53546	4.10182	4.11046	3.96173	4.07284	3.87869	4.0173	4.06517	4.24111	4.19701	4.23437	4.37362	4.42837	4.10419	4.10085	4.12168	4.1336	4.35973	4.36002	4.39611	4.46855	4.058	3.98961	4.16776	4.34546	17.0954	-0.0197537
ENSMUSG00000000902	9.0238	9.04657	9.06871	9.09531	8.95371	9.16104	9.24606	9.0183	9.14442	8.97587	9.17544	9.22598	9.0569	9.2609	9.20206	9.14145	9.0232	9.52362	9.24435	9.19457	9.41647	8.97691	9.30029	8.41497	8.55913	8.57566	8.54199	8.60639	8.82321	8.6637	8.41558	8.52381	8.38653	8.1336	8.24577	9.04636	9.02451	9.1418	9.09858	9.18126	9.12224	9.32085	9.23122	8.51659	8.6572	8.53436	8.2553	526.453	-0.0380748
ENSMUSG00000000915	7.98812	8.06076	8.13788	8.03642	8.0062	8.05463	8.29686	8.10174	8.2682	8.27188	8.3579	8.22322	8.53013	8.36344	8.23617	8.32793	8.35567	8.47688	8.37128	8.47056	8.45455	8.40942	8.49488	7.62884	7.69837	7.62596	7.72748	7.80144	8.0447	7.82977	7.83705	8.00359	8.151	8.09824	8.22537	8.06225	8.02131	8.15108	8.29933	8.37227	8.30659	8.43957	8.45295	7.65106	7.85787	7.89014	8.15821	264.775	-0.0875339
ENSMUSG00000000916	3.43422	3.41813	3.43832	3.39692	3.47185	3.56282	3.58822	3.64707	3.52	3.61519	3.6744	3.55656	3.87481	3.81119	3.78863	3.89799	3.79646	4.02203	3.9613	4.00413	3.95568	4.03541	4.03921	3.12916	3.21312	3.30176	3.16938	3.20791	3.33315	2.99589	3.00611	3.13015	2.83655	3.03819	3.02388	3.43023	3.43438	3.59937	3.6032	3.74752	3.82769	3.99582	4.0101	3.21468	3.23681	3.04405	2.96621	10.6928	0.0658468
ENSMUSG00000000934	4.65171	4.66918	4.61662	4.51079	4.68189	4.558	4.79733	4.78975	4.82288	4.83741	4.81453	4.66279	4.65654	4.7752	4.79372	4.75403	4.69496	4.57219	4.41941	4.57677	4.60718	4.61828	4.46736	4.14889	4.30475	4.28274	4.1449	4.3505	4.32338	4.27073	4.26617	4.27619	4.72905	4.5412	4.37651	4.64584	4.59634	4.71502	4.82494	4.69818	4.74757	4.52279	4.56427	4.24546	4.27293	4.27103	4.54892	24.6999	-0.277575
ENSMUSG00000000942	NA	NA	NA	NA	NA	NA	NA	NA	NA	NA	NA	NA	NA	NA	NA	NA	NA	1.77228	1.6828	1.84533	1.75641	1.77597	1.94702	NA	NA	NA	NA	NA	NA	NA	NA	NA	NA	NA	NA	NA	NA	NA	NA	NA	NA	1.76681	1.82646	NA	NA	NA	NA	NA	NA
ENSMUSG00000000948	NA	NA	NA	NA	NA	NA	NA	NA	NA	NA	NA	1.80063	1.657	1.64608	1.84734	1.62396	1.61615	NA	NA	NA	NA	NA	NA	NA	NA	NA	NA	NA	NA	NA	NA	NA	NA	NA	NA	NA	NA	NA	NA	1.70124	1.69582	NA	NA	NA	NA	NA	NA	NA	NA
ENSMUSG00000000957	9.14438	9.07711	9.08546	9.11683	9.06617	9.12075	9.05111	8.855	9.09055	9.06766	9.20653	9.25759	9.6782	9.43015	9.37895	9.41648	9.51241	9.63518	9.46254	9.69166	9.57293	10.0391	9.90459	9.69679	9.50877	9.42526	9.62759	9.29697	9.70643	9.06832	9.31059	9.64401	9.27074	9.26907	9.57298	9.10232	9.0915	9.00895	9.12158	9.45531	9.43595	9.59646	9.83888	9.54361	9.54366	9.34098	9.37093	548.339	-0.0205576
ENSMUSG00000000958	2.61124	2.57789	2.58829	2.62063	2.56373	2.61007	2.60821	2.57026	2.6649	2.60481	2.58047	2.65884	2.80652	2.67455	2.64158	2.67252	2.67347	3.47517	3.31368	3.31588	3.2951	3.38461	3.40162	2.66066	2.6002	2.6441	2.59686	2.55279	2.77318	2.54166	2.50976	2.45843	2.41325	2.52051	2.60183	2.59247	2.59218	2.59618	2.61672	2.7133	2.66252	3.36824	3.36044	2.63499	2.64094	2.50328	2.51186	6.13054	-0.0103728
ENSMUSG00000000959	7.71447	7.72567	7.83794	7.65005	7.83444	7.62237	7.71595	7.72519	7.68794	7.77816	7.93128	7.80472	7.85742	8.00665	7.75725	7.88241	7.82847	7.97407	7.86898	7.77796	7.88446	7.75534	7.86745	7.0664	7.26778	7.0378	7.15152	7.17069	7.18713	7.53144	7.28198	7.51349	7.3199	7.37268	7.33653	7.75936	7.74225	7.68783	7.79912	7.8896	7.82271	7.87367	7.83575	7.12399	7.16978	7.4423	7.34304	216.111	-0.0268421
ENSMUSG00000000976	6.01801	6.10088	6.23193	6.14957	6.16387	6.01928	6.08904	6.20649	6.18344	6.14232	6.2155	6.31281	6.26753	6.59431	6.43296	6.47857	6.28842	6.22738	6.13217	6.12139	6.02735	6.11398	6.09539	5.30221	5.45852	5.41937	5.60703	5.55564	5.48258	5.70674	5.54721	6.07864	5.56943	5.68716	5.83289	6.11694	6.15672	6.10494	6.18042	6.39155	6.39998	6.16031	6.07891	5.39337	5.54842	5.77753	5.69649	70.3948	0.11345
ENSMUSG00000000983	NA	NA	NA	NA	NA	NA	NA	NA	NA	NA	NA	1.88207	1.77287	1.76299	1.81473	1.76921	1.89116	2.47673	2.50931	2.3516	2.44936	2.53179	2.41447	NA	NA	NA	NA	NA	NA	NA	NA	NA	NA	NA	NA	NA	NA	NA	NA	1.80598	1.82503	2.44588	2.46521	NA	NA	NA	NA	NA	NA
ENSMUSG00000001016	8.14905	8.01939	8.07154	8.03285	8.05216	8.24016	8.42161	8.31328	8.29143	8.13908	8.27725	8.40957	8.22719	8.30303	8.31889	8.30313	8.2123	8.51821	8.44938	8.34435	8.54179	8.08377	8.41577	7.59529	7.70757	7.65269	7.63051	7.67442	7.67012	7.91911	7.70407	7.62172	7.86524	7.66965	7.77906	8.07999	8.04251	8.32502	8.23592	8.31326	8.27811	8.43731	8.34711	7.65185	7.65835	7.7483	7.77132	268.153	-0.0775913
ENSMUSG00000001017	8.6242	8.73517	8.57984	8.64697	8.63348	8.67992	8.54807	8.67375	8.69941	8.52822	8.57388	8.97282	8.90435	8.91097	8.9634	8.86344	8.86061	9.10366	8.97416	8.89305	9.02688	8.99582	8.89391	8.68178	8.72996	8.66977	8.66301	8.70552	8.59784	8.71464	8.62783	8.59911	8.56286	8.50626	8.57058	8.6464	8.64022	8.63392	8.6005	8.92938	8.89582	8.99029	8.9722	8.69384	8.65546	8.64719	8.54657	400.776	-0.0147511
ENSMUSG00000001018	8.05729	8.04883	8.11326	8.1577	8.14019	7.91674	8.04556	7.98738	7.98709	8.13151	8.15763	8.26361	8.53428	8.3757	8.32919	8.33546	8.42739	8.2892	8.15622	8.27297	8.1381	8.29123	8.43939	8.01382	8.05477	7.92438	7.92246	7.91931	8.01429	8.34301	8.18704	8.3696	8.42862	8.65943	8.52024	8.07313	8.14895	7.98323	8.09208	8.3912	8.36401	8.23947	8.28957	7.99766	7.95202	8.29988	8.5361	275.296	0.149234
ENSMUSG00000001025	8.70303	8.8116	8.60455	8.75895	8.62435	8.58878	8.65614	8.53013	8.60763	8.59215	8.46924	8.82199	8.7375	8.86099	8.95947	8.82308	8.87148	8.87387	8.8457	8.88838	8.63516	8.82805	8.79554	8.55209	8.63557	8.77067	8.52059	9.68173	9.24988	8.82143	8.94216	8.91068	12.1451	12.0529	12.1361	8.70639	8.69165	8.59168	8.55634	8.80683	8.88468	8.86932	8.75292	8.65278	9.15073	8.89142	12.1114	417.92	-0.0311786
ENSMUSG00000001034	4.51504	4.56233	4.45516	4.58304	4.50603	4.42079	4.54745	4.43666	4.43806	4.52319	4.58943	4.68991	4.71532	4.72809	4.4808	4.65723	4.69688	4.41547	4.5728	4.28638	4.45788	4.58399	4.42034	4.03588	4.05628	4.07305	4.08087	4.22663	4.20486	4.69051	4.4115	4.46156	4.55138	4.45184	4.45859	4.51085	4.54453	4.4683	4.51689	4.71111	4.61163	4.42488	4.4874	4.05507	4.17079	4.52119	4.48727	23.2621	0.213298
ENSMUSG00000001036	8.0893	8.11259	8.23726	8.1895	8.23519	8.41237	8.44598	8.47008	8.39466	8.48613	8.49996	8.5294	8.58217	8.59517	8.4421	8.53002	8.42481	8.74318	8.73141	8.70363	8.76049	8.56445	8.74092	7.81872	7.94777	8.05435	7.93463	8.06221	8.02504	8.18064	8.1065	8.20021	8.03828	7.75001	7.93057	8.14638	8.21235	8.44281	8.46025	8.56891	8.46564	8.72607	8.68862	7.94028	8.00729	8.16245	7.90629	289.067	0.126576
ENSMUSG00000001039	6.31021	6.41755	6.45251	6.38397	6.38593	6.30235	6.12081	6.3119	6.16289	6.2913	6.21548	6.48355	6.52462	6.38205	6.18271	6.56247	6.43203	6.54229	6.70026	6.71171	6.41762	6.59723	6.74425	5.67707	5.8689	5.78004	5.71372	5.85441	5.98515	6.24847	6.19846	6.20322	6.36584	6.4272	6.77839	6.39342	6.38495	6.24502	6.22322	6.46341	6.3924	6.65142	6.58636	5.77534	5.85109	6.21672	6.52381	84.0143	-0.0306583
ENSMUSG00000001052	6.64996	6.70485	6.81551	6.7698	6.82836	7.00221	7.07972	7.04538	6.96783	6.93147	7.14388	7.27147	7.12779	7.18549	7.30373	7.19243	7.09118	7.75633	7.30447	7.40764	7.69886	7.21685	7.38963	6.82084	6.81256	6.93794	6.87347	6.77576	6.89079	7.20657	6.99679	6.95606	6.95591	6.71645	6.99399	6.72344	6.79908	7.04243	7.01439	7.19492	7.19578	7.48948	7.43511	6.85711	6.84667	7.05314	6.88879	108.106	0.193879
ENSMUSG00000001053	4.93718	4.85212	4.98388	4.94719	5.01337	4.69513	4.77925	4.98901	4.90166	4.79665	4.94589	4.77072	4.75178	4.89702	4.7331	4.7641	4.67607	4.78545	5.09976	5.14438	5.03309	5.19316	5.09159	3.46051	3.55023	3.47868	3.59502	3.52636	3.63905	4.07141	3.88749	3.79429	3.73893	3.78694	3.56774	4.92439	4.98028	4.82113	4.8814	4.80651	4.72442	5.00986	5.10595	3.49647	3.58681	3.91773	3.69787	30.7774	0.287362
ENSMUSG00000001054	7.17613	7.13693	7.33536	7.08215	7.16272	6.86763	6.99233	6.9566	6.93912	6.99876	7.04569	7.11121	7.2591	7.13854	7.05225	7.24933	7.03929	7.08185	7.1872	7.11556	7.01084	6.98192	7.13933	6.32823	6.36295	6.33154	6.22087	6.47161	6.50274	6.65382	6.65309	6.63767	6.66249	6.44214	6.77421	7.21614	7.12244	6.93886	6.99452	7.16961	7.11362	7.1282	7.04403	6.34091	6.39841	6.64819	6.62628	145.538	-0.228219
ENSMUSG00000001056	6.00986	5.97253	6.03706	5.94108	6.01356	6.07539	6.09906	6.08154	6.02304	6.09839	6.15355	6.39325	6.4032	6.45148	6.30601	6.43205	6.44751	6.42705	6.45195	6.35464	6.4565	6.61882	6.40229	6.13553	6.13203	6.15031	6.13879	6.21246	6.20395	6.49298	6.40636	6.28357	6.7894	6.78287	6.82012	6.00648	5.97732	6.08533	6.09166	6.41598	6.39519	6.41121	6.49253	6.13929	6.18507	6.39431	6.79746	63.73	-0.0941532
ENSMUSG00000001062	4.70749	4.73435	4.76301	4.63364	4.80164	5.04556	5.10247	5.02314	5.22961	5.14995	5.03212	5.24408	5.19744	5.00048	5.01014	5.13432	5.13226	5.0399	5.29508	5.15838	5.17908	5.10979	5.11368	4.79344	4.84706	5.11388	4.78501	5.05429	4.91095	5.1176	5.06177	5.00029	5.02628	4.86761	5.0941	4.73495	4.71764	5.05706	5.13723	5.14733	5.09224	5.16445	5.13418	4.91813	4.91675	5.05988	4.996	26.4086	-0.0747377
ENSMUSG00000001065	3.89178	3.89078	3.94918	3.86011	3.89695	4.08104	4.08486	4.10344	4.13739	4.0617	4.22708	3.87519	4.14156	3.96222	3.96736	3.97652	3.88324	3.9122	3.9851	3.76054	3.79989	3.90706	3.80731	2.9249	2.90816	3.04988	3.03724	2.92432	2.92951	3.25753	3.24507	3.41534	3.16773	3.21283	3.22609	3.91058	3.87853	4.08978	4.14206	3.99299	3.94237	3.88595	3.83808	2.96098	2.96369	3.30598	3.20222	14.8777	-0.299248
ENSMUSG00000001082	5.02849	5.17375	5.17231	5.06688	5.22063	5.1798	5.19668	5.10005	5.08198	5.26267	5.12155	5.68664	6.10488	5.57552	5.57463	5.66468	5.69324	5.43723	5.61739	5.96607	5.59586	6.05468	5.78362	5.64003	5.28403	5.44072	5.40006	5.41941	5.48424	5.38514	5.37418	5.32633	5.59232	5.73129	5.87947	5.12485	5.14376	5.15884	5.1554	5.78901	5.64418	5.67356	5.81138	5.45492	5.43457	5.36189	5.73436	35.106	0.0987307
ENSMUSG00000001089	7.35502	7.47851	7.23744	7.32127	7.14888	7.53585	7.33347	7.5699	7.61317	7.43137	7.38422	7.85229	7.66903	7.81454	7.98907	7.7085	7.80055	8.2817	8.15577	7.95183	8.41823	7.97413	7.96425	7.8753	7.90309	7.82109	7.89482	7.86354	7.77024	8.05161	7.97013	7.99581	7.64001	7.41199	7.10914	7.35699	7.23508	7.47974	7.47626	7.77862	7.83271	8.12977	8.11887	7.86649	7.84287	8.00585	7.38705	160.472	-0.2879
ENSMUSG00000001098	6.9472	6.91832	6.88346	6.75	6.75061	7.02847	7.16153	7.02465	7.07503	7.06092	6.98938	7.29433	7.06169	7.24125	7.43528	7.21933	7.11584	7.445	7.57157	7.28449	7.48689	7.29448	7.38698	6.73763	6.89857	6.7058	6.98986	7.09081	7.0633	7.25496	6.90912	7.06852	7.76066	7.60359	7.7641	6.91632	6.75031	7.07155	7.04178	7.19909	7.25682	7.43369	7.38945	6.78067	7.04799	7.07754	7.70945	116.195	-0.432748
ENSMUSG00000001100	7.85177	7.88427	7.89703	7.84172	7.96658	7.88977	8.10594	7.9069	8.03855	8.03278	8.17551	8.17771	8.23918	8.15501	8.0916	8.09041	8.0637	7.86205	7.82188	7.7338	7.73611	7.77127	8.00453	7.27468	7.38375	7.32536	7.18728	7.33772	7.23668	7.61498	7.48287	7.62533	7.75503	7.73907	7.56868	7.87769	7.90415	7.96754	8.08228	8.19064	8.0819	7.80591	7.8373	7.32793	7.25389	7.57439	7.68759	237.019	0.0615107
ENSMUSG00000001105	6.58155	6.67285	6.6279	6.7603	6.59009	6.6136	6.28868	6.50071	6.47574	6.52726	6.47888	6.98315	7.05606	6.88331	7.07079	6.90391	7.08278	7.2596	7.17198	7.05252	7.04301	7.24555	7.03009	7.02213	6.95291	6.98395	7.02435	7.0732	6.79127	7.13535	7.14062	7.11516	7.05965	6.92967	7.26565	6.62743	6.6752	6.46766	6.49396	6.97417	7.01916	7.16136	7.10621	6.98633	6.96294	7.13037	7.08499	100.807	0.130485
ENSMUSG00000001119	3.88333	3.97425	3.71596	3.86786	3.74759	4.19828	4.09832	4.20369	4.08431	3.99467	3.98854	4.64181	4.5035	4.41595	4.48601	4.45506	4.55161	4.80711	5.35955	5.11431	5.23845	5.38798	5.05007	5.69737	5.42082	5.45934	5.78329	5.34754	5.12929	6.03295	6.56298	6.35275	7.30358	7.37443	7.69647	3.85784	3.80772	4.16676	4.02251	4.52042	4.49756	5.09366	5.2255	5.52584	5.42004	6.31623	7.45816	15.0634	-0.509679
ENSMUSG00000001120	6.58988	6.5715	6.42354	6.30638	6.41996	6.89218	6.69738	6.55407	6.62755	6.70285	6.54301	6.76061	6.50408	6.51276	6.55422	6.69139	6.70868	6.96883	7.06994	6.97156	7.14179	6.7854	6.93242	6.87044	6.51462	6.5879	6.50537	6.62331	6.51103	6.69108	6.93688	6.59391	6.92106	7.02013	6.95261	6.52831	6.36317	6.71455	6.62447	6.59248	6.65143	7.00345	6.9532	6.65765	6.54657	6.74062	6.9646	89.1649	-0.476957
ENSMUSG00000001123	2.45663	2.51189	2.47263	2.46207	2.51002	3.17631	3.21662	3.16086	3.10714	3.14283	3.21126	3.26866	3.17227	3.18039	3.26057	3.33275	3.27035	3.23981	3.45198	3.31589	3.32027	3.52644	3.3328	3.77567	3.77504	3.93636	3.85025	4.27816	4.53579	4.28941	4.3028	4.18102	4.87212	4.71421	5.13172	2.48038	2.48605	3.1846	3.15374	3.20711	3.28789	3.3359	3.39317	3.82902	4.2214	4.25775	4.90602	5.55547	0.131834
ENSMUSG00000001127	8.69492	8.78183	8.69879	8.68875	8.75021	8.8732	8.90451	8.74123	8.7276	8.91981	8.77722	8.92706	9.25543	8.93753	8.9799	9.04853	9.08392	8.98058	9.16091	9.28511	8.98185	9.36301	9.24679	8.70048	8.65743	8.58538	8.57154	8.61851	8.48808	8.82172	8.98625	8.92786	9.11314	9.04929	9.09847	8.72518	8.71948	8.83965	8.80821	9.04001	9.03745	9.1422	9.19722	8.64776	8.55938	8.91194	9.08697	422.836	-0.00935849
ENSMUSG00000001131	2.81487	2.85785	2.8828	2.82189	2.85301	3.06848	2.94908	3.04936	3.00256	3.01886	3.11313	2.76492	2.91125	2.83243	2.72142	2.80958	2.77802	3.31643	3.27608	3.12604	3.27503	3.91979	3.34088	4.7809	4.68609	4.74185	4.77124	6.49531	6.16071	5.53372	5.66028	5.41048	8.65578	8.69135	8.93128	2.85184	2.83745	3.02231	3.04485	2.8362	2.76967	3.23952	3.5119	4.73628	5.80909	5.53483	8.75947	7.16071	-0.254352
ENSMUSG00000001134	3.56908	3.66085	3.66866	3.58066	3.60988	3.67901	3.74044	3.68699	3.58686	3.76442	3.7367	3.81479	4.03265	3.8871	3.83527	3.91767	3.88642	3.85021	3.75326	3.80899	3.74078	3.72911	3.68216	3.34771	3.21077	3.3757	3.3168	3.29902	3.18963	3.53515	3.45687	3.72329	3.69375	3.52039	3.93427	3.63286	3.59527	3.70215	3.69599	3.91151	3.87979	3.80415	3.71735	3.31139	3.26848	3.57177	3.71614	12.3215	-0.424153
ENSMUSG00000001138	7.73586	7.79878	7.75924	7.78391	7.81868	7.55911	7.61924	7.51355	7.56335	7.68863	7.69135	7.80624	7.98989	7.96921	7.86411	7.85852	7.88392	7.7787	7.82141	8.03099	7.67933	8.27326	7.94185	7.74499	7.63733	7.55813	7.68191	7.49207	7.79307	7.47637	7.59388	7.75193	7.36967	7.60753	7.73289	7.76463	7.8013	7.56397	7.64777	7.92178	7.86885	7.87703	7.96481	7.64682	7.65568	7.60739	7.57003	219.75	0.0780257
ENSMUSG00000001143	7.07247	7.17383	7.22926	7.16396	7.31245	7.28614	7.3078	7.38283	7.40376	7.66404	7.3048	7.75175	7.98563	7.72224	7.81072	7.80106	7.81401	7.83093	8.03235	8.05538	7.85779	8.23511	8.12917	7.92783	7.63635	7.72378	7.86143	7.59922	7.57924	7.74189	7.98624	7.93023	7.34413	7.55314	8.05022	7.15852	7.23821	7.32559	7.45754	7.81987	7.8086	7.97289	8.07402	7.76265	7.67996	7.88612	7.64916	146.439	0.19294
ENSMUSG00000001150	6.21436	6.11664	6.24857	6.14221	6.27315	6.34533	6.35963	6.55738	6.50256	6.42132	6.53696	6.88546	6.64604	6.74872	6.76103	6.73164	6.74685	6.84175	6.89226	6.89537	7.02353	6.53052	6.72069	6.09974	6.09102	6.129	6.27683	6.20084	6.05168	6.5731	6.41686	6.34002	6.37481	6.19804	6.30589	6.19319	6.20768	6.42078	6.48694	6.76007	6.74651	6.87646	6.75824	6.10659	6.17645	6.44333	6.29291	73.4589	0.0514856
ENSMUSG00000001151	6.22929	6.24189	6.2462	6.26173	6.12452	6.41096	6.28982	6.25759	6.34269	6.33656	6.42212	6.57567	6.68558	6.61317	6.56153	6.53367	6.44021	6.6917	6.4491	6.54998	6.69508	6.59404	6.57281	6.25311	6.36477	6.38193	6.29255	6.39693	6.2762	6.43053	6.11361	6.39512	6.4589	6.27227	6.12661	6.23912	6.19312	6.31946	6.36712	6.62481	6.5118	6.56359	6.62064	6.33327	6.3219	6.31309	6.28593	74.9991	-0.144472
ENSMUSG00000001156	6.00128	6.17521	6.0159	6.03295	6.05018	6.04757	6.1114	6.09275	6.07718	6.17871	6.21853	6.46824	6.57628	6.48342	6.55245	6.36452	6.49239	6.56828	6.358	6.44412	6.54992	6.41527	6.41317	6.266	6.07322	6.04801	6.01422	6.04373	6.0644	6.43832	6.54257	6.38162	6.1841	6.34337	6.15425	6.06413	6.04156	6.0839	6.15814	6.50931	6.46979	6.4568	6.45945	6.12908	6.04078	6.45417	6.22724	66.8538	-0.0814686
ENSMUSG00000001157	5.7681	5.82765	5.76323	5.84483	5.76949	5.83469	5.65886	5.79555	5.72082	5.69568	5.49587	5.9815	5.81301	5.91856	5.99113	5.9942	5.98234	6.09884	6.33001	6.28013	6.05614	6.27055	6.15076	6.35119	6.21577	6.36301	6.41224	6.27605	6.31622	6.27055	6.30442	6.14659	6.22013	6.52688	6.29434	5.78633	5.80716	5.76303	5.63746	5.90436	5.98923	6.23633	6.15915	6.30999	6.33484	6.24052	6.34712	55.7189	0.0730766
ENSMUSG00000001158	7.37148	7.44671	7.32957	7.47465	7.2485	7.23609	7.27542	7.33013	7.49109	7.39726	7.38085	7.53045	7.67028	7.84517	7.68694	7.58755	7.6585	7.83013	7.78757	7.74233	7.63312	7.82547	7.86147	7.4447	7.60526	7.46979	7.51494	7.6541	7.579	7.63118	7.76734	7.77201	7.70428	7.77008	7.76374	7.38259	7.36157	7.28055	7.42307	7.68197	7.64433	7.78668	7.77335	7.50658	7.58268	7.72351	7.74603	167.136	-0.0421709
ENSMUSG00000001166	NA	NA	NA	NA	NA	NA	NA	NA	NA	NA	NA	NA	NA	NA	NA	NA	NA	NA	NA	NA	NA	NA	NA	NA	NA	NA	NA	NA	NA	2.02892	2.12153	1.96574	2.1845	2.03495	2.10709	NA	NA	NA	NA	NA	NA	NA	NA	NA	NA	2.03873	2.10884	NA	NA
ENSMUSG00000001173	7.28449	7.27179	7.23617	7.23121	7.15727	7.50115	7.27052	7.37216	7.38004	7.11353	6.95048	7.77206	7.48708	7.53691	7.7021	7.53609	7.43973	7.96536	7.8745	7.90492	7.93781	7.84683	7.66335	7.7728	7.75507	7.7183	7.77043	7.77529	7.71102	7.58383	7.68427	7.96392	7.5952	7.79159	7.6607	7.26415	7.19424	7.38128	7.14802	7.59868	7.55931	7.91493	7.816	7.74872	7.75225	7.74401	7.6825	151.187	-0.166006
ENSMUSG00000001175	13.1061	13.0325	12.7436	12.964	12.6782	13.117	12.8477	12.9449	13.1032	12.8175	12.6458	13.4467	13.1442	13.1532	13.3657	13.3021	13.3625	13.8118	13.7321	13.5712	13.8274	13.7135	13.5909	13.6398	13.6539	13.6132	13.6995	13.6941	13.3136	13.7264	13.6532	13.5184	13.6862	13.5316	13.3511	12.9607	12.8211	12.9699	12.8555	13.2481	13.3434	13.705	13.7106	13.6356	13.5691	13.6327	13.523	7779.73	-0.225471
ENSMUSG00000001211	10.5151	10.5846	10.7667	10.6009	10.779	10.5097	10.5527	10.4869	10.4387	10.6527	10.6972	10.4715	10.8628	10.8087	10.5916	10.691	10.6409	10.49	10.6219	10.8397	10.5785	10.8401	10.7799	10.4264	10.3514	10.2905	10.3649	10.1555	10.423	10.1246	10.3953	10.6271	10.031	10.2724	10.4154	10.6221	10.69	10.5164	10.5962	10.7143	10.6411	10.6505	10.7328	10.3561	10.3145	10.3824	10.2396	1615.29	0.109942
ENSMUSG00000001225	2.39025	2.35589	2.35751	2.38502	2.38227	2.24742	2.2041	2.25063	2.23445	2.25803	2.23731	2.84922	2.99913	2.88836	2.95689	2.93417	3.02555	2.90055	2.72084	2.94109	2.78176	2.86298	2.77338	3.05735	3.06973	2.94302	2.97325	2.89447	2.90443	2.28467	2.22423	2.20577	2.05892	2.06526	2.04812	2.36788	2.38364	2.23405	2.24327	2.91223	2.9722	2.85416	2.80604	3.02337	2.92405	2.23823	2.05743	5.18697	0.363106
ENSMUSG00000001227	6.38389	6.33588	6.31065	6.2782	6.23229	6.32359	6.5108	6.47553	6.44322	6.58736	6.3199	7.19847	7.11985	6.49179	6.85891	7.06319	7.04071	7.08301	7.63645	7.70103	7.54321	7.99467	7.45973	7.54476	7.27353	7.36964	7.55447	7.11207	6.96674	7.6359	7.99223	7.47816	7.62166	7.79212	7.58444	6.34347	6.25524	6.43664	6.45016	6.9367	6.9876	7.4735	7.66587	7.39598	7.21109	7.7021	7.66607	79.6123	-0.272417
ENSMUSG00000001228	NA	NA	NA	NA	NA	NA	NA	NA	NA	NA	NA	NA	NA	NA	NA	NA	NA	NA	NA	NA	NA	NA	NA	NA	NA	NA	NA	NA	NA	1.66726	1.5701	1.74309	1.63222	1.70687	1.74708	NA	NA	NA	NA	NA	NA	NA	NA	NA	NA	1.66015	1.69539	NA	NA
ENSMUSG00000001229	6.25014	6.31048	6.35867	6.27974	6.40716	6.40871	6.62229	6.56895	6.57709	6.55177	6.46806	6.66926	6.66064	6.71689	6.49202	6.67231	6.64514	6.83159	7.11508	7.03123	7.03327	6.75442	6.96692	6.25052	6.4548	6.47159	6.39222	6.41531	6.11701	6.3675	6.36867	6.32548	6.07567	6.17243	6.53633	6.30643	6.34345	6.53332	6.5323	6.68226	6.60316	6.99263	6.9182	6.3923	6.30818	6.35389	6.26147	79.9522	0.118397
ENSMUSG00000001240	7.38809	7.3341	7.56771	7.36015	7.4803	7.33053	7.21917	7.40056	7.38723	7.28219	7.35986	7.41197	7.84812	7.78512	7.56175	7.65125	7.70852	7.66823	7.69395	8.05864	7.50266	8.01249	7.80055	7.17629	7.15814	7.29797	7.30204	7.10287	7.25909	7.71372	7.72292	8.05053	7.7552	7.69204	7.66766	7.42997	7.42023	7.31675	7.34309	7.68174	7.64051	7.80694	7.7719	7.2108	7.22134	7.82906	7.70496	172.621	-0.027303
ENSMUSG00000001247	NA	NA	NA	NA	NA	1.87026	1.95321	1.90447	1.88249	1.91317	1.97278	NA	NA	NA	NA	NA	NA	1.59093	1.67142	1.71655	1.63003	1.79172	1.77458	NA	NA	NA	NA	NA	NA	2.25461	2.07164	2.23615	2.05548	2.13225	2.34343	NA	NA	1.90931	1.92281	NA	NA	1.65964	1.73211	NA	NA	2.18747	2.17706	NA	NA
ENSMUSG00000001248	6.87434	6.89774	6.94392	6.80887	7.04206	6.99599	7.06452	6.93646	6.89152	7.00729	6.87341	7.18335	7.23606	7.12277	7.11207	7.28972	7.26933	7.25256	7.38483	7.38396	7.26622	7.31091	7.38357	6.74418	6.74425	6.7428	6.78351	6.79272	6.81297	7.0323	7.02093	6.73672	6.83393	6.9361	6.99073	6.90533	6.92546	6.99899	6.92407	7.18073	7.22371	7.34045	7.32023	6.74374	6.7964	6.92999	6.92025	120.755	0.0726173
ENSMUSG00000001260	11.4179	11.3173	11.2903	11.5879	11.3295	11.5282	11.2866	11.3127	11.4278	11.1911	11.2758	11.4954	11.568	11.7274	11.7095	11.564	11.6914	11.9611	11.689	11.8944	11.7341	12.021	11.8696	11.9763	11.9365	11.8877	11.9387	11.5466	11.9747	11.3625	11.5915	11.8078	10.996	11.0202	11.0181	11.3418	11.4587	11.3758	11.2982	11.5969	11.655	11.8482	11.8749	11.9335	11.82	11.5873	11.0115	2698.73	0.198966
ENSMUSG00000001270	12.9827	13.0685	13.4827	13.1305	13.358	13.1066	13.4831	13.2203	13.1856	13.3477	13.5914	13.228	13.443	13.4245	13.2107	13.3114	13.1979	13.442	13.1943	13.2693	13.2655	13.0436	13.5056	11.9304	12.1772	12.2499	12.07	12.0368	12.5975	12.4387	12.4088	12.5027	12.3152	12.219	12.4964	13.178	13.2443	13.27	13.3749	13.3652	13.24	13.3019	13.2715	12.1192	12.2348	12.4501	12.3435	9614.7	0.0778557
ENSMUSG00000001280	8.2833	8.34936	8.36415	8.51491	8.38807	8.45258	8.31368	8.31547	8.4553	8.37314	8.50529	8.45827	8.81469	8.65753	8.65437	8.58648	8.76029	8.77648	8.51396	8.70245	8.64476	8.77096	8.73795	8.2229	8.27242	8.25454	8.19348	8.05641	8.2615	8.3659	8.31166	8.57599	8.04441	8.16511	8.14166	8.33227	8.45149	8.36058	8.44458	8.6435	8.66705	8.6643	8.71789	8.24995	8.17046	8.41785	8.11706	334.438	0.227867
ENSMUSG00000001285	6.20353	6.13614	6.30374	6.06691	6.20583	6.24998	6.45296	6.35781	6.30877	6.28361	6.44616	6.39824	6.60122	6.60127	6.5106	6.49479	6.5099	6.26338	6.60043	6.30502	6.40119	6.39996	6.55136	5.44545	5.38173	5.51333	5.46736	5.4762	5.38269	6.03537	5.94852	5.9984	5.71108	5.84004	5.91228	6.21447	6.13637	6.35358	6.34618	6.53358	6.5051	6.38961	6.45084	5.44683	5.44208	5.9941	5.82113	72.8984	-0.243591
ENSMUSG00000001288	4.2275	4.24031	4.25007	4.18913	4.29246	4.26909	4.44034	4.46465	4.43566	4.56819	4.51713	4.75302	4.77848	4.67967	4.77247	4.73255	4.73909	4.37771	4.55534	4.54711	4.37964	4.33919	4.5005	3.69367	3.74301	3.80272	3.85205	3.88253	3.82993	4.62248	4.49094	4.61459	4.84993	4.97198	4.68247	4.2393	4.2408	4.39136	4.50699	4.73706	4.74804	4.49339	4.40644	3.74647	3.85483	4.57601	4.83479	18.7856	0.0290353
ENSMUSG00000001289	8.20596	8.20566	8.16585	8.19252	8.15433	8.16786	8.26227	8.2175	8.26274	8.43009	8.51408	8.40145	8.59619	8.6369	8.49381	8.44605	8.58667	8.63343	8.40378	8.45867	8.42102	8.45316	8.45521	7.89321	7.94605	7.86019	7.94021	8.08093	7.90158	8.30916	8.15962	8.33545	8.30901	8.29331	8.4054	8.19249	8.17342	8.21588	8.4023	8.54485	8.50884	8.49863	8.44313	7.89982	7.97424	8.26808	8.3359	291.18	-0.0384859
ENSMUSG00000001300	7.58932	7.55681	7.4671	7.69265	7.70554	7.57917	7.4376	7.64978	7.60373	7.58439	7.47273	7.87387	7.93949	7.73241	7.96745	7.98979	7.87571	7.97655	8.25337	8.31793	8.18892	8.49515	8.32182	8.38366	8.28371	8.45069	8.41567	8.10023	8.1892	8.21468	8.35221	8.27436	7.67772	7.45016	7.59297	7.53774	7.69909	7.55552	7.55362	7.84859	7.94432	8.18262	8.3353	8.37269	8.23503	8.28042	7.57361	195.31	0.345948
ENSMUSG00000001305	4.76248	4.75971	4.82184	4.74858	4.69889	4.91037	4.8825	5.03785	4.88687	5.00134	5.0734	5.08097	5.24141	5.18425	5.25773	5.21303	5.30995	5.24181	4.98804	4.98304	5.02705	4.91754	5.13701	4.764	4.72127	4.81584	4.7873	4.87992	4.67576	5.14179	5.23193	5.18591	5.31876	5.42021	5.21963	4.78134	4.72374	4.94357	4.9872	5.16888	5.26023	5.07097	5.0272	4.76704	4.78099	5.18654	5.31953	27.2251	-0.347074
ENSMUSG00000001313	7.24004	7.46098	7.59537	7.35182	7.53696	7.50091	7.71864	7.53829	7.59748	7.76641	7.8392	7.37893	7.87444	7.61863	7.37318	7.62254	7.52115	7.30368	7.4153	7.70676	7.13889	7.5305	7.76211	6.58903	6.55095	6.74517	6.55299	6.59204	6.72027	6.84936	6.83024	7.14138	7.32141	7.09403	7.25737	7.43213	7.44439	7.58595	7.73436	7.624	7.50563	7.47525	7.47717	6.62838	6.62177	6.94033	7.22427	174.948	0.0160049
ENSMUSG00000001323	7.9596	7.99261	7.84589	7.85305	7.79173	8.05485	7.78082	7.83876	7.94022	7.87489	7.67918	8.32415	8.18297	7.99285	8.29051	8.22574	8.23334	8.54788	8.66699	8.52846	8.66436	8.63011	8.57456	8.50193	8.36173	8.57827	8.46313	8.42835	8.28452	8.58349	8.65579	8.40323	8.4626	8.44243	8.27166	7.9327	7.82239	7.89147	7.83143	8.16666	8.24986	8.58111	8.62301	8.48064	8.392	8.5475	8.39223	238.167	-0.232933
ENSMUSG00000001333	NA	NA	NA	NA	NA	NA	NA	NA	NA	NA	NA	NA	NA	NA	NA	NA	NA	2.58882	2.60329	2.64305	2.6653	2.7659	2.73285	2.11274	2.20959	2.12978	2.18609	2.20601	2.11271	3.07669	3.25059	3.15914	3.40825	3.55734	3.6047	NA	NA	NA	NA	NA	NA	2.61172	2.72135	2.1507	2.16827	3.16214	3.52343	NA	NA
ENSMUSG00000001334	7.09716	7.25477	7.27922	7.08868	7.2746	7.05235	7.16582	7.23324	7.18212	7.44669	7.32281	7.24073	7.66677	7.48956	7.34642	7.46529	7.44291	7.16158	7.34718	7.42751	7.12371	7.53349	7.41717	7.07279	7.08424	6.92901	7.18354	6.81178	6.97803	6.89168	7.13519	6.95153	6.16976	6.32933	6.53014	7.21039	7.18164	7.15047	7.31721	7.46569	7.41821	7.31209	7.35812	7.02868	6.99112	6.9928	6.34308	147.484	-0.0602355
ENSMUSG00000001366	6.54121	6.45134	6.44322	6.47186	6.5971	6.39074	6.3596	6.337	6.51175	6.37223	6.35427	6.47476	6.64594	6.49739	6.38665	6.60478	6.46772	6.67054	6.76467	6.73269	6.59903	6.71807	6.77198	6.16915	6.30373	6.36148	6.02215	6.42473	6.29409	6.46906	6.48335	6.41685	6.71562	6.47302	6.94715	6.47859	6.53448	6.36245	6.41275	6.53936	6.48639	6.72264	6.69636	6.27812	6.24699	6.45642	6.71193	90.6518	0.165843
ENSMUSG00000001376	8.02714	7.87479	7.85192	7.8723	7.79102	8.18134	8.14475	8.19768	8.12425	8.06863	7.99278	8.48649	8.03096	8.21492	8.32298	8.38528	8.24434	8.61974	8.65482	8.48386	8.71919	8.33969	8.46493	8.38982	8.43356	8.32305	8.38872	8.52917	8.20972	8.31119	8.1406	8.14968	8.2727	8.16242	8.1759	7.91795	7.83166	8.17459	8.06189	8.24412	8.31754	8.58614	8.50794	8.38214	8.37587	8.20049	8.20367	237.348	-0.185093
ENSMUSG00000001380	7.96329	7.92542	7.95765	7.83427	7.79722	8.03912	8.23738	8.08968	8.27434	8.04441	8.1009	8.20139	8.06898	8.17982	8.18169	8.14109	8.08486	8.64605	8.39785	8.33178	8.57253	8.11543	8.45834	7.84387	7.8746	7.8945	7.76959	7.81593	7.82753	7.91485	7.83757	7.79046	7.94892	7.71583	7.67233	7.94878	7.81574	8.12206	8.13988	8.15007	8.13588	8.45856	8.3821	7.87099	7.80435	7.84763	7.77903	239.001	-0.277436
ENSMUSG00000001383	8.9616	8.98949	8.91744	8.82792	8.85498	9.05047	9.05427	9.01265	9.15714	8.98178	8.97683	9.45308	9.33062	9.24982	9.31433	9.32917	9.41588	9.80104	9.68179	9.61441	9.76178	9.55838	9.64894	9.44229	9.33462	9.3337	9.32243	9.44192	9.28922	9.41236	9.4121	9.32054	9.44391	9.53511	9.37181	8.95618	8.84145	9.03913	9.03858	9.34451	9.35313	9.69908	9.65637	9.37021	9.35119	9.38167	9.45028	482.308	-0.209168
ENSMUSG00000001403	NA	NA	NA	NA	NA	NA	NA	NA	NA	NA	NA	NA	NA	NA	NA	NA	NA	1.78294	1.72094	1.80831	1.68519	1.61542	1.71135	NA	NA	NA	NA	NA	NA	2.7125	2.65841	2.64636	2.94148	3.01757	3.4584	NA	NA	NA	NA	NA	NA	1.77073	1.67065	NA	NA	2.67242	3.13915	NA	NA
ENSMUSG00000001415	7.29341	7.31526	7.35106	7.24479	7.39374	7.33239	7.34207	7.34515	7.32688	7.28724	7.51576	7.57569	7.62755	7.64456	7.51635	7.62237	7.55342	7.28737	7.51824	7.29726	7.33434	7.42753	7.37007	6.9602	6.89648	6.90186	6.86101	6.96116	6.88045	7.23576	6.99137	7.17892	7.00588	7.19202	6.83649	7.31991	7.31927	7.33987	7.37663	7.61593	7.56405	7.36762	7.37731	6.91951	6.90087	7.13535	7.01146	159.81	0.00885139
ENSMUSG00000001416	9.70703	9.54586	9.72468	9.71469	9.61953	9.77397	9.69544	9.73018	9.88115	9.59925	9.73548	9.83697	9.60288	9.81707	9.72784	9.83211	9.70632	10.0128	9.81354	9.76466	9.88046	9.43318	9.73257	9.09597	9.18114	9.15028	9.14096	9.26142	9.37769	9.16376	9.16796	9.1032	9.31946	9.23672	9.31593	9.65919	9.66711	9.7332	9.73863	9.7523	9.75542	9.86366	9.68207	9.14246	9.26002	9.14497	9.2907	812.533	0.00876474
ENSMUSG00000001418	8.50647	8.74717	8.74319	8.69948	8.81131	8.57306	8.48908	8.61047	8.40537	8.7592	8.76544	8.55707	9.15596	8.94688	8.81578	8.8483	8.9486	8.79554	8.98995	9.09125	8.69369	9.38205	9.17144	8.67594	8.63836	8.62321	8.6606	8.45959	8.74227	8.83209	8.98493	8.95304	8.52319	8.53648	8.81962	8.66561	8.75539	8.55754	8.64334	8.88664	8.87089	8.95891	9.08239	8.64584	8.62082	8.92335	8.62643	418.696	0.159156
ENSMUSG00000001419	7.51836	7.52249	7.48165	7.33892	7.46809	7.74	7.95833	7.84925	7.73217	7.86788	7.76246	8.14647	8.02226	7.93922	7.97608	8.13922	7.96782	8.35674	8.55702	8.46578	8.58569	8.33659	8.41487	7.6866	7.75733	7.78102	7.83046	7.83498	7.49605	8.3089	8.24748	7.85573	8.00714	8.03764	8.07685	7.5075	7.4035	7.84919	7.7875	8.03598	8.02771	8.45985	8.44571	7.74165	7.7205	8.13737	8.04054	177.275	-0.223204
ENSMUSG00000001420	NA	NA	NA	NA	NA	NA	NA	NA	NA	NA	NA	NA	NA	NA	NA	NA	NA	1.44378	1.55018	1.60146	1.48188	1.66837	1.47899	NA	NA	NA	NA	NA	NA	NA	NA	NA	NA	NA	NA	NA	NA	NA	NA	NA	NA	1.53181	1.54308	NA	NA	NA	NA	NA	NA
ENSMUSG00000001424	8.10529	8.00149	8.12042	8.02816	7.99105	8.18226	8.38982	8.16232	8.27995	8.14329	8.3827	8.34156	8.10402	8.19373	8.17392	8.22108	8.07827	8.57144	8.45156	8.2772	8.67474	8.13843	8.4295	7.33837	7.65897	7.49966	7.41484	7.59914	7.57066	7.90083	7.69309	7.71144	7.93495	7.62335	7.81246	8.07574	8.00961	8.2448	8.26865	8.2131	8.15776	8.4334	8.41422	7.499	7.52822	7.76845	7.79025	265.448	-0.137784
ENSMUSG00000001435	4.1824	4.29365	4.06109	4.22696	4.11581	3.61511	3.64603	3.64796	3.55076	3.55764	3.53555	3.95314	4.03129	3.96854	4.01161	3.90392	4.09046	4.19502	4.43963	4.66817	4.38331	4.771	4.59167	3.90773	3.87789	4.12918	3.95191	3.81958	3.87503	5.05394	4.85826	5.01382	5.28034	5.58703	5.81841	4.17905	4.17138	3.63637	3.54798	3.98433	4.00199	4.43427	4.58199	3.9716	3.88217	4.97534	5.56192	18.6921	-0.0814031
ENSMUSG00000001436	5.90946	6.00723	5.92201	5.94682	6.05665	5.49015	5.68494	5.68226	5.63151	5.78626	5.78474	5.83707	5.93233	5.75943	5.86799	5.85381	5.91598	5.67479	5.961	6.04739	5.89958	6.05422	5.93565	5.76436	5.54061	5.69919	5.75519	5.60314	5.5241	5.73053	5.81668	5.92948	5.8795	5.76806	5.76373	5.94623	6.00174	5.61912	5.73417	5.84295	5.87926	5.89439	5.96315	5.66806	5.62748	5.82556	5.80376	62.6671	0.195347
ENSMUSG00000001440	9.82754	9.76785	9.94306	9.9312	9.84128	9.9507	10.0511	9.97424	9.98866	9.85525	10.0781	10.0537	9.97189	10.0745	10.0005	10.0547	9.97294	10.2425	10.0189	9.96308	10.1938	9.74096	10.0072	9.37108	9.39669	9.40836	9.39281	9.47427	9.35232	9.57636	9.50313	9.49712	9.45405	9.36107	9.48975	9.84615	9.88624	9.992	9.974	10.0334	10.0094	10.0748	9.98067	9.39204	9.40647	9.52554	9.43496	932.977	0.0642036
ENSMUSG00000001441	10.1461	9.89378	10.1233	10.2032	10.0372	10.2786	10.1168	10.1269	10.1962	9.93377	10.083	10.3161	10.0926	10.277	10.2905	10.1676	10.1143	10.6178	10.3953	10.187	10.523	10.1429	10.2484	9.86991	10.1356	10.0037	9.97867	10.2027	9.95156	9.98459	9.83101	10.0706	9.9027	9.93582	9.97674	10.0544	10.1202	10.1741	10.071	10.2286	10.1908	10.4	10.3048	10.0031	10.0443	9.96208	9.93842	1089.8	0.104816
ENSMUSG00000001445	6.67609	6.67535	6.85179	6.81337	6.86378	6.77712	6.84278	6.88745	6.86715	6.88469	7.03274	6.98261	7.16997	7.15987	7.06144	7.16876	7.06807	7.10446	7.05978	7.29228	6.83609	7.06572	6.93377	6.46178	6.63575	6.44977	6.44477	6.58203	6.63408	6.87426	6.91562	6.9879	7.28262	7.18907	7.25249	6.73441	6.83857	6.83578	6.92819	7.10415	7.09942	7.15217	6.94519	6.51576	6.55363	6.92593	7.24139	109.976	0.26218
ENSMUSG00000001467	11.3391	11.2437	11.0923	11.4811	11.3064	11.2987	11.054	11.0985	11.1404	11.0001	10.9692	11.3626	11.4934	11.6258	11.6361	11.374	11.6195	11.6341	11.3461	11.5369	11.3767	11.6114	11.4996	11.4855	11.5664	11.4574	11.4908	11.3907	11.701	10.8734	11.0189	11.2497	9.57216	9.64105	9.92009	11.225	11.3937	11.1504	11.0366	11.4939	11.5432	11.5057	11.4959	11.5031	11.5275	11.0473	9.7111	2530.02	0.271004
ENSMUSG00000001472	9.42669	9.37477	9.38406	9.33858	9.3644	9.56204	9.79296	9.60213	9.49668	9.65808	9.65083	9.76177	9.65927	9.68215	9.54884	9.72247	9.65017	9.93883	10.0417	9.89232	10.0864	9.76789	9.97274	9.453	9.39198	9.38028	9.475	9.47885	9.34687	9.67793	9.62915	9.45716	9.53497	9.44766	9.62389	9.39517	9.35149	9.65238	9.60186	9.70106	9.64049	9.9576	9.94234	9.40842	9.43357	9.58808	9.53551	665.544	-0.076513
ENSMUSG00000001473	3.88759	3.78953	3.92437	3.86944	3.93223	4.02275	4.11632	4.12526	4.13444	4.18496	4.33492	4.1402	4.14763	4.28819	4.24808	4.18615	4.16695	3.50443	3.50213	3.49199	3.43482	3.43009	3.46849	3.14416	3.12809	3.22535	3.22751	3.44075	3.46841	4.25251	4.32192	4.34165	5.2085	5.09702	5.4819	3.86716	3.90084	4.08811	4.21811	4.19201	4.20039	3.49952	3.44447	3.16587	3.37889	4.30536	5.26247	14.6485	0.298556
ENSMUSG00000001482	6.89016	6.96244	6.98823	6.89004	7.09724	7.06638	7.18271	7.07688	7.07155	7.20591	7.20008	7.26406	7.49278	7.31004	7.25008	7.27462	7.26815	7.08834	7.17608	7.2892	7.09555	7.13654	7.18955	6.44098	6.48393	6.41057	6.46243	6.326	6.49138	6.81138	6.95572	6.90948	6.99256	6.95347	7.22062	6.94694	6.99364	7.10866	7.15918	7.35563	7.26428	7.18454	7.14055	6.44516	6.4266	6.89219	7.05555	125.221	0.132446
ENSMUSG00000001493	NA	NA	NA	NA	NA	NA	NA	NA	NA	NA	NA	NA	NA	NA	NA	NA	NA	NA	NA	NA	NA	NA	NA	NA	NA	NA	NA	NA	NA	1.5155	1.52394	1.55701	1.65502	1.79205	1.73274	NA	NA	NA	NA	NA	NA	NA	NA	NA	NA	1.53215	1.7266	NA	NA
ENSMUSG00000001496	NA	NA	NA	NA	NA	NA	NA	NA	NA	NA	NA	1.8348	1.92957	1.90876	1.95811	1.94074	1.87178	NA	NA	NA	NA	NA	NA	NA	NA	NA	NA	NA	NA	NA	NA	NA	NA	NA	NA	NA	NA	NA	NA	1.89104	1.92354	NA	NA	NA	NA	NA	NA	NA	NA
ENSMUSG00000001504	5.15401	5.15533	5.27856	5.13709	5.17948	5.01093	4.96942	4.88201	4.95239	4.89083	5.23753	5.03272	5.11425	5.20025	5.12409	5.19793	5.22566	5.19986	5.10371	5.30143	5.19961	5.14433	5.3679	4.12523	4.27464	4.10761	4.16488	4.13401	4.2879	4.48181	4.46478	4.14411	4.35288	4.26485	4.28288	5.19597	5.15828	4.95412	5.02692	5.11574	5.18256	5.20167	5.23728	4.16916	4.1956	4.36357	4.3002	36.3101	-0.184853
ENSMUSG00000001506	5.46745	5.30988	5.20737	5.28532	5.19111	5.13658	5.26647	5.26478	5.50132	5.26493	5.26387	5.01129	5.3561	5.35035	5.10669	5.11297	5.39485	4.86994	5.17634	5.24511	4.75394	5.25998	5.23854	4.81534	4.80347	5.16962	4.73367	4.71781	5.7959	4.8466	5.07923	4.83729	5.38789	5.69719	5.58421	5.32823	5.23821	5.22261	5.34337	5.23925	5.20484	5.09713	5.08415	4.92948	5.08246	4.92104	5.55643	40.0562	-0.431195
ENSMUSG00000001507	5.77384	5.83332	5.80241	5.73254	5.81647	6.12256	6.14599	6.15123	6.13353	6.3071	6.18409	6.41544	6.54033	6.20129	6.50286	6.51193	6.47834	6.6968	6.67064	6.77631	6.56382	7.09228	6.91521	6.90166	6.7485	6.73602	6.70153	6.67472	6.55361	7.10433	7.10878	6.90067	6.95769	6.99161	7.04132	5.80319	5.77451	6.13993	6.20824	6.38568	6.49771	6.71458	6.85711	6.7954	6.64328	7.03793	6.99687	55.3908	-0.0971178
ENSMUSG00000001508	2.77206	2.83995	2.84543	2.84326	2.90232	2.7604	2.77618	2.76668	2.83316	2.8086	2.77418	2.79989	2.82446	2.86243	2.76324	2.82286	2.83386	2.92484	3.03012	3.1067	2.94817	3.12342	3.18492	2.37798	2.38342	2.30616	2.3993	2.37978	2.25486	3.24155	3.25234	3.1267	3.29864	3.62957	3.51897	2.81915	2.87279	2.76775	2.80532	2.82893	2.80665	3.02055	3.0855	2.35585	2.34465	3.20687	3.48239	7.09156	0.920181
ENSMUSG00000001517	2.17703	2.18133	2.16843	2.14287	2.15718	2.06366	1.98611	2.03582	2.03671	1.94555	1.99315	NA	NA	NA	NA	NA	NA	1.55079	1.54654	1.57367	1.74035	1.6953	1.61804	NA	NA	NA	NA	NA	NA	2.38289	2.22403	2.25365	2.41306	2.60388	2.5075	2.17559	2.15002	2.02853	1.9918	NA	NA	1.557	1.68456	NA	NA	2.28686	2.50815	4.50139	-0.718887
ENSMUSG00000001518	5.223	5.40223	5.41229	5.33324	5.39489	5.48636	5.50101	5.47868	5.44537	5.57102	5.56879	5.49151	5.82134	5.71448	5.55025	5.5346	5.7081	5.62168	5.83403	5.61512	5.56108	5.56995	5.81239	4.85032	4.8777	4.81782	4.92327	4.79481	4.65744	5.21682	4.90455	5.05467	5.07867	5.11566	5.15875	5.34584	5.36406	5.48868	5.52839	5.67578	5.59765	5.69028	5.6478	4.84862	4.79184	5.05868	5.11769	41.027	0.0676001
ENSMUSG00000001521	8.34229	8.33764	8.37255	8.39651	8.35861	8.38516	8.23387	8.26603	8.25926	8.18167	8.48577	8.29981	8.65743	8.62768	8.44986	8.50909	8.566	8.59819	8.53296	8.62024	8.47664	8.56692	8.70338	7.99871	8.28152	8.0793	8.08353	8.10591	8.34874	8.1239	8.07063	8.32488	8.15394	8.18092	8.2752	8.35083	8.37756	8.29502	8.3089	8.52831	8.50832	8.5838	8.58231	8.11984	8.17939	8.17314	8.20335	329.011	0.0503112
ENSMUSG00000001524	5.50608	5.5148	5.48422	5.39012	5.48704	5.57341	5.7348	5.61644	5.63675	5.63805	5.59481	5.74814	5.78416	5.75539	5.61048	5.65349	5.63921	5.81811	5.77386	5.83175	5.66926	5.73171	5.75755	4.7515	4.92705	4.69252	4.85756	5.00282	4.91339	5.29491	5.19755	5.1711	5.46324	5.0437	5.18979	5.5017	5.43858	5.64155	5.6232	5.76256	5.63439	5.80791	5.7195	4.79035	4.92459	5.22118	5.23224	44.5682	-0.251911
ENSMUSG00000001525	10.2367	10.2238	10.116	10.0384	10.113	10.3604	10.3948	10.4091	10.3057	10.3707	10.3221	10.7016	10.504	10.428	10.5499	10.6685	10.5177	10.7929	10.957	10.8482	11.0041	10.6454	10.8779	10.2041	10.2657	10.2757	10.3051	10.2841	10.1021	10.5477	10.6143	10.2305	10.1588	10.1744	10.3905	10.1922	10.0757	10.3881	10.3328	10.5445	10.5787	10.8661	10.8425	10.2485	10.2305	10.4642	10.2412	1136.27	-0.196711
ENSMUSG00000001542	4.74175	4.62297	4.68611	4.75141	4.69027	5.05537	5.04499	4.92921	4.93366	5.06841	5.00101	4.86515	4.97919	5.06457	4.95986	5.11465	5.05011	5.37153	5.51848	5.35319	5.50932	5.38001	5.32829	5.60364	5.6488	5.57397	5.61809	5.61766	5.61836	5.51258	5.56837	5.4632	5.83141	5.90177	5.56375	4.68361	4.72084	5.00986	5.00102	4.96963	5.04154	5.4144	5.40587	5.60881	5.61804	5.51472	5.76564	26.1053	0.211313
ENSMUSG00000001552	8.30677	8.26236	8.33609	8.27329	8.31701	8.52926	8.64568	8.54985	8.56689	8.53175	8.69857	8.41987	8.32945	8.57245	8.32308	8.49045	8.29139	8.77909	8.64043	8.55541	8.76053	8.29394	8.5612	7.41772	7.47931	7.54486	7.39228	7.34772	7.7109	7.92782	7.74953	8.00221	7.61937	7.32063	7.53973	8.30174	8.29515	8.57493	8.59907	8.44059	8.3683	8.65831	8.53856	7.48063	7.48363	7.89319	7.49324	315.027	-0.0125129
ENSMUSG00000001555	9.02789	9.18397	9.02744	9.12468	9.19436	8.89137	8.91476	8.87929	8.92474	9.06143	9.0845	8.99064	9.47581	9.3615	9.11838	9.17134	9.4103	9.29646	9.30508	9.56603	9.09658	9.78405	9.60775	9.40376	9.33825	9.50023	9.38589	9.16497	9.65653	9.37549	9.49139	9.63421	9.27742	9.46751	9.37513	9.07977	9.15952	8.89514	9.02356	9.27598	9.23334	9.38919	9.49613	9.41408	9.40246	9.50036	9.37335	554.825	0.140233
ENSMUSG00000001558	NA	NA	NA	NA	NA	NA	NA	NA	NA	NA	NA	2.439	2.46433	2.51498	2.54954	2.41887	2.46356	2.59021	2.34589	2.31369	2.32071	2.43917	2.25537	NA	NA	NA	NA	NA	NA	NA	NA	NA	NA	NA	NA	NA	NA	NA	NA	2.47277	2.47732	2.4166	2.33842	NA	NA	NA	NA	NA	NA
ENSMUSG00000001569	6.40524	6.49229	6.47768	6.62673	6.51184	6.50282	6.57365	6.5556	6.68019	6.48519	6.69845	6.65285	6.57818	6.71123	6.51845	6.72624	6.50394	6.70009	6.72585	6.61521	6.8545	6.46621	6.68215	5.83768	6.02111	5.8532	6.02063	5.89351	5.96746	6.14131	6.08351	6.11708	6.38582	6.19406	6.09317	6.4584	6.56928	6.54402	6.62128	6.64742	6.58288	6.68038	6.66762	5.904	5.96053	6.11397	6.22435	91.2001	0.309505
ENSMUSG00000001576	8.83172	9.02032	8.8068	8.92937	9.04838	8.96201	9.04979	9.04715	8.95751	9.18974	9.04175	9.21562	9.57514	9.34903	9.29847	9.43437	9.5053	9.34115	9.48931	9.62047	9.40106	9.6675	9.60906	9.46278	9.33435	9.2945	9.43819	9.24492	9.29805	9.50867	9.67719	9.53559	9.54414	9.77278	9.726	8.88628	8.98888	9.01965	9.063	9.37993	9.41271	9.48364	9.5592	9.36388	9.32705	9.57382	9.68097	489.425	0.183049
ENSMUSG00000001604	3.27898	3.25068	3.25079	3.25504	3.2207	3.36888	3.32526	3.34375	3.32689	3.37218	3.45719	3.44916	3.55163	3.60972	3.50334	3.52786	3.46571	3.30229	3.38027	3.29957	3.08542	3.268	3.32923	2.51917	2.5211	2.32565	2.47875	2.51688	2.39477	3.30494	3.41433	3.16121	3.3879	3.56498	3.48132	3.26015	3.23787	3.34596	3.38542	3.53684	3.49897	3.32738	3.22755	2.45531	2.46347	3.29349	3.47807	9.60916	-0.313329
ENSMUSG00000001627	6.61133	6.50506	6.55594	6.58536	6.65462	6.71854	6.63289	6.69228	6.80694	6.49833	6.66189	6.74786	6.59615	6.87119	6.89367	6.82872	6.78677	6.81692	6.81983	6.9294	6.6759	6.80066	6.86498	6.42223	6.26039	6.38321	6.35918	6.52716	6.45845	6.59392	6.53071	6.67573	7.0995	6.81321	6.8543	6.55744	6.61999	6.68124	6.65572	6.7384	6.83638	6.85538	6.78051	6.35528	6.44826	6.60012	6.92233	95.8809	0.174391
ENSMUSG00000001630	5.6765	5.52136	5.60716	5.9148	5.74127	5.57304	5.58115	5.69431	5.54388	5.5223	5.62445	5.69091	5.62538	5.91881	5.82598	5.6953	5.5796	5.81301	5.52819	5.487	5.73761	5.25457	5.42678	5.23046	5.30214	5.28362	5.38778	5.3201	5.30544	5.06447	4.9415	5.20819	4.85827	4.8085	4.9104	5.60167	5.82803	5.61617	5.56354	5.74504	5.70029	5.6094	5.47299	5.27207	5.33777	5.07139	4.85906	52.8941	0.833736
ENSMUSG00000001632	5.02337	5.13844	5.08837	4.96769	5.16652	5.37947	5.54229	5.54194	5.46901	5.51625	5.58063	5.4998	5.40612	5.4987	5.60304	5.51359	5.24835	5.47892	5.52285	5.37694	5.55398	5.25772	5.48138	4.51898	4.56095	4.62633	4.56418	4.48443	4.32881	4.85595	4.87998	4.78073	4.86858	4.7282	4.47143	5.08339	5.0671	5.4879	5.52196	5.46821	5.45499	5.45957	5.43103	4.56875	4.45914	4.83889	4.6894	33.7818	-0.0540918
ENSMUSG00000001642	3.42403	3.4555	3.51625	3.47268	3.49381	3.02799	3.01191	3.11117	3.00964	2.99033	3.09551	3.3832	3.3521	3.33927	3.21777	3.31254	3.27479	3.76215	3.70065	3.49032	3.49615	3.58275	3.60021	2.38856	2.37609	2.38676	2.43531	2.45506	2.42199	3.13321	3.33146	3.14939	3.22044	3.32213	3.32248	3.46526	3.48324	3.05036	3.03183	3.35819	3.26836	3.65104	3.5597	2.3838	2.43745	3.20468	3.28835	11.0538	0.202769
ENSMUSG00000001663	7.60663	7.75536	7.87896	7.84373	7.99209	7.8067	7.93865	7.89536	7.86098	7.91943	8.15192	7.82427	8.08071	8.01838	7.82846	7.9287	7.93889	7.73537	7.8976	7.99685	7.66913	7.76847	7.96904	6.70671	7.00797	6.93464	6.93441	6.74915	7.01289	7.26681	7.24388	7.39887	6.79761	6.4473	6.89289	7.74698	7.91791	7.88024	7.97744	7.97445	7.89869	7.8766	7.80221	6.88311	6.89882	7.30319	6.7126	227.327	0.348061
ENSMUSG00000001665	5.27455	5.44746	5.32206	5.31829	5.30817	5.24027	5.30387	5.10725	5.2416	5.28959	5.33893	5.42787	5.44205	5.51378	5.30612	5.3472	5.31525	5.22481	5.42764	5.2039	5.18563	5.10502	5.28879	4.2587	4.5031	4.28674	4.2931	4.16883	4.3665	4.42791	4.29091	4.44071	4.48579	4.49564	4.28826	5.34802	5.31323	5.21713	5.29004	5.46123	5.32286	5.28545	5.19315	4.34951	4.27614	4.38651	4.42323	40.6525	-0.163935
ENSMUSG00000001666	7.74156	7.88199	7.94809	7.84063	7.8431	7.74843	7.63949	7.63153	7.80916	7.61887	7.7254	7.99386	8.15917	8.11853	8.128	8.04002	8.08434	8.18815	7.97676	8.02171	7.78299	8.01089	8.18044	7.20252	7.32852	7.14969	7.16867	7.02684	7.30857	7.50165	7.36664	7.62713	7.11478	7.12179	7.25711	7.85721	7.84187	7.67315	7.71781	8.09052	8.08412	8.06221	7.99144	7.22691	7.16803	7.49847	7.16456	231.547	-0.0397248
ENSMUSG00000001674	4.10973	4.08558	4.20297	4.16297	4.15455	4.75982	4.51047	4.70427	4.63084	4.57846	4.81375	4.71081	4.57026	4.65875	4.58742	4.70815	4.56572	4.93216	4.64557	4.61575	4.79363	4.37576	4.54603	4.12201	3.99077	4.17204	4.06374	4.04803	4.02615	4.10751	3.94603	4.09134	3.96005	4.12972	3.99194	4.13276	4.15876	4.65819	4.67435	4.64661	4.62043	4.73116	4.5718	4.09494	4.04597	4.0483	4.02724	17.6668	0.193543
ENSMUSG00000001687	9.71437	9.71736	9.69332	9.79885	9.76376	9.64769	9.51463	9.57047	9.58619	9.82283	9.73069	9.81875	10.0404	9.92981	9.91498	9.93073	9.98786	9.9694	9.9122	10.0054	9.88987	10.1067	9.99422	9.73413	9.65026	9.66518	9.55866	9.52207	9.63426	9.70049	9.70719	9.91626	9.61107	9.6344	9.58075	9.70835	9.78131	9.5776	9.71324	9.92966	9.94452	9.96233	9.99691	9.68319	9.57166	9.77465	9.60874	854.391	0.124743
ENSMUSG00000001700	8.76363	8.73735	8.78028	8.8616	8.88313	8.83082	8.83913	8.72185	8.94693	8.87862	8.92978	8.92248	9.06881	9.11096	9.03992	8.98383	9.12153	9.28035	8.97895	9.03468	8.99943	8.98707	9.10832	8.70782	8.74923	8.71568	8.62433	8.67553	8.88353	8.55121	8.52247	9.04322	8.39686	8.49805	8.45211	8.76042	8.87237	8.79727	8.91845	9.03408	9.04842	9.098	9.03161	8.72424	8.7278	8.70563	8.44901	448.065	0.205123
ENSMUSG00000001707	6.90265	6.83598	6.79935	6.84783	6.86336	6.9414	6.94401	6.9515	7.07055	6.97613	6.92394	7.29299	7.45671	7.38317	7.35593	7.3961	7.57051	7.51052	7.31141	7.46349	7.26023	7.52537	7.57251	7.31875	7.42842	7.26666	7.16915	7.49262	7.20213	7.35954	7.32194	7.4533	7.6753	7.64194	7.37145	6.84599	6.8556	6.94564	6.99021	7.37762	7.44085	7.42847	7.4527	7.33794	7.28797	7.37826	7.56289	115.459	0.0238451
ENSMUSG00000001729	7.19693	7.31939	7.38102	7.25517	7.36256	7.20065	7.59175	7.31407	7.48173	7.51877	7.61313	7.51769	7.69644	7.68322	7.45465	7.64968	7.58096	7.45544	7.54638	7.49021	7.36302	7.52429	7.56372	7.04905	7.05827	7.07647	6.81237	7.06139	6.94098	7.30477	7.16737	7.49698	7.34343	7.4315	7.61155	7.29911	7.30886	7.36882	7.53788	7.63245	7.56176	7.49735	7.48367	7.06127	6.93825	7.32304	7.46216	158.249	0.0218127
ENSMUSG00000001741	2.73364	2.69984	2.73396	2.75538	2.74793	3.2297	3.16428	3.1936	3.18142	3.26478	3.33527	3.68621	3.63509	3.73489	3.74072	3.61467	3.66893	3.39392	3.6572	3.63685	3.59222	3.55901	3.46312	3.15663	3.28966	3.32507	3.24854	3.15476	3.20494	2.52545	2.59045	2.63333	2.7007	2.46711	2.44459	2.72248	2.75165	3.19586	3.26049	3.6854	3.67477	3.56265	3.53812	3.25712	3.20275	2.58307	2.53747	6.63717	0.531538
ENSMUSG00000001750	5.36105	5.43761	5.50875	5.35681	5.50152	5.40429	5.51299	5.47012	5.3415	5.52947	5.61727	5.55763	5.7549	5.64523	5.54719	5.49966	5.65745	5.77889	5.78532	6.15143	5.8305	6.01204	6.1378	4.98199	5.09229	5.03764	5.00131	5.22381	5.06888	5.39624	5.36407	5.34803	5.15624	5.39963	5.47242	5.4358	5.42917	5.46247	5.49608	5.65259	5.5681	5.90521	5.99344	5.03731	5.098	5.36944	5.34276	43.1994	-0.0192088
ENSMUSG00000001751	6.44326	6.68799	6.68437	6.59219	6.75871	6.45768	6.33631	6.40122	6.37004	6.47457	6.54198	6.66077	6.81888	6.66437	6.54501	6.68431	6.67672	6.29003	6.64869	6.75602	6.37362	7.04736	6.74727	6.45152	6.21331	6.33757	6.5242	6.45718	6.388	6.372	6.61205	6.7298	7.1709	7.1304	7.13302	6.60521	6.67545	6.3984	6.4622	6.71467	6.63535	6.56491	6.72275	6.33413	6.45646	6.57129	7.14477	99.9669	0.185615
ENSMUSG00000001755	6.87276	6.93966	7.02944	6.89488	7.08247	7.07067	6.89899	6.83807	6.99615	7.03977	7.02979	7.11928	7.16729	7.22388	6.99866	7.09291	7.03858	7.01901	6.9747	6.86324	6.97163	6.83006	6.96738	6.42837	6.56407	6.5365	6.34959	6.93545	6.566	6.6766	6.35632	6.61288	6.84345	6.90661	6.92409	6.94729	6.98868	6.93591	7.0219	7.17015	7.04338	6.95232	6.92302	6.50965	6.61701	6.5486	6.89138	125.112	0.112797
ENSMUSG00000001761	6.75018	6.91144	6.81707	6.75486	7.00354	6.69695	6.66393	6.66122	6.73097	7.00514	6.71022	6.63684	7.1217	6.99678	6.89883	6.8526	6.95152	6.6701	6.72034	7.16365	6.56787	7.21181	6.96294	6.52621	6.37575	6.70138	6.36767	6.32119	6.6913	6.2883	6.39824	6.76357	6.78619	6.84919	6.91749	6.82623	6.8792	6.67403	6.81544	6.91844	6.90098	6.85136	6.9142	6.53445	6.46005	6.48337	6.85096	115.721	0.155414
ENSMUSG00000001763	7.18062	7.25666	7.18903	7.08511	7.29941	7.09404	7.32984	7.38811	7.18801	7.46639	7.20992	7.32377	7.79535	7.48493	7.33423	7.58793	7.6061	7.49796	7.80185	7.99546	7.60841	8.19212	7.96306	7.58493	7.36809	7.3647	7.53553	7.15175	7.33306	7.82295	7.94026	7.74088	7.11523	7.4967	7.37888	7.20877	7.19226	7.27066	7.28811	7.53468	7.50942	7.76509	7.92119	7.43924	7.34012	7.8347	7.33027	147.59	-0.0200707
ENSMUSG00000001767	6.86898	6.82893	6.89001	7.01865	6.96037	7.07921	7.05171	7.12941	7.25132	6.99903	7.04515	7.11594	6.76554	7.14033	7.22561	7.03476	6.97291	7.78375	7.30847	7.21876	7.68131	6.91544	7.26138	6.64076	6.73181	6.79548	6.98503	6.55816	6.82715	6.78873	6.72074	6.49577	6.29175	6.31973	6.35646	6.86264	6.98951	7.08677	7.0985	7.00727	7.07776	7.43699	7.28604	6.72268	6.79011	6.66841	6.32265	120.951	0.315246
ENSMUSG00000001768	8.39449	8.51874	8.73822	8.60722	8.5892	8.57363	8.3474	8.59449	8.37912	8.45638	8.67329	8.55071	8.64979	8.97665	8.74395	8.73927	8.65657	8.72548	8.39348	8.38873	8.3881	8.39056	8.31104	7.59613	7.85443	7.74488	7.73933	7.98064	8.01888	8.53015	8.02997	8.27235	9.12841	8.75899	8.64483	8.55048	8.59821	8.50517	8.50293	8.72572	8.71326	8.50256	8.36324	7.73181	7.91295	8.27749	8.84408	382.732	0.0700955
ENSMUSG00000001773	10.164	10.1237	10.1812	10.3054	10.0838	10.2499	9.88574	9.98229	10.1315	9.90071	10.0717	10.3681	10.5422	10.4146	10.6513	10.338	10.7015	11.1456	10.5199	10.8124	10.7843	11.0947	10.7766	11.2179	11.0668	11.2594	11.1436	10.8414	11.2136	10.9461	10.9012	11.2844	10.9687	10.9707	10.6968	10.1563	10.1946	10.0393	10.0346	10.4416	10.5636	10.826	10.8852	11.1814	11.0662	11.0439	10.8787	1157.25	0.0717375
ENSMUSG00000001774	7.62347	7.41195	7.35172	7.4612	7.32387	7.77195	7.36254	7.70549	7.53999	7.38567	7.30735	7.93211	7.7284	8.00264	8.2228	7.83261	7.92619	8.90181	8.44385	8.3431	8.76554	8.35933	8.29606	8.12488	8.21189	8.15422	8.23843	8.32102	7.98072	8.38561	8.49582	8.37697	7.349	7.59262	7.57276	7.46238	7.39253	7.61333	7.411	7.88772	7.99387	8.56292	8.47364	8.16366	8.18005	8.41947	7.5048	174.771	-0.169159
ENSMUSG00000001783	8.14519	8.0957	8.11174	8.24352	8.13186	8.19661	8.30079	8.3484	8.24206	8.18894	8.23461	8.41509	8.16082	8.23692	8.37176	8.38008	8.21238	8.47505	8.50331	8.32997	8.51187	8.13549	8.43978	7.76897	7.83487	7.90966	7.87493	7.76055	7.98504	8.03612	8.07444	7.78707	8.04517	7.76627	8.00146	8.11755	8.18769	8.28193	8.22187	8.27094	8.3214	8.43611	8.36238	7.83783	7.87351	7.96588	7.93763	283.793	0.138286
ENSMUSG00000001785	6.39241	6.42634	6.50032	6.5767	6.42069	6.30672	6.45636	6.50917	6.2977	6.59885	6.47537	6.53911	6.45354	6.69188	6.6472	6.6716	6.48332	6.75159	6.78312	6.79454	6.74339	6.43132	6.69692	5.64707	5.71067	5.90918	5.72486	5.7333	6.1874	5.94129	5.87777	5.64844	5.89775	5.85382	6.05682	6.43969	6.49869	6.42408	6.45731	6.56151	6.6007	6.77641	6.62388	5.75564	5.88185	5.8225	5.93613	88.7455	0.166591
ENSMUSG00000001786	7.13889	7.11553	7.28507	7.20688	7.269	7.13178	7.1556	7.1885	7.272	7.19316	7.35096	7.43988	7.46151	7.5207	7.47068	7.4894	7.38634	7.58394	7.41042	7.4121	7.44128	7.38486	7.53048	6.82312	7.02067	6.77211	6.98646	7.07685	6.97137	6.98751	6.9674	7.15381	7.32005	7.07155	6.97225	7.17983	7.23794	7.15863	7.27204	7.47403	7.44881	7.46882	7.45221	6.87197	7.01156	7.03624	7.12128	147.62	0.131397
ENSMUSG00000001794	9.7739	9.82049	9.99748	9.82787	9.9734	9.89667	10.181	9.99515	10.1273	10.1438	10.3333	10.0852	10.3606	10.2903	10.0459	10.1402	10.104	9.98743	9.99548	9.97576	9.87508	9.92701	10.0524	9.36699	9.41522	9.4041	9.38494	9.88812	9.98296	9.63789	9.4967	9.62142	10.5454	10.4369	10.6569	9.86396	9.90063	10.0243	10.2015	10.2454	10.0967	9.98622	9.9515	9.39544	9.75201	9.58534	10.5464	945.253	0.0596888
ENSMUSG00000001802	5.26793	5.31718	5.37411	5.22236	5.3857	5.32426	5.41073	5.39991	5.24375	5.49068	5.34135	5.84266	5.87845	5.63911	5.68791	5.73828	5.80481	5.75976	6.07131	6.02559	5.80751	6.26562	5.95878	5.73946	5.61816	5.62184	5.63096	5.5598	5.29744	6.08446	6.06357	5.96927	5.9076	6.12546	6.24284	5.31974	5.30403	5.3783	5.35859	5.78674	5.74367	5.95222	6.01064	5.65982	5.49607	6.0391	6.09197	39.7178	-0.0525476
ENSMUSG00000001827	4.53551	4.57217	4.48515	4.49348	4.59474	4.80636	4.99811	4.81677	4.95006	4.96053	4.94026	4.98898	5.18823	5.09453	4.96875	5.15083	5.15243	5.38291	5.38561	5.41509	5.27374	5.40286	5.60456	4.471	4.38844	4.51208	4.61744	4.33504	4.49062	4.49882	4.67781	4.85936	4.47154	4.82924	4.35421	4.53094	4.54411	4.87375	4.95029	5.09058	5.09067	5.39454	5.42705	4.45717	4.48103	4.67866	4.55166	23.1853	0.097465
ENSMUSG00000001829	7.67456	7.67555	7.81023	7.79976	7.80536	7.80536	8.06106	7.87172	7.96516	7.88912	7.92225	7.90911	7.78486	7.91763	7.72308	7.93332	7.7421	8.02933	7.99229	7.95446	8.15999	7.87521	8.058	7.22861	7.43034	7.44496	7.39548	7.36674	7.54319	7.46452	7.58245	7.46137	7.50895	7.40546	7.66566	7.72011	7.80256	7.91271	7.92551	7.87054	7.7995	7.99203	8.03107	7.36797	7.43514	7.50278	7.52669	216.171	0.168009
ENSMUSG00000001833	11.9645	11.7825	11.8674	12.0979	11.6745	12.1107	11.8553	12.0215	12.0797	11.5239	11.7111	12.0563	11.6287	11.9891	12.1155	11.9266	11.922	12.8123	12.3094	12.0906	12.6506	11.9077	12.2313	11.7853	11.9462	12.022	11.9491	12.0078	12.0642	11.7324	11.6232	11.6759	11.5986	11.465	11.442	11.8715	11.8862	11.9958	11.7716	11.8914	11.988	12.4041	12.2632	11.9178	12.007	11.6772	11.5019	3805.51	0.0527627
ENSMUSG00000001844	5.4695	5.62732	5.47531	5.38367	5.5163	5.57461	5.35062	5.44285	5.52772	5.55363	5.54019	5.67873	5.83048	5.78117	5.79602	5.76992	5.56579	5.76492	5.93339	6.28585	5.65036	6.09516	6.02412	5.56218	5.58321	5.82102	5.54261	5.39179	5.57638	5.7122	5.76294	5.8906	6.01136	6.03639	5.96175	5.52404	5.44998	5.45603	5.54051	5.76346	5.71058	5.99472	5.92321	5.65547	5.50359	5.78858	6.00316	45.4113	-0.299757
ENSMUSG00000001847	10.5722	10.5608	10.7106	10.6817	10.7528	10.7049	10.7316	10.7394	10.6425	10.7488	10.8119	10.7076	10.8894	10.8802	10.8127	10.8902	10.8438	10.8231	10.9313	10.8818	10.7221	10.6823	10.9702	9.95537	9.98381	10.1636	9.98399	10.0248	10.3528	10.3407	10.3799	10.3362	10.6142	10.5539	10.7332	10.6145	10.7172	10.7253	10.7344	10.8257	10.8489	10.8787	10.7916	10.0343	10.1205	10.3523	10.6338	1617.86	0.166729
ENSMUSG00000001855	7.16153	7.13271	7.12389	7.11673	7.19441	7.20362	7.17918	7.15292	7.17518	7.10531	7.30453	7.44268	7.37292	7.39567	7.44198	7.44603	7.49544	7.49139	7.41083	7.41595	7.54635	7.48802	7.45238	7.18218	7.26683	7.25953	7.23436	7.29643	7.12733	7.34358	7.32476	7.3352	7.44513	7.19087	7.33215	7.13938	7.15557	7.17857	7.19501	7.40376	7.46115	7.43939	7.49558	7.23618	7.21937	7.33452	7.32272	141.59	0.0434556
ENSMUSG00000001864	5.91709	5.9257	5.84784	5.83945	5.74395	5.75992	5.88365	5.73912	5.78818	5.71982	5.78666	5.72284	5.78028	5.84006	5.64968	5.73079	5.79702	5.85916	5.89005	6.05106	5.78919	5.80762	6.00534	5.25492	5.37521	5.30997	5.26093	5.24981	5.49634	5.28452	5.46992	5.45031	5.50295	5.42008	5.7855	5.89688	5.7917	5.79423	5.76489	5.78106	5.72583	5.93342	5.86738	5.31337	5.33569	5.40158	5.56951	58.4376	-0.382813
ENSMUSG00000001870	8.95092	9.05438	8.99671	9.13096	9.18209	9.03365	8.94505	8.89431	8.92762	9.05474	9.19252	9.21706	9.4007	9.42976	9.29078	9.22777	9.4445	9.64607	9.30937	9.499	9.5551	9.74964	9.51186	9.71148	9.66775	9.79567	9.73961	9.22112	9.6079	9.1961	9.45638	9.70497	9.10774	9.33991	8.94856	9.00067	9.15652	8.95767	9.05829	9.34918	9.32101	9.48482	9.60553	9.72497	9.52288	9.45248	9.13207	536.953	0.27921
ENSMUSG00000001891	11.4196	11.1892	11.1681	11.4629	11.2209	11.4755	11.0914	11.0875	11.3084	10.8788	10.9813	11.4168	10.9698	11.299	11.4711	11.1205	11.1466	11.7602	11.3326	11.2007	11.5631	10.9827	11.2312	10.8882	11.0657	11.1095	10.9973	11.0946	11.4065	10.654	10.5222	10.7565	10.6676	10.577	10.5004	11.259	11.3419	11.2182	11.0561	11.2285	11.2461	11.4312	11.259	11.0212	11.1662	10.6442	10.5817	2528.79	0.134975
ENSMUSG00000001901	2.93256	2.90013	3.01484	2.86181	2.94915	2.49477	2.52592	2.49682	2.58177	2.63147	2.50335	3.30932	3.3917	3.22135	3.29648	3.35387	3.31634	3.44223	3.59049	3.63611	3.44962	3.72122	3.64438	2.73994	2.77917	2.77513	2.65762	2.61567	2.65785	2.90411	2.91619	2.79635	2.78123	2.97427	2.79171	2.94918	2.90548	2.50584	2.5722	3.30746	3.32223	3.55628	3.60507	2.76474	2.64371	2.87222	2.84907	7.57603	-0.745926
ENSMUSG00000001909	5.54249	5.51456	5.54488	5.62605	5.55704	5.77111	5.77483	5.69535	5.91644	5.94055	5.92188	5.94778	6.12711	5.94686	5.87644	5.92138	5.9002	6.03595	6.19884	6.12164	6.16875	6.04988	6.14505	5.5454	5.39172	5.37852	5.47536	5.49303	5.28432	5.71005	5.70216	5.80416	5.82194	5.73327	5.86026	5.53397	5.59155	5.7471	5.92629	6.00725	5.89934	6.11881	6.12123	5.43855	5.41757	5.73879	5.80516	47.2041	0.225892
ENSMUSG00000001910	7.43533	7.41881	7.47686	7.29557	7.41206	7.34298	7.37982	7.34559	7.46809	7.50968	7.5226	7.57687	7.80466	7.61309	7.47677	7.67078	7.60564	7.28069	7.51407	7.61918	7.35616	7.55573	7.59264	6.90528	6.94721	6.91575	6.92608	7.05599	7.08507	7.45893	7.26405	7.33198	7.67428	7.59988	7.65194	7.44367	7.35382	7.35613	7.50012	7.66487	7.58439	7.47131	7.50151	6.92275	7.02238	7.35166	7.64204	170.12	-0.19623
ENSMUSG00000001911	10.4292	10.486	10.5874	10.4907	10.6032	10.4181	10.5215	10.3967	10.4829	10.5182	10.6167	10.4943	10.7014	10.7447	10.4591	10.6102	10.6237	10.6283	10.6361	10.5864	10.5253	10.5846	10.7318	9.83687	9.91378	9.90689	9.84538	9.92091	10.0814	10.0955	10.0397	10.246	10.2488	10.18	10.2003	10.5008	10.5469	10.4454	10.5393	10.6468	10.5644	10.6169	10.6139	9.88585	9.94923	10.1271	10.2097	1470.84	0.0760771
ENSMUSG00000001918	2.87437	2.90612	2.81581	2.85881	2.82982	2.45582	2.48744	2.49385	2.50301	2.4658	2.46135	2.68689	2.79926	2.67066	2.84652	2.75501	2.84367	2.46948	2.54202	2.73299	2.7107	2.68598	2.62143	3.65141	3.62686	3.76262	3.60263	3.85444	3.85592	4.6517	4.97913	4.80805	6.65834	6.64195	6.08072	2.86543	2.84431	2.47904	2.47672	2.71893	2.81507	2.5815	2.6727	3.68029	3.771	4.81296	6.46033	7.40274	-0.385482
ENSMUSG00000001924	10.7673	10.6875	10.907	10.8217	10.8688	10.9142	10.9892	10.8918	10.9061	10.7676	10.9711	11.0246	10.8757	10.9185	10.8378	11.0023	10.8009	11.2323	11.0573	10.9267	11.2316	10.8049	10.9908	10.2363	10.4095	10.3131	10.349	10.365	10.349	10.6299	10.4361	10.419	10.4863	10.2938	10.2675	10.7872	10.8452	10.9317	10.8816	10.9396	10.8803	11.0721	11.0091	10.3196	10.3543	10.495	10.3492	1801.32	0.0891096
ENSMUSG00000001930	3.25485	3.17663	3.21522	3.23206	3.18542	3.17124	3.17222	3.28519	3.19085	3.13241	3.34612	3.40884	3.63872	3.56059	3.45835	3.52779	3.37656	3.57014	3.48873	3.72908	3.61243	3.6622	3.55324	3.34956	3.39724	3.37347	3.28355	3.28339	3.33326	3.88431	3.67511	3.80045	4.11357	4.14163	3.95936	3.21556	3.20874	3.20955	3.22312	3.53605	3.45424	3.59598	3.60929	3.37342	3.30007	3.78662	4.07152	9.36637	-0.104993
ENSMUSG00000001942	8.30283	8.22673	8.36542	8.29895	8.47253	8.23875	8.12143	8.21604	8.11674	8.24813	8.29332	8.43034	8.77429	8.6646	8.42151	8.6037	8.77221	8.65525	8.63552	8.79667	8.56184	9.05084	8.85695	8.75978	8.72871	8.85731	8.82492	8.47916	8.65357	8.70803	8.78171	8.83914	8.25613	8.55863	8.68682	8.29833	8.38574	8.19207	8.2194	8.62308	8.59914	8.69581	8.82321	8.78193	8.65255	8.77629	8.50053	323.524	0.174952
ENSMUSG00000001946	2.27209	2.20969	2.2746	2.27906	2.28536	2.73855	2.76863	2.86568	2.86311	2.87323	2.80386	2.4013	2.48815	2.36301	2.32575	2.49437	2.38946	2.98046	3.26674	3.19118	3.05879	3.03744	3.17196	2.71158	2.45181	2.6315	2.64694	2.6468	2.65578	2.6952	2.86114	2.6399	2.59342	2.88865	2.87075	2.25213	2.28221	2.79095	2.84673	2.41749	2.40319	3.14613	3.0894	2.5983	2.64984	2.73208	2.78427	4.7648	0.733796
ENSMUSG00000001948	5.25443	5.21308	5.25457	5.23561	5.12796	5.41375	5.44705	5.43844	5.56447	5.36338	5.46898	5.52943	5.65959	5.59337	5.71151	5.6973	5.7393	5.9463	5.72791	5.66775	5.7345	5.78219	6.02668	5.4605	5.64012	5.50246	5.45587	5.35326	5.59869	5.56796	5.70833	5.60281	5.93576	5.77547	5.54652	5.24069	5.18178	5.43308	5.46561	5.59413	5.71603	5.78065	5.84779	5.53436	5.46927	5.62637	5.75259	37.508	-0.280398
ENSMUSG00000001962	6.66233	6.64725	6.66183	6.7358	6.51395	7.05313	7.00598	6.81585	6.95152	6.80045	7.00393	6.96309	6.78328	6.99208	6.96549	6.92727	6.82738	7.32896	7.00929	7.08497	7.18602	6.83104	7.0839	6.27581	6.34941	6.4516	6.44306	6.21246	6.47701	6.28543	6.13587	6.33581	6.19612	5.84575	6.02526	6.65713	6.62487	6.95832	6.91863	6.91282	6.90671	7.14107	7.03365	6.35894	6.37751	6.25237	6.02238	100.831	-0.0808821
ENSMUSG00000001964	7.28919	7.2211	7.25558	7.17158	7.21115	7.43078	7.22964	7.25789	7.24149	7.07011	7.26074	7.49704	7.46397	7.42683	7.47011	7.46629	7.57615	7.61346	7.57915	7.53098	7.56241	7.48808	7.51431	7.15028	7.18521	7.22265	7.16409	7.09387	7.16903	7.10552	7.1684	7.19452	7.46267	7.39641	7.4813	7.25529	7.19136	7.3061	7.19078	7.46261	7.50418	7.57453	7.5216	7.18605	7.14233	7.15615	7.44679	150.259	-0.149253
ENSMUSG00000001983	6.67319	6.61865	6.81656	6.71587	6.66202	6.73663	6.84078	6.81242	6.86824	6.84419	6.89879	6.90065	6.74973	6.99571	6.93175	6.80586	6.73111	7.04728	6.88524	6.7847	7.00025	6.73708	6.91256	6.09807	6.29029	6.24816	6.16505	6.20723	6.70052	6.38782	6.08135	6.17273	6.10735	6.01013	6.04596	6.7028	6.68895	6.79661	6.87041	6.88203	6.8229	6.90574	6.8833	6.21217	6.3576	6.21397	6.05448	104.159	-0.0493883
ENSMUSG00000001985	5.71916	5.89462	5.55523	5.52827	5.46827	5.76139	5.81536	5.6487	5.59787	5.7506	5.4179	6.33981	6.18987	5.89805	6.33845	6.29955	6.31395	6.56864	6.9651	7.12652	6.88421	7.23552	6.92805	7.22397	6.94673	6.85332	7.06433	6.88346	6.37166	7.39517	7.70173	7.27951	7.24745	7.51237	7.48119	5.723	5.49827	5.74182	5.58879	6.14258	6.31732	6.88675	7.01592	7.00801	6.77315	7.4588	7.41367	51.6497	-0.935797
ENSMUSG00000001986	8.68033	8.70014	8.02328	8.16822	8.03064	9.01255	8.94731	9.06186	9.02872	9.03989	8.31937	9.93774	9.58257	8.74062	9.65661	9.71683	9.87215	10.2801	10.4896	10.4634	10.747	10.7955	10.3407	11.2396	10.9608	11.1513	11.3911	10.8531	10.2106	11.135	11.3696	10.7785	10.6274	10.8724	10.569	8.46792	8.09943	9.00724	8.79599	9.42031	9.74853	10.411	10.6277	11.1172	10.8182	11.0944	10.6896	340.261	-0.794672
ENSMUSG00000001995	7.20342	7.31936	7.06574	7.25464	7.24557	7.13453	7.33306	7.36288	7.22935	7.35728	7.35122	7.14876	7.53749	7.35604	7.52986	7.45918	7.38476	7.12118	7.51705	7.60631	7.3722	7.33	7.51525	6.78001	6.80599	7.02195	6.76947	6.62588	7.09216	6.85834	6.82547	6.8713	6.35708	6.65926	6.73237	7.19617	7.25011	7.27682	7.31262	7.34743	7.45793	7.41485	7.40582	6.86932	6.82917	6.8517	6.5829	149.779	0.115872
ENSMUSG00000001998	5.30928	5.18977	5.2375	5.33794	5.36082	5.55747	5.49087	5.55043	5.33206	5.31442	5.44525	5.64784	5.66249	5.62591	5.83192	5.65434	5.631	5.95584	5.8155	5.70374	5.86178	5.89163	5.59962	5.7902	5.85203	5.93963	5.89275	5.92219	5.63321	5.64862	5.54366	5.53797	5.55753	5.67186	5.59321	5.24551	5.34938	5.53292	5.36391	5.64541	5.70575	5.82503	5.78434	5.86062	5.81605	5.57675	5.60753	39.142	0.455651
ENSMUSG00000001999	6.19312	6.19918	6.19149	6.04212	6.11779	6.45131	6.34432	6.27949	6.36764	6.29244	6.21203	6.51649	6.36035	6.48306	6.50297	6.49075	6.39518	6.70349	6.48035	6.45139	6.61976	6.20707	6.54697	6.05519	6.05824	6.13407	6.13894	6.36301	6.15192	5.93252	5.89369	5.96324	5.97303	5.78631	5.92562	6.1946	6.07996	6.35838	6.2907	6.4533	6.46296	6.54508	6.45793	6.0825	6.21796	5.92982	5.89499	71.2105	-0.362888
ENSMUSG00000002006	5.3295	5.33098	5.14001	5.03934	5.13566	5.5234	5.54185	5.50258	5.66131	5.57908	5.30717	5.95292	5.7981	5.4102	5.78763	5.8441	5.79141	6.14159	6.31887	6.45924	6.48727	6.43014	6.2488	6.06782	5.91027	6.04045	6.08224	5.95932	5.88717	6.18069	6.23117	5.70044	6.28879	6.31923	6.53434	5.26683	5.0875	5.52261	5.51585	5.72041	5.80771	6.30657	6.38874	6.00618	5.97624	6.03744	6.38079	37.5205	-0.877705
ENSMUSG00000002010	10.0385	9.98961	10.174	10.0736	10.0693	10.1037	10.1067	10.0441	10.0034	9.95856	10.1452	10.1059	9.86894	10.1783	10.0655	10.0506	9.94501	10.2892	10.2098	10.0729	10.1471	9.87198	10.1939	9.24705	9.38208	9.48846	9.39717	9.35802	9.58419	9.50337	9.40875	9.25187	9.37089	9.19861	9.19612	10.0674	10.0715	10.0848	10.0357	10.051	10.0204	10.1906	10.071	9.37253	9.44646	9.388	9.2552	1076.26	0.00147338
ENSMUSG00000002012	6.94789	6.9205	6.6093	6.64031	6.47769	7.19346	7.32603	7.10957	7.15042	6.97592	6.69019	7.47597	7.2137	6.8568	7.38208	7.49942	7.30335	7.62251	7.90506	7.96211	7.8574	7.93474	7.67423	7.41477	7.28839	7.23463	7.15893	7.29555	6.91859	7.63623	7.55119	7.37488	7.44292	7.36122	7.6926	6.8259	6.559	7.20969	6.93884	7.18216	7.39495	7.82989	7.82212	7.3126	7.12436	7.52077	7.49891	109.151	-0.747
ENSMUSG00000002014	8.30539	8.22687	8.27189	8.31278	8.31224	8.34982	8.2967	8.32014	8.33493	8.23037	8.22377	8.52037	8.6702	8.62005	8.58159	8.6972	8.71183	8.66152	8.74746	8.91537	8.65103	9.13683	8.89143	8.79938	8.6936	8.63993	8.70361	8.64863	8.56948	8.74919	8.86941	8.98707	8.9206	8.96679	9.05122	8.26805	8.31251	8.32222	8.26302	8.60354	8.66354	8.77478	8.8931	8.71097	8.64057	8.86856	8.97954	312.252	0.0852614
ENSMUSG00000002015	9.40133	9.39819	9.40364	9.49476	9.52778	9.37144	9.23375	9.35294	9.44096	9.36656	9.32458	9.66561	9.81109	9.72499	9.75556	9.68565	9.85002	9.97674	9.89829	10.0544	9.81646	10.2124	9.9776	10.0111	9.94256	9.84384	9.96385	9.81954	9.90101	9.71219	9.83354	9.88065	9.71487	9.82173	9.77885	9.40105	9.51127	9.31937	9.37737	9.7339	9.76374	9.97648	10.0022	9.93248	9.8948	9.80879	9.77181	698.137	0.192541
ENSMUSG00000002017	7.04423	6.84319	6.96048	6.93625	6.9941	7.15815	7.09215	7.1421	7.08642	7.11422	7.07908	7.20689	7.07116	7.19236	7.35403	7.16863	7.02037	7.50948	7.29541	7.24808	7.31719	7.01136	7.31853	6.48858	6.52045	6.55945	6.60423	6.75335	6.957	6.73495	6.65844	6.83174	6.54492	6.57846	6.70978	6.9493	6.96517	7.1308	7.09324	7.1568	7.18101	7.35099	7.21569	6.52283	6.77153	6.74171	6.61105	124.425	0.0339362
ENSMUSG00000002020	2.03185	2.03726	1.97426	1.95672	1.94152	2.44297	2.23173	2.26625	2.2615	2.32564	2.21154	NA	NA	NA	NA	NA	NA	NA	NA	NA	NA	NA	NA	NA	NA	NA	NA	NA	NA	1.95861	2.42994	2.00293	2.16929	2.18	1.98645	2.01446	1.94912	2.31365	2.26623	NA	NA	NA	NA	NA	NA	2.1305	2.11191	4.14395	-2.82895
ENSMUSG00000002028	6.51443	6.63561	6.53642	6.51239	6.56136	6.97641	7.01199	6.85954	6.88265	6.84936	6.86957	7.16387	6.90383	6.90539	7.03327	7.11624	6.86928	7.64605	7.35197	7.33562	7.84353	7.26363	7.21263	6.82762	6.99853	6.96642	7.05534	6.80471	6.78855	6.66286	7.00585	6.99037	6.71469	6.65391	6.62977	6.56215	6.53687	6.94931	6.86719	6.99103	7.00626	7.44455	7.43993	6.93086	6.88287	6.88636	6.66612	94.0131	-0.0702676
ENSMUSG00000002031	7.02937	7.00415	7.1156	7.02315	7.00001	6.95757	7.06561	7.10407	7.05347	6.97142	7.17469	7.18095	7.21247	7.28893	7.14207	7.29395	7.2425	7.42453	7.33913	7.32082	7.37336	7.19457	7.34488	6.64044	6.67366	6.64109	6.62517	6.74915	6.78783	6.80913	6.78805	6.86665	6.72778	6.73924	6.93784	7.04971	7.01158	7.04242	7.06653	7.22745	7.22617	7.36149	7.30427	6.65173	6.72071	6.82128	6.80162	131.28	-0.0985313
ENSMUSG00000002032	6.17612	6.31825	6.20733	6.19675	6.26789	6.43071	6.46374	6.4407	6.3162	6.59221	6.47233	6.7	6.86815	6.55664	6.7396	6.68298	6.7595	6.99123	7.23544	7.22387	7.17606	7.46119	7.21935	7.01656	6.7783	6.91852	6.89205	6.55878	6.78821	6.83922	7.1081	6.93588	6.63087	6.72041	6.61673	6.2339	6.23232	6.44505	6.46024	6.70827	6.72736	7.15018	7.28553	6.90446	6.74635	6.96107	6.656	75.3945	-0.00386805
ENSMUSG00000002043	4.97336	5.16725	5.13069	5.10411	5.07273	4.55298	4.63885	4.59172	4.61142	4.66868	4.67264	5.10603	5.18234	4.99741	4.96242	5.13294	5.11392	5.05725	5.15031	5.15262	5.07411	5.15047	5.11862	4.48557	4.61477	4.63936	4.45505	4.4836	4.63248	4.86704	4.83066	4.72925	5.24147	5.36913	5.00225	5.09043	5.08842	4.59451	4.65091	5.09526	5.06976	5.12006	5.1144	4.5799	4.52371	4.80898	5.20428	34.3362	-0.0268206
ENSMUSG00000002052	8.28063	8.07658	8.26177	8.2077	8.21919	8.42348	8.57961	8.57322	8.41012	8.45788	8.49777	8.72365	8.47724	8.45743	8.51914	8.67416	8.362	8.88352	8.7676	8.72364	9.13536	8.38625	8.66988	8.07773	8.19626	8.35205	8.38227	8.13728	8.19244	8.39837	8.43789	7.97023	8.0424	8.20358	8.33509	8.20632	8.21344	8.52544	8.45526	8.55277	8.51844	8.79159	8.7305	8.20868	8.23733	8.26883	8.19369	296.779	0.00565729
ENSMUSG00000002055	7.38686	7.39245	7.50649	7.44619	7.42484	7.49011	7.27843	7.49841	7.43453	7.30394	7.55913	7.44866	7.78773	7.72012	7.55015	7.7284	7.74201	7.78223	7.40181	7.7617	7.54667	7.73455	7.75785	6.79215	6.88334	6.81561	6.81317	6.92645	7.13306	7.29633	7.05833	7.22655	6.9408	7.15423	6.91005	7.4286	7.43552	7.42232	7.43253	7.65217	7.67352	7.64858	7.67969	6.83037	6.95756	7.19374	7.00169	172.802	0.0103406
ENSMUSG00000002058	6.54466	6.55725	6.44149	6.48048	6.59771	6.25667	6.34264	6.30494	6.28623	6.46781	6.50558	6.66861	6.84572	6.80664	6.53901	6.72029	6.62	6.36758	6.45283	6.55995	6.25594	6.61987	6.52535	5.8026	6.09602	6.009	5.7425	5.88594	5.90105	6.1678	6.30033	6.14313	6.17152	6.33928	6.41976	6.51447	6.5391	6.30142	6.41987	6.77366	6.62643	6.46012	6.46705	5.96921	5.84316	6.20375	6.31019	92.1935	0.0768376
ENSMUSG00000002059	7.38726	7.32916	7.49849	7.40199	7.46825	7.32091	7.17874	7.29735	7.15628	7.14442	7.38258	7.44039	7.45741	7.5133	7.50376	7.48148	7.32645	7.30393	7.33884	7.12159	7.06942	7.13586	7.29214	6.51488	6.64059	6.56261	6.47699	6.54142	6.76253	6.61129	6.44519	6.4564	6.26735	5.97917	5.91894	7.40497	7.43512	7.26567	7.22776	7.47036	7.43723	7.25479	7.16581	6.5727	6.59365	6.50429	6.05515	171.133	0.0641283
ENSMUSG00000002064	9.1089	9.22335	9.14444	9.25368	9.22283	9.05335	9.11507	9.17867	9.12691	9.18223	9.22245	9.48129	9.65391	9.62679	9.57104	9.52322	9.64342	9.6283	9.5907	9.73139	9.41764	9.80927	9.69961	9.30166	9.31604	9.315	9.34368	9.27374	9.47058	9.38926	9.53134	9.55986	9.1205	9.26882	9.35408	9.1589	9.23825	9.1157	9.1772	9.58733	9.57923	9.65013	9.64217	9.3109	9.36267	9.49348	9.2478	585.358	0.13875
ENSMUSG00000002068	3.94995	3.94053	3.90386	3.85062	3.86228	4.5419	4.53559	4.57942	4.53701	4.53937	4.34113	4.90419	4.73342	4.58421	4.78761	4.79689	4.76294	5.04195	5.21987	5.05179	5.21983	5.05989	4.97673	5.15938	4.93282	5.07748	5.0523	5.14709	4.87951	5.01862	4.91566	4.77307	4.92589	4.97966	4.7167	3.93144	3.85645	4.5523	4.4725	4.74061	4.78248	5.10454	5.08548	5.05656	5.0263	4.90245	4.87408	15.0856	-0.723291
ENSMUSG00000002083	2.13605	2.12841	2.05483	2.09008	2.07324	2.34039	2.21655	2.27264	2.18271	2.23337	2.263	2.63142	2.57185	2.56675	2.57779	2.59529	2.5989	2.49314	2.62758	2.60493	2.56832	2.52452	2.71211	2.69021	2.67278	2.54035	2.70894	2.64821	2.76887	3.24896	3.10844	3.01892	3.21853	3.31897	3.34046	2.10643	2.08166	2.27653	2.22636	2.59001	2.59066	2.57521	2.60165	2.63445	2.70867	3.12544	3.29265	4.40922	-0.751347
ENSMUSG00000002100	NA	NA	NA	NA	NA	NA	NA	NA	NA	NA	NA	NA	NA	NA	NA	NA	NA	1.80216	1.99826	1.7903	1.96091	1.9172	1.86855	NA	NA	NA	NA	NA	NA	NA	NA	NA	NA	NA	NA	NA	NA	NA	NA	NA	NA	1.86358	1.91556	NA	NA	NA	NA	NA	NA
ENSMUSG00000002102	8.95461	8.94276	8.92309	8.975	8.8709	9.10594	9.27831	9.14844	9.26555	9.22463	9.19157	9.26361	9.17487	9.24782	9.17451	9.18977	9.13805	9.65838	9.44534	9.3727	9.54161	9.18186	9.51644	8.7273	8.78927	8.92393	8.80606	8.90944	9.08004	8.96808	8.84363	8.74686	8.98877	8.77961	8.9884	8.94015	8.92295	9.17756	9.22725	9.22877	9.16744	9.49214	9.4133	8.8135	8.93185	8.85286	8.91893	489.402	-0.0310987
ENSMUSG00000002103	9.58195	9.56604	9.5582	9.56455	9.59574	9.52559	9.17226	9.39397	9.39197	9.29123	9.5191	9.69041	9.98428	9.78433	9.71948	9.75033	9.88316	9.93131	9.86169	10.094	9.84836	10.4448	9.99223	10.1387	10.0642	10.0487	10.1647	9.8234	9.9106	10.022	10.2971	10.3098	10.0865	10.1942	10.1389	9.56873	9.58015	9.36394	9.40076	9.81967	9.78432	9.96233	10.0951	10.0839	9.96622	10.2096	10.1398	761.849	0.0204093
ENSMUSG00000002104	NA	NA	NA	NA	NA	NA	NA	NA	NA	NA	NA	NA	NA	NA	NA	NA	NA	NA	NA	NA	NA	NA	NA	NA	NA	NA	NA	NA	NA	2.11884	2.13474	2.29891	2.40333	2.2627	2.29575	NA	NA	NA	NA	NA	NA	NA	NA	NA	NA	2.18416	2.3206	NA	NA
ENSMUSG00000002105	5.01653	5.1643	5.22171	5.07506	5.30174	5.02823	5.0593	5.11031	4.9244	5.16635	5.15347	5.36372	5.53499	5.55544	5.53798	5.50067	5.45532	5.38946	5.44751	5.77579	5.28106	5.63732	5.51006	4.87349	4.91837	4.95725	4.79375	4.91938	5.12098	4.83262	4.92835	5.21105	4.92899	5.14754	5.26714	5.13418	5.1884	5.06595	5.08141	5.48471	5.49799	5.53759	5.47615	4.91637	4.9447	4.99068	5.11456	35.7944	0.267013
ENSMUSG00000002107	9.69759	9.72609	9.60952	9.685	9.54591	9.87704	9.88208	9.80082	9.88715	9.7785	9.68408	10.2173	10.0613	9.88351	10.0727	10.0781	10.0641	10.4852	10.4259	10.3818	10.5493	10.281	10.3898	10.047	9.97763	10.0139	10.0268	9.97499	9.79283	10.2317	10.1325	10.0098	10.0177	9.90344	9.78937	9.67773	9.61546	9.85331	9.78325	10.054	10.0716	10.431	10.4067	10.0129	9.93155	10.1247	9.90349	807.275	-0.106863
ENSMUSG00000002108	4.53531	4.70023	4.70045	4.63521	4.74285	4.42969	4.56982	4.45568	4.46678	4.49036	4.50724	4.69273	4.76232	4.80845	4.61753	4.71725	4.7331	4.8398	4.76579	4.85704	4.83786	4.85748	4.76892	3.70128	3.93676	3.74793	3.65359	3.85465	3.81671	4.5289	4.37832	4.60944	4.7506	4.64276	5.06337	4.64533	4.68903	4.48507	4.48813	4.7545	4.68929	4.82088	4.82142	3.79533	3.77499	4.50555	4.81891	25.3763	0.254456
ENSMUSG00000002109	4.23786	4.48081	4.47578	4.29131	4.23576	4.55663	4.51119	4.45053	4.46127	4.39821	4.6228	4.64696	4.51671	4.65986	4.62978	4.63147	4.44028	4.68732	4.42665	4.56727	4.64532	4.40056	4.45837	3.73393	3.68857	3.63869	3.82778	3.76554	3.74141	3.93606	4.18477	4.13831	4.05658	4.00729	3.89461	4.39815	4.26354	4.50611	4.49409	4.60784	4.56718	4.56041	4.50142	3.68706	3.77824	4.08638	3.98616	21.0699	-1.06568
ENSMUSG00000002129	8.86223	8.98727	8.84188	8.8859	8.84824	8.87237	8.57131	8.76518	8.81475	8.72959	8.84907	9.05902	9.10798	9.18162	9.03253	9.05976	9.15268	9.39204	9.2328	9.25765	9.25956	9.28928	9.12071	8.79214	8.81846	8.7199	8.7704	8.71605	8.70922	9.22711	8.99309	9.31196	8.65114	8.68	8.69578	8.89713	8.86707	8.73629	8.7978	9.1162	9.08166	9.29416	9.22318	8.77683	8.73189	9.17739	8.67564	473.786	-0.0581839
ENSMUSG00000002147	3.58858	3.56211	3.52689	3.56705	3.63096	3.34027	3.29173	3.34636	3.36862	3.44021	3.42516	4.37747	4.38751	4.20878	4.31813	4.21867	4.32046	4.09957	4.05518	4.14641	4.00291	3.94739	3.96626	3.83641	3.77204	3.87354	3.74836	3.81671	3.97727	4.14697	4.0694	4.14825	4.54156	4.61223	4.52158	3.55919	3.59901	3.32612	3.41133	4.32459	4.28575	4.10039	3.97219	3.82733	3.84745	4.12154	4.55845	11.8689	0.445236
ENSMUSG00000002190	3.53824	3.55919	3.49903	3.62532	3.50467	3.67042	3.716	3.73163	3.74871	3.67659	3.59314	4.87129	4.65782	4.47924	4.70753	4.66683	4.72423	5.18144	5.12154	5.30395	5.2954	5.32808	5.24389	6.08212	5.85417	6.00892	6.117	5.80682	5.76103	5.52114	5.81265	5.30634	5.43426	5.91175	5.96413	3.53216	3.56499	3.70602	3.67281	4.66945	4.69953	5.20231	5.28913	5.98174	5.89495	5.54671	5.77004	11.955	0.376244
ENSMUSG00000002205	7.2738	7.27264	7.34194	7.24053	7.25996	7.19808	7.22589	7.12407	7.17758	7.21258	7.27688	7.30955	7.44843	7.60015	7.39084	7.37314	7.34413	7.31182	7.25853	7.342	7.23957	7.3239	7.21356	6.61453	6.71711	6.79447	6.48483	6.71596	6.98312	6.97	6.70706	7.02977	7.17802	7.03219	6.87883	7.29613	7.25025	7.18268	7.22235	7.45271	7.36937	7.30412	7.25901	6.70871	6.72797	6.90228	7.02968	155.284	-0.107672
ENSMUSG00000002210	6.59974	6.6607	6.91128	6.7509	6.74372	6.6003	6.79462	6.65335	6.70378	6.72067	6.72564	6.7985	6.83756	6.8576	6.67796	6.76103	6.70248	6.95357	6.87874	6.93636	7.02855	6.62246	6.92636	5.77847	5.82141	5.9373	5.9057	5.7552	6.19638	6.0665	5.99897	5.98272	5.91994	5.7787	5.81571	6.72391	6.74731	6.68276	6.7167	6.83122	6.71382	6.92289	6.85912	5.84573	5.95243	6.01606	5.83812	107.256	0.0360601
ENSMUSG00000002221	6.05529	5.99373	5.93017	5.95647	5.91712	6.22749	6.07846	6.11793	6.12263	6.06998	6.14278	6.41234	6.49941	6.33122	6.43199	6.41361	6.37722	6.23758	6.40899	6.3867	6.39086	6.40814	6.42911	6.26252	6.14066	6.06846	6.11205	6.16595	5.86858	6.23584	6.32721	6.33739	6.20696	6.23487	5.92891	5.99306	5.93679	6.14129	6.1118	6.41432	6.40761	6.34443	6.40937	6.15721	6.04886	6.30015	6.12358	63.0366	-0.197435
ENSMUSG00000002222	7.46013	7.34525	7.17525	7.23441	7.25206	7.35305	7.23012	7.3426	7.25372	7.2845	7.09162	7.75144	7.64341	7.70796	7.79959	7.75767	7.68769	7.88696	8.02184	7.89981	8.03026	7.94418	7.84081	7.97969	7.89245	7.87973	7.96549	7.86575	7.60722	7.96013	8.03902	8.05023	7.68265	7.87468	7.63533	7.32687	7.24323	7.30859	7.20995	7.70094	7.74832	7.9362	7.93842	7.91729	7.81282	8.01646	7.73089	158.24	-0.206523
ENSMUSG00000002227	2.7045	2.69698	2.71581	2.67303	2.72696	3.12366	3.21279	3.11258	3.16007	3.24111	3.24903	2.87125	2.89597	2.88218	2.88842	2.97546	2.86206	2.70349	2.66663	2.6832	2.75784	2.7349	2.72208	2.40024	2.45284	2.5213	2.48941	2.4079	2.42111	3.15725	3.1325	3.29416	3.24253	3.44701	3.15877	2.70576	2.69999	3.14968	3.21674	2.88313	2.90864	2.68444	2.73827	2.45813	2.43947	3.19463	3.28277	6.44068	-0.0952015
ENSMUSG00000002233	7.16176	7.06079	7.33824	7.0735	7.37498	7.24925	7.58725	7.24145	7.36254	7.49288	7.5405	7.33845	7.43729	7.49936	7.34137	7.47559	7.35473	7.26212	7.24604	7.24837	7.15896	7.035	7.43547	6.45138	6.58806	6.31878	6.48349	6.84926	7.02366	6.84989	6.74741	7.03152	7.57847	7.62057	7.73108	7.18693	7.22424	7.35932	7.46531	7.42503	7.39056	7.25218	7.20981	6.45274	6.78547	6.87627	7.64337	148.567	0.100519
ENSMUSG00000002249	4.77945	4.74521	4.83029	4.77644	4.76221	4.75198	4.69282	4.74105	4.90186	4.7389	4.74165	4.73285	4.80264	4.88165	4.73974	4.69498	4.79101	4.87452	4.87564	4.67364	4.76979	4.85272	4.83963	3.86983	3.90018	3.96013	4.02671	4.27551	4.1035	4.51707	4.70297	4.85514	5.37181	5.15451	4.9184	4.78498	4.76932	4.72862	4.79414	4.80571	4.74191	4.80793	4.82071	3.91005	4.13524	4.69173	5.14824	27.4754	-0.0964009
ENSMUSG00000002250	5.55685	5.59909	5.54425	5.55241	5.62718	5.53929	5.5997	5.499	5.47976	5.55238	5.66359	5.61107	5.67013	5.76683	5.54738	5.70667	5.62424	5.65171	5.65965	5.71765	5.74531	5.87483	5.93096	5.17104	5.25608	5.26311	5.11243	5.26421	5.33759	5.3247	5.36008	5.66545	5.81667	5.78766	5.84929	5.56673	5.5898	5.546	5.56524	5.68267	5.6261	5.67634	5.85037	5.23008	5.23807	5.45008	5.81787	47.6662	0.098396
ENSMUSG00000002265	8.51762	8.33191	8.28295	8.24416	8.09622	8.83044	9.10357	8.9128	8.85711	8.84824	8.54102	9.19095	8.92546	8.59051	9.23579	9.17315	8.79779	9.72658	9.45166	9.58255	9.92349	9.30334	9.37294	9.16065	8.91708	8.95524	9.14291	8.83333	8.88173	9.08725	9.10789	8.82348	8.31484	8.33942	8.70959	8.37749	8.17019	8.94893	8.74879	8.90231	9.06891	9.58693	9.53326	9.01099	8.95266	9.00621	8.45462	318.218	-0.413224
ENSMUSG00000002266	2.30358	2.35948	2.35384	2.30886	2.29067	1.99435	2.04247	1.992	1.97134	2.07591	1.97708	3.07507	2.92909	3.03837	3.16211	3.01183	2.96594	2.77177	2.9324	2.93924	3.00407	3.16981	2.96813	2.94045	2.92251	2.99845	2.99504	2.9184	2.9583	3.15453	3.22947	3.29104	3.26733	3.34015	3.12775	2.33897	2.29976	2.00961	2.00811	3.01418	3.04663	2.88114	3.04734	2.9538	2.95725	3.22501	3.24508	5.09242	-1.06229
ENSMUSG00000002274	9.39518	9.48575	9.70749	9.43701	9.86433	9.35191	9.41709	9.44702	9.3809	9.73653	9.47248	9.38248	10.004	9.82227	9.53999	9.65039	9.6801	9.14639	9.71569	9.83329	9.1141	9.9875	9.87685	8.98668	8.86891	8.97543	9.10028	8.64833	9.1757	8.91873	9.3827	9.49512	8.55538	8.728	9.03849	9.52948	9.65067	9.40534	9.52997	9.73623	9.62349	9.56512	9.65948	8.94368	8.97477	9.26552	8.77395	777.788	0.231782
ENSMUSG00000002279	7.95171	8.08783	8.15219	8.00025	8.18178	7.83556	7.81063	7.97366	7.85973	8.12316	8.06334	7.8873	8.46844	8.21001	8.18222	8.20726	8.35463	8.31698	8.34944	8.5481	8.21851	8.83186	8.59768	7.97498	7.98994	7.96353	8.07383	7.76029	8.10789	8.01199	8.36763	8.31215	7.42253	7.69295	7.87157	8.06391	8.09102	7.87328	8.01541	8.18858	8.24804	8.40484	8.54935	7.97615	7.98067	8.23059	7.66235	270.617	0.0585066
ENSMUSG00000002280	6.35273	6.35307	6.43134	6.3376	6.39535	6.48075	6.68621	6.67589	6.63304	6.70494	6.72437	6.63826	6.57031	6.65531	6.54177	6.67716	6.53017	6.66537	6.50986	6.59846	6.66614	6.30844	6.69065	5.74056	5.67427	5.69578	5.84005	5.80787	5.97008	6.19426	6.18802	6.1521	6.07555	5.97357	6.25751	6.37905	6.36647	6.61428	6.68745	6.62129	6.58303	6.59123	6.55508	5.70354	5.87266	6.17813	6.10221	82.9125	-0.0361522
ENSMUSG00000002289	6.65543	6.55012	6.62687	6.46138	6.61211	6.48904	6.58183	6.49897	6.47095	6.63737	6.68094	6.63359	7.31856	6.84172	6.80671	6.78216	7.05417	7.56023	7.22995	7.61876	7.35981	7.64123	7.40126	6.90747	6.84463	6.82734	6.72587	6.92994	6.96003	7.12885	7.01067	7.56858	7.43014	7.14919	7.69847	6.61081	6.53675	6.52328	6.59642	6.93129	6.88101	7.46965	7.46743	6.85981	6.87194	7.23603	7.42593	95.9584	-0.194962
ENSMUSG00000002297	2.94399	2.86534	2.91597	2.82767	2.85271	2.60457	2.58788	2.51031	2.5646	2.56589	2.55596	2.37882	2.3592	2.3588	2.4659	2.37438	2.38204	2.52694	2.32672	2.25907	2.3874	2.36887	2.26646	2.16458	2.1055	2.10497	2.07967	2.23573	2.30267	2.57856	2.52836	2.58931	2.73725	3.02701	2.74203	2.90843	2.84019	2.56759	2.56215	2.36561	2.40744	2.37091	2.34091	2.12502	2.20602	2.56541	2.83543	7.43899	-1.30091
ENSMUSG00000002307	5.93091	6.04403	6.14161	5.96808	5.96327	5.91282	6.09801	6.02224	5.98963	5.98192	6.03738	6.31051	6.15796	6.25422	6.12813	6.19263	6.20738	6.12451	6.25855	6.25239	6.27983	6.28958	6.39269	5.64494	5.60773	5.62985	5.66655	5.67472	5.75981	6.00151	6.0002	5.99727	5.99423	5.82215	5.93536	6.03885	5.96568	6.01102	6.00298	6.24089	6.17605	6.21182	6.3207	5.62751	5.70036	5.99966	5.91725	64.8324	-0.260283
ENSMUSG00000002308	7.38339	7.45439	7.6993	7.43033	7.74226	7.39443	7.83624	7.69406	7.53826	7.79833	7.77026	7.76398	8.12189	7.95193	7.85224	7.91217	8.04446	7.92928	7.94528	8.1252	7.82656	8.2742	8.22565	7.59049	7.59112	7.49115	7.70466	7.3449	7.36421	7.6579	7.64413	7.97597	7.07969	7.53584	7.49129	7.51236	7.58629	7.64157	7.70228	7.94593	7.93629	7.99992	8.1088	7.55758	7.47126	7.75933	7.36894	188.672	0.168194
ENSMUSG00000002319	5.55639	5.42857	5.62606	5.54517	5.55701	5.74713	6.03879	5.98239	6.02026	5.91093	5.95924	5.73769	5.53517	5.63567	5.51486	5.68233	5.55023	5.61253	5.90511	5.84719	5.83769	5.58941	5.70829	4.81533	4.73204	4.83676	4.942	4.89671	4.85792	5.02636	5.20749	4.97343	4.88744	4.85814	5.344	5.53701	5.55109	5.92277	5.96348	5.63618	5.58248	5.78828	5.7118	4.79471	4.89887	5.06909	5.02986	46.7172	0.0420746
ENSMUSG00000002320	7.28258	7.37624	7.40225	7.3285	7.50578	7.36015	7.30005	7.28703	7.14779	7.41265	7.46341	7.5791	7.87473	7.75341	7.58606	7.77776	7.79506	7.66225	7.75222	7.93724	7.67927	8.05742	7.92009	7.66993	7.62256	7.71628	7.55417	7.48322	7.75268	7.61403	7.70593	7.77441	7.70653	7.7488	7.71566	7.35369	7.41714	7.31574	7.34128	7.73574	7.71962	7.7839	7.88559	7.66959	7.59669	7.69812	7.72366	166.833	0.153336
ENSMUSG00000002324	3.60957	3.63011	3.69519	3.63545	3.61081	3.15302	3.27499	3.22981	3.18925	3.20171	3.23991	3.75363	3.83585	3.76168	3.99929	3.73589	3.73237	3.49402	3.68764	3.66825	3.6453	3.59001	3.44574	2.77063	2.87014	2.82523	2.71024	2.84674	2.69721	3.80194	3.85747	4.01985	4.12998	4.20182	4.24418	3.64496	3.62313	3.21927	3.21029	3.78372	3.82251	3.61664	3.56035	2.822	2.7514	3.89308	4.192	12.4882	-0.249296
ENSMUSG00000002325	5.51273	5.64804	5.57354	5.46394	5.7293	5.70477	5.72245	5.8173	5.8745	5.73913	6.07912	6.00034	6.05414	6.05403	5.87361	5.99019	5.96756	6.12758	6.29978	6.11075	6.15643	6.09573	6.14183	5.59697	5.60034	5.6818	5.7879	6.22672	6.30651	6.00232	6.00246	5.87908	6.22478	6.45208	6.5143	5.5781	5.59662	5.74817	5.89759	6.03617	5.94379	6.17937	6.13133	5.62637	6.10705	5.96129	6.39705	48.2057	0.10609
ENSMUSG00000002326	6.90937	6.74464	6.85241	6.86253	6.81238	6.93631	6.98405	6.96301	6.82068	6.86947	6.95109	7.10489	6.78503	6.95924	6.87627	6.93069	6.74934	7.16074	7.109	6.87122	6.99191	6.60528	7.05103	5.94764	5.84458	6.11733	5.8569	5.86481	6.16973	6.66377	6.44592	6.45396	6.47275	6.35189	6.56276	6.83548	6.83746	6.96113	6.88041	6.94972	6.8521	7.04699	6.88274	5.96985	5.96382	6.52122	6.46247	114.583	-0.00263807
ENSMUSG00000002329	5.82684	5.92646	5.96072	5.95183	5.98729	6.10754	6.13586	5.95376	6.00443	6.13397	6.12962	6.33014	6.42693	6.2938	6.16155	6.36174	6.32568	6.35104	6.42563	6.49113	6.37091	6.4289	6.61463	5.90708	5.82119	5.93034	5.84039	5.87159	5.76166	6.17131	6.12623	6.10929	6.47126	6.42245	6.2919	5.90467	5.96956	6.06572	6.08934	6.35029	6.28299	6.4226	6.47148	5.88621	5.82455	6.13561	6.3952	61.0633	0.218075
ENSMUSG00000002332	9.67153	9.59551	9.82805	9.75731	9.75466	9.70152	9.71717	9.63055	9.5825	9.56474	9.73384	9.72777	9.72464	9.81236	9.78966	9.746	9.73719	9.88752	9.776	9.68569	9.70996	9.60427	9.82201	9.137	9.23311	9.27451	9.15004	10.4462	10.3098	9.59119	9.46196	9.41299	11.6598	11.5098	11.7245	9.69836	9.75599	9.68308	9.62703	9.75493	9.75762	9.78307	9.71208	9.21487	9.96871	9.48871	11.6314	847.028	0.0903262
ENSMUSG00000002341	12.0738	12.1677	12.1454	12.1295	12.2423	12.0792	12.0946	12.0042	12.0601	12.3516	12.1802	12.1625	12.5717	12.4905	12.2299	12.2986	12.4484	12.3876	12.378	12.6146	12.4569	12.8714	12.618	12.5958	12.5201	12.6184	12.5743	12.3979	12.7879	12.2015	12.63	12.6132	12.4101	12.462	12.6343	12.129	12.1859	12.0593	12.1973	12.4082	12.3257	12.46	12.6488	12.5781	12.5867	12.4816	12.5021	4557.37	0.0929689
ENSMUSG00000002342	5.90051	5.94385	6.17219	5.9854	6.22539	6.07942	6.03325	5.97082	5.87441	6.17864	6.21185	6.11901	6.61917	6.29773	6.25223	6.34725	6.30372	6.26415	6.53748	6.74698	6.39017	6.96425	6.7068	5.98079	5.8046	5.7411	5.79955	5.81561	5.90952	6.37369	6.51311	6.43441	6.45492	6.50697	6.68456	6.00552	6.1054	6.02783	6.0883	6.3453	6.30107	6.5162	6.68707	5.84216	5.84156	6.44041	6.54882	66.6692	0.324084
ENSMUSG00000002343	5.79958	5.85907	5.82882	5.81003	5.89094	5.87626	6.01819	6.00962	5.74343	6.1276	6.10228	6.20964	6.21145	5.99968	5.98009	6.16646	5.94495	6.25994	6.37152	6.31558	6.24637	5.91433	6.14945	5.16112	5.23557	5.22596	5.21335	5.25414	5.22275	5.91343	5.7271	5.57817	5.31419	5.26173	5.50555	5.82916	5.85048	5.96803	5.9911	6.14026	6.0305	6.31568	6.10339	5.20755	5.23008	5.73957	5.36049	57.1408	0.0828246
ENSMUSG00000002345	5.99621	6.0561	6.18623	6.03415	6.18122	6.108	6.0692	6.09623	5.9577	6.23859	6.29074	6.27598	6.60028	6.53869	6.22138	6.38066	6.4136	6.47757	6.5111	6.49326	6.41529	6.5331	6.5435	5.72537	5.80343	5.66271	5.48894	5.7568	5.86122	6.06925	6.20966	6.40732	6.24612	6.35939	6.53501	6.07952	6.10768	6.09114	6.16234	6.47165	6.33855	6.49398	6.4973	5.7305	5.70232	6.22874	6.38017	68.273	0.0930185
ENSMUSG00000002346	5.80973	5.81842	6.03994	5.99058	5.99142	5.97715	6.18779	6.08739	5.96641	6.209	6.20333	5.95375	6.04912	6.11347	6.13121	6.09164	6.16296	6.14909	6.37014	6.18013	6.14565	6.40355	6.35939	5.74186	5.61922	5.69165	5.56913	5.45904	5.83625	5.84954	5.48567	6.03561	5.62688	5.83762	5.73897	5.88937	5.991	6.08411	6.12625	6.03878	6.1286	6.23312	6.30286	5.68424	5.62147	5.79028	5.73449	61.3753	0.323473
ENSMUSG00000002365	6.07711	6.12314	5.95213	6.09798	6.10023	6.1952	6.36085	6.08296	6.11559	6.08569	6.23243	6.06447	6.1366	6.18433	6.18864	6.15405	5.97879	6.85306	6.62271	6.74259	6.9222	6.46265	6.8384	6.04659	6.1046	6.10231	5.9549	5.85373	6.32223	6.25412	6.16428	6.13159	6.27729	6.28601	6.2679	6.05079	6.0991	6.21301	6.14457	6.12847	6.10716	6.73946	6.74108	6.0845	6.04362	6.18333	6.27707	67.5104	0.151644
ENSMUSG00000002372	7.90184	7.91724	7.85372	7.80906	7.75781	7.95717	8.00174	7.94527	7.88582	8.06146	8.00974	8.1032	8.31362	8.14838	8.09532	8.05748	8.19552	8.13117	8.29389	8.1538	8.26408	8.20265	8.15966	7.54784	7.63865	7.57225	7.59324	7.68986	7.61147	7.91792	7.93071	7.98358	7.99149	7.76448	7.78131	7.89094	7.78343	7.96806	7.98568	8.1884	8.11611	8.19295	8.2088	7.58625	7.63152	7.94407	7.84576	231.139	-0.22581
ENSMUSG00000002379	8.57028	8.83353	8.99013	8.67231	8.95623	8.62524	8.71543	8.72876	8.71604	8.82029	8.97945	8.89446	9.07178	8.99753	8.85479	8.99975	8.96037	8.87209	9.08176	9.13275	8.78495	9.03596	9.19857	8.00291	7.97144	7.94198	7.92788	7.99909	8.14245	8.42039	8.56003	8.66265	8.56205	8.6074	8.74994	8.79798	8.81427	8.68981	8.83859	8.98792	8.93831	9.02887	9.00649	7.97211	8.02314	8.54769	8.6398	453.515	0.0229436
ENSMUSG00000002393	4.66243	4.66687	4.74035	4.7088	4.77597	4.35315	4.43751	4.35539	4.4684	4.48349	4.36218	4.81343	4.74065	4.73181	4.65103	4.64179	4.6971	4.87364	5.04968	4.96175	4.8947	5.0367	4.98907	3.83566	3.68338	3.83931	3.78049	3.7129	3.77413	4.58086	4.50113	4.66007	4.84245	4.62817	4.6226	4.68988	4.74238	4.38202	4.43802	4.76196	4.66331	4.96169	4.97349	3.78612	3.75584	4.58069	4.69774	26.0937	0.309107
ENSMUSG00000002395	6.81342	6.90301	7.09767	6.82597	7.01535	6.95236	7.1737	7.10524	7.09146	7.20842	7.41031	7.19729	7.42754	7.39855	7.18714	7.26239	7.3532	7.50333	7.35553	7.26081	7.3108	7.37857	7.4125	6.44372	6.58825	6.47066	6.30199	6.53864	6.74565	6.86686	6.68245	7.04516	7.01781	6.94475	7.01048	6.93803	6.92066	7.0771	7.23673	7.34113	7.26758	7.37322	7.36729	6.50088	6.52876	6.86482	6.99101	122.862	-0.0469872
ENSMUSG00000002396	2.9281	3.01001	3.0004	3.03977	2.99098	2.20769	2.17901	2.22447	2.2079	2.30643	2.273	2.91551	2.92004	2.92016	2.94319	2.86189	2.83423	3.05711	3.04085	2.93155	3.01417	3.17629	3.17224	NA	NA	NA	NA	NA	NA	2.91805	2.80195	2.84632	2.82884	2.77849	2.88931	2.9795	3.01538	2.20372	2.26244	2.91857	2.87977	3.00984	3.1209	NA	NA	2.85544	2.83221	8.06054	0.547555
ENSMUSG00000002409	4.99569	5.01619	5.00463	4.87098	4.97438	5.06215	4.92915	5.01185	5.08096	5.16601	5.01126	5.15763	5.0328	5.08238	5.18168	5.16376	5.19218	5.22678	5.38039	5.32155	5.43717	5.51309	5.44367	5.07393	5.05841	4.97278	5.03613	5.00201	4.9617	5.08372	5.19275	5.12776	5.00612	5.16731	4.94519	5.0055	4.92268	5.00105	5.08608	5.09094	5.17921	5.30958	5.46464	5.03504	4.99995	5.13474	5.03954	31.4583	-0.423706
ENSMUSG00000002413	7.72594	7.67328	7.49453	7.66797	7.43451	7.86752	7.64955	7.71718	7.73805	7.64148	7.47286	8.28531	8.06312	7.93378	8.11024	8.17136	8.108	8.4919	8.50445	8.42624	8.65595	8.46723	8.35597	8.47568	8.43171	8.52081	8.46323	8.40664	8.20098	8.42276	8.5344	8.42955	8.66513	8.59382	8.40148	7.63125	7.55124	7.74475	7.61747	8.09407	8.12987	8.47419	8.49305	8.47607	8.35695	8.46224	8.55348	196.201	-0.173801
ENSMUSG00000002416	7.26881	7.18296	7.22948	7.25767	7.2176	7.48927	7.62452	7.40269	7.54932	7.66796	7.56414	7.49342	7.95016	7.66436	7.4731	7.78098	7.78334	7.6445	7.54714	7.69879	7.47967	7.65359	7.76567	7.11611	6.89367	6.99027	6.93932	6.97949	7.0706	7.21195	7.29226	7.44071	7.29084	7.54598	7.36756	7.22708	7.23764	7.50549	7.59381	7.70265	7.67914	7.63014	7.63298	7.00002	6.99647	7.31498	7.40146	150.396	0.0218074
ENSMUSG00000002428	5.51322	5.59833	5.63112	5.63111	5.55701	5.62243	5.74533	5.80194	5.63746	5.484	5.50904	5.89911	5.58967	5.65068	5.78393	5.83208	5.68058	6.65979	6.30861	6.01069	6.81921	6.09378	6.28953	5.85495	5.93372	6.03169	6.10712	5.93518	5.99562	5.93158	5.92301	5.66291	5.61953	5.40308	5.58687	5.58089	5.59406	5.72323	5.5435	5.71316	5.76553	6.32636	6.40084	5.94012	6.01264	5.83916	5.53649	48.2362	0.0447959
ENSMUSG00000002455	7.23033	7.13944	7.34701	7.19527	7.176	7.59209	7.89511	7.6331	7.56084	7.60147	7.69028	7.66234	7.44706	7.56635	7.60741	7.67043	7.45481	8.09119	7.80754	7.80097	8.2324	7.43656	7.87761	6.73671	6.84994	6.77802	6.86148	6.71773	6.91944	7.21827	7.02494	6.83898	6.74043	6.47654	6.91988	7.23893	7.18564	7.70676	7.61753	7.55858	7.57755	7.8999	7.84885	6.78822	6.83288	7.0274	6.71228	149.378	-0.135811
ENSMUSG00000002458	4.49766	4.60924	4.67526	4.5751	4.60261	4.72009	4.88659	4.95333	4.71721	4.89946	4.82587	5.16517	5.06123	4.99405	5.05192	5.0919	5.10211	5.34754	5.62165	5.26413	5.41384	5.52738	5.37517	4.95137	4.80584	4.77014	4.86785	4.71806	4.81423	5.20514	5.22353	5.14035	5.16448	5.38546	5.51587	4.59405	4.58885	4.85334	4.81418	5.07348	5.08198	5.41111	5.4388	4.84245	4.80005	5.18968	5.35527	24.1883	-0.0478645
ENSMUSG00000002459	8.90632	8.92069	9.00604	9.09503	8.94051	9.04839	8.94724	8.9614	9.06759	8.92264	9.02137	9.13457	9.10219	9.326	9.09808	9.00731	9.09345	9.26252	9.11181	9.02777	9.13114	8.93524	9.0652	8.73769	8.8845	8.95635	8.78801	8.9434	9.32675	8.58265	8.73052	8.80227	9.0295	9.00866	8.98693	8.94435	9.01777	8.98568	9.00387	9.18759	9.06628	9.13403	9.04386	8.85952	9.01938	8.70514	9.00836	504.339	0.132852
ENSMUSG00000002475	11.4755	11.5321	11.5808	11.6659	11.6702	11.55	11.584	11.5152	11.5148	11.5626	11.5859	11.6042	11.8661	11.8819	11.6861	11.755	11.7972	11.7038	11.6862	11.8517	11.4816	11.831	11.843	11.4549	11.4712	11.3387	11.388	11.3176	11.6501	11.1557	11.3329	11.611	10.8416	11.0778	11.2422	11.5295	11.668	11.5497	11.5544	11.7841	11.7461	11.7473	11.7185	11.4216	11.4519	11.3665	11.0539	3081.01	0.222237
ENSMUSG00000002477	7.46511	7.39646	7.27607	7.50081	7.27932	7.58609	7.33832	7.47643	7.53688	7.2829	7.40609	7.62703	7.56139	7.79511	7.6209	7.61214	7.66503	7.98407	7.82759	7.75103	7.79972	7.67822	7.68901	7.67886	7.7462	7.81863	7.65139	7.84594	7.75804	7.46041	7.25223	7.54784	7.79983	7.40174	7.44225	7.37921	7.39007	7.46695	7.40862	7.66118	7.63269	7.85423	7.72231	7.7479	7.75179	7.42016	7.54794	168.456	0.0264989
ENSMUSG00000002486	3.73309	3.67544	3.60426	3.66873	3.68203	3.62306	3.73049	3.68638	3.59702	3.67532	3.81475	3.98835	4.08922	4.27456	4.20743	4.16473	4.16189	3.99337	3.78979	3.90352	3.8985	3.88142	3.79812	3.30213	3.33912	3.29499	3.25708	3.38786	3.53555	3.45749	3.45443	3.33342	3.37161	3.38842	3.61051	3.67093	3.67538	3.67998	3.69569	4.11738	4.17802	3.89556	3.85935	3.31208	3.39349	3.41511	3.45685	12.8562	0.0356096
ENSMUSG00000002489	6.43691	6.44126	6.14097	6.00051	6.12405	6.69861	6.65858	6.67894	6.50811	6.68409	6.39921	7.18128	6.74588	6.57648	6.8823	7.05958	6.93321	7.14437	7.32378	7.19627	7.43653	7.20904	7.08489	7.05632	6.80206	6.83268	6.95801	6.95315	6.50569	7.25539	6.95358	6.99249	6.89479	6.88001	6.69023	6.33971	6.06228	6.67871	6.53047	6.83455	6.95836	7.22147	7.24349	6.89702	6.80562	7.06715	6.82168	77.671	-0.899969
ENSMUSG00000002496	8.87832	8.83826	8.9497	8.72188	8.92891	8.8451	8.94945	8.8886	8.92563	9.02052	9.07523	9.19836	9.26213	9.24313	8.99343	9.16777	9.18381	8.98181	8.98995	8.86414	8.82806	9.00658	8.92799	8.73234	8.90121	8.69902	8.71406	8.78701	8.5526	8.80103	8.76066	8.88825	8.65468	8.72203	8.91268	8.88876	8.82539	8.89438	9.00713	9.23454	9.11501	8.9453	8.92088	8.77752	8.68456	8.81665	8.76313	467.217	-0.105374
ENSMUSG00000002504	4.73021	4.70846	4.6747	4.66487	4.6456	5.04866	5.29023	4.97279	4.94897	5.14145	5.11291	5.0398	4.99552	5.02897	5.18022	5.0439	4.99164	5.25804	5.15219	5.196	5.13336	5.15933	5.32379	4.28415	4.18576	4.31985	4.26856	4.20898	4.29732	4.86095	4.67592	4.67181	4.89235	4.81186	5.08329	4.70446	4.65524	5.10389	5.06778	5.02143	5.07192	5.20208	5.2055	4.26325	4.25829	4.73623	4.92917	25.8609	-0.303112
ENSMUSG00000002524	9.75466	9.88133	9.82756	9.83099	9.79286	9.86347	9.86164	9.85482	9.86901	9.94934	9.98482	9.96702	10.187	10.082	9.96798	10.0581	10.1159	10.2639	10.1563	10.1176	10.1322	10.1129	10.139	9.4595	9.54469	9.32512	9.43683	9.43523	9.49163	9.65696	9.52693	9.75047	9.35344	9.3085	9.31566	9.82118	9.81192	9.85998	9.93439	10.0787	10.0473	10.1793	10.128	9.4431	9.45456	9.64479	9.32587	903.297	-0.0180576
ENSMUSG00000002546	7.95184	7.86351	7.92957	7.90713	7.89208	7.93744	8.02061	7.93004	8.01033	8.01767	8.08993	8.19314	8.2804	8.19273	8.1261	8.21006	8.21303	8.55056	8.46588	8.45425	8.55364	8.40298	8.4102	7.67908	7.61251	7.63826	7.64326	7.6397	7.53752	8.08534	8.04144	7.93783	8.00901	7.90795	7.67838	7.91497	7.89961	7.9627	8.03931	8.22209	8.18306	8.49023	8.45561	7.64329	7.60683	8.02154	7.86511	240.475	-0.0338677
ENSMUSG00000002550	5.11128	5.16986	5.39304	5.19167	5.3172	5.06122	5.10269	5.11211	5.16026	5.30097	5.25202	5.31228	5.65703	5.50087	5.19443	5.47063	5.49335	5.30168	5.48354	5.56592	5.16633	5.45664	5.58544	4.1868	4.03945	4.13155	4.08052	4.03222	4.20461	5.12148	5.17064	5.30578	5.22027	5.34093	5.33435	5.22473	5.25443	5.09201	5.23775	5.49006	5.38614	5.45038	5.4028	4.11926	4.10578	5.1993	5.29852	37.9542	0.110367
ENSMUSG00000002578	2.02967	2.04684	2.00991	1.96718	2.01064	2.31356	2.36177	2.37016	2.35634	2.30297	2.36439	3.26574	3.21679	3.02291	3.11582	3.01651	3.05617	3.13649	3.16447	3.06934	3.37695	3.23567	3.13321	2.72731	2.66869	2.87512	2.7674	2.66557	2.72485	2.99415	3.00127	3.12934	2.96171	3.09516	3.05155	2.02881	1.98891	2.3485	2.34123	3.16848	3.06283	3.12343	3.24861	2.75704	2.71927	3.04159	3.03614	4.05419	-1.29595
ENSMUSG00000002580	7.93457	8.03016	8.27006	7.95096	8.05456	8.02779	8.12137	8.03783	8.0644	8.16265	8.04648	8.43261	8.37362	8.41197	8.25431	8.30993	8.36633	8.35066	8.36114	8.34641	8.36421	8.53028	8.38965	8.09179	8.07838	7.8897	7.99394	8.10365	7.9734	8.36101	8.40591	8.33766	8.45988	8.42465	8.56604	8.07826	8.00276	8.06233	8.09117	8.40607	8.31019	8.35274	8.42804	8.01996	8.02366	8.36819	8.48353	267.028	-0.168136
ENSMUSG00000002602	10.4234	10.5774	10.5426	10.5462	10.6867	10.4082	10.4776	10.3554	10.3972	10.6615	10.6385	10.5482	11.0353	10.9051	10.5826	10.6925	10.8895	10.6877	10.7083	10.9806	10.5853	11.2188	11.0157	10.6808	10.6813	10.7454	10.612	10.3554	10.7972	10.7056	10.812	11.1445	10.4819	10.7265	10.7053	10.5145	10.6164	10.4137	10.5657	10.8295	10.7216	10.7922	10.9399	10.7025	10.5882	10.8874	10.6379	1510.21	0.170371
ENSMUSG00000002603	3.28319	3.33954	3.25672	3.26989	3.25631	3.02095	3.02449	3.02396	2.98623	2.96699	3.07294	3.28658	3.31192	3.28548	3.37164	3.22729	3.25292	2.88749	2.75414	3.00758	2.7908	2.71834	2.88639	2.9434	2.99121	3.13622	2.92559	3.21901	2.99514	3.2754	3.24087	3.42049	3.66475	3.80516	3.64741	3.29315	3.2631	3.02313	3.00872	3.29466	3.28395	2.88307	2.79851	3.02361	3.04658	3.31225	3.70577	9.85488	-0.416857
ENSMUSG00000002608	6.70002	6.77858	6.88004	6.66585	6.76544	6.81323	7.20246	6.90636	7.10568	7.13095	7.22399	7.16369	7.25868	7.2291	7.20535	7.13358	7.24367	7.31262	7.27726	7.16494	7.35997	7.19409	7.34704	6.19585	6.32754	6.19706	6.11129	6.18887	6.34085	6.61128	6.64004	6.6134	6.2741	6.40035	6.49447	6.78621	6.71565	6.97402	7.15354	7.21716	7.1942	7.25161	7.30037	6.24015	6.21367	6.62157	6.38964	108.582	-0.187373
ENSMUSG00000002617	5.19184	5.1596	5.08685	5.17252	5.07944	5.20146	5.14329	5.28446	4.99404	4.96367	5.02705	5.33045	5.18433	5.26054	5.53054	5.35843	5.26606	5.89538	5.59845	5.46836	5.94811	5.4444	5.55838	5.46112	5.51924	5.52494	5.66394	5.5433	5.5081	5.28869	5.36132	4.94991	5.03775	4.89655	4.93988	5.1461	5.12598	5.20974	4.99492	5.25844	5.38501	5.65406	5.6503	5.50177	5.57178	5.19997	4.95806	35.5374	-0.10154
ENSMUSG00000002625	5.03719	4.92118	5.01789	4.96309	4.95468	4.92315	5.15887	5.07383	4.89342	5.07524	4.96178	5.43013	4.99649	5.2228	5.31897	5.31758	5.23513	5.5561	5.75853	5.78714	5.89779	5.45994	5.81166	5.19089	5.31289	5.68031	5.24801	5.1805	5.31723	5.48352	5.73958	5.33687	5.38475	5.39224	5.44796	4.99209	4.95888	5.05195	4.97681	5.21647	5.29056	5.70059	5.72313	5.3947	5.24858	5.51999	5.40832	31.6229	-0.182093
ENSMUSG00000002633	2.13402	2.12509	2.14801	2.09973	2.09694	NA	NA	NA	NA	NA	NA	2.3789	2.38225	2.29876	2.39141	2.39908	2.33021	3.30995	3.33876	3.53023	3.31621	3.63022	3.40358	3.2868	2.89992	2.97356	2.87552	2.87541	2.81037	3.1955	3.08893	3.1281	3.10816	3.15273	3.18928	2.13571	2.09834	NA	NA	2.3533	2.37357	3.39298	3.45001	3.05343	2.85377	3.13751	3.15006	4.38595	-1.1567
ENSMUSG00000002635	5.46642	5.32926	5.43677	5.41864	5.41891	5.55825	5.71984	5.72165	5.65004	5.65264	5.70537	5.81087	5.61999	5.55872	5.634	5.6667	5.59	5.60662	5.73744	5.41693	5.68354	5.44596	5.70353	4.93254	5.08481	5.18313	5.03979	4.90618	5.1911	5.49658	5.37673	5.23705	5.35582	5.36357	5.4448	5.41082	5.41877	5.66658	5.66935	5.66319	5.63023	5.58699	5.61101	5.06682	5.04569	5.37012	5.38806	42.6987	0.0256038
ENSMUSG00000002658	6.98347	7.0049	6.93555	6.93135	6.97593	7.21998	7.29913	7.24197	7.29078	7.16337	7.34586	7.3375	7.16009	7.25631	7.45443	7.21175	7.15989	7.71108	7.56478	7.5101	7.84082	7.32568	7.54788	6.88554	6.92784	6.981	6.90195	6.72318	7.1886	6.96026	6.93906	7.03414	6.74527	6.71262	6.76157	6.97464	6.95364	7.25369	7.26667	7.2513	7.27536	7.59532	7.57146	6.93146	6.93791	6.97782	6.73982	125.116	-0.0499895
ENSMUSG00000002660	7.24014	7.21165	7.46082	7.2011	7.33227	7.32163	7.2075	7.1744	7.23865	7.26997	7.51928	7.19951	7.48627	7.39831	7.11408	7.29136	7.24756	7.37214	7.32446	7.26099	7.10124	7.30278	7.35213	6.51286	6.68038	6.50659	6.51677	6.5104	6.7497	6.88432	6.85363	7.21587	7.14468	7.10256	7.19813	7.3042	7.26669	7.23451	7.34263	7.36136	7.21767	7.3192	7.25205	6.56661	6.59229	6.98461	7.14846	157.246	-0.0941151
ENSMUSG00000002661	6.61046	6.58852	6.7554	6.80067	6.75127	6.66418	6.70058	6.77483	6.62697	6.71338	6.77943	6.76894	6.81473	6.88031	6.52237	6.78707	6.69027	6.75453	6.95981	6.72917	6.64873	6.65415	6.88159	5.80834	5.69587	5.82899	5.82077	5.82031	5.9606	6.32452	6.2042	6.3067	5.87923	5.76482	6.08151	6.65146	6.77597	6.71319	6.70659	6.82132	6.66657	6.81451	6.72816	5.77773	5.86723	6.27848	5.90852	104.583	0.319751
ENSMUSG00000002679	6.62681	6.62874	6.47665	6.7405	6.60441	6.6691	6.64061	6.68888	6.73346	6.50009	6.63902	6.83489	6.79314	7.0352	6.96235	6.90562	6.81236	7.18903	7.11149	7.05234	7.14051	6.75057	7.13634	6.56407	6.6182	6.55795	6.59683	6.57979	6.69573	6.58839	6.69797	6.62432	6.64089	6.55944	6.50659	6.5774	6.67246	6.6662	6.62419	6.88774	6.89344	7.11762	7.00914	6.58007	6.62412	6.6369	6.56897	98.8921	0.254985
ENSMUSG00000002688	7.56555	7.53291	7.71785	7.74496	7.65682	7.59087	7.46692	7.53931	7.53139	7.3679	7.6597	7.65527	7.50202	7.75592	7.5614	7.66062	7.55574	7.71522	7.53926	7.36219	7.57525	7.19673	7.36726	6.90261	7.02904	6.99482	6.92179	7.15306	7.10945	7.03649	6.87786	7.25628	7.1659	6.99726	6.99713	7.60544	7.70089	7.53237	7.51966	7.63773	7.59259	7.53889	7.37975	6.97549	7.06144	7.05688	7.05343	200.868	0.1956
ENSMUSG00000002699	2.10039	2.09138	2.10325	2.07982	2.0544	NA	NA	NA	NA	NA	NA	NA	NA	NA	NA	NA	NA	2.13257	2.20336	2.16852	2.31805	2.32105	2.17122	2.8042	2.7857	2.76815	2.8198	2.72147	2.76025	2.66073	2.66088	2.64208	2.74812	2.70197	2.66808	2.09834	2.06711	NA	NA	NA	NA	2.16815	2.2701	2.78602	2.76717	2.65457	2.70606	4.31446	-0.982895
ENSMUSG00000002718	9.42837	9.29247	9.16623	9.39534	9.26398	9.59215	9.35565	9.44216	9.4545	9.19317	9.24102	9.84762	9.393	9.60117	9.81137	9.6028	9.64805	10.1045	9.85722	9.73771	10.0466	9.67844	9.71838	9.60049	9.57356	9.59283	9.64677	9.6856	9.48853	9.66191	9.53475	9.51126	9.1971	9.20823	9.06673	9.29569	9.32966	9.46332	9.29623	9.61393	9.68741	9.89982	9.81448	9.58896	9.60696	9.56931	9.15735	637.919	0.052802
ENSMUSG00000002728	6.14803	5.96975	6.07448	6.13673	6.13729	6.16019	6.00121	6.25539	6.14222	6.30552	6.16501	6.55871	6.29741	6.47647	6.47172	6.4903	6.44947	6.46312	6.67674	6.68747	6.59931	6.60032	6.59206	6.06859	6.04772	6.34965	6.15077	6.16401	6.17236	6.37174	6.48001	6.30384	6.31268	6.6287	6.3889	6.06409	6.13701	6.13893	6.20425	6.44419	6.4705	6.60911	6.59723	6.15532	6.16238	6.3852	6.44343	68.4851	0.225892
ENSMUSG00000002731	7.64482	7.58821	7.46412	7.62859	7.49048	7.60053	7.39009	7.40638	7.51093	7.32012	7.39971	7.56818	7.64195	7.73243	7.71661	7.66933	7.6148	7.8829	7.61942	7.51472	7.64045	7.4444	7.61723	7.14322	7.2712	7.07232	7.14204	7.25663	7.12416	7.08418	6.98316	7.15222	7.18473	6.94996	7.09119	7.56571	7.55953	7.46567	7.41025	7.64752	7.66692	7.67235	7.56736	7.16225	7.17428	7.07319	7.07529	190.149	-0.0173344
ENSMUSG00000002732	6.31437	6.30055	6.35586	6.37602	6.23784	6.27694	5.91213	6.07159	5.9336	5.91598	6.02936	6.13482	6.21746	6.4699	6.45468	6.33968	6.28399	6.55801	6.4206	6.44791	6.28354	6.62894	6.54112	6.69257	6.57641	6.61451	6.68899	6.78812	6.87212	6.30529	6.55967	6.57742	7.25623	7.24151	7.09936	6.3236	6.30693	6.08689	5.95965	6.27406	6.35945	6.47551	6.48453	6.62783	6.78308	6.48079	7.19903	80.0893	-0.0519001
ENSMUSG00000002733	5.8977	5.9574	5.9745	5.92721	5.94928	5.89764	5.93173	5.91327	5.93157	6.0213	5.73973	6.2171	6.2261	6.20095	6.12793	6.21718	6.1454	6.19294	6.28048	6.23907	6.13037	6.19382	6.32861	5.94372	5.93584	6.2074	6.05282	6.06667	6.08891	5.7526	6.14048	6.33028	6.16855	6.16198	6.332	5.9432	5.93825	5.91421	5.89753	6.21471	6.1635	6.23749	6.2176	6.02899	6.06947	6.07445	6.22084	61.4466	-0.0177602
ENSMUSG00000002741	7.98083	7.96052	8.0833	7.95251	7.96875	7.9647	8.11472	7.97502	8.10196	8.05821	8.08369	8.11611	8.16737	8.14427	8.02995	8.18207	8.16522	8.16352	8.21348	8.18493	7.98182	8.10653	8.19229	7.79574	7.81624	7.85337	7.612	7.83195	7.80862	8.11932	8.01768	8.16787	8.33467	8.3094	8.24264	8.00822	7.96063	8.01815	8.08129	8.14258	8.12575	8.18731	8.09355	7.82178	7.75086	8.10162	8.29557	254.424	-0.100037
ENSMUSG00000002748	8.22595	8.14136	8.24026	8.17511	8.18181	8.51242	8.55903	8.45775	8.40823	8.25508	8.47885	8.43571	8.11839	8.31637	8.56375	8.3918	8.08404	8.96386	8.63146	8.46786	9.05704	8.09574	8.46524	7.75288	7.83818	7.80926	7.89729	7.76443	7.86987	8.0199	7.8584	7.7939	7.25564	7.55107	7.42069	8.20252	8.17846	8.50973	8.38072	8.29015	8.34653	8.68773	8.53934	7.80011	7.84386	7.89073	7.40914	292.822	-0.0497125
ENSMUSG00000002763	5.45341	5.3464	5.67595	5.30632	5.52885	5.4397	5.70741	5.58733	5.54037	5.75734	5.69464	5.82794	5.7789	5.93479	5.86908	5.91046	5.85502	5.71364	5.81064	5.84437	5.83895	5.74422	5.75006	4.65428	4.92462	4.67897	4.75241	4.66169	4.77835	4.98295	4.73351	5.02749	4.63809	4.478	4.77855	5.49192	5.41759	5.57815	5.66412	5.84721	5.87819	5.78955	5.77774	4.75262	4.73082	4.91465	4.63155	44.6917	-0.319629
ENSMUSG00000002767	7.35302	7.42826	7.22747	7.30503	7.21012	7.31038	7.27208	7.1581	7.31858	7.20575	7.34028	7.34977	7.38581	7.43946	7.34328	7.35834	7.36982	7.39195	7.44675	7.42234	7.35988	7.34674	7.50123	6.98692	6.92447	7.00187	6.97801	6.99969	7.23327	6.99618	6.93957	7.04081	7.33029	7.3499	7.09626	7.33625	7.25757	7.24685	7.28821	7.39168	7.35715	7.42035	7.40262	6.97109	7.07032	6.99219	7.25882	159.22	-0.188479
ENSMUSG00000002768	7.70632	7.64266	7.76214	7.63832	7.63879	7.74438	7.88017	7.73103	7.9344	7.86846	7.88927	7.94362	8.06364	7.96787	7.94086	7.96741	8.01723	8.02027	7.97409	8.00468	7.87605	8.07056	8.10179	7.55746	7.58709	7.47733	7.45887	7.54677	7.5654	7.91855	7.86486	7.8698	8.00052	7.93316	8.05586	7.7037	7.63855	7.78519	7.89738	7.99171	7.97517	7.99968	8.01613	7.54063	7.52368	7.8844	7.99651	205.079	-0.143168
ENSMUSG00000002771	3.25701	3.31331	3.26302	3.21727	3.21394	3.36856	3.40754	3.46278	3.41331	3.4358	3.42043	3.76195	3.96173	3.68733	3.73769	3.8923	3.82849	4.13062	4.19922	4.48706	4.27832	4.54026	4.26002	3.75767	3.57822	3.44367	3.57193	3.51985	3.45775	4.2827	4.43416	4.3833	4.18466	4.20992	4.23173	3.27778	3.2156	3.41296	3.42318	3.80367	3.81949	4.2723	4.35954	3.59319	3.51651	4.36672	4.20877	9.67151	-0.905083
ENSMUSG00000002778	9.00235	9.09642	9.26446	9.13948	9.38133	8.93614	8.90662	9.08871	8.92259	9.04918	9.0459	9.36389	9.61004	9.50612	9.39871	9.50829	9.65793	9.57757	9.71694	9.88521	9.56567	10.1691	9.80676	9.63708	9.52667	9.62873	9.63594	9.37175	9.45433	9.5687	9.81818	9.74529	9.48155	9.55604	9.59287	9.12108	9.26041	8.97716	9.00589	9.49335	9.52164	9.72657	9.84718	9.59749	9.48734	9.71072	9.54349	584.173	0.249993
ENSMUSG00000002781	6.36027	6.59459	6.60898	6.40469	6.56582	6.552	6.63159	6.64448	6.68545	6.58198	6.68579	6.74969	6.74777	6.93367	6.89263	6.78099	6.77701	6.71831	6.90764	6.79973	6.75446	6.78163	6.68365	5.95388	6.04592	5.87185	5.85529	6.07885	5.97069	6.40575	6.18819	6.31011	6.12319	5.95791	6.19657	6.52128	6.48525	6.60936	6.65107	6.81038	6.81687	6.80856	6.73991	5.95722	5.96828	6.30135	6.09256	91.59	-0.105966
ENSMUSG00000002797	4.91785	4.79623	4.87656	4.88054	4.85826	4.9036	4.80606	4.92874	4.94413	4.73938	4.78018	5.18181	4.99149	5.14409	5.13839	5.06832	5.07507	5.21311	5.24971	5.08063	5.32943	5.09623	5.15265	5.08882	5.12785	5.18968	5.27616	5.27576	5.27699	5.29915	5.08843	5.13729	4.979	4.82836	5.10423	4.86354	4.8694	4.87947	4.82123	5.1058	5.09393	5.18115	5.19277	5.13545	5.2763	5.17496	4.97053	29.2322	0.0232948
ENSMUSG00000002799	3.13438	3.09562	3.07136	3.00718	2.98139	3.97188	3.98805	4.09118	4.09075	4.07377	3.91467	4.47856	4.41439	4.09034	4.21242	4.4777	4.35741	4.98511	5.23988	5.06885	5.03582	5.56964	5.12829	4.98843	4.88017	4.8286	5.10256	4.7165	4.62943	5.43691	5.18282	5.04177	5.01397	5.12483	5.20302	3.10045	2.99429	4.01704	4.0264	4.32776	4.34918	5.09795	5.24459	4.89907	4.81616	5.2205	5.11394	8.60468	-2.006
ENSMUSG00000002803	5.31287	5.31881	5.24892	5.22686	5.29612	5.42723	5.46912	5.55151	5.58552	5.40891	5.62617	5.57919	5.79684	5.62347	5.48418	5.74296	5.72196	5.57493	5.65823	5.69975	5.61173	5.73211	5.76922	5.32378	5.21734	5.12598	5.17323	5.23711	5.36099	5.62368	5.60518	5.54999	5.88989	5.91312	5.69007	5.29354	5.26149	5.48262	5.5402	5.6665	5.6497	5.6443	5.70435	5.22237	5.25711	5.59295	5.83103	38.9182	-0.138681
ENSMUSG00000002804	5.18633	5.16938	5.15169	5.18151	5.30343	5.28562	5.37188	5.36321	5.24657	5.34617	5.27885	5.43135	5.46881	5.48809	5.32957	5.52945	5.43254	5.34568	5.60684	5.44385	5.20061	5.44215	5.28759	4.70077	4.74095	4.94045	4.74385	4.74352	4.72106	5.27089	5.25627	5.21039	5.28151	5.30396	5.66227	5.16913	5.24247	5.34024	5.29053	5.46275	5.43052	5.46545	5.31012	4.79406	4.73614	5.24585	5.41591	36.6585	0.353387
ENSMUSG00000002808	10.4167	10.4289	10.3247	10.4552	10.3213	10.4508	10.0143	10.2628	10.1804	10.1102	10.1093	10.5084	10.5603	10.5456	10.7045	10.5419	10.6367	10.6678	10.8415	10.9538	10.6866	10.9937	10.8044	10.9112	10.8181	10.8417	10.8215	10.9428	10.9857	10.7125	10.7641	10.802	10.7237	10.7812	10.9699	10.3901	10.3883	10.2426	10.1333	10.5381	10.6277	10.821	10.8282	10.857	10.9166	10.7595	10.8249	1343.77	-0.00201649
ENSMUSG00000002812	8.23235	8.09752	8.47653	8.21078	8.36578	8.15944	8.30785	8.29639	8.2851	8.30063	8.47212	8.30281	8.39754	8.52924	8.20113	8.387	8.26273	8.32453	8.30328	8.25183	8.21875	8.17914	8.35147	7.37621	7.65241	7.66859	7.4651	7.62775	7.69435	7.60662	7.52605	7.78133	7.84388	7.67804	7.68313	8.2688	8.28828	8.25456	8.35261	8.40986	8.28362	8.29321	8.24979	7.56574	7.59573	7.638	7.73502	313.085	0.0209167
ENSMUSG00000002814	5.00989	4.91559	4.92354	4.88379	4.93784	4.92207	4.83204	4.83543	4.81118	4.68062	4.90553	4.71879	4.84978	4.87181	4.82683	4.89815	4.84599	4.5827	4.57799	4.46675	4.48283	4.49059	4.62729	4.07741	4.10679	4.02428	4.0051	4.09851	4.1472	4.34032	4.25027	4.32862	4.31409	4.38634	4.22329	4.94967	4.91082	4.86318	4.79911	4.81346	4.85699	4.54248	4.53357	4.06949	4.0836	4.3064	4.30791	30.6242	-0.205933
ENSMUSG00000002820	4.08828	4.11197	4.07311	4.01203	4.12196	4.19913	4.17192	4.2738	4.18749	4.35643	4.35225	4.25936	4.30138	4.39592	4.27021	4.28425	4.28292	4.02863	4.20163	3.98523	4.13683	4.20009	4.08043	3.55831	3.60232	3.45108	3.56208	3.67555	3.53214	4.06568	3.97373	3.88059	3.79844	3.81939	3.78798	4.09112	4.067	4.21495	4.29873	4.31888	4.27913	4.07183	4.13912	3.53724	3.58992	3.97333	3.80194	16.8774	-0.18025
ENSMUSG00000002825	4.05295	3.98343	4.03795	4.02568	4.10775	3.97822	4.0397	4.12428	4.10815	4.1246	4.11606	4.27812	4.33689	4.32595	4.28489	4.39842	4.43128	4.46287	4.50773	4.52272	4.47158	4.42808	4.59917	3.33214	3.38481	3.39652	3.37902	3.26656	3.42198	3.84152	3.81815	3.99522	3.81188	3.85987	4.10745	4.02477	4.06671	4.0474	4.11627	4.31365	4.37153	4.49778	4.49961	3.37116	3.35585	3.88497	3.9264	16.3591	0.35808
ENSMUSG00000002831	4.47588	4.5113	4.57133	4.51978	4.62306	4.43682	4.56317	4.64657	4.6261	4.4657	4.64551	4.92652	5.11264	5.22586	5.14315	5.12138	5.24211	5.52702	5.14421	5.44955	5.26223	5.51146	5.22429	4.82079	4.86269	5.04812	4.92814	5.1156	5.09212	6.43824	6.21339	6.778	8.66338	8.19484	7.64297	4.5195	4.57142	4.54885	4.5791	5.08834	5.16888	5.37359	5.33266	4.91053	5.04529	6.47655	8.16706	23.1604	0.338043
ENSMUSG00000002833	7.51516	7.46707	7.43211	7.39716	7.35333	7.58879	7.92308	7.64178	7.75059	7.67239	7.81967	7.80945	7.73432	7.86956	7.8595	7.81406	7.71439	8.27529	7.99458	7.78902	8.16337	7.72208	7.91012	6.87764	6.97757	6.92202	7.03392	6.9603	6.99169	7.30709	7.20758	7.00563	6.82008	6.91604	7.0197	7.47145	7.37525	7.71788	7.74755	7.80445	7.79598	8.01963	7.93186	6.92574	6.9953	7.17344	6.91861	173.372	-0.219276
ENSMUSG00000002835	3.81647	3.79208	3.81448	3.81018	3.77382	4.04271	4.06732	3.96046	3.98846	3.98218	3.98448	3.9361	3.85449	3.89745	3.80697	3.89514	3.95094	4.12719	4.1664	4.13639	4.25576	4.00756	4.14496	3.34059	3.26052	3.23484	3.32695	3.27371	3.25065	3.47212	3.34231	3.4669	3.46921	3.51537	3.46192	3.80768	3.792	4.0235	3.98504	3.89601	3.88435	4.14333	4.13609	3.27865	3.28377	3.42711	3.48217	14.0095	-0.158822
ENSMUSG00000002844	9.28657	9.30991	9.30991	9.29523	9.28212	9.26119	9.24998	9.30977	9.40767	9.17691	9.2192	9.27394	9.28031	9.3847	9.32915	9.36654	9.30289	9.32623	9.56451	9.55869	9.42915	9.48715	9.53609	8.88544	8.98713	9.05762	8.9245	8.87181	9.07837	9.18212	9.11642	9.01073	8.96372	8.90148	9.06646	9.30213	9.28868	9.27365	9.26792	9.31298	9.33286	9.48314	9.48413	8.97673	8.95823	9.10309	8.97722	629.004	-0.0240547
ENSMUSG00000002845	3.463	3.50694	3.5576	3.58565	3.52935	3.54177	3.44757	3.53504	3.56351	3.62728	3.5422	4.03028	4.01887	4.08843	4.11155	4.10582	4.15417	4.11305	4.06904	4.10974	4.01308	4.05533	4.09587	3.8484	3.80224	3.99969	3.9111	3.79586	3.89278	3.929	3.89231	3.85454	3.74562	3.8735	4.03458	3.50918	3.5575	3.50813	3.57766	4.04586	4.12385	4.09728	4.05476	3.88345	3.86658	3.89195	3.88457	11.6217	0.533845
ENSMUSG00000002846	6.4877	6.48505	6.58571	6.4089	6.54068	6.72592	6.59444	6.69851	6.71457	6.74828	6.66556	6.71536	6.92254	6.93232	6.97622	6.8666	6.9092	7.05105	6.82647	6.99314	6.83232	6.9365	6.95984	6.67616	6.76014	6.58248	6.57961	6.7233	6.72563	6.90367	6.63736	6.76385	6.64782	6.82058	6.9142	6.51949	6.47479	6.67296	6.70947	6.85674	6.91734	6.95689	6.90956	6.67293	6.67618	6.76829	6.7942	90.6852	-0.119819
ENSMUSG00000002870	4.36796	4.2507	4.336	4.28108	4.35223	4.29633	4.32161	4.35775	4.29679	4.31285	4.35615	4.01182	3.92873	4.16525	3.85239	4.04588	3.99622	4.00678	4.08926	4.17634	4.09535	4.11223	4.13503	3.24449	3.42371	3.32494	3.38168	3.41742	3.53732	3.34526	3.33066	3.30412	3.31362	3.41719	3.68737	4.31822	4.31665	4.32523	4.32193	4.03527	3.96483	4.09079	4.11421	3.33105	3.44547	3.32668	3.47273	19.8883	-0.0115021
ENSMUSG00000002871	5.94141	6.113	6.11357	5.86491	6.14403	6.11993	6.28643	6.09304	6.17817	6.2507	6.24246	6.28858	6.78326	6.60129	6.50597	6.51067	6.48174	6.49193	6.53445	6.6223	6.40591	6.74095	6.72051	5.84506	5.79367	5.75272	5.78862	5.75426	6.00783	6.32362	6.1965	6.3429	6.15636	6.23922	6.38431	6.05599	6.00447	6.16646	6.22377	6.55771	6.49946	6.54956	6.62245	5.79715	5.85023	6.28767	6.25996	66.065	-0.143576
ENSMUSG00000002881	6.88915	6.9395	7.06178	7.00752	7.05561	6.97063	6.91003	6.87218	6.97693	6.91222	6.74542	7.0587	7.01359	7.22491	7.10267	7.1445	6.92662	7.35276	7.2299	7.29556	7.1576	7.25886	7.23983	7.12747	7.09647	7.15907	7.11687	7.01831	7.13988	6.88974	6.94287	7.07697	7.07027	7.17409	7.20112	6.96348	7.03157	6.91761	6.87819	7.09907	7.05793	7.29274	7.21876	7.12767	7.09169	6.96986	7.14849	127.427	0.162344
ENSMUSG00000002885	7.84312	7.87104	7.91768	7.96983	8.01404	7.69057	7.78859	7.80014	7.85909	7.99595	7.88708	8.01626	8.47059	8.37214	8.2969	8.29345	8.43474	8.35832	8.21489	8.48389	8.20143	8.74522	8.54718	8.27808	8.19842	8.50705	8.26895	7.91941	8.4856	8.27589	8.62533	8.66305	8.92957	9.13778	8.92657	7.87728	7.99193	7.75977	7.91404	8.28633	8.34169	8.35237	8.49794	8.32785	8.22465	8.52142	8.99797	243.17	0.23474
ENSMUSG00000002897	7.16107	7.22284	7.41246	7.24839	7.41217	7.32489	7.21998	7.36452	7.13082	7.36607	7.46032	7.51679	7.79316	7.72619	7.58508	7.73051	7.73253	7.6137	7.58448	7.75997	7.48811	8.20537	7.8399	7.69217	7.54167	7.61635	7.81632	7.60797	7.76578	7.88929	8.14029	8.19286	8.29094	8.13401	8.19038	7.26546	7.33028	7.30313	7.31907	7.67871	7.68271	7.65272	7.84446	7.61673	7.73002	8.07415	8.20511	157.483	0.14528
ENSMUSG00000002900	5.2947	5.58898	5.17008	5.25292	5.20394	5.67381	5.50216	5.57732	5.53541	5.57345	5.29354	6.3481	6.09164	5.86493	6.4677	6.20044	6.48262	6.74007	6.91377	7.04617	7.14716	7.11142	6.8675	7.31653	7.01298	7.26414	7.28183	7.00996	6.94157	6.87729	7.46648	6.84782	6.41365	6.74312	6.8802	5.35125	5.22843	5.58443	5.46747	6.10156	6.38359	6.9	7.04203	7.19788	7.07779	7.06386	6.67899	41.215	-0.614973
ENSMUSG00000002908	4.18504	4.12829	4.23575	4.17041	4.23738	4.45885	4.44198	4.52371	4.54734	4.56112	4.50231	4.8439	4.91051	4.68635	4.86272	4.77972	4.6372	4.62799	4.8518	4.90664	4.78633	4.90665	4.81049	4.11821	4.14561	4.21875	4.07698	4.02906	4.05697	4.60743	4.65142	4.76806	4.58144	4.73703	4.73923	4.18303	4.2039	4.47485	4.53692	4.81358	4.75988	4.79548	4.83449	4.16085	4.05433	4.67564	4.6859	18.1705	0.16123
ENSMUSG00000002910	4.19021	4.20383	4.23821	4.11751	4.11422	4.01702	4.00759	4.0385	3.97275	3.98452	4.02059	4.2364	4.42413	4.25733	4.39004	4.17079	4.27772	4.01809	3.90469	3.92117	3.89813	3.80123	4.03866	2.73763	2.76013	2.77093	2.73633	2.6334	2.71308	3.40237	3.16608	3.24598	3.55055	3.3905	3.44182	4.21075	4.11586	4.02104	3.99262	4.30595	4.27951	3.94798	3.91267	2.75623	2.69427	3.27148	3.46096	18.2077	-0.795128
ENSMUSG00000002930	4.40205	4.34223	4.32238	4.33863	4.37893	4.44705	4.32557	4.30375	4.3315	4.33228	4.44959	4.53491	4.44796	4.47906	4.65469	4.54446	4.34882	4.51303	4.75147	4.57407	4.46735	4.51185	4.58627	4.02099	4.03555	4.02683	3.91553	3.99663	4.03057	3.52574	3.86983	3.90352	3.79839	3.68814	3.71095	4.35555	4.35878	4.35879	4.37112	4.48731	4.51599	4.61286	4.52182	4.02779	3.98091	3.76636	3.73249	20.4891	0.024739
ENSMUSG00000002944	4.20097	4.04875	4.12064	4.10343	4.03733	4.43929	4.4031	4.34513	4.31468	4.40797	4.40669	4.76883	5.01047	4.691	4.95211	4.89915	5.08819	4.98396	4.95198	5.26957	5.02045	5.47675	5.19207	5.30557	5.12559	5.1999	5.23669	4.95008	4.78811	5.044	5.29403	5.10571	4.82526	4.8578	5.16662	4.12345	4.07038	4.39584	4.37645	4.82343	4.97982	5.0685	5.22976	5.21036	4.99163	5.14792	4.94989	17.4484	-0.461947
ENSMUSG00000002948	NA	NA	NA	NA	NA	NA	NA	NA	NA	NA	NA	1.9919	2.06177	1.9958	2.01887	1.95338	1.97424	NA	NA	NA	NA	NA	NA	NA	NA	NA	NA	NA	NA	NA	NA	NA	NA	NA	NA	NA	NA	NA	NA	2.01649	1.98217	NA	NA	NA	NA	NA	NA	NA	NA
ENSMUSG00000002949	6.28896	6.32196	6.37542	6.39704	6.30761	6.42583	6.4853	6.64357	6.36229	6.51815	6.71651	6.61175	6.43067	6.59542	6.58472	6.54482	6.57815	6.95591	6.72901	6.60289	6.93003	6.35208	6.61343	5.92708	5.80658	6.03225	5.94984	6.09851	5.95327	6.34377	6.38013	6.0047	6.16057	6.10426	6.23869	6.32878	6.35233	6.51823	6.53232	6.54594	6.56923	6.7626	6.63184	5.92197	6.00054	6.24287	6.16784	81.1182	0.0659934
ENSMUSG00000002957	9.62757	9.53054	9.47661	9.49225	9.43009	9.69945	9.66948	9.68863	9.84681	9.575	9.5389	10.1387	9.86503	9.8318	9.90107	9.96849	9.90361	10.1296	10.161	9.96207	10.1594	10.0554	9.86154	9.94651	9.96966	9.81216	9.90954	10.0805	9.50427	9.98442	9.82508	9.87048	10.0052	9.80955	9.70528	9.54491	9.46117	9.68585	9.65357	9.94518	9.92439	10.0842	10.0255	9.90944	9.83143	9.89333	9.84002	731.898	-0.148841
ENSMUSG00000002963	5.98214	5.94058	6.05898	5.9655	6.13958	6.23038	6.3256	6.24176	6.2452	6.21498	6.43486	6.00064	6.18544	6.37129	5.96527	6.19817	6.02752	6.29237	6.22454	6.16105	6.27573	6.05954	6.30271	5.07008	5.03512	5.0591	4.93649	5.18081	5.44754	5.30808	5.47507	5.54185	5.33449	5.27276	5.28161	5.9939	6.05254	6.26591	6.29835	6.18579	6.06365	6.22599	6.21266	5.05477	5.18828	5.44167	5.29629	64.7788	0.207215
ENSMUSG00000002968	7.76369	7.99098	7.9767	7.78105	8.12647	7.78681	7.95515	7.83112	7.72039	7.9283	8.07326	7.95919	8.28375	8.16895	7.88285	8.03785	8.07682	8.15022	8.10773	8.24037	8.07968	8.20774	8.16256	7.40236	7.48323	7.33278	7.27863	7.47464	7.63561	7.6605	7.72173	8.01935	8.18939	8.17391	8.18389	7.91046	7.95376	7.85769	7.90732	8.1373	7.99917	8.16611	8.14999	7.40613	7.46296	7.80053	8.1824	246.034	0.110452
ENSMUSG00000002980	5.42165	5.48936	5.48743	5.55706	5.54651	5.48094	5.54518	5.55192	5.63873	5.82722	5.66509	6.05165	6.24308	6.10614	6.09497	5.91956	6.08559	6.00122	6.08817	6.38413	5.90391	6.42267	6.41658	6.12324	5.92788	5.9722	5.9461	5.96888	6.10838	6.26333	6.66559	6.28719	6.63535	6.70608	6.71133	5.46615	5.55179	5.52602	5.71035	6.13362	6.03337	6.15784	6.24772	6.00777	6.00779	6.40537	6.68425	45.3486	0.34495
ENSMUSG00000002981	10.7739	10.8551	10.9128	10.8585	11.0813	10.8654	10.908	10.8694	10.8462	11.0884	11.0252	11.0508	11.4593	11.2265	11.177	11.1824	11.3749	11.4637	11.4638	11.6707	11.4409	11.9145	11.6684	11.4638	11.3279	11.4584	11.4644	11.1462	11.3753	11.4156	11.7054	11.6354	11.2854	11.5117	11.4936	10.8473	10.9699	10.8809	10.9866	11.2455	11.2448	11.5327	11.6746	11.4167	11.3286	11.5855	11.4302	1916.59	0.20855
ENSMUSG00000002983	3.51281	3.5339	3.45153	3.50244	3.52323	3.6123	3.67107	3.68527	3.62532	3.80466	3.65776	3.35438	3.23902	3.29502	3.38137	3.21416	3.31691	3.37983	3.39836	3.3001	3.42248	3.25613	3.31721	3.14329	3.10321	3.0596	3.17595	3.26476	3.24748	3.08656	3.02073	3.06993	3.31082	3.19032	3.45955	3.49941	3.51283	3.65621	3.69591	3.29614	3.30415	3.35943	3.33194	3.10204	3.2294	3.05907	3.32023	11.3953	0.153061
ENSMUSG00000002984	6.95218	6.99789	7.11354	6.90189	7.15511	7.25976	7.60096	7.31078	7.24863	7.5372	7.57893	7.44837	7.72197	7.51824	7.53335	7.60922	7.55324	7.42055	7.56254	7.75495	7.49626	7.44308	7.52126	6.74688	6.75866	6.69848	6.61621	6.66472	6.7173	7.30571	7.17529	7.34574	7.15468	7.1374	7.26309	7.02121	7.0285	7.3905	7.45492	7.56286	7.56527	7.57935	7.48687	6.73467	6.66608	7.27558	7.18506	130.667	0.0364186
ENSMUSG00000002985	17.0117	17.1892	17.1314	17.0991	17.1284	17.0231	17.2437	17.0041	17.1117	17.3283	17.3153	17.0798	17.5704	17.4741	17.2228	17.2316	17.3755	17.2518	17.2696	17.513	17.0731	17.5983	17.5662	16.9455	17.0297	16.9737	16.9533	16.7544	17.2614	17.0175	17.18	17.3774	17.162	17.3112	17.5419	17.1108	17.1137	17.0903	17.2517	17.3748	17.2766	17.3448	17.4126	16.983	16.9897	17.1916	17.3384	141894	0.000798121
ENSMUSG00000002996	7.27334	7.11205	7.24865	7.24873	7.23836	7.30663	7.21546	7.19765	7.31022	7.20827	7.27645	7.31279	7.15403	7.3724	7.26609	7.22804	7.23929	7.46528	7.2756	7.42686	7.40283	7.03539	7.39727	6.75093	6.68045	6.83063	6.68096	6.61391	6.94643	6.68863	6.65584	6.88486	6.92836	6.71686	6.77537	7.21135	7.24354	7.23991	7.26498	7.27974	7.24447	7.38924	7.27849	6.75401	6.7471	6.74311	6.80686	149.811	0.068398
ENSMUSG00000002997	5.65761	5.57293	5.49624	5.57069	5.46553	6.11613	6.21357	6.08394	6.17617	5.98659	5.68047	6.47393	6.16449	5.81822	6.40371	6.37828	6.16681	6.96281	7.11013	7.02277	7.19902	6.83802	6.92863	6.66445	6.53645	6.5086	6.77558	6.61406	6.22885	6.76205	6.89201	6.20245	6.51718	6.54129	6.57326	5.57559	5.51811	6.13788	5.94774	6.15222	6.31627	7.0319	6.98856	6.56983	6.5395	6.61884	6.54391	47.4804	-0.241099
ENSMUSG00000003031	8.40622	8.46514	8.39794	8.50764	8.40741	8.32442	8.18684	8.21387	8.26605	8.26743	8.32768	8.42906	8.50188	8.59298	8.63483	8.42503	8.49068	8.72056	8.53962	8.61316	8.57781	8.53195	8.57576	7.81537	7.87565	7.925	7.8117	7.75749	8.05898	8.02259	7.93137	8.3103	7.90196	7.74995	7.66533	8.4231	8.45753	8.24171	8.28705	8.50797	8.51685	8.62445	8.56184	7.872	7.87606	8.08809	7.77241	347.1	0.0651872
ENSMUSG00000003032	NA	NA	NA	NA	NA	NA	NA	NA	NA	NA	NA	NA	NA	NA	NA	NA	NA	NA	NA	NA	NA	NA	NA	NA	NA	NA	NA	NA	NA	2.01803	2.03322	2.1318	2.35965	2.16252	2.13701	NA	NA	NA	NA	NA	NA	NA	NA	NA	NA	2.06102	2.21972	NA	NA
ENSMUSG00000003033	7.36978	7.42804	7.36994	7.41613	7.34632	7.41587	7.61518	7.60013	7.41755	7.49294	7.59912	7.64259	7.64881	7.55444	7.44866	7.78332	7.514	7.56409	7.72882	7.67019	7.62292	7.28262	7.69023	6.78176	6.85457	6.91954	6.76245	6.90838	7.0842	7.13275	7.08882	6.97539	7.07701	7.10629	7.45186	7.38925	7.38123	7.54373	7.5032	7.61528	7.58199	7.65437	7.53192	6.85196	6.91834	7.06565	7.21172	167.532	-0.0199292
ENSMUSG00000003037	7.60577	7.63525	7.48648	7.58032	7.51327	7.63217	7.62105	7.60965	7.7416	7.60028	7.65352	7.74778	7.76209	7.93192	7.63194	7.8792	7.84206	7.97708	7.88926	7.90625	7.90195	7.91441	8.06408	7.44285	7.39216	7.40135	7.37131	7.47738	7.63849	7.52859	7.56209	7.5946	7.66338	7.50835	7.63936	7.57583	7.54679	7.62096	7.66513	7.81393	7.7844	7.9242	7.96015	7.41212	7.49573	7.56176	7.6037	189.9	-0.0675996
ENSMUSG00000003038	3.13492	3.17813	3.23267	3.15595	3.23238	3.2641	3.35276	3.31674	3.33872	3.39791	3.4731	3.79096	3.94589	3.82058	3.99	3.85871	3.94168	3.38488	3.30281	3.32651	3.37941	3.47783	3.38953	2.29437	2.32016	2.34662	2.14721	2.23496	2.20543	3.26805	3.21947	3.37311	3.17715	3.33911	3.43718	3.18191	3.19417	3.3112	3.40324	3.85248	3.93013	3.33807	3.41559	2.32038	2.19587	3.28688	3.31781	9.00874	0.171836
ENSMUSG00000003039	6.73688	6.90562	6.654	6.8777	6.68149	6.78188	6.69084	6.66219	6.89275	6.773	6.86352	7.02203	6.98375	7.04204	6.96769	6.89967	6.98487	7.24462	7.21653	7.39939	7.45665	7.21218	7.2774	7.25079	7.15397	6.97548	7.19107	7.03162	7.053	7.17295	7.13035	7.31235	7.27666	7.34128	7.32035	6.7655	6.77959	6.71164	6.84309	7.01594	6.95074	7.28685	7.31541	7.12674	7.0919	7.20522	7.31276	110.648	0.031657
ENSMUSG00000003062	7.31572	7.29868	7.26336	7.2431	7.33307	7.16692	7.12055	7.14554	7.28426	7.18022	7.07928	7.57549	7.63977	7.45216	7.56305	7.55902	7.65189	7.52727	7.72795	7.73759	7.45989	7.90527	7.78003	7.67559	7.50935	7.49434	7.48504	7.39925	7.28957	7.81108	7.95841	7.90239	7.90238	8.14111	8.22788	7.29259	7.28809	7.14433	7.18125	7.55581	7.59132	7.66427	7.71506	7.55976	7.39129	7.89063	8.09046	156.609	-0.00468322
ENSMUSG00000003068	6.45617	6.49093	6.6603	6.42123	6.57436	6.51434	6.72628	6.57231	6.73273	6.88405	6.7409	6.8995	7.02581	6.88621	6.78031	6.8373	6.92731	6.79945	6.94053	7.06988	6.77677	7.05957	7.03136	6.39592	6.34011	6.33065	6.10388	6.19884	6.39457	6.45863	6.4217	6.72492	6.73422	6.71497	6.74459	6.5358	6.49779	6.60431	6.78589	6.93717	6.84831	6.93662	6.9559	6.35556	6.23243	6.53508	6.73126	92.146	-0.106551
ENSMUSG00000003070	4.39545	4.52008	4.54958	4.48371	4.67599	5.01242	4.9219	5.05134	4.97087	5.20638	5.15457	5.20049	5.43185	5.4589	5.32933	5.3374	5.50792	5.32975	5.58053	5.51258	5.46531	5.80475	5.78472	4.44547	4.48623	4.59891	4.63812	4.5198	4.69018	5.23182	5.42825	5.16549	4.70079	4.77796	4.87406	4.48837	4.57985	4.99522	5.11061	5.36375	5.39155	5.47429	5.68492	4.5102	4.61603	5.27519	4.78427	23.0474	0.593411
ENSMUSG00000003072	10.085	10.1099	10.3498	10.0157	10.1978	10.0234	10.3631	10.2347	10.1654	10.3507	10.3766	10.1261	10.3622	10.4	10.085	10.2311	10.2015	10.2464	10.4847	10.3652	10.2073	10.2803	10.553	9.29375	9.40089	9.42386	9.37244	9.40967	9.45642	9.72362	9.74942	9.7911	9.60967	9.45103	9.8249	10.1816	10.1067	10.2071	10.2976	10.2961	10.1725	10.3654	10.3468	9.37283	9.41284	9.75471	9.62853	1145.62	-0.130116
ENSMUSG00000003099	8.76573	8.7898	8.78448	8.72568	8.74663	8.9063	8.94203	8.89016	8.92286	9.14946	9.14321	9.17586	9.40839	9.25244	9.15615	9.19601	9.32532	9.29166	9.25749	9.30557	9.33819	9.3245	9.31073	8.81542	8.80711	8.66725	8.81057	8.76538	8.76119	9.13561	8.89705	9.10429	8.71452	8.74313	8.78126	8.78	8.73616	8.91283	9.07184	9.2789	9.22583	9.28491	9.32447	8.76326	8.77904	9.04565	8.7463	434.43	-0.0804702
ENSMUSG00000003119	6.48074	6.46942	6.5384	6.55674	6.64787	6.64183	6.66171	6.84809	6.71456	6.57479	6.78493	7.06016	6.91278	7.08209	7.03687	7.03309	6.82312	7.38825	7.13417	7.10195	7.36657	7.01004	6.98249	6.61674	6.53647	6.71422	6.6875	6.68697	6.67884	6.93881	6.94703	6.90459	6.59121	6.52903	6.30672	6.49619	6.6023	6.71721	6.69143	7.01834	6.96436	7.20812	7.1197	6.62248	6.68444	6.93014	6.47565	93.0531	0.299593
ENSMUSG00000003123	5.75588	5.75847	5.84492	5.69539	5.83489	5.75998	5.99381	5.70019	5.82238	5.80685	6.08862	5.72408	5.77127	5.83836	5.70361	5.85333	5.83138	5.72459	5.62821	5.65572	5.5576	5.53213	5.66108	5.07697	5.0284	4.95332	5.0291	5.10601	5.14939	5.04588	4.86185	5.0561	4.82311	4.77301	4.87573	5.78642	5.76514	5.81799	5.90595	5.7779	5.79611	5.66951	5.5836	5.01956	5.09483	4.98794	4.82395	54.8263	-0.0665883
ENSMUSG00000003131	8.90666	8.88806	8.82599	8.80699	8.80449	9.00941	8.91734	8.98105	8.90824	9.03543	8.91098	9.35324	9.20356	9.10029	9.32945	9.27255	9.21067	9.38981	9.45435	9.36217	9.48099	9.32674	9.31705	9.12764	9.10187	9.13477	9.12714	9.1265	9.02402	9.30977	9.32617	9.11924	9.33929	9.37305	9.35177	8.87357	8.80574	8.96927	8.95155	9.21903	9.27089	9.40211	9.37493	9.12143	9.09255	9.25173	9.3547	460.914	-0.125095
ENSMUSG00000003134	3.66265	3.71897	3.63162	3.56517	3.64097	4.31355	4.31332	4.29709	4.20259	4.38856	4.25921	4.68553	4.54627	4.52974	4.5256	4.6422	4.5683	4.39681	4.59676	4.48855	4.47332	4.47654	4.28698	4.59475	4.34555	4.46091	4.51517	4.51487	4.67992	4.41724	4.45884	4.26681	4.34821	4.35358	4.30022	3.67108	3.60307	4.30799	4.28346	4.58718	4.5787	4.49404	4.41228	4.46707	4.56999	4.38097	4.334	12.6029	-0.748804
ENSMUSG00000003135	7.43425	7.4432	7.46279	7.34798	7.3767	7.57791	7.54097	7.60389	7.47644	7.31461	7.57827	7.74065	7.54138	7.6544	7.64157	7.69029	7.64815	7.80893	7.69299	7.70214	7.80029	7.52041	7.6503	6.97041	6.91254	7.0766	6.99642	7.0752	6.84058	7.26905	7.18441	7.25791	7.28367	7.17223	6.97615	7.44675	7.36234	7.57425	7.45644	7.64548	7.66001	7.73469	7.657	6.98652	6.97074	7.23712	7.14402	170.672	-0.189963
ENSMUSG00000003153	7.31379	7.33997	6.96732	7.02629	7.20888	7.72317	7.79122	7.77912	7.66302	7.84166	7.32077	8.17235	8.19037	7.62896	8.07046	8.32708	8.29088	8.51009	8.9269	8.99311	8.87514	9.12318	8.92425	8.85625	8.53904	8.64619	8.93812	8.50545	7.97796	9.18817	9.46593	8.95266	8.74359	9.02171	8.83429	7.20703	7.11758	7.7645	7.60848	7.99723	8.22947	8.81004	8.97419	8.68049	8.47384	9.20225	8.86653	146.679	-0.229591
ENSMUSG00000003154	6.43707	6.48444	6.53209	6.55782	6.59192	6.51839	6.63348	6.62953	6.42344	6.58418	6.65828	6.75843	6.7717	6.72103	6.73781	6.61797	6.68233	6.69827	6.90957	6.72716	6.71241	6.55597	6.59529	5.9588	6.06732	6.03209	6.06746	6.14327	6.17912	6.37416	6.04574	6.37707	6.1625	6.18905	6.11042	6.48453	6.57487	6.5938	6.5553	6.75039	6.67937	6.77833	6.62122	6.0194	6.12995	6.26566	6.15399	91.9058	0.25255
ENSMUSG00000003161	8.99186	8.93986	9.13016	9.05962	9.17269	9.00576	9.04792	9.06869	9.01827	9.10848	9.15011	9.159	9.35106	9.35146	9.08849	9.2847	9.23304	9.19071	9.19438	9.14871	9.05332	9.17889	9.27629	8.66275	8.67084	8.76508	8.61064	8.79083	8.9195	8.94174	8.91232	9.05012	9.08686	9.02974	9.17234	9.02063	9.11616	9.04079	9.09229	9.28718	9.20208	9.17793	9.1695	8.69956	8.77366	8.96806	9.09632	535.251	0.168799
ENSMUSG00000003166	NA	NA	NA	NA	NA	NA	NA	NA	NA	NA	NA	2.25174	2.27669	2.23521	2.33378	2.31696	2.23201	NA	NA	NA	NA	NA	NA	1.87832	1.7772	1.83186	1.75276	1.70673	1.75531	NA	NA	NA	NA	NA	NA	NA	NA	NA	NA	2.25455	2.29425	NA	NA	1.82912	1.73826	NA	NA	NA	NA
ENSMUSG00000003184	6.57212	6.56928	6.82265	6.59035	6.70043	6.57063	6.71956	6.74826	6.66158	6.64293	6.76053	6.76589	6.85631	6.79572	6.78384	6.77587	6.58923	6.89192	6.90227	6.77594	6.73819	6.65927	6.9037	5.79267	5.81907	5.66512	5.74698	5.78026	5.97544	6.16662	6.13428	6.34897	5.88548	5.86195	6.06381	6.65469	6.64539	6.67948	6.68835	6.80598	6.71631	6.85671	6.76706	5.75896	5.83422	6.21662	5.93708	101.067	-0.0388803
ENSMUSG00000003190	3.48809	3.46039	3.45938	3.4902	3.49116	3.71004	3.95715	3.7929	3.83165	3.81102	3.84421	3.79367	3.87167	3.77768	3.78547	3.73164	3.74375	3.78945	3.61323	3.63169	3.74048	3.59901	3.86263	2.80451	2.86745	2.81145	2.84376	2.78447	2.83988	2.92846	2.85097	2.72994	2.81048	2.88435	2.72934	3.46929	3.49068	3.82003	3.82896	3.81434	3.75362	3.67813	3.73404	2.8278	2.82271	2.83645	2.80806	11.1354	0.24958
ENSMUSG00000003198	3.62446	3.7053	3.57258	3.68896	3.54389	3.25993	3.24707	3.32348	3.28729	3.31096	3.24676	3.50709	3.49324	3.60919	3.47798	3.53683	3.47838	3.91499	4.0447	3.99391	3.92162	4.01982	3.86382	3.87065	3.77211	3.85222	3.81645	3.94	3.76709	3.49683	3.41052	3.52099	3.30046	3.40442	3.38349	3.63411	3.61642	3.27683	3.28167	3.53651	3.49773	3.98453	3.93509	3.83166	3.84118	3.47611	3.36279	12.8325	-0.180948
ENSMUSG00000003199	6.90496	7.14867	7.09073	6.92697	7.05854	6.81792	7.10259	6.90861	6.99544	7.21426	7.19413	7.06054	7.32678	7.17691	7.05528	7.05461	7.12319	7.00759	7.21891	7.19189	7.05697	7.19903	7.28167	6.10531	6.25328	6.14466	6.26478	6.38697	6.44206	6.69846	6.78185	6.93718	6.92232	6.98577	7.05416	7.04812	6.99275	6.94304	7.13461	7.18808	7.0777	7.13946	7.17922	6.16775	6.3646	6.80583	6.98742	131.123	-0.139133
ENSMUSG00000003200	6.74778	6.73022	6.74214	6.66006	6.71034	6.72006	6.79154	6.76562	6.7845	6.8277	6.87686	6.83437	7.06413	7.04525	6.98272	6.96075	6.998	7.04149	6.88322	6.86071	6.89435	6.82929	6.93535	5.98464	6.23857	6.11387	6.10625	6.27381	6.36599	6.70318	6.33105	6.52962	6.57864	6.44184	6.60152	6.74005	6.6852	6.75908	6.82969	6.98125	6.98049	6.92847	6.88633	6.11236	6.24868	6.52128	6.54067	105.338	-0.143567
ENSMUSG00000003208	5.2394	5.15184	5.16731	5.18376	5.14035	5.26417	5.39396	5.34656	5.39884	5.44582	5.50269	5.52452	5.58486	5.68405	5.55598	5.59663	5.53011	5.91601	5.49573	5.70648	5.80306	5.67821	5.75339	4.81537	5.03734	4.84742	4.9494	4.96026	4.82891	5.13582	5.03989	5.12935	4.87342	4.94762	5.22931	5.18619	5.16205	5.3349	5.44912	5.59781	5.56091	5.70607	5.74489	4.90004	4.91286	5.10169	5.01678	36.3195	-0.120369
ENSMUSG00000003226	8.89362	8.71967	8.70972	8.96654	8.73813	9.08275	8.88869	9.06563	8.95755	8.69483	8.72178	9.15896	8.83867	9.02282	9.2025	9.07974	9.05249	9.85418	9.48813	9.42933	9.97277	9.37083	9.43532	9.34273	9.32255	9.41624	9.51297	9.29201	9.27004	9.36222	9.30156	9.2864	9.00039	8.90943	8.8769	8.77434	8.85233	9.01236	8.79139	9.00682	9.11158	9.59054	9.59297	9.36051	9.35834	9.31673	8.9289	450.746	0.144908
ENSMUSG00000003228	3.02358	3.00805	2.95153	2.92049	2.92238	3.59209	3.53097	3.40833	3.54285	3.49099	3.42608	4.17505	3.93355	3.79366	4.07353	3.89642	3.90349	3.81752	3.73768	3.72713	3.92777	3.68754	3.83135	3.9998	3.91818	3.90346	3.8635	3.83059	3.73494	3.73372	3.93121	3.81234	3.90476	3.75115	3.64328	2.99439	2.92143	3.51046	3.48664	3.96742	3.95782	3.76078	3.81556	3.94048	3.80968	3.82576	3.7664	7.98224	-1.33074
ENSMUSG00000003233	7.46171	7.66148	7.79203	7.63284	7.90532	7.67448	7.94088	7.83287	7.68506	8.0314	8.08601	7.91523	8.15	7.96872	7.76983	7.96506	7.88328	7.87226	7.94471	7.94257	7.81353	7.82917	8.05276	6.80988	7.11761	6.99376	6.90915	6.95164	7.52779	7.49833	7.29391	7.4175	7.54553	7.43277	7.5187	7.63841	7.76908	7.81608	7.93415	8.01132	7.87272	7.91984	7.89849	6.97375	7.12953	7.40325	7.499	209.238	0.277951
ENSMUSG00000003234	7.37231	7.39993	7.54496	7.33826	7.40995	7.56655	7.81135	7.67998	7.66665	7.6165	7.70428	7.72671	7.57422	7.75023	7.66394	7.68625	7.57227	7.82335	7.65505	7.64741	7.88413	7.44068	7.61219	6.84105	6.97958	6.76302	6.92707	6.87079	7.08934	7.05889	7.19919	6.99884	6.80701	6.85372	6.85638	7.43907	7.3741	7.68596	7.66247	7.68372	7.64082	7.7086	7.64567	6.86122	6.9624	7.08564	6.83904	170.925	-0.150303
ENSMUSG00000003235	7.23126	7.20913	7.27791	7.23977	7.25387	7.28034	7.35977	7.31204	7.33546	7.44433	7.44526	7.41479	7.47764	7.33288	7.32388	7.46602	7.32025	7.46536	7.49758	7.54818	7.39537	7.3489	7.36806	6.82938	6.8672	6.96312	6.73301	6.93406	7.07404	6.99936	7.11941	7.02139	7.14133	7.08338	7.31393	7.23944	7.24682	7.31738	7.40835	7.40844	7.37005	7.50371	7.37078	6.88657	6.9137	7.04672	7.17955	151.41	0.0161763
ENSMUSG00000003269	7.70072	7.683	7.57611	7.52589	7.46396	7.95005	7.8114	7.7472	7.86587	7.90161	7.82492	8.21618	8.0698	7.99284	8.18491	8.04243	8.04756	8.46421	8.58423	8.40177	8.66608	8.42374	8.37761	8.39376	8.21623	8.24237	8.35659	8.6189	8.4991	8.37554	8.34875	8.17337	8.53467	8.58581	8.58226	7.65328	7.49492	7.83622	7.86413	8.09294	8.09163	8.4834	8.48914	8.28412	8.49153	8.29922	8.56758	194.089	-0.350623
ENSMUSG00000003271	2.14273	2.21119	2.2169	2.13276	2.14368	3.05004	3.14119	3.03258	3.0755	3.0314	2.95543	3.50467	3.32934	3.2141	3.29076	3.28754	3.22656	3.78352	3.97287	3.73787	3.84829	3.87349	3.98845	3.75569	3.79599	3.76668	3.88173	3.83621	3.65534	4.09949	4.11623	4.07581	4.42209	4.3092	4.14647	2.19027	2.13822	3.0746	3.02078	3.34937	3.26829	3.83142	3.90341	3.77279	3.79109	4.09718	4.29259	4.56752	-1.65619
ENSMUSG00000003273	6.53876	6.53919	6.47992	6.39706	6.57594	6.70148	6.78684	6.73909	6.75149	6.93377	6.60182	7.20407	7.29048	6.89234	7.13565	7.15098	7.14166	7.15939	7.52294	7.47329	7.47777	7.67079	7.5056	7.42198	7.23629	7.13407	7.30642	7.17959	6.85324	7.16682	7.60827	7.15983	7.04759	7.17516	7.40679	6.51929	6.4865	6.74247	6.76236	7.12896	7.14276	7.38521	7.55139	7.26411	7.11308	7.31164	7.20985	91.0253	-0.0749139
ENSMUSG00000003279	9.36474	9.53109	9.24083	9.4317	9.24985	9.51776	9.4915	9.4413	9.42901	9.54675	9.32599	9.92256	9.73298	9.58097	9.75999	9.75667	9.81787	9.77013	10.0404	10.0378	10.0295	10.024	10.0238	9.76996	9.77777	9.95749	9.79443	9.75825	9.75293	9.95826	9.95173	9.71278	9.95538	9.94798	9.71756	9.37889	9.34077	9.48352	9.43391	9.7455	9.77818	9.94942	10.0258	9.83508	9.76853	9.87426	9.87364	663.899	-0.0728041
ENSMUSG00000003299	6.93552	7.09393	7.09177	6.84595	7.10313	6.96477	7.19642	7.14586	7.07017	7.29419	7.33905	6.95806	7.24811	7.23431	6.90739	7.17426	7.09672	7.00181	7.29279	7.32118	7.03192	7.22507	7.28282	6.15533	6.18369	6.11091	6.13464	6.1548	6.11643	6.61666	6.66857	6.72437	6.60849	6.50928	6.93291	7.04041	6.97454	7.10235	7.23447	7.14683	7.05946	7.20526	7.17993	6.14998	6.13529	6.66986	6.68356	130.033	-0.14254
ENSMUSG00000003308	6.75261	6.81965	6.93796	6.91218	7.02221	6.84257	6.94872	6.92678	6.85157	6.99671	7.03077	7.06224	6.99701	6.98759	6.86435	7.01164	6.98966	6.94498	7.08794	7.06247	6.89582	6.96552	7.11773	6.24533	6.33645	6.28479	6.16733	6.32679	6.36405	6.90607	6.77903	6.48542	6.76811	6.87067	6.91656	6.83674	6.96719	6.90603	6.95968	7.01562	6.95521	7.03179	6.99302	6.28886	6.28606	6.72351	6.85178	119.03	0.326563
ENSMUSG00000003316	11.1051	11.1017	10.9292	11.1223	11.0583	11.2066	11.1823	11.1584	11.1836	11.2537	11.1039	11.4756	11.7142	11.4049	11.5966	11.5527	11.6756	11.9487	11.8094	12.0048	12.0403	12.2139	11.9888	12.278	12.0585	12.2349	12.278	11.7929	12.0082	11.9865	12.242	12.0393	11.8552	12.0108	11.9767	11.0453	11.0903	11.1824	11.1804	11.5316	11.6083	11.9209	12.081	12.1905	12.0263	12.0893	11.9476	2145.58	0.0690535
ENSMUSG00000003344	6.98548	7.1277	7.25881	6.84325	7.0969	6.98351	7.23251	7.0857	7.04945	7.12398	7.24289	7.18954	7.36807	7.31569	7.11438	7.36993	7.21315	7.06959	7.22789	7.38453	7.12633	7.30901	7.18773	6.36018	6.43667	6.27931	6.27906	6.33641	6.34008	6.85135	6.87242	6.80357	6.75561	6.90599	6.86283	7.124	6.97007	7.10057	7.13877	7.2911	7.23249	7.22734	7.20769	6.35872	6.31852	6.84245	6.84148	135.383	-0.366848
ENSMUSG00000003345	5.42516	5.50107	5.50445	5.34922	5.40236	5.424	5.66283	5.55557	5.57471	5.82532	5.64902	5.97237	5.70121	5.81897	5.68454	5.81301	5.70116	5.65587	5.95261	5.77888	5.83054	5.91603	5.77129	5.6554	5.61572	5.47914	5.52898	5.58429	5.75314	5.78892	5.76149	5.56	5.88249	5.74478	6.0361	5.47689	5.37579	5.54746	5.68302	5.83085	5.73291	5.79579	5.83929	5.58342	5.62214	5.70347	5.88779	43.5106	-0.432146
ENSMUSG00000003346	5.63472	5.66985	5.58784	5.535	5.64539	5.68057	5.76336	5.6581	5.62962	5.89616	5.84298	5.74342	6.08035	5.95663	5.76577	5.94947	5.88311	5.86332	6.07483	6.05099	5.92827	6.13222	6.08699	5.24773	5.16298	5.35727	5.23994	5.11673	5.43319	5.80168	5.9342	5.93521	5.95883	5.96972	5.8428	5.6308	5.59019	5.70068	5.78958	5.9268	5.86612	5.99638	6.04916	5.256	5.26329	5.89036	5.92378	49.0569	-0.147643
ENSMUSG00000003348	5.40188	5.46046	5.5005	5.53769	5.58943	5.02116	5.11389	5.12074	5.02229	5.02629	5.17389	5.45651	5.61115	5.65169	5.60791	5.60009	5.48449	5.39658	5.47594	5.38765	5.45534	5.31297	5.46174	4.84628	4.7098	4.87837	4.64587	4.77689	4.80523	4.96727	5.09011	5.15636	5.17197	4.91647	5.15171	5.45428	5.56356	5.08526	5.07416	5.57312	5.56416	5.42006	5.41002	4.81148	4.74266	5.07124	5.08005	45.2438	0.442794
ENSMUSG00000003352	5.68329	5.66852	5.46731	5.48699	5.27	6.06119	6.05478	6.05344	5.92502	6.07944	5.78994	6.66497	6.299	5.99144	6.44235	6.47231	6.2941	6.78871	7.00137	6.92315	6.99729	6.887	6.68007	6.80353	6.67861	6.60289	6.66725	6.56577	6.13762	7.08205	7.00718	6.67856	6.74777	6.85162	6.69438	5.60637	5.37849	6.05647	5.93147	6.31847	6.40292	6.90441	6.85479	6.69501	6.45688	6.92259	6.76459	47.7363	-0.969823
ENSMUSG00000003354	4.16262	4.14458	4.09412	4.07016	4.0559	4.46105	4.54669	4.51859	4.58096	4.42048	4.52486	4.49236	4.40417	4.35437	4.49314	4.65762	4.40451	4.92655	4.85297	4.87445	4.94668	4.83661	4.78878	4.39659	4.25577	4.16203	4.21783	4.21757	4.2625	3.95948	3.79405	3.94216	3.81124	3.72389	3.77376	4.13378	4.06303	4.50878	4.50877	4.41697	4.51842	4.88466	4.85736	4.27146	4.23263	3.89856	3.76963	17.4089	-0.606995
ENSMUSG00000003355	4.96331	5.03113	4.95969	5.02416	4.91615	4.20471	4.18128	4.20401	4.25149	4.27828	4.25929	4.18517	4.24473	4.30548	4.27231	4.31863	4.17578	4.37223	4.31138	4.5085	4.26074	4.61241	4.32205	4.31199	4.37306	4.22112	4.23677	4.2365	4.28272	4.14188	4.0928	4.05126	4.01954	4.11727	4.09276	4.98471	4.97015	4.19667	4.26302	4.24513	4.25557	4.39737	4.3984	4.30206	4.252	4.09531	4.07652	31.8463	-0.0780193
ENSMUSG00000003360	8.29971	8.28319	8.36774	8.22983	8.26904	8.36841	8.49958	8.332	8.4196	8.54064	8.48883	8.41225	8.41989	8.57841	8.41811	8.50838	8.43912	8.6579	8.54437	8.48368	8.66086	8.42603	8.57108	7.76686	7.83211	7.87753	7.7976	7.79975	7.95444	8.11082	7.79848	7.89822	7.74358	7.68773	7.68776	8.31688	8.24944	8.4	8.48302	8.47018	8.4552	8.56199	8.55266	7.8255	7.8506	7.93584	7.70636	313.336	-0.13205
ENSMUSG00000003363	10.4625	10.4743	10.3318	10.24	10.3512	10.6015	11.0143	10.8683	10.7527	11.137	10.581	11.379	11.5197	10.8037	11.1651	11.4234	11.4346	11.4915	11.9478	11.9868	11.8057	12.2262	11.9092	11.8294	11.6028	11.5705	11.8243	11.4554	11.0398	11.9379	12.2506	11.7271	11.5465	11.906	11.8588	10.4229	10.2956	10.828	10.8236	11.2342	11.341	11.8087	11.9804	11.6676	11.4398	11.9719	11.7704	1330.71	-0.212271
ENSMUSG00000003378	6.66511	6.73216	6.75427	6.54334	6.72765	6.55094	6.79872	6.70177	6.58717	6.74454	6.66031	7.01209	7.27341	6.92073	6.82662	7.04158	7.0248	6.97572	7.21959	7.29241	7.05749	7.53872	7.16905	6.95947	6.85616	6.94352	6.85349	6.73017	6.42583	7.33288	7.37469	7.31184	7.19564	7.34124	7.21713	6.71718	6.63549	6.68381	6.66401	7.06874	6.96433	7.16257	7.25508	6.91972	6.66983	7.3398	7.25134	103.148	-0.204173
ENSMUSG00000003380	9.4855	9.68873	9.73878	9.51192	9.72486	9.4535	9.51141	9.49184	9.44437	9.64297	9.6793	9.67051	9.98743	9.853	9.70514	9.69398	9.84565	9.79782	9.95682	10.0564	9.79512	10.2218	10.1095	9.12091	9.1405	9.18354	9.08534	9.10989	9.2755	9.53328	9.54409	9.72777	9.59905	9.65226	9.84802	9.63767	9.61839	9.48558	9.58888	9.83698	9.74826	9.937	10.0421	9.14832	9.15691	9.60172	9.69978	797.221	-0.0320654
ENSMUSG00000003382	4.38118	4.48127	4.47035	4.40109	4.47764	4.53303	4.5774	4.55995	4.64053	4.46459	4.71376	4.76785	4.79324	4.9226	4.76034	4.83173	4.72258	4.82607	4.68622	4.58033	4.83409	4.58435	4.62571	4.17315	4.09024	4.15272	4.0346	4.03437	4.20691	4.47837	4.36164	4.31468	4.30202	4.09724	4.58264	4.44426	4.43937	4.55679	4.60629	4.8279	4.77155	4.69754	4.68138	4.1387	4.09196	4.3849	4.3273	21.7132	-0.0295886
ENSMUSG00000003402	9.89702	10.0531	10.111	10.0198	10.1789	10.0055	10.2611	10.1416	10.1268	10.365	10.3071	10.1894	10.7699	10.4233	10.4191	10.4465	10.5867	10.5525	10.6257	10.8283	10.5964	11.0265	10.9404	10.4203	10.3474	10.3923	10.3934	10.0513	10.4846	10.4448	10.7914	10.7176	10.1849	10.4783	10.6569	10.0203	10.0993	10.1361	10.2663	10.4609	10.4841	10.6688	10.8544	10.3867	10.3098	10.6513	10.44	1066.38	0.1326
ENSMUSG00000003410	6.3933	6.33985	6.2014	6.048	6.05151	6.48181	6.58509	6.42668	6.54135	6.44834	6.20488	6.93641	6.70133	6.50855	6.87632	6.80553	6.80204	7.23501	7.36545	7.32269	7.4398	7.23617	7.2358	6.577	6.60368	6.56535	6.56043	6.66449	6.23266	7.14077	7.19583	7.00204	6.84195	6.93689	6.83809	6.31152	6.04975	6.49786	6.39819	6.71543	6.82796	7.30771	7.30392	6.58201	6.48586	7.11288	6.87231	75.7133	-0.852621
ENSMUSG00000003411	5.80071	5.72016	5.53727	5.618	5.517	6.18195	6.54664	6.2517	6.29842	6.1188	5.98568	6.37638	6.14957	5.95192	6.34483	6.40148	6.21565	6.49945	6.76072	6.80979	6.70548	6.59958	6.68352	6.22858	6.14866	6.15657	6.15469	6.19431	5.96667	6.61416	6.47217	6.19264	6.78164	6.54114	6.73697	5.68605	5.5675	6.32676	6.1343	6.15929	6.32065	6.68999	6.66286	6.17794	6.10522	6.42632	6.68658	50.9493	-0.489729
ENSMUSG00000003418	NA	NA	NA	NA	NA	2.3296	2.43385	2.39444	2.39131	2.41184	2.32803	NA	NA	NA	NA	NA	NA	3.19938	3.26382	3.26711	3.13524	3.27449	3.09959	3.74436	3.54448	3.55466	3.62377	3.52081	3.47776	3.51722	3.63037	3.42104	3.56778	3.58795	3.55815	NA	NA	2.38596	2.37706	NA	NA	3.24344	3.16977	3.6145	3.54078	3.52288	3.57129	NA	NA
ENSMUSG00000003420	8.50498	8.59485	8.85904	8.53889	8.8683	8.36575	8.4096	8.43746	8.54876	8.72316	8.57795	8.57616	8.83901	8.87507	8.81978	8.68792	8.85122	8.80535	8.73111	8.85365	8.69181	9.02622	8.90887	8.47748	8.50907	8.48179	8.52422	8.22954	8.57031	8.29586	8.65563	8.73571	7.99472	8.30217	8.41754	8.65295	8.7036	8.40427	8.61662	8.76342	8.78631	8.7967	8.87563	8.48945	8.44136	8.5624	8.23814	413.847	0.0984952
ENSMUSG00000003421	7.02286	7.17429	7.23062	7.09331	7.14571	7.08486	7.25333	7.11202	7.18628	7.21889	7.3149	7.31624	7.22712	7.22252	7.30003	7.17614	7.10314	7.48671	7.28087	7.57816	7.40142	7.25436	7.59546	6.39349	6.52468	6.53774	6.59912	6.50279	6.83545	6.71926	6.85408	6.61706	6.55547	6.58958	6.60162	7.14259	7.11951	7.15007	7.24002	7.25529	7.19311	7.44858	7.41708	6.4853	6.64579	6.73013	6.58222	140.834	-0.0620816
ENSMUSG00000003423	6.66888	6.64864	6.71507	6.59465	6.55753	6.43118	6.76047	6.58624	6.58636	6.66612	6.75156	6.77363	6.77347	6.82119	6.54991	6.75257	6.84125	6.78658	6.89219	6.71155	6.79882	6.74661	6.92252	6.11855	6.14675	6.1185	6.20117	6.25262	6.29035	6.41155	6.20454	6.34855	6.55844	6.3949	6.57162	6.67753	6.57609	6.59263	6.66801	6.78943	6.71458	6.79677	6.82265	6.12793	6.24805	6.32155	6.50832	99.8949	-0.283198
ENSMUSG00000003429	8.11674	8.12605	8.23978	8.1089	8.25191	8.19676	7.95109	8.47336	8.08311	8.14879	8.31958	8.51189	8.69818	8.99594	8.58607	8.7057	8.84736	8.85312	8.65858	8.51156	8.61328	8.66343	8.49436	8.30071	8.25796	8.14428	8.13982	8.42836	8.18061	8.75371	8.75948	8.78794	8.50891	8.40941	8.5459	8.16085	8.1804	8.20707	8.18382	8.73534	8.71304	8.67442	8.59036	8.23432	8.24959	8.76704	8.48807	288.202	0.0429626
ENSMUSG00000003435	7.84857	7.78093	7.95403	7.9008	7.83096	8.01528	8.39867	8.18133	8.09473	8.11815	8.06611	8.22571	8.1303	8.0635	8.1734	8.16532	8.05095	8.50089	8.49925	8.50258	8.7013	8.09574	8.53889	7.48794	7.54805	7.62809	7.6838	7.44548	7.62762	7.82594	7.94393	7.64941	7.65549	7.72593	7.8812	7.86118	7.86588	8.19843	8.093	8.13984	8.12989	8.50091	8.44531	7.55469	7.58563	7.80643	7.75421	233.379	0.00260112
ENSMUSG00000003436	NA	NA	NA	NA	NA	NA	NA	NA	NA	NA	NA	NA	NA	NA	NA	NA	NA	1.82873	1.76713	1.84029	1.72118	1.91356	1.89679	NA	NA	NA	NA	NA	NA	2.32371	2.4556	2.44075	2.52762	2.77468	2.64896	NA	NA	NA	NA	NA	NA	1.81205	1.84384	NA	NA	2.40669	2.65042	NA	NA
ENSMUSG00000003437	7.77701	7.75781	7.80356	7.8017	7.7828	8.04674	8.08115	8.11904	8.07006	7.9281	8.04389	8.16141	7.99812	8.02801	8.13582	8.16385	8.02832	8.41935	8.24519	8.28571	8.46706	7.98675	8.2615	7.18637	7.31516	7.54423	7.52758	7.30527	7.59042	7.58075	7.73665	7.61562	7.77404	7.52397	7.67701	7.77946	7.79225	8.08231	8.01402	8.06252	8.10933	8.31675	8.23843	7.34859	7.47442	7.64434	7.65834	220.524	0.0254931
ENSMUSG00000003438	6.89476	6.95099	6.91407	7.00221	6.9282	7.11061	7.06166	7.01163	7.01093	6.83935	7.06533	6.90792	6.98955	7.0858	7.00817	7.02068	6.88526	7.23913	7.28987	7.2625	7.21096	7.2457	7.23036	6.47975	6.60838	6.63962	6.60347	6.56421	6.73049	6.68173	6.58204	6.65798	6.76996	6.55519	6.74961	6.91994	6.96521	7.0613	6.97187	6.99442	6.97137	7.26383	7.22901	6.57592	6.63272	6.64058	6.69159	122.85	0.111613
ENSMUSG00000003444	4.52754	4.57444	4.55493	4.59482	4.56576	4.37859	4.47937	4.19814	4.45316	4.42673	4.41107	4.38645	4.58414	4.40487	4.48001	4.51712	4.48606	4.42905	4.36822	4.27495	4.33033	4.50634	4.54973	3.74625	3.79869	3.78186	3.74398	3.71098	3.57296	4.30844	4.53357	4.6497	4.27982	4.35534	4.67214	4.55231	4.58029	4.35204	4.43032	4.45849	4.49439	4.35741	4.46213	3.7756	3.67597	4.49723	4.43577	23.6973	0.175392
ENSMUSG00000003452	7.67195	7.58677	7.62534	7.61052	7.63917	7.78571	7.76472	7.69438	7.81542	7.69018	7.70606	7.93753	7.78051	7.88596	7.9842	7.94516	7.93236	8.39235	8.17049	8.05453	8.31818	7.97968	8.07922	7.95619	8.10572	8.08568	8.04621	8.06615	7.87417	7.84886	7.78868	7.81822	7.98123	8.02822	7.69049	7.62802	7.62485	7.74827	7.73722	7.868	7.95391	8.20579	8.12569	8.0492	7.99551	7.81859	7.89998	197.702	-0.00706458
ENSMUSG00000003458	8.99202	9.01004	8.99395	9.03692	9.04935	9.00805	8.91687	8.96571	8.9563	9.07671	8.99605	9.26149	9.54756	9.29395	9.40856	9.37472	9.57874	9.49733	9.5704	9.77179	9.55288	10.0288	9.7112	9.84004	9.67512	9.74907	9.83763	9.47496	9.73241	9.83118	9.95555	9.86221	9.7719	9.99776	9.92973	8.99867	9.04313	8.96354	9.00969	9.36767	9.45401	9.61318	9.7643	9.75474	9.68166	9.88298	9.89979	517.989	0.0803355
ENSMUSG00000003464	8.73836	8.78583	8.91297	8.72912	8.80545	8.85493	8.67555	8.75399	8.65973	8.80471	8.87664	8.90963	9.10616	9.09058	8.8757	8.92481	8.98919	8.97288	9.02886	8.96383	8.86089	8.87688	8.89617	8.29215	8.41589	8.28356	8.20832	8.33833	8.39673	8.54236	8.31835	8.59707	8.54066	8.39992	8.46935	8.81239	8.76728	8.76149	8.78036	9.03546	8.9299	8.98852	8.87798	8.33054	8.31446	8.48593	8.46998	444.994	-0.0857575
ENSMUSG00000003469	8.19859	8.08695	7.95016	7.84796	7.74293	8.40001	8.46376	8.39858	8.26979	8.23504	8.08548	9.10639	8.50937	8.27519	8.62968	8.70576	8.59898	9.13764	9.44902	9.16541	9.58801	9.00222	9.13268	8.85466	8.83455	8.92496	9.01966	8.9657	8.52688	9.17475	9.0435	8.57142	8.5605	8.55245	8.4129	8.07857	7.79544	8.42078	8.19677	8.63032	8.6448	9.25069	9.24097	8.87139	8.83741	8.92989	8.50862	254.871	-0.593329
ENSMUSG00000003476	NA	NA	NA	NA	NA	NA	NA	NA	NA	NA	NA	1.30577	1.42061	1.27808	1.28898	1.30812	1.38527	NA	NA	NA	NA	NA	NA	NA	NA	NA	NA	NA	NA	1.76315	1.96216	1.84191	1.90195	1.94339	1.97855	NA	NA	NA	NA	1.33482	1.32746	NA	NA	NA	NA	1.85574	1.9413	NA	NA
ENSMUSG00000003500	4.75205	4.82963	4.75296	4.71501	4.73849	5.36659	5.56047	5.48533	5.34711	5.52376	5.19418	5.69099	5.61438	5.26798	5.40401	5.65234	5.52345	5.81264	6.19289	6.03506	6.10856	6.08555	5.96297	5.52614	5.56675	5.55012	5.61505	5.65624	5.31651	5.98037	5.82384	5.56859	5.48094	5.40333	5.66156	4.77821	4.72675	5.4708	5.35501	5.52445	5.5266	6.01353	6.05236	5.54767	5.52927	5.79093	5.51528	27.1774	-0.30179
ENSMUSG00000003518	7.70027	7.89048	7.85172	7.75269	7.91522	7.72702	7.98201	7.85108	7.87956	8.02149	7.90553	8.26341	8.25339	8.20604	8.12764	8.14714	8.23545	8.05698	8.27681	8.24064	8.15682	8.30605	8.20438	7.81416	7.76334	7.77839	7.73967	7.90967	7.67667	8.16527	8.20202	8.02853	8.64075	8.65007	8.77886	7.81415	7.83396	7.85337	7.93553	8.24095	8.17008	8.19148	8.22242	7.78529	7.77534	8.13194	8.68989	227.082	0.0450283
ENSMUSG00000003526	8.95553	8.89157	9.41086	9.02117	9.11171	8.93211	9.11225	9.11799	9.05945	8.87887	9.28025	8.99202	9.1317	9.27817	8.82952	9.1039	9.00074	9.19844	8.97364	8.99685	8.98486	8.79696	9.00372	7.72522	8.04043	8.07661	7.8925	7.92321	8.27618	8.4708	8.06356	8.58718	8.61847	8.31305	8.12697	9.08599	9.06644	9.05412	9.07286	9.13396	8.97805	9.05631	8.92851	7.94742	8.03063	8.37385	8.35283	551.13	-0.0803166
ENSMUSG00000003527	5.36615	5.29804	5.34142	5.35863	5.38093	5.34626	5.58442	5.50501	5.39069	5.41629	5.6972	5.67434	5.70003	5.83786	5.59021	5.78375	5.69876	5.9531	5.89208	5.87587	5.91481	5.90154	5.80744	4.94667	4.92335	4.86077	4.7484	4.99113	4.94728	5.42888	5.35162	5.30174	5.46553	5.25373	5.20035	5.3352	5.36978	5.47857	5.50139	5.73741	5.69091	5.90702	5.8746	4.91026	4.8956	5.36075	5.30654	40.7237	0.150098
ENSMUSG00000003528	7.96623	7.92994	8.04362	7.96293	8.14368	7.80038	7.94754	7.74289	7.79427	7.92076	8.08285	8.02358	8.01041	8.11155	7.89161	8.01061	7.92365	7.87394	7.84515	7.77932	7.69616	7.67774	7.88832	7.09808	7.26185	7.1564	7.02626	7.58649	7.59717	7.44101	7.17441	7.60666	7.94859	7.76523	7.90244	7.97993	8.0533	7.83027	7.93263	8.04851	7.94196	7.8328	7.75407	7.17211	7.40331	7.40736	7.87209	258.283	0.15686
ENSMUSG00000003531	6.93036	7.06067	7.03482	7.05939	7.20883	6.70494	6.88559	6.74956	6.82742	6.95347	7.07774	6.92105	7.29992	7.19386	7.06275	7.06512	7.16487	6.8785	7.14444	7.1614	6.91722	7.33831	7.18007	6.61489	6.58536	6.67586	6.57512	6.5965	6.4445	6.97735	6.86602	7.10754	6.84149	6.91261	6.97262	7.00862	7.13411	6.78003	6.95288	7.13828	7.09758	7.06144	7.1452	6.62537	6.53871	6.98364	6.90891	133.856	0.310358
ENSMUSG00000003534	9.42313	9.56104	9.60497	9.50947	9.72442	9.35847	9.47869	9.41158	9.41433	9.58481	9.73901	9.66666	10.022	9.75755	9.70029	9.65185	9.8321	9.36453	9.6392	9.83711	9.41059	10.2243	9.9226	9.51428	9.43819	9.48336	9.40399	9.86629	10.0076	9.67764	9.91552	10.0392	11.1634	11.2868	11.3383	9.52971	9.61695	9.41625	9.57939	9.81541	9.72808	9.61361	9.85249	9.47861	9.75928	9.87745	11.2628	761.167	0.156865
ENSMUSG00000003541	4.45347	4.4474	4.44121	4.36385	4.49525	4.32824	4.17977	4.25763	4.28231	4.25017	4.29943	4.54654	4.69549	4.57086	4.62941	4.63049	4.74198	4.38823	4.9027	4.73956	4.47495	4.88063	4.71765	4.37998	4.52149	4.3811	4.17495	4.39172	4.47911	4.5031	4.63543	4.92553	4.93136	4.81738	5.04119	4.44736	4.42955	4.25522	4.27731	4.6043	4.66729	4.67683	4.69108	4.42752	4.34859	4.68802	4.92998	21.6214	-0.0980337
ENSMUSG00000003545	NA	NA	NA	NA	NA	NA	NA	NA	NA	NA	NA	3.03569	2.85715	2.87183	2.9663	2.9293	2.88739	3.14136	3.36967	3.35535	3.58365	3.24753	3.15793	2.7411	2.76943	2.95438	2.76582	2.84402	2.74915	3.65878	3.95927	3.65346	3.65578	3.58805	3.88069	NA	NA	NA	NA	2.92156	2.92766	3.28879	3.3297	2.82164	2.78633	3.75717	3.70817	NA	NA
ENSMUSG00000003546	6.12911	6.26016	6.27226	6.12289	6.30106	6.11479	6.25678	6.14178	6.22221	6.1879	6.1978	6.37704	6.2584	6.34095	6.13268	6.27564	6.13858	6.01314	6.11624	6.02361	6.16334	5.92239	6.17779	5.0976	5.02666	5.19954	5.22186	5.40183	5.25201	5.84415	5.73946	5.5364	5.81217	5.61912	5.9573	6.22051	6.21197	6.17112	6.20263	6.32546	6.1823	6.051	6.08784	5.10794	5.2919	5.70667	5.7962	74.5432	-0.0144933
ENSMUSG00000003549	6.42579	6.49291	6.40077	6.50193	6.35805	6.2115	6.30342	6.35078	6.40313	6.30099	6.45819	6.49859	6.64561	6.80082	6.62903	6.60973	6.59276	6.82503	6.93762	6.97737	6.79596	6.81324	6.86633	6.0099	6.11002	6.26401	6.08838	6.14516	6.35498	6.23916	6.07047	6.17731	6.18937	5.93257	6.41668	6.43982	6.42999	6.28857	6.38744	6.64834	6.61051	6.91334	6.82517	6.12797	6.19617	6.16231	6.17954	87.0971	-0.0292001
ENSMUSG00000003559	7.75254	7.79382	7.89558	7.83036	7.7816	7.84428	8.02239	7.78095	7.82316	7.94797	7.82095	7.95055	7.96261	8.1707	8.07583	7.98995	7.91371	8.07098	7.79856	7.71129	7.85245	7.73518	7.91254	7.1196	7.37085	7.32976	7.16659	7.35604	7.45525	7.41727	7.21491	7.35126	7.53987	7.52242	7.45593	7.81398	7.80598	7.88254	7.86403	8.02795	7.99316	7.86028	7.83339	7.2734	7.32596	7.32781	7.50608	224.918	-0.0222632
ENSMUSG00000003573	6.22994	6.26873	6.25001	6.50302	6.41532	6.2012	6.23761	6.14797	6.14037	6.32364	6.43845	6.30198	6.44254	6.36024	6.51145	6.36532	6.37096	6.3189	6.47502	6.45051	6.17613	6.35642	6.57839	5.59597	5.83827	5.79711	5.60375	5.84741	6.04454	5.51809	5.56206	6.10186	6.2188	6.40276	6.19834	6.24956	6.45917	6.19559	6.30082	6.36825	6.41591	6.41481	6.37031	5.74379	5.8319	5.72734	6.2733	81.53	0.616316
ENSMUSG00000003575	6.47932	6.54629	6.42886	6.41653	6.4799	6.74776	6.8963	6.85631	6.81002	6.91039	6.95873	7.21149	7.12222	6.87409	7.08875	7.14099	7.12921	7.4841	7.58245	7.53179	7.75608	7.5561	7.55189	6.85547	6.70366	6.93608	6.92749	6.90041	6.62931	7.45059	7.62128	7.20379	6.96747	7.21118	7.14885	6.48482	6.44822	6.83346	6.89304	7.06927	7.11965	7.53278	7.62136	6.83174	6.81907	7.42522	7.10917	88.8422	-0.10253
ENSMUSG00000003581	8.01632	8.07899	8.33488	8.1603	8.31974	8.00571	8.25385	8.17938	8.04831	8.37209	8.24581	8.10749	8.60578	8.41529	8.1951	8.37927	8.41071	8.12753	8.32631	8.57742	8.08726	8.54735	8.48273	7.72319	7.73155	7.59989	7.70487	7.67796	7.87401	8.04868	8.01834	8.21742	7.62018	7.76249	8.07035	8.1434	8.24002	8.14631	8.22207	8.37619	8.32836	8.34375	8.37245	7.68487	7.75228	8.09481	7.81767	292.993	0.178012
ENSMUSG00000003585	9.62477	9.59706	9.86195	9.67496	9.6683	9.68548	9.78231	9.66044	9.78167	9.71202	9.93114	9.74376	9.80119	9.98209	9.75146	9.76748	9.69987	9.87485	9.61279	9.61199	9.67627	9.40641	9.69909	8.82807	8.98397	9.01384	8.95818	8.977	9.21686	9.05643	8.82664	9.13161	8.69579	8.60362	8.85719	9.6946	9.67163	9.70941	9.80828	9.84235	9.7396	9.69988	9.59393	8.94196	9.05068	9.00489	8.71887	827.375	-0.0519932
ENSMUSG00000003604	4.21244	4.14456	4.29785	4.19888	4.19824	4.34933	4.31549	4.3253	4.48334	4.29193	4.4651	4.61323	4.65372	4.67565	4.55106	4.61832	4.72635	4.948	4.70347	4.76848	4.79764	4.92981	4.83644	4.09631	4.1887	4.1375	4.22279	4.10533	4.1174	4.29049	4.3201	4.41391	4.41685	4.33668	4.21795	4.21828	4.19856	4.33004	4.41346	4.64753	4.63191	4.80665	4.85463	4.14084	4.14851	4.3415	4.32383	18.5541	-0.170071
ENSMUSG00000003617	7.61711	7.78931	7.57889	7.67245	7.81857	7.61573	7.15667	7.4736	7.47389	7.27202	7.39858	7.66358	8.01091	7.94248	7.98567	7.90679	8.18862	8.31806	8.22173	8.29426	8.20849	8.67664	8.33268	8.64166	8.46245	8.71156	8.58718	8.64809	8.71471	8.45771	8.88638	8.77491	10.5111	10.6324	10.4155	7.66177	7.74551	7.41533	7.38149	7.87232	8.02703	8.27802	8.40594	8.60523	8.64999	8.70633	10.5197	208.384	0.179598
ENSMUSG00000003623	9.80434	9.6898	9.97814	9.96815	9.85563	9.88821	9.90606	9.8443	9.94648	9.63399	9.85129	9.99113	9.65025	9.97265	10.0306	9.89971	9.81289	10.555	9.94842	9.88081	10.2884	9.4823	9.86666	8.98482	9.33608	9.30943	9.1699	9.42777	9.63583	9.18135	8.99787	9.3664	9.18741	8.93972	9.09604	9.8241	9.91189	9.87952	9.81059	9.87134	9.91439	10.1281	9.87912	9.21011	9.41117	9.18187	9.07439	934.66	0.138849
ENSMUSG00000003644	5.38982	5.51068	5.46518	5.51714	5.47227	5.47608	5.45513	5.5388	5.45827	5.611	5.50973	5.27137	5.33684	5.50534	5.52939	5.44626	5.42077	5.4585	5.51364	5.49612	5.39002	5.42545	5.38881	4.91147	5.12894	5.25699	4.77506	5.268	5.19433	5.28586	5.39908	5.27561	5.72447	5.69201	5.76201	5.45523	5.4947	5.49	5.52633	5.37118	5.46547	5.48942	5.40143	5.09913	5.07913	5.32018	5.72617	44.5277	0.156754
ENSMUSG00000003657	7.73871	7.73716	7.09034	7.13067	6.9179	8.05922	7.96194	7.67898	7.80491	7.75332	7.2292	7.75852	7.66302	7.20815	7.84847	7.86857	7.64444	8.15232	8.23997	8.33881	8.27669	8.03222	8.1453	8.0679	7.67171	7.34793	7.59993	7.50028	7.27802	7.82784	7.82623	7.47646	7.45902	7.19702	7.48049	7.52207	7.02428	7.90005	7.59581	7.54323	7.78716	8.2437	8.1514	7.69585	7.45941	7.71018	7.37885	175.939	-1.23697
ENSMUSG00000003660	9.18972	9.15453	9.40929	9.22788	9.18119	9.40676	9.61819	9.48607	9.41675	9.20441	9.50093	9.56477	9.2378	9.42657	9.3396	9.41425	9.16651	9.81235	9.48835	9.24254	9.91024	9.09054	9.42438	8.64494	8.84838	8.79469	8.9096	8.81573	8.81158	8.9232	8.84373	8.79859	8.91526	8.70863	8.79996	9.25118	9.20454	9.50367	9.37403	9.40971	9.30679	9.51441	9.47505	8.76267	8.84564	8.85518	8.80795	604.521	-0.0944915
ENSMUSG00000003662	6.04958	6.10923	6.24694	6.12735	6.24419	6.23321	6.5339	6.46394	6.24987	6.47708	6.43529	6.21178	6.28809	6.21944	6.15255	6.22831	6.14536	6.27051	6.40109	6.3448	6.36648	6.13941	6.41133	5.41861	5.31296	5.40792	5.34158	5.23722	5.30739	5.78993	5.57726	5.53764	5.43459	5.55459	5.65616	6.13525	6.18577	6.41035	6.38741	6.23977	6.17541	6.3388	6.30574	5.37983	5.2954	5.63494	5.54845	71.4268	0.156841
ENSMUSG00000003680	6.63564	6.51987	6.50861	6.57396	6.68663	6.36172	6.51854	6.58605	6.4096	6.49062	6.58772	6.70532	7.02443	6.82153	6.88409	6.89449	6.89234	6.77996	6.82702	6.96029	6.65272	7.02527	6.99708	6.25594	6.27723	6.23476	6.15499	6.16152	6.20721	6.71174	6.8459	6.75117	6.52696	6.56014	6.68088	6.5547	6.6303	6.48877	6.49598	6.85043	6.89031	6.85575	6.89169	6.25598	6.17458	6.7696	6.58933	96.1953	0.212248
ENSMUSG00000003721	7.16279	7.22506	7.02511	7.16355	7.24194	7.11298	6.94623	7.09038	7.09105	7.02183	6.9669	7.43554	7.52161	7.46776	7.59171	7.46902	7.49377	7.60007	7.65663	7.76968	7.60097	7.92762	7.85613	7.79874	7.64943	7.62831	7.78662	7.59389	7.52604	7.57153	7.70355	8.03565	7.68415	7.87843	7.90043	7.13766	7.20274	7.04986	7.02659	7.47497	7.51817	7.67546	7.79491	7.69216	7.63552	7.77025	7.821	143.969	0.152099
ENSMUSG00000003731	7.99775	7.83732	7.95712	7.99709	8.02503	8.12618	8.20268	8.21879	8.00055	8.14739	8.14771	8.34348	8.06818	8.18643	8.18291	8.27658	8.11067	8.35995	8.38386	8.42065	8.53129	8.04739	8.33489	7.56794	7.75597	7.82563	7.84586	7.76264	7.82957	8.07239	8.00338	7.77251	7.94438	7.74174	8.08097	7.93073	8.01106	8.18255	8.09855	8.19936	8.19005	8.38816	8.30452	7.71651	7.81269	7.94943	7.92237	250.047	0.15895
ENSMUSG00000003746	7.44704	7.48062	7.06848	7.21729	7.06447	7.48622	7.34455	7.47792	7.51254	7.43194	7.03857	8.00872	7.96846	7.66456	8.04311	7.94442	8.04935	8.49889	8.4412	8.42711	8.54549	8.80669	8.52435	9.11609	8.85012	9.00512	9.13178	8.99871	8.7549	8.82148	8.88946	8.66521	9.4257	9.61853	9.41107	7.33205	7.14088	7.43623	7.32768	7.88058	8.01229	8.45574	8.62551	8.99044	8.9618	8.79205	9.4851	157.225	-0.478523
ENSMUSG00000003752	3.83425	3.92504	3.83552	3.83755	3.86277	3.79986	4.03373	3.95653	3.90245	3.88484	4.10724	4.08934	4.14813	4.10915	4.02881	4.08633	4.09491	3.82276	3.7619	3.72472	3.95176	3.77526	3.87534	3.56746	3.64986	3.61303	3.62653	3.62632	3.6461	4.01381	3.88565	3.96412	4.35075	3.87346	4.1439	3.86494	3.85016	3.93004	3.96485	4.11554	4.07002	3.76979	3.86745	3.61012	3.63298	3.95453	4.1227	14.5876	-0.142605
ENSMUSG00000003762	4.51507	4.55172	4.48376	4.46128	4.54928	4.64878	4.60992	4.7587	4.66923	4.73821	4.7369	4.80734	4.73036	4.81338	4.80303	4.72123	4.66989	4.57857	4.96067	4.9778	4.7388	4.65996	4.9933	4.02832	3.83265	3.87583	3.8263	3.96836	3.81323	4.50548	4.45289	4.40506	4.52161	4.41932	4.6356	4.51685	4.50528	4.67247	4.71478	4.78369	4.73138	4.83901	4.79735	3.91227	3.86929	4.45448	4.52551	22.8015	-0.064088
ENSMUSG00000003778	8.16347	8.0553	8.02323	8.08901	8.03031	8.29232	8.24401	8.17954	8.32154	8.21075	8.34049	8.41627	8.38442	8.3776	8.39036	8.4442	8.43258	8.8059	8.56683	8.6395	8.81553	8.6316	8.70368	8.15322	8.18038	8.22126	8.23099	8.15027	8.10449	8.37347	8.18467	8.32531	8.16766	8.24507	8.13738	8.08067	8.05966	8.23862	8.29093	8.39277	8.42238	8.67074	8.71694	8.18495	8.16192	8.29448	8.18337	269.757	-0.0460469
ENSMUSG00000003779	NA	NA	NA	NA	NA	NA	NA	NA	NA	NA	NA	NA	NA	NA	NA	NA	NA	NA	NA	NA	NA	NA	NA	NA	NA	NA	NA	NA	NA	1.87688	1.8208	1.8128	1.90902	1.95021	2.06813	NA	NA	NA	NA	NA	NA	NA	NA	NA	NA	1.83683	1.97579	NA	NA
ENSMUSG00000003808	5.78073	5.70968	5.75194	5.78509	5.81959	5.75714	6.04765	5.90844	5.96788	5.99396	5.98444	5.81708	5.88226	5.87533	5.53131	5.86162	5.65752	5.83054	5.916	6.01234	5.81271	5.60076	5.95198	4.6059	4.90457	4.9334	4.89381	5.03606	4.87957	5.53188	5.51873	5.25838	5.24365	5.49511	5.46565	5.74745	5.80234	5.90441	5.98209	5.85822	5.68349	5.91963	5.78848	4.81462	4.93648	5.43633	5.40147	54.519	0.200809
ENSMUSG00000003809	7.18703	7.22491	7.36583	7.34525	7.22492	7.25825	7.5873	7.38103	7.29764	7.48819	7.55987	7.25909	7.45702	7.33558	7.17154	7.32369	7.2027	7.43972	7.38136	7.28066	7.42744	7.11611	7.40949	6.20205	6.20322	6.26497	6.24892	6.16024	6.34744	6.48805	6.29919	6.49406	6.34605	6.26764	6.47594	7.25925	7.28508	7.40886	7.44857	7.35057	7.23264	7.36725	7.31768	6.22341	6.2522	6.4271	6.36321	154.971	0.0519342
ENSMUSG00000003810	6.76787	6.82381	6.7041	6.83641	6.74902	6.85243	6.75073	6.72329	6.71337	6.9342	6.72264	7.17885	7.24678	7.04479	7.16221	7.22309	7.08	7.31664	7.33251	7.55743	7.39405	7.58545	7.32841	7.40605	7.18427	7.33269	7.23545	7.25404	7.24703	7.03677	7.04198	7.30895	7.33208	7.41965	7.46594	6.76526	6.79271	6.77549	6.79007	7.15681	7.1551	7.40219	7.43597	7.30767	7.24551	7.12923	7.40589	110.013	0.0689877
ENSMUSG00000003812	6.89922	6.98837	7.15931	7.06683	7.19799	6.89087	7.01048	6.88853	6.84819	7.03317	7.13189	6.84905	7.22914	7.33394	7.12716	7.18852	7.23849	7.18664	7.10618	7.27045	7.00739	7.39243	7.29153	6.75987	6.7776	6.80292	6.76619	6.57094	6.79962	6.72731	6.97023	7.04258	6.58733	6.58291	6.68165	7.01563	7.13241	6.92996	7.00442	7.13738	7.18472	7.18776	7.23045	6.78013	6.71225	6.91337	6.6173	134.512	0.273963
ENSMUSG00000003813	8.11954	8.27995	8.30195	8.22252	8.24017	8.33517	8.40319	8.30133	8.43172	8.52568	8.51954	8.50652	8.78308	8.6324	8.65257	8.65979	8.67526	8.78767	8.75989	8.79139	8.6222	8.90776	8.75552	8.11082	8.11865	8.05601	8.03545	8.08818	8.10594	8.36702	8.30365	8.51287	8.24003	8.34059	8.42713	8.23382	8.23135	8.34656	8.49232	8.64066	8.66254	8.77965	8.76183	8.09516	8.07652	8.39451	8.33592	301.54	-0.0107335
ENSMUSG00000003814	12.1745	12.1912	12.1592	12.3453	12.2025	12.3764	12.2742	12.3493	12.4657	12.3645	12.1199	12.5619	12.7933	12.6458	12.7598	12.666	12.8244	12.9322	12.9191	13.0731	12.9246	13.2185	13.0958	13.1804	13.1184	13.1093	13.2334	13.03	12.9491	12.7924	13.1154	13.0267	12.4767	12.6413	12.9248	12.175	12.2739	12.3333	12.3167	12.667	12.75	12.9748	13.0796	13.1361	13.0708	12.9781	12.6809	4764.42	0.161863
ENSMUSG00000003824	3.04755	3.01884	2.9535	2.99687	2.99978	3.7935	3.62756	3.75361	3.68746	3.90928	3.70576	3.62645	3.68912	3.66728	3.69526	3.61338	3.6344	3.3533	3.4677	3.51723	3.38372	3.73018	3.55927	3.95028	3.85098	3.93547	3.7922	4.0024	3.95572	3.46217	3.50982	3.65685	3.86792	3.8024	3.46056	3.00663	2.99833	3.72489	3.7675	3.66095	3.64768	3.44608	3.55772	3.91224	3.91677	3.54295	3.71029	8.10602	-0.140795
ENSMUSG00000003847	8.71526	8.68789	8.54631	8.77725	8.58092	8.84784	8.5847	8.60818	8.60659	8.3628	8.60547	8.92454	8.81729	8.88114	9.0068	8.94965	8.90716	9.25691	9.07312	9.05874	9.26688	9.07052	9.13068	9.18298	9.02915	9.02615	9.07503	9.04786	8.97552	8.86309	9.06474	9.10451	9.00758	8.93233	8.66074	8.64982	8.67908	8.68024	8.52495	8.87432	8.95454	9.12959	9.15603	9.07943	9.0328	9.01078	8.86688	407.108	0.0556356
ENSMUSG00000003848	5.90189	5.94004	5.74808	5.83973	5.7887	5.94791	5.98411	5.99929	5.96584	5.84082	5.99876	6.10778	6.04054	6.23735	6.04617	6.10959	5.97133	6.29162	6.05731	6.17924	6.2499	6.06757	6.12969	5.32356	5.45286	5.27778	5.37414	5.33413	5.38395	5.90817	5.99683	5.83827	5.57995	5.49152	5.73719	5.86334	5.81422	5.9771	5.93514	6.12856	6.04237	6.17606	6.14905	5.3514	5.36408	5.91443	5.60289	57.9993	-0.186551
ENSMUSG00000003849	7.11885	6.97498	7.25662	7.20698	7.20656	7.08	7.11812	7.06581	7.06739	6.9409	7.1291	7.13904	7.03946	7.25909	7.03552	7.10643	7.09868	7.2159	7.13462	7.02603	7.08189	6.78145	7.1409	6.27575	6.31783	6.4826	6.22727	6.2268	6.7649	6.41454	6.44643	6.46562	6.83989	6.57406	6.38531	7.11682	7.20677	7.08798	7.04579	7.14586	7.08021	7.12551	7.00141	6.35873	6.40633	6.44219	6.59975	143.132	0.19563
ENSMUSG00000003863	5.90118	5.85717	5.79772	5.77495	5.73653	6.27193	6.55297	6.49409	6.30395	6.41695	6.19761	6.87181	6.40825	6.27607	6.57044	6.6759	6.49924	7.00578	7.46181	7.10752	7.3797	6.9481	7.14064	6.65582	6.70239	6.66108	6.7443	6.65998	6.12998	6.98967	6.91004	6.48914	6.6488	6.58289	6.66276	5.85202	5.75574	6.43966	6.30617	6.51871	6.58186	7.1917	7.15615	6.6731	6.51142	6.79628	6.63149	56.6529	-0.357391
ENSMUSG00000003865	7.55988	7.63856	8.01358	7.60728	7.79177	7.65313	7.84601	7.84925	7.7854	7.73718	8.03896	7.44309	7.47869	7.58646	7.2833	7.57048	7.39082	7.60596	7.57431	7.50994	7.69244	7.21224	7.56884	6.31308	6.40009	6.51732	6.46971	6.4457	6.61417	6.72567	6.6667	6.74233	6.1493	6.38475	6.61575	7.73734	7.69953	7.7828	7.85385	7.50275	7.41487	7.5634	7.49117	6.41016	6.50986	6.71157	6.38327	214.855	-0.11112
ENSMUSG00000003868	7.19796	7.26024	7.15443	7.10876	7.16479	7.26739	7.27835	7.18563	7.27089	7.28516	7.38677	7.34295	7.42678	7.3857	7.36846	7.36959	7.33196	7.45691	7.36873	7.34922	7.47846	7.27232	7.44474	6.37897	6.49749	6.34873	6.48176	6.39737	6.66074	6.78238	6.58843	6.75058	6.45941	6.53126	6.82219	7.20421	7.13678	7.24379	7.31427	7.38514	7.35667	7.39162	7.39851	6.4084	6.51329	6.70713	6.60429	145.056	-0.158375
ENSMUSG00000003872	4.82559	4.75888	4.75704	4.64903	4.61039	5.17607	5.22685	5.25294	5.10015	5.37611	4.95525	5.92956	5.71207	5.29476	5.62656	5.62867	5.62629	6.14277	6.43739	6.34348	6.41108	6.38458	6.29689	5.64988	5.55482	5.46047	5.59514	5.65351	5.28986	6.35603	6.18523	5.73603	5.88952	5.89578	5.93064	4.78051	4.62971	5.21862	5.14384	5.64546	5.62717	6.30788	6.36418	5.55506	5.51284	6.09243	5.90532	26.8644	-0.950886
ENSMUSG00000003873	5.61145	5.66202	5.7243	5.66843	5.80269	5.49703	5.63792	5.56465	5.48214	5.67196	5.71626	5.6603	5.93099	5.89088	5.65341	5.71396	5.70766	5.55048	5.85466	5.65112	5.50838	5.84643	5.80597	4.62704	4.77811	4.64751	4.73049	4.98722	4.70648	5.50238	5.28572	5.59927	5.65821	5.84752	6.01796	5.66592	5.73556	5.56653	5.62345	5.82739	5.69168	5.68542	5.72026	4.68422	4.80806	5.46246	5.84123	51.7327	0.269178
ENSMUSG00000003923	7.7714	7.56326	7.56981	7.79368	7.60186	7.79467	7.49441	7.6068	7.67549	7.23943	7.38533	7.8179	7.69087	7.91368	7.91352	7.86385	7.82833	8.34425	8.05083	8.08506	8.17959	7.91312	7.99508	7.80372	7.96641	7.77474	7.90633	7.83924	7.7263	7.88073	7.74916	7.75015	7.76522	7.56394	7.54967	7.63482	7.69777	7.63196	7.43342	7.80749	7.86857	8.16005	8.02927	7.84829	7.82396	7.79335	7.62628	203.98	0.13018
ENSMUSG00000003929	5.73692	5.74295	5.58161	5.75228	5.47477	5.77491	5.5354	5.57099	5.69916	5.43957	5.51032	5.92683	5.60421	5.78427	5.7277	5.85359	5.78192	6.26055	5.8339	5.75181	6.06333	5.89833	5.84956	6.16082	6.21377	6.28841	6.14343	6.24488	6.26806	5.89384	5.78674	5.83586	5.74879	5.73862	5.52042	5.68716	5.61352	5.6271	5.54968	5.77177	5.78774	5.94875	5.93707	6.221	6.21879	5.83882	5.66928	51.8209	-0.26362
ENSMUSG00000003934	5.97379	6.00593	5.80651	5.80938	5.8275	6.00319	6.26895	6.08844	5.96882	6.35093	5.87569	6.58618	6.63362	6.1008	6.51774	6.56718	6.68021	6.65485	7.06803	7.31823	7.02215	7.30735	6.92252	6.71131	6.54035	6.47517	6.64172	6.46609	6.21656	6.95973	7.39958	6.97871	7.21315	7.17384	7.44752	5.92874	5.81844	6.12019	6.06515	6.4402	6.58837	7.01371	7.08401	6.57561	6.44146	7.11267	7.27817	59.791	-0.401155
ENSMUSG00000003948	4.9631	4.88327	4.95586	4.89337	4.96678	5.16037	5.06604	5.02372	5.10063	4.99	4.85576	5.70244	5.55913	5.25525	5.54455	5.59328	5.59868	6.0147	6.17683	6.1574	6.36833	6.20072	5.84099	6.31559	6.31414	6.27687	6.37727	6.27937	5.98842	6.31802	6.10339	6.07415	6.13041	6.33099	6.32459	4.93408	4.93007	5.08338	4.98213	5.50561	5.57884	6.11631	6.13668	6.3022	6.21502	6.16519	6.262	30.4635	-0.016933
ENSMUSG00000003949	9.91649	9.9427	9.98613	9.9523	9.8965	9.95353	10.0495	9.86331	10.0005	9.96383	10.0312	10.0483	10.223	10.2242	10.1183	10.0259	10.1408	10.1865	10.1192	10.2097	10.0618	10.0921	10.2588	9.50831	9.62262	9.70907	9.54609	9.34106	9.69898	9.67053	9.66875	9.86437	8.82197	8.94576	8.85124	9.94844	9.9244	9.95546	9.9985	10.1652	10.095	10.1718	10.1376	9.61333	9.52871	9.73455	8.87299	982.076	-0.0417519
ENSMUSG00000003955	9.04744	9.17304	9.10503	9.10791	9.0562	9.13171	9.03076	8.97789	9.19994	9.09753	9.16595	9.22774	9.37537	9.41251	9.26544	9.27052	9.33011	9.41167	9.25359	9.41288	9.23345	9.27953	9.41059	8.87279	8.9336	8.88203	8.83756	8.8773	8.90854	8.86385	8.93028	9.09598	9.05317	8.98895	8.99816	9.10851	9.08205	9.04679	9.15448	9.33854	9.28869	9.35938	9.30786	8.89614	8.87447	8.96337	9.01343	548.746	-0.0497874
ENSMUSG00000003970	9.45146	9.54747	9.65657	9.52072	9.5641	9.65749	9.56531	9.71259	9.52764	9.59767	9.9802	9.75285	9.94869	10.136	9.70418	9.79042	9.8784	10.0646	9.96503	9.89519	9.91966	9.94085	9.89727	8.90898	9.10707	9.04191	9.06114	9.2195	9.19127	9.70197	9.49868	9.55547	9.25642	9.13753	9.43206	9.55183	9.54241	9.64513	9.70184	9.94586	9.791	9.97493	9.91926	9.01932	9.1573	9.58537	9.27534	750.374	-0.0217016
ENSMUSG00000003974	12.4159	12.3627	12.389	12.5756	12.5321	12.4642	12.2863	12.2624	12.4331	12.3014	12.2298	12.5984	12.5775	12.7369	12.6489	12.5558	12.664	12.8488	12.7062	12.7185	12.7244	12.867	12.7303	12.8682	12.9184	12.9445	12.9249	12.587	12.883	12.2331	12.5039	12.7063	11.3908	11.5458	11.5864	12.3892	12.5538	12.3376	12.3214	12.6376	12.6229	12.7578	12.7739	12.9104	12.7983	12.4811	11.5077	5635.69	0.262816
ENSMUSG00000003992	8.43125	8.41262	8.39417	8.45515	8.47423	8.46972	8.31045	8.45008	8.39707	8.46408	8.39916	8.75092	8.69794	8.74415	8.67716	8.70966	8.70634	8.79061	8.82428	8.74723	8.72479	8.64223	8.68226	8.36202	8.36374	8.3249	8.29377	8.25421	8.416	8.4478	8.40013	8.62815	8.15429	8.2925	8.25912	8.41268	8.46469	8.41009	8.4201	8.731	8.69772	8.78737	8.6831	8.35022	8.32133	8.49203	8.23531	345.847	0.0998302
ENSMUSG00000004018	4.29465	4.20689	4.32123	4.30713	4.21083	4.24701	4.27191	4.33997	4.21155	4.34858	4.16528	4.96161	4.93067	4.91883	5.03191	4.92776	4.99176	5.17271	4.93546	4.95451	5.08373	4.88956	5.01762	4.84118	4.91793	4.91133	4.79987	4.8952	4.70363	4.76017	4.81556	4.87734	4.81235	4.72697	4.57977	4.27426	4.25898	4.2863	4.2418	4.93704	4.98381	5.02089	4.99697	4.89015	4.79957	4.81769	4.70636	19.4734	-0.123282
ENSMUSG00000004031	6.44066	6.46099	6.17962	6.10961	6.2835	6.63207	6.70442	6.54291	6.58242	6.843	6.43937	7.20149	7.01096	6.81447	7.07539	7.06229	7.02208	7.41362	7.58389	7.56607	7.66296	7.74104	7.44327	7.60211	7.23016	7.37544	7.46749	7.33149	7.0572	7.66926	7.9244	7.38852	7.7302	7.74487	7.72841	6.36042	6.19655	6.62647	6.6216	7.00897	7.05325	7.52119	7.61576	7.40257	7.28539	7.66073	7.73449	80.0766	-0.507083
ENSMUSG00000004032	12.0177	11.9967	12.3563	12.2657	12.1248	12.1112	12.3108	12.1133	12.2576	12.0868	12.2577	12.096	12.1133	12.3629	12.0337	12.1493	12.1234	12.2922	12.0979	12.031	12.0863	11.7705	12.1619	11.2777	11.4854	11.4838	11.3843	11.0996	11.5906	11.4934	11.3024	11.7248	10.8224	10.6655	10.5242	12.1236	12.1952	12.1784	12.2007	12.1907	12.1022	12.1404	12.0062	11.4156	11.3582	11.5069	10.6707	4599.26	0.0969673
ENSMUSG00000004035	5.95572	6.10422	6.03914	6.04112	6.02628	5.86581	6.05261	5.99935	6.04333	5.98059	5.92264	5.80389	6.207	6.08552	5.93515	6.15807	6.04647	6.09053	6.24263	6.15007	6.12146	6.16013	6.33856	5.59843	5.50312	5.78825	5.54908	5.47052	5.72134	5.82965	5.59241	5.74572	6.11755	5.86843	5.80548	6.03303	6.0337	5.97259	5.98219	6.03214	6.04656	6.16108	6.20671	5.62994	5.58031	5.72259	5.93049	65.7002	-0.00362713
ENSMUSG00000004040	9.57866	9.43787	9.6267	9.55434	9.51757	9.5144	9.64468	9.4508	9.55575	9.47752	9.65602	9.60375	9.60964	9.67985	9.60177	9.61565	9.53701	9.79522	9.51558	9.47998	9.68496	9.24691	9.53937	8.91122	9.03084	8.97177	8.94193	9.69268	9.70693	9.19533	8.921	9.30682	10.4016	10.1361	10.2753	9.54775	9.53596	9.53663	9.5631	9.63108	9.58481	9.59693	9.49041	8.97128	9.44718	9.14105	10.271	747.652	-0.0264027
ENSMUSG00000004043	4.7243	4.83279	4.82873	4.74847	4.85215	5.16274	5.31511	5.20436	5.1763	5.14728	5.33198	4.54473	4.73965	4.80507	4.62033	4.7386	4.59695	4.94137	4.91482	4.68569	4.82457	4.61606	4.83123	4.01977	3.95509	4.11663	4.15179	4.03121	4.14155	4.07172	4.29183	3.88529	4.16059	3.90735	4.1971	4.79528	4.80031	5.2274	5.21852	4.69648	4.65196	4.84729	4.75729	4.0305	4.10818	4.08295	4.08835	27.7708	0.0349379
ENSMUSG00000004044	5.97978	6.1313	6.2419	6.09678	6.16582	6.10155	6.27731	6.06105	6.24032	6.43849	6.34767	6.08062	6.2418	6.27399	6.10108	6.20788	6.21564	6.31371	6.21308	6.39655	6.16569	6.12486	6.3241	5.10032	5.46108	5.1549	5.19045	5.34597	5.45	5.9592	5.78181	6.00054	7.05383	6.78129	6.84078	6.11766	6.1313	6.14664	6.34216	6.1988	6.17486	6.30778	6.20488	5.23877	5.32881	5.91385	6.89197	70.0415	0.0287684
ENSMUSG00000004054	4.99748	5.179	5.17974	5.03554	5.07586	4.87746	4.94309	4.92357	4.94377	4.91828	4.93016	4.93162	5.03963	5.07477	4.93708	4.92508	4.94984	4.82125	4.96341	4.98648	4.78386	5.25826	5.04989	4.13346	4.08282	4.10997	4.0597	4.02789	4.09752	4.76096	4.92134	5.09699	5.19352	4.8945	5.15524	5.11874	5.0557	4.91471	4.93074	5.01534	4.93733	4.92371	5.03067	4.10875	4.0617	4.92643	5.08109	34.4212	-0.328136
ENSMUSG00000004056	8.68917	8.84376	9.1953	8.93868	9.13819	8.98067	9.03146	9.06102	9.01644	9.33429	9.16373	9.19379	9.44451	9.30656	9.20898	9.30133	9.2231	9.21917	9.1785	9.02739	9.04142	9.11514	9.19907	8.17615	8.25529	8.34076	8.22621	8.25679	8.41126	8.35353	8.42769	8.56991	8.06518	7.84936	8.19642	8.90941	9.03843	9.02439	9.17149	9.31495	9.24447	9.14169	9.11854	8.2574	8.29809	8.45038	8.03699	507.996	0.201013
ENSMUSG00000004069	7.56339	7.57771	7.7911	7.57593	7.61823	7.75527	7.89875	7.76035	7.86289	7.86854	7.81605	7.88377	7.75182	8.0289	7.72949	7.87683	7.68429	7.91144	7.90917	8.01377	7.9812	7.75353	8.00026	7.39657	7.47856	7.50252	7.38551	7.46023	7.40915	7.70587	7.55224	7.45532	7.63132	7.581	7.49834	7.64407	7.59708	7.80479	7.84916	7.88816	7.76354	7.9448	7.91166	7.45921	7.4183	7.57114	7.57022	198.323	-0.11288
ENSMUSG00000004070	8.3395	8.22888	8.22031	8.13876	8.11511	8.42522	8.34669	8.301	8.41071	8.35845	8.24804	8.58921	8.4984	8.50873	8.54588	8.50922	8.47352	8.69677	8.68634	8.59552	8.72289	8.41114	8.56043	8.16683	8.16966	8.23477	8.23822	8.2637	8.14609	8.36959	8.30096	8.3544	8.60213	8.34277	8.42249	8.26289	8.12693	8.35764	8.33907	8.53211	8.50954	8.65954	8.56482	8.19042	8.216	8.34165	8.4558	297.182	-0.272007
ENSMUSG00000004071	10.003	10.0847	9.86081	9.9616	9.9472	9.99978	9.80574	9.88078	9.95024	9.85084	9.9334	10.285	10.2715	10.1635	10.2363	10.1521	10.1884	10.2573	10.3134	10.3494	10.309	10.371	10.3084	9.80918	9.7779	9.86812	9.79782	9.82727	9.85356	10.0939	9.97358	10.0411	10.0615	9.8764	10.0368	9.98284	9.9544	9.89543	9.91149	10.24	10.1922	10.3067	10.3294	9.8184	9.82621	10.0362	9.99157	1007.13	-0.0546195
ENSMUSG00000004085	5.74596	5.71516	5.66051	5.8624	5.78487	5.57067	5.78019	5.59229	5.6581	5.59326	5.57697	5.59822	5.86399	5.86089	5.83382	5.81178	5.66585	5.89517	5.67592	5.92034	5.77774	5.93474	5.88632	5.4441	5.53732	5.56541	5.53426	5.64975	5.75638	5.82402	5.7405	5.90729	6.39276	6.73273	6.48648	5.70721	5.82363	5.64772	5.60944	5.77436	5.77048	5.83047	5.86627	5.51561	5.6468	5.82394	6.53732	54.3193	0.421852
ENSMUSG00000004096	9.35197	9.22115	9.24017	9.28487	9.08468	9.40373	9.05409	9.1837	9.40157	9.10504	9.20134	9.47294	9.39001	9.46835	9.47355	9.32163	9.46382	9.99174	9.49749	9.53622	9.71392	9.50682	9.60694	9.46045	9.57154	9.48664	9.47065	9.53625	9.64447	9.17135	9.14315	9.48153	9.4935	9.35537	9.28722	9.2711	9.18478	9.21384	9.23598	9.44377	9.41967	9.67515	9.60923	9.50621	9.55046	9.26534	9.3787	606.299	-0.150246
ENSMUSG00000004098	4.99229	5.11493	4.95222	4.91948	4.97686	4.93667	4.67412	4.94707	4.8417	4.78179	4.91987	4.87979	5.28173	5.02179	5.33795	5.13152	5.15088	5.2169	5.31093	5.66147	5.42091	5.99517	5.59205	4.66396	4.74551	4.82052	4.82897	4.85374	5.30992	5.40822	6.11162	5.9067	7.17565	7.09309	6.97452	5.01981	4.94817	4.85262	4.84779	5.0611	5.20678	5.39643	5.66937	4.74333	4.99754	5.80885	7.08109	32.1147	-0.37816
ENSMUSG00000004099	6.84766	6.75044	6.71462	6.79708	6.73401	7.13624	7.43672	7.17211	7.20866	7.24483	7.1429	7.15517	7.03467	7.00988	7.29377	7.16482	6.90655	7.47986	7.52719	7.51583	7.75302	7.08535	7.42736	6.5931	6.34182	6.54633	6.64478	6.30637	6.482	6.75055	6.58543	6.61749	6.13953	6.26088	6.60241	6.77091	6.76554	7.24836	7.1988	7.06657	7.12171	7.50763	7.42191	6.49375	6.47772	6.65115	6.33427	109.395	-0.0189335
ENSMUSG00000004100	4.62345	4.53971	4.51253	4.49243	4.50829	4.73219	5.00886	4.82318	4.84338	4.7111	4.88087	5.06542	4.86411	4.71225	4.96262	4.89942	4.85043	4.88953	4.72697	4.69939	4.75862	4.47709	4.70465	4.12415	4.17162	4.35962	4.17866	4.16345	4.08713	4.55447	4.54943	4.54591	4.59164	4.55817	4.7878	4.55856	4.50036	4.85474	4.81178	4.88059	4.90415	4.77196	4.64679	4.21846	4.14308	4.54994	4.64587	23.3494	-0.388903
ENSMUSG00000004105	5.3592	5.48018	5.44998	5.46869	5.39841	5.17746	5.0747	5.18657	5.21305	5.25942	5.27554	5.29529	5.39833	5.48788	5.52524	5.3927	5.49676	5.02903	5.2267	5.42967	5.02734	5.77085	5.31724	5.11999	4.90117	5.01102	5.20242	5.01298	5.05643	4.80198	5.0667	4.98556	5.22727	5.06753	5.06765	5.42979	5.43355	5.14624	5.24934	5.39383	5.47156	5.22847	5.37181	5.01073	5.09061	4.95141	5.12082	43.3807	0.00904527
ENSMUSG00000004110	8.06327	7.92246	7.56555	7.55207	7.62213	8.44704	8.51623	8.54229	8.38322	8.5986	7.91359	9.31021	9.142	8.26824	9.05678	9.22581	9.20816	9.79222	10.0509	10.1287	10.3588	10.3116	9.95806	10.2456	10.0147	10.0567	10.4345	9.78748	9.17369	10.2973	10.5208	9.93245	9.81386	9.984	9.92975	7.85042	7.5871	8.50186	8.29847	8.90681	9.16358	9.99061	10.2095	10.1057	9.79854	10.2502	9.9092	221.568	-0.599285
ENSMUSG00000004113	6.36727	6.35785	6.03321	6.02263	6.01405	6.70126	6.95402	6.81913	6.93826	6.91309	6.44545	7.56295	7.35881	6.82146	7.35101	7.41849	7.3795	7.625	8.12958	8.24192	8.1322	8.39205	7.9354	8.03278	7.86298	7.80652	8.20654	7.62421	7.27084	8.14497	8.34166	7.91449	7.8363	8.02568	7.84024	6.25278	6.01834	6.8248	6.7656	7.24774	7.383	7.99883	8.15322	7.90076	7.70053	8.13371	7.90074	73.9631	-0.794964
ENSMUSG00000004127	4.19494	4.1283	4.14791	4.22806	4.19188	4.16258	4.1869	4.13316	4.21139	4.13272	4.15024	4.05398	4.06126	4.1364	4.09589	4.07695	4.12779	4.36386	4.19409	4.1984	4.22404	4.12761	4.20556	4.14717	4.21601	4.2986	4.36608	4.33879	4.31277	4.30373	4.22723	4.40491	4.4091	4.34992	4.41772	4.15705	4.20997	4.16088	4.16478	4.08388	4.10021	4.25212	4.18574	4.2206	4.33921	4.31196	4.39225	18.1685	0.406392
ENSMUSG00000004151	6.47828	6.45299	6.40329	6.37889	6.35656	6.48424	6.332	6.49782	6.4037	6.32989	6.4106	6.93094	6.7477	6.74505	6.85867	6.87128	6.72593	6.948	7.15076	6.99575	7.05243	6.99776	6.91175	6.44572	6.47452	6.70728	6.41631	6.45864	6.53242	6.55894	6.53715	6.54756	6.41927	6.35521	6.74647	6.44485	6.36773	6.43802	6.3814	6.8079	6.81863	7.0315	6.98731	6.54251	6.46912	6.54788	6.50698	85.5745	-0.228842
ENSMUSG00000004187	5.39955	5.4585	5.43485	5.30424	5.36341	5.57294	5.95161	5.72016	5.64754	5.84478	5.67109	6.33139	6.28588	6.00875	6.23014	6.28778	6.15654	6.15754	6.49197	6.43964	6.32758	6.58685	6.2401	6.20907	6.23383	6.25966	6.35947	6.23771	5.804	6.65655	6.57555	6.35871	6.29129	6.66907	6.4113	5.43097	5.33383	5.74824	5.72114	6.20867	6.22482	6.36305	6.38484	6.23418	6.13373	6.53027	6.45722	42.1697	-0.418906
ENSMUSG00000004207	15.1695	15.2609	15.2366	15.3272	15.3806	15.229	15.2588	15.2212	15.2068	15.4052	15.3801	15.3438	15.8518	15.5517	15.5104	15.5649	15.7331	15.6106	15.6527	15.9452	15.5649	16.1294	15.9821	15.7084	15.5923	15.7238	15.738	15.2814	15.6517	15.5883	15.9179	15.8554	15.3865	15.6618	15.6633	15.2223	15.3539	15.2363	15.3307	15.5825	15.6028	15.7362	15.8921	15.6748	15.557	15.7872	15.5705	39758.2	0.207704
ENSMUSG00000004221	7.23947	7.26609	7.27847	7.14969	7.11885	7.14714	7.2541	7.16505	7.25313	7.17139	7.35906	7.49773	7.39947	7.42776	7.36391	7.50164	7.42246	7.69443	7.58044	7.4538	7.60363	7.4174	7.5874	7.00462	6.96593	7.09966	7.02587	7.02531	7.15111	7.19402	6.95519	7.08167	7.18514	7.09087	7.05475	7.26135	7.13427	7.18876	7.26119	7.44165	7.42933	7.57623	7.53614	7.02341	7.06743	7.07696	7.11025	148.718	-0.303108
ENSMUSG00000004231	NA	NA	NA	NA	NA	NA	NA	NA	NA	NA	NA	1.85257	1.87767	1.77497	1.82781	1.78106	1.86081	NA	NA	NA	NA	NA	NA	NA	NA	NA	NA	NA	NA	NA	NA	NA	NA	NA	NA	NA	NA	NA	NA	1.83507	1.82322	NA	NA	NA	NA	NA	NA	NA	NA
ENSMUSG00000004233	5.15313	5.16337	5.18019	5.27146	5.24788	5.11937	5.15539	5.24174	5.04985	5.11805	5.12264	5.6239	5.52003	5.5248	5.47336	5.44624	5.32892	5.41297	5.20087	5.43572	5.31376	5.1804	5.32446	4.68477	4.71345	4.64252	4.75509	4.87273	4.91076	5.07821	4.98402	5.25909	5.12456	5.12724	5.07651	5.16556	5.25967	5.17216	5.09684	5.55624	5.41617	5.34986	5.27287	4.68025	4.84619	5.1071	5.10943	36.915	0.432808
ENSMUSG00000004264	7.39264	7.48457	7.54891	7.37631	7.59422	7.38824	7.69914	7.58555	7.44207	7.72733	7.6995	7.84821	7.92074	7.82059	7.69882	7.86664	7.71519	7.73223	7.83298	7.92272	7.71721	7.70046	7.88804	7.01466	7.02706	7.17745	7.02822	7.08726	7.17186	7.23431	7.31056	7.37783	7.43416	7.28347	7.32663	7.47538	7.48526	7.55764	7.62297	7.86318	7.76021	7.82931	7.76857	7.07305	7.09578	7.30757	7.34809	179.007	0.0351318
ENSMUSG00000004267	9.19078	9.01901	8.72616	8.68887	8.52469	9.29728	9.69524	9.55296	9.37052	9.48168	9.04547	9.89714	9.35108	9.09161	9.51451	9.70618	9.37039	10.0227	10.3019	10.0856	10.4263	9.87021	10.0954	9.57905	9.53174	9.71224	9.65733	9.53638	9.16765	9.96244	9.8772	9.41286	9.4965	9.3867	9.50358	8.97865	8.60678	9.51516	9.29922	9.44661	9.53036	10.1367	10.1307	9.60768	9.45379	9.75083	9.46226	472.084	-0.713617
ENSMUSG00000004268	6.18645	6.32986	6.28573	6.27325	6.32231	6.27808	6.51305	6.4842	6.45028	6.64417	6.5303	6.64929	6.96898	6.79577	6.74193	6.67954	6.67723	6.54488	6.73267	6.74268	6.48162	6.69251	6.60968	5.88351	5.89904	5.88696	5.8773	5.96869	5.99008	6.2989	6.40151	6.60498	6.25856	6.45558	6.61937	6.26735	6.29778	6.42511	6.54158	6.80468	6.69957	6.67341	6.5946	5.88983	5.94536	6.43513	6.4445	77.7975	0.0907077
ENSMUSG00000004270	8.62044	8.66005	8.5392	8.76556	8.73302	8.58433	8.56032	8.53068	8.59734	8.64057	8.5839	8.71701	9.04471	9.00521	8.86144	8.83703	8.97897	8.9715	8.90364	9.19859	8.82924	9.36509	9.12973	8.96	8.90029	9.00755	8.89896	8.69307	9.12384	8.60658	8.846	9.17331	8.81894	8.90534	8.95651	8.60656	8.74929	8.55844	8.60727	8.92231	8.89248	9.02458	9.10802	8.95595	8.90529	8.8753	8.8936	407.137	0.26283
ENSMUSG00000004285	8.88389	8.93743	8.72749	9.01433	8.81521	8.99326	8.43579	8.75106	8.71973	8.5038	8.45833	9.20402	9.06053	9.07673	9.28947	9.03466	9.17649	9.30852	9.37008	9.3276	9.24342	9.41607	9.11154	9.33534	9.20727	9.36092	9.21984	9.328	9.32735	9.2488	9.30114	9.26666	9.4991	9.46981	9.52312	8.8496	8.91477	8.72671	8.56062	9.11376	9.16687	9.3354	9.25701	9.30118	9.29173	9.2722	9.49734	472.832	0.118466
ENSMUSG00000004317	5.14326	5.09966	5.02144	5.12176	5.11027	4.98643	5.05348	5.0928	5.07139	5.04107	5.05136	5.41061	5.55369	5.33338	5.40894	5.60133	5.6077	5.6816	5.67488	5.76223	5.46244	5.86109	5.59458	5.83238	5.6485	5.64788	5.93082	5.64457	5.67814	5.68009	5.8688	5.86233	5.90536	6.03713	6.18017	5.08812	5.11602	5.04424	5.05461	5.43256	5.53932	5.70624	5.63937	5.70959	5.75118	5.80374	6.04089	34.4238	0.131027
ENSMUSG00000004319	10.7483	10.743	10.7455	10.8688	10.7854	10.7254	10.688	10.7332	10.7844	10.6416	10.6591	10.8704	11.0344	11.0351	10.9968	10.9746	11.054	11.2119	11.0523	11.2437	11.1683	11.328	11.2392	11.112	11.0608	11.0344	11.0578	10.8658	11.0089	10.8319	10.9646	11.168	10.7325	10.9446	10.8426	10.7456	10.8271	10.7155	10.6951	10.98	11.0085	11.1693	11.2452	11.0691	10.9775	10.9881	10.8399	1758.42	0.13466
ENSMUSG00000004328	3.12781	3.14513	3.22768	3.18741	3.27462	3.57641	3.71527	3.91491	3.53763	3.57434	3.81522	4.03832	4.13724	4.33976	4.12867	4.26591	4.19057	4.05708	3.75687	3.87631	3.71343	3.74951	3.72323	1.9821	2.02217	1.96768	2.01978	2.10836	2.19363	3.86021	3.7549	3.51565	3.71383	3.68315	3.49428	3.16687	3.23101	3.73553	3.6424	4.17178	4.19505	3.89675	3.72872	1.99065	2.10726	3.71026	3.63042	9.02793	0.872588
ENSMUSG00000004347	4.57998	4.55625	4.49856	4.47625	4.53768	4.76646	4.91973	4.80489	4.88318	4.81789	4.77272	4.58749	4.43545	4.63011	4.5597	4.57289	4.51139	4.91268	4.82631	4.70234	4.90901	4.72457	4.70287	4.62095	4.44982	4.63787	4.68417	4.60908	4.56234	4.26386	4.31011	4.46419	4.61004	4.60331	4.59043	4.54493	4.50697	4.83036	4.8246	4.55102	4.54799	4.81378	4.77882	4.56955	4.61853	4.34605	4.60126	23.15	-0.243769
ENSMUSG00000004356	6.72265	6.74377	6.74585	6.72436	6.76102	6.70209	6.78891	6.73556	6.68668	6.57164	6.78481	7.18876	6.79355	7.02434	7.12484	6.98251	7.04048	7.03723	6.8568	6.72382	7.10215	6.70485	6.73246	6.45569	6.57743	6.33145	6.46824	6.43291	6.22309	6.78854	6.43987	6.76917	6.28485	6.41126	6.50513	6.73742	6.74269	6.74219	6.68104	7.00221	7.04928	6.87262	6.84649	6.45486	6.37475	6.66586	6.40041	106.813	0.0159477
ENSMUSG00000004360	6.62063	6.74702	6.72705	6.7466	6.74407	6.81208	6.64157	6.86655	6.50673	6.41877	6.63519	6.84297	6.73512	7.27318	7.27911	7.11755	6.94376	7.31445	6.63761	6.52664	6.8464	6.57093	6.53352	6.06284	6.37956	6.19679	6.00462	6.01206	6.23927	6.60294	6.30042	6.65011	6.62739	6.25722	5.95581	6.69824	6.74533	6.7734	6.52023	6.95043	7.11348	6.82623	6.65029	6.21307	6.08532	6.51782	6.28014	105.384	0.121052
ENSMUSG00000004364	10.0151	9.88607	9.81354	10.0344	9.8398	10.0924	9.96891	9.97716	10.0989	9.78543	9.82316	10.269	9.97451	10.2384	10.2168	10.1435	10.1636	10.6375	10.2616	10.1548	10.4907	10.0875	10.2316	10.342	10.356	10.2571	10.3425	10.3459	10.2543	10.1613	10.0122	10.1404	9.86274	9.84147	9.63078	9.9049	9.93711	10.0128	9.90249	10.1606	10.1746	10.3513	10.2699	10.3184	10.3143	10.1046	9.77833	972.059	0.0552977
ENSMUSG00000004366	7.11068	7.11402	6.94172	6.87896	6.8372	7.44066	7.70886	7.39457	7.67657	7.6706	7.48293	7.7549	8.20085	7.52281	7.84394	7.84766	7.79804	7.64416	8.09686	8.27902	7.81472	8.36254	8.04089	7.79743	7.47206	7.30582	7.35685	7.33042	7.32921	7.91016	7.82413	7.76453	7.94546	7.9711	8.13821	7.05547	6.85808	7.51469	7.61003	7.82619	7.82988	8.00668	8.07272	7.5251	7.33883	7.83294	8.01826	127.667	-0.508327
ENSMUSG00000004383	7.44862	7.42513	7.27916	7.45696	7.37002	7.52648	7.58795	7.64996	7.67477	7.7348	7.45681	8.36281	8.13047	7.75978	8.13095	8.18657	8.24077	8.28581	8.72991	8.57823	8.67164	8.82654	8.5857	8.69491	8.4746	8.43724	8.59842	8.46024	7.92118	8.72092	8.84063	8.39936	8.37888	8.52563	8.39957	7.3843	7.41349	7.58813	7.62213	8.08435	8.1861	8.53131	8.69463	8.53559	8.32661	8.65364	8.43469	169.162	0.0604684
ENSMUSG00000004393	6.61802	6.56472	6.63846	6.49181	6.60666	6.65986	6.60092	6.62976	6.61788	6.52024	6.81041	6.8228	6.71557	6.83181	6.60607	6.93014	6.71896	6.89305	6.91914	6.91368	6.99479	6.60628	6.92274	6.23952	6.27941	6.27893	6.20388	6.26392	6.39754	6.37062	6.14192	6.29838	6.22072	6.16829	6.41617	6.60707	6.54924	6.63018	6.64951	6.79006	6.75172	6.90862	6.84127	6.26595	6.28844	6.2703	6.2684	96	-0.152801
ENSMUSG00000004394	8.59428	8.67598	8.74388	8.52759	8.73257	8.62252	8.56083	8.68299	8.53772	8.83434	8.72866	8.57847	9.15199	8.99726	8.80808	9.01464	9.06058	8.90687	9.03473	9.22128	8.89554	9.41036	9.29528	8.9466	8.90081	8.89081	8.83586	8.68839	8.89019	9.08346	9.37295	9.25337	9.13606	9.25847	9.38198	8.67138	8.63008	8.62211	8.70024	8.90924	8.9611	9.05429	9.20039	8.91274	8.80481	9.23659	9.25884	404.414	-0.0678491
ENSMUSG00000004446	3.9208	3.97746	3.93811	3.85263	3.89956	4.20179	4.06789	4.15091	4.04779	4.07659	4.14316	4.36029	4.17339	4.08323	4.29546	4.2282	4.22613	4.391	4.51871	4.49186	4.66448	4.42193	4.59492	4.33917	4.08249	4.28081	4.20364	4.30368	4.19001	4.80941	4.81375	4.7823	5.31038	5.21918	4.93518	3.94545	3.8761	4.1402	4.08918	4.20564	4.24993	4.46719	4.56044	4.23416	4.23244	4.80182	5.15492	15.1972	-0.650713
ENSMUSG00000004451	6.69291	6.78786	6.68269	6.63618	6.70711	6.81244	6.87816	6.80588	6.70518	6.837	6.82336	6.72015	6.83484	6.97731	6.74484	6.88024	6.8491	6.73992	6.77917	6.73224	6.5267	6.69889	6.9374	6.29048	6.34553	6.30987	6.22049	6.52591	6.759	6.40492	6.53315	6.42168	6.96019	6.87322	7.06914	6.72115	6.67164	6.83216	6.78851	6.8441	6.82473	6.75044	6.721	6.31529	6.5018	6.45325	6.96752	104.284	-0.129697
ENSMUSG00000004455	NA	NA	NA	NA	NA	NA	NA	NA	NA	NA	NA	1.75519	1.66557	1.77504	1.73042	1.7705	1.67042	2.13815	2.02429	2.13413	2.10448	2.09031	2.15376	NA	NA	NA	NA	NA	NA	NA	NA	NA	NA	NA	NA	NA	NA	NA	NA	1.73194	1.72378	2.09886	2.11618	NA	NA	NA	NA	NA	NA
ENSMUSG00000004460	8.99627	9.02708	9.05194	9.04683	8.98823	9.12893	8.95286	9.08979	9.11017	9.03793	8.9387	9.25647	9.44665	9.35751	9.35751	9.33964	9.4631	9.50301	9.47162	9.67584	9.49205	9.68275	9.62923	9.57744	9.45492	9.36568	9.49538	9.41071	9.47537	9.26425	9.50805	9.44667	9.20572	9.28645	9.39868	9.0251	9.01753	9.05719	9.02893	9.35354	9.38675	9.55016	9.60134	9.46601	9.46049	9.40632	9.29695	520.171	-0.0147117
ENSMUSG00000004462	5.65362	5.61441	5.85761	5.83688	5.79254	5.77325	5.75434	5.78278	5.71818	5.75797	5.69435	5.95171	6.05362	6.0608	6.0443	5.9669	5.85658	5.8148	5.82258	5.72905	5.80575	5.93099	5.95307	5.27831	5.15732	5.48363	5.41893	5.51893	5.52809	5.69471	5.82395	5.81645	5.80804	5.65865	5.81374	5.70855	5.81471	5.77012	5.7235	6.02204	5.95593	5.78881	5.8966	5.30642	5.48865	5.77837	5.76014	54.3086	0.361986
ENSMUSG00000004473	NA	NA	NA	NA	NA	2.27876	2.22076	2.18341	2.21057	2.274	2.24877	2.01982	1.97936	1.90416	1.9482	2.04392	2.0053	NA	NA	NA	NA	NA	NA	NA	NA	NA	NA	NA	NA	2.10999	2.06549	2.12099	2.00922	2.11782	2.12262	NA	NA	2.22764	2.24445	1.96778	1.99914	NA	NA	NA	NA	2.09882	2.08322	NA	NA
ENSMUSG00000004500	3.62708	3.64758	3.68283	3.65294	3.66646	3.364	3.35373	3.41837	3.3766	3.33168	3.42076	3.55802	3.45228	3.37619	3.43634	3.56239	3.43819	3.68727	3.93129	3.85984	3.98014	3.80348	3.86368	3.04928	3.1319	3.3012	3.10829	3.18124	3.00966	3.30333	3.33328	3.18464	2.90638	3.08629	3.2416	3.6525	3.6597	3.3787	3.37635	3.46217	3.47897	3.82613	3.88244	3.16079	3.09973	3.27375	3.07809	12.5642	0.073852
ENSMUSG00000004508	6.45321	6.25781	6.40325	6.48508	6.59949	6.60189	6.60318	6.69585	6.68415	6.63388	6.86502	6.48049	6.5454	6.77866	6.53424	6.5711	6.53235	6.48586	6.38228	6.42171	6.36707	6.48583	6.6604	5.60596	5.64083	5.70808	5.78366	5.74229	5.91976	6.22447	6.25109	6.28341	6.36122	6.40261	6.34738	6.37142	6.54229	6.63364	6.72768	6.60152	6.5459	6.42995	6.50443	5.65162	5.81524	6.25299	6.3704	87.4436	0.483817
ENSMUSG00000004530	6.68859	6.65775	6.65024	6.65556	6.55641	6.77621	7.08782	6.90965	6.88262	6.95672	6.98979	7.06815	6.85864	6.80606	6.77119	7.06119	6.89113	7.13694	7.08393	7.02103	7.12454	6.94161	7.16224	6.53994	6.69607	6.61725	6.57793	6.77666	6.56626	7.00607	6.913	6.73296	7.52515	7.42766	7.32838	6.66553	6.60598	6.92456	6.94305	6.91095	6.90784	7.08063	7.07613	6.61775	6.64028	6.88401	7.42706	100.233	-0.16519
ENSMUSG00000004535	9.97771	9.95888	9.88883	10.0313	9.81347	10.1369	9.93846	9.93263	10.0339	9.73266	9.86437	10.2208	9.84918	10.126	10.3485	10.0807	10.075	11.1871	10.4731	10.4327	11.0127	10.2871	10.491	10.036	10.1245	10.0497	10.1834	10.0715	10.2057	10.0322	9.88151	9.91658	9.93445	9.80647	9.75212	9.9418	9.92238	10.0027	9.87697	10.0653	10.1681	10.6976	10.5969	10.0701	10.1535	9.94343	9.83101	981.711	-0.0264186
ENSMUSG00000004558	15.176	15.1933	15.6001	15.2522	15.3705	15.2443	15.3462	15.2887	15.3221	15.2271	15.507	15.1638	15.3658	15.5432	15.152	15.3629	15.3032	15.3572	15.2248	15.1944	15.1308	15.0609	15.2848	14.2197	14.4852	14.3056	14.2076	14.3576	14.6171	14.5536	14.2856	14.776	14.3611	14.1837	14.2128	15.3231	15.3114	15.2931	15.3521	15.3576	15.2727	15.2588	15.1588	14.3368	14.3941	14.5384	14.2525	41404.2	-0.045791
ENSMUSG00000004561	4.52131	4.64012	4.52915	4.4998	4.52923	4.26163	4.28663	4.38299	4.24405	4.27793	4.23673	4.50409	4.31252	4.58444	4.5524	4.27846	4.42888	4.72756	4.69005	4.46039	4.59792	4.28561	4.42101	3.71604	3.81785	3.55017	3.85444	3.69867	3.62675	4.23775	4.32012	4.22512	4.0191	4.09417	4.05265	4.56353	4.51452	4.31042	4.2529	4.46702	4.41992	4.626	4.43484	3.69469	3.72662	4.261	4.05531	23.5048	-0.324681
ENSMUSG00000004562	7.53331	7.44999	7.68452	7.39676	7.64476	7.46993	7.76419	7.589	7.41472	7.59579	7.8734	7.54423	7.62979	7.64291	7.53363	7.51525	7.3193	7.59186	7.50555	7.48558	7.63245	7.16675	7.50904	6.29521	6.5073	6.27934	6.36125	6.6173	6.94268	6.55747	6.4453	6.82154	6.42664	6.29457	6.73314	7.55594	7.52076	7.60771	7.62797	7.60564	7.45606	7.52767	7.43608	6.36062	6.64041	6.6081	6.48478	187.495	-0.0671265
ENSMUSG00000004565	7.68484	7.80619	7.78156	7.75299	7.9407	7.81179	7.77114	7.71613	7.76854	7.88108	7.82039	7.98205	8.26565	8.16038	8.18537	8.18076	8.22517	8.0399	8.10682	8.31399	8.01604	8.44411	8.27212	8.10411	7.91642	7.87661	7.95156	7.89512	7.99407	7.89164	7.9381	8.11302	7.85591	8.09925	8.43318	7.75753	7.84685	7.76635	7.82333	8.13603	8.1971	8.15357	8.24409	7.96571	7.94691	7.98092	8.12945	222.571	0.196678
ENSMUSG00000004567	7.73514	7.79089	7.77952	7.76417	7.81997	7.84747	8.05183	7.95255	7.867	8.02774	7.89652	8.16223	8.45012	8.17367	8.27504	8.30121	8.3574	8.36588	8.55355	8.78553	8.35428	8.89117	8.65818	8.46594	8.32471	8.35845	8.48088	8.19221	8.1155	8.38406	8.69651	8.62042	8.17976	8.5559	8.64903	7.76851	7.79207	7.95062	7.93042	8.26201	8.31121	8.56832	8.63455	8.38303	8.26286	8.567	8.46156	219.497	0.0515651
ENSMUSG00000004568	7.43239	7.36477	7.67086	7.46985	7.58873	7.7033	7.78957	7.69725	7.8289	7.73989	7.8035	7.77899	7.72369	7.73562	7.76675	7.85374	7.58923	7.90627	7.82208	7.84199	7.84219	7.67263	7.87667	6.94044	7.12646	7.0184	6.99168	6.98668	7.11559	7.35493	7.40374	7.38558	6.89376	7.07288	7.02226	7.48934	7.52929	7.73004	7.79076	7.7461	7.73657	7.85678	7.79716	7.02843	7.03132	7.38142	6.9963	182.905	0.0735026
ENSMUSG00000004591	8.27942	8.25761	8.27293	8.36176	8.36245	8.30142	8.08365	8.24962	8.19083	8.09476	8.18689	8.33632	8.33664	8.56403	8.54407	8.41018	8.42462	8.80009	8.38313	8.42804	8.63764	8.35472	8.45188	8.06636	8.26108	8.08507	8.09316	8.2594	8.28819	7.92049	7.82601	8.10774	7.86547	7.77396	7.67274	8.26999	8.3621	8.21157	8.15749	8.41233	8.45962	8.53708	8.48141	8.1375	8.21359	7.95141	7.77072	317.01	0.178271
ENSMUSG00000004610	6.59948	6.77172	6.96016	6.81838	6.81668	6.69035	6.8649	6.59909	6.77737	6.92061	7.00035	6.6958	6.87378	6.99017	6.46867	6.7502	6.83996	6.60686	6.65033	6.62752	6.72029	6.5897	6.63071	5.44208	5.76367	5.31827	5.52483	5.73322	5.80025	6.04515	5.90426	6.23585	5.89052	6.01351	6.0841	6.77712	6.81753	6.71811	6.89945	6.85325	6.68628	6.62823	6.6469	5.50801	5.6861	6.06175	5.99604	111.999	0.0762203
ENSMUSG00000004626	2.23752	2.37073	2.24538	2.29661	2.25984	2.55428	2.66051	2.51509	2.50485	2.5488	2.49624	3.00405	2.86538	2.85805	2.97796	2.89403	2.85899	2.75618	2.92571	2.81264	2.95933	2.86177	2.8237	2.52723	2.57151	2.42932	2.54817	2.5285	2.4825	3.17934	3.12508	3.13531	3.34055	3.30677	3.28268	2.28454	2.27822	2.57663	2.51663	2.90916	2.91032	2.83151	2.8816	2.50935	2.51972	3.14658	3.31	5.08429	-0.197019
ENSMUSG00000004630	5.2769	5.3803	5.26712	5.34927	5.35201	5.26282	5.22912	5.28209	5.24811	5.33412	5.43716	5.42357	5.81494	5.58362	5.61019	5.64998	5.59671	5.28798	5.73879	5.67471	5.38319	5.725	5.63881	4.40817	4.48588	4.37004	4.43546	4.40691	4.57562	4.69474	4.74707	4.60457	4.70947	4.76191	4.6154	5.30811	5.35064	5.25801	5.3398	5.60738	5.61896	5.56716	5.58234	4.42136	4.47266	4.68213	4.69559	40.2273	0.1834
ENSMUSG00000004631	8.69184	8.72599	8.64525	8.89105	8.73953	8.67701	8.41585	8.6111	8.55081	8.5077	8.51682	8.93164	8.96562	8.9413	9.15455	8.94447	9.01725	9.15611	9.05182	9.14131	9.0362	9.39936	9.16821	9.28223	9.30965	9.19112	9.2879	9.26436	9.19646	9.00327	9.19584	9.31612	9.2513	9.30749	9.38225	8.6877	8.81529	8.56799	8.52511	8.94619	9.03876	9.11641	9.20126	9.261	9.24957	9.17174	9.31368	429.177	0.236605
ENSMUSG00000004633	5.71165	5.59384	5.54261	5.59986	5.62512	6.03077	5.95827	5.9378	5.92422	6.02222	5.88416	6.11816	5.99246	6.0176	6.21365	6.08567	6.09971	6.26171	6.51885	6.40186	6.34043	6.34187	6.26971	6.1542	5.92674	6.08225	6.09547	6.01547	6.09677	6.10158	5.94719	6.05649	6.59377	6.6559	6.41961	5.61604	5.61249	5.97561	5.94353	6.04274	6.13301	6.39414	6.31734	6.0544	6.06924	6.03509	6.55642	49.2051	-0.020464
ENSMUSG00000004637	6.37021	6.50154	6.44207	6.47826	6.40563	6.61354	6.71699	6.51292	6.74808	6.64762	6.70111	6.61734	6.69257	6.73485	6.56403	6.56692	6.65098	6.94714	6.74489	6.78761	6.80546	6.59587	6.79386	6.09208	6.26196	6.181	6.10248	6.30247	6.25553	6.19392	6.45819	6.51874	6.78275	6.74396	6.77314	6.43794	6.44195	6.61448	6.69894	6.68159	6.59398	6.82655	6.73173	6.17835	6.22016	6.39028	6.76662	87.1094	0.0065229
ENSMUSG00000004642	6.83755	6.7416	6.74853	6.73445	6.61821	6.88136	6.81671	6.80518	6.83481	6.74159	6.8085	7.01011	6.9131	7.06626	7.0742	6.99454	6.95859	7.35013	7.14878	7.03835	7.27822	7.03293	7.16592	6.63946	6.67459	6.67312	6.81399	6.72622	6.78403	6.77225	6.62178	6.66301	6.60895	6.42035	6.56752	6.77589	6.67633	6.83442	6.79497	6.99649	7.00911	7.17908	7.15902	6.66239	6.77475	6.68568	6.53227	107.312	-0.269756
ENSMUSG00000004655	2.19634	2.30346	2.26317	2.24047	2.25736	2.17234	2.20444	2.12286	2.11579	2.16436	2.17646	2.24827	2.22822	2.3227	2.22135	2.25574	2.34472	2.43076	2.41895	2.43092	2.48263	2.46222	2.36431	2.01992	1.85022	2.00309	1.82528	1.89387	1.87698	NA	NA	NA	NA	NA	NA	2.25432	2.24892	2.16655	2.1522	2.2664	2.27394	2.42687	2.43639	1.95774	1.86538	NA	NA	4.8051	-0.160618
ENSMUSG00000004661	NA	NA	NA	NA	NA	NA	NA	NA	NA	NA	NA	NA	NA	NA	NA	NA	NA	NA	NA	NA	NA	NA	NA	NA	NA	NA	NA	NA	NA	2.17737	2.27139	2.22088	2.17622	2.25122	2.34028	NA	NA	NA	NA	NA	NA	NA	NA	NA	NA	2.22321	2.25591	NA	NA
ENSMUSG00000004665	6.31271	6.2814	6.53308	6.16446	6.57797	5.98117	5.76937	6.16149	5.95146	6.04352	6.28283	6.1777	6.05923	6.61058	6.09879	6.15496	6.23793	5.45819	5.70613	5.8158	5.61602	5.71812	5.77402	4.87313	4.96344	5.1803	5.06863	4.91541	5.1949	5.02762	4.95903	4.90218	5.34115	5.35198	5.51628	6.37573	6.37121	5.97068	6.0926	6.2825	6.16389	5.66004	5.70272	5.00563	5.05964	4.96294	5.40313	84.158	0.0285791
ENSMUSG00000004667	8.0287	8.14829	8.05967	8.0037	7.96598	8.15777	8.24938	8.12535	8.06114	8.35537	8.25119	8.27391	8.40567	8.26762	8.2071	8.26081	8.28359	8.3247	8.45821	8.47428	8.32395	8.37949	8.6018	7.88705	7.96541	7.92812	7.90901	7.90322	8.21634	8.05958	8.0733	7.939	8.02356	7.98641	7.97133	8.07888	7.98484	8.1775	8.22256	8.31574	8.2505	8.41906	8.43508	7.92686	8.00952	8.02396	7.99377	264.278	-0.192972
ENSMUSG00000004668	2.75173	2.76814	2.8342	2.83626	2.8392	2.7212	2.59962	2.54357	2.63346	2.65266	2.67796	2.79176	2.77459	2.76481	2.7871	2.79474	2.80566	2.81765	2.97831	2.82436	2.89691	2.92053	2.78188	3.00732	2.98631	2.95697	2.98164	2.98149	2.85837	3.46216	3.42478	3.45555	3.45935	3.5054	3.55117	2.78469	2.83773	2.62147	2.65469	2.77705	2.79584	2.87344	2.86644	2.98353	2.9405	3.44749	3.50531	6.95921	0.915008
ENSMUSG00000004677	6.78677	6.81412	6.76948	6.91622	6.87892	6.64382	6.73485	6.60134	6.59696	6.63791	6.8386	6.76124	6.84035	6.88546	6.78393	6.80059	6.85729	6.72232	6.81439	6.81665	6.63261	6.87336	6.88716	6.43621	6.52749	6.56019	6.35771	6.59981	6.74646	6.43638	6.23532	6.69882	6.76638	6.82151	6.97408	6.79012	6.89757	6.66	6.69116	6.82902	6.81394	6.78445	6.79771	6.50796	6.56799	6.45684	6.85399	114.314	0.274851
ENSMUSG00000004698	6.76223	6.78645	6.70485	6.59651	6.55703	6.94176	7.04682	7.01688	6.92899	7.08332	6.67878	7.47163	7.31099	7.05699	7.51922	7.3367	7.27827	7.7613	7.73112	7.46193	7.81788	7.54374	7.51722	7.64472	7.5195	7.3419	7.59946	7.44503	7.22572	7.30145	7.29457	7.05778	6.77343	6.83672	6.51136	6.75118	6.57677	7.00182	6.89703	7.27987	7.37806	7.65145	7.62628	7.50204	7.4234	7.21793	6.70717	103.627	-0.479448
ENSMUSG00000004707	NA	NA	NA	NA	NA	NA	NA	NA	NA	NA	NA	NA	NA	NA	NA	NA	NA	NA	NA	NA	NA	NA	NA	NA	NA	NA	NA	NA	NA	2.48574	2.47341	2.38496	2.73132	2.85715	2.6215	NA	NA	NA	NA	NA	NA	NA	NA	NA	NA	2.44803	2.73666	NA	NA
ENSMUSG00000004730	NA	NA	NA	NA	NA	3.12564	3.08249	3.04107	3.00319	3.12913	3.09296	2.49473	2.47812	2.36885	2.44416	2.37946	2.34842	2.60265	2.54188	2.53203	2.49974	2.48436	2.5986	2.75136	2.79709	2.75501	2.81216	2.88537	2.73644	3.90703	3.8372	3.96085	4.35794	4.28246	4.57871	NA	NA	3.08307	3.07509	2.44723	2.39068	2.55886	2.52756	2.76782	2.81133	3.90169	4.40637	NA	NA
ENSMUSG00000004748	7.29764	7.29046	7.24825	7.1278	7.22076	7.31777	7.28151	7.40038	7.35287	7.59698	7.28805	7.58836	7.67256	7.64445	7.49061	7.61117	7.53166	7.61943	7.81547	7.88478	7.7772	7.89549	7.74329	7.24563	7.12798	7.0518	7.08611	7.21147	6.91251	7.86627	7.73158	7.67705	7.3501	7.31394	7.45196	7.27878	7.17428	7.33322	7.41264	7.63512	7.54448	7.77323	7.80533	7.1418	7.07003	7.7583	7.372	151.258	-0.239252
ENSMUSG00000004768	7.47325	7.37833	7.30078	7.49226	7.34783	7.45074	7.40005	7.35981	7.5126	7.24719	7.32425	7.61642	7.61707	7.73123	7.75145	7.58095	7.5593	7.82446	7.598	7.58574	7.64412	7.46128	7.73	7.08554	7.17127	7.08046	6.98249	7.19227	7.25571	7.2851	7.21447	7.36083	7.54963	7.42977	7.37621	7.38412	7.42005	7.40354	7.36135	7.65491	7.63057	7.6694	7.6118	7.11242	7.14349	7.2868	7.45187	169.644	0.0778658
ENSMUSG00000004771	9.81336	9.65323	9.55023	9.81185	9.55738	9.81385	9.51553	9.70074	9.64268	9.37352	9.35075	9.9928	9.63426	9.85919	9.97984	9.9351	9.8564	10.1067	10.1282	10.0509	10.0568	9.9486	9.98757	9.77568	9.83324	9.86397	9.76711	9.85417	9.72432	9.82554	9.8224	9.80076	9.9926	9.74058	9.7547	9.67227	9.68462	9.67671	9.45565	9.82875	9.92378	10.0953	9.99766	9.82429	9.78187	9.81623	9.82929	825.497	0.0232764
ENSMUSG00000004788	7.10807	7.19899	7.27503	7.15965	7.21754	7.09544	7.26418	7.22336	7.11765	7.1712	7.41678	7.37145	7.44054	7.65839	7.08673	7.47138	7.297	7.14682	7.32819	7.20731	7.14794	7.00753	7.15983	6.37358	6.34726	6.31593	6.31933	6.48125	6.48833	6.8959	6.65149	6.99231	7.04886	6.8238	7.00155	7.19403	7.1886	7.19433	7.23521	7.49013	7.28504	7.22744	7.1051	6.34559	6.42964	6.84657	6.95807	146.421	-0.0160122
ENSMUSG00000004789	8.97922	8.96002	9.08721	9.1389	9.02719	8.99163	8.95529	8.98893	9.02874	8.89634	9.08085	9.06385	8.98884	9.16876	9.09552	9.09719	9.04372	9.53745	9.32123	9.33778	9.54807	9.12513	9.27633	8.61823	8.64616	8.71801	8.70185	8.69663	8.83788	8.77364	8.72226	8.69218	8.4678	8.44561	8.52213	9.00882	9.08304	8.97862	9.00198	9.07382	9.07881	9.39882	9.31651	8.6608	8.74545	8.72936	8.47851	527.273	0.130882
ENSMUSG00000004791	5.43282	5.52575	5.47733	5.39533	5.4569	5.6062	5.48059	5.50787	5.56053	5.62605	5.47981	5.57845	5.95588	5.91362	5.90234	5.83432	5.93498	5.67944	5.6385	5.77108	5.45583	5.86427	6.06279	5.39772	5.15726	5.33798	5.07355	5.21431	5.54349	5.59979	5.64607	5.43785	5.77129	5.81675	5.88814	5.47863	5.42612	5.53155	5.55546	5.81598	5.89055	5.69634	5.7943	5.29765	5.27712	5.56123	5.82539	44.0336	-0.217265
ENSMUSG00000004798	7.81488	7.80267	7.68741	7.82856	7.7658	7.94192	7.73897	7.68116	7.7365	7.70099	7.54368	8.01448	7.90461	7.94351	8.08263	8.011	7.98434	8.14748	8.13564	8.17421	8.05325	8.19411	7.97309	8.25225	8.1128	8.07793	8.09437	8.14285	8.11772	7.6934	7.77517	8.17964	8.02842	8.18657	8.13039	7.76832	7.79718	7.78735	7.66039	7.9542	8.02599	8.15244	8.07348	8.14766	8.11832	7.88274	8.11513	220.302	0.0573917
ENSMUSG00000004815	4.52393	4.48508	4.55643	4.51591	4.53173	4.61385	4.83499	4.78811	4.79116	4.73044	4.84876	5.23712	5.0243	4.94663	4.93449	5.18538	4.95429	5.09336	5.23455	5.21251	5.21867	5.21247	5.39505	4.54238	4.57261	4.56741	4.56318	4.50845	4.64341	4.80723	4.76434	4.72966	4.66627	4.56557	4.76092	4.52181	4.52382	4.74565	4.79012	5.06935	5.02472	5.18014	5.2754	4.5608	4.57168	4.76708	4.66425	22.9444	0.0104264
ENSMUSG00000004843	8.36248	8.29609	8.10044	8.30077	8.04704	8.44012	8.16277	8.18224	8.46238	8.14276	8.1046	8.64985	8.48436	8.53894	8.76669	8.44141	8.64079	8.98329	8.69743	8.5892	8.76312	8.60388	8.68154	8.66781	8.71948	8.63293	8.65048	8.75278	8.62619	8.58889	8.50279	8.61368	8.57627	8.60556	8.43532	8.253	8.17391	8.26171	8.23658	8.55772	8.6163	8.75664	8.68284	8.67341	8.67648	8.56845	8.53905	301.952	-0.154774
ENSMUSG00000004846	8.45068	8.49019	8.42683	8.42893	8.62316	8.49331	8.38957	8.3883	8.41863	8.60765	8.58617	8.65228	9.14332	8.84276	8.73178	8.79132	8.90023	8.80053	8.85283	9.13634	8.80001	9.39546	9.12321	8.92934	8.85594	8.77521	8.92176	8.8945	9.00415	8.942	9.08107	9.14964	9.11207	9.24043	9.49895	8.4559	8.52605	8.42373	8.53748	8.87945	8.80778	8.9299	9.10622	8.8535	8.94013	9.05757	9.28381	358.953	0.144804
ENSMUSG00000004849	8.30531	8.1969	8.0973	8.18051	8.08518	8.43696	8.4044	8.36339	8.52876	8.46903	8.18776	8.92968	8.76875	8.53078	8.74868	8.7919	8.82609	9.08828	9.27799	9.10505	9.30952	9.21848	9.0744	8.9869	8.86749	8.98978	8.98523	8.95557	8.71518	9.16223	9.18696	8.9843	9.44234	9.40404	9.32815	8.19984	8.13285	8.40158	8.39518	8.74307	8.78889	9.15711	9.2008	8.94806	8.88532	9.11116	9.39151	290.095	-0.138877
ENSMUSG00000004864	NA	NA	NA	NA	NA	NA	NA	NA	NA	NA	NA	NA	NA	NA	NA	NA	NA	NA	NA	NA	NA	NA	NA	NA	NA	NA	NA	NA	NA	1.73767	1.67496	1.70735	1.92989	1.91045	1.79154	NA	NA	NA	NA	NA	NA	NA	NA	NA	NA	1.70666	1.87729	NA	NA
ENSMUSG00000004865	6.33083	6.37144	6.37941	6.42567	6.29698	6.54053	6.52937	6.67061	6.42691	6.50903	6.53077	6.88072	6.61017	6.78119	6.78301	6.75469	6.65966	7.0655	7.15001	6.71088	7.15538	6.74027	6.89049	6.6123	6.45601	6.67428	6.64289	6.86893	6.75597	6.67456	6.70432	6.34108	6.28485	6.43072	6.43183	6.36056	6.36132	6.58017	6.4889	6.75736	6.73246	6.97546	6.92871	6.58086	6.75593	6.57332	6.38247	82.5239	0.000830193
ENSMUSG00000004872	5.40441	5.44487	5.50547	5.67601	5.54163	5.52069	5.38818	5.52761	5.61227	5.38738	5.65645	5.33242	5.48776	5.48491	5.18647	5.41213	5.35295	5.52754	5.44678	5.31325	5.20827	5.34955	5.54726	4.24671	4.16298	4.3298	4.50045	4.15587	4.52687	4.73089	4.7695	4.96754	4.47557	4.43151	4.35782	5.45159	5.60882	5.47883	5.55203	5.43503	5.31718	5.42919	5.36836	4.2465	4.39439	4.82264	4.42163	46.283	0.625383
ENSMUSG00000004880	5.25884	5.18894	5.2435	5.16063	5.26304	5.49307	5.40275	5.37684	5.41823	5.48801	5.43651	5.53764	5.67667	5.69439	5.63841	5.63654	5.60944	5.58316	5.35672	5.52022	5.64007	5.72481	5.45502	5.35037	5.33683	5.22609	5.42686	5.1887	5.15472	5.44347	5.3574	5.21895	5.05763	5.16957	5.43209	5.23043	5.21183	5.42422	5.44758	5.63623	5.62813	5.4867	5.60663	5.30443	5.25676	5.33994	5.21977	37.2792	-0.0763662
ENSMUSG00000004891	4.53844	4.54439	4.46754	4.54327	4.48509	4.34011	4.36593	4.34577	4.37547	4.45606	4.37866	4.71701	4.80331	4.79592	4.95161	4.70822	4.90076	4.31692	4.34399	4.65182	4.4258	4.51713	4.66586	4.3478	4.4493	4.39387	4.33791	4.74147	4.45171	5.41492	5.61556	5.35566	6.76291	6.81294	6.86945	4.51679	4.51418	4.3506	4.4034	4.77208	4.85353	4.43758	4.53626	4.39699	4.51036	5.46204	6.8151	23.066	-0.0214463
ENSMUSG00000004892	13.3997	13.5134	13.604	13.5181	13.6341	13.3694	13.5258	13.3839	13.3808	13.6932	13.6412	13.5058	13.985	13.8226	13.5872	13.6184	13.8479	13.701	13.6957	13.9409	13.6324	14.1361	13.9915	13.4698	13.4189	13.5882	13.4544	12.9151	13.6057	13.4016	13.6888	13.7299	12.5991	12.7923	12.9098	13.5057	13.5761	13.4264	13.5717	13.7711	13.6845	13.7792	13.92	13.4923	13.325	13.6068	12.767	11901.3	0.109156
ENSMUSG00000004894	3.30749	3.43531	3.37341	3.32892	3.41785	3.00475	2.91921	3.03029	3.01319	2.9526	2.9652	2.89563	3.00194	2.88857	2.93928	2.8835	2.9288	3.31195	3.38831	3.6059	3.41762	3.62338	3.54285	2.75803	2.74313	2.81123	2.89338	2.79987	2.77935	3.49866	3.7076	3.7893	4.18151	3.69778	3.93253	3.37207	3.37339	2.98475	2.977	2.92871	2.91719	3.43538	3.52795	2.77079	2.8242	3.66519	3.93727	10.3549	0.0160785
ENSMUSG00000004895	5.93889	6.03698	5.95198	6.10035	6.07537	6.12248	6.32081	6.14796	6.22219	6.33217	6.42667	6.58614	6.66855	6.60048	6.54183	6.57803	6.53949	6.35328	6.49785	6.45579	6.51877	6.46396	6.48515	5.53332	5.5083	5.62654	5.55187	5.54233	5.5368	6.36336	6.31632	6.28755	6.35553	6.2369	6.36917	5.97595	6.08786	6.19708	6.32701	6.61839	6.55312	6.43564	6.48929	5.55605	5.54366	6.32241	6.32053	65.2117	0.366412
ENSMUSG00000004896	4.55774	4.63547	4.56313	4.50415	4.55142	4.58188	4.61449	4.60411	4.63261	4.63166	4.59442	4.85592	4.82452	4.86121	4.69696	4.88121	4.80756	4.45739	4.82353	4.64164	4.56673	4.57061	4.56344	3.71624	3.70333	3.5847	3.68024	3.69636	3.62202	4.48037	4.56892	4.37952	4.49656	4.32157	4.46426	4.58545	4.52778	4.60016	4.61956	4.84722	4.79524	4.64085	4.56693	3.66809	3.66621	4.47627	4.42746	23.733	-0.372411
ENSMUSG00000004897	8.30253	8.38696	8.35277	8.26464	8.25035	8.31578	8.23744	8.26663	8.26999	8.36173	8.40295	8.33272	8.61036	8.56405	8.23401	8.45953	8.50715	8.64005	8.49399	8.56595	8.55137	8.60991	8.67086	8.10283	8.07812	7.95712	7.9632	7.97764	8.23112	8.32308	8.43669	8.60725	8.69244	8.64015	8.47178	8.34742	8.25749	8.27328	8.34489	8.50238	8.40023	8.56666	8.61071	8.04603	8.05732	8.45567	8.60146	318.34	-0.176605
ENSMUSG00000004902	11.1505	11.1284	11.3303	11.1379	11.2886	11.1671	11.3972	11.1042	11.2862	11.313	11.4846	11.1401	11.3356	11.3996	11.1275	11.2646	11.1484	11.2657	11.0628	11.1584	11.0441	10.999	11.2631	10.0796	10.2959	10.3088	9.99953	10.4569	10.704	10.3954	10.2487	10.6882	10.7591	10.6738	10.6598	11.2031	11.2132	11.2228	11.3613	11.2917	11.1801	11.1623	11.1021	10.2281	10.3868	10.4441	10.6976	2373.07	0.014827
ENSMUSG00000004929	6.46123	6.36943	6.57963	6.47275	6.42347	6.56558	6.92605	6.93902	6.76417	6.92675	6.91856	6.83513	6.70651	6.8082	6.77531	6.8623	6.76478	7.19222	7.2428	7.08548	7.07908	6.78322	7.07816	5.96524	6.01115	6.02073	6.04922	6.10525	6.18169	6.5484	6.36784	6.1664	6.20271	5.97082	6.10691	6.4701	6.44811	6.81022	6.86982	6.78328	6.80079	7.1735	6.98015	5.99904	6.11205	6.36088	6.09348	88.4833	-0.076761
ENSMUSG00000004931	5.7064	5.72383	5.84228	5.79042	5.76368	5.61668	5.76891	5.59088	5.736	5.95182	5.76634	5.84501	5.94103	5.9839	5.87015	5.91353	5.86856	5.94542	5.96687	6.15829	5.82561	6.07414	6.19046	5.14761	5.15736	5.18504	5.13492	5.17864	5.39089	5.63288	5.58268	5.71323	5.4906	5.89464	5.89082	5.7575	5.77705	5.65882	5.81805	5.92331	5.88408	6.02352	6.03007	5.16334	5.23482	5.64293	5.75869	54.4933	0.0619791
ENSMUSG00000004933	4.5138	4.46032	4.3838	4.35545	4.37423	5.10929	5.3502	5.16007	5.17809	5.17916	4.93293	5.68776	5.51091	5.065	5.35076	5.45599	5.37415	5.67063	6.00092	5.9316	6.05071	5.90336	5.97596	5.11646	5.04369	5.06608	5.08767	5.12927	4.83006	5.64534	5.67352	5.24194	5.55574	5.3766	5.69828	4.45264	4.36484	5.20652	5.09673	5.42122	5.39363	5.86772	5.97667	5.07541	5.01567	5.52027	5.54354	21.6472	-0.632201
ENSMUSG00000004934	5.4792	5.51212	5.54362	5.49047	5.50965	5.49701	5.65863	5.55215	5.45024	5.5063	5.64757	5.91521	5.72133	5.9148	5.63949	5.73606	5.64403	5.66024	5.78743	5.64277	5.71696	5.53777	5.66727	4.88946	4.94103	4.83926	4.99642	4.88313	4.82022	5.24917	5.46407	5.13367	5.25958	5.10205	5.35464	5.51165	5.50006	5.56926	5.5347	5.85045	5.67319	5.69681	5.64066	4.88992	4.89992	5.28231	5.23876	45.4619	-0.0480573
ENSMUSG00000004936	9.43061	9.51423	9.28446	9.22342	9.25472	9.5524	9.53206	9.4962	9.46997	9.4691	9.41495	9.80142	9.46895	9.47453	9.55431	9.65276	9.51602	9.80602	9.95681	9.80556	9.9481	9.64641	9.74114	9.41632	9.28803	9.32235	9.3004	9.32647	9.3324	9.54405	9.37335	9.2501	9.33181	9.29387	9.04387	9.40977	9.23907	9.52689	9.45134	9.58163	9.57436	9.85613	9.77855	9.34223	9.31976	9.38917	9.22318	653.732	-0.307164
ENSMUSG00000004937	8.50588	8.49843	8.73617	8.48596	8.67136	8.61694	8.82434	8.69257	8.6384	8.76368	8.85402	8.78456	8.90264	8.85348	8.78271	8.78813	8.8279	8.74128	8.85326	8.80022	8.74807	8.59579	8.88787	7.99438	7.93492	7.97659	7.88804	7.9592	8.15661	8.31043	8.20252	8.25425	8.17296	8.13206	8.47912	8.58016	8.57866	8.71128	8.75203	8.84689	8.79958	8.79825	8.74391	7.96863	8.00128	8.25573	8.26138	384.717	-0.00466947
ENSMUSG00000004945	7.37706	7.35133	7.5715	7.31049	7.38454	7.10696	6.90046	6.99482	6.95242	6.99798	7.21084	7.6041	7.67581	7.59795	7.67851	7.47225	7.54556	7.64134	7.54391	7.65979	7.55056	7.88784	7.61162	7.35033	7.47798	7.20532	7.2912	7.42367	7.21965	7.40563	7.53731	7.6295	7.52281	7.551	7.60988	7.4333	7.34751	7.00075	7.05375	7.62595	7.56544	7.61501	7.68334	7.34454	7.31151	7.52415	7.56123	169.649	-0.202664
ENSMUSG00000004947	4.06081	4.19577	4.10138	4.12551	4.08554	4.2289	4.19187	4.25422	4.22795	4.23011	4.32045	4.08411	4.16327	4.24636	4.22469	4.26615	4.17626	4.42621	4.42474	4.41575	4.34986	4.29074	4.40213	3.64607	3.46242	3.58884	3.68187	3.62992	3.87588	3.92601	3.88184	3.97904	4.12861	3.83885	3.95278	4.11932	4.10553	4.225	4.2595	4.16458	4.22237	4.42223	4.34758	3.56578	3.72922	3.92896	3.97341	17.5289	-0.125041
ENSMUSG00000004951	NA	NA	NA	NA	NA	NA	NA	NA	NA	NA	NA	NA	NA	NA	NA	NA	NA	1.67329	1.69665	1.76971	1.64978	1.87037	1.85488	2.00466	2.10324	2.04674	1.99797	2.26054	2.42565	4.63215	4.9227	4.76906	7.50726	7.12567	6.89296	NA	NA	NA	NA	NA	NA	1.71322	1.79168	2.05155	2.22806	4.77464	7.1753	NA	NA
ENSMUSG00000004952	3.13646	3.10365	3.18886	3.17163	3.20921	3.51112	3.74599	3.54453	3.51585	3.6451	3.62662	3.33514	3.39851	3.3365	3.2657	3.4351	3.42382	3.23753	3.26306	3.30033	3.27259	3.313	3.28417	2.43283	2.39808	2.40468	2.49993	2.51951	2.50373	3.44468	3.3585	3.36857	3.52862	3.65737	4.04139	3.14299	3.19042	3.60055	3.59586	3.35672	3.37487	3.26697	3.28992	2.41186	2.50773	3.39058	3.74246	8.86449	0.658903
ENSMUSG00000004961	7.5779	7.64263	7.17663	7.11739	6.9754	7.92534	8.16735	7.99876	8.1381	8.11808	7.4756	8.72933	8.22027	7.54461	8.51831	8.43444	8.43513	8.88104	9.24926	9.29962	9.36898	9.37958	9.07973	9.39643	9.14939	9.10426	9.38052	9.11645	8.64693	9.31997	9.54771	8.96395	9.1037	9.33071	9.38402	7.46572	7.0464	8.03049	7.9106	8.16474	8.46263	9.14331	9.2761	9.21669	9.04797	9.27721	9.27281	166.62	-1.02801
ENSMUSG00000004980	11.176	10.9857	11.067	11.1653	10.9181	11.2435	10.9958	11.0208	11.2097	10.8309	11.0219	11.2962	11.1049	11.3356	11.4351	11.1653	11.2106	11.951	11.2678	11.2557	11.6998	11.1149	11.3702	11.0262	11.1303	11.0372	11.0835	11.1308	11.089	10.8756	10.7307	10.8411	10.465	10.3923	10.4942	11.0762	11.0417	11.0867	11.0208	11.2456	11.2703	11.4915	11.395	11.0646	11.1011	10.8158	10.4505	2150.4	-0.0502725
ENSMUSG00000004994	4.82862	4.94633	4.96929	4.89732	4.85244	5.09075	5.08655	5.18408	4.98163	5.18303	5.23138	5.45556	5.33472	5.36876	5.43727	5.46051	5.4336	5.44147	5.27743	5.14805	5.50974	5.20471	5.2736	4.64597	4.74377	4.73584	4.68199	4.81858	4.87917	4.62741	4.58134	4.78473	4.66295	4.52175	4.70019	4.91474	4.87488	5.12046	5.13201	5.38635	5.4438	5.28898	5.32935	4.70853	4.79325	4.66449	4.6283	30.055	-0.229929
ENSMUSG00000004996	5.2459	5.25729	5.33942	5.31788	5.32526	5.4215	5.58359	5.30185	5.3368	5.45361	5.40796	5.63786	5.62012	5.60995	5.5843	5.52659	5.60775	5.185	5.19421	5.23234	5.18132	5.22795	5.37653	4.15986	4.22206	4.23954	4.22866	4.24291	4.27009	4.66084	4.56168	4.6092	4.93479	4.78964	4.83941	5.28087	5.32157	5.43564	5.39946	5.62265	5.57288	5.20385	5.26193	4.20715	4.24722	4.61057	4.85461	39.3026	0.176156
ENSMUSG00000005034	9.53448	9.42038	9.24465	9.3193	9.22201	9.61578	9.79842	9.67746	9.67465	9.66983	9.39018	10.0901	9.76907	9.57686	9.84918	9.96073	9.83769	10.1548	10.2313	10.1162	10.4025	10.0178	10.1627	9.97136	9.85003	9.90775	9.87507	9.9046	9.56262	10.103	10.0175	9.7425	9.99905	9.92484	9.87178	9.39984	9.27066	9.69722	9.57822	9.812	9.88253	10.1674	10.1943	9.90971	9.78076	9.95433	9.93189	657.283	-0.237733
ENSMUSG00000005043	6.56401	6.56075	6.62877	6.69647	6.7895	6.57032	6.66521	6.5255	6.50185	6.73676	6.83397	6.86487	7.21236	7.02974	6.97518	6.85688	7.12304	6.61719	6.77865	6.91595	6.59654	7.21793	7.07253	6.89809	6.84449	6.95477	6.88873	6.60297	6.77815	6.90475	7.05277	7.07471	6.80922	7.01941	7.08691	6.58451	6.74298	6.58701	6.69086	7.03566	6.98503	6.7706	6.96233	6.89912	6.75662	7.01074	6.97185	100.648	0.429638
ENSMUSG00000005045	6.61588	6.6047	6.43297	6.39907	6.33162	7.03157	7.31883	7.18888	7.21503	7.30334	6.94733	7.74704	7.34557	7.03977	7.387	7.50313	7.33081	7.66784	7.83547	7.72728	8.08824	7.52313	7.56952	7.24096	7.15991	7.14356	7.3049	7.11384	6.76338	7.35087	7.28666	7.15216	6.66883	7.1257	6.97708	6.55118	6.36535	7.17976	7.15523	7.37746	7.40698	7.74353	7.72697	7.18148	7.06071	7.26323	6.92387	90.5243	-0.550732
ENSMUSG00000005054	8.22093	8.04949	8.1637	8.12187	8.22402	8.28189	8.07459	8.17323	8.07806	8.09217	8.2156	8.22628	8.4271	8.4323	8.38154	8.39941	8.38415	8.53138	8.44977	8.4313	8.34505	8.49231	8.41464	7.88324	7.93591	7.91087	7.8187	8.09272	8.08059	8.02629	8.0112	8.28315	8.70391	8.66052	8.8401	8.14471	8.17294	8.17657	8.12861	8.36189	8.38837	8.47082	8.41734	7.91001	7.99733	8.10688	8.73484	285.792	0.0554486
ENSMUSG00000005057	4.28498	4.28507	4.41271	4.31559	4.4203	4.50788	4.60558	4.67962	4.65135	4.6656	4.80304	4.36879	4.53684	4.51619	4.44554	4.40594	4.33258	4.48724	4.55485	4.39074	4.41217	4.60681	4.35644	2.88242	2.8014	2.89804	2.77696	2.79759	2.88898	3.97167	3.95436	4.12341	4.15577	4.06663	4.02266	4.32759	4.36794	4.59769	4.70666	4.47394	4.39469	4.47761	4.45847	2.86062	2.82118	4.01648	4.08169	20.2105	0.283388
ENSMUSG00000005069	6.9601	7.02694	7.08716	7.10387	7.09523	7.02379	7.10446	7.19791	7.07258	7.20533	7.13779	7.23895	7.2399	7.23715	7.03913	7.26597	7.12002	7.1724	7.37347	7.46792	7.46477	7.18851	7.41159	6.56053	6.51001	6.66467	6.46479	6.45214	6.64239	6.97697	7.03758	6.84354	7.08233	6.68314	6.80746	7.02473	7.09955	7.10872	7.13857	7.23866	7.14171	7.33793	7.35496	6.5784	6.51978	6.95269	6.85764	133.158	0.177235
ENSMUSG00000005078	7.93144	8.07406	8.01793	7.96591	8.18796	7.98346	7.94013	8.10493	8.05947	8.15212	8.01672	8.21267	8.43989	8.29092	8.30255	8.3798	8.46569	8.50225	8.58148	8.70615	8.43674	8.78072	8.68581	8.41632	8.25875	8.38339	8.37204	8.16798	8.19767	8.33909	8.53933	8.60598	8.3132	8.47134	8.29415	8.00781	8.07694	8.00951	8.0761	8.31449	8.38268	8.59663	8.63442	8.35282	8.2459	8.4948	8.35956	263.442	0.151848
ENSMUSG00000005087	8.71289	8.94276	8.81046	9.05578	9.06076	8.81435	8.51841	8.78124	8.63539	8.68966	8.87836	8.94179	9.26963	9.2266	9.06954	9.15038	9.33117	9.02273	9.10708	9.26151	8.96747	9.64233	9.44088	9.43406	9.38483	9.60283	9.59214	10.1918	10.1035	9.33328	9.75681	9.53577	11.6317	11.7781	12.0309	8.82204	9.05827	8.70467	8.73447	9.14601	9.1837	9.13044	9.35023	9.4739	9.96249	9.54195	11.8136	488.412	0.419208
ENSMUSG00000005089	17.1967	17.3006	17.3224	17.3757	17.3949	17.2148	17.1881	17.1724	17.2183	17.2319	17.2339	17.3495	17.6639	17.581	17.4555	17.4803	17.6323	17.7092	17.4907	17.7111	17.591	17.8561	17.7496	17.4596	17.5019	17.6173	17.5259	17.1444	17.5708	17.3763	17.5206	17.7406	16.8475	17.0122	17.0002	17.2733	17.3853	17.1918	17.228	17.5315	17.5227	17.637	17.7322	17.5263	17.4137	17.5458	16.9533	163808	0.174697
ENSMUSG00000005102	5.95521	5.77239	5.88485	5.86519	5.91502	6.10259	6.07664	6.05075	6.22899	5.98433	6.04778	6.31057	6.01906	6.25422	6.2247	6.27897	6.16289	6.29843	6.28186	6.19933	6.36408	6.18745	6.04731	6.18263	5.96535	6.06413	6.17794	6.26504	6.01657	6.04052	5.89641	6.16681	5.87124	6.1612	6.13092	5.87082	5.89011	6.07666	6.08703	6.19462	6.22219	6.25987	6.19961	6.0707	6.15319	6.03458	6.05445	58.9419	0.0606324
ENSMUSG00000005103	10.0906	10.1107	10.2694	10.2082	10.1677	10.2237	10.4332	10.2353	10.2706	10.138	10.3328	10.3321	10.0762	10.3054	10.2129	10.2828	10.08	10.3351	10.2454	10.108	10.3048	9.93762	10.2696	9.44571	9.64984	9.72031	9.59242	9.91158	9.89365	9.67385	9.59507	9.50689	10.2003	10.0189	10.1505	10.1569	10.1879	10.2974	10.2471	10.2379	10.1919	10.2295	10.1707	9.60528	9.79922	9.59194	10.1232	1154.17	0.0464198
ENSMUSG00000005107	2.05367	2.09599	2.10575	2.0576	2.07245	NA	NA	NA	NA	NA	NA	NA	NA	NA	NA	NA	NA	2.08015	2.21148	2.40532	2.2148	2.28092	2.17869	NA	NA	NA	NA	NA	NA	3.39481	3.47273	3.44465	3.53885	3.90234	3.72297	2.08514	2.06503	NA	NA	NA	NA	2.23232	2.2248	NA	NA	3.43739	3.72139	4.21991	-0.600378
ENSMUSG00000005124	NA	NA	NA	NA	NA	NA	NA	NA	NA	NA	NA	NA	NA	NA	NA	NA	NA	NA	NA	NA	NA	NA	NA	2.23192	2.00203	2.15389	2.06667	2.00036	1.99324	2.54811	2.80356	2.49442	2.51437	2.38408	2.55632	NA	NA	NA	NA	NA	NA	NA	NA	2.12928	2.02009	2.61536	2.48492	NA	NA
ENSMUSG00000005125	5.98179	6.31444	5.84768	5.90158	5.77935	6.34546	6.32691	6.24014	6.158	6.36815	6.11422	6.53367	6.3783	6.1879	6.78188	6.42823	6.53426	6.23983	6.48062	6.75766	6.40797	6.33686	6.36838	5.68104	5.84593	5.93339	5.7444	6.19306	6.15913	6.58205	7.17314	6.51776	8.78991	8.68393	8.93627	6.04797	5.84047	6.30417	6.21346	6.36662	6.58146	6.4927	6.37107	5.82012	6.0322	6.75765	8.80337	65.6401	-0.772095
ENSMUSG00000005131	3.84657	3.85775	3.78237	3.8764	3.81108	3.25576	3.09287	3.14277	3.31921	3.10815	3.10952	3.73522	3.6278	3.73254	3.7537	3.67693	3.64262	3.64299	3.56291	3.46088	3.60815	3.51087	3.63541	3.62218	3.64742	3.54279	3.53514	3.65722	3.70484	3.30006	3.21158	3.256	3.63346	3.6111	3.2703	3.8289	3.84374	3.1638	3.17896	3.69852	3.69108	3.55559	3.58481	3.60413	3.6324	3.25588	3.50495	14.4523	0.137274
ENSMUSG00000005142	8.51106	8.52216	8.59962	8.53196	8.61493	8.68333	8.66664	8.65795	8.67854	8.80707	8.86076	8.91079	9.13305	8.95378	8.9813	8.94153	9.13471	9.14008	9.03666	9.28665	9.08549	9.61341	9.2984	9.36083	9.20306	9.24172	9.32484	8.9433	8.99552	9.37844	9.54366	9.55307	9.52255	9.61138	9.47163	8.54428	8.57344	8.66931	8.78212	8.99921	9.01918	9.15446	9.33243	9.26854	9.08789	9.49173	9.53518	376.583	0.0564227
ENSMUSG00000005148	3.2171	3.32277	3.18073	3.27978	3.18066	3.89488	4.01905	4.0444	3.99068	3.91743	3.92914	4.25742	4.07787	3.88579	4.23664	4.29284	4.19181	4.88889	4.98396	4.61312	5.01747	4.79507	4.82257	4.60188	4.56095	4.49497	4.7375	4.65458	4.47509	5.02729	4.84489	4.72069	5.10631	5.02213	5.21753	3.2402	3.23022	3.98611	3.94575	4.07369	4.24043	4.82866	4.87837	4.5526	4.62239	4.86429	5.11532	9.79152	-0.144194
ENSMUSG00000005150	5.33956	5.24461	5.306	5.22677	5.34932	5.48791	5.76175	5.42526	5.67009	5.68618	5.74016	6.01039	6.11628	5.92879	5.91039	5.9366	5.87346	5.7387	5.82373	5.77973	5.70112	5.74116	5.88854	5.11726	5.10458	5.14001	5.19114	5.16985	5.19729	5.81886	5.62925	5.78131	5.79938	5.65215	5.67126	5.29672	5.28804	5.55831	5.69881	6.01849	5.90681	5.78072	5.77694	5.12062	5.18609	5.74314	5.7076	39.1507	-0.0276192
ENSMUSG00000005161	10.1986	10.1736	10.4392	10.2227	10.3089	10.2155	10.417	10.2372	10.2654	10.3018	10.3832	10.1503	10.2522	10.4146	10.1655	10.3544	10.2353	10.4761	10.4151	10.3229	10.29	10.111	10.4585	9.44369	9.51051	9.53067	9.45624	9.6091	9.74931	9.92043	9.77242	9.72295	9.80788	9.63875	9.94132	10.2705	10.2658	10.2899	10.3168	10.2724	10.2517	10.4047	10.2865	9.49496	9.60488	9.80526	9.79598	1239.75	-0.0179621
ENSMUSG00000005198	9.21747	9.1105	9.30301	9.18149	9.26736	9.20884	9.10156	9.17824	9.21039	9.11596	9.22578	9.34677	9.37622	9.40705	9.32848	9.44685	9.33985	9.55519	9.35795	9.2425	9.4348	9.2646	9.22876	8.82791	8.84277	8.88461	8.85846	8.78978	8.83821	9.11679	8.97929	9.00862	8.88735	8.83329	8.81802	9.21032	9.22442	9.16288	9.18404	9.37668	9.37173	9.38521	9.30938	8.85176	8.82881	9.0349	8.84622	595.977	0.0218398
ENSMUSG00000005204	5.95612	5.92055	6.09157	5.99459	6.09937	5.95497	6.21789	6.08245	6.10158	6.11418	6.28532	6.22731	6.09356	6.2593	6.1283	6.11221	6.09348	6.2426	6.46675	6.42666	6.39558	6.40036	6.45469	5.47391	5.38911	5.39156	5.47675	5.65056	5.55294	5.94362	5.82705	6.16292	5.97272	5.94543	5.92613	5.98942	6.04698	6.0851	6.16703	6.19339	6.11133	6.37867	6.41688	5.41819	5.56008	5.97786	5.9481	64.61	0.188276
ENSMUSG00000005225	2.48082	2.4985	2.46012	2.50163	2.46757	2.86963	2.95606	3.00501	2.83725	2.96842	2.8989	3.2295	3.27425	3.31662	3.23046	3.26451	3.30266	2.76353	2.84085	2.70375	2.8674	2.88859	2.78082	3.54925	3.50491	3.60126	3.58228	3.49895	3.3117	3.09248	3.22839	3.17046	3.23503	3.1653	3.2809	2.47981	2.4846	2.94356	2.90152	3.27346	3.26588	2.76938	2.8456	3.55181	3.46431	3.16378	3.22708	5.66606	0.100678
ENSMUSG00000005233	2.20231	2.16763	2.19254	2.16953	2.16123	2.51657	2.56852	2.47304	2.54735	2.50951	2.53238	2.41478	2.37275	2.35257	2.50704	2.3509	2.41106	2.74108	2.6109	2.59357	2.70202	2.65463	2.58608	3.15243	3.00866	2.92476	3.02576	3.38815	3.12687	3.97815	3.92944	4.03516	4.75535	4.95966	5.08204	2.18749	2.16538	2.51938	2.52975	2.38003	2.423	2.64852	2.64758	3.02862	3.18026	3.98092	4.93235	4.55597	-0.626961
ENSMUSG00000005237	4.24433	4.19075	4.29053	4.18572	4.20148	4.20815	4.22039	4.17582	4.16154	4.19676	4.14592	4.39414	4.5341	4.42938	4.54559	4.56347	4.5796	4.06814	4.15254	4.281	4.00433	4.38893	4.35465	4.44028	4.23396	4.45292	4.33392	4.33364	4.4101	4.15069	4.27493	4.42096	4.46444	4.29664	4.4496	4.24187	4.1936	4.20145	4.16807	4.45254	4.56289	4.16723	4.2493	4.37572	4.35922	4.28219	4.40356	18.7022	-0.384027
ENSMUSG00000005251	NA	NA	NA	NA	NA	NA	NA	NA	NA	NA	NA	NA	NA	NA	NA	NA	NA	2.07332	2.06443	2.15433	2.03191	2.1823	2.05683	NA	NA	NA	NA	NA	NA	2.66783	2.65763	2.74684	2.93687	2.92595	2.88183	NA	NA	NA	NA	NA	NA	2.09736	2.09035	NA	NA	2.69076	2.91488	NA	NA
ENSMUSG00000005262	7.63213	7.52384	7.49475	7.65723	7.55608	7.6386	7.74824	7.76407	7.68652	7.47286	7.62333	7.97503	7.74304	7.80092	7.99099	7.93879	7.82899	8.25803	8.01186	8.08155	8.29682	7.93469	8.06534	7.55123	7.65556	7.77372	7.65581	7.71603	7.70838	7.73508	7.6064	7.66241	7.80467	7.67725	7.51764	7.55024	7.60665	7.71697	7.59424	7.83966	7.91959	8.11715	8.09895	7.66017	7.6934	7.66796	7.66652	191.058	0.119191
ENSMUSG00000005267	5.33788	5.35148	5.37076	5.3073	5.41892	5.25743	5.29393	5.27759	5.35741	5.42642	5.40481	5.46527	5.57444	5.54078	5.79308	5.46251	5.54944	5.79948	5.86632	5.75949	5.73512	5.56562	5.7571	5.12218	5.1679	5.15602	5.18901	5.26053	5.29162	5.29906	5.27994	5.17784	5.30827	5.09095	5.08132	5.35337	5.36311	5.27632	5.39621	5.52683	5.60168	5.80843	5.68595	5.1487	5.24705	5.25228	5.16018	40.8863	0.0550777
ENSMUSG00000005268	5.08018	5.06732	4.85826	4.95064	4.92704	5.20206	5.23113	5.17898	5.20501	5.27411	5.03148	5.2746	5.394	5.25826	5.72311	5.61674	5.51046	5.94917	5.94147	6.42014	5.94813	6.37951	5.98788	6.34404	6.12552	5.62599	5.82441	5.79843	5.67206	6.08036	6.40136	6.10215	5.87246	5.98533	6.20683	5.00192	4.93884	5.20405	5.1702	5.30895	5.61677	6.10359	6.10517	6.03185	5.76496	6.19462	6.02154	32.0984	-0.354164
ENSMUSG00000005299	8.19063	8.1725	8.41145	8.16263	8.24687	8.37049	8.52991	8.36655	8.44706	8.38094	8.45433	8.52704	8.4555	8.49687	8.42708	8.45263	8.30399	8.40327	8.42316	8.5191	8.49194	8.25432	8.48035	7.72687	7.90146	7.90398	7.78232	7.79828	7.86099	7.93789	7.81453	7.94842	8.14151	8.01503	7.93362	8.25819	8.20475	8.42232	8.42744	8.49313	8.39456	8.44851	8.40887	7.8441	7.81386	7.90028	8.03005	303.136	-0.113922
ENSMUSG00000005312	10.428	10.4068	10.4296	10.4592	10.4509	10.5808	10.4587	10.4712	10.6494	10.4535	10.5055	10.7156	10.8014	10.7434	10.7634	10.6864	10.7575	11.1268	10.8615	10.8341	11.0317	10.8957	10.897	10.3526	10.4931	10.327	10.3418	10.4447	10.3458	10.6038	10.3951	10.5624	10.4458	10.3104	10.1917	10.4215	10.455	10.5035	10.5361	10.7535	10.7358	10.9408	10.9415	10.3909	10.3774	10.5204	10.3159	1384.5	0.0556029
ENSMUSG00000005320	NA	NA	NA	NA	NA	NA	NA	NA	NA	NA	NA	NA	NA	NA	NA	NA	NA	NA	NA	NA	NA	NA	NA	NA	NA	NA	NA	NA	NA	1.47302	1.48122	1.47633	1.73836	1.58536	1.74711	NA	NA	NA	NA	NA	NA	NA	NA	NA	NA	1.47686	1.69028	NA	NA
ENSMUSG00000005338	10.1165	10.087	9.48637	9.68197	9.56065	10.184	10.3731	10.3337	10.2703	10.4073	9.61532	10.8689	10.8293	10.0502	10.7301	10.8706	10.885	11.1115	11.5208	11.5634	11.5393	11.846	11.4554	11.9458	11.6507	11.8287	11.9997	11.5359	11.0744	11.8324	12.1363	11.5179	11.6435	11.8784	11.7408	9.8966	9.62131	10.2969	10.0976	10.5828	10.8286	11.3986	11.6136	11.8084	11.5367	11.8289	11.7542	919.584	-0.531658
ENSMUSG00000005354	9.2448	9.37354	9.52181	9.34016	9.4446	9.33621	9.42826	9.50978	9.48018	9.43066	9.58886	9.46884	9.72966	9.82359	9.48231	9.66697	9.74209	9.70395	9.74007	9.77287	9.6004	9.75458	9.89876	9.08057	9.11995	9.00947	9.0296	9.08099	8.97577	9.37402	9.30468	9.54923	9.31965	9.15747	9.3306	9.38005	9.39238	9.42475	9.4999	9.67403	9.63046	9.73896	9.75125	9.07	9.02879	9.40931	9.26924	671.701	0.0137386
ENSMUSG00000005357	5.71833	5.70139	5.51795	5.45433	5.67444	5.72165	5.84397	5.88095	5.72518	5.86412	5.7092	6.13812	6.46281	6.06837	6.40687	6.51417	6.43576	6.5142	6.86003	7.03718	6.62313	7.25059	6.95809	6.39248	6.33754	6.41135	6.54349	6.2634	5.99347	6.64752	6.94818	6.63302	6.21794	6.43105	6.45336	5.64589	5.56439	5.81552	5.76617	6.2231	6.45227	6.8038	6.94394	6.38046	6.26679	6.74291	6.36745	49.5167	-0.304276
ENSMUSG00000005360	15.5956	15.6651	15.6445	15.8295	15.8161	15.664	15.638	15.6056	15.6475	15.6332	15.6525	15.6521	15.9954	15.9006	15.8184	15.8374	15.9115	16.0384	15.9506	16.1077	15.8795	16.2632	16.1274	15.7699	15.771	15.8463	15.8528	15.4941	15.9284	15.5475	15.7444	15.9637	15.3537	15.5489	15.4847	15.635	15.8228	15.6358	15.6444	15.8494	15.8558	16.0322	16.09	15.7958	15.7584	15.7519	15.4624	53860.4	0.296331
ENSMUSG00000005362	8.3494	8.23085	8.24487	8.32738	8.14133	8.36623	8.38314	8.37927	8.31459	8.07597	8.10861	8.56765	8.27873	8.40081	8.49629	8.40725	8.37065	8.83642	8.65224	8.55793	8.90594	8.34434	8.691	8.35042	8.44115	8.51225	8.53695	8.5313	8.48035	8.29539	8.20027	8.17056	8.38163	8.26216	8.19196	8.27504	8.23435	8.37621	8.16639	8.41573	8.42473	8.6822	8.64709	8.43461	8.5162	8.22207	8.27858	307.689	-0.0783377
ENSMUSG00000005370	6.20426	6.27148	6.27773	6.22702	6.18765	6.35943	6.49525	6.44761	6.23176	6.228	6.46368	6.8144	6.27142	6.65645	6.49068	6.60984	6.38449	6.82811	6.68844	6.52944	6.86446	6.34457	6.5429	5.95887	5.86468	5.85771	6.00092	5.87454	5.76402	6.31084	6.14781	6.149	6.15067	5.90392	5.97838	6.25116	6.20734	6.43409	6.30782	6.58076	6.495	6.682	6.58398	5.89376	5.87983	6.20255	6.01099	75.4317	-0.140124
ENSMUSG00000005371	8.91538	8.81478	8.7574	8.95124	8.73424	9.06927	9.05009	8.96299	9.02198	8.72272	8.87576	9.17698	8.97818	9.04119	9.1285	9.08771	8.96025	9.79496	9.42101	9.43866	9.78862	9.21883	9.48519	9.11776	8.99753	9.203	9.21718	9.09349	9.05818	9.12774	9.16868	8.96633	8.94156	8.71653	8.71784	8.82918	8.84274	9.02745	8.87349	9.06545	9.05882	9.55154	9.49755	9.1061	9.12295	9.08758	8.79198	458.933	0.0284402
ENSMUSG00000005373	2.7395	2.90587	2.81084	2.73167	2.71434	2.36081	2.27869	2.35225	2.38988	2.35341	2.41692	2.54522	2.52529	2.66984	2.60252	2.60459	2.58264	3.02516	2.89741	3.01666	2.88729	2.89384	2.98048	NA	NA	NA	NA	NA	NA	NA	NA	NA	NA	NA	NA	2.81874	2.723	2.33058	2.38674	2.58012	2.59659	2.97974	2.92054	NA	NA	NA	NA	7.22614	-2.28646
ENSMUSG00000005374	6.58004	6.56013	6.65763	6.55483	6.67977	6.76379	6.96084	6.81659	6.8216	6.92002	6.93484	6.89645	6.95341	7.01996	6.84315	6.97576	6.8291	6.86239	7.05802	7.19545	6.77042	7.19574	7.14521	6.47134	6.4957	6.45093	6.51432	6.49112	6.45164	6.60884	6.73766	6.80939	6.3754	6.7157	6.83113	6.59927	6.6173	6.84707	6.89215	6.95661	6.88267	7.03862	7.03712	6.47266	6.48569	6.71863	6.64075	97.4201	0.0563224
ENSMUSG00000005378	5.78346	5.78579	5.78626	5.8103	5.96665	6.08683	6.22926	6.11306	5.96399	6.1689	6.14951	6.07281	6.23506	6.1656	6.1651	6.27141	6.22794	6.20848	6.30704	6.47542	6.18377	6.10123	6.62283	4.96965	5.15331	5.32496	5.24774	5.37047	5.09054	6.00572	5.97126	6.01233	5.96188	6.02137	6.30499	5.78517	5.88847	6.14305	6.09413	6.15782	6.22148	6.33032	6.30261	5.14931	5.23625	5.99643	6.09608	56.7766	0.3828
ENSMUSG00000005397	7.50387	7.6839	7.33346	7.63947	7.86386	7.37508	7.15335	7.38805	7.2204	7.48981	7.46493	7.29393	7.52042	7.39958	7.24817	7.36211	7.64259	7.14159	7.31682	7.57765	7.15336	7.63827	7.55378	6.97846	6.88494	6.92944	6.90085	6.46371	7.05783	6.58053	7.37756	6.50059	6.09876	6.57073	6.22746	7.50708	7.75167	7.30549	7.39172	7.40464	7.41762	7.34535	7.44847	6.93095	6.80746	6.81956	6.29898	198.71	0.517253
ENSMUSG00000005410	3.59689	3.60708	3.55555	3.53829	3.56054	3.47888	3.43811	3.455	3.49975	3.51673	3.44261	3.49743	3.46695	3.31357	3.44116	3.38412	3.42151	3.60307	3.65576	3.56559	3.71232	3.3875	3.63324	3.14943	3.11008	3.18745	3.26894	3.19938	3.11915	3.18324	3.35318	3.29392	3.38525	3.28853	3.5852	3.5865	3.54941	3.45733	3.48636	3.42598	3.4156	3.60814	3.57768	3.14899	3.19582	3.27678	3.41966	11.9498	-0.420988
ENSMUSG00000005413	6.2852	6.31096	6.39453	6.31626	6.40576	6.41593	6.33665	6.38208	6.39933	6.42175	6.54833	6.32777	6.61115	6.5136	6.50187	6.52568	6.45354	6.31495	6.27901	6.04533	6.29306	6.19859	6.28298	5.58479	5.82958	5.72932	5.72468	6.3534	6.44648	5.93479	6.0057	6.22917	7.11643	7.11536	7.1811	6.33023	6.36101	6.37822	6.45647	6.48417	6.4937	6.21309	6.25821	5.71456	6.17485	6.05655	7.13763	81.1236	0.0942564
ENSMUSG00000005417	8.31201	8.2887	8.46609	8.10451	8.22128	8.38784	8.17609	8.34175	8.49373	8.37987	8.61709	9.04519	8.86477	8.87912	8.59264	8.64692	8.84665	8.69643	8.543	8.63124	8.69874	8.87961	8.55958	9.00168	9.13188	8.84272	8.93078	9.06262	8.48204	8.62648	8.14538	9.01131	8.97131	8.70541	8.819	8.3556	8.1629	8.30189	8.4969	8.92969	8.69541	8.62356	8.71264	8.99209	8.82515	8.59439	8.8319	313.188	-0.378528
ENSMUSG00000005442	7.19764	7.40119	7.33863	7.14272	7.27817	7.29568	7.28778	7.34404	7.31755	7.52033	7.481	7.5997	7.69889	7.50031	7.48678	7.56579	7.57819	7.92458	7.94303	7.96913	8.08333	8.16591	7.84923	7.54897	7.48585	7.30184	7.4286	7.34447	7.24565	7.75668	7.83759	7.90217	7.84541	7.88987	7.9596	7.31249	7.21044	7.30917	7.43963	7.59964	7.54359	7.94558	8.03282	7.44555	7.33957	7.83215	7.89829	155.445	-0.235622
ENSMUSG00000005447	5.04209	5.02794	4.92874	4.89762	4.8604	5.01976	5.16067	4.97233	5.08829	4.96515	4.89633	5.19637	5.24786	5.06337	5.37324	5.26168	5.19717	5.55663	5.88678	5.80966	5.58855	5.73596	5.68319	5.36657	5.11685	5.10006	5.19592	5.25814	5.3109	5.29182	5.1974	5.19374	5.38215	5.40724	5.74752	4.99959	4.87901	5.05092	4.98326	5.1692	5.27736	5.75102	5.66924	5.19449	5.25499	5.22765	5.5123	31.4365	-0.664048
ENSMUSG00000005465	NA	NA	NA	NA	NA	NA	NA	NA	NA	NA	NA	NA	NA	NA	NA	NA	NA	NA	NA	NA	NA	NA	NA	NA	NA	NA	NA	NA	NA	1.44471	1.41635	1.58842	1.54553	1.48377	1.5931	NA	NA	NA	NA	NA	NA	NA	NA	NA	NA	1.48316	1.5408	NA	NA
ENSMUSG00000005469	9.18562	9.14675	9.06845	8.96652	9.0266	9.09306	9.19968	9.15631	9.11261	9.1882	9.16557	9.49704	9.33931	9.23692	9.44206	9.43527	9.25398	9.47212	9.5556	9.45121	9.54783	9.38694	9.44701	9.08436	9.06357	9.03152	9.01563	9.10983	8.98829	9.22004	9.08169	9.13037	9.47552	9.34999	9.3143	9.13361	8.99656	9.14968	9.15546	9.35776	9.3771	9.49298	9.4606	9.05982	9.03792	9.14403	9.37994	542.824	-0.246625
ENSMUSG00000005481	4.56281	4.53679	4.57492	4.46538	4.58265	4.8985	5.01622	4.82138	4.74362	5.00258	4.84812	4.91912	4.80246	4.98157	4.65617	4.86898	4.87569	4.9328	4.88492	4.94377	4.89017	4.91071	4.94018	4.09853	4.06496	4.18109	4.02597	4.1176	4.00561	4.73887	4.72767	4.67364	4.69424	4.74668	4.78561	4.55817	4.52401	4.91203	4.86477	4.90105	4.80028	4.9205	4.91369	4.11486	4.04973	4.7134	4.74218	23.2572	-0.203411
ENSMUSG00000005483	6.58354	6.29156	6.46679	6.47484	6.40449	6.6705	6.72209	6.80814	6.45331	6.74032	6.80332	7.21	6.98523	7.08084	6.96931	7.08378	6.84437	7.27267	7.3393	7.19037	7.33429	7.12271	7.2019	6.60922	6.67402	6.50333	6.66297	6.84226	6.4078	7.24414	7.12816	6.93703	7.03943	7.01051	6.81366	6.44729	6.43966	6.73358	6.66565	7.09202	6.96582	7.26745	7.21964	6.59552	6.63767	7.10311	6.95454	87.862	-0.042574
ENSMUSG00000005501	6.14935	6.09348	6.20544	6.13462	6.13678	5.94483	5.83848	5.91835	5.92614	5.87212	5.98377	6.08	5.89068	6.2001	6.12097	5.9499	5.8445	6.13861	5.87713	5.94927	5.86133	5.7482	6.01586	5.5631	5.57163	5.6757	5.55936	5.84126	5.98939	5.5479	5.6091	5.72705	5.38403	5.55343	5.71507	6.14943	6.1357	5.90055	5.92734	6.05693	5.97179	5.98834	5.87513	5.60347	5.79667	5.62802	5.55084	70.7544	-0.0485523
ENSMUSG00000005505	6.39717	6.27632	6.50416	6.51167	6.41794	6.47781	6.55397	6.73964	6.60226	6.56313	6.58616	6.55181	6.53967	6.63124	6.61421	6.67309	6.52754	6.90419	6.90081	6.82409	6.8781	6.59205	6.80376	5.8628	5.89016	6.12948	5.93197	5.82615	6.02263	6.37659	6.19351	6.13485	6.29069	6.34138	6.09017	6.39255	6.4648	6.59048	6.58385	6.57424	6.60494	6.87636	6.75797	5.96081	5.92692	6.23498	6.24075	86.2512	0.194203
ENSMUSG00000005506	8.84593	8.90669	8.80008	8.85547	8.79742	9.00918	9.09102	9.06734	9.01812	8.91207	8.96966	9.35474	9.04883	9.14381	9.19974	9.25598	9.18919	9.50343	9.54743	9.32451	9.60206	9.3101	9.37102	8.93105	8.90597	8.89969	9.00694	9.03635	8.74851	9.32142	9.14638	9.05537	9.04532	8.89727	8.91181	8.8509	8.82645	9.05585	8.96662	9.18246	9.21497	9.45846	9.42772	8.91224	8.9306	9.17439	8.95147	459.23	-0.0464227
ENSMUSG00000005510	8.32361	8.23972	8.5493	8.36984	8.55756	8.38673	8.77806	8.54737	8.55243	8.43742	8.55971	8.71023	8.66084	8.73299	8.65833	8.77572	8.71262	8.68087	8.81316	8.70063	8.63318	8.42362	8.87306	7.7617	7.74528	7.79214	7.78503	7.77038	8.19103	7.93895	7.89081	7.89738	8.18426	7.7134	7.92994	8.37088	8.4637	8.57072	8.51652	8.70135	8.71556	8.73155	8.64329	7.76638	7.91548	7.90904	7.94253	342.528	0.170066
ENSMUSG00000005514	9.65072	9.72543	9.88814	9.82913	9.97164	9.75585	9.79197	9.88125	9.70768	9.85251	10.0124	9.73056	10.0709	10.0771	9.67794	9.92339	9.85683	9.66745	9.83325	10.0329	9.61974	9.90767	10.0438	9.14489	9.22668	9.07456	9.26266	9.17648	9.36123	9.2712	9.65558	9.41957	9.28742	9.38152	9.63902	9.75476	9.90038	9.80969	9.85753	9.95953	9.81939	9.84452	9.85707	9.14871	9.26679	9.44878	9.43599	905.632	0.244314
ENSMUSG00000005533	8.47081	8.56568	8.63339	8.57894	8.65753	8.43986	8.41254	8.43755	8.52991	8.7095	8.71469	8.836	8.94804	8.86438	8.86701	8.87367	8.98508	8.92665	8.82775	9.08802	9.00931	9.41221	9.06036	8.8677	8.96022	8.90427	8.9342	8.68859	8.9082	9.03802	9.28266	9.36423	9.07867	9.27871	9.17484	8.55662	8.61824	8.42998	8.65137	8.88281	8.90858	8.94748	9.16063	8.91073	8.84366	9.2283	9.17741	383.776	0.11394
ENSMUSG00000005534	8.55359	8.6265	8.56286	8.67099	8.81369	8.71365	8.70256	8.72709	8.59978	8.8052	8.8085	8.98016	9.23617	9.03756	9.05416	9.03525	9.14467	9.23022	9.18428	9.37898	9.24196	9.64047	9.36768	9.27984	9.17167	9.29882	9.33319	8.76311	8.92149	9.31543	9.53175	9.5936	8.89006	9.19224	9.0521	8.58098	8.74234	8.71443	8.73783	9.08463	9.07803	9.26449	9.4167	9.25011	9.00593	9.48026	9.0448	402.392	0.306024
ENSMUSG00000005566	8.48569	8.55213	8.51325	8.41926	8.51909	8.63035	8.62894	8.55673	8.54515	8.48503	8.70624	8.80895	8.80574	8.73798	8.53005	8.85056	8.75016	8.94972	8.85997	8.87764	8.93662	8.73766	8.87038	7.99668	8.11498	8.11473	8.01021	8.06856	8.13147	8.50505	8.3705	8.42728	8.16479	8.16489	8.12919	8.51702	8.46917	8.60534	8.57881	8.78422	8.71026	8.89578	8.84822	8.07546	8.07008	8.43427	8.15296	361.861	-0.0865921
ENSMUSG00000005575	9.0506	9.10877	8.9619	8.97843	9.03298	9.08966	9.02123	9.14632	9.12452	9.00772	9.03554	9.44202	9.411	9.38948	9.42274	9.436	9.44547	9.39317	9.60952	9.6409	9.44425	9.60668	9.56993	9.11692	9.09536	9.03182	9.14814	9.19463	9.01473	9.46348	9.34591	9.2989	9.46067	9.41026	9.24499	9.04042	9.00571	9.08574	9.05593	9.41417	9.43473	9.54786	9.54028	9.08136	9.11917	9.36943	9.37197	522.405	-0.0633616
ENSMUSG00000005580	6.79251	6.7707	6.77522	6.74589	6.73453	6.87561	7.07551	7.05204	6.97607	6.99511	6.90986	7.69518	7.57839	7.23026	7.4779	7.50802	7.63478	7.88335	8.02526	8.07075	8.11973	8.31334	7.98907	8.10569	7.94357	8.12371	8.20572	7.85888	7.61748	8.45253	8.41968	8.15027	8.24063	8.5187	8.04477	6.77948	6.74021	7.00105	6.96035	7.50128	7.54023	7.99312	8.14071	8.05766	7.89402	8.34083	8.26803	108.757	-0.104362
ENSMUSG00000005583	8.30144	8.23078	7.9485	7.93201	7.89305	8.66041	8.66067	8.67677	8.61039	8.56824	8.08157	9.63381	8.89808	8.46649	9.12871	9.22798	9.07595	9.57493	9.97457	9.59651	10.0917	9.53066	9.67102	9.50974	9.46626	9.54602	9.67919	9.44213	8.9205	9.67937	9.858	9.21955	9.33762	9.3756	9.0755	8.16024	7.91253	8.66595	8.42007	8.99946	9.14421	9.71534	9.76446	9.50734	9.34727	9.58564	9.2629	272.731	-0.522341
ENSMUSG00000005609	6.87861	6.83679	6.80081	6.98635	6.79936	7.05957	7.26883	7.22802	7.18194	7.02114	7.02626	7.12209	6.94475	6.96367	7.29916	7.2346	6.98912	7.33578	7.40462	7.2947	7.72035	6.94721	7.13061	6.77579	6.72286	6.97857	7.00292	6.83904	6.72652	6.86189	6.94049	6.92757	7.0888	6.96307	7.09445	6.83874	6.89285	7.18547	7.07645	7.01017	7.17429	7.34503	7.26606	6.82574	6.85616	6.90998	7.04877	116.934	0.141106
ENSMUSG00000005610	11.6072	11.6041	11.4626	11.6822	11.5228	11.663	11.4546	11.5403	11.5953	11.4572	11.5023	11.7582	11.81	11.8784	11.9102	11.745	11.883	12.0313	11.927	11.8837	11.9748	11.8924	11.8803	11.7345	11.7731	11.7159	11.7355	11.8325	11.8354	11.8047	11.7106	11.8913	11.9402	11.9541	11.9432	11.558	11.6025	11.5526	11.5183	11.8155	11.8461	11.9473	11.9158	11.7412	11.8011	11.8022	11.9458	3062.09	0.0730182
ENSMUSG00000005615	7.98877	7.91612	8.068	8.13497	8.0059	8.01886	8.08432	7.96457	8.04391	7.9031	8.15094	8.04092	7.89133	8.14682	8.05561	8.07704	7.92671	8.37978	8.06977	8.08024	8.17506	7.74169	8.18674	7.49511	7.56589	7.50183	7.55148	7.57	7.92022	7.60108	7.55287	7.64723	7.79994	7.60038	7.70648	7.99096	8.07043	8.02258	8.03265	8.02636	8.01979	8.17659	8.0345	7.52094	7.68056	7.60039	7.70227	261.06	0.156426
ENSMUSG00000005621	7.11198	7.20746	7.16863	7.18963	7.1909	7.39471	7.10275	7.34537	7.23376	7.25587	7.41462	7.33112	7.53452	7.63311	7.44649	7.52056	7.45829	7.63493	7.48688	7.5113	7.46779	7.71668	7.47225	7.21926	7.16294	7.02316	7.19231	7.12107	6.99661	7.47606	7.25226	7.68767	7.11661	7.04475	6.72522	7.16269	7.19027	7.28095	7.30141	7.49958	7.47511	7.54437	7.55224	7.13512	7.10333	7.472	6.96219	144.49	0.0639248
ENSMUSG00000005625	8.70468	8.77721	8.72101	8.72943	8.65413	8.81252	8.92769	8.8075	8.89942	8.8189	8.93488	9.05474	9.04838	9.064	9.04269	9.01667	8.96251	9.34611	9.07624	9.01699	9.15684	8.85432	9.06956	8.52573	8.61297	8.52721	8.54501	8.67412	8.76981	8.76272	8.51605	8.55462	8.41451	8.3864	8.44944	8.7343	8.69178	8.84924	8.8844	9.0557	9.00729	9.14644	9.02691	8.5553	8.66298	8.61113	8.41678	421.468	-0.0800278
ENSMUSG00000005656	8.61711	8.48883	8.59996	8.68671	8.5912	8.71813	8.70165	8.64822	8.68612	8.53985	8.65697	8.83545	8.72403	8.95627	8.88834	8.84043	8.7485	9.1475	8.93127	8.81821	9.03044	8.6589	8.9869	8.40987	8.57436	8.46502	8.41638	8.66807	8.68441	8.3722	8.30545	8.5396	8.54564	8.37479	8.52947	8.56863	8.63895	8.68933	8.62765	8.83858	8.82576	8.96566	8.89208	8.48308	8.58962	8.40575	8.4833	388.136	0.128276
ENSMUSG00000005667	2.78407	2.80201	2.82954	2.81854	2.76852	3.25019	3.27263	3.23892	3.31563	3.19716	3.33645	3.44485	3.45085	3.42082	3.42002	3.46766	3.34339	3.48064	3.58695	3.75231	3.61041	3.48924	3.68097	2.95211	2.75407	2.85977	3.15051	3.02693	3.0733	3.58469	3.66876	3.6066	3.73805	3.65603	3.76781	2.8052	2.79353	3.25391	3.28308	3.43884	3.41036	3.60663	3.59354	2.85532	3.08358	3.62002	3.72063	7.05105	-0.221032
ENSMUSG00000005672	6.89237	6.8299	6.39361	6.59858	6.35084	6.98168	6.98009	7.13883	6.93368	7.05952	6.57608	7.57414	7.4972	6.96925	7.55924	7.52033	7.68516	7.9578	8.03196	8.20574	8.24828	8.45967	8.10991	8.59389	8.35242	8.55314	8.66959	8.21353	8.0063	8.53048	8.69722	8.19476	8.34062	8.47287	8.29266	6.70529	6.47471	7.03354	6.85643	7.34686	7.58824	8.06517	8.27262	8.49982	8.29647	8.47415	8.36872	102.978	-0.67647
ENSMUSG00000005674	6.60415	6.63432	6.74188	6.62398	6.75653	6.59203	6.67861	6.6819	6.65998	6.83908	6.80006	6.88294	6.94625	6.92418	6.94761	6.83637	6.90523	6.83221	6.97127	6.96758	6.88777	7.10282	6.92036	6.34093	6.40038	6.36071	6.20507	6.19758	6.31915	6.58929	6.69053	6.74686	6.32847	6.42195	6.58106	6.66012	6.69025	6.65085	6.76637	6.91779	6.8964	6.92369	6.97032	6.36734	6.2406	6.67556	6.44383	102.057	0.0857161
ENSMUSG00000005681	NA	NA	NA	NA	NA	NA	NA	NA	NA	NA	NA	2.24576	2.29239	2.24535	2.25195	2.24345	2.18835	2.10924	2.19474	2.09723	2.10148	1.97212	2.15067	2.23776	2.15912	2.24104	2.27964	2.11245	2.14688	3.08536	3.02463	3.03798	3.27781	3.15782	3.31595	NA	NA	NA	NA	2.26117	2.22791	2.13374	2.07476	2.21264	2.17966	3.04932	3.25052	NA	NA
ENSMUSG00000005682	5.00528	5.13187	5.10143	5.12518	5.15401	4.85441	4.79929	4.84202	4.95113	4.92101	4.89595	5.17131	5.04924	5.05873	5.29638	5.04041	5.09733	5.24842	5.25119	5.21851	5.16555	5.08452	5.16744	4.89117	4.79457	4.92687	4.74647	4.72003	4.75174	4.70479	4.78137	4.64098	4.62021	4.54196	4.56673	5.07953	5.1396	4.83191	4.9227	5.09309	5.14471	5.23938	5.13917	4.87087	4.73941	4.70905	4.5763	34.4399	0.285976
ENSMUSG00000005683	11.3273	11.3421	11.4909	11.4914	11.3853	11.3368	11.3472	11.322	11.3936	11.1872	11.4783	11.2106	11.1803	11.5269	11.1726	11.3127	11.1812	11.4823	11.2558	11.1553	11.3257	10.9444	11.2531	10.1895	10.4605	10.4401	10.2612	10.313	10.6134	10.5618	10.3929	10.5746	10.0187	9.90947	10.0172	11.3868	11.4384	11.3353	11.353	11.3059	11.2221	11.2978	11.1744	10.3633	10.3958	10.5098	9.98177	2723.68	0.0810109
ENSMUSG00000005686	7.49943	7.34599	7.49644	7.46931	7.59082	7.43581	7.71667	7.53377	7.44125	7.58367	7.75619	7.52671	7.5438	7.73959	7.61276	7.64364	7.46578	7.67738	7.52936	7.4842	7.65439	7.29542	7.62953	6.55774	6.83574	6.86704	6.73553	7.22056	7.28445	7.19889	7.37589	7.07083	8.23554	8.1329	8.41366	7.44729	7.53007	7.56209	7.59371	7.60337	7.57406	7.56365	7.52645	6.75351	7.08018	7.2152	8.2607	179.046	0.183639
ENSMUSG00000005687	8.76642	8.63307	8.65166	8.74911	8.61935	8.84423	8.78163	8.86244	8.96064	8.79725	8.81109	9.14646	9.20231	9.23313	9.11246	9.12576	9.30177	9.41245	9.18548	9.2807	9.22273	9.31333	9.30166	9.11018	9.1775	8.96924	9.03596	9.20448	8.97294	9.09993	9.00105	9.24721	9.25357	9.1831	9.06745	8.68372	8.68423	8.82943	8.85633	9.19397	9.18	9.29288	9.27924	9.08564	9.07113	9.11606	9.16804	412.421	-0.000974975
ENSMUSG00000005698	8.69739	8.64384	8.46218	8.55241	8.47988	8.71204	8.5853	8.68462	8.72611	8.62148	8.61804	8.79225	8.81852	8.87827	8.92882	8.83155	8.88789	9.24669	8.97133	9.02935	9.14681	9.02171	9.04536	8.92786	8.92201	8.85293	8.7719	8.88052	8.73754	8.92219	8.68267	8.95393	8.56453	8.58371	8.37098	8.60114	8.51614	8.66066	8.65521	8.82968	8.88275	9.08246	9.07129	8.90094	8.79665	8.85293	8.50641	381.555	-0.168496
ENSMUSG00000005699	4.55269	4.63117	4.66109	4.50554	4.67728	4.8432	5.04821	5.02001	4.99726	5.01065	5.13865	5.15207	5.21535	5.13221	4.97782	5.13341	5.15436	5.05451	5.06895	5.19508	5.08428	5.18432	5.20496	4.18217	4.33362	4.29796	4.31075	4.238	4.31209	5.00737	4.87604	5.10547	5.17435	5.07474	5.24084	4.61498	4.59141	4.97047	5.04885	5.16654	5.08853	5.10618	5.15786	4.27125	4.28695	4.9963	5.16331	24.297	-0.124338
ENSMUSG00000005705	NA	NA	NA	NA	NA	NA	NA	NA	NA	NA	NA	NA	NA	NA	NA	NA	NA	NA	NA	NA	NA	NA	NA	NA	NA	NA	NA	NA	NA	2.51954	2.53891	2.5274	3.3676	2.67652	2.99207	NA	NA	NA	NA	NA	NA	NA	NA	NA	NA	2.52862	3.01206	NA	NA
ENSMUSG00000005716	6.26452	6.30551	6.12538	6.33983	6.13276	6.40608	6.18615	6.36339	6.36556	6.41313	6.53962	6.72966	6.65228	6.52581	6.751	6.74662	6.65609	6.61181	6.77186	6.93885	6.48206	6.71818	6.91523	6.15281	6.19632	6.14457	5.76941	6.04351	6.04809	6.29828	6.01263	6.33706	6.50893	6.47077	6.38367	6.2318	6.2363	6.31854	6.43943	6.63591	6.7179	6.77417	6.70516	6.16457	5.95367	6.21599	6.45446	76.263	0.0156721
ENSMUSG00000005718	3.49909	3.48388	3.49146	3.45041	3.52459	3.96982	3.98597	3.95479	3.98323	4.15769	4.06428	4.07537	4.02765	4.21075	4.07296	4.14892	4.17011	4.101	3.95629	4.03504	3.77763	3.85993	3.98021	3.34355	3.24482	3.24231	3.32851	3.18283	3.23417	2.78652	2.86055	2.60914	2.69425	2.70612	2.67404	3.49148	3.4875	3.97019	4.0684	4.10459	4.13066	4.03077	3.87259	3.2769	3.2485	2.75207	2.69147	11.1498	-0.0304826
ENSMUSG00000005732	9.17049	9.06166	9.01236	9.06379	8.92996	9.28129	9.07496	9.03331	9.14474	9.00842	9.04376	9.2195	9.31428	9.38838	9.49475	9.27264	9.42548	9.54644	9.39862	9.37274	9.37081	9.31064	9.4056	9.08353	9.16219	9.09203	9.08533	9.24678	9.04491	9.1334	9.16345	9.19229	9.40123	9.37178	9.43697	9.08151	8.99688	9.12985	9.06564	9.30739	9.39762	9.43927	9.36235	9.11258	9.12567	9.16305	9.40333	531.434	-0.154711
ENSMUSG00000005774	6.36749	6.32993	6.33059	6.34312	6.27664	6.20609	6.23713	6.1458	6.24552	6.18442	6.22785	6.18754	6.17637	6.31651	6.35086	6.2985	6.2695	6.57155	6.38306	6.3653	6.47878	6.27655	6.35246	6.25761	6.07082	5.99826	6.14201	6.02626	6.22057	6.12556	5.81181	5.9742	6.05331	5.94553	5.86844	6.34267	6.30988	6.19634	6.21926	6.22681	6.30629	6.43997	6.36927	6.1089	6.12961	5.97052	5.95576	80.6235	-0.101361
ENSMUSG00000005779	9.16346	9.20125	9.36445	9.26871	9.3485	9.36472	9.53445	9.50446	9.38705	9.45784	9.49186	9.56231	9.56889	9.64914	9.45272	9.64913	9.51196	9.47075	9.80032	9.67025	9.57592	9.45146	9.71183	8.6728	8.67832	8.77199	8.67071	8.77893	8.8601	9.16455	9.10736	9.01806	9.22597	8.98905	9.30242	9.24305	9.3086	9.46788	9.44558	9.59345	9.53794	9.64711	9.57974	8.7077	8.76991	9.09666	9.17248	619.006	0.110668
ENSMUSG00000005802	6.83124	6.84351	6.7852	6.80877	6.90468	7.06078	6.9147	6.94782	7.02023	6.97226	6.8508	7.42423	7.56743	7.35539	7.47863	7.50875	7.5207	7.42894	7.57772	7.62288	7.52874	7.9709	7.6573	7.88609	7.69104	7.89124	7.91676	7.70635	7.80387	7.7181	7.86372	7.77173	7.5541	7.92043	7.67146	6.81998	6.85672	6.97443	6.94776	7.44901	7.50269	7.54318	7.71898	7.82279	7.809	7.78452	7.71533	114.165	0.101559
ENSMUSG00000005803	7.17972	7.25107	7.33363	7.26278	7.25643	7.12325	7.23094	7.06731	7.26119	7.00216	7.29563	7.28651	7.17051	7.34991	7.29563	7.19734	7.14441	7.39867	7.18093	7.01634	7.05778	6.82914	7.08285	6.13705	6.48673	6.25067	6.2436	6.46451	6.43246	6.55371	6.41406	6.55999	6.76102	6.65235	6.55769	7.2548	7.25961	7.1405	7.18632	7.26897	7.21246	7.19864	6.98992	6.29149	6.38019	6.50925	6.65702	153.152	0.00547927
ENSMUSG00000005804	6.87191	6.95432	6.83169	6.81344	6.69197	7.06683	6.96988	6.88646	7.12869	7.00668	6.82506	7.17432	7.19509	7.16482	7.25513	7.13585	7.30679	7.31763	7.40825	7.33907	7.21322	7.48181	7.37753	7.31378	7.20158	7.27462	7.28155	7.34891	7.24782	7.35227	7.24857	7.41623	7.66275	7.47154	7.53126	6.88597	6.75271	6.97439	6.98681	7.17808	7.23259	7.35498	7.35752	7.26333	7.29276	7.33902	7.55518	115.044	-0.350868
ENSMUSG00000005813	7.06799	7.02119	6.97606	6.94056	7.08887	7.30904	7.34087	7.29879	7.16925	7.33096	7.23986	7.39115	7.28614	7.42885	7.46817	7.39818	7.35955	7.57227	7.72615	7.5992	7.62922	7.3691	7.57034	7.05123	7.02817	7.02824	7.09216	7.13551	7.02611	7.24011	7.28111	7.16712	7.21903	7.04021	6.99889	7.02175	7.01472	7.31623	7.24669	7.36872	7.40863	7.63254	7.52289	7.03588	7.08459	7.22945	7.08604	129.832	-0.00626698
ENSMUSG00000005823	7.46961	7.56541	7.76667	7.56342	7.68686	7.44377	7.60242	7.52725	7.59499	7.78369	7.74209	7.82955	8.18651	8.00808	7.93411	7.95513	8.08069	7.99444	7.94891	8.28275	7.88193	8.47166	8.12723	7.84211	7.74335	7.58226	7.90229	7.37089	7.6559	7.85499	8.08812	8.09415	7.67039	7.87681	7.60955	7.60056	7.62514	7.52448	7.70693	8.00805	7.98998	8.07537	8.16027	7.72258	7.64302	8.01242	7.71892	196.591	0.0420034
ENSMUSG00000005846	8.76718	8.5819	8.52696	8.65445	8.42214	8.77853	8.44054	8.57804	8.54902	8.24601	8.39771	8.76994	8.51065	8.79752	8.83155	8.70472	8.73033	9.33523	9.00436	8.85439	9.23052	8.68743	8.78049	8.62569	8.70747	8.58851	8.71239	8.71026	8.62391	8.59491	8.4665	8.50465	8.5744	8.45191	8.37279	8.62535	8.5383	8.59904	8.39758	8.6927	8.75553	9.06466	8.89948	8.64056	8.68219	8.52202	8.46637	389.195	-0.164116
ENSMUSG00000005871	10.3918	10.319	10.2126	10.3745	10.3091	10.4586	10.236	10.3396	10.3031	10.2698	10.2792	10.5123	10.5307	10.6367	10.5355	10.6029	10.5705	10.9162	10.6697	10.7652	10.9716	10.7345	10.7351	10.7768	10.638	10.6086	10.8215	10.5703	10.6273	10.5177	10.6936	10.6031	10.1671	10.2801	10.3142	10.3078	10.3418	10.3447	10.284	10.5599	10.5697	10.7837	10.8138	10.6745	10.673	10.6048	10.2538	1282.43	0.0531231
ENSMUSG00000005873	11.3353	11.3915	11.2985	11.3842	11.2628	11.2724	11.1309	11.2142	11.2673	11.3175	11.2155	11.3035	11.6768	11.5984	11.4684	11.5002	11.6373	11.5964	11.685	11.8111	11.5562	11.9429	11.864	11.6169	11.5598	11.6184	11.6365	11.3849	11.609	11.4774	11.7012	11.6963	11.4553	11.7029	11.7401	11.3418	11.3235	11.2058	11.2667	11.5262	11.5353	11.6975	11.7877	11.5984	11.5434	11.625	11.6328	2585.93	-0.0284421
ENSMUSG00000005881	9.69694	9.84569	9.79951	9.76425	9.86749	9.81721	9.91428	9.88044	9.84879	10.0104	9.94486	9.92914	10.321	10.1849	10.1049	10.169	10.2566	10.0386	10.1748	10.3332	9.9905	10.4565	10.3207	9.98836	10.0043	9.91095	9.98497	9.90072	9.99023	9.94688	10.1757	10.1293	10.0365	10.2736	10.4347	9.78071	9.81587	9.87064	9.93468	10.145	10.1769	10.1822	10.2559	9.96787	9.95864	10.084	10.2482	889.875	0.0602926
ENSMUSG00000005882	7.29752	7.31377	7.41583	7.40895	7.39166	7.30141	7.44886	7.40621	7.40855	7.36637	7.53398	7.51223	7.57399	7.65221	7.56259	7.57985	7.48903	7.49664	7.40259	7.48138	7.48378	7.39495	7.52901	6.97233	7.02576	6.94262	6.88926	7.05512	7.18648	7.03699	7.23282	7.18947	7.2164	7.35938	7.30906	7.34237	7.4003	7.38549	7.4363	7.57948	7.54382	7.4602	7.46925	6.98024	7.04362	7.1531	7.29495	165.123	0.126629
ENSMUSG00000005886	8.58983	8.5489	8.56473	8.51894	8.60818	8.60792	8.53628	8.54105	8.58843	8.54644	8.60011	8.94388	8.97433	8.92388	8.85544	8.89551	8.95092	9.08335	8.94354	9.00638	8.98751	9.02666	8.97638	8.66656	8.69755	8.66825	8.6298	8.53728	8.56787	8.85386	8.81649	8.89888	8.51677	8.43447	8.29608	8.56782	8.56356	8.56175	8.57833	8.94736	8.90062	9.01109	8.99685	8.67745	8.57832	8.85641	8.41577	379.109	-0.00437124
ENSMUSG00000005892	5.30069	5.27599	4.85235	4.85308	4.72282	5.42345	5.05758	4.71078	4.87436	5.05579	4.59827	5.01671	5.15882	4.77699	5.1085	5.09254	4.94061	5.56085	5.77679	6.19478	5.73977	6.20359	5.88647	6.55023	5.4975	5.26286	5.51454	5.32071	5.16522	6.12436	6.34801	6.11061	6.0343	6.13046	6.34643	5.14301	4.78795	5.06394	4.84281	4.98418	5.04721	5.84414	5.94328	5.7702	5.33349	6.19433	6.17039	35.7642	-2.17333
ENSMUSG00000005893	8.47338	8.43181	8.35861	8.43826	8.34464	8.46563	8.42242	8.36278	8.49622	8.41103	8.42584	8.69888	8.7449	8.65207	8.7498	8.67049	8.72746	8.68009	8.74547	8.75829	8.72094	8.8561	8.75674	8.53967	8.54539	8.522	8.46203	8.39306	8.33378	8.68131	8.72279	8.52993	8.7661	8.75417	8.45479	8.42127	8.39145	8.41694	8.44436	8.69862	8.71592	8.72795	8.77793	8.53568	8.39629	8.64468	8.65835	340.725	-0.0591199
ENSMUSG00000005897	5.7951	5.90106	5.80388	5.8475	5.81056	5.75739	5.82241	5.74723	5.9848	5.75543	5.83126	6.03485	6.16337	6.16673	6.12391	6.13795	6.24717	6.45323	6.31142	6.43316	6.49748	6.28377	6.29137	5.80585	6.01727	5.78924	5.82946	5.85324	5.89083	5.82999	5.991	5.8572	5.99366	5.8143	5.80736	5.83335	5.82903	5.77568	5.85716	6.12165	6.16968	6.39927	6.35754	5.87079	5.85784	5.89273	5.87177	57.1641	-0.01977
ENSMUSG00000005899	7.15666	7.24749	7.36785	7.16163	7.40118	7.05828	7.22211	7.11188	7.1424	7.06125	7.17639	7.2877	7.34419	7.42904	7.29264	7.33277	7.31844	7.22135	7.30569	7.25901	7.12074	7.11137	7.17275	6.51781	6.62958	6.49953	6.40386	6.60756	6.65611	6.67129	6.52239	6.76176	7.12521	6.85923	6.85435	7.25733	7.2814	7.13076	7.12668	7.35365	7.31462	7.26202	7.13495	6.54897	6.55584	6.65181	6.94626	154.779	0.0673531
ENSMUSG00000005907	4.7064	4.73276	4.76499	4.74256	4.8086	4.85699	4.9475	4.96124	4.9057	4.81638	4.9836	5.29994	5.19206	5.04478	5.15294	5.30656	4.98986	5.3234	5.3787	5.2989	5.42686	5.27234	5.42173	5.07126	4.98755	5.16307	5.05832	5.12281	4.99837	4.74001	5.04083	4.77774	4.93059	4.80937	5.07785	4.73472	4.77558	4.92191	4.90189	5.17893	5.14979	5.33367	5.37364	5.07396	5.05983	4.85286	4.93927	26.8345	0.24055
ENSMUSG00000005917	5.35498	5.35986	5.31655	5.3921	5.41662	5.17656	5.19774	5.24056	5.23031	5.3032	5.39305	4.95754	5.1618	5.22618	5.06	5.06687	5.05802	5.04569	5.07732	4.97273	4.93902	5.02676	4.9895	4.00284	4.1723	4.11836	3.93179	3.9655	4.0955	4.35556	4.19521	4.3685	4.19485	4.29154	4.19605	5.3438	5.40436	5.20495	5.30885	5.11517	5.06163	5.03191	4.98509	4.09783	3.9976	4.30642	4.22748	41.3086	0.262845
ENSMUSG00000005936	7.03057	6.96957	7.04488	6.97707	6.99785	7.12774	7.03079	7.05625	7.05033	6.80984	7.00597	7.46387	7.1937	7.36503	7.31909	7.20731	7.1458	7.29554	7.38299	7.35087	7.35591	7.20287	7.25925	6.94577	6.91267	6.85119	6.93814	7.05368	7.05947	7.05987	6.98504	6.98405	7.06446	6.89454	6.91987	7.01501	6.98746	7.07159	6.95538	7.34087	7.22407	7.34313	7.27268	6.90321	7.0171	7.00965	6.95963	128.395	-0.0691362
ENSMUSG00000005947	2.10737	2.11229	2.03804	2.10154	2.03839	2.30462	2.31569	2.29821	2.43159	2.37011	2.29991	2.86376	2.74467	2.67763	2.80987	2.69613	2.7332	NA	NA	NA	NA	NA	NA	NA	NA	NA	NA	NA	NA	NA	NA	NA	NA	NA	NA	2.0859	2.06997	2.30617	2.3672	2.76202	2.7464	NA	NA	NA	NA	NA	NA	4.42527	-0.470684
ENSMUSG00000005949	7.64672	7.78525	7.78109	7.85814	8.00568	7.59487	7.60865	7.73228	7.44804	7.68879	7.7961	7.80752	8.32282	8.1386	8.12083	8.1027	8.30298	8.25226	8.18266	8.41138	8.11214	8.62793	8.37945	8.01861	7.92474	8.00829	8.1443	7.78401	8.10091	8.01864	8.35882	8.29535	7.70983	7.95228	7.98726	7.73768	7.93191	7.64527	7.64431	8.08965	8.1755	8.2821	8.37317	7.98388	8.00974	8.22427	7.88312	226.996	0.406119
ENSMUSG00000005951	4.28047	4.41344	4.31652	4.39097	4.29342	4.25792	4.1647	4.31142	4.18161	4.1575	4.29917	4.42262	4.31828	4.43342	4.36478	4.36602	4.26377	4.17876	4.11794	4.13666	4.08393	4.12298	4.19995	3.47397	3.57956	3.51465	3.62269	3.5898	3.55824	3.13378	3.33418	3.11578	3.38876	3.29822	3.4492	4.33681	4.34219	4.24468	4.21276	4.39144	4.33152	4.14445	4.13562	3.52273	3.59024	3.19458	3.37873	20.563	0.031482
ENSMUSG00000005958	7.36527	7.48322	7.48628	7.46334	7.51116	7.2535	7.29088	7.34845	7.3669	7.52319	7.73898	7.76707	7.90379	7.91302	7.63164	7.71784	7.85925	7.80373	7.82415	7.92439	7.85566	8.0266	7.94021	7.64504	7.66477	7.46371	7.41098	7.19175	7.48448	7.71767	7.78314	8.19619	6.6492	6.90511	7.12606	7.44492	7.48725	7.29761	7.54302	7.8613	7.73624	7.85076	7.94082	7.59118	7.36241	7.899	6.89345	176.499	0.092734
ENSMUSG00000005968	NA	NA	NA	NA	NA	NA	NA	NA	NA	NA	NA	1.84792	1.91712	1.8162	1.86839	1.94036	1.83844	NA	NA	NA	NA	NA	NA	1.78175	1.79707	1.88267	1.69612	1.74646	1.9294	2.86109	2.76142	2.81256	2.88883	2.93274	3.02168	NA	NA	NA	NA	1.86041	1.88239	NA	NA	1.8205	1.79066	2.81169	2.94775	NA	NA
ENSMUSG00000005973	7.94647	8.03793	7.81571	7.98215	7.91957	7.82883	7.96165	7.81159	7.98884	8.02933	7.88266	8.20152	8.39998	8.2603	8.51238	8.33892	8.42977	8.42998	8.46891	8.67707	8.40508	8.76301	8.65281	8.91445	8.70271	8.74705	8.82266	8.64428	8.86642	8.5369	8.80554	8.67595	8.55285	8.88933	9.00479	7.93337	7.95086	7.86736	7.96694	8.28727	8.42702	8.52532	8.60696	8.78807	8.77779	8.67279	8.81566	246.738	0.028594
ENSMUSG00000005981	8.93256	8.84785	9.15455	9.05297	9.08826	8.99183	9.03224	9.00672	9.04494	8.88291	9.05279	8.95482	8.83033	9.08167	8.8855	9.01708	8.7977	9.11353	8.95777	8.79618	9.05882	8.52579	8.86319	8.05791	8.34553	8.21697	8.15752	8.3124	8.4163	8.26147	8.09693	8.27861	8.49567	8.27095	8.29454	8.97832	9.07062	9.01026	8.99355	8.95561	8.90009	8.95583	8.81593	8.2068	8.2954	8.21233	8.35372	520.82	0.150705
ENSMUSG00000005982	6.52154	6.64935	6.56703	6.66015	6.55991	6.31937	6.21152	6.27009	6.1707	6.2606	6.33672	6.41134	6.54651	6.49756	6.44309	6.60145	6.57868	6.7411	6.71516	6.71659	6.4868	6.72983	6.69829	6.41369	6.33274	6.30254	6.20517	6.33566	6.2318	6.52675	6.65243	6.68805	6.48126	6.57132	6.44676	6.57931	6.61003	6.26699	6.25601	6.48513	6.54107	6.72428	6.63831	6.34966	6.25754	6.62241	6.49978	96.8613	0.0808746
ENSMUSG00000005983	3.96018	3.99509	3.90459	3.85907	3.90592	3.83302	3.78721	3.76133	3.81761	3.84465	3.80735	4.05727	4.1873	4.13333	4.20061	4.11487	4.14414	4.38381	4.44903	4.31227	4.47689	4.51125	4.61477	3.48514	3.53382	3.46284	3.52777	3.62587	3.49581	4.35069	4.05378	4.15212	4.42622	4.2652	4.12457	3.95329	3.8825	3.79385	3.8232	4.12597	4.1532	4.3817	4.5343	3.49393	3.54982	4.18553	4.272	15.3361	-0.664569
ENSMUSG00000005986	5.03069	5.09824	4.89963	4.86862	4.95402	5.29497	5.43669	5.40253	5.34275	5.57501	5.2788	5.89576	5.80457	5.62532	5.76655	5.87701	5.67422	5.63267	5.93674	5.97499	5.70999	5.9441	5.98329	5.20882	5.28096	5.40143	5.27929	5.26869	5.1948	5.51061	5.68032	5.25356	5.48928	5.54629	5.61857	5.00952	4.91132	5.37806	5.39885	5.77521	5.77259	5.84813	5.87913	5.29707	5.24759	5.48149	5.55138	31.8073	-0.526098
ENSMUSG00000005994	NA	NA	NA	NA	NA	NA	NA	NA	NA	NA	NA	1.3772	1.40211	1.37289	1.49832	1.38951	1.53924	NA	NA	NA	NA	NA	NA	NA	NA	NA	NA	NA	NA	NA	NA	NA	NA	NA	NA	NA	NA	NA	NA	1.38406	1.47569	NA	NA	NA	NA	NA	NA	NA	NA
ENSMUSG00000006005	10.0209	9.96028	9.71884	9.9973	9.7354	10.0843	9.7164	9.79867	9.95611	9.68685	9.67291	10.1246	10.1298	10.1247	10.3275	10.1437	10.2971	11.0154	10.4419	10.5849	10.8927	10.6461	10.5729	10.7222	10.7269	10.6352	10.7492	10.6823	10.6349	10.3127	10.2794	10.4884	10.3958	10.4423	10.3406	9.89999	9.86635	9.86647	9.77196	10.1264	10.2561	10.6807	10.7039	10.6948	10.6888	10.3602	10.3929	956.191	-0.057829
ENSMUSG00000006010	8.24277	8.24757	8.31918	8.33544	8.28794	8.29433	8.10732	8.20349	8.20331	8.0502	7.99746	8.45936	8.37755	8.37819	8.57362	8.45037	8.42371	8.57848	8.47767	8.35387	8.38183	8.44389	8.50175	8.31347	8.36043	8.39088	8.41727	8.40934	8.44501	8.14248	8.2016	8.32696	8.35676	8.3319	8.26166	8.26984	8.31169	8.20171	8.08366	8.40503	8.48257	8.47001	8.44249	8.35493	8.42388	8.22368	8.31678	312.519	0.0789011
ENSMUSG00000006014	3.0693	3.10102	3.03389	3.13092	3.05191	3.38376	3.24943	3.33291	3.44073	3.4215	3.36097	3.93865	4.04993	3.8743	4.00084	3.92952	3.93518	3.59685	3.65732	3.84535	3.56396	3.73037	3.73034	4.13298	3.9988	4.23472	4.10677	4.04266	4.24346	3.85533	3.88512	4.09368	4.39111	4.22332	3.78984	3.06807	3.09141	3.32203	3.40773	3.95429	3.95518	3.69984	3.67489	4.12216	4.13096	3.94471	4.13476	8.62912	0.347558
ENSMUSG00000006019	5.24762	5.20053	5.27834	5.31989	5.39238	5.20732	5.33757	5.1772	5.159	5.24358	5.30459	5.6698	5.66387	5.69035	5.58031	5.55378	5.52246	5.153	5.39475	5.35779	5.11238	5.3477	5.1879	4.59412	4.85397	4.62954	4.71269	4.79717	4.73772	5.01906	4.9377	5.38942	4.93805	5.12203	5.00402	5.24216	5.35614	5.2407	5.23572	5.67467	5.55218	5.30185	5.216	4.69254	4.74919	5.11539	5.02137	39.0648	0.506661
ENSMUSG00000006021	6.10553	6.12902	6.14566	6.09315	6.28458	5.96428	6.17644	6.06013	6.23989	6.0699	6.24919	6.25628	6.20585	6.35062	6.02923	6.25014	6.09818	6.38512	6.46932	6.27398	6.26428	6.22019	6.39801	5.41489	5.49062	5.62882	5.53549	5.61531	5.6332	5.67911	5.75148	5.50693	5.63138	5.60231	5.5837	6.12674	6.18886	6.06695	6.18633	6.27091	6.12585	6.37614	6.29416	5.51144	5.59466	5.64584	5.6058	71.1055	0.216644
ENSMUSG00000006024	9.11325	8.99526	9.08062	8.91505	8.99786	9.13765	9.31568	9.20321	9.24924	9.31309	9.29528	9.42188	9.43243	9.37004	9.27681	9.46359	9.38914	9.48461	9.59332	9.52439	9.47608	9.34788	9.55399	9.04387	8.9839	9.04672	9.03789	8.96931	9.00414	9.22203	9.19908	9.03632	9.33039	9.26947	9.15282	9.06305	8.95645	9.21885	9.28587	9.40812	9.37651	9.53411	9.45932	9.02483	9.00378	9.15248	9.25089	520.719	-0.192104
ENSMUSG00000006050	6.94961	7.04193	6.91849	7.07255	6.85974	7.17358	6.95125	7.07663	7.06275	6.99727	7.0203	7.10164	7.11655	7.19314	7.05868	7.12516	7.15206	7.34373	7.42987	7.37251	7.46021	7.40798	7.37133	6.8091	6.71697	6.8315	6.74992	6.93662	7.12468	6.90417	6.97067	7.19697	7.42584	7.48036	7.627	6.97001	6.96615	7.06716	7.02677	7.13711	7.11197	7.38204	7.41318	6.78586	6.93708	7.02394	7.51107	126.255	-0.00549389
ENSMUSG00000006057	3.57719	3.57487	3.58879	3.59294	3.47807	3.5095	3.33195	3.48692	3.50373	3.486	3.41553	3.60384	3.51876	3.49115	3.43372	3.52319	3.57262	4.18468	3.69882	3.65415	4.04666	3.81296	3.64992	4.27994	4.01127	3.99501	4.05371	4.18859	4.1814	3.46674	3.57801	3.67861	3.57318	3.56626	3.46163	3.58028	3.5355	3.44279	3.46842	3.53791	3.50985	3.84589	3.83651	4.0954	4.14123	3.57445	3.53369	12.0894	-0.515015
ENSMUSG00000006058	6.41752	6.51022	6.56171	6.43853	6.43002	6.62704	6.75047	6.56729	6.75415	6.74785	6.62995	6.98976	6.95632	6.99512	6.96034	6.92519	6.9138	6.89463	7.09648	6.83942	6.9397	6.97402	6.94768	6.65333	6.81027	6.62719	6.6531	6.80691	6.57469	6.95629	6.68502	6.72996	6.94767	7.01838	7.10436	6.49649	6.43428	6.64826	6.71065	6.9804	6.93311	6.94351	6.9538	6.69693	6.67823	6.79043	7.02347	89.0248	-0.185377
ENSMUSG00000006095	8.29248	8.3299	8.35441	8.22022	8.3105	8.43976	8.34938	8.34982	8.42831	8.53223	8.53626	8.64271	8.68276	8.70778	8.6087	8.56813	8.63684	8.73334	8.71273	8.66149	8.62308	8.63929	8.68045	8.04231	8.18912	8.1326	8.08799	8.25412	8.2779	8.28585	8.17705	8.19592	8.43819	8.26522	8.36372	8.3256	8.26536	8.37965	8.49894	8.67775	8.60456	8.70252	8.64761	8.12134	8.20667	8.21961	8.35571	315.81	-0.113665
ENSMUSG00000006127	7.65376	7.61816	7.8015	7.82966	7.66918	7.78826	7.73944	7.6641	7.71982	7.56359	7.73075	7.87395	7.60538	7.81624	7.73106	7.81459	7.63189	7.86621	7.78413	7.63045	7.69815	7.59669	7.76315	7.14511	7.26934	7.21872	7.10451	7.22498	7.34306	7.12636	7.17695	7.31963	7.64303	7.36049	7.05911	7.69114	7.74942	7.7306	7.67139	7.76519	7.72585	7.76026	7.686	7.21106	7.22418	7.20765	7.35421	211.164	0.118046
ENSMUSG00000006134	8.04282	8.01138	8.1545	8.04132	8.12464	8.19803	8.26101	8.17776	8.18081	8.05839	8.2451	8.16864	8.28698	8.39038	8.2071	8.26377	8.18398	8.60071	8.33447	8.41173	8.37261	8.12201	8.49193	7.57777	7.74331	7.71307	7.69345	7.69579	7.96523	7.94464	7.73197	7.90331	7.80739	7.54544	7.7396	8.06957	8.08298	8.21227	8.16143	8.282	8.21828	8.44897	8.32885	7.67805	7.78482	7.85997	7.69748	269.963	0.0259883
ENSMUSG00000006143	2.16765	2.13195	2.14764	2.17455	2.15643	NA	NA	NA	NA	NA	NA	1.92186	2.03799	2.01031	1.99498	1.93007	1.95079	2.33536	2.3248	2.39255	2.29959	2.34078	2.42938	NA	NA	NA	NA	NA	NA	3.03673	2.99773	2.98037	3.42873	3.29364	3.52082	2.14908	2.16549	NA	NA	1.99005	1.95862	2.3509	2.35658	NA	NA	3.00494	3.4144	4.47199	0.432544
ENSMUSG00000006154	3.62076	3.7269	3.91547	3.79317	3.79056	3.67351	3.51047	3.66109	3.41876	3.55447	3.37873	2.98545	2.96521	3.16157	3.17056	3.06804	3.2119	3.81933	4.02745	4.0908	4.2534	4.05032	3.88931	3.18991	3.06796	3.0235	3.0837	3.14122	3.24387	3.02829	3.01288	2.98758	3.05363	2.82117	2.94381	3.75438	3.79187	3.61502	3.45065	3.03741	3.15017	3.97919	4.06434	3.09379	3.15626	3.00959	2.93954	13.8919	0.314882
ENSMUSG00000006169	7.32362	7.3103	7.34429	7.37808	7.27901	7.49753	7.60052	7.50514	7.50412	7.37173	7.49193	7.59007	7.47275	7.62323	7.56838	7.6188	7.49437	8.05101	7.74804	7.70084	8.08618	7.52129	7.85959	7.22565	7.19495	7.48109	7.34283	7.24206	7.40134	7.54618	7.47268	7.32027	7.2732	7.29398	7.2549	7.32607	7.32854	7.5344	7.45592	7.56202	7.56052	7.8333	7.82236	7.30056	7.32874	7.44637	7.27403	160.828	0.00387129
ENSMUSG00000006191	6.60612	6.71564	6.72497	6.81416	6.70766	6.77474	6.86831	6.8831	6.88549	6.75496	6.78828	6.9134	6.71356	6.84401	6.72856	6.79609	6.75637	7.2433	6.95335	6.88703	7.01192	6.69177	6.93468	6.28593	6.27671	6.21413	6.30124	6.38116	6.46119	6.18368	6.18525	6.29659	6.2704	6.02209	6.18393	6.68224	6.76091	6.84205	6.80957	6.82365	6.76034	7.02789	6.87946	6.25892	6.3812	6.22184	6.15881	105.435	0.203881
ENSMUSG00000006204	2.85274	2.89544	2.91352	2.92469	2.97812	2.92606	2.88148	2.83418	2.86221	2.80476	2.85562	3.01642	3.08184	3.14196	2.98255	3.07678	3.03341	3.33348	3.42459	3.47294	3.33988	3.65162	3.47208	2.61036	2.61209	2.49571	2.52805	2.54846	2.55988	2.32437	2.45509	2.47017	2.28804	2.5595	2.57609	2.88723	2.9514	2.88057	2.84086	3.08007	3.03091	3.41033	3.48786	2.57272	2.54546	2.41655	2.47454	7.45123	1.05098
ENSMUSG00000006205	13.8254	13.8704	13.8954	13.9756	13.8546	13.8666	13.7536	13.8503	14.0028	13.802	13.8387	13.9144	14.3134	14.2497	14.1148	14.2069	14.3618	14.5405	14.222	14.5148	14.2922	14.665	14.5993	14.343	14.253	14.4872	14.406	13.9832	14.5429	14.1096	14.1959	14.5102	13.9431	13.7943	13.712	13.8637	13.9151	13.8235	13.8812	14.1592	14.2278	14.4258	14.5189	14.3611	14.3107	14.2719	13.8165	15142.3	0.083607
ENSMUSG00000006215	5.51772	5.53342	5.59436	5.51144	5.57528	5.57394	5.72576	5.51944	5.64756	5.69914	5.71912	5.81116	5.74205	5.81736	5.75087	5.84744	5.78334	5.62353	5.87152	5.6889	5.71725	5.71315	5.699	4.85996	5.03736	4.88374	4.83185	4.91557	4.81714	5.61602	5.53529	5.36429	5.40881	5.46538	5.30838	5.5485	5.54336	5.60638	5.68861	5.79019	5.79388	5.72798	5.7098	4.92702	4.85486	5.5052	5.39419	46.6702	-0.017958
ENSMUSG00000006219	NA	NA	NA	NA	NA	NA	NA	NA	NA	NA	NA	NA	NA	NA	NA	NA	NA	NA	NA	NA	NA	NA	NA	NA	NA	NA	NA	NA	NA	1.83377	1.77734	1.7318	1.9298	1.93959	1.94225	NA	NA	NA	NA	NA	NA	NA	NA	NA	NA	1.78097	1.93721	NA	NA
ENSMUSG00000006235	NA	NA	NA	NA	NA	NA	NA	NA	NA	NA	NA	NA	NA	NA	NA	NA	NA	NA	NA	NA	NA	NA	NA	NA	NA	NA	NA	NA	NA	1.73894	1.76681	1.64857	1.57056	1.57462	1.59687	NA	NA	NA	NA	NA	NA	NA	NA	NA	NA	1.71811	1.58068	NA	NA
ENSMUSG00000006241	3.183	3.239	3.21608	3.24363	3.24503	3.02301	2.988	3.05176	3.12184	3.00282	3.02811	3.47578	3.38328	3.41631	3.50425	3.44037	3.41022	3.55469	3.5137	3.5435	3.46163	3.58601	3.54139	3.08168	3.09732	3.03095	2.99723	2.9971	3.07455	3.16584	3.24367	3.05932	3.29944	3.20856	3.08023	3.21269	3.24433	3.02092	3.05093	3.42512	3.45161	3.5373	3.52968	3.06998	3.02296	3.15628	3.19608	9.35586	0.426096
ENSMUSG00000006262	8.26518	8.05655	8.0556	8.15655	8.12325	8.12879	7.86012	8.03641	7.97468	7.71451	7.96342	8.15548	8.08687	8.37404	8.35447	8.16184	8.21302	8.34249	8.2639	8.19941	8.27072	8.128	8.22248	7.82114	7.98264	8.09012	7.9367	8.08764	8.11549	8.0082	8.04445	7.98867	8.24795	7.92433	7.88355	8.12577	8.1399	8.00844	7.8842	8.20546	8.24311	8.2686	8.20707	7.96463	8.04661	8.01377	8.01861	281.593	0.018529
ENSMUSG00000006270	1.6609	1.71648	1.70283	1.63597	1.64642	NA	NA	NA	NA	NA	NA	NA	NA	NA	NA	NA	NA	NA	NA	NA	NA	NA	NA	NA	NA	NA	NA	NA	NA	1.54261	1.59111	1.69131	1.61369	1.72226	1.78696	1.6934	1.64119	NA	NA	NA	NA	NA	NA	NA	NA	1.60834	1.70764	3.25672	-2.67699
ENSMUSG00000006273	9.98953	9.85872	9.80076	9.86134	9.68533	10.175	10.3549	10.307	10.3007	10.1149	9.97959	10.6336	10.1382	10.1315	10.3529	10.4663	10.261	10.7906	10.9039	10.7316	11.0796	10.5747	10.7855	10.3489	10.3496	10.5148	10.4516	10.4351	10.0833	10.6331	10.5475	10.2649	10.417	10.23	10.2454	9.883	9.77334	10.279	10.1317	10.3011	10.3601	10.8087	10.8133	10.4044	10.3233	10.4818	10.2975	921.351	-0.187708
ENSMUSG00000006276	7.02454	7.01197	6.99121	6.89759	6.96408	7.11415	7.22058	7.14317	7.16014	7.22782	7.23309	7.19213	7.27653	7.25375	7.28937	7.3125	7.27296	7.79947	7.52616	7.68151	7.7365	7.42398	7.67189	6.84515	6.80321	6.75644	6.89438	6.72554	6.74823	7.22224	7.12231	7.13825	6.99927	6.91977	6.80021	7.00924	6.93083	7.1593	7.20702	7.2408	7.29161	7.66905	7.61079	6.8016	6.78938	7.16093	6.90642	126.24	-0.191327
ENSMUSG00000006281	5.30125	5.36885	5.33801	5.3266	5.38832	5.3291	5.30752	5.43618	5.49629	5.42261	5.43799	5.45032	5.63741	5.55645	5.44621	5.6298	5.63691	5.79132	5.51203	5.64974	5.62214	5.69085	5.56093	5.35973	5.39971	5.5871	5.56214	5.56171	5.66649	5.44093	5.6676	5.92346	6.05175	6.14436	6.22873	5.33603	5.35746	5.3576	5.4523	5.54806	5.57097	5.65103	5.62464	5.44885	5.59678	5.67733	6.14161	40.5923	0.0984686
ENSMUSG00000006288	6.26077	6.34186	6.51691	6.38279	6.439	6.26019	6.39393	6.41576	6.34328	6.43586	6.5722	6.39435	6.67715	6.63836	6.41295	6.57325	6.62851	6.54554	6.58856	6.67179	6.56522	6.55753	6.68964	5.69239	5.68992	5.62236	5.55593	5.83865	5.85655	6.20972	5.98316	6.2904	6.21277	6.16195	6.34538	6.37318	6.4109	6.35663	6.45045	6.56995	6.53824	6.60196	6.60413	5.66822	5.75038	6.16109	6.24003	84.1398	0.0949897
ENSMUSG00000006289	6.92433	7.16798	7.19421	7.13411	7.19226	6.90773	7.1297	7.07699	6.98336	7.14359	7.16494	7.2286	7.27536	7.28374	7.05854	7.16507	7.07181	7.15083	7.19466	7.1685	7.08124	6.91626	7.25252	6.12422	6.24741	6.16714	6.17751	6.2519	6.56611	6.30348	6.2386	6.27988	6.15842	6.10114	6.27551	7.09551	7.16319	7.03814	7.0973	7.26257	7.09847	7.17133	7.08334	6.17959	6.33184	6.27399	6.17836	140.248	0.14675
ENSMUSG00000006299	8.9869	9.0826	9.17593	9.10838	9.00152	9.0797	9.30151	9.14023	9.08734	9.15343	9.33967	9.2532	9.26209	9.32342	9.0811	9.15146	9.11682	9.15295	9.31134	9.30815	9.21892	9.06464	9.32834	8.48715	8.45145	8.49543	8.36613	8.52527	8.49034	8.80831	8.70848	8.73533	8.88442	8.81562	9.02153	9.08181	9.05495	9.17381	9.19348	9.27957	9.11646	9.25748	9.20397	8.47801	8.46058	8.75071	8.90719	539.523	-0.0531129
ENSMUSG00000006301	9.50293	9.55119	9.66684	9.61445	9.75724	9.61228	9.62491	9.5484	9.61107	9.69572	9.73163	9.72626	10.0561	10.0056	9.88132	9.89889	10.0097	9.90122	9.90512	10.0479	9.75809	10.187	10.0417	9.52678	9.56747	9.63916	9.55072	9.66562	9.79194	9.43644	9.61191	9.93961	10.0382	10.0563	10.1873	9.57366	9.68584	9.5952	9.67947	9.92934	9.92996	9.9514	9.99559	9.5778	9.66943	9.66265	10.0939	789.235	0.1943
ENSMUSG00000006304	9.46758	9.35848	9.30434	9.40996	9.27875	9.50029	9.42781	9.39978	9.45983	9.33521	9.29973	9.72708	9.49558	9.56749	9.75496	9.58663	9.63022	10.0138	9.845	9.73894	9.9592	9.61008	9.773	9.47712	9.47934	9.51742	9.57276	9.61686	9.50091	9.55561	9.49393	9.37836	9.85719	9.7003	9.58308	9.3768	9.34436	9.44263	9.36492	9.59672	9.65727	9.86591	9.78076	9.49129	9.56351	9.47596	9.71352	660.947	-0.0589048
ENSMUSG00000006307	5.87103	5.89122	5.89746	5.91629	5.99824	5.83956	5.94224	6.05366	5.85211	6.1543	6.20705	6.22266	6.13494	6.18161	6.13209	6.26006	6.01718	5.86354	5.95539	5.6211	5.96595	5.81647	5.63784	5.2622	5.40313	5.34227	5.37132	5.30049	5.44029	5.80614	5.57268	5.62788	5.10247	5.05691	5.04012	5.88657	5.95727	5.94515	6.07115	6.17974	6.13644	5.81334	5.80676	5.33587	5.3707	5.6689	5.0665	60.2813	0.249973
ENSMUSG00000006315	7.9915	8.07936	8.2574	8.11918	8.30549	8.14706	8.06841	8.16508	8.08891	8.18321	8.10281	8.34905	8.58494	8.38564	8.38156	8.42852	8.57107	8.35922	8.50416	8.68066	8.31858	8.81763	8.61485	8.43158	8.30965	8.34533	8.30905	8.30445	8.30521	8.35945	8.40229	8.49809	8.44193	8.48828	8.69385	8.10942	8.21233	8.12685	8.12498	8.43987	8.46038	8.51468	8.58369	8.36219	8.30624	8.41994	8.54135	286.168	0.202133
ENSMUSG00000006333	8.78665	8.92381	9.05593	8.91423	8.96615	8.81464	8.82577	8.9841	8.83994	8.88578	9.07896	9.08864	9.18351	9.59681	9.12231	9.12487	9.30927	9.48006	9.38723	9.20311	9.19396	9.31767	9.33385	8.3216	8.45505	8.35401	8.42516	8.62673	8.53249	9.1703	8.98503	9.1271	8.6131	8.53311	8.87255	8.92213	8.94019	8.87484	8.93489	9.28965	9.18548	9.3568	9.28182	8.37689	8.52813	9.09414	8.67292	489.531	0.0229909
ENSMUSG00000006335	5.63745	5.58624	5.64263	5.60978	5.72198	5.88944	6.03128	5.95967	5.97675	6.00417	5.97153	6.05899	6.10365	6.1388	6.1577	6.05503	6.2292	6.20974	6.21641	6.13887	6.2386	6.12062	6.17473	5.38275	5.45469	5.36554	5.36246	5.56825	5.56318	5.93626	5.72123	5.85225	5.85601	5.82328	5.87141	5.6221	5.66588	5.96013	5.98415	6.10048	6.14731	6.18834	6.17798	5.40099	5.49796	5.83658	5.85023	49.7547	0.177756
ENSMUSG00000006342	5.20658	5.37152	5.17294	5.25003	5.23649	5.28203	5.63139	5.34707	5.43225	5.43167	5.288	5.77718	6.13949	5.66057	5.9562	6.05322	6.00855	6.19009	6.36544	6.74469	6.22681	6.8498	6.49454	6.56518	6.30001	6.15626	6.42002	5.81627	6.06794	6.58411	6.72204	6.43445	6.38699	6.49844	6.65315	5.25035	5.24326	5.42016	5.38397	5.85908	6.00599	6.43341	6.52372	6.34048	6.10141	6.5802	6.51286	38.3904	-0.0470988
ENSMUSG00000006344	NA	NA	NA	NA	NA	1.98306	1.996	1.94675	1.90351	1.97467	1.96032	2.36932	2.43588	2.34988	2.29334	2.3652	2.4434	2.82547	2.76289	2.95318	2.76333	3.20883	2.94667	2.92616	2.91357	3.12713	2.95533	3.32252	3.20064	4.69219	4.7176	4.81691	6.51069	6.42874	6.42125	NA	NA	1.97527	1.94617	2.38503	2.36731	2.84718	2.97294	2.98895	3.1595	4.74223	6.45356	NA	NA
ENSMUSG00000006345	5.32063	5.33489	5.34398	5.22139	5.34258	5.07171	5.09162	5.14687	5.13683	5.04109	5.20844	5.42816	5.71152	5.62165	5.48157	5.58574	5.54866	5.45244	5.42407	5.54409	5.30329	5.79141	5.59249	5.22764	5.24049	5.22291	5.27891	4.78487	5.40714	5.33481	5.27144	5.62008	5.36034	5.41665	5.14609	5.33317	5.28199	5.1034	5.12879	5.58711	5.53866	5.47353	5.5624	5.23035	5.15697	5.40877	5.3077	39.7222	-0.213299
ENSMUSG00000006356	9.12194	9.19777	9.34421	9.07191	9.08949	9.19014	9.40247	9.24642	9.30382	9.51241	9.5174	9.34745	9.54498	9.55405	9.256	9.37345	9.43733	9.69044	9.61642	9.58028	9.48187	9.57872	9.65667	8.56431	8.79141	8.73436	8.50917	8.81063	8.83663	9.11258	8.99378	9.40997	9.71381	9.65273	9.69823	9.22131	9.0807	9.27968	9.44454	9.48216	9.35559	9.62905	9.57242	8.69669	8.71881	9.17211	9.68826	577.461	-0.258658
ENSMUSG00000006360	4.8022	4.85007	4.82881	4.77672	4.83227	4.74463	5.00884	4.7197	4.81236	4.79509	4.91608	4.94484	5.0943	5.15593	4.88354	4.9792	5.13458	4.98574	5.05094	5.10381	4.91866	5.09449	5.27013	4.13321	4.16401	4.26907	4.06036	4.09296	4.30596	4.67479	4.86311	5.02759	5.32106	5.44987	5.53245	4.82703	4.8045	4.82439	4.84118	5.06502	4.99911	5.04683	5.09443	4.18876	4.15309	4.85516	5.43446	28.1863	-0.12117
ENSMUSG00000006362	2.59436	2.58663	2.56116	2.6028	2.59332	3.06155	3.09539	3.28789	3.09363	3.19425	3.06199	4.13241	3.88754	3.85576	3.88386	4.00729	3.94487	4.10568	4.19137	4.06598	4.14157	4.11915	4.04558	3.53721	3.41911	3.46123	3.45098	3.58643	3.503	3.96666	4.18249	3.76776	3.65541	3.58168	3.70384	2.58072	2.59806	3.14828	3.11662	3.95857	3.94534	4.12101	4.1021	3.47252	3.51347	3.9723	3.64698	6.03657	0.34975
ENSMUSG00000006369	8.7952	8.9117	9.17618	9.02335	9.21217	8.79175	8.89184	8.93268	8.90894	9.06971	9.27388	8.67956	9.46188	9.25533	8.94911	9.13658	9.33679	9.27579	9.1604	9.52797	9.11594	9.58985	9.66199	9.00235	9.02077	9.17409	9.17322	8.49711	9.08662	8.9499	9.17158	9.58162	8.27619	8.507	8.7371	8.96103	9.11776	8.87209	9.08418	9.13226	9.14083	9.32139	9.45592	9.06574	8.91898	9.23436	8.50676	527.448	0.266141
ENSMUSG00000006373	9.32089	9.35013	9.21146	9.08045	9.18755	9.35561	9.63785	9.43984	9.48312	9.68274	9.42311	9.59543	9.83187	9.39858	9.41676	9.74192	9.6969	9.84095	10.0798	10.2576	9.98416	10.2287	10.168	9.70576	9.48779	9.37741	9.51486	9.36293	9.30393	9.79419	9.96179	9.6967	9.72299	10.049	10.0477	9.29416	9.134	9.47777	9.52966	9.60863	9.61853	10.0595	10.127	9.52365	9.39391	9.81756	9.93987	603.868	-0.282947
ENSMUSG00000006378	6.76495	6.84946	6.97854	7.00502	6.89913	6.7583	7.00875	6.84461	6.8115	6.85292	7.07769	6.64782	6.80035	6.94605	6.77197	6.76274	6.79034	6.61229	6.83011	6.76115	6.61165	6.61189	6.88912	5.7831	5.85126	5.96127	5.88639	5.83731	6.11803	6.23134	6.16244	6.41358	6.24472	6.12553	6.17913	6.86432	6.95207	6.87055	6.91404	6.79807	6.77502	6.73452	6.70422	5.86521	5.94724	6.26912	6.18313	120.122	0.210033
ENSMUSG00000006386	NA	NA	NA	NA	NA	NA	NA	NA	NA	NA	NA	NA	NA	NA	NA	NA	NA	2.14958	2.2143	2.19849	2.07761	2.20749	2.21735	1.8881	1.78417	1.8325	1.85069	1.80572	1.88626	NA	NA	NA	NA	NA	NA	NA	NA	NA	NA	NA	NA	2.18746	2.16748	1.83492	1.84756	NA	NA	NA	NA
ENSMUSG00000006390	7.08285	7.08405	7.09948	7.10886	7.28814	6.92626	7.06429	6.94516	6.87747	6.85457	7.03707	7.01078	7.31821	7.44802	7.07404	7.27502	7.3732	6.99286	7.18925	7.59868	7.00763	7.61489	7.40764	6.83878	6.77358	6.77044	6.84861	6.95797	7.12912	7.2579	7.48084	7.3722	7.55763	7.65311	7.81336	7.08879	7.1985	6.97857	6.92304	7.25901	7.24075	7.26026	7.34339	6.79427	6.97857	7.37031	7.6747	140.665	0.275154
ENSMUSG00000006392	6.12727	6.00016	5.94315	5.86073	5.96635	6.20957	6.2879	6.29358	6.26105	6.30059	6.21472	6.37924	6.43713	6.4349	6.2722	6.43396	6.49561	6.34718	6.37396	6.3627	6.30555	6.26615	6.36374	6.0614	5.99049	5.95122	5.984	6.1044	5.94897	6.07455	6.22821	5.97455	6.38453	6.33841	6.38384	6.02353	5.91354	6.26368	6.25879	6.41709	6.40059	6.36128	6.31181	6.00104	6.01245	6.09244	6.36893	63.624	-0.375065
ENSMUSG00000006395	3.22798	3.33232	3.27021	3.21116	3.26181	3.14082	3.12706	3.09144	3.20551	3.14048	3.18006	3.42646	3.39439	3.4319	3.3323	3.36222	3.34873	2.93185	3.0379	3.22666	2.89745	3.13193	3.14867	2.48454	2.42751	2.36465	2.54087	2.46459	2.37951	3.05711	3.22647	3.13694	3.31819	3.36401	3.28566	3.27684	3.23648	3.11977	3.17535	3.41758	3.34775	3.06547	3.05935	2.42556	2.46166	3.14017	3.32262	9.64532	-0.556981
ENSMUSG00000006403	4.45472	4.4808	4.42367	4.41203	4.43689	4.64922	4.76303	4.80325	4.78555	4.84259	4.72166	4.94675	5.09436	5.01704	4.96724	5.00811	5.05695	5.16799	5.2593	5.56027	5.3453	5.6541	5.51812	4.86935	4.9406	4.9448	5.09866	5.33575	5.37506	5.71977	5.8307	5.89844	7.54864	7.3425	7.79524	4.45306	4.42446	4.7385	4.78327	5.01938	5.01077	5.32919	5.50584	4.91825	5.26982	5.8163	7.56213	21.7799	-0.194431
ENSMUSG00000006411	NA	NA	NA	NA	NA	2.30944	2.24939	2.30559	2.30079	2.28499	2.26825	2.29886	2.43134	2.32353	2.35012	2.33936	2.34673	2.35929	2.40439	2.59416	2.49211	2.4193	2.56212	NA	NA	NA	NA	NA	NA	2.66912	2.56103	2.65047	2.7567	2.77104	2.73234	NA	NA	2.28814	2.28468	2.35124	2.34541	2.45261	2.49118	NA	NA	2.62688	2.75336	NA	NA
ENSMUSG00000006412	7.19754	7.13474	7.08531	7.15542	7.00542	7.12128	7.28815	7.23106	7.49166	7.43668	7.27073	7.52533	7.68171	7.47312	7.62524	7.51303	7.59758	7.79448	7.64271	7.72662	7.76599	7.7628	7.76049	7.48917	7.45731	7.47129	7.39107	7.41164	7.56746	7.5905	7.69245	7.5375	7.721	7.73561	7.72344	7.1392	7.08042	7.2135	7.39969	7.56005	7.57862	7.72127	7.76309	7.47259	7.45672	7.60682	7.72668	139.469	-0.14297
ENSMUSG00000006418	6.90714	6.90425	6.92369	6.97762	6.90716	6.98722	6.86535	7.00367	6.89979	7.0801	7.17407	7.1208	7.28846	7.46663	7.22885	7.18779	7.26645	7.11036	7.12175	7.0591	7.02104	7.13296	7.00765	6.78902	6.67974	6.61398	6.63663	6.79462	6.79484	6.89529	6.89084	6.92222	6.96084	7.04585	7.07172	6.9117	6.94239	6.95208	7.05132	7.29196	7.22769	7.09707	7.05388	6.69425	6.74203	6.90278	7.02613	121.575	0.0752587
ENSMUSG00000006423	5.4583	5.26907	5.44423	5.37115	5.52759	5.77824	5.75685	5.7135	5.75357	5.83837	5.84014	5.72693	6.05566	5.84337	6.01505	5.8347	5.976	6.1356	5.78274	5.95188	6.03834	5.89928	6.03253	5.27855	5.24	5.38694	5.36473	5.20587	5.58054	5.48447	5.57253	5.62635	5.52441	5.86503	5.61745	5.39053	5.44937	5.74953	5.81069	5.87532	5.94192	5.95674	5.99005	5.30183	5.38371	5.56112	5.66897	42.7209	0.246789
ENSMUSG00000006435	4.43004	4.3134	4.25154	4.21456	4.28017	5.04121	5.11327	5.04804	4.96834	5.17935	4.83273	5.55586	5.51781	5.04847	5.29545	5.54658	5.44717	6.00343	6.21532	6.12581	6.31835	6.43229	6.19371	5.78256	5.66117	5.69315	5.79741	5.7892	5.42418	6.19606	6.40594	6.06142	5.97305	5.90166	5.89227	4.33166	4.24737	5.06751	4.99347	5.37405	5.42973	6.11485	6.31478	5.71229	5.67026	6.22114	5.92232	19.9594	-0.647599
ENSMUSG00000006442	7.23883	7.3195	7.43321	7.31233	7.49294	7.44043	7.41783	7.52639	7.08456	7.36907	7.38408	7.27736	7.25668	7.39114	7.22046	7.38395	7.25156	7.31437	7.75124	7.66866	7.45475	7.43485	7.56773	6.62686	6.74914	6.86952	6.8033	6.83143	6.85615	7.03774	7.29724	7.0219	7.18494	7.21046	7.47797	7.33051	7.40263	7.46155	7.27924	7.30839	7.28532	7.57809	7.48578	6.74851	6.83029	7.11896	7.29112	164.824	0.168314
ENSMUSG00000006445	NA	NA	NA	NA	NA	NA	NA	NA	NA	NA	NA	NA	NA	NA	NA	NA	NA	NA	NA	NA	NA	NA	NA	NA	NA	NA	NA	NA	NA	2.29824	2.4301	2.30427	2.6226	2.66657	2.67613	NA	NA	NA	NA	NA	NA	NA	NA	NA	NA	2.3442	2.6551	NA	NA
ENSMUSG00000006456	4.73533	4.90478	4.8354	4.83527	4.87202	4.99609	5.12482	5.13229	4.96291	5.08755	5.06953	5.30087	5.27687	5.2076	5.53028	5.17496	5.08855	6.02487	5.80905	5.99192	6.22906	5.62479	5.98987	4.5377	4.78268	4.86326	4.74763	4.65652	4.82133	5.14047	5.04155	5.03455	4.71018	4.57351	5.06756	4.82517	4.85364	5.0844	5.04	5.26178	5.2646	5.94195	5.94791	4.72788	4.74183	5.07219	4.78375	28.6861	0.147744
ENSMUSG00000006463	4.13732	4.16016	4.21187	4.10692	4.25611	3.84168	3.80655	3.84838	3.88888	3.84997	3.98039	4.14483	4.29134	4.20525	4.37054	4.29211	4.17125	4.33587	4.60783	4.42745	4.42598	4.53216	4.59052	3.86749	3.81862	3.72324	3.89099	3.63262	3.92654	4.10965	4.13115	4.18775	4.08174	4.13087	4.19314	4.16978	4.18151	3.8322	3.90641	4.21381	4.27797	4.45705	4.51622	3.80312	3.81672	4.14285	4.13525	17.9234	0.114536
ENSMUSG00000006464	6.09744	6.1796	6.29986	6.15318	6.23285	6.18213	6.26089	6.24078	5.99981	6.28129	6.27102	6.52403	6.46832	6.43906	6.3675	6.49452	6.38864	6.36069	6.48477	6.28551	6.38002	6.39823	6.31769	5.58674	5.47246	5.47199	5.48857	5.42051	5.51725	5.8926	5.69275	5.88362	6.00267	5.68403	5.96337	6.1923	6.19301	6.22793	6.18404	6.47714	6.41689	6.37699	6.36531	5.51039	5.47544	5.82299	5.88336	73.2951	-0.00416004
ENSMUSG00000006471	2.29214	2.33413	2.31127	2.36301	2.38779	NA	NA	NA	NA	NA	NA	2.5991	2.62383	2.57313	2.53862	2.57242	2.55806	2.66358	2.57871	2.61805	2.69367	2.64637	2.63184	NA	NA	NA	NA	NA	NA	NA	NA	NA	NA	NA	NA	2.31251	2.3754	NA	NA	2.59869	2.55637	2.62012	2.65729	NA	NA	NA	NA	5.02492	1.5286
ENSMUSG00000006476	6.86027	6.80504	6.71226	6.79386	6.69364	6.66566	6.84685	6.67618	6.90707	6.90857	6.66186	7.33208	7.21326	6.87288	7.12369	7.21103	7.09687	7.33802	7.73476	7.69992	7.60319	7.80287	7.57388	7.35937	7.23557	7.53341	7.43966	7.32912	7.18197	7.69606	7.83093	7.47825	7.67721	7.82629	7.83106	6.79252	6.74375	6.72957	6.82584	7.13941	7.14386	7.5909	7.65998	7.37612	7.31692	7.66841	7.77819	109.982	-0.133443
ENSMUSG00000006494	7.04081	6.8578	7.01079	7.0438	6.99228	7.06337	7.01465	7.0799	6.9364	6.85522	6.89788	7.33449	7.29039	7.31127	7.39881	7.33837	7.24453	7.43917	7.57117	7.40112	7.49296	7.35729	7.49742	7.14807	7.22584	7.11352	7.24294	7.37923	7.17741	7.30248	7.18095	7.37217	7.51994	7.49079	7.44609	6.9698	7.01804	7.05264	6.8965	7.31205	7.32723	7.47049	7.44922	7.16248	7.26653	7.2852	7.48561	127.466	0.109491
ENSMUSG00000006498	7.23019	7.29687	7.3539	7.24515	7.43262	7.57901	7.69858	7.58612	7.51379	7.54804	7.89561	7.39364	7.52677	7.62562	7.4706	7.51894	7.30097	7.61593	7.24083	7.29398	7.39412	6.97034	7.43461	6.3221	6.27817	6.34963	6.3489	6.25622	6.67592	6.85874	7.04524	6.85937	6.99064	6.8654	7.07201	7.29365	7.33888	7.62124	7.65248	7.51534	7.43017	7.38358	7.26636	6.31664	6.42701	6.92112	6.97602	159.185	0.115083
ENSMUSG00000006517	7.61424	7.60554	7.78709	7.71338	7.66047	7.71643	7.91102	7.65669	7.61894	7.71062	7.88981	7.67353	7.46345	7.91284	7.63762	7.63965	7.48125	7.28823	7.2963	7.06122	7.14189	7.03046	7.22176	6.46137	6.77734	6.67086	6.55751	6.67413	6.98835	6.34173	6.01415	6.20638	5.50599	5.51274	5.48322	7.66896	7.68692	7.76138	7.73979	7.68327	7.58617	7.21525	7.13137	6.63652	6.74	6.18742	5.50065	205.134	0.0288069
ENSMUSG00000006519	5.82356	5.76781	5.92287	5.85158	5.93343	5.61041	5.72026	5.8141	5.69996	5.90605	5.88617	5.79386	6.00155	6.01881	5.8835	6.01384	5.82802	5.812	5.94721	6.00992	5.73474	6.12945	6.10329	5.20587	5.53367	5.2283	5.3306	5.24812	5.28431	6.01083	6.06161	6.19757	6.65165	6.76131	6.82437	5.83808	5.89251	5.71492	5.83072	5.93807	5.90845	5.92304	5.98916	5.32261	5.28768	6.09	6.74578	58.0747	0.189012
ENSMUSG00000006522	11.8556	11.8342	11.9695	11.9094	11.8982	11.8018	11.7859	11.6675	11.7824	11.6667	12.0877	11.7532	12.3707	12.2053	12.1474	12.1445	12.2449	12.1501	11.7529	12.4425	11.894	12.6254	12.4229	12.415	12.224	12.0947	12.1559	11.4445	12.02	12.1941	12.0748	12.6181	11.8818	11.7934	11.5872	11.8864	11.9038	11.7517	11.8456	12.1097	12.1789	12.1152	12.3141	12.2446	11.8734	12.2957	11.7542	3808.58	0.0250846
ENSMUSG00000006526	5.64339	5.71092	5.73612	5.60267	5.76405	5.58379	5.76653	5.81344	5.70634	5.87368	5.84285	6.04275	6.14357	6.22679	6.13428	6.19318	6.11678	6.18318	6.12329	6.24678	6.11857	6.46325	6.20684	6.11605	6.06031	6.21201	6.01599	6.09642	6.10596	6.20756	6.26349	6.22326	5.86202	6.29174	6.02907	5.69681	5.68336	5.72125	5.80762	6.1377	6.14808	6.18442	6.26289	6.12946	6.07279	6.23144	6.06094	51.6514	-0.0344633
ENSMUSG00000006527	5.42129	5.42099	5.30652	5.37182	5.30873	5.57739	5.4604	5.47194	5.56467	5.53445	5.48404	6.12768	5.81515	5.70143	6.02123	5.98939	5.85095	6.03473	6.06004	5.87986	6.04773	5.91827	5.90865	5.94392	5.98437	6.08732	5.96259	5.99863	5.61248	6.22148	6.21755	6.08415	6.28532	6.18686	6.07588	5.38293	5.34027	5.50324	5.52772	5.88142	5.95386	5.99155	5.95822	6.0052	5.8579	6.17439	6.18269	41.5929	-0.192876
ENSMUSG00000006567	5.89865	5.95102	5.85221	5.85775	5.83941	5.75114	5.79886	5.74764	5.71081	5.72241	5.78957	5.86672	5.86317	5.86552	5.7237	5.82516	5.7517	5.74755	5.58564	5.83367	5.56351	5.70542	5.71211	5.21959	5.2986	5.24851	5.27644	5.20307	5.26814	5.5759	5.64951	5.87155	5.78423	5.8428	6.07824	5.90063	5.84858	5.76588	5.74093	5.86514	5.76685	5.72228	5.66035	5.25557	5.24922	5.69899	5.90176	59.1287	-0.186882
ENSMUSG00000006575	7.25964	7.15383	7.14645	7.06337	7.15873	7.27687	7.4293	7.4187	7.43281	7.5121	7.22807	7.83926	7.65153	7.60245	7.52013	7.70658	7.54031	7.54488	7.83752	7.65051	7.7588	7.81639	7.79991	7.37989	7.48644	7.53935	7.45541	7.58382	7.32771	7.82138	7.66388	7.67348	7.61288	7.77067	7.78371	7.18664	7.11105	7.37496	7.39099	7.69774	7.58901	7.67764	7.7917	7.46856	7.45565	7.71958	7.72242	143.031	-0.176904
ENSMUSG00000006576	6.84132	6.86032	6.76901	6.75558	6.81579	7.06867	7.12646	7.06278	7.10178	7.18278	7.0088	7.4042	7.47167	7.07574	7.37148	7.36421	7.42674	7.58366	7.7313	7.73492	7.71236	7.88558	7.6546	7.55716	7.53879	7.51446	7.54321	7.49774	7.44977	7.57176	7.74866	7.52216	7.63807	7.73751	7.82022	6.82355	6.78568	7.08597	7.09779	7.3172	7.38748	7.6833	7.75085	7.5368	7.49691	7.61419	7.73194	112.237	-0.0955385
ENSMUSG00000006585	NA	NA	NA	NA	NA	NA	NA	NA	NA	NA	NA	1.99975	2.09022	2.04782	2.01572	2.09972	2.07201	1.63761	1.65665	1.60382	1.55806	1.72226	1.73129	NA	NA	NA	NA	NA	NA	2.08518	1.97174	2.06457	2.02026	1.99428	2.03696	NA	NA	NA	NA	2.04593	2.06248	1.6327	1.67054	NA	NA	2.0405	2.01717	NA	NA
ENSMUSG00000006586	5.1095	5.13197	5.0725	5.02653	4.9438	5.25854	5.32126	5.38602	5.28505	5.29573	5.21138	5.51235	5.43548	5.13964	5.51361	5.51496	5.38026	5.91994	6.08994	6.11964	6.10518	5.83979	6.00505	5.73601	5.49966	5.7113	5.69552	5.60974	5.43734	5.95764	6.02995	5.59738	5.39518	5.50303	5.40701	5.10466	4.98516	5.32194	5.26405	5.36249	5.46961	6.04317	5.98334	5.64899	5.58087	5.86166	5.43507	33.7855	-0.622418
ENSMUSG00000006589	6.676	6.52501	6.78814	6.66474	6.67489	6.62721	6.57563	6.59613	6.63932	6.72878	6.71793	6.76336	6.92076	6.82536	6.6448	6.77675	6.67757	6.79342	6.96221	6.85299	6.89402	6.99802	6.9402	6.27735	6.25467	6.40048	6.19176	6.3844	6.31958	6.62424	6.48536	6.64951	6.84821	7.06704	7.21317	6.66305	6.66982	6.59966	6.69535	6.83649	6.69971	6.86954	6.94408	6.31084	6.29858	6.58637	7.04281	101.982	0.00163183
ENSMUSG00000006599	5.77929	5.89294	5.7743	5.88007	5.7234	6.01093	5.98572	5.95712	5.84923	5.89359	5.80709	6.14309	5.92727	6.16441	6.2348	6.08003	5.96471	6.28163	6.30693	6.20348	6.40026	6.35345	6.28644	6.24212	6.22189	6.01342	6.18055	6.20617	5.90351	6.24057	6.48238	6.3108	6.02703	6.17158	6.10523	5.81551	5.80174	5.98459	5.84997	6.07825	6.09318	6.26401	6.34672	6.15914	6.09674	6.34458	6.10128	56.6985	-0.0509262
ENSMUSG00000006611	6.07778	6.25846	6.23251	6.07717	6.22945	5.89516	5.62904	5.76915	5.89266	5.80589	5.82196	6.22308	6.35991	6.29742	6.36519	6.32036	6.36923	6.17158	6.41964	6.61066	6.00936	6.67837	6.42019	6.31372	6.23449	6.40767	6.20595	6.30671	6.51664	6.30334	6.4867	6.50983	7.12853	7.16253	7.03451	6.18958	6.15331	5.76445	5.84017	6.29347	6.35159	6.40062	6.3693	6.31863	6.3431	6.43329	7.10853	72.5368	-0.109165
ENSMUSG00000006638	4.3952	4.44148	4.45365	4.3934	4.48306	4.32647	4.27	4.26053	4.22496	4.27642	4.3207	4.54164	4.5669	4.6954	4.53032	4.55642	4.64162	4.41112	4.41637	4.78129	4.41142	4.64446	4.44857	4.05443	3.8731	3.89646	3.86667	3.89991	4.06457	3.43366	3.54349	3.71029	3.68094	3.59528	3.80093	4.43011	4.43823	4.28567	4.27403	4.60131	4.57612	4.53626	4.50149	3.94133	3.94372	3.56248	3.69239	21.5118	0.0663826
ENSMUSG00000006641	5.60445	5.78663	5.75324	5.52784	5.80936	5.36085	5.5476	5.61941	5.59466	5.65741	5.66251	5.94363	6.12615	5.96364	5.91656	6.04347	5.95624	5.92982	5.97249	6.16256	6.01542	6.32103	6.20405	5.63771	5.46664	5.46345	5.57374	5.35185	5.50209	5.9539	6.0694	6.02229	5.43336	5.71735	5.78282	5.71477	5.6686	5.50928	5.63819	6.01114	5.97209	6.02162	6.18017	5.5226	5.47589	6.0152	5.64451	52.2437	-0.143547
ENSMUSG00000006649	4.89867	4.7813	4.96862	4.90919	4.88231	4.55551	4.64138	4.56369	4.58154	4.71009	4.70294	4.6424	4.58912	4.62717	4.627	4.68379	4.77573	5.05598	5.16561	4.87446	5.04894	5.14781	5.06613	4.43374	4.42563	4.57162	4.5511	4.29577	4.48372	4.92717	4.82777	5.07507	4.99114	4.73904	4.54628	4.88286	4.89575	4.58686	4.66486	4.61957	4.6955	5.03202	5.08763	4.477	4.44353	4.94334	4.75882	29.7239	0.0511017
ENSMUSG00000006651	12.2488	12.3718	12.3903	12.206	12.444	12.2667	12.5165	12.3742	12.3711	12.6823	12.4971	12.6333	13.0337	12.7033	12.6216	12.7363	12.8918	12.7954	13.0687	13.2459	12.9084	13.4217	13.221	12.9977	12.833	12.9425	12.9968	12.5636	12.7691	13.0427	13.3571	13.1355	12.8254	13.0385	13.0532	12.337	12.325	12.3858	12.5168	12.7901	12.7499	13.0367	13.1837	12.9244	12.7765	13.1784	12.9724	5177.87	-0.0109678
ENSMUSG00000006673	8.65779	8.64074	8.62241	8.71442	8.67031	8.71841	8.62368	8.6441	8.72252	8.76511	8.73828	9.00823	9.07509	8.93451	8.99302	9.04506	8.9841	9.14294	9.15669	9.15352	9.15799	9.07249	9.16477	8.68718	8.67274	8.7362	8.71833	8.66254	8.5731	8.77376	8.7738	8.82712	8.89972	8.79245	8.64439	8.64031	8.69237	8.66206	8.74197	9.00594	9.0074	9.15105	9.13175	8.69871	8.65132	8.79156	8.77885	405.099	0.0962442
ENSMUSG00000006675	7.62247	7.79933	7.60113	7.58117	7.60904	7.87129	7.96597	7.91447	7.95847	8.082	7.89254	8.23665	8.52224	8.13625	8.17689	8.28239	8.34636	8.40018	8.61814	8.77464	8.53206	8.9855	8.63403	8.54167	8.44189	8.38959	8.54606	8.3212	8.14698	8.71475	8.88871	8.6273	8.55762	8.72961	8.59274	7.67431	7.59511	7.91724	7.97767	8.29838	8.26855	8.59765	8.71719	8.45772	8.33808	8.74358	8.62666	200.885	-0.176689
ENSMUSG00000006676	8.33281	8.22598	8.56177	8.21902	8.50204	8.41693	8.59518	8.43566	8.40337	8.35763	8.65118	8.48131	8.50564	8.45361	8.36906	8.51213	8.36783	8.88069	8.73081	8.68854	8.98913	8.47483	8.83419	7.49379	7.51755	7.57563	7.43563	7.41392	7.68433	7.80717	7.89314	7.7673	7.55099	7.49442	7.60827	8.37352	8.36053	8.48259	8.47073	8.48019	8.41634	8.76668	8.76605	7.52899	7.51129	7.82254	7.55123	334.033	-0.0230086
ENSMUSG00000006678	5.64655	5.43212	5.50009	5.59325	5.56588	5.43055	5.50588	5.57518	5.64606	5.48017	5.5479	5.67107	5.51495	5.63088	5.6118	5.65131	5.61249	6.26385	5.7235	5.64311	5.94751	5.61288	5.74317	5.04439	5.21223	5.26607	5.32936	5.13493	5.20877	4.90217	5.06296	5.16365	5.06238	4.98951	4.99916	5.52625	5.57957	5.50387	5.55804	5.60563	5.6252	5.87682	5.76785	5.17423	5.22435	5.04292	5.01701	47.0912	0.195444
ENSMUSG00000006699	10.6953	10.4719	10.4687	10.721	10.4459	10.779	10.3775	10.6062	10.6315	10.3483	10.358	10.9119	10.6081	10.7795	10.9999	10.8123	10.7881	11.0335	10.879	10.812	10.9119	10.6892	10.8235	10.7871	10.7798	10.8478	10.7791	10.8956	10.9328	10.4711	10.4784	10.5119	11.0204	11.0004	10.7271	10.5453	10.5834	10.5876	10.4459	10.7665	10.8668	10.9082	10.8082	10.8049	10.8692	10.4871	10.916	1522.89	0.0677664
ENSMUSG00000006705	6.13846	6.06952	6.06575	6.07978	6.141	6.21596	6.00145	5.92834	6.05273	6.08393	6.03579	6.37387	6.44787	6.48212	6.38782	6.37423	6.49222	6.42769	6.40467	6.47053	6.43616	6.43912	6.47331	6.39211	6.30383	6.17588	6.13549	6.1702	6.05938	6.25819	6.1575	6.53859	6.22962	6.07111	6.03609	6.09124	6.11039	6.04858	6.05748	6.43462	6.41809	6.4343	6.44953	6.29061	6.12169	6.31809	6.11227	68.5289	0.0653425
ENSMUSG00000006711	6.18526	6.14084	5.94089	5.96088	5.94603	6.5342	6.87594	6.80382	6.61055	6.79265	6.40177	7.28792	7.33893	6.52793	7.23186	7.37186	7.37246	8.01219	8.22859	8.33177	8.33897	8.67687	8.23464	8.40834	8.23548	8.58021	8.58634	8.07309	7.66087	8.8134	9.14357	8.51169	7.8487	8.45563	8.42709	6.089	5.95346	6.73799	6.60166	7.05159	7.32539	8.19085	8.41682	8.40801	8.10677	8.82289	8.24381	66.6432	-0.472253
ENSMUSG00000006715	4.25106	4.29726	4.33082	4.2828	4.23561	4.3444	4.25168	4.29471	4.40408	4.34992	4.35372	4.43294	4.40953	4.438	4.54238	4.42903	4.34313	4.76273	4.68804	4.59062	4.66074	4.44577	4.5564	4.53787	4.46876	4.3624	4.43208	4.56329	4.40279	4.79671	4.6227	4.41692	5.12725	4.8832	4.89123	4.29304	4.25921	4.29693	4.36924	4.42682	4.43818	4.68046	4.55431	4.45634	4.46606	4.61211	4.96723	19.5458	-0.263756
ENSMUSG00000006717	9.72091	9.6396	9.53649	9.72047	9.44763	9.74884	9.50738	9.57374	9.7418	9.46655	9.51996	9.73901	9.67174	9.82465	9.88198	9.7693	9.78244	9.97395	9.86995	9.72916	9.79206	9.81584	9.81567	9.5094	9.5602	9.4822	9.494	9.60644	9.45539	9.52967	9.2562	9.55059	9.45448	9.42509	9.43755	9.63233	9.58405	9.60999	9.5761	9.74513	9.81124	9.85769	9.80786	9.51727	9.51861	9.44549	9.43904	788.618	-0.0748505
ENSMUSG00000006720	3.18295	3.20297	3.11176	3.1952	3.17336	2.80121	2.73318	2.83009	2.68539	2.80088	2.70917	3.30111	3.18733	3.22625	3.25497	3.2801	3.19757	3.40149	3.2774	3.2706	3.44623	3.23188	3.45227	2.48554	2.53628	2.43033	2.53252	2.5324	2.59337	2.94116	2.94136	2.98812	3.29592	3.07606	3.06132	3.16589	3.18428	2.78816	2.73181	3.23823	3.24421	3.3165	3.37679	2.48405	2.55276	2.95688	3.14443	9.13841	0.248453
ENSMUSG00000006728	7.66829	7.69052	7.68791	7.63998	7.67869	7.63407	7.66284	7.47625	7.44145	7.56513	7.62387	7.61016	7.64066	7.73006	7.54786	7.72186	7.62993	7.66165	7.72509	7.81988	7.4744	7.67651	7.8412	7.0149	7.15409	7.1625	6.9223	7.03233	7.22489	7.11151	7.06322	7.54006	7.43813	7.54612	7.74503	7.68224	7.65933	7.59105	7.54348	7.66029	7.63322	7.73554	7.66404	7.1105	7.05984	7.23827	7.57643	204.1	-0.0473872
ENSMUSG00000006731	5.44514	5.52899	5.34655	5.33625	5.38056	5.52365	5.63514	5.64614	5.65479	5.76426	5.31887	6.21307	6.32908	5.86721	6.1724	6.23303	6.28029	6.53992	7.02426	6.90246	6.93597	7.12769	6.82292	6.69578	6.56815	6.71698	6.78606	6.71339	6.39612	7.07761	7.25944	6.91677	7.06198	7.30608	7.18742	5.44023	5.35841	5.60164	5.57931	6.13645	6.22857	6.82221	6.96219	6.66031	6.63186	7.08461	7.18516	42.8658	-0.358157
ENSMUSG00000006732	4.79936	4.84709	4.93844	4.83661	4.83352	4.85692	4.99779	4.90527	4.94591	4.90885	5.04981	5.12768	5.06285	5.04894	4.93202	5.11748	4.9709	5.03394	5.20471	5.29646	5.0638	4.89447	5.12189	4.35167	4.36998	4.4251	4.16735	4.31897	4.22259	4.73088	4.80575	4.54721	4.85741	4.75853	4.77996	4.86163	4.83507	4.92	4.96819	5.07983	5.0068	5.17837	5.02672	4.38225	4.2363	4.69461	4.79863	28.9372	-0.158519
ENSMUSG00000006736	8.69559	8.72321	8.97459	8.79847	9.09078	8.61279	8.56741	8.73016	8.55827	8.74336	8.73875	8.88172	9.38888	9.17795	8.95352	9.1877	9.24657	9.0568	9.17388	9.2815	8.97793	9.50332	9.31037	9.00332	8.9478	8.9348	8.92968	8.69016	8.93074	9.09275	9.32988	9.33804	8.73969	9.01212	9.15852	8.7978	8.94463	8.63679	8.68013	9.14952	9.12927	9.17073	9.26387	8.96197	8.85019	9.25356	8.97011	469.396	0.272021
ENSMUSG00000006740	11.5276	11.3547	11.3912	11.6214	11.2929	11.5828	11.1879	11.2826	11.449	11.0197	11.2347	11.4662	11.2899	11.5684	11.5042	11.4425	11.4683	11.8885	11.4394	11.3482	11.5609	11.5073	11.3838	11.4335	11.6753	11.4696	11.3804	11.7632	11.5467	11.2447	11.0006	11.5572	11.8734	11.6839	11.4692	11.4245	11.4572	11.3511	11.2345	11.4415	11.4717	11.5587	11.484	11.5261	11.5634	11.2675	11.6755	2795.65	0.0684205
ENSMUSG00000006763	5.55556	5.62317	5.68278	5.6211	5.61285	5.73755	5.66195	5.66066	5.57006	5.5934	5.63958	5.45666	5.45832	5.57594	5.48628	5.57412	5.3441	5.56615	5.64054	5.48329	5.60059	5.39244	5.52835	5.19919	5.04275	5.06119	5.13694	5.20089	5.36961	5.00059	4.87229	4.89658	4.88863	4.78344	4.88203	5.6205	5.61697	5.68672	5.60101	5.49697	5.46817	5.56333	5.50713	5.10105	5.23582	4.92315	4.85137	49.2207	-0.0205751
ENSMUSG00000006764	2.7537	2.70674	2.81795	2.72228	2.77582	2.80439	2.83728	2.82657	2.85437	2.90402	2.88714	3.20581	3.25164	3.299	3.37445	3.25163	3.21969	3.20794	3.08289	3.13101	2.94527	3.15347	3.16933	NA	NA	NA	NA	NA	NA	2.85263	2.81084	2.51705	2.73628	2.68705	2.59395	2.75946	2.74905	2.82275	2.88184	3.25215	3.28192	3.14061	3.08936	NA	NA	2.72684	2.67243	6.67869	-0.201755
ENSMUSG00000006782	10.7317	10.7246	11.053	10.7886	10.8738	10.789	10.9167	10.8661	10.9432	10.7655	11.0617	10.6282	10.664	10.8069	10.6753	10.8161	10.4852	10.8324	10.7613	10.7005	10.7697	10.4264	10.8847	9.44796	9.69914	9.67825	9.63445	9.62878	9.9098	9.78584	9.69144	9.83755	10.1834	10.0084	10.3151	10.8364	10.8312	10.8573	10.9235	10.6997	10.6588	10.7647	10.6936	9.60845	9.72434	9.77161	10.169	1840.61	-0.0259832
ENSMUSG00000006784	4.06578	4.14482	4.14113	4.0473	4.06808	4.24325	4.32635	4.25754	4.18583	4.22814	4.41584	3.89077	3.91562	4.07443	4.00397	4.04974	3.97165	4.7686	4.64191	4.6108	4.57344	4.38809	4.55277	3.51153	3.41201	3.36487	3.49548	3.51214	3.47596	3.41366	3.43755	3.56986	3.3258	3.31122	3.4309	4.11724	4.05769	4.27571	4.2766	3.96027	4.00845	4.67377	4.50477	3.42947	3.49453	3.47369	3.35597	17.1613	-0.508878
ENSMUSG00000006800	9.0238	9.07179	9.00223	8.91523	8.91184	8.97321	8.98002	8.90437	9.09876	9.17714	9.05639	9.27478	9.66341	9.22554	9.54001	9.35972	9.66525	9.60463	9.51303	9.82035	9.71914	10.1122	9.78334	10.067	9.93804	10.2663	10.1522	10.2853	10.0449	10.0718	10.3988	10.0624	11.7286	11.8395	11.8546	9.03261	8.91354	8.95253	9.11076	9.38791	9.52166	9.646	9.87155	10.0904	10.1608	10.1776	11.8076	508.016	-0.216568
ENSMUSG00000006818	10.3214	10.3091	10.3661	10.4343	10.2122	10.4245	10.2897	10.2712	10.4754	10.199	10.3493	10.417	10.423	10.641	10.5507	10.404	10.4888	10.7998	10.6291	10.6555	10.6197	10.5362	10.7199	10.1175	10.2558	10.2259	10.1471	10.2213	10.3729	10.1272	10.1095	10.2284	9.90066	9.77872	9.81151	10.3322	10.3232	10.3285	10.3413	10.4937	10.4812	10.6948	10.6253	10.1998	10.2471	10.155	9.8303	1289.97	-0.00743695
ENSMUSG00000006850	4.74697	4.87443	4.78793	4.80488	4.78594	4.62998	4.61377	4.5135	4.46797	4.65698	4.66719	5.02825	5.35868	5.13637	5.09909	5.22004	5.13779	4.87242	5.01922	4.88136	4.80307	4.93036	4.93281	4.26226	4.0335	4.13821	4.10939	4.2289	4.25192	4.19503	4.24501	4.55032	4.23816	4.08774	4.25711	4.80311	4.79541	4.58575	4.59738	5.17443	5.15231	4.92433	4.88875	4.14465	4.19674	4.33012	4.19434	28.0269	-0.0512339
ENSMUSG00000006906	6.9543	6.85239	6.90053	6.93786	6.78271	7.05784	7.00276	6.90676	6.98524	6.66148	6.85867	7.17952	6.96199	7.09883	7.13594	7.20111	7.08318	7.51374	7.58013	7.33236	7.53066	7.21349	7.32208	7.08362	6.98229	7.01228	7.24635	7.09669	7.09935	7.0006	7.08925	6.83252	7.28812	7.20689	7.28452	6.90241	6.86028	6.98912	6.83513	7.08011	7.14008	7.47541	7.35541	7.02606	7.14746	6.97412	7.25984	118.864	-0.108987
ENSMUSG00000006920	6.96942	6.82523	6.96927	6.99004	6.8793	6.97258	7.13217	7.25431	7.05905	6.99427	6.90157	7.42497	7.30953	7.39576	7.31308	7.46653	7.38588	7.68705	7.63856	7.54682	7.75396	7.24361	7.37816	7.14053	7.0169	7.11098	7.20142	7.01347	7.11588	7.25733	7.46552	7.08816	7.12287	6.98564	7.01112	6.92131	6.93467	7.11969	6.98496	7.37675	7.3885	7.62415	7.45858	7.08947	7.11026	7.27034	7.03988	122.134	0.0265085
ENSMUSG00000006930	8.14393	7.97651	7.61937	7.68291	7.48367	8.27672	8.70113	8.32592	8.39551	8.3395	7.77456	8.66948	8.4512	7.79214	8.58874	8.72408	8.38412	8.70358	9.06691	9.14582	9.1585	8.90807	8.86827	8.64345	8.32747	8.18931	8.4644	8.37774	8.10639	8.82476	8.78268	8.27842	8.5606	8.60845	8.86417	7.91327	7.58329	8.43459	8.16986	8.30427	8.56565	8.9721	8.97828	8.38675	8.31618	8.62862	8.67774	230.206	-0.754198
ENSMUSG00000006931	7.37621	7.24728	7.41712	7.38317	7.41517	7.27962	7.26746	7.26675	7.14702	7.54965	7.45418	7.48698	7.81	7.7631	7.54737	7.55103	7.65151	7.54136	7.57904	7.94023	7.5164	8.14869	7.88126	7.59966	7.46308	7.49362	7.63757	7.29278	7.6302	7.63287	7.67436	8.02182	7.56139	7.75819	7.9995	7.34687	7.39917	7.27128	7.38362	7.6867	7.5833	7.68687	7.84878	7.51878	7.52018	7.77635	7.77303	165.451	0.112703
ENSMUSG00000006932	11.9032	11.8883	12.0979	12.0299	12.0589	12.0422	12.078	11.9711	11.9584	11.8396	12.1594	12.1171	12.0172	12.154	12.0617	12.1377	11.9414	12.4573	12.2079	12.159	12.3806	11.9405	12.2235	11.1873	11.2823	11.2857	11.3078	11.2641	11.5354	11.5398	11.4856	11.4354	11.684	11.5051	11.6512	11.9631	12.0444	12.0304	11.9858	12.0961	12.0469	12.2747	12.1815	11.2518	11.3691	11.487	11.6134	4098.68	0.12352
ENSMUSG00000006941	8.64796	8.65323	8.63178	8.65643	8.65611	8.72748	8.72824	8.76403	8.76972	8.81398	8.91748	9.17958	9.33248	9.17461	9.20657	9.1527	9.28944	9.44682	9.15218	9.14892	9.17974	9.28028	9.21811	8.90552	9.02282	8.86248	8.83385	9.15656	8.83258	9.20075	9.19712	9.37548	9.60447	9.62999	9.48163	8.64433	8.65627	8.73991	8.83372	9.22889	9.21624	9.24931	9.22604	8.93028	8.94099	9.25778	9.57203	401.482	0.0223466
ENSMUSG00000006958	3.16749	3.23561	3.23405	3.2147	3.257	3.6365	3.64706	3.63307	3.675	3.70609	3.70995	3.58319	3.66415	3.59573	3.57498	3.66625	3.67179	4.46247	4.51188	4.44137	4.65467	4.71768	4.60041	4.109	4.31194	4.29739	4.35652	4.03829	4.27351	4.57538	4.68852	4.45452	4.44046	4.51458	4.71821	3.21238	3.23585	3.63888	3.69701	3.61436	3.63767	4.47191	4.65759	4.23944	4.22277	4.57281	4.55775	9.27858	0.318926
ENSMUSG00000006998	8.9641	8.85171	9.05441	9.02813	9.12736	8.90244	9.14039	9.02597	8.91184	9.23027	9.14731	9.20694	9.23995	9.17803	9.11557	9.25416	9.10462	9.20017	9.12429	9.00002	9.18347	8.88792	9.13113	8.36019	8.47322	8.48357	8.44161	8.58538	8.66601	8.73079	8.69194	8.61423	8.53895	8.53393	8.62521	8.95674	9.07774	9.02294	9.09647	9.20831	9.15812	9.10816	9.06751	8.43899	8.56433	8.67899	8.56603	516.052	0.214096
ENSMUSG00000007021	6.38435	6.46959	6.25729	6.15838	6.13513	6.51883	6.75614	6.76007	6.59648	6.88279	6.28376	7.43549	7.40146	6.69454	7.2204	7.30369	7.26049	7.52699	8.03893	8.02366	7.87905	8.20377	7.97141	7.82348	7.57312	7.60809	7.6314	7.58887	7.14721	8.09523	8.18277	7.75986	7.64294	7.8945	7.98766	6.37041	6.14675	6.67835	6.58768	7.17716	7.26153	7.86319	8.01808	7.66823	7.45583	8.01262	7.8417	79.4109	-0.70876
ENSMUSG00000007029	6.68099	6.53951	6.77452	6.74784	6.805	6.77402	6.97802	7.04254	6.78857	7.03626	7.15672	6.95899	6.98529	6.98908	6.90806	7.06089	6.82343	7.09061	7.08848	7.21988	7.00424	6.91888	7.24342	6.04253	6.12235	6.15706	6.19765	6.06332	6.36534	6.24704	6.27911	6.20562	6.15154	6.20049	6.49469	6.665	6.77642	6.93153	6.99385	6.97779	6.93079	7.13299	7.05551	6.10731	6.20877	6.24392	6.28224	105.144	0.283233
ENSMUSG00000007030	NA	NA	NA	NA	NA	NA	NA	NA	NA	NA	NA	1.68598	1.77778	1.67774	1.7002	1.72158	1.79125	NA	NA	NA	NA	NA	NA	NA	NA	NA	NA	NA	NA	2.34823	2.48081	2.3545	2.6441	2.71728	2.80049	NA	NA	NA	NA	1.71383	1.73768	NA	NA	NA	NA	2.39451	2.72062	NA	NA
ENSMUSG00000007036	8.20345	8.23079	8.24576	8.12744	8.28314	8.10537	8.1604	8.2628	8.13499	8.29575	8.30261	8.45157	8.56589	8.5474	8.24678	8.4697	8.47083	8.24399	8.67465	8.65786	8.30814	8.7998	8.66672	8.40041	8.2905	8.34307	8.4449	8.2211	8.24057	8.30764	8.49123	8.476	8.31427	8.41664	8.51061	8.22667	8.20529	8.17619	8.24445	8.52162	8.39577	8.5255	8.59155	8.34466	8.30219	8.42496	8.41384	298.073	-0.0327452
ENSMUSG00000007038	6.87265	6.83558	6.88966	6.74193	6.99831	6.96128	7.16519	7.13698	6.9909	7.27905	7.25625	7.19705	7.55941	7.17391	7.23415	7.28054	7.32479	7.12264	7.60867	7.69038	7.38592	7.89003	7.69546	7.16246	7.05676	7.17041	7.16678	7.01756	6.97012	7.36395	7.51885	7.43989	7.37242	7.56924	7.52768	6.86596	6.87012	7.08782	7.1754	7.31012	7.27983	7.4739	7.65714	7.12988	7.05149	7.44089	7.48978	117.041	0.0371552
ENSMUSG00000007039	7.19894	7.30247	7.2379	7.27741	7.35127	7.24103	7.40335	7.17867	7.31858	7.4067	7.51107	7.27046	7.49399	7.54831	7.44842	7.29468	7.26489	7.07358	7.18786	7.14889	7.0755	7.11296	7.21445	6.26714	6.37361	6.26158	6.29219	6.71885	6.7018	6.5491	6.72508	6.60092	7.5988	7.4525	7.55292	7.24644	7.31434	7.27435	7.41212	7.43759	7.336	7.13678	7.1343	6.30078	6.57094	6.62504	7.53474	154.917	0.159697
ENSMUSG00000007041	7.03476	7.00342	7.13038	7.03852	7.09246	7.13169	7.20283	7.08553	7.12756	7.20517	7.21082	6.91067	7.13422	7.04623	6.93453	7.01898	6.94879	6.78679	6.86221	6.93029	6.74889	6.67592	6.91301	5.92285	6.07901	5.99062	5.98841	6.35733	6.30986	6.24405	6.32018	6.61822	7.52061	7.42958	7.61565	7.05619	7.06549	7.14002	7.18118	7.03037	6.96743	6.85976	6.77927	5.99749	6.21853	6.39415	7.52195	133.483	0.0207735
ENSMUSG00000007050	5.70405	5.64493	5.57266	5.59956	5.55005	5.84915	5.72928	5.73841	5.73487	5.86882	5.70273	5.97625	6.01163	5.91573	5.94066	6.01995	5.941	6.15018	6.0827	6.2256	6.12209	6.20316	6.15019	5.60389	5.65541	5.52947	5.58987	5.69921	5.41465	6.00375	5.9799	5.96965	6.2397	6.12772	6.25682	5.64055	5.5748	5.77228	5.76881	5.96787	5.9672	6.15283	6.15848	5.59625	5.56791	5.98443	6.20808	49.3578	-0.265692
ENSMUSG00000007080	3.74636	3.69315	3.82929	3.84472	3.75737	3.53508	3.59217	3.60736	3.54342	3.66691	3.68995	4.19837	3.99932	3.99802	4.1763	4.00637	4.13404	3.51826	3.33783	3.36979	3.34472	3.38711	3.40344	2.88835	2.89364	3.01391	2.98744	2.90999	2.9844	3.43138	3.40765	3.60065	3.90959	3.64931	3.75794	3.75627	3.80105	3.5782	3.63343	4.06524	4.10557	3.40863	3.37842	2.93197	2.96061	3.47989	3.77228	13.8314	0.424548
ENSMUSG00000007097	16.2814	16.4036	16.5023	16.402	16.5623	16.3696	16.4642	16.4068	16.3778	16.5765	16.5653	16.4459	16.9389	16.7547	16.706	16.6285	16.7514	16.7214	16.6024	16.8663	16.5964	17.0014	16.8838	16.3614	16.3822	16.3161	16.4853	16.1631	16.5659	16.2349	16.4203	16.6	15.9079	16.0398	16.2616	16.3958	16.4821	16.4135	16.5065	16.7132	16.6953	16.73	16.8272	16.3532	16.4048	16.4184	16.0698	88733.7	0.135106
ENSMUSG00000007107	2.03361	2.08958	2.06527	2.10565	2.05706	1.78162	1.90247	1.78354	1.79353	1.82485	1.85836	1.96296	2.03448	2.06968	2.06381	1.98331	1.99148	2.38954	2.37692	2.22723	2.36163	2.46795	2.32682	2.26716	2.20717	2.26131	2.36382	2.22924	2.50413	1.65815	1.7112	1.76807	1.62243	1.69774	1.7719	2.06282	2.08135	1.82254	1.82558	2.02237	2.01287	2.33123	2.38546	2.24521	2.36573	1.71247	1.69736	4.29033	0.517724
ENSMUSG00000007122	NA	NA	NA	NA	NA	NA	NA	NA	NA	NA	NA	NA	NA	NA	NA	NA	NA	NA	NA	NA	NA	NA	NA	NA	NA	NA	NA	NA	NA	2.02255	2.04082	1.99307	2.301	2.0278	2.24928	NA	NA	NA	NA	NA	NA	NA	NA	NA	NA	2.01881	2.19269	NA	NA
ENSMUSG00000007207	6.58563	6.65336	6.21482	6.23239	6.20709	6.95206	7.21414	7.12843	7.08822	7.33156	6.62223	8.04221	7.59696	7.00455	7.57074	7.84807	7.66702	8.14259	8.54816	8.18084	8.57663	8.1697	8.208	7.98717	7.89944	7.88151	8.05881	7.91302	7.33884	8.15863	8.2578	7.57158	7.8473	7.73843	7.56829	6.48461	6.21974	7.09821	7.014	7.54791	7.69528	8.29053	8.31811	7.9227	7.77022	7.996	7.71801	86.9496	-0.844831
ENSMUSG00000007216	4.34326	4.38987	4.4171	4.23415	4.3583	4.38618	4.42611	4.44238	4.41955	4.46029	4.5645	4.38104	4.40623	4.41554	4.27793	4.49296	4.35328	4.32437	4.32615	4.35972	4.27538	4.25346	4.32986	3.48637	3.49373	3.40996	3.4006	3.41834	3.38414	3.61326	3.45182	3.64016	3.36991	3.35555	3.39707	4.38341	4.29623	4.41822	4.48145	4.40094	4.37472	4.33675	4.28623	3.46335	3.40103	3.56841	3.37418	20.4224	-0.622775
ENSMUSG00000007279	1.7857	1.8027	1.71934	1.72286	1.77635	1.76062	1.75406	1.72587	1.67864	1.77033	1.6797	NA	NA	NA	NA	NA	NA	2.07628	2.16767	2.11769	2.09231	2.16074	2.14326	3.06759	2.95116	2.87235	2.92774	2.88912	2.82068	3.00435	2.87836	2.79036	2.74231	2.81794	2.66065	1.76925	1.74961	1.74685	1.70956	NA	NA	2.12055	2.1321	2.9637	2.87918	2.89103	2.7403	3.42462	-0.737528
ENSMUSG00000007338	7.03005	6.96561	7.07739	7.12256	7.06467	7.08658	7.18068	7.26724	7.17109	7.16804	7.20344	7.43779	7.47801	7.52424	7.39966	7.51013	7.49871	7.4727	7.52774	7.5097	7.47765	7.51718	7.71148	6.98833	7.14281	7.07189	6.9243	7.069	6.94354	7.19454	7.18912	7.3858	7.22338	7.07134	7.29399	7.02435	7.09362	7.17817	7.18085	7.48002	7.4695	7.50338	7.56877	7.06768	6.97895	7.25649	7.19624	132.957	0.163375
ENSMUSG00000007411	8.46983	8.27312	8.37013	8.50841	8.36323	8.52333	8.28462	8.41765	8.52297	8.35487	8.29242	8.62547	8.41915	8.61651	8.52506	8.57682	8.56345	9.02282	8.66769	8.6176	8.92088	8.49687	8.68186	8.39516	8.4926	8.46099	8.43363	8.65766	8.5623	8.45808	8.25058	8.45705	8.58613	8.19414	8.20849	8.37103	8.43582	8.40853	8.39009	8.55371	8.55511	8.76937	8.69987	8.44958	8.5512	8.38857	8.32959	338.684	0.119866
ENSMUSG00000007415	8.06141	8.00542	8.10472	8.10695	8.10331	8.07065	8.121	8.02487	8.15056	8.05473	7.87423	8.12694	8.33535	8.34949	8.22678	8.29201	8.35118	8.47048	8.39223	8.5295	8.35554	8.46243	8.52042	8.3924	8.35145	8.46469	8.32091	8.15357	8.4278	8.27951	8.30018	8.48492	8.19107	8.40155	8.37138	8.05718	8.10513	8.07217	8.02651	8.27059	8.28999	8.46407	8.44613	8.40285	8.30076	8.35487	8.32134	270.094	0.0934566
ENSMUSG00000007440	3.62264	3.65588	3.54963	3.64996	3.64684	4.08924	4.14537	4.08476	3.94666	4.15014	3.839	4.41771	4.24982	4.07548	4.27008	4.32558	4.45573	5.14354	5.23367	5.48274	5.44384	5.55481	5.30805	6.16926	6.04519	6.17882	6.24103	6.19666	5.69724	5.80396	6.13254	5.41853	5.57782	5.55816	5.66827	3.60938	3.6484	4.10645	3.9786	4.24767	4.35046	5.28665	5.43557	6.13109	6.04498	5.78501	5.60142	12.4418	0.406257
ENSMUSG00000007458	8.46282	8.48002	8.43228	8.5374	8.60899	8.58142	8.68238	8.64826	8.68884	8.74652	8.53247	8.82015	9.1252	8.89419	8.86752	8.96784	9.19197	9.00055	9.08613	9.27467	9.01777	9.42652	9.33203	9.12969	9.04131	8.97014	9.12828	8.82806	8.90014	9.14871	9.28181	9.30032	9.29737	9.52297	9.4732	8.45837	8.5732	8.63735	8.65594	8.94651	9.00911	9.12045	9.25877	9.04705	8.95216	9.24361	9.43118	363.841	0.219639
ENSMUSG00000007480	NA	NA	NA	NA	NA	2.36129	2.305	2.3407	2.25259	2.30266	2.38404	3.0923	3.03575	3.0927	2.99835	3.04988	3.1665	2.4379	2.29955	2.4705	2.31718	2.63139	2.48059	1.93946	2.02738	2.1814	2.12859	2.06763	1.97294	2.17433	2.26949	2.11424	2.13981	2.2474	2.24822	NA	NA	2.33566	2.3131	3.07358	3.07157	2.40265	2.47639	2.04941	2.05639	2.18602	2.21181	NA	NA
ENSMUSG00000007564	10.4968	10.4894	10.7358	10.5181	10.6782	10.6227	10.8235	10.723	10.6365	10.6957	10.8259	10.8149	10.7943	10.7744	10.7418	10.8813	10.7113	11.008	11.0064	10.9061	11.0384	10.7074	10.9474	9.86673	9.97228	9.99926	9.99502	9.9821	9.96951	10.4055	10.4075	10.172	10.2682	10.1673	10.2315	10.574	10.5982	10.7231	10.7194	10.7945	10.7781	10.9735	10.8977	9.94609	9.98221	10.3283	10.2223	1543.14	0.0348481
ENSMUSG00000007570	3.32393	3.33021	3.46684	3.36003	3.34057	3.69003	3.68564	3.64192	3.67631	3.80642	3.77077	3.8524	4.01959	3.98202	3.89698	3.96204	3.92259	3.5202	3.80203	3.66523	3.50536	3.73737	3.65637	3.19107	3.37486	3.27169	3.20848	3.36815	3.20645	3.59285	3.7956	3.67353	3.99548	3.7795	3.94942	3.37366	3.3503	3.67253	3.75117	3.95134	3.9272	3.66249	3.63303	3.27921	3.26102	3.68732	3.90814	10.3785	-0.327315
ENSMUSG00000007589	5.31337	5.2429	5.34424	5.26491	5.35171	5.48061	5.38779	5.42064	5.50373	5.45286	5.34411	5.36904	5.43207	5.61339	5.44058	5.5087	5.41248	5.19287	5.32114	5.40054	5.19995	5.33976	5.22902	4.8751	4.83303	5.11472	4.8371	5.13708	5.16742	4.9894	5.02758	5.0509	5.18404	5.49655	5.35393	5.30017	5.30831	5.42968	5.43357	5.4715	5.45392	5.30485	5.25624	4.94095	5.0472	5.02263	5.34484	39.404	0.0402605
ENSMUSG00000007594	5.45944	5.48537	5.42232	5.27251	5.38421	5.70772	6.14886	5.97078	5.87032	6.10486	5.78611	6.69917	6.7069	6.09784	6.40513	6.58645	6.65411	6.94472	7.35572	7.45944	7.29471	7.74171	7.34992	7.0479	6.7815	6.84869	6.965	6.56683	6.42742	7.38972	7.59206	6.92275	6.95256	7.08364	7.12562	5.45571	5.32836	5.94246	5.92043	6.5013	6.54856	7.25329	7.46211	6.8927	6.65309	7.30151	7.05394	42.6652	-0.541367
ENSMUSG00000007603	5.86061	5.92031	5.80024	5.78618	5.71774	5.67831	5.96654	5.95213	6.00274	5.89287	5.91996	6.24627	6.08303	6.06075	6.19248	6.08417	5.97228	6.31368	6.31648	6.27012	6.34111	6.22443	6.20789	5.52685	5.67323	5.38065	5.60891	5.62561	5.52136	5.81466	5.77876	5.82952	5.85746	5.56413	5.76621	5.86039	5.75196	5.86566	5.93852	6.13002	6.08297	6.3001	6.25781	5.52691	5.58529	5.80765	5.72927	56.9564	-0.403639
ENSMUSG00000007610	3.54121	3.5494	3.51397	3.62775	3.57437	3.97478	4.05622	3.97831	3.96199	3.92393	3.94727	4.2115	4.16964	4.24835	4.10313	4.18185	4.16547	4.15916	4.25049	4.15185	4.26766	4.32673	4.35264	3.6311	3.58458	3.46554	3.52456	3.56052	3.73499	4.37246	4.21758	4.19992	4.14162	4.39763	4.23498	3.53486	3.60106	4.0031	3.9444	4.20983	4.15015	4.18717	4.31567	3.56041	3.60669	4.26332	4.25808	11.9171	0.729456
ENSMUSG00000007613	6.36094	6.32266	6.15691	6.41104	6.3935	6.54412	6.25606	6.22394	6.32492	6.31355	6.40827	6.21568	6.34452	6.26949	6.35775	6.30574	6.37201	6.28299	6.3571	6.41404	6.24722	6.66059	6.38879	6.64992	6.57403	6.64715	6.68558	6.50591	6.49221	6.7882	6.64804	6.6826	6.82615	6.6915	6.89157	6.28017	6.40227	6.34137	6.34891	6.27656	6.34516	6.35138	6.4322	6.6237	6.56123	6.70628	6.80307	81.0689	0.352151
ENSMUSG00000007617	7.02756	6.99665	6.90792	6.92955	6.81583	7.28338	7.28908	7.18577	7.17556	7.28398	6.83831	8.18091	7.80786	7.51876	8.08041	7.94682	7.96853	8.566	8.57295	8.4804	8.96393	8.68057	8.46069	8.7886	8.74383	8.79876	8.87621	8.75741	8.08657	8.80805	8.85971	8.62615	8.36983	8.4685	8.21843	6.97738	6.87269	7.25274	7.09928	7.83584	7.99858	8.53979	8.70173	8.77706	8.57339	8.76464	8.35225	123.268	-0.268363
ENSMUSG00000007646	2.92539	2.93272	2.88838	2.91095	2.83278	2.9577	2.88929	2.89551	2.96572	2.97526	2.89052	3.60259	3.44982	3.57249	3.63738	3.50463	3.60629	3.97529	3.94937	3.88013	3.95018	3.9886	3.91336	3.49847	3.56923	3.68717	3.58062	3.66284	3.5188	3.64775	3.86834	3.55876	3.59096	3.58177	3.63424	2.9155	2.87187	2.91417	2.94383	3.54164	3.58277	3.93493	3.95071	3.58496	3.58742	3.69161	3.60232	7.68635	-0.785808
ENSMUSG00000007653	8.46086	8.45686	8.01836	8.223	7.97995	8.7859	8.80428	8.8434	8.7819	8.78546	8.2008	9.63679	9.22277	8.66389	9.44489	9.40876	9.39963	9.73201	10.1648	10.0713	10.0705	10.3355	9.98422	10.3673	10.2209	10.3744	10.5199	10.0646	9.59116	10.3545	10.5026	9.9239	9.89113	10.0192	9.82098	8.31203	8.10147	8.81119	8.58938	9.17448	9.41776	9.98937	10.1301	10.3209	10.0585	10.2603	9.91043	308.803	-0.439295
ENSMUSG00000007655	4.8327	4.93016	4.87884	4.89152	4.86253	4.89161	4.84283	4.85064	4.95293	4.89753	4.84156	4.77939	4.80487	4.88285	4.93485	4.7315	4.87288	4.80263	4.70204	4.66082	4.69618	4.76668	4.64217	4.62575	4.45078	4.4243	4.36241	4.96893	4.76735	5.11652	5.47799	5.53812	7.25749	7.23564	7.42518	4.88057	4.87703	4.86169	4.89734	4.82237	4.84641	4.72183	4.70167	4.50028	4.69956	5.37755	7.30611	29.5518	-0.0243661
ENSMUSG00000007656	8.71053	8.6122	8.54135	8.70172	8.41214	8.68503	8.4165	8.47467	8.72003	8.47673	8.37645	9.35453	8.92482	8.95209	9.23166	8.98151	9.17967	9.65239	9.3846	9.26379	9.67992	9.45438	9.3754	9.75228	9.72673	9.64298	9.68561	9.83083	9.30198	9.59441	9.45704	9.44534	9.68004	9.49342	9.17566	8.62136	8.55693	8.5254	8.5244	9.07715	9.13095	9.4336	9.50323	9.70733	9.60614	9.49893	9.44971	390.257	-0.110398
ENSMUSG00000007659	6.76966	6.85866	6.8383	6.68968	6.87206	6.79477	7.00361	6.885	6.96828	7.04303	7.0357	7.43071	7.32525	7.18671	7.35223	7.3175	7.29433	7.38479	7.36246	7.42252	7.37727	7.32105	7.31569	6.60514	6.52426	6.61564	6.58294	6.66171	6.5283	7.28265	7.32534	7.24598	7.68088	7.53042	7.69	6.82221	6.78087	6.89446	7.01567	7.31422	7.32135	7.38992	7.338	6.58168	6.59098	7.28466	7.63377	112.069	-0.0919254
ENSMUSG00000007670	8.28728	8.20341	8.36102	8.22504	8.32473	8.3301	8.27946	8.20051	8.27545	8.24622	8.5463	8.46085	8.53705	8.601	8.44187	8.42132	8.46518	8.85553	8.64171	8.64103	8.91823	8.59311	8.64911	7.91215	7.86694	7.93094	7.78026	7.75095	7.99339	8.22071	7.98883	8.07472	7.7488	7.72164	7.8447	8.2839	8.27488	8.27002	8.35599	8.53297	8.44279	8.71276	8.72015	7.90335	7.84153	8.09475	7.77172	311.361	-0.0176985
ENSMUSG00000007682	9.63017	9.66699	9.54435	9.74472	9.54515	9.71998	9.6205	9.60113	9.82018	9.61376	9.4962	9.62165	9.67817	9.88021	9.70726	9.59092	9.6526	9.79079	9.81477	9.81118	9.69177	9.75067	9.74291	9.40234	9.3934	9.54146	9.37915	9.36841	9.70164	9.2481	9.15395	9.45411	9.0005	8.96071	9.02699	9.61384	9.64494	9.6472	9.64338	9.72668	9.65026	9.80558	9.72845	9.44573	9.48307	9.28539	8.99607	793.273	0.0578119
ENSMUSG00000007721	7.43966	7.44778	7.58474	7.44419	7.34159	7.42615	7.52798	7.42796	7.57241	7.57369	7.67619	7.72053	7.86022	7.83329	7.74007	7.6809	7.73868	7.88833	7.91293	7.74764	7.87714	7.92981	7.97486	7.30599	7.15591	7.24526	7.25154	7.31717	7.34632	7.53101	7.49613	7.66964	7.49522	7.68846	7.66316	7.49073	7.39289	7.4607	7.60743	7.80468	7.71988	7.84963	7.92727	7.23572	7.30501	7.56559	7.61561	175.969	-0.226439
ENSMUSG00000007739	9.62086	9.45545	9.48971	9.50762	9.41633	9.67896	9.55658	9.66806	9.68364	9.39862	9.51783	9.8892	9.61331	9.83859	9.75637	9.78423	9.7235	10.3188	9.9941	9.89027	10.2556	9.75547	9.85465	9.41679	9.54322	9.4264	9.45707	9.70613	9.3764	9.55159	9.23162	9.44684	9.31448	9.10504	9.1663	9.52201	9.46197	9.63453	9.53336	9.78037	9.7547	10.0677	9.95522	9.46214	9.5132	9.41002	9.19527	725.245	-0.108262
ENSMUSG00000007777	6.88102	6.83733	6.87167	6.9779	6.92378	6.81968	6.93764	6.97292	6.87831	6.85255	7.02017	7.0268	7.19974	7.25701	7.10304	7.13921	7.15051	7.4727	7.2079	7.24916	7.27835	7.16364	7.33992	6.85433	7.01858	6.91529	6.74087	6.83611	6.7579	7.06672	7.09225	7.24714	7.23055	6.96017	7.01983	6.86334	6.95084	6.91008	6.91701	7.16119	7.13092	7.30992	7.26064	6.9294	6.7783	7.13537	7.07018	119.519	0.218847
ENSMUSG00000007783	7.52793	7.53466	7.53476	7.49379	7.56918	7.512	7.60444	7.51426	7.54808	7.73951	7.54584	7.98141	7.9057	7.70653	7.89451	7.93278	7.89433	7.98416	8.28018	8.34582	8.1189	8.36841	8.20732	7.8976	7.80347	7.83725	7.90983	8.01077	7.73463	7.92725	8.22593	8.00508	8.48405	8.69746	8.91377	7.53245	7.53148	7.54357	7.61114	7.86455	7.90721	8.20339	8.23155	7.84611	7.88508	8.05275	8.69843	185.052	0.00216929
ENSMUSG00000007812	6.9606	6.81446	6.64733	6.79763	6.6745	7.05978	6.93173	6.9136	7.01759	6.87151	7.01635	7.48561	7.17263	7.22988	7.43957	7.36174	7.39622	7.85404	7.4447	7.42924	7.89178	7.53364	7.44824	7.70548	7.61313	7.48043	7.64657	7.69481	7.53906	7.64928	7.46575	7.47796	7.56796	7.39898	7.29114	6.80747	6.73607	6.96837	6.96849	7.29604	7.39918	7.57599	7.62455	7.59968	7.62681	7.531	7.41936	111.384	-0.204932
ENSMUSG00000007815	9.41946	9.4422	9.79638	9.58858	9.85419	9.73521	10.2118	9.91189	9.91164	10.057	10.1682	9.8469	9.94865	9.96924	9.76347	9.89831	9.83699	9.75887	9.84061	9.80105	9.62024	9.53327	9.96185	8.55517	8.60218	8.71893	8.74487	8.85139	9.21156	9.13491	9.12653	9.15638	9.67124	9.55735	9.68914	9.55268	9.72139	9.95298	10.0456	9.9216	9.83293	9.80018	9.70512	8.62543	8.93594	9.13927	9.63924	800.514	0.278693
ENSMUSG00000007817	8.0005	7.97835	8.20358	8.06841	8.13035	8.31474	8.55946	8.39991	8.34679	8.33957	8.49384	8.49796	8.42141	8.40663	8.42636	8.48543	8.32929	8.81452	8.66761	8.71338	8.89525	8.5252	8.77256	7.73774	7.8961	7.88692	7.96907	7.79399	7.95399	8.1	8.05646	7.98718	8.01613	7.95749	7.85832	8.06081	8.09938	8.4247	8.3934	8.442	8.41369	8.73184	8.731	7.84025	7.90569	8.04788	7.94398	270.859	0.0678743
ENSMUSG00000007827	6.59956	6.43121	6.47198	6.45185	6.34785	6.70973	6.59876	6.62364	6.55272	6.5194	6.45093	6.62211	6.55098	6.71692	6.66996	6.63853	6.60447	7.52569	6.89807	6.96814	7.60967	6.6761	6.90347	6.48692	6.66961	6.41829	6.5735	6.49863	6.76507	6.64667	6.31422	6.40801	6.06817	5.90244	6.06599	6.50092	6.39985	6.64404	6.50769	6.63	6.63765	7.13063	7.06308	6.52494	6.6124	6.4563	6.0122	88.8541	-0.301567
ENSMUSG00000007833	4.16265	4.10439	4.22456	4.19397	4.20584	4.37887	4.46441	4.31199	4.46659	4.32175	4.50373	4.21085	4.18609	4.23459	4.07899	4.1554	4.20898	4.30592	4.35708	4.41283	4.36306	4.28493	4.39557	3.45693	3.50805	3.62521	3.3921	3.60192	3.48708	3.79823	3.89005	3.79761	3.82016	3.64901	3.91739	4.16387	4.1999	4.38509	4.43069	4.21051	4.14779	4.35861	4.34785	3.53006	3.4937	3.82863	3.79552	18.068	0.269054
ENSMUSG00000007836	8.12004	8.34683	8.40909	8.16924	8.36387	8.08026	8.17839	8.10229	8.01504	8.10981	8.32545	8.31579	8.35879	8.38857	8.10964	8.17761	8.25351	8.42555	8.63388	8.60719	8.49502	8.55308	8.59618	7.26378	7.39704	7.23114	7.36194	7.32562	7.5012	8.0463	7.65666	7.95559	7.66718	7.50322	7.69878	8.29199	8.26656	8.12031	8.1501	8.35438	8.18025	8.55554	8.54809	7.29732	7.39626	7.88618	7.62306	313.486	-0.0521493
ENSMUSG00000007837	4.35014	4.28429	4.37877	4.38384	4.38538	4.27637	4.29651	4.40785	4.44852	4.36391	4.41215	4.469	4.64741	4.59694	4.50976	4.46094	4.54388	4.43121	4.64729	4.56815	4.52141	4.72678	4.79874	3.91702	3.98419	3.85064	3.92957	3.94518	4.00481	3.71843	4.06962	4.19747	3.99603	4.07021	4.27122	4.33773	4.38461	4.32691	4.4082	4.57112	4.50486	4.54888	4.68231	3.91728	3.95985	3.99518	4.11249	20.4596	0.322925
ENSMUSG00000007850	9.11083	9.08291	9.0317	9.13491	8.9789	9.31873	9.30376	9.23836	9.28225	8.98341	9.1359	9.32557	9.23221	9.21247	9.39759	9.31312	9.2686	10.0058	9.64089	9.62785	10.0012	9.30998	9.70733	9.02863	9.13467	9.12768	9.15848	8.98974	9.21323	9.10911	9.05039	9.0082	8.64134	8.49216	8.63424	9.07515	9.0569	9.28695	9.13386	9.25675	9.32644	9.75819	9.67285	9.09699	9.12048	9.0559	8.58925	537.93	-0.0308778
ENSMUSG00000007867	6.68865	6.67985	6.68288	6.69002	6.68708	6.46274	6.53845	6.50717	6.72104	6.63258	6.58349	6.88492	6.91727	6.98287	6.99302	6.90065	6.98081	7.02841	6.86956	6.96565	6.78085	6.84034	6.961	6.36758	6.42833	6.441	6.17399	6.40627	6.44371	6.62214	6.4265	6.69461	6.71467	6.64065	6.77006	6.6838	6.68855	6.50279	6.6457	6.92835	6.95816	6.95454	6.86073	6.41231	6.34132	6.58109	6.70846	102.943	0.012602
ENSMUSG00000007872	9.05685	9.16934	9.11287	9.08654	9.16887	8.90362	8.92808	8.95542	8.73378	8.83702	9.27636	8.90651	9.18609	9.30077	8.76048	8.9799	9.13679	8.66039	8.83951	9.0191	8.6625	8.8584	8.9109	7.95766	7.91934	8.20207	7.86561	8.25234	8.43804	8.33818	8.43093	8.65621	9.50581	9.27483	9.14995	9.11302	9.1277	8.92904	8.94906	9.13112	8.95906	8.83967	8.8106	8.02636	8.18533	8.47511	9.3102	556.522	0.0275191
ENSMUSG00000007880	8.56397	8.56541	8.49362	8.49515	8.43786	8.61311	8.40545	8.51102	8.46068	8.46095	8.63111	8.93416	8.83341	8.84115	8.89485	8.79772	8.84019	9.33302	8.94611	8.88808	9.34633	8.99414	8.85071	8.68398	8.76483	8.50197	8.80157	8.6139	8.56828	8.75766	8.50392	8.72815	8.35831	8.13469	8.09224	8.541	8.4665	8.50986	8.51758	8.86957	8.84425	9.05574	9.06372	8.65026	8.66125	8.66324	8.19508	365.582	-0.1429
ENSMUSG00000007888	3.36366	3.38381	3.3902	3.35067	3.35216	3.82595	3.72611	3.78671	3.75035	3.94165	3.87173	3.87875	3.88662	3.74756	3.72322	3.79313	3.90591	3.77727	3.96932	4.09445	3.83804	4.17838	3.95363	3.81135	3.83017	3.76855	3.89868	3.70679	3.69021	4.20306	4.51458	4.33992	4.57874	4.80298	4.83531	3.37923	3.35142	3.77959	3.85458	3.83764	3.80742	3.94701	3.99002	3.80336	3.76523	4.35252	4.73901	10.3509	-0.359556
ENSMUSG00000007891	9.81078	9.89736	10.1996	10.0034	10.2629	9.91348	10.0033	10.0039	9.88606	10.1882	10.1962	9.98585	10.518	10.3714	10.2128	10.2978	10.4693	10.4011	10.2574	10.5247	10.2404	10.8374	10.606	10.439	10.452	10.4765	10.3871	10.395	10.5405	10.4392	10.7226	10.6429	11.0117	11.0742	11.1786	9.96924	10.1332	9.97356	10.0902	10.2918	10.3266	10.3944	10.5612	10.4558	10.4408	10.6016	11.0882	1065.78	0.266308
ENSMUSG00000007892	6.01648	6.0303	6.27107	5.99862	6.12057	6.08575	6.03142	6.15287	6.09113	6.15039	6.34001	6.26951	6.57133	6.72876	6.26113	6.39518	6.5881	6.31027	6.14369	5.98782	6.09061	6.30334	6.13783	5.49001	5.55172	5.52269	5.617	5.58252	5.3224	6.12685	6.0802	6.31567	6.02538	6.08526	6.33773	6.10595	6.0596	6.09001	6.19384	6.5232	6.4148	6.14726	6.17726	5.52147	5.50731	6.17424	6.14945	68.4633	-0.16478
ENSMUSG00000007908	5.14599	5.21372	5.18932	5.19788	5.2242	5.21988	5.49533	5.32579	5.37663	5.5201	5.34088	5.67599	5.61574	5.58929	5.54549	5.70031	5.51898	5.70498	5.67033	5.4527	5.82403	5.60092	5.65638	5.56172	5.55268	5.60317	5.38288	5.53937	5.54297	5.56583	5.63848	5.53198	6.09221	6.07769	5.97705	5.18301	5.21104	5.347	5.41254	5.627	5.58826	5.60934	5.69378	5.57252	5.4884	5.57876	6.04898	36.5977	0.131698
ENSMUSG00000007944	4.32374	4.52404	4.27501	4.28749	4.21991	4.9608	5.0179	5.0843	4.82481	5.17698	4.7539	5.98151	5.91758	5.52434	5.7084	5.75713	5.87994	5.69392	6.30116	6.10627	6.18687	6.29889	5.98215	5.92902	5.85803	5.70032	5.91183	5.87422	5.49637	6.33227	6.314	5.85432	6.08223	6.27517	6.07669	4.37426	4.2537	5.021	4.91856	5.80781	5.78182	6.03379	6.15597	5.82912	5.7608	6.16686	6.1447	20.9269	-0.954436
ENSMUSG00000007950	7.15219	7.33483	7.35768	7.18327	7.31009	7.4026	7.63377	7.54912	7.46972	7.84812	7.74927	7.70519	7.85187	7.64453	7.64953	7.70174	7.70973	7.6443	8.03429	7.98842	7.83632	8.01799	8.04145	7.20473	7.21059	7.16587	7.23134	7.13301	7.10891	7.69855	7.71154	7.64344	7.51541	7.53712	7.62483	7.28157	7.24668	7.5285	7.68904	7.73387	7.687	7.889	7.96526	7.19373	7.15775	7.68451	7.55912	154.704	-0.0822874
ENSMUSG00000007987	7.74789	7.72869	7.65076	7.82362	7.66468	7.79825	7.66273	7.672	7.77511	7.57605	7.60451	8.03685	7.89527	8.03129	7.988	8.10279	7.9977	8.25897	8.23546	8.19491	8.2245	8.10011	8.21006	7.66026	7.65563	7.68532	7.67677	7.78743	7.67359	7.83447	7.84718	7.88081	8.04962	7.91301	7.96668	7.70911	7.74415	7.71099	7.65189	7.9878	8.02949	8.22978	8.17822	7.66707	7.7126	7.85415	7.97643	212.133	0.0748382
ENSMUSG00000007989	8.33184	8.19828	8.15716	8.40068	8.35382	8.21429	8.00696	8.236	8.14073	8.36577	8.22731	8.74855	8.91768	8.63563	8.92411	8.76096	8.92526	9.01287	9.02891	9.39087	9.11108	9.53356	9.25026	9.41389	9.11673	9.31182	9.4457	9.0594	9.17618	9.28329	9.74006	9.38524	9.48685	9.85717	9.67229	8.22909	8.37725	8.15242	8.2446	8.76729	8.87011	9.14422	9.2983	9.28082	9.22709	9.46953	9.6721	314.376	0.281556
ENSMUSG00000008035	10.3766	10.4851	10.5489	10.5158	10.6232	10.3765	10.5347	10.3707	10.3844	10.6008	10.6339	10.4717	10.6463	10.758	10.4865	10.4572	10.518	10.6141	10.4702	10.4821	10.3916	10.2905	10.5755	9.59588	9.83693	9.78645	9.60993	9.67836	10.1312	9.83855	9.87397	10.0199	9.45165	9.48604	9.53155	10.4702	10.5695	10.4273	10.5397	10.6253	10.4872	10.5221	10.4192	9.73975	9.80649	9.91079	9.48975	1462.98	0.163193
ENSMUSG00000008036	9.7429	9.76335	9.60264	9.68865	9.49527	9.83812	9.64994	9.678	9.69184	9.57595	9.4703	9.95568	9.80415	9.86738	9.90031	9.86341	9.91005	9.97703	10.3325	10.2451	10.0744	10.2732	10.1623	9.80339	9.77343	9.74989	9.74062	9.89373	9.85395	10.0718	10.0583	9.90372	10.338	10.2419	10.1921	9.70297	9.59196	9.72202	9.57937	9.87574	9.89126	10.1849	10.17	9.77557	9.82943	10.0113	10.2573	813.064	-0.189697
ENSMUSG00000008090	9.13689	9.2848	9.29781	9.1774	9.33307	9.2564	9.33088	9.20405	9.13474	9.52761	9.35637	9.15304	9.53428	9.52917	9.35095	9.40155	9.3508	9.38061	9.64133	9.71378	9.29134	9.91596	9.85586	9.31493	9.26253	9.28505	9.3903	9.35913	9.69283	9.14719	9.44987	9.49316	9.4287	9.62333	9.80278	9.23983	9.25523	9.26378	9.33957	9.4055	9.36777	9.57857	9.68772	9.28751	9.48075	9.36341	9.61827	608.901	0.0297713
ENSMUSG00000008129	NA	NA	NA	NA	NA	2.86854	2.97418	2.89334	2.94216	2.86284	2.88135	2.81319	2.69024	2.7099	2.76811	2.78701	2.82754	3.78852	3.76359	3.59351	3.80033	3.70319	3.72155	2.68684	2.6503	2.74135	2.78257	2.64697	2.64694	2.44974	2.61308	2.49386	2.48134	2.58742	2.66343	NA	NA	2.91202	2.89545	2.73777	2.79422	3.71521	3.74169	2.69283	2.69216	2.5189	2.57739	NA	NA
ENSMUSG00000008136	4.5338	4.5302	4.50829	4.45065	4.41043	5.14342	4.92374	4.98807	4.97689	5.03996	4.82967	5.95514	5.60099	5.30576	5.72091	5.75823	5.78691	6.08916	6.30311	6.17005	6.35077	6.03632	6.14114	5.91702	5.74678	5.81868	5.87833	5.87785	5.49187	6.1687	6.01608	5.86546	6.26307	6.13283	6.0448	4.5241	4.43054	5.01841	4.94884	5.62063	5.75535	6.18744	6.17608	5.82749	5.74935	6.01675	6.1469	22.6849	-0.65226
ENSMUSG00000008140	8.5804	8.73651	8.78032	8.54327	8.79736	8.51216	8.69467	8.6706	8.52209	8.89466	8.71616	8.79848	9.20611	8.88769	8.86869	8.9259	9.02016	9.01315	9.34265	9.37251	9.13979	9.57732	9.39016	8.98617	8.80156	8.77408	8.95868	8.72265	8.79208	9.01185	9.31421	9.22297	8.93981	8.92819	9.19697	8.69908	8.67032	8.62581	8.71097	8.9641	8.93825	9.24277	9.36909	8.85394	8.82447	9.18301	9.02166	414.663	-0.0424056
ENSMUSG00000008153	9.57413	9.56221	9.15356	9.15773	9.16612	9.81785	10.0842	9.95268	9.86158	10.1323	9.46759	10.515	10.5339	9.68149	10.3931	10.4941	10.5057	10.7724	11.1087	11.2671	11.1624	11.4504	11.0364	11.4595	11.1537	11.2314	11.4574	10.9521	10.5505	11.3763	11.6024	11.0606	10.9558	11.2067	11.1461	9.42997	9.16193	9.95159	9.82049	10.2435	10.4643	11.0494	11.2164	11.2816	10.9866	11.3464	11.1028	656.097	-0.503498
ENSMUSG00000008167	3.22108	3.22716	3.33491	3.24393	3.23889	3.54988	3.67435	3.55669	3.61673	3.68311	3.66026	3.77948	3.89549	3.92402	3.77495	3.8375	3.90932	3.30759	3.4723	3.39476	3.29042	3.40547	3.46624	2.55746	2.56579	2.53037	2.69995	2.60352	2.63163	3.60032	3.53752	3.44592	3.77136	3.58935	3.77371	3.26105	3.24141	3.59364	3.65337	3.86633	3.84059	3.39155	3.38738	2.55121	2.64503	3.52792	3.71147	9.5624	-0.289175
ENSMUSG00000008200	6.76689	6.82332	6.63913	6.73272	6.6086	6.791	6.86056	6.6885	6.96711	6.80641	6.82636	7.05893	7.00228	7.07489	7.15807	6.89945	7.15862	7.62994	7.17376	7.23326	7.48002	7.30338	7.30143	7.10802	7.08937	7.08608	7.02548	6.93861	7.12358	6.89147	6.5749	6.78699	6.70577	6.7346	6.6842	6.74311	6.67066	6.78002	6.86663	7.04537	7.07205	7.34566	7.36161	7.09449	7.02922	6.75112	6.70819	105.933	-0.199996
ENSMUSG00000008206	7.33855	7.37922	7.31452	7.25835	7.51389	7.30627	7.52656	7.46515	7.42973	7.64242	7.45487	7.61233	7.80011	7.68199	7.75577	7.67768	7.85679	7.83309	8.02765	8.05391	7.93103	8.2552	8.06351	7.58548	7.59857	7.6976	7.73903	7.56128	7.67054	7.69448	7.95354	7.87076	8.13845	8.37688	8.52035	7.3441	7.38612	7.43266	7.509	7.69814	7.76341	7.97155	8.08325	7.62722	7.65695	7.83959	8.34523	164.931	0.118897
ENSMUSG00000008226	7.16165	7.11766	7.07729	7.25532	7.11823	7.37225	7.15558	7.14659	7.27856	7.09236	7.12367	7.43348	7.32726	7.29797	7.39724	7.33139	7.25229	7.77056	7.52821	7.55705	7.69939	7.32148	7.48658	7.25561	7.37305	7.52682	7.25761	7.33329	7.60821	7.10741	7.26171	7.09074	7.24466	7.10732	7.16207	7.11887	7.18677	7.22481	7.16486	7.3529	7.32697	7.61861	7.50248	7.38516	7.3997	7.15329	7.17135	142.231	0.160921
ENSMUSG00000008301	7.7579	7.86827	7.69336	7.7862	7.63666	7.78893	7.75979	7.83534	7.86056	7.72615	7.80871	8.03295	8.02244	8.21106	7.9573	8.02848	8.06115	8.45974	8.24409	8.27413	8.34595	8.13173	8.28886	7.88017	7.89915	7.80001	7.83596	7.98133	7.98228	7.97456	7.85918	8.09919	8.03393	7.80629	7.85792	7.77318	7.71143	7.79469	7.79847	8.08882	8.01564	8.32599	8.25551	7.85978	7.93319	7.97764	7.89938	216.36	-0.133918
ENSMUSG00000008305	7.65477	7.63504	7.81219	7.71509	7.83251	7.80756	7.96216	7.84922	7.71581	7.87856	7.91201	7.97224	7.73804	7.94967	7.78745	7.84712	7.68745	8.03017	7.80588	7.73241	7.9198	7.61876	7.90687	7.42402	7.59261	7.53328	7.45106	7.8177	7.83965	7.58563	7.51348	7.73924	8.04871	7.91856	7.82594	7.70067	7.7738	7.87298	7.83546	7.88665	7.77401	7.85615	7.81514	7.51664	7.7028	7.61278	7.93107	212.905	0.153128
ENSMUSG00000008318	5.62311	5.49478	5.45323	5.5453	5.36302	5.64677	5.81842	5.65573	5.84698	5.88489	5.75078	6.04937	6.17878	5.89944	6.02335	5.88392	5.93278	6.07241	6.04439	6.04983	6.1465	6.4259	6.26527	6.13027	6.08904	6.02475	6.20412	6.14439	6.08174	6.14033	6.21458	6.36761	6.88291	6.8147	7.02587	5.52371	5.45416	5.70697	5.82755	6.04253	5.94668	6.05554	6.27923	6.08135	6.14342	6.24084	6.90782	45.9581	-0.288851
ENSMUSG00000008333	7.30961	7.26158	7.39755	7.38581	7.30918	7.42876	7.20415	7.25464	7.37315	7.04672	7.14517	7.57663	7.37394	7.64453	7.55622	7.41695	7.59904	8.01256	7.61988	7.44209	7.84121	7.36352	7.57958	7.67991	7.74271	7.57623	7.81432	7.92006	7.61114	7.35815	7.34476	7.40451	7.6612	7.38439	7.30973	7.32291	7.34749	7.29585	7.18835	7.5317	7.52407	7.69151	7.59477	7.66628	7.78184	7.36914	7.45177	161.535	0.0502735
ENSMUSG00000008348	10.2332	10.3694	10.2461	10.3394	10.007	10.4243	10.2426	9.75354	10.4556	10.0344	10.1121	10.2929	10.2819	10.051	10.4606	10.199	10.3209	11.2481	10.4839	10.477	11.0027	10.5521	10.6608	9.9636	10.1369	10.1019	10.1217	10.0381	10.2535	10.0375	9.91058	10.1099	10.1601	10.0867	9.8383	10.2829	10.1732	10.1402	10.2007	10.2086	10.3268	10.7363	10.7385	10.0675	10.1378	10.0193	10.0284	1219.58	-0.166672
ENSMUSG00000008373	7.08208	7.03691	7.17328	7.15998	7.08109	7.31038	7.18258	7.2406	7.26936	7.16509	7.29171	7.49236	7.28746	7.44262	7.45622	7.33648	7.38965	7.44914	7.4516	7.22758	7.36783	7.23269	7.39622	6.90796	7.00076	7.16075	6.96597	7.02793	7.24061	7.03917	6.71904	7.05907	6.94076	6.81844	6.74899	7.09742	7.12054	7.24452	7.24205	7.40748	7.39412	7.37611	7.33225	7.02316	7.07817	6.93909	6.83607	138.131	0.049238
ENSMUSG00000008384	4.63803	4.6364	4.50823	4.53814	4.55525	4.49502	4.56772	4.54025	4.4422	4.52976	4.53194	4.69777	4.62012	4.58228	4.57345	4.63092	4.59394	4.53418	4.87361	4.59464	4.60795	4.81957	4.82289	3.78574	3.66726	3.87757	3.78786	4.04233	3.89527	4.60035	4.46785	4.39575	4.91351	4.82729	4.8181	4.59422	4.5467	4.53433	4.5013	4.63339	4.59944	4.66747	4.75014	3.77686	3.90849	4.48798	4.85297	24.0758	-0.313887
ENSMUSG00000008393	5.61235	5.75045	5.93824	5.77498	5.81686	5.82499	5.80695	5.86989	5.68546	5.74998	6.00178	5.93569	6.21428	6.07667	5.89769	5.96171	6.06652	5.77638	5.78763	5.99076	5.75982	5.93818	5.87136	5.28942	5.36147	5.41216	5.17107	5.15925	5.33519	5.66304	5.72433	5.9145	5.98766	6.13685	6.08473	5.76702	5.79592	5.83394	5.81241	6.07555	5.97531	5.85159	5.85645	5.35435	5.22183	5.76729	6.06975	55.3982	0.0733939
ENSMUSG00000008398	4.34798	4.43717	4.31153	4.33412	4.46294	4.4735	4.53326	4.43104	4.38902	4.53631	4.48813	4.65283	4.86428	4.70556	4.62845	4.68622	4.72443	4.56522	4.57718	4.5592	4.39548	4.66984	4.68458	4.18055	3.95765	3.96514	4.09002	4.07518	3.89694	4.39371	4.36752	4.32363	4.62823	4.77582	4.87385	4.36556	4.39853	4.47927	4.47116	4.74089	4.6797	4.5672	4.5833	4.03445	4.02072	4.36162	4.7593	20.8312	0.240164
ENSMUSG00000008429	8.68037	8.66223	8.70689	8.65342	8.71067	8.68613	8.73921	8.76824	8.77715	8.71746	8.75552	8.78566	8.9396	8.98104	9.07335	8.87079	8.95218	9.13406	8.99778	8.98767	8.99706	8.87917	9.03355	8.51923	8.55828	8.49866	8.50992	8.50403	8.68561	8.4886	8.56805	8.60011	8.79314	8.6931	8.5293	8.68316	8.68205	8.73119	8.75004	8.9021	8.96544	9.03984	8.96993	8.52539	8.56652	8.55225	8.67185	410.943	-0.000562955
ENSMUSG00000008435	5.30457	5.26216	5.34416	5.2648	5.34084	5.26042	5.32986	5.41748	5.40543	5.47572	5.62287	5.53174	5.1962	5.59514	5.54481	5.52817	5.36141	5.35267	5.17226	5.27629	5.17961	5.2634	5.25966	4.57056	4.6491	4.41987	4.50702	4.54801	4.69094	4.80957	4.8266	4.83036	4.70619	4.75877	4.74657	5.30363	5.30282	5.33592	5.50134	5.44103	5.47813	5.26707	5.23422	4.54651	4.58199	4.82218	4.73718	39.3992	0.000711085
ENSMUSG00000008475	7.1769	7.21171	7.10882	7.19972	7.0467	7.03274	7.01227	7.09924	7.09403	7.13653	6.9552	7.64129	7.61028	7.43237	7.52591	7.56078	7.66851	7.76647	7.90024	7.67453	7.88433	7.94212	7.81569	7.63954	7.60622	7.55849	7.61013	7.76023	7.57553	7.94728	7.98498	7.81296	8.72006	8.66195	8.41245	7.16581	7.12321	7.04809	7.06192	7.56131	7.58506	7.78042	7.88071	7.60142	7.64863	7.91507	8.59815	142.656	-0.1021
ENSMUSG00000008489	6.6055	6.52608	6.16152	6.47907	6.27939	6.8889	6.97838	6.88778	6.97162	6.7152	6.46512	7.51306	6.86313	6.58777	7.37212	7.18594	7.06169	7.81279	7.8035	7.73294	7.88343	7.61189	7.63111	7.60437	7.39939	7.41143	7.58991	7.48893	7.00862	7.51105	7.60934	7.19435	7.16439	6.99641	7.20632	6.43103	6.37923	6.91836	6.71731	6.98799	7.20658	7.78308	7.70881	7.47173	7.36249	7.43825	7.12237	87.789	-0.185828
ENSMUSG00000008540	9.69901	9.71507	9.72826	9.66023	9.67593	9.41752	9.03885	9.34107	9.13263	9.27511	9.20464	9.52351	9.59408	9.84798	9.64455	9.65305	9.80332	9.64438	9.6375	9.68593	9.42245	9.79368	9.66339	9.26478	9.32523	9.17657	9.18159	9.57102	9.43955	9.2831	9.37475	9.61242	10.0609	10.0383	10.0797	9.71411	9.66808	9.26581	9.20413	9.65519	9.70031	9.65594	9.62651	9.25553	9.39739	9.42342	10.0597	829.564	-0.0791183
ENSMUSG00000008575	9.95834	9.97516	9.9804	10.0688	10.0306	10.0194	9.8805	9.96237	9.95597	9.86931	10.006	10.1317	10.0658	10.2134	10.1118	10.1571	10.0967	10.2446	10.0926	10.0409	10.0982	9.90909	10.1125	9.54516	9.73401	9.77799	9.66544	9.66888	9.89264	9.59099	9.60096	9.69179	9.59043	9.58022	9.4736	9.9713	10.0497	9.9541	9.94376	10.137	10.1219	10.126	10.0399	9.68572	9.74232	9.62791	9.54808	1026.83	0.13222
ENSMUSG00000008604	7.59242	7.63247	7.63964	7.45987	7.64628	7.63391	7.66839	7.65759	7.61118	7.76278	7.72085	8.05211	8.18967	7.97124	8.13551	8.01705	8.0964	8.13971	8.25919	8.2881	8.19768	8.39557	8.34243	7.87802	7.838	7.78324	7.77629	7.8582	7.65676	8.1028	7.97866	8.02435	7.67551	7.68034	7.7353	7.62151	7.55308	7.6533	7.69827	8.07101	8.08299	8.229	8.3119	7.83308	7.76375	8.03527	7.69705	193.646	-0.134531
ENSMUSG00000008658	7.21789	7.06898	6.83812	6.79468	6.69375	7.5553	7.59459	7.53868	7.61441	7.59411	7.15141	8.18962	7.90609	7.33565	7.8198	7.93114	7.92573	8.60079	8.77173	8.60272	8.89945	8.6257	8.615	8.38306	8.30759	8.21923	8.34142	8.23409	7.7134	8.61814	8.72574	8.29179	8.27145	8.13628	7.95066	7.04166	6.74422	7.56285	7.45331	7.81045	7.89223	8.65841	8.71338	8.30329	8.0963	8.54522	8.11947	125.662	-0.791793
ENSMUSG00000008668	4.18818	4.17815	4.24838	4.19709	4.16323	4.56641	4.76184	4.65695	4.68103	4.76326	4.82092	4.82659	5.10913	5.07211	4.77105	4.76688	4.95091	5.31492	5.17978	4.99504	5.07866	5.20491	5.09717	4.08787	4.05361	3.85053	3.9331	4.26461	4.09496	4.77634	4.48154	4.5304	4.5782	4.63008	4.65907	4.20491	4.18016	4.66173	4.75507	5.00261	4.82961	5.16325	5.12691	3.99734	4.09756	4.59609	4.62245	18.3824	-0.203356
ENSMUSG00000008683	6.682	6.67816	6.66289	6.74894	6.73829	6.7106	6.69095	6.97643	6.63262	6.48035	6.74238	7.23192	7.12604	7.41351	7.00671	7.16585	7.39785	7.80244	7.27501	7.29567	7.57081	7.28713	7.30396	7.37568	7.42431	7.19555	7.42368	7.63867	7.31913	7.57618	7.34435	7.54729	7.55238	7.05765	6.99915	6.67435	6.74361	6.79266	6.61845	7.25716	7.19014	7.45771	7.3873	7.33185	7.46049	7.48927	7.20306	104.197	0.184326
ENSMUSG00000008690	7.16733	7.42328	7.36766	7.27935	7.31554	7.32467	7.39201	7.25399	7.44532	7.43845	7.46016	7.6946	7.82986	7.5798	7.56746	7.69044	7.59785	7.44264	7.61626	7.56767	7.60535	7.66456	7.58601	7.16061	7.29706	7.287	7.14217	7.17769	7.04378	7.45768	7.42875	7.3776	7.52706	7.39403	7.4584	7.31942	7.29745	7.32356	7.44797	7.70142	7.61858	7.54219	7.61864	7.24822	7.12121	7.42135	7.45983	159.613	-0.0618222
ENSMUSG00000008730	9.31956	9.32335	9.35894	9.35214	9.47538	9.31507	9.32087	9.22245	9.37381	9.35742	9.21139	9.55228	9.85496	9.53239	9.59241	9.68091	9.71948	9.5871	9.58771	9.81895	9.48589	9.90332	9.75638	9.53532	9.4441	9.64456	9.5038	9.43969	9.55036	9.41605	9.52858	9.94373	10.0933	10.1637	10.076	9.33395	9.41376	9.28613	9.3142	9.64654	9.66427	9.66459	9.7152	9.54133	9.49795	9.62945	10.111	660.778	0.144197
ENSMUSG00000008734	11.8352	11.9986	11.9819	12.0221	12.1386	11.8295	11.8591	11.7741	11.7557	11.9631	11.8814	11.8841	12.4169	12.2557	12.1533	12.0946	12.3118	12.1462	12.2157	12.5073	12.0459	12.6696	12.5242	12.0224	11.959	12.1144	12.0005	11.6104	12.21	11.8923	12.2422	12.4044	11.4759	11.8418	11.9586	11.9386	12.0803	11.8209	11.8668	12.1856	12.1866	12.2897	12.4132	12.032	11.9403	12.1796	11.7587	4102.53	0.226244
ENSMUSG00000008763	7.03724	6.95011	6.89478	6.95262	6.84819	7.03029	7.01667	7.09461	7.09935	7.06359	6.94342	7.84729	7.60607	7.51196	7.78861	7.72439	7.80115	8.00565	8.04497	8.10308	8.19937	8.29282	8.01142	8.47346	8.3443	8.41836	8.5536	8.25388	8.02402	8.35007	8.51206	8.25811	8.13744	8.41363	8.20554	6.96071	6.9004	7.04719	7.03545	7.65511	7.77138	8.05123	8.16787	8.41204	8.27716	8.37341	8.2522	123.159	-0.157053
ENSMUSG00000008822	8.16533	7.87112	7.84035	8.1152	7.83204	8.28634	7.6869	7.92079	7.99549	7.72774	7.6227	8.24475	8.01045	8.23939	8.45667	8.03013	8.262	8.53953	8.36334	8.29729	8.34057	8.25285	8.18625	8.13618	8.30837	8.29109	8.15679	8.43583	8.30991	8.04606	8.01016	8.1127	8.31549	8.08737	8.25907	7.95893	7.97362	7.96468	7.78198	8.16486	8.2496	8.40005	8.25989	8.24521	8.30084	8.05631	8.22064	253.862	0.0250023
ENSMUSG00000008845	NA	NA	NA	NA	NA	1.97746	1.96781	2.00694	1.95477	2.02154	2.01639	2.23556	2.30303	2.18079	2.23622	2.26625	2.31879	NA	NA	NA	NA	NA	NA	NA	NA	NA	NA	NA	NA	2.13234	2.18818	2.1751	2.29174	2.27177	2.30051	NA	NA	1.98407	1.99757	2.23979	2.27375	NA	NA	NA	NA	2.16521	2.28801	NA	NA
ENSMUSG00000008855	7.32136	7.36186	7.3283	7.27062	7.40872	7.23919	7.31768	7.26442	7.23969	7.39528	7.42291	7.58156	7.61656	7.47173	7.62227	7.59434	7.43204	7.42958	7.56078	7.4778	7.38795	7.63044	7.48637	6.79745	6.84316	6.94787	6.81207	6.87445	7.01763	7.3539	7.2004	7.26063	7.08959	7.20137	7.31861	7.33717	7.33967	7.27377	7.35263	7.55662	7.54955	7.48939	7.50158	6.86283	6.90138	7.27164	7.20319	161.878	0.0158716
ENSMUSG00000008859	8.36648	8.42795	8.30595	8.46802	8.28166	8.35439	8.15121	8.29903	8.41597	8.19903	8.17811	8.62499	8.56599	8.7236	8.72535	8.5554	8.59947	8.9135	8.68293	8.67226	8.78387	8.56731	8.70116	8.35354	8.41707	8.45895	8.25638	8.42157	8.5448	8.47091	8.431	8.48993	8.54606	8.5942	8.58999	8.3668	8.37484	8.26821	8.26437	8.63819	8.62674	8.75623	8.68411	8.40985	8.40758	8.46395	8.57675	332.235	0.0179197
ENSMUSG00000008892	7.34092	7.26246	7.20739	7.40609	7.16521	7.49621	7.16439	7.33149	7.26243	7.13	7.06545	7.55612	7.29038	7.34534	7.64185	7.46917	7.48834	7.85536	7.82097	7.73197	7.75278	7.48154	7.77294	7.47995	7.33193	7.55535	7.48774	7.40267	7.50687	7.52897	7.39179	7.29725	7.55006	7.42059	7.50891	7.27026	7.28565	7.3307	7.15263	7.39728	7.53312	7.80277	7.66909	7.45574	7.46576	7.406	7.49319	156.337	0.0423465
ENSMUSG00000008958	6.43921	6.39725	6.40028	6.36149	6.44878	6.52147	6.45305	6.39297	6.70596	6.49537	6.57854	6.46218	6.56552	6.66863	6.55203	6.6049	6.56233	6.76054	6.80836	6.78602	6.71678	6.59952	6.90778	5.80641	5.90694	6.05055	5.91695	5.86018	6.12772	6.17841	6.15417	6.15704	6.24476	6.11675	6.21759	6.41224	6.40514	6.45583	6.59329	6.56544	6.57309	6.78497	6.74136	5.9213	5.96828	6.16321	6.19303	84.9608	-0.014031
ENSMUSG00000008976	8.47311	8.44826	8.51794	8.57489	8.44158	8.60808	8.4666	8.39237	8.50371	8.34728	8.51597	8.59766	8.69282	8.75878	8.72874	8.59764	8.68022	9.0682	8.63062	8.64848	8.83856	8.51621	8.74229	8.03821	8.18782	8.19197	8.20574	8.28219	8.34933	8.20684	8.16293	8.43506	8.28976	8.06599	8.07459	8.47977	8.50824	8.48902	8.45565	8.68309	8.66887	8.78244	8.69902	8.13933	8.27908	8.26828	8.14345	360.519	0.0537249
ENSMUSG00000008999	6.01838	5.99921	6.2174	6.11955	6.20331	6.3683	6.41613	6.27054	6.24995	6.39584	6.40672	6.21268	6.46402	6.35157	6.20796	6.32506	6.19142	6.4215	6.48931	6.66734	6.33846	6.54044	6.46526	5.89431	5.99791	5.92988	6.10135	6.12825	6.30665	5.5727	5.87169	6.03257	5.94492	6.11965	6.02916	6.07833	6.16143	6.35166	6.35084	6.34275	6.24148	6.52605	6.44806	5.9407	6.17875	5.82566	6.03124	69.4139	0.252464
ENSMUSG00000009013	9.67126	9.72178	9.58472	9.6793	9.58376	10.0508	10.3079	10.0989	10.2838	10.1924	9.90857	10.4515	10.5643	10.2151	10.4926	10.4655	10.5883	10.7997	10.7071	10.798	10.6853	10.7627	10.7581	10.3917	10.4396	10.326	10.3931	10.5985	10.1514	10.6749	10.4938	10.7565	10.6863	10.6531	10.6432	9.65925	9.63153	10.1525	10.1282	10.4103	10.5155	10.7683	10.7354	10.3858	10.381	10.6417	10.6609	804.008	-0.0493714
ENSMUSG00000009030	8.0042	8.08302	7.92349	8.19679	7.90722	8.07697	7.6893	7.76678	7.94787	7.82547	7.85215	8.25647	8.06036	8.23282	8.45664	8.0036	8.06928	8.46556	8.20777	8.17922	8.31365	7.9763	8.12683	7.9375	7.90281	7.96342	7.92704	7.97919	8.33212	7.84535	7.73386	7.74173	7.64062	7.72581	7.69608	8.00357	8.052	7.84435	7.87516	8.18322	8.17651	8.28419	8.13893	7.93458	8.07945	7.77365	7.6875	262.605	0.109087
ENSMUSG00000009035	6.79122	6.92209	7.10002	6.90507	7.18508	6.86688	7.06101	7.04121	6.9159	7.18552	7.02278	7.42138	7.64828	7.37392	7.19968	7.5934	7.37857	7.18593	7.4851	7.71831	7.37139	7.84717	7.62658	7.2025	6.98282	7.02363	7.0114	6.98861	7.09928	7.29789	7.59481	7.40405	7.05385	7.51942	7.47171	6.93778	7.04508	6.9897	7.0414	7.48119	7.39055	7.46311	7.61505	7.06965	7.0331	7.43225	7.34833	127.764	0.26886
ENSMUSG00000009070	2.72342	2.66856	2.61817	2.64491	2.64481	3.09545	2.99577	3.15731	2.98951	3.06362	3.07855	3.24805	3.42481	3.30338	3.19681	3.30321	3.26855	3.14043	3.102	3.22995	3.1995	3.19439	3.11411	NA	NA	NA	NA	NA	NA	NA	NA	NA	NA	NA	NA	2.67005	2.64486	3.08284	3.04389	3.32541	3.25619	3.15746	3.16933	NA	NA	NA	NA	6.43264	-0.524844
ENSMUSG00000009073	7.21648	7.16093	7.21577	7.17618	7.19937	7.2416	7.21477	7.18647	7.11424	7.11453	7.16402	7.46044	7.50042	7.45616	7.39373	7.36863	7.4615	7.572	7.41036	7.53004	7.46618	7.46166	7.51055	7.12255	7.04434	7.15729	7.0235	7.16872	7.24651	7.24494	7.09391	7.31412	7.71766	7.56083	7.5948	7.19773	7.18777	7.21428	7.13093	7.47234	7.40795	7.50414	7.47946	7.10806	7.14624	7.21765	7.62443	146.397	-0.0236533
ENSMUSG00000009075	3.79537	3.87488	3.75384	3.82388	3.76737	3.3197	3.35577	3.5135	3.35757	3.35132	3.49717	4.2936	4.18642	4.06323	4.20531	4.32699	4.25386	4.71439	4.96451	4.72962	4.84041	5.19118	4.90821	4.57877	4.64815	4.87203	4.81928	4.99285	4.69718	5.66575	5.84551	5.18678	6.90413	6.46923	6.64046	3.80803	3.79562	3.39632	3.40202	4.18108	4.26205	4.80284	4.97993	4.69965	4.83643	5.56601	6.67127	14.2064	-0.132166
ENSMUSG00000009076	6.95649	7.04897	7.05899	7.04819	6.95645	6.8912	6.75728	6.87341	6.95795	6.87009	6.98446	7.05812	6.97419	7.01256	6.99503	6.99181	6.89607	7.04851	7.01782	6.96336	6.95995	7.06172	7.09708	6.29486	6.38932	6.51529	6.38047	6.38621	6.60867	6.53628	6.62132	6.55044	6.76549	6.59026	6.73753	7.02148	7.00232	6.84063	6.9375	7.01496	6.96097	7.0099	7.03958	6.39982	6.45845	6.56935	6.69776	129.595	-0.0515004
ENSMUSG00000009079	6.43818	6.49263	6.41415	6.56506	6.45909	6.6446	6.79352	6.66854	6.89881	6.78453	6.79289	6.95145	6.87482	6.80412	6.91093	6.87677	6.73416	7.6287	7.21553	7.36614	7.80693	7.06838	7.53239	6.49194	6.62109	6.75461	6.7816	6.54695	6.95288	6.87329	6.76047	6.59924	6.9448	6.90517	6.95428	6.44832	6.51208	6.70222	6.82541	6.8768	6.84062	7.40345	7.46923	6.62255	6.76048	6.74433	6.93475	89.2642	0.180119
ENSMUSG00000009090	9.62357	9.55629	9.67328	9.63498	9.64754	9.74292	9.98238	9.74505	9.84099	9.71791	9.92285	9.88889	9.76718	9.82967	9.80391	9.84811	9.6854	10.0676	9.87281	9.76364	10.0809	9.50239	9.83576	8.87123	9.08239	9.04821	9.07473	9.05258	9.0697	9.27011	9.01943	9.06466	9.07968	8.99887	9.01693	9.61771	9.64126	9.82345	9.82725	9.82858	9.77914	9.90134	9.80634	9.00061	9.06567	9.11806	9.03183	791.346	0.0385334
ENSMUSG00000009092	NA	NA	NA	NA	NA	NA	NA	NA	NA	NA	NA	NA	NA	NA	NA	NA	NA	1.86848	1.86121	1.90781	1.82193	1.97942	1.96302	NA	NA	NA	NA	NA	NA	NA	NA	NA	NA	NA	NA	NA	NA	NA	NA	NA	NA	1.87917	1.92146	NA	NA	NA	NA	NA	NA
ENSMUSG00000009112	7.13924	7.02548	7.06859	7.15998	7.22432	7.07333	7.05528	7.14582	7.1444	7.02683	7.21087	7.35688	7.35923	7.27777	7.26632	7.4069	7.28603	7.38548	7.25209	7.2995	7.45726	7.22938	7.32396	6.7945	6.78548	6.69957	6.78407	6.76868	6.85115	6.83025	6.73785	6.87231	6.73387	6.82132	6.83587	7.07777	7.19215	7.09148	7.12736	7.3313	7.31975	7.31235	7.33686	6.75985	6.8013	6.81347	6.79702	139.775	0.273831
ENSMUSG00000009185	NA	NA	NA	NA	NA	NA	NA	NA	NA	NA	NA	NA	NA	NA	NA	NA	NA	NA	NA	NA	NA	NA	NA	NA	NA	NA	NA	NA	NA	1.83727	1.88826	1.8416	2.00998	2.14591	2.16529	NA	NA	NA	NA	NA	NA	NA	NA	NA	NA	1.85571	2.10706	NA	NA
ENSMUSG00000009207	7.95711	7.82981	7.65108	7.85931	7.8589	8.19021	7.91354	8.16405	8.12948	7.95104	7.77844	8.67711	8.4194	8.28307	8.73516	8.49781	8.68548	9.14516	9.07929	9.05462	9.25865	9.35694	8.9809	9.58989	9.49393	9.42141	9.58682	9.47707	9.04731	9.25994	9.56194	9.215	8.85834	9.11392	8.7855	7.81267	7.85911	8.08927	7.95299	8.45986	8.63948	9.09302	9.19883	9.50174	9.3704	9.34562	8.91925	229.353	0.08204
ENSMUSG00000009210	2.62947	2.69735	2.68903	2.62153	2.68153	2.22736	2.22033	2.25813	2.29325	2.17971	2.23436	2.71657	2.76208	2.71073	2.70565	2.73048	2.73799	2.75689	2.79078	2.82576	2.69903	2.76342	2.9682	1.65723	1.65078	1.75007	1.75795	1.69404	1.67267	NA	NA	NA	NA	NA	NA	2.67195	2.65153	2.23527	2.23577	2.72979	2.72471	2.79114	2.81022	1.68603	1.70822	NA	NA	6.30361	-0.398396
ENSMUSG00000009214	NA	NA	NA	NA	NA	NA	NA	NA	NA	NA	NA	NA	NA	NA	NA	NA	NA	NA	NA	NA	NA	NA	NA	NA	NA	NA	NA	NA	NA	1.44474	1.45283	1.44801	1.64953	1.72224	1.60338	NA	NA	NA	NA	NA	NA	NA	NA	NA	NA	1.44852	1.65839	NA	NA
ENSMUSG00000009216	4.65549	4.69298	4.60271	4.58391	4.67635	4.93122	5.09862	5.06642	5.11854	5.29996	5.03755	5.56272	5.59951	5.32379	5.23248	5.55261	5.66116	5.74155	5.99409	5.69136	5.88589	5.8891	5.76796	5.1326	5.10184	4.84881	5.12092	4.95628	4.84947	5.96806	5.95546	5.64337	5.69147	5.99669	5.76129	4.65039	4.63013	5.03209	5.15202	5.49534	5.48208	5.809	5.84765	5.02775	4.97556	5.85563	5.81648	24.9962	-0.114078
ENSMUSG00000009281	8.54995	8.64775	8.69119	8.57429	8.62816	8.58766	8.78811	8.71781	8.61411	8.76758	8.7969	8.61195	9.03772	8.88711	8.90551	8.90153	8.96425	8.7923	8.81704	8.99462	8.62618	9.03282	8.90147	8.36864	8.39744	8.1807	8.39369	8.47565	8.57537	8.51591	8.60756	8.66041	9.06709	9.26957	9.32947	8.62963	8.60123	8.69786	8.72619	8.84559	8.92376	8.86798	8.85349	8.31559	8.48157	8.59463	9.22204	393.495	-0.0548416
ENSMUSG00000009291	9.52218	9.56918	9.53704	9.51597	9.62245	9.43481	9.47938	9.45023	9.53044	9.65521	9.64435	9.52169	9.9793	9.79557	9.79216	9.74948	9.93086	9.90787	9.6753	9.96128	9.64685	9.97644	10.0411	9.92602	9.89043	9.94446	9.8917	9.7009	9.99858	9.62172	9.90154	10.0065	9.80502	10.0345	9.94423	9.5428	9.56921	9.45481	9.61	9.76552	9.82417	9.84815	9.88811	9.9203	9.86373	9.84325	9.92793	751.865	0.0494094
ENSMUSG00000009292	3.81883	3.77187	3.86314	3.75262	3.68906	3.98691	4.11115	4.15546	4.04601	4.20383	4.04601	4.5551	4.47322	4.26462	4.47563	4.58625	4.47158	4.84942	4.86952	4.92316	5.0452	4.9745	4.81857	4.52272	4.71513	4.76712	4.65565	4.6923	4.38575	5.13983	5.20285	4.91842	4.77227	4.94581	4.758	3.81795	3.72084	4.08451	4.09862	4.43098	4.51115	4.8807	4.94609	4.66832	4.5779	5.08703	4.82536	14.0041	-1.05364
ENSMUSG00000009293	4.78369	4.81055	4.86551	4.83133	4.86803	4.98209	5.06355	5.13816	4.89636	5.01386	4.89168	5.35731	5.29564	5.40622	5.30345	5.33154	5.36092	5.35853	5.66911	5.34691	5.41351	5.43371	5.32501	4.55515	4.52944	4.45802	4.5477	4.59989	4.68973	5.40111	5.76412	5.34715	5.61399	5.43547	5.34104	4.81991	4.84968	5.06127	4.93397	5.35305	5.33197	5.45819	5.39074	4.51421	4.61244	5.50413	5.4635	28.4153	0.164072
ENSMUSG00000009356	6.15874	6.20476	6.2189	6.19472	6.21123	6.06419	5.978	5.96869	6.06937	6.04458	6.15571	6.24599	6.51336	6.45094	6.51541	6.40071	6.54852	6.22798	6.13893	6.27541	5.96995	6.6338	6.18308	6.06545	5.97151	6.0219	6.06233	5.98059	6.14349	5.90762	6.30709	6.07974	6.07562	6.17023	6.3026	6.19413	6.20298	6.00363	6.08988	6.40343	6.48821	6.21411	6.26228	6.01962	6.06214	6.09815	6.18281	73.3845	0.027376
[truncated: 13,859 more rows]
[truncated: 22 more columns]
