# Supplementary material for: Ribosomal profiling during prion disease uncovers progressive translational derangement in glia but not in neurons
Source: eLife. 2020 Sep 22;9:e62911. doi: 10.7554/eLife.62911 (PMC7527237; doi:10.7554/eLife.62911)
Supplement: Supplementary file 10. — Genes decreasing and increasing in astrocytes, microglia and in both cell types were compared to respectively expressed genes. [file elife-62911-supp10.xlsx]

## Sheet: GFAP_down_GOprocess
GO Term	Description	P-value	FDR q-value	Enrichment	N	B	n	b	Genes
GO:0016126	sterol biosynthetic process	2.98e-12	4.31e-08	25.35	12888	31	164	10	[Fdft1 - farnesyl diphosphate farnesyl transferase 1, Mvd - mevalonate (diphospho) decarboxylase, Cyp51 - cytochrome p450, family 51, Insig1 - insulin induced gene 1, Nsdhl - nad(p) dependent steroid dehydrogenase-like, Sqle - squalene epoxidase, Cyp26b1 - cytochrome p450, family 26, subfamily b, polypeptide 1, Dhcr7 - 7-dehydrocholesterol reductase, Tm7sf2 - transmembrane 7 superfamily member 2,…
GO:0006694	steroid biosynthetic process	1.13e-10	8.16e-07	15.17	12888	57	164	11	[Fdft1 - farnesyl diphosphate farnesyl transferase 1, Mvd - mevalonate (diphospho) decarboxylase, Cyp51 - cytochrome p450, family 51, Insig1 - insulin induced gene 1, Sqle - squalene epoxidase, Nsdhl - nad(p) dependent steroid dehydrogenase-like, Cyp26b1 - cytochrome p450, family 26, subfamily b, polypeptide 1, Dhcr7 - 7-dehydrocholesterol reductase, Tm7sf2 - transmembrane 7 superfamily member 2,…
GO:1902653	secondary alcohol biosynthetic process	1.05e-09	5.06e-06	23.28	12888	27	164	8	[Fdft1 - farnesyl diphosphate farnesyl transferase 1, Mvd - mevalonate (diphospho) decarboxylase, Cyp51 - cytochrome p450, family 51, Insig1 - insulin induced gene 1, Nsdhl - nad(p) dependent steroid dehydrogenase-like, Cyp26b1 - cytochrome p450, family 26, subfamily b, polypeptide 1, Dhcr7 - 7-dehydrocholesterol reductase, Tm7sf2 - transmembrane 7 superfamily member 2]
GO:0016125	sterol metabolic process	1.57e-08	5.69e-05	9.71	12888	89	164	11	[Fdft1 - farnesyl diphosphate farnesyl transferase 1, Mvd - mevalonate (diphospho) decarboxylase, Cyp51 - cytochrome p450, family 51, Insig1 - insulin induced gene 1, Sqle - squalene epoxidase, Nsdhl - nad(p) dependent steroid dehydrogenase-like, Ldlr - low density lipoprotein receptor, Cyp26b1 - cytochrome p450, family 26, subfamily b, polypeptide 1, Dhcr7 - 7-dehydrocholesterol reductase, Tm7sf…
GO:0006695	cholesterol biosynthetic process	1.88e-08	5.46e-05	22	12888	25	164	7	[Fdft1 - farnesyl diphosphate farnesyl transferase 1, Cyp51 - cytochrome p450, family 51, Mvd - mevalonate (diphospho) decarboxylase, Insig1 - insulin induced gene 1, Nsdhl - nad(p) dependent steroid dehydrogenase-like, Dhcr7 - 7-dehydrocholesterol reductase, Tm7sf2 - transmembrane 7 superfamily member 2]
GO:1901617	organic hydroxy compound biosynthetic process	5.11e-08	0.000124	7.67	12888	123	164	12	[Dao - d-amino acid oxidase, Per2 - period circadian clock 2, Fdft1 - farnesyl diphosphate farnesyl transferase 1, Cyp51 - cytochrome p450, family 51, Mvd - mevalonate (diphospho) decarboxylase, Insig1 - insulin induced gene 1, Sqle - squalene epoxidase, Nsdhl - nad(p) dependent steroid dehydrogenase-like, Cyp26b1 - cytochrome p450, family 26, subfamily b, polypeptide 1, Dhcr7 - 7-dehydrocholeste…
GO:1902652	secondary alcohol metabolic process	1.3e-07	0.00027	9.14	12888	86	164	10	[Fdft1 - farnesyl diphosphate farnesyl transferase 1, Mvd - mevalonate (diphospho) decarboxylase, Cyp51 - cytochrome p450, family 51, Insig1 - insulin induced gene 1, Sqle - squalene epoxidase, Nsdhl - nad(p) dependent steroid dehydrogenase-like, Ldlr - low density lipoprotein receptor, Cyp26b1 - cytochrome p450, family 26, subfamily b, polypeptide 1, Dhcr7 - 7-dehydrocholesterol reductase, Tm7sf…
GO:0008202	steroid metabolic process	1.84e-07	0.000333	6.83	12888	138	164	12	[Fdft1 - farnesyl diphosphate farnesyl transferase 1, Cyp51 - cytochrome p450, family 51, Mvd - mevalonate (diphospho) decarboxylase, Insig1 - insulin induced gene 1, Sqle - squalene epoxidase, Nsdhl - nad(p) dependent steroid dehydrogenase-like, Ldlr - low density lipoprotein receptor, Cyp26b1 - cytochrome p450, family 26, subfamily b, polypeptide 1, Dhcr7 - 7-dehydrocholesterol reductase, Tm7sf…
GO:1901615	organic hydroxy compound metabolic process	2.12e-07	0.000342	4.53	12888	295	164	17	[Per2 - period circadian clock 2, Mvd - mevalonate (diphospho) decarboxylase, Cyp51 - cytochrome p450, family 51, Fdft1 - farnesyl diphosphate farnesyl transferase 1, Insig1 - insulin induced gene 1, Ldlr - low density lipoprotein receptor, Cyp26b1 - cytochrome p450, family 26, subfamily b, polypeptide 1, Sc4mol - sterol-c4-methyl oxidase-like, Dao - d-amino acid oxidase, Gcnt4 - glucosaminyl (n-…
GO:0048729	tissue morphogenesis	3.74e-07	0.000541	4.35	12888	307	164	17	[Frzb - frizzled-related protein, Jag1 - jagged 1, Vegfc - vascular endothelial growth factor c, Vegfa - vascular endothelial growth factor a, Vit - vitrin, Nrarp - notch-regulated ankyrin repeat protein, Hes5 - hairy and enhancer of split 5 (drosophila), Zic3 - zinc finger protein of the cerebellum 3, Heyl - hairy/enhancer-of-split related with yrpw motif-like, Cecr2 - cat eye syndrome chromosom…
GO:0032502	developmental process	7.88e-07	0.00104	1.66	12888	3465	164	73	[Sox21 - sry-box containing gene 21, Per2 - period circadian clock 2, Ppara - peroxisome proliferator activated receptor alpha, Crhr1 - corticotropin releasing hormone receptor 1, Jag1 - jagged 1, Insig1 - insulin induced gene 1, Ptgs1 - prostaglandin-endoperoxide synthase 1, Kmt2c - lysine (k)-specific methyltransferase 2c, Lgr6 - leucine-rich repeat-containing g protein-coupled receptor 6, Nat8…
GO:0008203	cholesterol metabolic process	8.37e-07	0.00101	8.73	12888	81	164	9	[Fdft1 - farnesyl diphosphate farnesyl transferase 1, Cyp51 - cytochrome p450, family 51, Mvd - mevalonate (diphospho) decarboxylase, Insig1 - insulin induced gene 1, Sqle - squalene epoxidase, Nsdhl - nad(p) dependent steroid dehydrogenase-like, Ldlr - low density lipoprotein receptor, Dhcr7 - 7-dehydrocholesterol reductase, Tm7sf2 - transmembrane 7 superfamily member 2]
GO:0030154	cell differentiation	4.69e-06	0.00522	2.1	12888	1461	164	39	[Sox21 - sry-box containing gene 21, Ranbp3l - ran binding protein 3-like, Per2 - period circadian clock 2, Cbfa2t3 - core-binding factor, runt domain, alpha subunit 2, translocated to, 3 (human), Ppara - peroxisome proliferator activated receptor alpha, Crhr1 - corticotropin releasing hormone receptor 1, Jag1 - jagged 1, Ptgs1 - prostaglandin-endoperoxide synthase 1, Vegfc - vascular endothelial…
GO:0009653	anatomical structure morphogenesis	5.73e-06	0.00593	2.27	12888	1141	164	33	[Jag1 - jagged 1, Insig1 - insulin induced gene 1, Vegfc - vascular endothelial growth factor c, Vegfa - vascular endothelial growth factor a, Nat8 - n-acetyltransferase 8 (gcn5-related, putative), Cyp26b1 - cytochrome p450, family 26, subfamily b, polypeptide 1, Cml3 - camello-like 3, Apln - apelin, Zic3 - zinc finger protein of the cerebellum 3, Gcnt4 - glucosaminyl (n-acetyl) transferase 4, co…
GO:0032501	multicellular organismal process	7.69e-06	0.00743	1.77	12888	2400	164	54	[Sox21 - sry-box containing gene 21, Per2 - period circadian clock 2, Ppara - peroxisome proliferator activated receptor alpha, Crhr1 - corticotropin releasing hormone receptor 1, Jag1 - jagged 1, Ptgs1 - prostaglandin-endoperoxide synthase 1, Kmt2c - lysine (k)-specific methyltransferase 2c, Cyp26b1 - cytochrome p450, family 26, subfamily b, polypeptide 1, Gdf10 - growth differentiation factor 1…
GO:0016129	phytosteroid biosynthetic process	8.02e-06	0.00726	58.94	12888	4	164	3	[Fdft1 - farnesyl diphosphate farnesyl transferase 1, Cyp26b1 - cytochrome p450, family 26, subfamily b, polypeptide 1, Dhcr7 - 7-dehydrocholesterol reductase]
GO:0016128	phytosteroid metabolic process	8.02e-06	0.00684	58.94	12888	4	164	3	[Fdft1 - farnesyl diphosphate farnesyl transferase 1, Cyp26b1 - cytochrome p450, family 26, subfamily b, polypeptide 1, Dhcr7 - 7-dehydrocholesterol reductase]
GO:0007389	pattern specification process	1.1e-05	0.00888	4	12888	275	164	14	[Mns1 - meiosis-specific nuclear structural protein 1, Nrarp - notch-regulated ankyrin repeat protein, Cyp26b1 - cytochrome p450, family 26, subfamily b, polypeptide 1, Hes5 - hairy and enhancer of split 5 (drosophila), Zic3 - zinc finger protein of the cerebellum 3, Heyl - hairy/enhancer-of-split related with yrpw motif-like, Cc2d2a - coiled-coil and c2 domain containing 2a, Ptch1 - patched homo…
GO:0046165	alcohol biosynthetic process	1.11e-05	0.00848	7.48	12888	84	164	8	[Fdft1 - farnesyl diphosphate farnesyl transferase 1, Mvd - mevalonate (diphospho) decarboxylase, Cyp51 - cytochrome p450, family 51, Insig1 - insulin induced gene 1, Nsdhl - nad(p) dependent steroid dehydrogenase-like, Cyp26b1 - cytochrome p450, family 26, subfamily b, polypeptide 1, Dhcr7 - 7-dehydrocholesterol reductase, Tm7sf2 - transmembrane 7 superfamily member 2]
GO:0060429	epithelium development	1.17e-05	0.0085	5.61	12888	140	164	10	[Phgdh - 3-phosphoglycerate dehydrogenase, Cecr2 - cat eye syndrome chromosome region, candidate 2, Frzb - frizzled-related protein, Jag1 - jagged 1, Msx2 - msh homeobox 2, Ptch1 - patched homolog 1, Pax3 - paired box gene 3, Gli2 - gli-kruppel family member gli2, Hes5 - hairy and enhancer of split 5 (drosophila), Heyl - hairy/enhancer-of-split related with yrpw motif-like]
GO:0048856	anatomical structure development	1.55e-05	0.0107	1.73	12888	2457	164	54	[Sox21 - sry-box containing gene 21, Ppara - peroxisome proliferator activated receptor alpha, Crhr1 - corticotropin releasing hormone receptor 1, Jag1 - jagged 1, Insig1 - insulin induced gene 1, Kmt2c - lysine (k)-specific methyltransferase 2c, Lgr6 - leucine-rich repeat-containing g protein-coupled receptor 6, Gdf10 - growth differentiation factor 10, Hsd11b1 - hydroxysteroid 11-beta dehydroge…
GO:0003151	outflow tract morphogenesis	1.6e-05	0.0105	10.97	12888	43	164	6	[Dhrs3 - dehydrogenase/reductase (sdr family) member 3, Ryr1 - ryanodine receptor 1, skeletal muscle, Msx2 - msh homeobox 2, Vegfa - vascular endothelial growth factor a, Fzd2 - frizzled homolog 2 (drosophila), Heyl - hairy/enhancer-of-split related with yrpw motif-like]
GO:0002009	morphogenesis of an epithelium	1.62e-05	0.0102	4.14	12888	247	164	13	[Frzb - frizzled-related protein, Jag1 - jagged 1, Vegfc - vascular endothelial growth factor c, Vegfa - vascular endothelial growth factor a, Nrarp - notch-regulated ankyrin repeat protein, Hes5 - hairy and enhancer of split 5 (drosophila), Zic3 - zinc finger protein of the cerebellum 3, Cecr2 - cat eye syndrome chromosome region, candidate 2, Ptch1 - patched homolog 1, Msx2 - msh homeobox 2, Tn…
GO:0006066	alcohol metabolic process	1.76e-05	0.0106	4.43	12888	213	164	12	[Mvd - mevalonate (diphospho) decarboxylase, Fdft1 - farnesyl diphosphate farnesyl transferase 1, Dhrs3 - dehydrogenase/reductase (sdr family) member 3, Cyp51 - cytochrome p450, family 51, Insig1 - insulin induced gene 1, Rpe65 - retinal pigment epithelium 65, Sqle - squalene epoxidase, Nsdhl - nad(p) dependent steroid dehydrogenase-like, Ldlr - low density lipoprotein receptor, Cyp26b1 - cytochr…
GO:0048513	animal organ development	2.8e-05	0.0162	2.29	12888	959	164	28	[Sox21 - sry-box containing gene 21, Jag1 - jagged 1, Crhr1 - corticotropin releasing hormone receptor 1, Smyd1 - set and mynd domain containing 1, Vegfa - vascular endothelial growth factor a, Hsd11b1 - hydroxysteroid 11-beta dehydrogenase 1, Zic3 - zinc finger protein of the cerebellum 3, Phgdh - 3-phosphoglycerate dehydrogenase, Ptch1 - patched homolog 1, Gli2 - gli-kruppel family member gli2,…
GO:0030857	negative regulation of epithelial cell differentiation	4.79e-05	0.0267	12.28	12888	32	164	5	[Frzb - frizzled-related protein, Msx2 - msh homeobox 2, Jag1 - jagged 1, Vegfa - vascular endothelial growth factor a, Hes5 - hairy and enhancer of split 5 (drosophila)]
GO:0035239	tube morphogenesis	6.42e-05	0.0344	3.88	12888	243	164	12	[Ephb3 - eph receptor b3, Jag1 - jagged 1, Msx2 - msh homeobox 2, Ptch1 - patched homolog 1, Gli2 - gli-kruppel family member gli2, Vegfa - vascular endothelial growth factor a, Dspp - dentin sialophosphoprotein, Nrarp - notch-regulated ankyrin repeat protein, Ldlr - low density lipoprotein receptor, Fzd4 - frizzled homolog 4 (drosophila), Hes5 - hairy and enhancer of split 5 (drosophila), Zic3 -…
GO:0007166	cell surface receptor signaling pathway	6.55e-05	0.0339	2.11	12888	1116	164	30	[Dusp22 - dual specificity phosphatase 22, Jag1 - jagged 1, Crhr1 - corticotropin releasing hormone receptor 1, Vegfc - vascular endothelial growth factor c, Vegfa - vascular endothelial growth factor a, Lgr6 - leucine-rich repeat-containing g protein-coupled receptor 6, Gdf10 - growth differentiation factor 10, Efna2 - ephrin a2, Ptch1 - patched homolog 1, Gli2 - gli-kruppel family member gli2, …
GO:0008610	lipid biosynthetic process	6.73e-05	0.0337	3.4	12888	324	164	14	[Cyp51 - cytochrome p450, family 51, Fdft1 - farnesyl diphosphate farnesyl transferase 1, Mvd - mevalonate (diphospho) decarboxylase, Ptgs1 - prostaglandin-endoperoxide synthase 1, Insig1 - insulin induced gene 1, Cyp26b1 - cytochrome p450, family 26, subfamily b, polypeptide 1, Sc4mol - sterol-c4-methyl oxidase-like, Hsd11b1 - hydroxysteroid 11-beta dehydrogenase 1, Acss2 - acyl-coa synthetase s…
GO:0048598	embryonic morphogenesis	7.19e-05	0.0348	3.37	12888	326	164	14	[Frzb - frizzled-related protein, Insig1 - insulin induced gene 1, Vegfc - vascular endothelial growth factor c, Nat8 - n-acetyltransferase 8 (gcn5-related, putative), Cyp26b1 - cytochrome p450, family 26, subfamily b, polypeptide 1, Zic3 - zinc finger protein of the cerebellum 3, Apln - apelin, Cml3 - camello-like 3, Cecr2 - cat eye syndrome chromosome region, candidate 2, Ptch1 - patched homolo…
GO:0045598	regulation of fat cell differentiation	9.56e-05	0.0447	5.56	12888	113	164	8	[Trib2 - tribbles homolog 2 (drosophila), Frzb - frizzled-related protein, Wif1 - wnt inhibitory factor 1, Jag1 - jagged 1, Msx2 - msh homeobox 2, Insig1 - insulin induced gene 1, Fndc5 - fibronectin type iii domain containing 5, Vegfa - vascular endothelial growth factor a]
GO:0021915	neural tube development	0.000144	0.0653	9.82	12888	40	164	5	[Phgdh - 3-phosphoglycerate dehydrogenase, Cecr2 - cat eye syndrome chromosome region, candidate 2, Pax3 - paired box gene 3, Gli2 - gli-kruppel family member gli2, Hes5 - hairy and enhancer of split 5 (drosophila)]
GO:0030855	epithelial cell differentiation	0.000145	0.0635	4.18	12888	188	164	10	[Jag1 - jagged 1, Crhr1 - corticotropin releasing hormone receptor 1, Ptch1 - patched homolog 1, Ptgs1 - prostaglandin-endoperoxide synthase 1, Gli2 - gli-kruppel family member gli2, Gli1 - gli-kruppel family member gli1, Vegfa - vascular endothelial growth factor a, Dspp - dentin sialophosphoprotein, Fzd2 - frizzled homolog 2 (drosophila), Foxb1 - forkhead box b1]
GO:1902811	positive regulation of skeletal muscle fiber differentiation	0.000161	0.0686	78.59	12888	2	164	2	[Rbm24 - rna binding motif protein 24, Cyp26b1 - cytochrome p450, family 26, subfamily b, polypeptide 1]
GO:0009994	oocyte differentiation	0.000161	0.0666	78.59	12888	2	164	2	[Lgr5 - leucine rich repeat containing g protein coupled receptor 5, Kmt2b - lysine (k)-specific methyltransferase 2b]
GO:0007418	ventral midline development	0.000161	0.0648	78.59	12888	2	164	2	[Gli2 - gli-kruppel family member gli2, Gli1 - gli-kruppel family member gli1]
GO:0060032	notochord regression	0.000161	0.063	78.59	12888	2	164	2	[Gli2 - gli-kruppel family member gli2, Gli1 - gli-kruppel family member gli1]
GO:0003002	regionalization	0.000179	0.0683	4.07	12888	193	164	10	[Msx2 - msh homeobox 2, Ptch1 - patched homolog 1, Pax3 - paired box gene 3, Gli2 - gli-kruppel family member gli2, Gli1 - gli-kruppel family member gli1, Foxb1 - forkhead box b1, Cyp26b1 - cytochrome p450, family 26, subfamily b, polypeptide 1, Hes5 - hairy and enhancer of split 5 (drosophila), Heyl - hairy/enhancer-of-split related with yrpw motif-like, Zic3 - zinc finger protein of the cerebel…
GO:0007224	smoothened signaling pathway	0.000187	0.0696	7.14	12888	66	164	6	[Cc2d2a - coiled-coil and c2 domain containing 2a, Ptch1 - patched homolog 1, Gli2 - gli-kruppel family member gli2, Nsdhl - nad(p) dependent steroid dehydrogenase-like, Gli1 - gli-kruppel family member gli1, Hes5 - hairy and enhancer of split 5 (drosophila)]
GO:0045599	negative regulation of fat cell differentiation	0.000204	0.0741	9.14	12888	43	164	5	[Trib2 - tribbles homolog 2 (drosophila), Msx2 - msh homeobox 2, Jag1 - jagged 1, Insig1 - insulin induced gene 1, Vegfa - vascular endothelial growth factor a]
GO:0009888	tissue development	0.000216	0.0762	2.78	12888	453	164	16	[Ppara - peroxisome proliferator activated receptor alpha, Frzb - frizzled-related protein, Jag1 - jagged 1, Vegfa - vascular endothelial growth factor a, Lgr6 - leucine-rich repeat-containing g protein-coupled receptor 6, Rbm24 - rna binding motif protein 24, Hes5 - hairy and enhancer of split 5 (drosophila), Heyl - hairy/enhancer-of-split related with yrpw motif-like, Phgdh - 3-phosphoglycerate…
GO:0060349	bone morphogenesis	0.000304	0.105	12.09	12888	26	164	4	[Dhrs3 - dehydrogenase/reductase (sdr family) member 3, Msx2 - msh homeobox 2, Dspp - dentin sialophosphoprotein, Cyp26b1 - cytochrome p450, family 26, subfamily b, polypeptide 1]
GO:0006720	isoprenoid metabolic process	0.000381	0.128	8.02	12888	49	164	5	[Dhrs3 - dehydrogenase/reductase (sdr family) member 3, Fdft1 - farnesyl diphosphate farnesyl transferase 1, Mvd - mevalonate (diphospho) decarboxylase, Rpe65 - retinal pigment epithelium 65, Cyp26b1 - cytochrome p450, family 26, subfamily b, polypeptide 1]
GO:0007162	negative regulation of cell adhesion	0.000395	0.13	3.69	12888	213	164	10	[Ppara - peroxisome proliferator activated receptor alpha, Dusp22 - dual specificity phosphatase 22, Jag1 - jagged 1, Cml5 - camello-like 5, Tnc - tenascin c, Vegfa - vascular endothelial growth factor a, Nrarp - notch-regulated ankyrin repeat protein, Nat8 - n-acetyltransferase 8 (gcn5-related, putative), Fzd4 - frizzled homolog 4 (drosophila), Cml3 - camello-like 3]
GO:0009069	serine family amino acid metabolic process	0.000408	0.131	11.23	12888	28	164	4	[Dao - d-amino acid oxidase, Phgdh - 3-phosphoglycerate dehydrogenase, Cth - cystathionase (cystathionine gamma-lyase), Ahcyl1 - s-adenosylhomocysteine hydrolase-like 1]
GO:0007275	multicellular organism development	0.000411	0.129	2.06	12888	952	164	25	[Ppara - peroxisome proliferator activated receptor alpha, Jag1 - jagged 1, Vegfc - vascular endothelial growth factor c, Vegfa - vascular endothelial growth factor a, Cnot3 - ccr4-not transcription complex, subunit 3, Zic3 - zinc finger protein of the cerebellum 3, Apln - apelin, Ptch1 - patched homolog 1, Cml5 - camello-like 5, Gli2 - gli-kruppel family member gli2, Prdm15 - pr domain containin…
GO:0045667	regulation of osteoblast differentiation	0.000452	0.139	5.09	12888	108	164	7	[Ranbp3l - ran binding protein 3-like, Jag1 - jagged 1, Msx2 - msh homeobox 2, Ptch1 - patched homolog 1, Gli1 - gli-kruppel family member gli1, Vegfa - vascular endothelial growth factor a, Gdf10 - growth differentiation factor 10]
GO:0071421	manganese ion transmembrane transport	0.000479	0.145	52.39	12888	3	164	2	[Slc30a10 - solute carrier family 30, member 10, Hrh1 - histamine receptor h1]
GO:1902809	regulation of skeletal muscle fiber differentiation	0.000479	0.142	52.39	12888	3	164	2	[Rbm24 - rna binding motif protein 24, Cyp26b1 - cytochrome p450, family 26, subfamily b, polypeptide 1]
GO:0006696	ergosterol biosynthetic process	0.000479	0.139	52.39	12888	3	164	2	[Fdft1 - farnesyl diphosphate farnesyl transferase 1, Cyp26b1 - cytochrome p450, family 26, subfamily b, polypeptide 1]
GO:0008204	ergosterol metabolic process	0.000479	0.136	52.39	12888	3	164	2	[Fdft1 - farnesyl diphosphate farnesyl transferase 1, Cyp26b1 - cytochrome p450, family 26, subfamily b, polypeptide 1]
GO:1901492	positive regulation of lymphangiogenesis	0.000479	0.133	52.39	12888	3	164	2	[Vegfc - vascular endothelial growth factor c, Vegfa - vascular endothelial growth factor a]
GO:0048869	cellular developmental process	0.000498	0.136	1.64	12888	2058	164	43	[Sox21 - sry-box containing gene 21, Ranbp3l - ran binding protein 3-like, Per2 - period circadian clock 2, Cbfa2t3 - core-binding factor, runt domain, alpha subunit 2, translocated to, 3 (human), Ppara - peroxisome proliferator activated receptor alpha, Jag1 - jagged 1, Crhr1 - corticotropin releasing hormone receptor 1, Ptgs1 - prostaglandin-endoperoxide synthase 1, Vegfc - vascular endothelial…
GO:0098810	neurotransmitter reuptake	0.000527	0.141	18.14	12888	13	164	3	[Slc6a11 - solute carrier family 6 (neurotransmitter transporter, gaba), member 11, Slc6a2 - solute carrier family 6 (neurotransmitter transporter, noradrenalin), member 2, Slc6a1 - solute carrier family 6 (neurotransmitter transporter, gaba), member 1]
GO:0006721	terpenoid metabolic process	0.000608	0.16	10.14	12888	31	164	4	[Dhrs3 - dehydrogenase/reductase (sdr family) member 3, Fdft1 - farnesyl diphosphate farnesyl transferase 1, Rpe65 - retinal pigment epithelium 65, Cyp26b1 - cytochrome p450, family 26, subfamily b, polypeptide 1]
GO:0001666	response to hypoxia	0.000632	0.164	4.22	12888	149	164	8	[Plekhn1 - pleckstrin homology domain containing, family n member 1, Cbfa2t3 - core-binding factor, runt domain, alpha subunit 2, translocated to, 3 (human), Ppara - peroxisome proliferator activated receptor alpha, Ryr1 - ryanodine receptor 1, skeletal muscle, Crhr1 - corticotropin releasing hormone receptor 1, Vegfc - vascular endothelial growth factor c, Vegfa - vascular endothelial growth fac…
GO:0030324	lung development	0.000652	0.166	5.68	12888	83	164	6	[Gli2 - gli-kruppel family member gli2, Gli1 - gli-kruppel family member gli1, Vegfa - vascular endothelial growth factor a, Dhcr7 - 7-dehydrocholesterol reductase, Hsd11b1 - hydroxysteroid 11-beta dehydrogenase 1, Zic3 - zinc finger protein of the cerebellum 3]
GO:0044281	small molecule metabolic process	0.000738	0.184	1.92	12888	1106	164	27	[Per2 - period circadian clock 2, Mvd - mevalonate (diphospho) decarboxylase, Ppara - peroxisome proliferator activated receptor alpha, Cyp51 - cytochrome p450, family 51, Insig1 - insulin induced gene 1, Ptgs1 - prostaglandin-endoperoxide synthase 1, Cyp26b1 - cytochrome p450, family 26, subfamily b, polypeptide 1, Pank1 - pantothenate kinase 1, Tdo2 - tryptophan 2,3-dioxygenase, Dao - d-amino a…
GO:0036293	response to decreased oxygen levels	0.000785	0.193	4.08	12888	154	164	8	[Plekhn1 - pleckstrin homology domain containing, family n member 1, Cbfa2t3 - core-binding factor, runt domain, alpha subunit 2, translocated to, 3 (human), Ppara - peroxisome proliferator activated receptor alpha, Ryr1 - ryanodine receptor 1, skeletal muscle, Crhr1 - corticotropin releasing hormone receptor 1, Vegfc - vascular endothelial growth factor c, Vegfa - vascular endothelial growth fac…
GO:0044283	small molecule biosynthetic process	0.000852	0.206	2.78	12888	368	164	13	[Per2 - period circadian clock 2, Cyp51 - cytochrome p450, family 51, Fdft1 - farnesyl diphosphate farnesyl transferase 1, Mvd - mevalonate (diphospho) decarboxylase, Ptgs1 - prostaglandin-endoperoxide synthase 1, Insig1 - insulin induced gene 1, Cyp26b1 - cytochrome p450, family 26, subfamily b, polypeptide 1, Acss2 - acyl-coa synthetase short-chain family member 2, Phgdh - 3-phosphoglycerate de…
GO:0007223	Wnt signaling pathway, calcium modulating pathway	0.00095	0.226	39.29	12888	4	164	2	[Fzd2 - frizzled homolog 2 (drosophila), Fzd4 - frizzled homolog 4 (drosophila)]
GO:0021938	smoothened signaling pathway involved in regulation of cerebellar granule cell precursor cell proliferation	0.00095	0.222	39.29	12888	4	164	2	[Gli2 - gli-kruppel family member gli2, Gli1 - gli-kruppel family member gli1]
GO:0042445	hormone metabolic process	0.000999	0.23	5.24	12888	90	164	6	[Dhrs3 - dehydrogenase/reductase (sdr family) member 3, Gcnt4 - glucosaminyl (n-acetyl) transferase 4, core 2 (beta-1,6-n-acetylglucosaminyltransferase), Rpe65 - retinal pigment epithelium 65, Cyp26b1 - cytochrome p450, family 26, subfamily b, polypeptide 1, Dhcr7 - 7-dehydrocholesterol reductase, Hsd11b1 - hydroxysteroid 11-beta dehydrogenase 1]

## Sheet: GFAP_up_GOprocess
GO Term	Description	P-value	FDR q-value	Enrichment	N	B	n	b	Genes
GO:0006952	defense response	2e-18	2.9e-14	2.94	12888	547	634	79	[Gbp7 - guanylate binding protein 7, Jak3 - janus kinase 3, Ptgfr - prostaglandin f receptor, Sphk1 - sphingosine kinase 1, Fn1 - fibronectin 1, Tlr4 - toll-like receptor 4, Oas1a - 2'-5' oligoadenylate synthetase 1a, Unc93b1 - unc-93 homolog b1 (c. elegans), Ddx58 - dead (asp-glu-ala-asp) box polypeptide 58, Cxcl9 - chemokine (c-x-c motif) ligand 9, Cd37 - cd37 antigen, Cd74 - cd74 antigen (inva…
GO:0022610	biological adhesion	1.41e-13	1.02e-09	2.55	12888	575	634	72	[Cldn11 - claudin 11, Gbp7 - guanylate binding protein 7, Igsf9b - immunoglobulin superfamily, member 9b, Fn1 - fibronectin 1, Wisp2 - wnt1 inducible signaling pathway protein 2, Trip6 - thyroid hormone receptor interactor 6, Nt5e - 5' nucleotidase, ecto, Itga1 - integrin alpha 1, Cdh24 - cadherin-like 24, Gbp9 - guanylate-binding protein 9, Cdsn - corneodesmosin, Col5a3 - collagen, type v, alpha…
GO:0002376	immune system process	1.97e-13	9.52e-10	2.23	12888	830	634	91	[Nfatc2 - nuclear factor of activated t cells, cytoplasmic, calcineurin dependent 2, Apbb1ip - amyloid beta (a4) precursor protein-binding, family b, member 1 interacting protein, Jak3 - janus kinase 3, Fas - fas (tnf receptor superfamily member 6), Dysf - dysferlin, Emr1 - egf-like module containing, mucin-like, hormone receptor-like sequence 1, Tlr4 - toll-like receptor 4, Ctps - cytidine 5'-tr…
GO:0048584	positive regulation of response to stimulus	9.67e-13	3.5e-09	1.82	12888	1505	634	135	[Fas - fas (tnf receptor superfamily member 6), Ptgis - prostaglandin i2 (prostacyclin) synthase, Mal - myelin and lymphocyte protein, t cell differentiation protein, Gsn - gelsolin, Il19 - interleukin 19, Unc93b1 - unc-93 homolog b1 (c. elegans), Ddx58 - dead (asp-glu-ala-asp) box polypeptide 58, Ascl1 - achaete-scute complex homolog 1 (drosophila), Hspb1 - heat shock protein 1, Stx3 - syntaxin …
GO:0030198	extracellular matrix organization	1.13e-12	3.29e-09	4.02	12888	177	634	35	[Serpinf2 - serine (or cysteine) peptidase inhibitor, clade f, member 2, Fbln5 - fibulin 5, Col13a1 - collagen, type xiii, alpha 1, Fn1 - fibronectin 1, Loxl2 - lysyl oxidase-like 2, Col18a1 - collagen, type xviii, alpha 1, Tgfbi - transforming growth factor, beta induced, Ddr2 - discoidin domain receptor family, member 2, Itga8 - integrin alpha 8, Tgfb1 - transforming growth factor, beta 1, Col5…
GO:0007155	cell adhesion	6.42e-12	1.55e-08	2.43	12888	569	634	68	[Cldn11 - claudin 11, Igsf9b - immunoglobulin superfamily, member 9b, Fn1 - fibronectin 1, Wisp2 - wnt1 inducible signaling pathway protein 2, Trip6 - thyroid hormone receptor interactor 6, Nt5e - 5' nucleotidase, ecto, Itga1 - integrin alpha 1, Cdh24 - cadherin-like 24, Cdsn - corneodesmosin, Col5a3 - collagen, type v, alpha 3, Mag - myelin-associated glycoprotein, Nedd9 - neural precursor cell …
GO:0043062	extracellular structure organization	9.77e-12	2.02e-08	3.66	12888	200	634	36	[Serpinf2 - serine (or cysteine) peptidase inhibitor, clade f, member 2, Fbln5 - fibulin 5, Fn1 - fibronectin 1, Col13a1 - collagen, type xiii, alpha 1, Loxl2 - lysyl oxidase-like 2, Col18a1 - collagen, type xviii, alpha 1, Tgfbi - transforming growth factor, beta induced, Ddr2 - discoidin domain receptor family, member 2, Itga8 - integrin alpha 8, Tgfb1 - transforming growth factor, beta 1, Col5…
GO:0043207	response to external biotic stimulus	1.55e-11	2.81e-08	2.58	12888	465	634	59	[Gbp7 - guanylate binding protein 7, Ptgfr - prostaglandin f receptor, Tlr4 - toll-like receptor 4, Oas1a - 2'-5' oligoadenylate synthetase 1a, Unc93b1 - unc-93 homolog b1 (c. elegans), Ddx58 - dead (asp-glu-ala-asp) box polypeptide 58, Cxcl9 - chemokine (c-x-c motif) ligand 9, Cd37 - cd37 antigen, Cd86 - cd86 antigen, Gbp9 - guanylate-binding protein 9, Adamts5 - a disintegrin-like and metallope…
GO:0010942	positive regulation of cell death	2.51e-11	4.04e-08	2.4	12888	560	634	66	[Jak3 - janus kinase 3, Fas - fas (tnf receptor superfamily member 6), Fos - fbj osteosarcoma oncogene, Ptgis - prostaglandin i2 (prostacyclin) synthase, Mal - myelin and lymphocyte protein, t cell differentiation protein, Gsn - gelsolin, Il19 - interleukin 19, Lpar1 - lysophosphatidic acid receptor 1, Tlr4 - toll-like receptor 4, Fosl1 - fos-like antigen 1, Ascl1 - achaete-scute complex homolog …
GO:0051707	response to other organism	5.52e-11	8e-08	2.83	12888	345	634	48	[Gbp7 - guanylate binding protein 7, Anxa3 - annexin a3, Slfn8 - schlafen 8, Gbp3 - guanylate binding protein 3, Tlr4 - toll-like receptor 4, Oas1a - 2'-5' oligoadenylate synthetase 1a, Unc93b1 - unc-93 homolog b1 (c. elegans), Cxcl9 - chemokine (c-x-c motif) ligand 9, Ddx58 - dead (asp-glu-ala-asp) box polypeptide 58, Tgfb1 - transforming growth factor, beta 1, Glycam1 - glycosylation dependent …
GO:0009607	response to biotic stimulus	8.71e-11	1.15e-07	2.47	12888	485	634	59	[Gbp7 - guanylate binding protein 7, Ptgfr - prostaglandin f receptor, Tlr4 - toll-like receptor 4, Oas1a - 2'-5' oligoadenylate synthetase 1a, Unc93b1 - unc-93 homolog b1 (c. elegans), Ddx58 - dead (asp-glu-ala-asp) box polypeptide 58, Cxcl9 - chemokine (c-x-c motif) ligand 9, Cd37 - cd37 antigen, Cd86 - cd86 antigen, Gbp9 - guanylate-binding protein 9, Adamts5 - a disintegrin-like and metallope…
GO:0009605	response to external stimulus	1.31e-10	1.58e-07	2.04	12888	845	634	85	[Gbp7 - guanylate binding protein 7, Gucy2f - guanylate cyclase 2f, Fas - fas (tnf receptor superfamily member 6), Ptgfr - prostaglandin f receptor, Fos - fbj osteosarcoma oncogene, Tlr4 - toll-like receptor 4, Oas1a - 2'-5' oligoadenylate synthetase 1a, Fosl1 - fos-like antigen 1, Unc93b1 - unc-93 homolog b1 (c. elegans), Cxcl9 - chemokine (c-x-c motif) ligand 9, Ddx58 - dead (asp-glu-ala-asp) b…
GO:0043065	positive regulation of apoptotic process	1.69e-10	1.88e-07	2.41	12888	506	634	60	[Jak3 - janus kinase 3, Fas - fas (tnf receptor superfamily member 6), Ptgis - prostaglandin i2 (prostacyclin) synthase, Mal - myelin and lymphocyte protein, t cell differentiation protein, Gsn - gelsolin, Il19 - interleukin 19, Lpar1 - lysophosphatidic acid receptor 1, Tlr4 - toll-like receptor 4, Fosl1 - fos-like antigen 1, Ascl1 - achaete-scute complex homolog 1 (drosophila), Itga1 - integrin …
GO:0043068	positive regulation of programmed cell death	2.32e-10	2.4e-07	2.39	12888	510	634	60	[Jak3 - janus kinase 3, Fas - fas (tnf receptor superfamily member 6), Ptgis - prostaglandin i2 (prostacyclin) synthase, Mal - myelin and lymphocyte protein, t cell differentiation protein, Gsn - gelsolin, Il19 - interleukin 19, Lpar1 - lysophosphatidic acid receptor 1, Tlr4 - toll-like receptor 4, Fosl1 - fos-like antigen 1, Ascl1 - achaete-scute complex homolog 1 (drosophila), Itga1 - integrin …
GO:0050896	response to stimulus	2.34e-10	2.26e-07	1.44	12888	3173	634	225	[Fas - fas (tnf receptor superfamily member 6), Ptgfr - prostaglandin f receptor, Ptgis - prostaglandin i2 (prostacyclin) synthase, Gsn - gelsolin, Oas1a - 2'-5' oligoadenylate synthetase 1a, Unc93b1 - unc-93 homolog b1 (c. elegans), Ascl1 - achaete-scute complex homolog 1 (drosophila), Pde3a - phosphodiesterase 3a, cgmp inhibited, Adamts5 - a disintegrin-like and metallopeptidase (reprolysin typ…
GO:0006954	inflammatory response	2.82e-10	2.55e-07	3.4	12888	203	634	34	[Serpinf2 - serine (or cysteine) peptidase inhibitor, clade f, member 2, Sphk1 - sphingosine kinase 1, Ptgfr - prostaglandin f receptor, Fn1 - fibronectin 1, Tlr4 - toll-like receptor 4, Cxcl9 - chemokine (c-x-c motif) ligand 9, Plp1 - proteolipid protein (myelin) 1, Tgfb1 - transforming growth factor, beta 1, Csf1r - colony stimulating factor 1 receptor, Cxcl5 - chemokine (c-x-c motif) ligand 5,…
GO:0042127	regulation of cell proliferation	2.83e-10	2.41e-07	1.85	12888	1156	634	105	[Ptgfr - prostaglandin f receptor, Fas - fas (tnf receptor superfamily member 6), Ddr2 - discoidin domain receptor family, member 2, Pth1r - parathyroid hormone 1 receptor, Ascl1 - achaete-scute complex homolog 1 (drosophila), Stx3 - syntaxin 3, Sh3bp4 - sh3-domain binding protein 4, Lims2 - lim and senescent cell antigen like domains 2, Nox4 - nadph oxidase 4, Ezh2 - enhancer of zeste homolog 2 …
GO:0006955	immune response	3.07e-10	2.48e-07	2.6	12888	399	634	51	[Jak3 - janus kinase 3, Fas - fas (tnf receptor superfamily member 6), Emr1 - egf-like module containing, mucin-like, hormone receptor-like sequence 1, Tlr4 - toll-like receptor 4, Unc93b1 - unc-93 homolog b1 (c. elegans), Cxcl9 - chemokine (c-x-c motif) ligand 9, Ddx58 - dead (asp-glu-ala-asp) box polypeptide 58, Endou - endonuclease, polyu-specific, Cd74 - cd74 antigen (invariant polypeptide of…
GO:0002252	immune effector process	3.14e-10	2.39e-07	3.02	12888	269	634	40	[Apbb1ip - amyloid beta (a4) precursor protein-binding, family b, member 1 interacting protein, Anxa3 - annexin a3, Fas - fas (tnf receptor superfamily member 6), Slfn8 - schlafen 8, Dysf - dysferlin, Ctsc - cathepsin c, Tlr4 - toll-like receptor 4, Oas1a - 2'-5' oligoadenylate synthetase 1a, Unc93b1 - unc-93 homolog b1 (c. elegans), Cxcl9 - chemokine (c-x-c motif) ligand 9, Ddx58 - dead (asp-glu…
GO:0032101	regulation of response to external stimulus	3.15e-10	2.28e-07	2.35	12888	527	634	61	[Cd59a - cd59a antigen, Sphk1 - sphingosine kinase 1, Dysf - dysferlin, Fn1 - fibronectin 1, Ptgis - prostaglandin i2 (prostacyclin) synthase, Lpar1 - lysophosphatidic acid receptor 1, Tlr4 - toll-like receptor 4, Nt5e - 5' nucleotidase, ecto, Ddx58 - dead (asp-glu-ala-asp) box polypeptide 58, Cd37 - cd37 antigen, Cd74 - cd74 antigen (invariant polypeptide of major histocompatibility complex, cla…
GO:0007165	signal transduction	7.66e-10	5.29e-07	1.51	12888	2447	634	182	[Apbb1ip - amyloid beta (a4) precursor protein-binding, family b, member 1 interacting protein, Ptgfr - prostaglandin f receptor, Fas - fas (tnf receptor superfamily member 6), Chrnb4 - cholinergic receptor, nicotinic, beta polypeptide 4, Ptgis - prostaglandin i2 (prostacyclin) synthase, Gsn - gelsolin, Ddr2 - discoidin domain receptor family, member 2, Pth1r - parathyroid hormone 1 receptor, Unc…
GO:0007166	cell surface receptor signaling pathway	8.1e-10	5.34e-07	1.84	12888	1116	634	101	[Fas - fas (tnf receptor superfamily member 6), Ddr2 - discoidin domain receptor family, member 2, Pth1r - parathyroid hormone 1 receptor, Ascl1 - achaete-scute complex homolog 1 (drosophila), Hspb1 - heat shock protein 1, Fcer1g - fc receptor, ige, high affinity i, gamma polypeptide, Npr1 - natriuretic peptide receptor 1, Ano6 - anoctamin 6, Susd5 - sushi domain containing 5, Pdgfra - platelet d…
GO:0040017	positive regulation of locomotion	1.12e-09	7.08e-07	2.4	12888	465	634	55	[Sphk1 - sphingosine kinase 1, Dysf - dysferlin, Fn1 - fibronectin 1, Lpar1 - lysophosphatidic acid receptor 1, Ddr2 - discoidin domain receptor family, member 2, Trip6 - thyroid hormone receptor interactor 6, Tmsb4x - thymosin, beta 4, x chromosome, Syne2 - spectrin repeat containing, nuclear envelope 2, Cd74 - cd74 antigen (invariant polypeptide of major histocompatibility complex, class ii ant…
GO:0052547	regulation of peptidase activity	1.62e-09	9.8e-07	2.96	12888	261	634	38	[Serpinf2 - serine (or cysteine) peptidase inhibitor, clade f, member 2, Fas - fas (tnf receptor superfamily member 6), Rffl - ring finger and fyve like domain containing protein, Gsn - gelsolin, Dap - death-associated protein, Pawr - prkc, apoptosis, wt1, regulator, Efna1 - ephrin a1, Ret - ret proto-oncogene, Serpind1 - serine (or cysteine) peptidase inhibitor, clade d, member 1, St18 - suppres…
GO:0050727	regulation of inflammatory response	2.21e-09	1.28e-06	3.16	12888	219	634	34	[Gpr17 - g protein-coupled receptor 17, Cd59a - cd59a antigen, Sphk1 - sphingosine kinase 1, Ptgis - prostaglandin i2 (prostacyclin) synthase, Cebpa - ccaat/enhancer binding protein (c/ebp), alpha, Ctsc - cathepsin c, Tlr4 - toll-like receptor 4, Nt5e - 5' nucleotidase, ecto, Cd276 - cd276 antigen, Socs3 - suppressor of cytokine signaling 3, Serpinf1 - serine (or cysteine) peptidase inhibitor, cl…
GO:2000147	positive regulation of cell motility	3.11e-09	1.74e-06	2.41	12888	439	634	52	[Sphk1 - sphingosine kinase 1, Dysf - dysferlin, Fn1 - fibronectin 1, Ddr2 - discoidin domain receptor family, member 2, Lpar1 - lysophosphatidic acid receptor 1, Trip6 - thyroid hormone receptor interactor 6, Tmsb4x - thymosin, beta 4, x chromosome, Syne2 - spectrin repeat containing, nuclear envelope 2, Cd74 - cd74 antigen (invariant polypeptide of major histocompatibility complex, class ii ant…
GO:0051272	positive regulation of cellular component movement	3.65e-09	1.96e-06	2.37	12888	454	634	53	[Sphk1 - sphingosine kinase 1, Dysf - dysferlin, Fn1 - fibronectin 1, Lpar1 - lysophosphatidic acid receptor 1, Ddr2 - discoidin domain receptor family, member 2, Trip6 - thyroid hormone receptor interactor 6, Tmsb4x - thymosin, beta 4, x chromosome, Syne2 - spectrin repeat containing, nuclear envelope 2, Cd74 - cd74 antigen (invariant polypeptide of major histocompatibility complex, class ii ant…
GO:0031347	regulation of defense response	4.14e-09	2.14e-06	2.47	12888	404	634	49	[Cd59a - cd59a antigen, Sphk1 - sphingosine kinase 1, Ptgis - prostaglandin i2 (prostacyclin) synthase, Tlr4 - toll-like receptor 4, Unc93b1 - unc-93 homolog b1 (c. elegans), Ddx58 - dead (asp-glu-ala-asp) box polypeptide 58, Nt5e - 5' nucleotidase, ecto, Cd37 - cd37 antigen, Cd74 - cd74 antigen (invariant polypeptide of major histocompatibility complex, class ii antigen-associated), Cd86 - cd86 …
GO:0009967	positive regulation of signal transduction	5.33e-09	2.66e-06	1.78	12888	1140	634	100	[Fas - fas (tnf receptor superfamily member 6), Ptgis - prostaglandin i2 (prostacyclin) synthase, Mal - myelin and lymphocyte protein, t cell differentiation protein, Gsn - gelsolin, Il19 - interleukin 19, Ascl1 - achaete-scute complex homolog 1 (drosophila), Lims2 - lim and senescent cell antigen like domains 2, Nox4 - nadph oxidase 4, Ezh2 - enhancer of zeste homolog 2 (drosophila), Npr1 - natr…
GO:0048583	regulation of response to stimulus	5.92e-09	2.86e-06	1.45	12888	2740	634	195	[Fas - fas (tnf receptor superfamily member 6), Ptgis - prostaglandin i2 (prostacyclin) synthase, Mal - myelin and lymphocyte protein, t cell differentiation protein, Gsn - gelsolin, Il19 - interleukin 19, Unc93b1 - unc-93 homolog b1 (c. elegans), Ascl1 - achaete-scute complex homolog 1 (drosophila), Pde3a - phosphodiesterase 3a, cgmp inhibited, Stx3 - syntaxin 3, Fcer1g - fc receptor, ige, high …
GO:0002684	positive regulation of immune system process	6.58e-09	3.07e-06	2.25	12888	515	634	57	[Jak3 - janus kinase 3, Nfatc2 - nuclear factor of activated t cells, cytoplasmic, calcineurin dependent 2, Dysf - dysferlin, Fos - fbj osteosarcoma oncogene, Tlr4 - toll-like receptor 4, Unc93b1 - unc-93 homolog b1 (c. elegans), Ddx58 - dead (asp-glu-ala-asp) box polypeptide 58, Cd37 - cd37 antigen, Cd74 - cd74 antigen (invariant polypeptide of major histocompatibility complex, class ii antigen-…
GO:0010941	regulation of cell death	7.15e-09	3.24e-06	1.72	12888	1288	634	109	[Ptgfr - prostaglandin f receptor, Fas - fas (tnf receptor superfamily member 6), Ptgis - prostaglandin i2 (prostacyclin) synthase, Mal - myelin and lymphocyte protein, t cell differentiation protein, Gsn - gelsolin, Il19 - interleukin 19, Ascl1 - achaete-scute complex homolog 1 (drosophila), Hspb1 - heat shock protein 1, Pde3a - phosphodiesterase 3a, cgmp inhibited, Socs3 - suppressor of cytokin…
GO:0001817	regulation of cytokine production	7.37e-09	3.24e-06	2.37	12888	437	634	51	[Cd59a - cd59a antigen, Jak3 - janus kinase 3, Sphk1 - sphingosine kinase 1, Fn1 - fibronectin 1, Tlr4 - toll-like receptor 4, Frmd8 - ferm domain containing 8, Unc93b1 - unc-93 homolog b1 (c. elegans), Ddx58 - dead (asp-glu-ala-asp) box polypeptide 58, Cd74 - cd74 antigen (invariant polypeptide of major histocompatibility complex, class ii antigen-associated), Hspb1 - heat shock protein 1, Fcer1…
GO:0030335	positive regulation of cell migration	9.32e-09	3.97e-06	2.38	12888	427	634	50	[Sphk1 - sphingosine kinase 1, Dysf - dysferlin, Fn1 - fibronectin 1, Ddr2 - discoidin domain receptor family, member 2, Lpar1 - lysophosphatidic acid receptor 1, Trip6 - thyroid hormone receptor interactor 6, Tmsb4x - thymosin, beta 4, x chromosome, Syne2 - spectrin repeat containing, nuclear envelope 2, Cd74 - cd74 antigen (invariant polypeptide of major histocompatibility complex, class ii ant…
GO:0051240	positive regulation of multicellular organismal process	9.95e-09	4.12e-06	1.67	12888	1408	634	116	[Chrnb4 - cholinergic receptor, nicotinic, beta polypeptide 4, Ptgis - prostaglandin i2 (prostacyclin) synthase, Ddr2 - discoidin domain receptor family, member 2, Frmd8 - ferm domain containing 8, Unc93b1 - unc-93 homolog b1 (c. elegans), Ddx58 - dead (asp-glu-ala-asp) box polypeptide 58, Ascl1 - achaete-scute complex homolog 1 (drosophila), Hspb1 - heat shock protein 1, Pde3a - phosphodiesteras…
GO:0098542	defense response to other organism	1.16e-08	4.68e-06	3.02	12888	222	634	33	[Gbp7 - guanylate binding protein 7, Anxa3 - annexin a3, Slfn8 - schlafen 8, Tlr4 - toll-like receptor 4, Gbp3 - guanylate binding protein 3, Oas1a - 2'-5' oligoadenylate synthetase 1a, Unc93b1 - unc-93 homolog b1 (c. elegans), Cxcl9 - chemokine (c-x-c motif) ligand 9, Ddx58 - dead (asp-glu-ala-asp) box polypeptide 58, Tgfb1 - transforming growth factor, beta 1, Cd37 - cd37 antigen, Cd86 - cd86 a…
GO:1902533	positive regulation of intracellular signal transduction	1.59e-08	6.21e-06	1.99	12888	725	634	71	[Sphk1 - sphingosine kinase 1, Il19 - interleukin 19, Iqgap3 - iq motif containing gtpase activating protein 3, Lpar1 - lysophosphatidic acid receptor 1, Tlr4 - toll-like receptor 4, Trip6 - thyroid hormone receptor interactor 6, Itga1 - integrin alpha 1, Cd74 - cd74 antigen (invariant polypeptide of major histocompatibility complex, class ii antigen-associated), Lif - leukemia inhibitory factor,…
GO:0050865	regulation of cell activation	2.03e-08	7.73e-06	2.52	12888	347	634	43	[Jak3 - janus kinase 3, Nfatc2 - nuclear factor of activated t cells, cytoplasmic, calcineurin dependent 2, Sphk1 - sphingosine kinase 1, Fas - fas (tnf receptor superfamily member 6), Cebpa - ccaat/enhancer binding protein (c/ebp), alpha, Ctsc - cathepsin c, Gsn - gelsolin, Tlr4 - toll-like receptor 4, Pawr - prkc, apoptosis, wt1, regulator, Tgfb1 - transforming growth factor, beta 1, Parp3 - po…
GO:0048518	positive regulation of biological process	2.16e-08	8.03e-06	1.31	12888	4345	634	279	[Apbb1ip - amyloid beta (a4) precursor protein-binding, family b, member 1 interacting protein, Fas - fas (tnf receptor superfamily member 6), Ptgfr - prostaglandin f receptor, Ptgis - prostaglandin i2 (prostacyclin) synthase, Mal - myelin and lymphocyte protein, t cell differentiation protein, Gsn - gelsolin, Il19 - interleukin 19, Ddr2 - discoidin domain receptor family, member 2, Frmd8 - ferm …
GO:0043067	regulation of programmed cell death	2.42e-08	8.75e-06	1.74	12888	1158	634	99	[Ptgfr - prostaglandin f receptor, Fas - fas (tnf receptor superfamily member 6), Ptgis - prostaglandin i2 (prostacyclin) synthase, Mal - myelin and lymphocyte protein, t cell differentiation protein, Gsn - gelsolin, Il19 - interleukin 19, Ascl1 - achaete-scute complex homolog 1 (drosophila), Hspb1 - heat shock protein 1, Pde3a - phosphodiesterase 3a, cgmp inhibited, Socs3 - suppressor of cytokin…
GO:0042221	response to chemical	2.63e-08	9.31e-06	1.56	12888	1797	634	138	[Gbp7 - guanylate binding protein 7, Ptgfr - prostaglandin f receptor, Fas - fas (tnf receptor superfamily member 6), Chrnb4 - cholinergic receptor, nicotinic, beta polypeptide 4, Ptgis - prostaglandin i2 (prostacyclin) synthase, Gsn - gelsolin, Ddx58 - dead (asp-glu-ala-asp) box polypeptide 58, Hspb1 - heat shock protein 1, Pde3a - phosphodiesterase 3a, cgmp inhibited, Socs3 - suppressor of cyto…
GO:0009617	response to bacterium	3.01e-08	1.04e-05	3.25	12888	175	634	28	[Gbp7 - guanylate binding protein 7, Anxa3 - annexin a3, Tlr4 - toll-like receptor 4, Gbp3 - guanylate binding protein 3, Cxcl9 - chemokine (c-x-c motif) ligand 9, Glycam1 - glycosylation dependent cell adhesion molecule 1, Lalba - lactalbumin, alpha, Adamts5 - a disintegrin-like and metallopeptidase (reprolysin type) with thrombospondin type 1 motif, 5 (aggrecanase-2), Gbp9 - guanylate-binding p…
GO:0030162	regulation of proteolysis	3.25e-08	1.1e-05	2.19	12888	511	634	55	[Cd59a - cd59a antigen, Fas - fas (tnf receptor superfamily member 6), Gsn - gelsolin, St18 - suppression of tumorigenicity 18, Serpina3m - serine (or cysteine) peptidase inhibitor, clade a, member 3m, Timp1 - tissue inhibitor of metalloproteinase 1, Pbk - pdz binding kinase, Mbp - myelin basic protein, Mfi2 - antigen p97 (melanoma associated) identified by monoclonal antibodies 133.2 and 96.5, T…
GO:0002694	regulation of leukocyte activation	3.87e-08	1.27e-05	2.57	12888	317	634	40	[Jak3 - janus kinase 3, Nfatc2 - nuclear factor of activated t cells, cytoplasmic, calcineurin dependent 2, Sphk1 - sphingosine kinase 1, Fas - fas (tnf receptor superfamily member 6), Cebpa - ccaat/enhancer binding protein (c/ebp), alpha, Ctsc - cathepsin c, Gsn - gelsolin, Tlr4 - toll-like receptor 4, Pawr - prkc, apoptosis, wt1, regulator, Tgfb1 - transforming growth factor, beta 1, Parp3 - po…
GO:0042981	regulation of apoptotic process	4.34e-08	1.4e-05	1.73	12888	1140	634	97	[Ptgfr - prostaglandin f receptor, Fas - fas (tnf receptor superfamily member 6), Ptgis - prostaglandin i2 (prostacyclin) synthase, Mal - myelin and lymphocyte protein, t cell differentiation protein, Gsn - gelsolin, Il19 - interleukin 19, Ascl1 - achaete-scute complex homolog 1 (drosophila), Hspb1 - heat shock protein 1, Pde3a - phosphodiesterase 3a, cgmp inhibited, Socs3 - suppressor of cytokin…
GO:0008284	positive regulation of cell proliferation	4.35e-08	1.37e-05	2.01	12888	656	634	65	[Jak3 - janus kinase 3, Nfatc2 - nuclear factor of activated t cells, cytoplasmic, calcineurin dependent 2, Sphk1 - sphingosine kinase 1, Ptgfr - prostaglandin f receptor, Fn1 - fibronectin 1, Dysf - dysferlin, Iqgap3 - iq motif containing gtpase activating protein 3, Ddr2 - discoidin domain receptor family, member 2, Tlr4 - toll-like receptor 4, Pth1r - parathyroid hormone 1 receptor, Ascl1 - ac…
GO:0040011	locomotion	4.51e-08	1.39e-05	1.97	12888	700	634	68	[Nfatc2 - nuclear factor of activated t cells, cytoplasmic, calcineurin dependent 2, Fn1 - fibronectin 1, Loxl2 - lysyl oxidase-like 2, Lpar1 - lysophosphatidic acid receptor 1, Cxcl9 - chemokine (c-x-c motif) ligand 9, Ascl1 - achaete-scute complex homolog 1 (drosophila), Itga1 - integrin alpha 1, Syne2 - spectrin repeat containing, nuclear envelope 2, Fcer1g - fc receptor, ige, high affinity i,…
GO:2000145	regulation of cell motility	6.18e-08	1.86e-05	1.94	12888	735	634	70	[Sphk1 - sphingosine kinase 1, Fas - fas (tnf receptor superfamily member 6), Dysf - dysferlin, Fn1 - fibronectin 1, Lpar1 - lysophosphatidic acid receptor 1, Ddr2 - discoidin domain receptor family, member 2, Trip6 - thyroid hormone receptor interactor 6, Ddx58 - dead (asp-glu-ala-asp) box polypeptide 58, Tmsb4x - thymosin, beta 4, x chromosome, Igsf10 - immunoglobulin superfamily, member 10, Sy…
GO:0051094	positive regulation of developmental process	6.42e-08	1.9e-05	1.71	12888	1165	634	98	[Ptgis - prostaglandin i2 (prostacyclin) synthase, Ddr2 - discoidin domain receptor family, member 2, Ascl1 - achaete-scute complex homolog 1 (drosophila), Tmsb4x - thymosin, beta 4, x chromosome, Hspb1 - heat shock protein 1, Pde3a - phosphodiesterase 3a, cgmp inhibited, Socs3 - suppressor of cytokine signaling 3, Mag - myelin-associated glycoprotein, Lims2 - lim and senescent cell antigen like …
GO:0008285	negative regulation of cell proliferation	6.63e-08	1.92e-05	2.16	12888	508	634	54	[Fas - fas (tnf receptor superfamily member 6), Wisp2 - wnt1 inducible signaling pathway protein 2, Pth1r - parathyroid hormone 1 receptor, Fosl1 - fos-like antigen 1, Itga1 - integrin alpha 1, St18 - suppression of tumorigenicity 18, Leprel1 - leprecan-like 1, Cd37 - cd37 antigen, Lif - leukemia inhibitory factor, Cd86 - cd86 antigen, Sh3bp4 - sh3-domain binding protein 4, Lims2 - lim and senesc…
GO:0052548	regulation of endopeptidase activity	6.99e-08	1.99e-05	2.87	12888	227	634	32	[Serpinf2 - serine (or cysteine) peptidase inhibitor, clade f, member 2, Fas - fas (tnf receptor superfamily member 6), Rffl - ring finger and fyve like domain containing protein, Gsn - gelsolin, Dap - death-associated protein, Pawr - prkc, apoptosis, wt1, regulator, Efna1 - ephrin a1, Ret - ret proto-oncogene, Serpind1 - serine (or cysteine) peptidase inhibitor, clade d, member 1, St18 - suppres…
GO:0002682	regulation of immune system process	7.5e-08	2.09e-05	1.87	12888	828	634	76	[Cd59a - cd59a antigen, Nfatc2 - nuclear factor of activated t cells, cytoplasmic, calcineurin dependent 2, Jak3 - janus kinase 3, Fas - fas (tnf receptor superfamily member 6), Sphk1 - sphingosine kinase 1, Dysf - dysferlin, Fos - fbj osteosarcoma oncogene, Gsn - gelsolin, Tlr4 - toll-like receptor 4, Unc93b1 - unc-93 homolog b1 (c. elegans), Ddx58 - dead (asp-glu-ala-asp) box polypeptide 58, Cd…
GO:0042832	defense response to protozoan	7.58e-08	2.07e-05	11.62	12888	14	634	8	[Gbp7 - guanylate binding protein 7, Gbp9 - guanylate-binding protein 9, Myd88 - myeloid differentiation primary response gene 88, Gbp3 - guanylate binding protein 3, Iigp1 - interferon inducible gtpase 1, Bcl3 - b cell leukemia/lymphoma 3, Gbp2 - guanylate binding protein 2, Cd37 - cd37 antigen]
GO:0030334	regulation of cell migration	1.25e-07	3.35e-05	1.93	12888	704	634	67	[Sphk1 - sphingosine kinase 1, Fas - fas (tnf receptor superfamily member 6), Dysf - dysferlin, Fn1 - fibronectin 1, Lpar1 - lysophosphatidic acid receptor 1, Ddr2 - discoidin domain receptor family, member 2, Trip6 - thyroid hormone receptor interactor 6, Ddx58 - dead (asp-glu-ala-asp) box polypeptide 58, Tmsb4x - thymosin, beta 4, x chromosome, Igsf10 - immunoglobulin superfamily, member 10, Sy…
GO:1902531	regulation of intracellular signal transduction	1.33e-07	3.51e-05	1.66	12888	1263	634	103	[Fas - fas (tnf receptor superfamily member 6), Il19 - interleukin 19, Hspb1 - heat shock protein 1, Pde3a - phosphodiesterase 3a, cgmp inhibited, Socs3 - suppressor of cytokine signaling 3, Sh3bp4 - sh3-domain binding protein 4, Pbk - pdz binding kinase, Nox4 - nadph oxidase 4, Ezh2 - enhancer of zeste homolog 2 (drosophila), Npr1 - natriuretic peptide receptor 1, Arhgef37 - rho guanine nucleoti…
GO:0042108	positive regulation of cytokine biosynthetic process	1.49e-07	3.85e-05	5.87	12888	45	634	13	[Fcgr3 - fc receptor, igg, low affinity iii, Irf1 - interferon regulatory factor 1, Myd88 - myeloid differentiation primary response gene 88, Tlr4 - toll-like receptor 4, Cd74 - cd74 antigen (invariant polypeptide of major histocompatibility complex, class ii antigen-associated), Tlr7 - toll-like receptor 7, Hspb1 - heat shock protein 1, Cd276 - cd276 antigen, Thbs1 - thrombospondin 1, Bcl3 - b c…
GO:0010647	positive regulation of cell communication	1.53e-07	3.9e-05	1.64	12888	1299	634	105	[Fas - fas (tnf receptor superfamily member 6), Chrnb4 - cholinergic receptor, nicotinic, beta polypeptide 4, Ptgis - prostaglandin i2 (prostacyclin) synthase, Mal - myelin and lymphocyte protein, t cell differentiation protein, Gsn - gelsolin, Il19 - interleukin 19, Ascl1 - achaete-scute complex homolog 1 (drosophila), Stx3 - syntaxin 3, Lims2 - lim and senescent cell antigen like domains 2, Nox…
GO:0001562	response to protozoan	1.55e-07	3.88e-05	10.84	12888	15	634	8	[Gbp7 - guanylate binding protein 7, Gbp9 - guanylate-binding protein 9, Myd88 - myeloid differentiation primary response gene 88, Gbp3 - guanylate binding protein 3, Iigp1 - interferon inducible gtpase 1, Bcl3 - b cell leukemia/lymphoma 3, Gbp2 - guanylate binding protein 2, Cd37 - cd37 antigen]
GO:0016477	cell migration	1.59e-07	3.9e-05	2.04	12888	578	634	58	[Nfatc2 - nuclear factor of activated t cells, cytoplasmic, calcineurin dependent 2, Fn1 - fibronectin 1, Loxl2 - lysyl oxidase-like 2, Lpar1 - lysophosphatidic acid receptor 1, Ascl1 - achaete-scute complex homolog 1 (drosophila), Cxcl9 - chemokine (c-x-c motif) ligand 9, Itga1 - integrin alpha 1, Syne2 - spectrin repeat containing, nuclear envelope 2, Fcer1g - fc receptor, ige, high affinity i,…
GO:0048522	positive regulation of cellular process	1.63e-07	3.94e-05	1.31	12888	3933	634	253	[Fas - fas (tnf receptor superfamily member 6), Ptgfr - prostaglandin f receptor, Ptgis - prostaglandin i2 (prostacyclin) synthase, Mal - myelin and lymphocyte protein, t cell differentiation protein, Il19 - interleukin 19, Gsn - gelsolin, Ddr2 - discoidin domain receptor family, member 2, Frmd8 - ferm domain containing 8, Unc93b1 - unc-93 homolog b1 (c. elegans), Pth1r - parathyroid hormone 1 re…
GO:0051250	negative regulation of lymphocyte activation	1.71e-07	4.06e-05	4.02	12888	96	634	19	[Jak3 - janus kinase 3, Fas - fas (tnf receptor superfamily member 6), H2-Ab1 - histocompatibility 2, class ii antigen a, beta 1, H2-Aa - histocompatibility 2, class ii antigen a, alpha, Lgals9 - lectin, galactose binding, soluble 9, Sfrp1 - secreted frizzled-related protein 1, Fcgr2b - fc receptor, igg, low affinity iib, Irf1 - interferon regulatory factor 1, Hfe - hemochromatosis, Pawr - prkc, …
GO:0019886	antigen processing and presentation of exogenous peptide antigen via MHC class II	1.87e-07	4.38e-05	12.94	12888	11	634	7	[Cd74 - cd74 antigen (invariant polypeptide of major histocompatibility complex, class ii antigen-associated), H2-Ab1 - histocompatibility 2, class ii antigen a, beta 1, Fcgr2b - fc receptor, igg, low affinity iib, H2-Aa - histocompatibility 2, class ii antigen a, alpha, Fcer1g - fc receptor, ige, high affinity i, gamma polypeptide, Unc93b1 - unc-93 homolog b1 (c. elegans), H2-Eb1 - histocompatib…
GO:0040012	regulation of locomotion	1.94e-07	4.47e-05	1.85	12888	802	634	73	[Fas - fas (tnf receptor superfamily member 6), Sphk1 - sphingosine kinase 1, Fn1 - fibronectin 1, Dysf - dysferlin, Lpar1 - lysophosphatidic acid receptor 1, Ddr2 - discoidin domain receptor family, member 2, Trip6 - thyroid hormone receptor interactor 6, Ddx58 - dead (asp-glu-ala-asp) box polypeptide 58, Igsf10 - immunoglobulin superfamily, member 10, Syne2 - spectrin repeat containing, nuclear…
GO:0043408	regulation of MAPK cascade	1.96e-07	4.43e-05	2.07	12888	539	634	55	[Fas - fas (tnf receptor superfamily member 6), Sphk1 - sphingosine kinase 1, Fn1 - fibronectin 1, Iqgap3 - iq motif containing gtpase activating protein 3, Lpar1 - lysophosphatidic acid receptor 1, Tlr4 - toll-like receptor 4, Itga1 - integrin alpha 1, Cd74 - cd74 antigen (invariant polypeptide of major histocompatibility complex, class ii antigen-associated), Lif - leukemia inhibitory factor, P…
GO:0051239	regulation of multicellular organismal process	1.98e-07	4.42e-05	1.44	12888	2362	634	167	[Slc5a3 - solute carrier family 5 (inositol transporters), member 3, Fas - fas (tnf receptor superfamily member 6), Chrnb4 - cholinergic receptor, nicotinic, beta polypeptide 4, Ptgis - prostaglandin i2 (prostacyclin) synthase, Il19 - interleukin 19, Ddr2 - discoidin domain receptor family, member 2, Frmd8 - ferm domain containing 8, Cenpf - centromere protein f, Unc93b1 - unc-93 homolog b1 (c. e…
GO:0023056	positive regulation of signaling	2.01e-07	4.41e-05	1.63	12888	1306	634	105	[Fas - fas (tnf receptor superfamily member 6), Chrnb4 - cholinergic receptor, nicotinic, beta polypeptide 4, Ptgis - prostaglandin i2 (prostacyclin) synthase, Mal - myelin and lymphocyte protein, t cell differentiation protein, Gsn - gelsolin, Il19 - interleukin 19, Ascl1 - achaete-scute complex homolog 1 (drosophila), Stx3 - syntaxin 3, Lims2 - lim and senescent cell antigen like domains 2, Nox…
GO:0051704	multi-organism process	2.26e-07	4.88e-05	2.02	12888	584	634	58	[Gbp7 - guanylate binding protein 7, Fn1 - fibronectin 1, Tlr4 - toll-like receptor 4, Oas1a - 2'-5' oligoadenylate synthetase 1a, Unc93b1 - unc-93 homolog b1 (c. elegans), Ddx58 - dead (asp-glu-ala-asp) box polypeptide 58, Cxcl9 - chemokine (c-x-c motif) ligand 9, Cd37 - cd37 antigen, Cd86 - cd86 antigen, Gbp9 - guanylate-binding protein 9, Adamts5 - a disintegrin-like and metallopeptidase (repr…
GO:0032675	regulation of interleukin-6 production	2.4e-07	5.12e-05	3.94	12888	98	634	19	[Mbp - myelin basic protein, Lgals9 - lectin, galactose binding, soluble 9, Tnfrsf1a - tumor necrosis factor receptor superfamily, member 1a, Afap1l2 - actin filament associated protein 1-like 2, Myd88 - myeloid differentiation primary response gene 88, Tlr4 - toll-like receptor 4, Unc93b1 - unc-93 homolog b1 (c. elegans), Ddx58 - dead (asp-glu-ala-asp) box polypeptide 58, 5730559C18Rik - riken c…
GO:0065007	biological regulation	2.46e-07	5.17e-05	1.16	12888	7637	634	436	[Ptgfr - prostaglandin f receptor, Ptgis - prostaglandin i2 (prostacyclin) synthase, Mal - myelin and lymphocyte protein, t cell differentiation protein, Gsn - gelsolin, Oas1a - 2'-5' oligoadenylate synthetase 1a, Pth1r - parathyroid hormone 1 receptor, Ascl1 - achaete-scute complex homolog 1 (drosophila), Tmsb4x - thymosin, beta 4, x chromosome, Mafk - v-maf musculoaponeurotic fibrosarcoma oncog…
GO:0006950	response to stress	2.97e-07	6.16e-05	1.5	12888	1870	634	138	[Gbp7 - guanylate binding protein 7, Ptgfr - prostaglandin f receptor, Fas - fas (tnf receptor superfamily member 6), Ptgis - prostaglandin i2 (prostacyclin) synthase, Oas1a - 2'-5' oligoadenylate synthetase 1a, Unc93b1 - unc-93 homolog b1 (c. elegans), Ddx58 - dead (asp-glu-ala-asp) box polypeptide 58, Hspb1 - heat shock protein 1, Gbp9 - guanylate-binding protein 9, Adamts5 - a disintegrin-like…
GO:0043410	positive regulation of MAPK cascade	2.98e-07	6.07e-05	2.29	12888	381	634	43	[Serpinf2 - serine (or cysteine) peptidase inhibitor, clade f, member 2, Sphk1 - sphingosine kinase 1, Iqgap3 - iq motif containing gtpase activating protein 3, Lpar1 - lysophosphatidic acid receptor 1, Tlr4 - toll-like receptor 4, Zak - sterile alpha motif and leucine zipper containing kinase azk, Itga1 - integrin alpha 1, Efna1 - ephrin a1, Ret - ret proto-oncogene, Tgfb1 - transforming growth …
GO:0042742	defense response to bacterium	3.06e-07	6.15e-05	4.07	12888	90	634	18	[Gbp7 - guanylate binding protein 7, Anxa3 - annexin a3, Tnfrsf1a - tumor necrosis factor receptor superfamily, member 1a, Myd88 - myeloid differentiation primary response gene 88, Tlr4 - toll-like receptor 4, Gbp3 - guanylate binding protein 3, Gbp2 - guanylate binding protein 2, Lalba - lactalbumin, alpha, Adamts4 - a disintegrin-like and metallopeptidase (reprolysin type) with thrombospondin t…
GO:0030155	regulation of cell adhesion	3.23e-07	6.4e-05	2.09	12888	505	634	52	[Apbb1ip - amyloid beta (a4) precursor protein-binding, family b, member 1 interacting protein, Jak3 - janus kinase 3, Dysf - dysferlin, Fn1 - fibronectin 1, Gsn - gelsolin, Cd74 - cd74 antigen (invariant polypeptide of major histocompatibility complex, class ii antigen-associated), Cd86 - cd86 antigen, Stx3 - syntaxin 3, Nedd9 - neural precursor cell expressed, developmentally down-regulated gen…
GO:0045785	positive regulation of cell adhesion	3.64e-07	7.12e-05	2.5	12888	293	634	36	[Jak3 - janus kinase 3, Apbb1ip - amyloid beta (a4) precursor protein-binding, family b, member 1 interacting protein, Fn1 - fibronectin 1, Dysf - dysferlin, Pawr - prkc, apoptosis, wt1, regulator, Ret - ret proto-oncogene, Tgfb1 - transforming growth factor, beta 1, Cd74 - cd74 antigen (invariant polypeptide of major histocompatibility complex, class ii antigen-associated), Cd276 - cd276 antigen…
GO:0034097	response to cytokine	3.75e-07	7.24e-05	2.23	12888	411	634	45	[Gbp7 - guanylate binding protein 7, Jak3 - janus kinase 3, Laptm5 - lysosomal-associated protein transmembrane 5, Sphk1 - sphingosine kinase 1, Fn1 - fibronectin 1, Cebpa - ccaat/enhancer binding protein (c/ebp), alpha, Gsn - gelsolin, Gbp3 - guanylate binding protein 3, Tlr4 - toll-like receptor 4, Pcolce - procollagen c-endopeptidase enhancer protein, Ifi47 - interferon gamma inducible protein…
GO:0002237	response to molecule of bacterial origin	3.8e-07	7.26e-05	3.12	12888	163	634	25	[Ptgfr - prostaglandin f receptor, Tlr4 - toll-like receptor 4, Plscr2 - phospholipid scramblase 2, Nos3 - nitric oxide synthase 3, endothelial cell, Vdr - vitamin d receptor, Cxcl9 - chemokine (c-x-c motif) ligand 9, Cxcl5 - chemokine (c-x-c motif) ligand 5, Cd86 - cd86 antigen, Cx3cr1 - chemokine (c-x3-c) receptor 1, Ggt5 - gamma-glutamyltransferase 5, Cebpb - ccaat/enhancer binding protein (c/…
GO:0050866	negative regulation of cell activation	3.86e-07	7.27e-05	3.41	12888	131	634	22	[Jak3 - janus kinase 3, Fas - fas (tnf receptor superfamily member 6), H2-Ab1 - histocompatibility 2, class ii antigen a, beta 1, Fcgr2b - fc receptor, igg, low affinity iib, Sfrp1 - secreted frizzled-related protein 1, Lgals9 - lectin, galactose binding, soluble 9, H2-Aa - histocompatibility 2, class ii antigen a, alpha, Irf1 - interferon regulatory factor 1, Pdgfra - platelet derived growth fac…
GO:0050778	positive regulation of immune response	3.95e-07	7.35e-05	2.49	12888	294	634	36	[Nfatc2 - nuclear factor of activated t cells, cytoplasmic, calcineurin dependent 2, Tlr4 - toll-like receptor 4, Pvr - poliovirus receptor, Unc93b1 - unc-93 homolog b1 (c. elegans), Ddx58 - dead (asp-glu-ala-asp) box polypeptide 58, Tgfb1 - transforming growth factor, beta 1, Cd74 - cd74 antigen (invariant polypeptide of major histocompatibility complex, class ii antigen-associated), Cd276 - cd2…
GO:0080134	regulation of response to stress	4.26e-07	7.82e-05	1.73	12888	973	634	83	[Cd59a - cd59a antigen, Fas - fas (tnf receptor superfamily member 6), Sphk1 - sphingosine kinase 1, Ptgis - prostaglandin i2 (prostacyclin) synthase, Tlr4 - toll-like receptor 4, Unc93b1 - unc-93 homolog b1 (c. elegans), Ddx58 - dead (asp-glu-ala-asp) box polypeptide 58, Nt5e - 5' nucleotidase, ecto, Cd37 - cd37 antigen, Cd74 - cd74 antigen (invariant polypeptide of major histocompatibility comp…
GO:0048870	cell motility	4.3e-07	7.79e-05	1.94	12888	639	634	61	[Nfatc2 - nuclear factor of activated t cells, cytoplasmic, calcineurin dependent 2, Fn1 - fibronectin 1, Loxl2 - lysyl oxidase-like 2, Lpar1 - lysophosphatidic acid receptor 1, Cxcl9 - chemokine (c-x-c motif) ligand 9, Ascl1 - achaete-scute complex homolog 1 (drosophila), Itga1 - integrin alpha 1, Syne2 - spectrin repeat containing, nuclear envelope 2, Fcer1g - fc receptor, ige, high affinity i,…
GO:0051270	regulation of cellular component movement	4.45e-07	7.96e-05	1.82	12888	804	634	72	[Fas - fas (tnf receptor superfamily member 6), Sphk1 - sphingosine kinase 1, Fn1 - fibronectin 1, Dysf - dysferlin, Lpar1 - lysophosphatidic acid receptor 1, Ddr2 - discoidin domain receptor family, member 2, Trip6 - thyroid hormone receptor interactor 6, Ddx58 - dead (asp-glu-ala-asp) box polypeptide 58, Igsf10 - immunoglobulin superfamily, member 10, Syne2 - spectrin repeat containing, nuclear…
GO:0045765	regulation of angiogenesis	5.55e-07	9.82e-05	2.72	12888	224	634	30	[Cd59a - cd59a antigen, Anxa3 - annexin a3, Sphk1 - sphingosine kinase 1, Ptgis - prostaglandin i2 (prostacyclin) synthase, Nos3 - nitric oxide synthase 3, endothelial cell, Efna1 - ephrin a1, Adamts1 - a disintegrin-like and metallopeptidase (reprolysin type) with thrombospondin type 1 motif, 1, Lif - leukemia inhibitory factor, Hspb1 - heat shock protein 1, Serpinf1 - serine (or cysteine) pepti…
GO:0050670	regulation of lymphocyte proliferation	7.04e-07	0.000123	3.42	12888	125	634	21	[Jak3 - janus kinase 3, Nfatc2 - nuclear factor of activated t cells, cytoplasmic, calcineurin dependent 2, H2-Ab1 - histocompatibility 2, class ii antigen a, beta 1, Tnfrsf1b - tumor necrosis factor receptor superfamily, member 1b, H2-Aa - histocompatibility 2, class ii antigen a, alpha, Lgals9 - lectin, galactose binding, soluble 9, Fcgr2b - fc receptor, igg, low affinity iib, Irf1 - interferon…
GO:0070887	cellular response to chemical stimulus	7.57e-07	0.000131	1.63	12888	1211	634	97	[Gbp7 - guanylate binding protein 7, Ptgfr - prostaglandin f receptor, Fas - fas (tnf receptor superfamily member 6), Ptgis - prostaglandin i2 (prostacyclin) synthase, Gsn - gelsolin, Ddx58 - dead (asp-glu-ala-asp) box polypeptide 58, Hspb1 - heat shock protein 1, Pde3a - phosphodiesterase 3a, cgmp inhibited, Socs3 - suppressor of cytokine signaling 3, Gbp9 - guanylate-binding protein 9, Sh3bp4 -…
GO:0042035	regulation of cytokine biosynthetic process	7.92e-07	0.000135	4.48	12888	68	634	15	[Fcgr3 - fc receptor, igg, low affinity iii, Irf1 - interferon regulatory factor 1, Myd88 - myeloid differentiation primary response gene 88, Tlr4 - toll-like receptor 4, Cd74 - cd74 antigen (invariant polypeptide of major histocompatibility complex, class ii antigen-associated), Tlr7 - toll-like receptor 7, Hspb1 - heat shock protein 1, Cd276 - cd276 antigen, Cx3cr1 - chemokine (c-x3-c) receptor…
GO:0002695	negative regulation of leukocyte activation	8.45e-07	0.000142	3.5	12888	116	634	20	[Jak3 - janus kinase 3, Fas - fas (tnf receptor superfamily member 6), H2-Ab1 - histocompatibility 2, class ii antigen a, beta 1, H2-Aa - histocompatibility 2, class ii antigen a, alpha, Lgals9 - lectin, galactose binding, soluble 9, Sfrp1 - secreted frizzled-related protein 1, Fcgr2b - fc receptor, igg, low affinity iib, Irf1 - interferon regulatory factor 1, Hfe - hemochromatosis, Pawr - prkc, …
GO:0009966	regulation of signal transduction	8.9e-07	0.000148	1.44	12888	2115	634	150	[Fas - fas (tnf receptor superfamily member 6), Ptgis - prostaglandin i2 (prostacyclin) synthase, Mal - myelin and lymphocyte protein, t cell differentiation protein, Il19 - interleukin 19, Gsn - gelsolin, Ascl1 - achaete-scute complex homolog 1 (drosophila), Hspb1 - heat shock protein 1, Pde3a - phosphodiesterase 3a, cgmp inhibited, Socs3 - suppressor of cytokine signaling 3, Adamtsl2 - adamts-l…
GO:0002504	antigen processing and presentation of peptide or polysaccharide antigen via MHC class II	8.93e-07	0.000147	10.95	12888	13	634	7	[Cd74 - cd74 antigen (invariant polypeptide of major histocompatibility complex, class ii antigen-associated), H2-Ab1 - histocompatibility 2, class ii antigen a, beta 1, Fcgr2b - fc receptor, igg, low affinity iib, H2-Aa - histocompatibility 2, class ii antigen a, alpha, Fcer1g - fc receptor, ige, high affinity i, gamma polypeptide, Unc93b1 - unc-93 homolog b1 (c. elegans), H2-Eb1 - histocompatib…
GO:0002495	antigen processing and presentation of peptide antigen via MHC class II	8.93e-07	0.000145	10.95	12888	13	634	7	[Cd74 - cd74 antigen (invariant polypeptide of major histocompatibility complex, class ii antigen-associated), H2-Ab1 - histocompatibility 2, class ii antigen a, beta 1, Fcgr2b - fc receptor, igg, low affinity iib, H2-Aa - histocompatibility 2, class ii antigen a, alpha, Fcer1g - fc receptor, ige, high affinity i, gamma polypeptide, Unc93b1 - unc-93 homolog b1 (c. elegans), H2-Eb1 - histocompatib…
GO:0032944	regulation of mononuclear cell proliferation	9.23e-07	0.000149	3.36	12888	127	634	21	[Jak3 - janus kinase 3, Nfatc2 - nuclear factor of activated t cells, cytoplasmic, calcineurin dependent 2, H2-Ab1 - histocompatibility 2, class ii antigen a, beta 1, Tnfrsf1b - tumor necrosis factor receptor superfamily, member 1b, Fcgr2b - fc receptor, igg, low affinity iib, Lgals9 - lectin, galactose binding, soluble 9, H2-Aa - histocompatibility 2, class ii antigen a, alpha, Irf1 - interferon…
GO:1901342	regulation of vasculature development	9.35e-07	0.000149	2.56	12888	254	634	32	[Cd59a - cd59a antigen, Nfatc2 - nuclear factor of activated t cells, cytoplasmic, calcineurin dependent 2, Anxa3 - annexin a3, Sphk1 - sphingosine kinase 1, Ptgis - prostaglandin i2 (prostacyclin) synthase, Nos3 - nitric oxide synthase 3, endothelial cell, Efna1 - ephrin a1, Adamts1 - a disintegrin-like and metallopeptidase (reprolysin type) with thrombospondin type 1 motif, 1, Lif - leukemia in…
GO:0050728	negative regulation of inflammatory response	9.81e-07	0.000154	3.77	12888	97	634	18	[Gpr17 - g protein-coupled receptor 17, Tnfrsf1b - tumor necrosis factor receptor superfamily, member 1b, Lgals9 - lectin, galactose binding, soluble 9, Fcgr2b - fc receptor, igg, low affinity iib, Ptgis - prostaglandin i2 (prostacyclin) synthase, Tnfrsf1a - tumor necrosis factor receptor superfamily, member 1a, Uaca - uveal autoantigen with coiled-coil domains and ankyrin repeats, Pla2g5 - phosp…
GO:0051336	regulation of hydrolase activity	1.1e-06	0.000172	1.83	12888	732	634	66	[Fas - fas (tnf receptor superfamily member 6), Gsn - gelsolin, Lpar1 - lysophosphatidic acid receptor 1, Oas1a - 2'-5' oligoadenylate synthetase 1a, Itga1 - integrin alpha 1, St18 - suppression of tumorigenicity 18, Serpina3m - serine (or cysteine) peptidase inhibitor, clade a, member 3m, Timp1 - tissue inhibitor of metalloproteinase 1, Sh3bp4 - sh3-domain binding protein 4, Nedd9 - neural precu…
GO:0045321	leukocyte activation	1.19e-06	0.000184	2.45	12888	282	634	34	[Jak3 - janus kinase 3, Apbb1ip - amyloid beta (a4) precursor protein-binding, family b, member 1 interacting protein, Anxa3 - annexin a3, Dysf - dysferlin, Tlr4 - toll-like receptor 4, Ctps - cytidine 5'-triphosphate synthase, Tgfb1 - transforming growth factor, beta 1, Cxcl5 - chemokine (c-x-c motif) ligand 5, Cd86 - cd86 antigen, Cd276 - cd276 antigen, Fcer1g - fc receptor, ige, high affinity …
GO:0051249	regulation of lymphocyte activation	1.21e-06	0.000185	2.53	12888	257	634	32	[Jak3 - janus kinase 3, Nfatc2 - nuclear factor of activated t cells, cytoplasmic, calcineurin dependent 2, Fas - fas (tnf receptor superfamily member 6), Gsn - gelsolin, Tlr4 - toll-like receptor 4, Pawr - prkc, apoptosis, wt1, regulator, Tgfb1 - transforming growth factor, beta 1, Parp3 - poly (adp-ribose) polymerase family, member 3, Cd74 - cd74 antigen (invariant polypeptide of major histocom…
GO:0051246	regulation of protein metabolic process	1.26e-06	0.00019	1.44	12888	2057	634	146	[Fas - fas (tnf receptor superfamily member 6), Gsn - gelsolin, Ddr2 - discoidin domain receptor family, member 2, Hspb1 - heat shock protein 1, Socs3 - suppressor of cytokine signaling 3, Nox4 - nadph oxidase 4, Pbk - pdz binding kinase, Kirrel - kin of irre like (drosophila), Ezh2 - enhancer of zeste homolog 2 (drosophila), Mbp - myelin basic protein, Pdgfra - platelet derived growth factor rec…
GO:0001819	positive regulation of cytokine production	1.26e-06	0.000188	2.48	12888	270	634	33	[Serpinf2 - serine (or cysteine) peptidase inhibitor, clade f, member 2, Sphk1 - sphingosine kinase 1, Tlr4 - toll-like receptor 4, Frmd8 - ferm domain containing 8, Unc93b1 - unc-93 homolog b1 (c. elegans), Ddx58 - dead (asp-glu-ala-asp) box polypeptide 58, Tgfb1 - transforming growth factor, beta 1, Cd74 - cd74 antigen (invariant polypeptide of major histocompatibility complex, class ii antigen…
GO:0031349	positive regulation of defense response	1.3e-06	0.000192	2.79	12888	197	634	27	[Cebpa - ccaat/enhancer binding protein (c/ebp), alpha, Ctsc - cathepsin c, Tlr4 - toll-like receptor 4, Pvr - poliovirus receptor, Unc93b1 - unc-93 homolog b1 (c. elegans), Ddx58 - dead (asp-glu-ala-asp) box polypeptide 58, Cd74 - cd74 antigen (invariant polypeptide of major histocompatibility complex, class ii antigen-associated), Cd86 - cd86 antigen, Fcer1g - fc receptor, ige, high affinity i,…
GO:0032103	positive regulation of response to external stimulus	1.31e-06	0.000193	2.72	12888	209	634	28	[Serpinf2 - serine (or cysteine) peptidase inhibitor, clade f, member 2, Fn1 - fibronectin 1, Dysf - dysferlin, Cebpa - ccaat/enhancer binding protein (c/ebp), alpha, Ctsc - cathepsin c, Lpar1 - lysophosphatidic acid receptor 1, Tlr4 - toll-like receptor 4, Tgfb1 - transforming growth factor, beta 1, Cd74 - cd74 antigen (invariant polypeptide of major histocompatibility complex, class ii antigen-…
GO:0032680	regulation of tumor necrosis factor production	1.33e-06	0.000193	3.54	12888	109	634	19	[Fcgr3 - fc receptor, igg, low affinity iii, Lgals9 - lectin, galactose binding, soluble 9, Tnfrsf1a - tumor necrosis factor receptor superfamily, member 1a, Myd88 - myeloid differentiation primary response gene 88, Tspo - translocator protein, Tlr4 - toll-like receptor 4, Frmd8 - ferm domain containing 8, Ddx58 - dead (asp-glu-ala-asp) box polypeptide 58, Hspb1 - heat shock protein 1, Cd24a - cd…
GO:0010033	response to organic substance	1.36e-06	0.000194	1.55	12888	1442	634	110	[Gbp7 - guanylate binding protein 7, Ptgfr - prostaglandin f receptor, Fas - fas (tnf receptor superfamily member 6), Gsn - gelsolin, Ddx58 - dead (asp-glu-ala-asp) box polypeptide 58, Hspb1 - heat shock protein 1, Pde3a - phosphodiesterase 3a, cgmp inhibited, Socs3 - suppressor of cytokine signaling 3, Gbp9 - guanylate-binding protein 9, Fcer1g - fc receptor, ige, high affinity i, gamma polypept…
GO:0070663	regulation of leukocyte proliferation	1.37e-06	0.000194	3.28	12888	130	634	21	[Jak3 - janus kinase 3, Nfatc2 - nuclear factor of activated t cells, cytoplasmic, calcineurin dependent 2, H2-Ab1 - histocompatibility 2, class ii antigen a, beta 1, Tnfrsf1b - tumor necrosis factor receptor superfamily, member 1b, Fcgr2b - fc receptor, igg, low affinity iib, H2-Aa - histocompatibility 2, class ii antigen a, alpha, Lgals9 - lectin, galactose binding, soluble 9, Irf1 - interferon…
GO:0002696	positive regulation of leukocyte activation	1.39e-06	0.000196	2.84	12888	186	634	26	[Jak3 - janus kinase 3, Nfatc2 - nuclear factor of activated t cells, cytoplasmic, calcineurin dependent 2, Cebpa - ccaat/enhancer binding protein (c/ebp), alpha, Ctsc - cathepsin c, Tlr4 - toll-like receptor 4, Tgfb1 - transforming growth factor, beta 1, Cd74 - cd74 antigen (invariant polypeptide of major histocompatibility complex, class ii antigen-associated), Cd86 - cd86 antigen, Cd276 - cd27…
GO:0050789	regulation of biological process	1.43e-06	0.000199	1.16	12888	7258	634	414	[Ptgfr - prostaglandin f receptor, Ptgis - prostaglandin i2 (prostacyclin) synthase, Mal - myelin and lymphocyte protein, t cell differentiation protein, Gsn - gelsolin, Oas1a - 2'-5' oligoadenylate synthetase 1a, Pth1r - parathyroid hormone 1 receptor, Ascl1 - achaete-scute complex homolog 1 (drosophila), Tmsb4x - thymosin, beta 4, x chromosome, Mafk - v-maf musculoaponeurotic fibrosarcoma oncog…
GO:0050867	positive regulation of cell activation	1.43e-06	0.000198	2.77	12888	198	634	27	[Nfatc2 - nuclear factor of activated t cells, cytoplasmic, calcineurin dependent 2, Jak3 - janus kinase 3, Cebpa - ccaat/enhancer binding protein (c/ebp), alpha, Ctsc - cathepsin c, Tlr4 - toll-like receptor 4, Tgfb1 - transforming growth factor, beta 1, Cd74 - cd74 antigen (invariant polypeptide of major histocompatibility complex, class ii antigen-associated), Cd86 - cd86 antigen, Cd276 - cd27…
GO:0006935	chemotaxis	1.48e-06	0.000202	2.9	12888	175	634	25	[Lpar1 - lysophosphatidic acid receptor 1, Cxcl9 - chemokine (c-x-c motif) ligand 9, Itga1 - integrin alpha 1, Sema3d - sema domain, immunoglobulin domain (ig), short basic domain, secreted, (semaphorin) 3d, Plxnb3 - plexin b3, Cxcl5 - chemokine (c-x-c motif) ligand 5, Fcer1g - fc receptor, ige, high affinity i, gamma polypeptide, Cx3cr1 - chemokine (c-x3-c) receptor 1, Ccl7 - chemokine (c-c moti…
GO:0042534	regulation of tumor necrosis factor biosynthetic process	1.53e-06	0.000207	8.56	12888	19	634	8	[Hspb1 - heat shock protein 1, Fcgr3 - fc receptor, igg, low affinity iii, Cx3cr1 - chemokine (c-x3-c) receptor 1, Thbs1 - thrombospondin 1, Tlr4 - toll-like receptor 4, Bcl3 - b cell leukemia/lymphoma 3, Akap12 - a kinase (prka) anchor protein (gravin) 12, Ager - advanced glycosylation end product-specific receptor]
GO:1903555	regulation of tumor necrosis factor superfamily cytokine production	1.54e-06	0.000207	3.51	12888	110	634	19	[Fcgr3 - fc receptor, igg, low affinity iii, Lgals9 - lectin, galactose binding, soluble 9, Tnfrsf1a - tumor necrosis factor receptor superfamily, member 1a, Myd88 - myeloid differentiation primary response gene 88, Tspo - translocator protein, Tlr4 - toll-like receptor 4, Frmd8 - ferm domain containing 8, Ddx58 - dead (asp-glu-ala-asp) box polypeptide 58, Hspb1 - heat shock protein 1, Cd24a - cd…
GO:0045766	positive regulation of angiogenesis	1.56e-06	0.000207	3.26	12888	131	634	21	[Anxa3 - annexin a3, Sphk1 - sphingosine kinase 1, Tnfrsf1a - tumor necrosis factor receptor superfamily, member 1a, Ptgis - prostaglandin i2 (prostacyclin) synthase, Cyp1b1 - cytochrome p450, family 1, subfamily b, polypeptide 1, Nos3 - nitric oxide synthase 3, endothelial cell, Cela1 - chymotrypsin-like elastase family, member 1, Lrg1 - leucine-rich alpha-2-glycoprotein 1, Itgb2 - integrin beta…
GO:0045087	innate immune response	1.73e-06	0.000228	2.63	12888	224	634	29	[Jak3 - janus kinase 3, Tlr4 - toll-like receptor 4, Unc93b1 - unc-93 homolog b1 (c. elegans), Ddx58 - dead (asp-glu-ala-asp) box polypeptide 58, Tgfb1 - transforming growth factor, beta 1, Csf1r - colony stimulating factor 1 receptor, Ptx3 - pentraxin related gene, Fcer1g - fc receptor, ige, high affinity i, gamma polypeptide, Serinc5 - serine incorporator 5, Cx3cr1 - chemokine (c-x3-c) receptor…
GO:0001775	cell activation	1.77e-06	0.000231	2.31	12888	326	634	37	[Jak3 - janus kinase 3, Apbb1ip - amyloid beta (a4) precursor protein-binding, family b, member 1 interacting protein, Anxa3 - annexin a3, Dysf - dysferlin, Fn1 - fibronectin 1, Tlr4 - toll-like receptor 4, Ctps - cytidine 5'-triphosphate synthase, Tgfb1 - transforming growth factor, beta 1, Cxcl5 - chemokine (c-x-c motif) ligand 5, Cd276 - cd276 antigen, Cd86 - cd86 antigen, Timp1 - tissue inhib…
GO:1901701	cellular response to oxygen-containing compound	1.93e-06	0.00025	1.96	12888	550	634	53	[Sphk1 - sphingosine kinase 1, Ptgfr - prostaglandin f receptor, Fos - fbj osteosarcoma oncogene, Tlr4 - toll-like receptor 4, Lpar1 - lysophosphatidic acid receptor 1, Cxcl9 - chemokine (c-x-c motif) ligand 9, Pde3a - phosphodiesterase 3a, cgmp inhibited, Cd86 - cd86 antigen, Sh3bp4 - sh3-domain binding protein 4, Nox4 - nadph oxidase 4, Slc2a4 - solute carrier family 2 (facilitated glucose tran…
GO:0050818	regulation of coagulation	1.94e-06	0.000248	5.19	12888	47	634	12	[Serpinf2 - serine (or cysteine) peptidase inhibitor, clade f, member 2, Ano6 - anoctamin 6, Fcer1g - fc receptor, ige, high affinity i, gamma polypeptide, Thbs1 - thrombospondin 1, Pdgfra - platelet derived growth factor receptor, alpha polypeptide, Tlr4 - toll-like receptor 4, Cav1 - caveolin 1, caveolae protein, Serping1 - serine (or cysteine) peptidase inhibitor, clade g, member 1, Plek - ple…
GO:0042330	taxis	2.03e-06	0.000258	2.86	12888	178	634	25	[Lpar1 - lysophosphatidic acid receptor 1, Cxcl9 - chemokine (c-x-c motif) ligand 9, Itga1 - integrin alpha 1, Sema3d - sema domain, immunoglobulin domain (ig), short basic domain, secreted, (semaphorin) 3d, Plxnb3 - plexin b3, Cxcl5 - chemokine (c-x-c motif) ligand 5, Fcer1g - fc receptor, ige, high affinity i, gamma polypeptide, Cx3cr1 - chemokine (c-x3-c) receptor 1, Ccl7 - chemokine (c-c moti…
GO:0050790	regulation of catalytic activity	2.16e-06	0.000272	1.55	12888	1389	634	106	[Fas - fas (tnf receptor superfamily member 6), Gsn - gelsolin, Ddr2 - discoidin domain receptor family, member 2, Oas1a - 2'-5' oligoadenylate synthetase 1a, Hspb1 - heat shock protein 1, Sh3bp4 - sh3-domain binding protein 4, Nox4 - nadph oxidase 4, Cnn3 - calponin 3, acidic, Ezh2 - enhancer of zeste homolog 2 (drosophila), Mbp - myelin basic protein, Pdgfra - platelet derived growth factor rec…
GO:0050793	regulation of developmental process	2.28e-06	0.000284	1.43	12888	2043	634	144	[Fas - fas (tnf receptor superfamily member 6), Ptgis - prostaglandin i2 (prostacyclin) synthase, Ddr2 - discoidin domain receptor family, member 2, Cenpf - centromere protein f, Ascl1 - achaete-scute complex homolog 1 (drosophila), Igsf10 - immunoglobulin superfamily, member 10, Tmsb4x - thymosin, beta 4, x chromosome, Pde3a - phosphodiesterase 3a, cgmp inhibited, Hspb1 - heat shock protein 1, S…
GO:0050776	regulation of immune response	2.33e-06	0.000288	2.08	12888	439	634	45	[Gpr17 - g protein-coupled receptor 17, Cd59a - cd59a antigen, Jak3 - janus kinase 3, Nfatc2 - nuclear factor of activated t cells, cytoplasmic, calcineurin dependent 2, Tlr4 - toll-like receptor 4, Pawr - prkc, apoptosis, wt1, regulator, Unc93b1 - unc-93 homolog b1 (c. elegans), Pvr - poliovirus receptor, Ddx58 - dead (asp-glu-ala-asp) box polypeptide 58, Tgfb1 - transforming growth factor, beta…
GO:0032502	developmental process	2.38e-06	0.000292	1.3	12888	3465	634	222	[Col20a1 - collagen, type xx, alpha 1, Fas - fas (tnf receptor superfamily member 6), Ptgis - prostaglandin i2 (prostacyclin) synthase, Ddr2 - discoidin domain receptor family, member 2, Unc93b1 - unc-93 homolog b1 (c. elegans), Pth1r - parathyroid hormone 1 receptor, Ascl1 - achaete-scute complex homolog 1 (drosophila), Igsf10 - immunoglobulin superfamily, member 10, Pde3a - phosphodiesterase 3a…
GO:0032102	negative regulation of response to external stimulus	2.41e-06	0.000293	2.54	12888	240	634	30	[Gpr17 - g protein-coupled receptor 17, Ptgis - prostaglandin i2 (prostacyclin) synthase, Nt5e - 5' nucleotidase, ecto, Sema3d - sema domain, immunoglobulin domain (ig), short basic domain, secreted, (semaphorin) 3d, Cd276 - cd276 antigen, Socs3 - suppressor of cytokine signaling 3, Serpinf1 - serine (or cysteine) peptidase inhibitor, clade f, member 1, Cx3cr1 - chemokine (c-x3-c) receptor 1, Pbk…
GO:0010562	positive regulation of phosphorus metabolic process	2.43e-06	0.000293	1.75	12888	826	634	71	[Sphk1 - sphingosine kinase 1, Fas - fas (tnf receptor superfamily member 6), Iqgap3 - iq motif containing gtpase activating protein 3, Lpar1 - lysophosphatidic acid receptor 1, Ddr2 - discoidin domain receptor family, member 2, Tlr4 - toll-like receptor 4, Pth1r - parathyroid hormone 1 receptor, Itga1 - integrin alpha 1, Cd74 - cd74 antigen (invariant polypeptide of major histocompatibility comp…
GO:0045937	positive regulation of phosphate metabolic process	2.43e-06	0.000291	1.75	12888	826	634	71	[Sphk1 - sphingosine kinase 1, Fas - fas (tnf receptor superfamily member 6), Iqgap3 - iq motif containing gtpase activating protein 3, Lpar1 - lysophosphatidic acid receptor 1, Ddr2 - discoidin domain receptor family, member 2, Tlr4 - toll-like receptor 4, Pth1r - parathyroid hormone 1 receptor, Itga1 - integrin alpha 1, Cd74 - cd74 antigen (invariant polypeptide of major histocompatibility comp…
GO:0002478	antigen processing and presentation of exogenous peptide antigen	2.44e-06	0.00029	8.13	12888	20	634	8	[Cd74 - cd74 antigen (invariant polypeptide of major histocompatibility complex, class ii antigen-associated), H2-Ab1 - histocompatibility 2, class ii antigen a, beta 1, Fcgr3 - fc receptor, igg, low affinity iii, Fcgr2b - fc receptor, igg, low affinity iib, H2-Aa - histocompatibility 2, class ii antigen a, alpha, Fcer1g - fc receptor, ige, high affinity i, gamma polypeptide, Unc93b1 - unc-93 hom…
GO:0003414	chondrocyte morphogenesis involved in endochondral bone morphogenesis	2.45e-06	0.000289	12.2	12888	10	634	6	[Col12a1 - collagen, type xii, alpha 1, Col20a1 - collagen, type xx, alpha 1, Vwa1 - von willebrand factor a domain containing 1, Col6a2 - collagen, type vi, alpha 2, Col6a1 - collagen, type vi, alpha 1, Matn4 - matrilin 4]
GO:0003422	growth plate cartilage morphogenesis	2.45e-06	0.000287	12.2	12888	10	634	6	[Col12a1 - collagen, type xii, alpha 1, Col20a1 - collagen, type xx, alpha 1, Vwa1 - von willebrand factor a domain containing 1, Col6a2 - collagen, type vi, alpha 2, Col6a1 - collagen, type vi, alpha 1, Matn4 - matrilin 4]
GO:0003429	growth plate cartilage chondrocyte morphogenesis	2.45e-06	0.000284	12.2	12888	10	634	6	[Col12a1 - collagen, type xii, alpha 1, Col20a1 - collagen, type xx, alpha 1, Vwa1 - von willebrand factor a domain containing 1, Col6a2 - collagen, type vi, alpha 2, Col6a1 - collagen, type vi, alpha 1, Matn4 - matrilin 4]
GO:0090171	chondrocyte morphogenesis	2.45e-06	0.000282	12.2	12888	10	634	6	[Col12a1 - collagen, type xii, alpha 1, Col20a1 - collagen, type xx, alpha 1, Vwa1 - von willebrand factor a domain containing 1, Col6a2 - collagen, type vi, alpha 2, Col6a1 - collagen, type vi, alpha 1, Matn4 - matrilin 4]
GO:0002274	myeloid leukocyte activation	2.47e-06	0.000282	4.12	12888	74	634	15	[Anxa3 - annexin a3, Sbno2 - strawberry notch homolog 2 (drosophila), Dysf - dysferlin, Fcgr3 - fc receptor, igg, low affinity iii, Dock2 - dedicator of cyto-kinesis 2, Tlr4 - toll-like receptor 4, Tgfb1 - transforming growth factor, beta 1, Tnfsf9 - tumor necrosis factor (ligand) superfamily, member 9, Tlr7 - toll-like receptor 7, Cxcl5 - chemokine (c-x-c motif) ligand 5, Fcer1g - fc receptor, i…
GO:0050868	negative regulation of T cell activation	2.47e-06	0.00028	4.12	12888	74	634	15	[Jak3 - janus kinase 3, H2-Ab1 - histocompatibility 2, class ii antigen a, beta 1, H2-Aa - histocompatibility 2, class ii antigen a, alpha, Lgals9 - lectin, galactose binding, soluble 9, Irf1 - interferon regulatory factor 1, Hfe - hemochromatosis, Pawr - prkc, apoptosis, wt1, regulator, Tgfb1 - transforming growth factor, beta 1, Cd74 - cd74 antigen (invariant polypeptide of major histocompatibi…
GO:1902105	regulation of leukocyte differentiation	3.74e-06	0.000421	2.76	12888	184	634	25	[Jak3 - janus kinase 3, Fas - fas (tnf receptor superfamily member 6), Fos - fbj osteosarcoma oncogene, Tmem176b - transmembrane protein 176b, Tgfb1 - transforming growth factor, beta 1, Cd74 - cd74 antigen (invariant polypeptide of major histocompatibility complex, class ii antigen-associated), Lif - leukemia inhibitory factor, Csf1r - colony stimulating factor 1 receptor, Bmp4 - bone morphogene…
GO:0019724	B cell mediated immunity	3.77e-06	0.000421	7.74	12888	21	634	8	[Cd74 - cd74 antigen (invariant polypeptide of major histocompatibility complex, class ii antigen-associated), Fas - fas (tnf receptor superfamily member 6), H2-Ab1 - histocompatibility 2, class ii antigen a, beta 1, Fcgr3 - fc receptor, igg, low affinity iii, Fcgr2b - fc receptor, igg, low affinity iib, Fcer1g - fc receptor, ige, high affinity i, gamma polypeptide, Myd88 - myeloid differentiatio…
GO:1903039	positive regulation of leukocyte cell-cell adhesion	4e-06	0.000442	3.3	12888	117	634	19	[Jak3 - janus kinase 3, Lgals1 - lectin, galactose binding, soluble 1, H2-Ab1 - histocompatibility 2, class ii antigen a, beta 1, H2-Aa - histocompatibility 2, class ii antigen a, alpha, Lgals9 - lectin, galactose binding, soluble 9, Irf1 - interferon regulatory factor 1, Malt1 - mucosa associated lymphoid tissue lymphoma translocation gene 1, Pawr - prkc, apoptosis, wt1, regulator, Tnfsf11 - tum…
GO:0002822	regulation of adaptive immune response based on somatic recombination of immune receptors built from immunoglobulin superfamily domains	4.43e-06	0.000487	3.56	12888	97	634	17	[Jak3 - janus kinase 3, Fcgr3 - fc receptor, igg, low affinity iii, H2-Ab1 - histocompatibility 2, class ii antigen a, beta 1, Tnfrsf1b - tumor necrosis factor receptor superfamily, member 1b, Fcgr2b - fc receptor, igg, low affinity iib, Irf1 - interferon regulatory factor 1, Malt1 - mucosa associated lymphoid tissue lymphoma translocation gene 1, Hfe - hemochromatosis, Pvr - poliovirus receptor,…
GO:0043406	positive regulation of MAP kinase activity	4.48e-06	0.000488	2.8	12888	174	634	24	[Ezh2 - enhancer of zeste homolog 2 (drosophila), Gadd45b - growth arrest and dna-damage-inducible 45 beta, Iqgap3 - iq motif containing gtpase activating protein 3, Tlr4 - toll-like receptor 4, Lpar1 - lysophosphatidic acid receptor 1, Zak - sterile alpha motif and leucine zipper containing kinase azk, Itga1 - integrin alpha 1, Tnfsf11 - tumor necrosis factor (ligand) superfamily, member 11, 573…
GO:1900046	regulation of hemostasis	5.09e-06	0.000551	5.2	12888	43	634	11	[Serpinf2 - serine (or cysteine) peptidase inhibitor, clade f, member 2, Ano6 - anoctamin 6, Fcer1g - fc receptor, ige, high affinity i, gamma polypeptide, Thbs1 - thrombospondin 1, Pdgfra - platelet derived growth factor receptor, alpha polypeptide, Tlr4 - toll-like receptor 4, Cav1 - caveolin 1, caveolae protein, Serping1 - serine (or cysteine) peptidase inhibitor, clade g, member 1, Plek - ple…
GO:0030193	regulation of blood coagulation	5.09e-06	0.000547	5.2	12888	43	634	11	[Serpinf2 - serine (or cysteine) peptidase inhibitor, clade f, member 2, Ano6 - anoctamin 6, Fcer1g - fc receptor, ige, high affinity i, gamma polypeptide, Thbs1 - thrombospondin 1, Pdgfra - platelet derived growth factor receptor, alpha polypeptide, Tlr4 - toll-like receptor 4, Cav1 - caveolin 1, caveolae protein, Serping1 - serine (or cysteine) peptidase inhibitor, clade g, member 1, Plek - ple…
GO:0002819	regulation of adaptive immune response	5.61e-06	0.000597	3.36	12888	109	634	18	[Jak3 - janus kinase 3, H2-Ab1 - histocompatibility 2, class ii antigen a, beta 1, Fcgr3 - fc receptor, igg, low affinity iii, Tnfrsf1b - tumor necrosis factor receptor superfamily, member 1b, Fcgr2b - fc receptor, igg, low affinity iib, Irf1 - interferon regulatory factor 1, Malt1 - mucosa associated lymphoid tissue lymphoma translocation gene 1, Hfe - hemochromatosis, Pvr - poliovirus receptor,…
GO:0042325	regulation of phosphorylation	5.77e-06	0.000611	1.58	12888	1169	634	91	[Fas - fas (tnf receptor superfamily member 6), Sphk1 - sphingosine kinase 1, Fn1 - fibronectin 1, Iqgap3 - iq motif containing gtpase activating protein 3, Lpar1 - lysophosphatidic acid receptor 1, Tlr4 - toll-like receptor 4, Ddr2 - discoidin domain receptor family, member 2, Itga1 - integrin alpha 1, Cd74 - cd74 antigen (invariant polypeptide of major histocompatibility complex, class ii antig…
GO:0007162	negative regulation of cell adhesion	5.88e-06	0.000617	2.58	12888	213	634	27	[Jak3 - janus kinase 3, Pawr - prkc, apoptosis, wt1, regulator, Epcam - epithelial cell adhesion molecule, Tgfb1 - transforming growth factor, beta 1, Cd74 - cd74 antigen (invariant polypeptide of major histocompatibility complex, class ii antigen-associated), Plxnb3 - plexin b3, Cd86 - cd86 antigen, Cd276 - cd276 antigen, Bmp4 - bone morphogenetic protein 4, Cebpb - ccaat/enhancer binding protei…
GO:0019220	regulation of phosphate metabolic process	6.03e-06	0.000629	1.54	12888	1303	634	99	[Fas - fas (tnf receptor superfamily member 6), Ddr2 - discoidin domain receptor family, member 2, Pth1r - parathyroid hormone 1 receptor, Hspb1 - heat shock protein 1, Socs3 - suppressor of cytokine signaling 3, Pbk - pdz binding kinase, Nox4 - nadph oxidase 4, Kirrel - kin of irre like (drosophila), Ezh2 - enhancer of zeste homolog 2 (drosophila), Pdgfra - platelet derived growth factor recepto…
GO:0050863	regulation of T cell activation	6.05e-06	0.000626	2.76	12888	177	634	24	[Jak3 - janus kinase 3, Lgals1 - lectin, galactose binding, soluble 1, H2-Ab1 - histocompatibility 2, class ii antigen a, beta 1, Tnfrsf1b - tumor necrosis factor receptor superfamily, member 1b, Lgals9 - lectin, galactose binding, soluble 9, H2-Aa - histocompatibility 2, class ii antigen a, alpha, Malt1 - mucosa associated lymphoid tissue lymphoma translocation gene 1, Irf1 - interferon regulato…
GO:0050730	regulation of peptidyl-tyrosine phosphorylation	6.08e-06	0.000625	2.69	12888	189	634	25	[Ctf1 - cardiotrophin 1, Tlr4 - toll-like receptor 4, Efna1 - ephrin a1, Tgfb1 - transforming growth factor, beta 1, Cd74 - cd74 antigen (invariant polypeptide of major histocompatibility complex, class ii antigen-associated), Lif - leukemia inhibitory factor, Csf1r - colony stimulating factor 1 receptor, Socs3 - suppressor of cytokine signaling 3, Nedd9 - neural precursor cell expressed, develop…
GO:0051174	regulation of phosphorus metabolic process	6.23e-06	0.000636	1.54	12888	1304	634	99	[Fas - fas (tnf receptor superfamily member 6), Ddr2 - discoidin domain receptor family, member 2, Pth1r - parathyroid hormone 1 receptor, Hspb1 - heat shock protein 1, Socs3 - suppressor of cytokine signaling 3, Pbk - pdz binding kinase, Nox4 - nadph oxidase 4, Kirrel - kin of irre like (drosophila), Ezh2 - enhancer of zeste homolog 2 (drosophila), Pdgfra - platelet derived growth factor recepto…
GO:0006690	icosanoid metabolic process	6.49e-06	0.000658	5.08	12888	44	634	11	[Cd74 - cd74 antigen (invariant polypeptide of major histocompatibility complex, class ii antigen-associated), Sphk1 - sphingosine kinase 1, Akr1c13 - aldo-keto reductase family 1, member c13, Cyp1b1 - cytochrome p450, family 1, subfamily b, polypeptide 1, Tnfrsf1a - tumor necrosis factor receptor superfamily, member 1a, Ptgis - prostaglandin i2 (prostacyclin) synthase, Ggt5 - gamma-glutamyltrans…
GO:0002253	activation of immune response	6.54e-06	0.000658	2.99	12888	143	634	21	[C1rb - complement component 1, r subcomponent b, Nfatc2 - nuclear factor of activated t cells, cytoplasmic, calcineurin dependent 2, Mog - myelin oligodendrocyte glycoprotein, Lgals9 - lectin, galactose binding, soluble 9, Fcgr2b - fc receptor, igg, low affinity iib, C1rl - complement component 1, r subcomponent-like, Malt1 - mucosa associated lymphoid tissue lymphoma translocation gene 1, Myd88…
GO:0097190	apoptotic signaling pathway	6.6e-06	0.000659	2.62	12888	202	634	26	[Fas - fas (tnf receptor superfamily member 6), Ptgis - prostaglandin i2 (prostacyclin) synthase, Pawr - prkc, apoptosis, wt1, regulator, Vdr - vitamin d receptor, Dap - death-associated protein, Tgfb1 - transforming growth factor, beta 1, Cebpb - ccaat/enhancer binding protein (c/ebp), beta, Eda2r - ectodysplasin a2 receptor, Clca2 - chloride channel calcium activated 2, Tnfrsf10b - tumor necros…
GO:0061041	regulation of wound healing	6.98e-06	0.000693	3.61	12888	90	634	16	[Serpinf2 - serine (or cysteine) peptidase inhibitor, clade f, member 2, Ano6 - anoctamin 6, Tlr4 - toll-like receptor 4, Pdgfra - platelet derived growth factor receptor, alpha polypeptide, Serping1 - serine (or cysteine) peptidase inhibitor, clade g, member 1, Plek - pleckstrin, Tnfrsf12a - tumor necrosis factor receptor superfamily, member 12a, Mylk - myosin, light polypeptide kinase, Fcer1g -…
GO:0042327	positive regulation of phosphorylation	7.37e-06	0.000726	1.73	12888	774	634	66	[Sphk1 - sphingosine kinase 1, Fas - fas (tnf receptor superfamily member 6), Iqgap3 - iq motif containing gtpase activating protein 3, Lpar1 - lysophosphatidic acid receptor 1, Ddr2 - discoidin domain receptor family, member 2, Tlr4 - toll-like receptor 4, Itga1 - integrin alpha 1, Cd74 - cd74 antigen (invariant polypeptide of major histocompatibility complex, class ii antigen-associated), Lif -…
GO:0031099	regeneration	7.5e-06	0.000735	4.01	12888	71	634	14	[Fas - fas (tnf receptor superfamily member 6), Ezh2 - enhancer of zeste homolog 2 (drosophila), Dysf - dysferlin, Bin3 - bridging integrator 3, Cdk1 - cyclin-dependent kinase 1, Tgfb1 - transforming growth factor, beta 1, Igsf10 - immunoglobulin superfamily, member 10, Tmem8c - transmembrane protein 8c, Lif - leukemia inhibitory factor, Cxcl5 - chemokine (c-x-c motif) ligand 5, Mag - myelin-asso…
GO:0022408	negative regulation of cell-cell adhesion	7.52e-06	0.000731	3.17	12888	122	634	19	[Jak3 - janus kinase 3, Mbp - myelin basic protein, H2-Ab1 - histocompatibility 2, class ii antigen a, beta 1, H2-Aa - histocompatibility 2, class ii antigen a, alpha, Lgals9 - lectin, galactose binding, soluble 9, Irf1 - interferon regulatory factor 1, Hfe - hemochromatosis, Pawr - prkc, apoptosis, wt1, regulator, Epcam - epithelial cell adhesion molecule, Tgfb1 - transforming growth factor, bet…
GO:0032755	positive regulation of interleukin-6 production	7.81e-06	0.000754	4.26	12888	62	634	13	[Mbp - myelin basic protein, Lgals9 - lectin, galactose binding, soluble 9, Myd88 - myeloid differentiation primary response gene 88, Tlr4 - toll-like receptor 4, Unc93b1 - unc-93 homolog b1 (c. elegans), Ddx58 - dead (asp-glu-ala-asp) box polypeptide 58, 5730559C18Rik - riken cdna 5730559c18 gene, Cd74 - cd74 antigen (invariant polypeptide of major histocompatibility complex, class ii antigen-as…
GO:0000904	cell morphogenesis involved in differentiation	8.49e-06	0.000815	3.14	12888	123	634	19	[Col12a1 - collagen, type xii, alpha 1, Col20a1 - collagen, type xx, alpha 1, Fn1 - fibronectin 1, Sfrp1 - secreted frizzled-related protein 1, Col18a1 - collagen, type xviii, alpha 1, Lect1 - leukocyte cell derived chemotaxin 1, Itga8 - integrin alpha 8, Efna1 - ephrin a1, Antxr1 - anthrax toxin receptor 1, Notch4 - notch 4, Vwa1 - von willebrand factor a domain containing 1, Epha2 - eph recepto…
GO:0016064	immunoglobulin mediated immune response	8.51e-06	0.000812	8.37	12888	17	634	7	[Cd74 - cd74 antigen (invariant polypeptide of major histocompatibility complex, class ii antigen-associated), H2-Ab1 - histocompatibility 2, class ii antigen a, beta 1, Fcgr3 - fc receptor, igg, low affinity iii, Fcgr2b - fc receptor, igg, low affinity iib, Fcer1g - fc receptor, ige, high affinity i, gamma polypeptide, Myd88 - myeloid differentiation primary response gene 88, Bcl3 - b cell leuke…
GO:0048869	cellular developmental process	8.8e-06	0.000834	1.4	12888	2058	634	142	[Col20a1 - collagen, type xx, alpha 1, Rbm46 - rna binding motif protein 46, Pth1r - parathyroid hormone 1 receptor, Unc93b1 - unc-93 homolog b1 (c. elegans), Ascl1 - achaete-scute complex homolog 1 (drosophila), Cdh24 - cadherin-like 24, Bfsp2 - beaded filament structural protein 2, phakinin, Pde3a - phosphodiesterase 3a, cgmp inhibited, Socs3 - suppressor of cytokine signaling 3, Ugt8a - udp ga…
GO:0042129	regulation of T cell proliferation	9.35e-06	0.00088	3.54	12888	92	634	16	[Jak3 - janus kinase 3, Tnfrsf1b - tumor necrosis factor receptor superfamily, member 1b, H2-Ab1 - histocompatibility 2, class ii antigen a, beta 1, H2-Aa - histocompatibility 2, class ii antigen a, alpha, Lgals9 - lectin, galactose binding, soluble 9, Irf1 - interferon regulatory factor 1, Pawr - prkc, apoptosis, wt1, regulator, Tgfb1 - transforming growth factor, beta 1, Tnfsf9 - tumor necrosis…
GO:1903038	negative regulation of leukocyte cell-cell adhesion	9.38e-06	0.000877	3.72	12888	82	634	15	[Jak3 - janus kinase 3, H2-Ab1 - histocompatibility 2, class ii antigen a, beta 1, Lgals9 - lectin, galactose binding, soluble 9, H2-Aa - histocompatibility 2, class ii antigen a, alpha, Irf1 - interferon regulatory factor 1, Hfe - hemochromatosis, Pawr - prkc, apoptosis, wt1, regulator, Tgfb1 - transforming growth factor, beta 1, Cd74 - cd74 antigen (invariant polypeptide of major histocompatibi…
GO:0043405	regulation of MAP kinase activity	9.4e-06	0.000874	2.46	12888	231	634	28	[Iqgap3 - iq motif containing gtpase activating protein 3, Tlr4 - toll-like receptor 4, Lpar1 - lysophosphatidic acid receptor 1, Zak - sterile alpha motif and leucine zipper containing kinase azk, Itga1 - integrin alpha 1, Tgfb1 - transforming growth factor, beta 1, Ret - ret proto-oncogene, Cd74 - cd74 antigen (invariant polypeptide of major histocompatibility complex, class ii antigen-associat…
GO:0000902	cell morphogenesis	9.44e-06	0.000871	2.57	12888	206	634	26	[Col12a1 - collagen, type xii, alpha 1, Col20a1 - collagen, type xx, alpha 1, Fn1 - fibronectin 1, Col18a1 - collagen, type xviii, alpha 1, Itga8 - integrin alpha 8, Unc93b1 - unc-93 homolog b1 (c. elegans), Vdr - vitamin d receptor, Efna1 - ephrin a1, Cdh24 - cadherin-like 24, Antxr1 - anthrax toxin receptor 1, Nox4 - nadph oxidase 4, Flnb - filamin, beta, Sfrp1 - secreted frizzled-related prote…
GO:0019221	cytokine-mediated signaling pathway	9.44e-06	0.000866	3.01	12888	135	634	20	[Jak3 - janus kinase 3, Cebpa - ccaat/enhancer binding protein (c/ebp), alpha, Tnfrsf1a - tumor necrosis factor receptor superfamily, member 1a, Irf1 - interferon regulatory factor 1, Myd88 - myeloid differentiation primary response gene 88, Tnfsf11 - tumor necrosis factor (ligand) superfamily, member 11, Cxcl9 - chemokine (c-x-c motif) ligand 9, Klf6 - kruppel-like factor 6, St18 - suppression o…
GO:2000026	regulation of multicellular organismal development	9.57e-06	0.000873	1.46	12888	1641	634	118	[Fas - fas (tnf receptor superfamily member 6), Ptgis - prostaglandin i2 (prostacyclin) synthase, Ddr2 - discoidin domain receptor family, member 2, Cenpf - centromere protein f, Ascl1 - achaete-scute complex homolog 1 (drosophila), Igsf10 - immunoglobulin superfamily, member 10, Hspb1 - heat shock protein 1, Mag - myelin-associated glycoprotein, Lims2 - lim and senescent cell antigen like domain…
GO:0002703	regulation of leukocyte mediated immunity	9.58e-06	0.000867	3.11	12888	124	634	19	[Jak3 - janus kinase 3, Fcgr3 - fc receptor, igg, low affinity iii, Tnfrsf1b - tumor necrosis factor receptor superfamily, member 1b, Fcgr2b - fc receptor, igg, low affinity iib, Lgals9 - lectin, galactose binding, soluble 9, Malt1 - mucosa associated lymphoid tissue lymphoma translocation gene 1, Tlr4 - toll-like receptor 4, Hfe - hemochromatosis, Pvr - poliovirus receptor, Ddx58 - dead (asp-glu…
GO:0001932	regulation of protein phosphorylation	1.01e-05	0.000908	1.6	12888	1070	634	84	[Fas - fas (tnf receptor superfamily member 6), Sphk1 - sphingosine kinase 1, Fn1 - fibronectin 1, Iqgap3 - iq motif containing gtpase activating protein 3, Lpar1 - lysophosphatidic acid receptor 1, Tlr4 - toll-like receptor 4, Ddr2 - discoidin domain receptor family, member 2, Itga1 - integrin alpha 1, Cd74 - cd74 antigen (invariant polypeptide of major histocompatibility complex, class ii antig…
GO:0071310	cellular response to organic substance	1.03e-05	0.000921	1.63	12888	973	634	78	[Gbp7 - guanylate binding protein 7, Jak3 - janus kinase 3, Ptgfr - prostaglandin f receptor, Sphk1 - sphingosine kinase 1, Fn1 - fibronectin 1, Iqgap3 - iq motif containing gtpase activating protein 3, Gsn - gelsolin, Lpar1 - lysophosphatidic acid receptor 1, Tlr4 - toll-like receptor 4, Cxcl9 - chemokine (c-x-c motif) ligand 9, Ddx58 - dead (asp-glu-ala-asp) box polypeptide 58, Pde3a - phosphod…
GO:0050794	regulation of cellular process	1.03e-05	0.000916	1.16	12888	6863	634	390	[Ptgfr - prostaglandin f receptor, Ptgis - prostaglandin i2 (prostacyclin) synthase, Mal - myelin and lymphocyte protein, t cell differentiation protein, Gsn - gelsolin, Oas1a - 2'-5' oligoadenylate synthetase 1a, Pth1r - parathyroid hormone 1 receptor, Ascl1 - achaete-scute complex homolog 1 (drosophila), Tmsb4x - thymosin, beta 4, x chromosome, Mafk - v-maf musculoaponeurotic fibrosarcoma oncog…
GO:0001934	positive regulation of protein phosphorylation	1.07e-05	0.000944	1.74	12888	736	634	63	[Sphk1 - sphingosine kinase 1, Fas - fas (tnf receptor superfamily member 6), Iqgap3 - iq motif containing gtpase activating protein 3, Lpar1 - lysophosphatidic acid receptor 1, Ddr2 - discoidin domain receptor family, member 2, Tlr4 - toll-like receptor 4, Itga1 - integrin alpha 1, Cd74 - cd74 antigen (invariant polypeptide of major histocompatibility complex, class ii antigen-associated), Lif -…
GO:1903037	regulation of leukocyte cell-cell adhesion	1.08e-05	0.000947	2.73	12888	171	634	23	[Jak3 - janus kinase 3, Lgals1 - lectin, galactose binding, soluble 1, H2-Ab1 - histocompatibility 2, class ii antigen a, beta 1, Lgals9 - lectin, galactose binding, soluble 9, H2-Aa - histocompatibility 2, class ii antigen a, alpha, Irf1 - interferon regulatory factor 1, Malt1 - mucosa associated lymphoid tissue lymphoma translocation gene 1, Hfe - hemochromatosis, Pawr - prkc, apoptosis, wt1, r…
GO:0008366	axon ensheathment	1.09e-05	0.000955	3.67	12888	83	634	15	[Cldn11 - claudin 11, Bcas1 - breast carcinoma amplified sequence 1, Mbp - myelin basic protein, Pllp - plasma membrane proteolipid, Mal - myelin and lymphocyte protein, t cell differentiation protein, Gpr126 - g protein-coupled receptor 126, Nfasc - neurofascin, Plp1 - proteolipid protein (myelin) 1, Sox10 - sry-box containing gene 10, Tgfb1 - transforming growth factor, beta 1, Ugt8a - udp gala…
GO:0007272	ensheathment of neurons	1.09e-05	0.000949	3.67	12888	83	634	15	[Cldn11 - claudin 11, Bcas1 - breast carcinoma amplified sequence 1, Mbp - myelin basic protein, Pllp - plasma membrane proteolipid, Mal - myelin and lymphocyte protein, t cell differentiation protein, Gpr126 - g protein-coupled receptor 126, Nfasc - neurofascin, Plp1 - proteolipid protein (myelin) 1, Sox10 - sry-box containing gene 10, Tgfb1 - transforming growth factor, beta 1, Ugt8a - udp gala…
GO:1904018	positive regulation of vasculature development	1.13e-05	0.000973	2.88	12888	148	634	21	[Anxa3 - annexin a3, Sphk1 - sphingosine kinase 1, Tnfrsf1a - tumor necrosis factor receptor superfamily, member 1a, Ptgis - prostaglandin i2 (prostacyclin) synthase, Cyp1b1 - cytochrome p450, family 1, subfamily b, polypeptide 1, Nos3 - nitric oxide synthase 3, endothelial cell, Cela1 - chymotrypsin-like elastase family, member 1, Lrg1 - leucine-rich alpha-2-glycoprotein 1, Itgb2 - integrin beta…
GO:0002250	adaptive immune response	1.17e-05	0.001	3.32	12888	104	634	17	[Jak3 - janus kinase 3, Fas - fas (tnf receptor superfamily member 6), Emr1 - egf-like module containing, mucin-like, hormone receptor-like sequence 1, H2-Ab1 - histocompatibility 2, class ii antigen a, beta 1, Fcgr3 - fc receptor, igg, low affinity iii, H2-Aa - histocompatibility 2, class ii antigen a, alpha, Fcgr2b - fc receptor, igg, low affinity iib, Myd88 - myeloid differentiation primary re…
GO:0002449	lymphocyte mediated immunity	1.34e-05	0.00115	5.21	12888	39	634	10	[Cd74 - cd74 antigen (invariant polypeptide of major histocompatibility complex, class ii antigen-associated), Fas - fas (tnf receptor superfamily member 6), H2-Ab1 - histocompatibility 2, class ii antigen a, beta 1, Fcgr3 - fc receptor, igg, low affinity iii, Fcgr2b - fc receptor, igg, low affinity iib, Fcer1g - fc receptor, ige, high affinity i, gamma polypeptide, Myd88 - myeloid differentiatio…
GO:0022603	regulation of anatomical structure morphogenesis	1.36e-05	0.00115	1.67	12888	852	634	70	[Cd59a - cd59a antigen, Nfatc2 - nuclear factor of activated t cells, cytoplasmic, calcineurin dependent 2, Cd53 - cd53 antigen, Sphk1 - sphingosine kinase 1, Fn1 - fibronectin 1, Ptgis - prostaglandin i2 (prostacyclin) synthase, Myl12a - myosin, light chain 12a, regulatory, non-sarcomeric, Lpar1 - lysophosphatidic acid receptor 1, Cxcl9 - chemokine (c-x-c motif) ligand 9, Lif - leukemia inhibito…
GO:0050870	positive regulation of T cell activation	1.52e-05	0.00128	3.26	12888	106	634	17	[Jak3 - janus kinase 3, Lgals1 - lectin, galactose binding, soluble 1, H2-Ab1 - histocompatibility 2, class ii antigen a, beta 1, Lgals9 - lectin, galactose binding, soluble 9, H2-Aa - histocompatibility 2, class ii antigen a, alpha, Irf1 - interferon regulatory factor 1, Malt1 - mucosa associated lymphoid tissue lymphoma translocation gene 1, Tnfsf11 - tumor necrosis factor (ligand) superfamily,…
GO:0032945	negative regulation of mononuclear cell proliferation	1.6e-05	0.00134	4.66	12888	48	634	11	[Cd276 - cd276 antigen, Cd86 - cd86 antigen, H2-Ab1 - histocompatibility 2, class ii antigen a, beta 1, Cd24a - cd24a antigen, Lgals9 - lectin, galactose binding, soluble 9, H2-Aa - histocompatibility 2, class ii antigen a, alpha, Fcgr2b - fc receptor, igg, low affinity iib, Bmp4 - bone morphogenetic protein 4, Cebpb - ccaat/enhancer binding protein (c/ebp), beta, Pawr - prkc, apoptosis, wt1, reg…
GO:0050672	negative regulation of lymphocyte proliferation	1.6e-05	0.00133	4.66	12888	48	634	11	[Cd276 - cd276 antigen, Cd86 - cd86 antigen, H2-Ab1 - histocompatibility 2, class ii antigen a, beta 1, Cd24a - cd24a antigen, Fcgr2b - fc receptor, igg, low affinity iib, H2-Aa - histocompatibility 2, class ii antigen a, alpha, Lgals9 - lectin, galactose binding, soluble 9, Bmp4 - bone morphogenetic protein 4, Cebpb - ccaat/enhancer binding protein (c/ebp), beta, Pawr - prkc, apoptosis, wt1, reg…
GO:1903053	regulation of extracellular matrix organization	1.61e-05	0.00134	5.72	12888	32	634	9	[Antxr1 - anthrax toxin receptor 1, Tnfrsf1b - tumor necrosis factor receptor superfamily, member 1b, Mfi2 - antigen p97 (melanoma associated) identified by monoclonal antibodies 133.2 and 96.5, Tnfrsf1a - tumor necrosis factor receptor superfamily, member 1a, Aebp1 - ae binding protein 1, Phldb1 - pleckstrin homology-like domain, family b, member 1, Ddr2 - discoidin domain receptor family, membe…
GO:0019884	antigen processing and presentation of exogenous antigen	1.68e-05	0.00139	6.5	12888	25	634	8	[Cd74 - cd74 antigen (invariant polypeptide of major histocompatibility complex, class ii antigen-associated), Fcgr3 - fc receptor, igg, low affinity iii, H2-Ab1 - histocompatibility 2, class ii antigen a, beta 1, H2-Aa - histocompatibility 2, class ii antigen a, alpha, Fcgr2b - fc receptor, igg, low affinity iib, Fcer1g - fc receptor, ige, high affinity i, gamma polypeptide, Unc93b1 - unc-93 hom…
GO:0048145	regulation of fibroblast proliferation	1.71e-05	0.0014	3.55	12888	86	634	15	[Sphk1 - sphingosine kinase 1, Fn1 - fibronectin 1, Nupr1 - nuclear protein transcription regulator 1, Sfrp1 - secreted frizzled-related protein 1, Ddr2 - discoidin domain receptor family, member 2, Pdgfra - platelet derived growth factor receptor, alpha polypeptide, Pawr - prkc, apoptosis, wt1, regulator, Myc - myelocytomatosis oncogene, Tgfb1 - transforming growth factor, beta 1, Cd74 - cd74 an…
GO:0051241	negative regulation of multicellular organismal process	1.73e-05	0.00141	1.61	12888	971	634	77	[Cd59a - cd59a antigen, Nfatc2 - nuclear factor of activated t cells, cytoplasmic, calcineurin dependent 2, Jak3 - janus kinase 3, Fas - fas (tnf receptor superfamily member 6), Fn1 - fibronectin 1, Loxl2 - lysyl oxidase-like 2, Il19 - interleukin 19, Lpar1 - lysophosphatidic acid receptor 1, Tlr4 - toll-like receptor 4, Ascl1 - achaete-scute complex homolog 1 (drosophila), Cd74 - cd74 antigen (i…
GO:0001818	negative regulation of cytokine production	1.74e-05	0.00141	2.66	12888	176	634	23	[Cd59a - cd59a antigen, Jak3 - janus kinase 3, Fn1 - fibronectin 1, Lgals9 - lectin, galactose binding, soluble 9, Fcgr2b - fc receptor, igg, low affinity iib, Tnfrsf1a - tumor necrosis factor receptor superfamily, member 1a, Tspo - translocator protein, Tlr4 - toll-like receptor 4, Hfe - hemochromatosis, Tgfb1 - transforming growth factor, beta 1, Fgfr4 - fibroblast growth factor receptor 4, Il1…
GO:0009612	response to mechanical stimulus	1.87e-05	0.00151	3.35	12888	97	634	16	[Pcdh15 - protocadherin 15, Fos - fbj osteosarcoma oncogene, Nos3 - nitric oxide synthase 3, endothelial cell, Tlr4 - toll-like receptor 4, Pawr - prkc, apoptosis, wt1, regulator, Usp53 - ubiquitin specific peptidase 53, Myc - myelocytomatosis oncogene, Cnn2 - calponin 2, Col1a1 - collagen, type i, alpha 1, Thbs1 - thrombospondin 1, Cav1 - caveolin 1, caveolae protein, Gpr98 - g protein-coupled r…
GO:0032760	positive regulation of tumor necrosis factor production	1.9e-05	0.00152	3.94	12888	67	634	13	[Fcgr3 - fc receptor, igg, low affinity iii, Tnfrsf1a - tumor necrosis factor receptor superfamily, member 1a, Lgals9 - lectin, galactose binding, soluble 9, Myd88 - myeloid differentiation primary response gene 88, Tlr4 - toll-like receptor 4, Frmd8 - ferm domain containing 8, Ddx58 - dead (asp-glu-ala-asp) box polypeptide 58, Hspb1 - heat shock protein 1, Fcer1g - fc receptor, ige, high affinit…
GO:1903557	positive regulation of tumor necrosis factor superfamily cytokine production	1.9e-05	0.00151	3.94	12888	67	634	13	[Fcgr3 - fc receptor, igg, low affinity iii, Tnfrsf1a - tumor necrosis factor receptor superfamily, member 1a, Lgals9 - lectin, galactose binding, soluble 9, Myd88 - myeloid differentiation primary response gene 88, Tlr4 - toll-like receptor 4, Frmd8 - ferm domain containing 8, Ddx58 - dead (asp-glu-ala-asp) box polypeptide 58, Hspb1 - heat shock protein 1, Fcer1g - fc receptor, ige, high affinit…
GO:0070664	negative regulation of leukocyte proliferation	1.97e-05	0.00156	4.56	12888	49	634	11	[Cd276 - cd276 antigen, Cd86 - cd86 antigen, H2-Ab1 - histocompatibility 2, class ii antigen a, beta 1, Lgals9 - lectin, galactose binding, soluble 9, H2-Aa - histocompatibility 2, class ii antigen a, alpha, Fcgr2b - fc receptor, igg, low affinity iib, Cd24a - cd24a antigen, Bmp4 - bone morphogenetic protein 4, Cebpb - ccaat/enhancer binding protein (c/ebp), beta, Pawr - prkc, apoptosis, wt1, reg…
GO:0032652	regulation of interleukin-1 production	2.01e-05	0.00158	4.21	12888	58	634	12	[Il1r2 - interleukin 1 receptor, type ii, Hspb1 - heat shock protein 1, Sphk1 - sphingosine kinase 1, Lgals9 - lectin, galactose binding, soluble 9, Malt1 - mucosa associated lymphoid tissue lymphoma translocation gene 1, Cx3cr1 - chemokine (c-x3-c) receptor 1, Tlr4 - toll-like receptor 4, Zc3h12a - zinc finger ccch type containing 12a, S1pr3 - sphingosine-1-phosphate receptor 3, 5730559C18Rik - …
GO:0042130	negative regulation of T cell proliferation	2.17e-05	0.0017	4.96	12888	41	634	10	[Cd276 - cd276 antigen, Cd86 - cd86 antigen, H2-Ab1 - histocompatibility 2, class ii antigen a, beta 1, Cd24a - cd24a antigen, Lgals9 - lectin, galactose binding, soluble 9, H2-Aa - histocompatibility 2, class ii antigen a, alpha, Bmp4 - bone morphogenetic protein 4, Cebpb - ccaat/enhancer binding protein (c/ebp), beta, Pawr - prkc, apoptosis, wt1, regulator, Tgfb1 - transforming growth factor, b…
GO:0000187	activation of MAPK activity	2.7e-05	0.0021	3.6	12888	79	634	14	[Iqgap3 - iq motif containing gtpase activating protein 3, Lpar1 - lysophosphatidic acid receptor 1, Tlr4 - toll-like receptor 4, Zak - sterile alpha motif and leucine zipper containing kinase azk, Itga1 - integrin alpha 1, Tnfsf11 - tumor necrosis factor (ligand) superfamily, member 11, Ret - ret proto-oncogene, 5730559C18Rik - riken cdna 5730559c18 gene, Cd74 - cd74 antigen (invariant polypepti…
GO:0043085	positive regulation of catalytic activity	2.82e-05	0.00219	1.65	12888	839	634	68	[Fas - fas (tnf receptor superfamily member 6), Gsn - gelsolin, Iqgap3 - iq motif containing gtpase activating protein 3, Lpar1 - lysophosphatidic acid receptor 1, Ddr2 - discoidin domain receptor family, member 2, Tlr4 - toll-like receptor 4, Itga1 - integrin alpha 1, St18 - suppression of tumorigenicity 18, Cd74 - cd74 antigen (invariant polypeptide of major histocompatibility complex, class ii…
GO:0002700	regulation of production of molecular mediator of immune response	2.99e-05	0.00231	3.39	12888	90	634	15	[Jak3 - janus kinase 3, Tnfrsf1b - tumor necrosis factor receptor superfamily, member 1b, Fcgr2b - fc receptor, igg, low affinity iib, Malt1 - mucosa associated lymphoid tissue lymphoma translocation gene 1, Tlr4 - toll-like receptor 4, Hfe - hemochromatosis, Ddx58 - dead (asp-glu-ala-asp) box polypeptide 58, Tgfb1 - transforming growth factor, beta 1, Parp3 - poly (adp-ribose) polymerase family,…
GO:0015721	bile acid and bile salt transport	3.03e-05	0.00232	11.29	12888	9	634	5	[Slc10a6 - solute carrier family 10 (sodium/bile acid cotransporter family), member 6, Aqp9 - aquaporin 9, Abcc3 - atp-binding cassette, sub-family c (cftr/mrp), member 3, Slco1a5 - solute carrier organic anion transporter family, member 1a5, Slco1a4 - solute carrier organic anion transporter family, member 1a4]
GO:0038063	collagen-activated tyrosine kinase receptor signaling pathway	3.03e-05	0.00231	11.29	12888	9	634	5	[Col1a1 - collagen, type i, alpha 1, Ddr2 - discoidin domain receptor family, member 2, Col4a6 - collagen, type iv, alpha 6, Ddr1 - discoidin domain receptor family, member 1, Col4a5 - collagen, type iv, alpha 5]
GO:0050764	regulation of phagocytosis	3.1e-05	0.00236	3.78	12888	70	634	13	[Sphk1 - sphingosine kinase 1, Ano6 - anoctamin 6, Dysf - dysferlin, Fcgr3 - fc receptor, igg, low affinity iii, Fcgr2b - fc receptor, igg, low affinity iib, Rab31 - rab31, member ras oncogene family, Dock2 - dedicator of cyto-kinesis 2, Tgfb1 - transforming growth factor, beta 1, Cnn2 - calponin 2, Ptx3 - pentraxin related gene, Fcer1g - fc receptor, ige, high affinity i, gamma polypeptide, Pros…
GO:0042552	myelination	3.12e-05	0.00236	3.56	12888	80	634	14	[Bcas1 - breast carcinoma amplified sequence 1, Mbp - myelin basic protein, Pllp - plasma membrane proteolipid, Mal - myelin and lymphocyte protein, t cell differentiation protein, Gpr126 - g protein-coupled receptor 126, Nfasc - neurofascin, Plp1 - proteolipid protein (myelin) 1, Sox10 - sry-box containing gene 10, Tgfb1 - transforming growth factor, beta 1, Ugt8a - udp galactosyltransferase 8a,…
GO:0030593	neutrophil chemotaxis	3.17e-05	0.00238	6.02	12888	27	634	8	[Itga9 - integrin alpha 9, Cxcl5 - chemokine (c-x-c motif) ligand 5, Fcgr3 - fc receptor, igg, low affinity iii, Fcer1g - fc receptor, ige, high affinity i, gamma polypeptide, Cxcl9 - chemokine (c-x-c motif) ligand 9, Itga1 - integrin alpha 1, Ccl7 - chemokine (c-c motif) ligand 7, Itgb2 - integrin beta 2]
GO:0002757	immune response-activating signal transduction	3.17e-05	0.00237	3.09	12888	112	634	17	[Nfatc2 - nuclear factor of activated t cells, cytoplasmic, calcineurin dependent 2, Mog - myelin oligodendrocyte glycoprotein, Fcgr2b - fc receptor, igg, low affinity iib, Lgals9 - lectin, galactose binding, soluble 9, Malt1 - mucosa associated lymphoid tissue lymphoma translocation gene 1, Myd88 - myeloid differentiation primary response gene 88, Tlr4 - toll-like receptor 4, Unc93b1 - unc-93 ho…
GO:1903034	regulation of response to wounding	3.46e-05	0.00257	2.95	12888	124	634	18	[Serpinf2 - serine (or cysteine) peptidase inhibitor, clade f, member 2, Ano6 - anoctamin 6, Pdgfra - platelet derived growth factor receptor, alpha polypeptide, Tlr4 - toll-like receptor 4, Serping1 - serine (or cysteine) peptidase inhibitor, clade g, member 1, Plek - pleckstrin, Tnfrsf12a - tumor necrosis factor receptor superfamily, member 12a, Mylk - myosin, light polypeptide kinase, Cd24a - …
GO:0032268	regulation of cellular protein metabolic process	3.65e-05	0.0027	1.39	12888	1901	634	130	[Fas - fas (tnf receptor superfamily member 6), Gsn - gelsolin, Ddr2 - discoidin domain receptor family, member 2, Hspb1 - heat shock protein 1, Socs3 - suppressor of cytokine signaling 3, Nox4 - nadph oxidase 4, Pbk - pdz binding kinase, Kirrel - kin of irre like (drosophila), Ezh2 - enhancer of zeste homolog 2 (drosophila), Mbp - myelin basic protein, Pdgfra - platelet derived growth factor rec…
GO:0022409	positive regulation of cell-cell adhesion	3.74e-05	0.00275	2.75	12888	148	634	20	[Jak3 - janus kinase 3, Lgals1 - lectin, galactose binding, soluble 1, H2-Ab1 - histocompatibility 2, class ii antigen a, beta 1, Lgals9 - lectin, galactose binding, soluble 9, H2-Aa - histocompatibility 2, class ii antigen a, alpha, Irf1 - interferon regulatory factor 1, Malt1 - mucosa associated lymphoid tissue lymphoma translocation gene 1, Pawr - prkc, apoptosis, wt1, regulator, Tnfsf11 - tum…
GO:0051251	positive regulation of lymphocyte activation	3.75e-05	0.00274	2.67	12888	160	634	21	[Jak3 - janus kinase 3, Nfatc2 - nuclear factor of activated t cells, cytoplasmic, calcineurin dependent 2, Lgals1 - lectin, galactose binding, soluble 1, H2-Ab1 - histocompatibility 2, class ii antigen a, beta 1, H2-Aa - histocompatibility 2, class ii antigen a, alpha, Lgals9 - lectin, galactose binding, soluble 9, Irf1 - interferon regulatory factor 1, Malt1 - mucosa associated lymphoid tissue …
GO:0071902	positive regulation of protein serine/threonine kinase activity	3.84e-05	0.0028	2.37	12888	223	634	26	[Iqgap3 - iq motif containing gtpase activating protein 3, Tlr4 - toll-like receptor 4, Lpar1 - lysophosphatidic acid receptor 1, Zak - sterile alpha motif and leucine zipper containing kinase azk, Itga1 - integrin alpha 1, Tgfb1 - transforming growth factor, beta 1, Ret - ret proto-oncogene, Cd74 - cd74 antigen (invariant polypeptide of major histocompatibility complex, class ii antigen-associat…
GO:0060326	cell chemotaxis	4.03e-05	0.00292	3.16	12888	103	634	16	[Itga9 - integrin alpha 9, Ano6 - anoctamin 6, Fcgr3 - fc receptor, igg, low affinity iii, Pdgfra - platelet derived growth factor receptor, alpha polypeptide, Lpar1 - lysophosphatidic acid receptor 1, Cxcl9 - chemokine (c-x-c motif) ligand 9, Itga1 - integrin alpha 1, Tnfsf11 - tumor necrosis factor (ligand) superfamily, member 11, Itgb2 - integrin beta 2, Plxnb3 - plexin b3, Cxcl5 - chemokine (…
GO:0030595	leukocyte chemotaxis	4.07e-05	0.00293	3.93	12888	62	634	12	[Itga9 - integrin alpha 9, Cxcl5 - chemokine (c-x-c motif) ligand 5, Ano6 - anoctamin 6, Fcgr3 - fc receptor, igg, low affinity iii, Fcer1g - fc receptor, ige, high affinity i, gamma polypeptide, Cx3cr1 - chemokine (c-x3-c) receptor 1, Tnfsf11 - tumor necrosis factor (ligand) superfamily, member 11, Itga1 - integrin alpha 1, Cxcl9 - chemokine (c-x-c motif) ligand 9, Ccl7 - chemokine (c-c motif) l…
GO:0032496	response to lipopolysaccharide	4.12e-05	0.00296	2.73	12888	149	634	20	[Sbno2 - strawberry notch homolog 2 (drosophila), Ptgfr - prostaglandin f receptor, Tnfrsf1b - tumor necrosis factor receptor superfamily, member 1b, Lgals9 - lectin, galactose binding, soluble 9, Myd88 - myeloid differentiation primary response gene 88, Nos3 - nitric oxide synthase 3, endothelial cell, Plscr2 - phospholipid scramblase 2, Tlr4 - toll-like receptor 4, Vdr - vitamin d receptor, Cxc…
GO:0002697	regulation of immune effector process	4.13e-05	0.00295	2.32	12888	237	634	27	[Cd59a - cd59a antigen, Jak3 - janus kinase 3, Tlr4 - toll-like receptor 4, Pvr - poliovirus receptor, Ddx58 - dead (asp-glu-ala-asp) box polypeptide 58, Tgfb1 - transforming growth factor, beta 1, Parp3 - poly (adp-ribose) polymerase family, member 3, Cd37 - cd37 antigen, Cd74 - cd74 antigen (invariant polypeptide of major histocompatibility complex, class ii antigen-associated), Cxcl5 - chemoki…
GO:0065009	regulation of molecular function	4.23e-05	0.00301	1.39	12888	1907	634	130	[Fas - fas (tnf receptor superfamily member 6), Ptgis - prostaglandin i2 (prostacyclin) synthase, Gsn - gelsolin, Ddr2 - discoidin domain receptor family, member 2, Oas1a - 2'-5' oligoadenylate synthetase 1a, Ahnak - ahnak nucleoprotein (desmoyokin), Ddx58 - dead (asp-glu-ala-asp) box polypeptide 58, Hspb1 - heat shock protein 1, Sh3bp4 - sh3-domain binding protein 4, Nox4 - nadph oxidase 4, Cnn3…
GO:0034341	response to interferon-gamma	4.24e-05	0.003	3.67	12888	72	634	13	[Gbp7 - guanylate binding protein 7, H2-Ab1 - histocompatibility 2, class ii antigen a, beta 1, H2-Aa - histocompatibility 2, class ii antigen a, alpha, Gsn - gelsolin, Tlr4 - toll-like receptor 4, Gbp3 - guanylate binding protein 3, Gbp2 - guanylate binding protein 2, H2-Eb1 - histocompatibility 2, class ii antigen e beta, Gbp9 - guanylate-binding protein 9, Ifitm6 - interferon induced transmemb…
GO:0046425	regulation of JAK-STAT cascade	4.24e-05	0.00298	3.67	12888	72	634	13	[Ctf1 - cardiotrophin 1, Tnfrsf1a - tumor necrosis factor receptor superfamily, member 1a, Cyp1b1 - cytochrome p450, family 1, subfamily b, polypeptide 1, Irf1 - interferon regulatory factor 1, Ret - ret proto-oncogene, Hpx - hemopexin, Lif - leukemia inhibitory factor, Cxcl5 - chemokine (c-x-c motif) ligand 5, Csf1r - colony stimulating factor 1 receptor, Socs3 - suppressor of cytokine signaling…
GO:0032653	regulation of interleukin-10 production	4.24e-05	0.00297	5.81	12888	28	634	8	[Jak3 - janus kinase 3, Fcgr2b - fc receptor, igg, low affinity iib, Lgals9 - lectin, galactose binding, soluble 9, Fcer1g - fc receptor, ige, high affinity i, gamma polypeptide, Tlr4 - toll-like receptor 4, Bcl3 - b cell leukemia/lymphoma 3, 5730559C18Rik - riken cdna 5730559c18 gene, Ager - advanced glycosylation end product-specific receptor]
GO:0050731	positive regulation of peptidyl-tyrosine phosphorylation	4.48e-05	0.00312	2.8	12888	138	634	19	[Ctf1 - cardiotrophin 1, Tnfrsf1a - tumor necrosis factor receptor superfamily, member 1a, Pdgfra - platelet derived growth factor receptor, alpha polypeptide, Tlr4 - toll-like receptor 4, Efna1 - ephrin a1, Tgfb1 - transforming growth factor, beta 1, Hpx - hemopexin, Gfra1 - glial cell line derived neurotrophic factor family receptor alpha 1, Cd74 - cd74 antigen (invariant polypeptide of major h…
GO:0042535	positive regulation of tumor necrosis factor biosynthetic process	4.73e-05	0.00328	8.13	12888	15	634	6	[Hspb1 - heat shock protein 1, Fcgr3 - fc receptor, igg, low affinity iii, Thbs1 - thrombospondin 1, Tlr4 - toll-like receptor 4, Ager - advanced glycosylation end product-specific receptor, Akap12 - a kinase (prka) anchor protein (gravin) 12]
GO:0010952	positive regulation of peptidase activity	4.79e-05	0.00331	2.88	12888	127	634	18	[Fas - fas (tnf receptor superfamily member 6), Mbp - myelin basic protein, Uaca - uveal autoantigen with coiled-coil domains and ankyrin repeats, Malt1 - mucosa associated lymphoid tissue lymphoma translocation gene 1, Gsn - gelsolin, Casp12 - caspase 12, Pawr - prkc, apoptosis, wt1, regulator, Dap - death-associated protein, Myc - myelocytomatosis oncogene, Efna1 - ephrin a1, Ret - ret proto-on…
GO:0045597	positive regulation of cell differentiation	4.89e-05	0.00336	1.61	12888	870	634	69	[Nfatc2 - nuclear factor of activated t cells, cytoplasmic, calcineurin dependent 2, Cd53 - cd53 antigen, Sphk1 - sphingosine kinase 1, Fn1 - fibronectin 1, Fos - fbj osteosarcoma oncogene, Loxl2 - lysyl oxidase-like 2, Clic1 - chloride intracellular channel 1, Lpar1 - lysophosphatidic acid receptor 1, Ddr2 - discoidin domain receptor family, member 2, Ascl1 - achaete-scute complex homolog 1 (dro…
GO:0002764	immune response-regulating signaling pathway	5.02e-05	0.00343	2.98	12888	116	634	17	[Nfatc2 - nuclear factor of activated t cells, cytoplasmic, calcineurin dependent 2, Mog - myelin oligodendrocyte glycoprotein, Fcgr2b - fc receptor, igg, low affinity iib, Lgals9 - lectin, galactose binding, soluble 9, Malt1 - mucosa associated lymphoid tissue lymphoma translocation gene 1, Myd88 - myeloid differentiation primary response gene 88, Tlr4 - toll-like receptor 4, Unc93b1 - unc-93 ho…
GO:0021782	glial cell development	5.18e-05	0.00352	4.14	12888	54	634	11	[Sox4 - sry-box containing gene 4, Nrros - negative regulator of reactive oxygen species, Tlr4 - toll-like receptor 4, Myrf - myelin regulatory factor, Plp1 - proteolipid protein (myelin) 1, Zfp488 - zinc finger protein 488, Ascl1 - achaete-scute complex homolog 1 (drosophila), Tspan2 - tetraspanin 2, Sox10 - sry-box containing gene 10, Tgfb1 - transforming growth factor, beta 1, Ager - advanced …
GO:0008283	cell proliferation	5.24e-05	0.00355	1.97	12888	393	634	38	[Mki67 - antigen identified by monoclonal antibody ki 67, Loxl2 - lysyl oxidase-like 2, Fam83d - family with sequence similarity 83, member d, Ddr2 - discoidin domain receptor family, member 2, Tlr4 - toll-like receptor 4, Tgfbi - transforming growth factor, beta induced, Ctps - cytidine 5'-triphosphate synthase, Ascl1 - achaete-scute complex homolog 1 (drosophila), Tgfb1 - transforming growth fa…
GO:0022407	regulation of cell-cell adhesion	5.41e-05	0.00365	2.24	12888	254	634	28	[Jak3 - janus kinase 3, Pawr - prkc, apoptosis, wt1, regulator, Epcam - epithelial cell adhesion molecule, Tgfb1 - transforming growth factor, beta 1, Cd74 - cd74 antigen (invariant polypeptide of major histocompatibility complex, class ii antigen-associated), Cd86 - cd86 antigen, Cd276 - cd276 antigen, Bmp4 - bone morphogenetic protein 4, Cebpb - ccaat/enhancer binding protein (c/ebp), beta, Zc3…
GO:0050729	positive regulation of inflammatory response	5.48e-05	0.00368	3.39	12888	84	634	14	[Nupr1 - nuclear protein transcription regulator 1, Fcgr3 - fc receptor, igg, low affinity iii, Tnfrsf1a - tumor necrosis factor receptor superfamily, member 1a, Cebpa - ccaat/enhancer binding protein (c/ebp), alpha, Ctsc - cathepsin c, Myd88 - myeloid differentiation primary response gene 88, Tlr4 - toll-like receptor 4, Tnfsf11 - tumor necrosis factor (ligand) superfamily, member 11, Tgm2 - tra…
GO:0019882	antigen processing and presentation	5.65e-05	0.00378	3.81	12888	64	634	12	[Cd74 - cd74 antigen (invariant polypeptide of major histocompatibility complex, class ii antigen-associated), H2-Ab1 - histocompatibility 2, class ii antigen a, beta 1, Fcgr3 - fc receptor, igg, low affinity iii, Fcgr2b - fc receptor, igg, low affinity iib, H2-Aa - histocompatibility 2, class ii antigen a, alpha, Fcer1g - fc receptor, ige, high affinity i, gamma polypeptide, Hfe - hemochromatosi…
GO:0009888	tissue development	5.67e-05	0.00377	1.88	12888	453	634	42	[Dysf - dysferlin, Vcan - versican, Ptgis - prostaglandin i2 (prostacyclin) synthase, Ddr2 - discoidin domain receptor family, member 2, Pgm5 - phosphoglucomutase 5, Pth1r - parathyroid hormone 1 receptor, Itga8 - integrin alpha 8, Epcam - epithelial cell adhesion molecule, Ascl1 - achaete-scute complex homolog 1 (drosophila), Ret - ret proto-oncogene, Tgfb1 - transforming growth factor, beta 1, …
GO:1900745	positive regulation of p38MAPK cascade	6.02e-05	0.00398	6.47	12888	22	634	7	[Sphk1 - sphingosine kinase 1, Gadd45b - growth arrest and dna-damage-inducible 45 beta, Gadd45a - growth arrest and dna-damage-inducible 45 alpha, Met - met proto-oncogene, Zc3h12a - zinc finger ccch type containing 12a, Ager - advanced glycosylation end product-specific receptor, Gadd45g - growth arrest and dna-damage-inducible 45 gamma]
GO:0007167	enzyme linked receptor protein signaling pathway	6.17e-05	0.00407	1.95	12888	396	634	38	[Jak3 - janus kinase 3, Gucy2f - guanylate cyclase 2f, Ctf1 - cardiotrophin 1, Fos - fbj osteosarcoma oncogene, Ddr2 - discoidin domain receptor family, member 2, Efna1 - ephrin a1, Ret - ret proto-oncogene, Tgfb1 - transforming growth factor, beta 1, Fgfr4 - fibroblast growth factor receptor 4, Col4a5 - collagen, type iv, alpha 5, Sh2d6 - sh2 domain containing 6, Csf1r - colony stimulating facto…
GO:0002683	negative regulation of immune system process	6.31e-05	0.00413	2.09	12888	311	634	32	[Gpr17 - g protein-coupled receptor 17, Cd59a - cd59a antigen, Jak3 - janus kinase 3, Fas - fas (tnf receptor superfamily member 6), Tmem176b - transmembrane protein 176b, Pawr - prkc, apoptosis, wt1, regulator, Tgfb1 - transforming growth factor, beta 1, Parp3 - poly (adp-ribose) polymerase family, member 3, Cd37 - cd37 antigen, Cd74 - cd74 antigen (invariant polypeptide of major histocompatibil…
GO:0032651	regulation of interleukin-1 beta production	6.31e-05	0.00412	4.42	12888	46	634	10	[Hspb1 - heat shock protein 1, Sphk1 - sphingosine kinase 1, Malt1 - mucosa associated lymphoid tissue lymphoma translocation gene 1, Cx3cr1 - chemokine (c-x3-c) receptor 1, Tlr4 - toll-like receptor 4, Zc3h12a - zinc finger ccch type containing 12a, S1pr3 - sphingosine-1-phosphate receptor 3, 5730559C18Rik - riken cdna 5730559c18 gene, Ager - advanced glycosylation end product-specific receptor,…
GO:0071219	cellular response to molecule of bacterial origin	6.5e-05	0.00423	3.18	12888	96	634	15	[Sbno2 - strawberry notch homolog 2 (drosophila), Tnfrsf1b - tumor necrosis factor receptor superfamily, member 1b, Fcgr2b - fc receptor, igg, low affinity iib, Myd88 - myeloid differentiation primary response gene 88, Tlr4 - toll-like receptor 4, Plscr2 - phospholipid scramblase 2, Vdr - vitamin d receptor, Cxcl9 - chemokine (c-x-c motif) ligand 9, Gbp2 - guanylate binding protein 2, Cxcl5 - che…
GO:1901700	response to oxygen-containing compound	6.9e-05	0.00447	1.61	12888	831	634	66	[Ptgfr - prostaglandin f receptor, Sphk1 - sphingosine kinase 1, Fos - fbj osteosarcoma oncogene, Lpar1 - lysophosphatidic acid receptor 1, Tlr4 - toll-like receptor 4, Cxcl9 - chemokine (c-x-c motif) ligand 9, Cd86 - cd86 antigen, Serpina3m - serine (or cysteine) peptidase inhibitor, clade a, member 3m, Pde3a - phosphodiesterase 3a, cgmp inhibited, Sh3bp4 - sh3-domain binding protein 4, Nox4 - n…
GO:0048002	antigen processing and presentation of peptide antigen	7.19e-05	0.00463	4.81	12888	38	634	9	[Cd74 - cd74 antigen (invariant polypeptide of major histocompatibility complex, class ii antigen-associated), H2-Ab1 - histocompatibility 2, class ii antigen a, beta 1, Fcgr3 - fc receptor, igg, low affinity iii, H2-Aa - histocompatibility 2, class ii antigen a, alpha, Fcgr2b - fc receptor, igg, low affinity iib, Fcer1g - fc receptor, ige, high affinity i, gamma polypeptide, Hfe - hemochromatosi…
GO:0042104	positive regulation of activated T cell proliferation	7.25e-05	0.00465	7.62	12888	16	634	6	[Tnfsf9 - tumor necrosis factor (ligand) superfamily, member 9, Jak3 - janus kinase 3, Cd86 - cd86 antigen, Cd24a - cd24a antigen, Igfbp2 - insulin-like growth factor binding protein 2, Ager - advanced glycosylation end product-specific receptor]
GO:0060536	cartilage morphogenesis	7.25e-05	0.00463	7.62	12888	16	634	6	[Col12a1 - collagen, type xii, alpha 1, Col20a1 - collagen, type xx, alpha 1, Vwa1 - von willebrand factor a domain containing 1, Col6a2 - collagen, type vi, alpha 2, Col6a1 - collagen, type vi, alpha 1, Matn4 - matrilin 4]
GO:0032642	regulation of chemokine production	7.36e-05	0.00468	3.99	12888	56	634	11	[Cd74 - cd74 antigen (invariant polypeptide of major histocompatibility complex, class ii antigen-associated), Csf1r - colony stimulating factor 1 receptor, Cxcl5 - chemokine (c-x-c motif) ligand 5, Tlr7 - toll-like receptor 7, Mbp - myelin basic protein, Lgals9 - lectin, galactose binding, soluble 9, Cd24a - cd24a antigen, Myd88 - myeloid differentiation primary response gene 88, Epha2 - eph rec…
GO:1904892	regulation of STAT cascade	7.62e-05	0.00482	3.48	12888	76	634	13	[Ctf1 - cardiotrophin 1, Tnfrsf1a - tumor necrosis factor receptor superfamily, member 1a, Cyp1b1 - cytochrome p450, family 1, subfamily b, polypeptide 1, Irf1 - interferon regulatory factor 1, Ret - ret proto-oncogene, Hpx - hemopexin, Lif - leukemia inhibitory factor, Csf1r - colony stimulating factor 1 receptor, Cxcl5 - chemokine (c-x-c motif) ligand 5, Socs3 - suppressor of cytokine signaling…
GO:2001198	regulation of dendritic cell differentiation	8.04e-05	0.00507	13.55	12888	6	634	4	[Tmem176b - transmembrane protein 176b, Cebpb - ccaat/enhancer binding protein (c/ebp), beta, Tmem176a - transmembrane protein 176a, Ager - advanced glycosylation end product-specific receptor]
GO:0031100	animal organ regeneration	8.28e-05	0.0052	6.19	12888	23	634	7	[Lif - leukemia inhibitory factor, Cxcl5 - chemokine (c-x-c motif) ligand 5, Ezh2 - enhancer of zeste homolog 2 (drosophila), Cebpb - ccaat/enhancer binding protein (c/ebp), beta, Cdk1 - cyclin-dependent kinase 1, Ccnd1 - cyclin d1, Tgfb1 - transforming growth factor, beta 1]
GO:0051247	positive regulation of protein metabolic process	8.57e-05	0.00536	1.47	12888	1288	634	93	[Fas - fas (tnf receptor superfamily member 6), Sphk1 - sphingosine kinase 1, Iqgap3 - iq motif containing gtpase activating protein 3, Gsn - gelsolin, Lpar1 - lysophosphatidic acid receptor 1, Tlr4 - toll-like receptor 4, Ddr2 - discoidin domain receptor family, member 2, Itga1 - integrin alpha 1, St18 - suppression of tumorigenicity 18, Cd74 - cd74 antigen (invariant polypeptide of major histoc…
GO:0050878	regulation of body fluid levels	9.18e-05	0.00571	2.51	12888	170	634	21	[Serpinf2 - serine (or cysteine) peptidase inhibitor, clade f, member 2, Ano6 - anoctamin 6, Pdgfra - platelet derived growth factor receptor, alpha polypeptide, Tlr4 - toll-like receptor 4, Serping1 - serine (or cysteine) peptidase inhibitor, clade g, member 1, Vdr - vitamin d receptor, Plek - pleckstrin, Serpind1 - serine (or cysteine) peptidase inhibitor, clade d, member 1, Avp - arginine vaso…
GO:0071222	cellular response to lipopolysaccharide	9.26e-05	0.00574	3.23	12888	88	634	14	[Sbno2 - strawberry notch homolog 2 (drosophila), Tnfrsf1b - tumor necrosis factor receptor superfamily, member 1b, Myd88 - myeloid differentiation primary response gene 88, Tlr4 - toll-like receptor 4, Plscr2 - phospholipid scramblase 2, Vdr - vitamin d receptor, Cxcl9 - chemokine (c-x-c motif) ligand 9, Gbp2 - guanylate binding protein 2, Cxcl5 - chemokine (c-x-c motif) ligand 5, Cd86 - cd86 an…
GO:0002221	pattern recognition receptor signaling pathway	9.26e-05	0.00571	4.24	12888	48	634	10	[Tlr7 - toll-like receptor 7, Cd86 - cd86 antigen, Lgals9 - lectin, galactose binding, soluble 9, Myd88 - myeloid differentiation primary response gene 88, Tlr4 - toll-like receptor 4, Tlr13 - toll-like receptor 13, Unc93b1 - unc-93 homolog b1 (c. elegans), Ddx58 - dead (asp-glu-ala-asp) box polypeptide 58, Cd14 - cd14 antigen, 5730559C18Rik - riken cdna 5730559c18 gene]
GO:0002443	leukocyte mediated immunity	9.26e-05	0.00569	4.24	12888	48	634	10	[Cd74 - cd74 antigen (invariant polypeptide of major histocompatibility complex, class ii antigen-associated), Fas - fas (tnf receptor superfamily member 6), Fcgr3 - fc receptor, igg, low affinity iii, H2-Ab1 - histocompatibility 2, class ii antigen a, beta 1, Fcgr2b - fc receptor, igg, low affinity iib, Fcer1g - fc receptor, ige, high affinity i, gamma polypeptide, Myd88 - myeloid differentiatio…
GO:0002758	innate immune response-activating signal transduction	9.26e-05	0.00566	4.24	12888	48	634	10	[Tlr7 - toll-like receptor 7, Cd86 - cd86 antigen, Lgals9 - lectin, galactose binding, soluble 9, Myd88 - myeloid differentiation primary response gene 88, Tlr4 - toll-like receptor 4, Tlr13 - toll-like receptor 13, Unc93b1 - unc-93 homolog b1 (c. elegans), Ddx58 - dead (asp-glu-ala-asp) box polypeptide 58, Cd14 - cd14 antigen, 5730559C18Rik - riken cdna 5730559c18 gene]
GO:1990266	neutrophil migration	9.45e-05	0.00575	5.25	12888	31	634	8	[Itga9 - integrin alpha 9, Cxcl5 - chemokine (c-x-c motif) ligand 5, Fcgr3 - fc receptor, igg, low affinity iii, Fcer1g - fc receptor, ige, high affinity i, gamma polypeptide, Itga1 - integrin alpha 1, Cxcl9 - chemokine (c-x-c motif) ligand 9, Ccl7 - chemokine (c-c motif) ligand 7, Itgb2 - integrin beta 2]
GO:0032147	activation of protein kinase activity	9.61e-05	0.00583	2.39	12888	196	634	23	[Gadd45b - growth arrest and dna-damage-inducible 45 beta, Malt1 - mucosa associated lymphoid tissue lymphoma translocation gene 1, Iqgap3 - iq motif containing gtpase activating protein 3, Lpar1 - lysophosphatidic acid receptor 1, Tlr4 - toll-like receptor 4, Zak - sterile alpha motif and leucine zipper containing kinase azk, Itga1 - integrin alpha 1, Tnfsf11 - tumor necrosis factor (ligand) sup…
GO:0045595	regulation of cell differentiation	9.99e-05	0.00603	1.43	12888	1466	634	103	[Fas - fas (tnf receptor superfamily member 6), Ddr2 - discoidin domain receptor family, member 2, Ascl1 - achaete-scute complex homolog 1 (drosophila), Tmsb4x - thymosin, beta 4, x chromosome, Igsf10 - immunoglobulin superfamily, member 10, Hspb1 - heat shock protein 1, Pde3a - phosphodiesterase 3a, cgmp inhibited, Socs3 - suppressor of cytokine signaling 3, Mag - myelin-associated glycoprotein,…
GO:0009653	anatomical structure morphogenesis	0.000102	0.00615	1.5	12888	1141	634	84	[Col20a1 - collagen, type xx, alpha 1, Fn1 - fibronectin 1, Nes - nestin, Unc93b1 - unc-93 homolog b1 (c. elegans), Itga1 - integrin alpha 1, Cdh24 - cadherin-like 24, Lif - leukemia inhibitory factor, Socs3 - suppressor of cytokine signaling 3, Ugt8a - udp galactosyltransferase 8a, Ugdh - udp-glucose dehydrogenase, Cdsn - corneodesmosin, Nox4 - nadph oxidase 4, Flnb - filamin, beta, Prrx2 - pair…
GO:0038065	collagen-activated signaling pathway	0.000102	0.00612	9.24	12888	11	634	5	[Col1a1 - collagen, type i, alpha 1, Ddr2 - discoidin domain receptor family, member 2, Col4a6 - collagen, type iv, alpha 6, Ddr1 - discoidin domain receptor family, member 1, Col4a5 - collagen, type iv, alpha 5]
GO:0070167	regulation of biomineral tissue development	0.000105	0.00624	3.59	12888	68	634	12	[Cd276 - cd276 antigen, Fam101a - family with sequence similarity 101, member a, Ano6 - anoctamin 6, Omd - osteomodulin, Mgp - matrix gla protein, Cyr61 - cysteine rich protein 61, Bmp4 - bone morphogenetic protein 4, Nos3 - nitric oxide synthase 3, endothelial cell, Ddr2 - discoidin domain receptor family, member 2, Cebpb - ccaat/enhancer binding protein (c/ebp), beta, Gpr98 - g protein-coupled …
GO:0002706	regulation of lymphocyte mediated immunity	0.000105	0.00624	3.2	12888	89	634	14	[Tnfrsf1b - tumor necrosis factor receptor superfamily, member 1b, Fcgr3 - fc receptor, igg, low affinity iii, Lgals9 - lectin, galactose binding, soluble 9, Fcgr2b - fc receptor, igg, low affinity iib, Malt1 - mucosa associated lymphoid tissue lymphoma translocation gene 1, Hfe - hemochromatosis, Pvr - poliovirus receptor, Tgfb1 - transforming growth factor, beta 1, Parp3 - poly (adp-ribose) pol…
GO:0001810	regulation of type I hypersensitivity	0.000119	0.00701	20.33	12888	3	634	3	[Fcgr3 - fc receptor, igg, low affinity iii, Fcgr2b - fc receptor, igg, low affinity iib, Fcer1g - fc receptor, ige, high affinity i, gamma polypeptide]
GO:0014028	notochord formation	0.000119	0.00698	20.33	12888	3	634	3	[Epha2 - eph receptor a2, Efna1 - ephrin a1, Crb2 - crumbs homolog 2 (drosophila)]
GO:0070372	regulation of ERK1 and ERK2 cascade	0.00012	0.00706	2.3	12888	212	634	24	[Glipr2 - gli pathogenesis-related 2, Serpinf2 - serine (or cysteine) peptidase inhibitor, clade f, member 2, Fn1 - fibronectin 1, Fam83d - family with sequence similarity 83, member d, Pdgfra - platelet derived growth factor receptor, alpha polypeptide, Tlr4 - toll-like receptor 4, Pla2g5 - phospholipase a2, group v, Tnfsf11 - tumor necrosis factor (ligand) superfamily, member 11, Tgfb1 - transf…
GO:0032270	positive regulation of cellular protein metabolic process	0.000122	0.00715	1.48	12888	1198	634	87	[Fas - fas (tnf receptor superfamily member 6), Sphk1 - sphingosine kinase 1, Iqgap3 - iq motif containing gtpase activating protein 3, Gsn - gelsolin, Lpar1 - lysophosphatidic acid receptor 1, Tlr4 - toll-like receptor 4, Ddr2 - discoidin domain receptor family, member 2, Itga1 - integrin alpha 1, St18 - suppression of tumorigenicity 18, Cd74 - cd74 antigen (invariant polypeptide of major histoc…
GO:0042110	T cell activation	0.00013	0.00759	2.67	12888	137	634	18	[Apbb1ip - amyloid beta (a4) precursor protein-binding, family b, member 1 interacting protein, Irf1 - interferon regulatory factor 1, Malt1 - mucosa associated lymphoid tissue lymphoma translocation gene 1, Dock2 - dedicator of cyto-kinesis 2, Ctps - cytidine 5'-triphosphate synthase, Tmem98 - transmembrane protein 98, Tgfb1 - transforming growth factor, beta 1, Itgb2 - integrin beta 2, Cd276 - …
GO:0050982	detection of mechanical stimulus	0.000135	0.00785	4.46	12888	41	634	9	[Pcdh15 - protocadherin 15, Tlr4 - toll-like receptor 4, Pawr - prkc, apoptosis, wt1, regulator, Myc - myelocytomatosis oncogene, Gpr98 - g protein-coupled receptor 98, Piezo1 - piezo-type mechanosensitive ion channel component 1, Slc12a2 - solute carrier family 12, member 2, Col11a1 - collagen, type xi, alpha 1, Piezo2 - piezo-type mechanosensitive ion channel component 2]
GO:0030154	cell differentiation	0.000138	0.00799	1.42	12888	1461	634	102	[Rbm46 - rna binding motif protein 46, Pth1r - parathyroid hormone 1 receptor, Ascl1 - achaete-scute complex homolog 1 (drosophila), Socs3 - suppressor of cytokine signaling 3, Fcer1g - fc receptor, ige, high affinity i, gamma polypeptide, Nox4 - nadph oxidase 4, Flnb - filamin, beta, Creb5 - camp responsive element binding protein 5, Slc2a4 - solute carrier family 2 (facilitated glucose transpor…
GO:0001525	angiogenesis	0.000139	0.00801	2.28	12888	214	634	24	[Dysf - dysferlin, Fn1 - fibronectin 1, Loxl2 - lysyl oxidase-like 2, Cyp1b1 - cytochrome p450, family 1, subfamily b, polypeptide 1, Col18a1 - collagen, type xviii, alpha 1, Arhgap22 - rho gtpase activating protein 22, Nos3 - nitric oxide synthase 3, endothelial cell, Pdgfra - platelet derived growth factor receptor, alpha polypeptide, Efna1 - ephrin a1, Hspg2 - perlecan (heparan sulfate proteog…
GO:0010717	regulation of epithelial to mesenchymal transition	0.00014	0.00801	3.48	12888	70	634	12	[Glipr2 - gli pathogenesis-related 2, Ezh2 - enhancer of zeste homolog 2 (drosophila), Loxl2 - lysyl oxidase-like 2, Sfrp1 - secreted frizzled-related protein 1, Col1a1 - collagen, type i, alpha 1, Bmp4 - bone morphogenetic protein 4, Phldb1 - pleckstrin homology-like domain, family b, member 1, Pawr - prkc, apoptosis, wt1, regulator, Efna1 - ephrin a1, Tgfb1 - transforming growth factor, beta 1,…
GO:0031348	negative regulation of defense response	0.00014	0.008	2.57	12888	150	634	19	[Gpr17 - g protein-coupled receptor 17, Tnfrsf1b - tumor necrosis factor receptor superfamily, member 1b, Lgals9 - lectin, galactose binding, soluble 9, Fcgr2b - fc receptor, igg, low affinity iib, Ptgis - prostaglandin i2 (prostacyclin) synthase, Tnfrsf1a - tumor necrosis factor receptor superfamily, member 1a, Uaca - uveal autoantigen with coiled-coil domains and ankyrin repeats, Serping1 - ser…
GO:1901568	fatty acid derivative metabolic process	0.000142	0.00805	3.73	12888	60	634	11	[Cd74 - cd74 antigen (invariant polypeptide of major histocompatibility complex, class ii antigen-associated), Sphk1 - sphingosine kinase 1, Akr1c13 - aldo-keto reductase family 1, member c13, Cyp1b1 - cytochrome p450, family 1, subfamily b, polypeptide 1, Tnfrsf1a - tumor necrosis factor receptor superfamily, member 1a, Ptgis - prostaglandin i2 (prostacyclin) synthase, Ggt5 - gamma-glutamyltrans…
GO:0002275	myeloid cell activation involved in immune response	0.000149	0.00844	5.69	12888	25	634	7	[Sbno2 - strawberry notch homolog 2 (drosophila), Anxa3 - annexin a3, Dysf - dysferlin, Fcer1g - fc receptor, ige, high affinity i, gamma polypeptide, Cx3cr1 - chemokine (c-x3-c) receptor 1, Dock2 - dedicator of cyto-kinesis 2, Sucnr1 - succinate receptor 1]
GO:0002366	leukocyte activation involved in immune response	0.000149	0.00842	3.26	12888	81	634	13	[Apbb1ip - amyloid beta (a4) precursor protein-binding, family b, member 1 interacting protein, Anxa3 - annexin a3, Sbno2 - strawberry notch homolog 2 (drosophila), Lgals1 - lectin, galactose binding, soluble 1, Dysf - dysferlin, Tlr4 - toll-like receptor 4, Dock2 - dedicator of cyto-kinesis 2, Tmem98 - transmembrane protein 98, Fcer1g - fc receptor, ige, high affinity i, gamma polypeptide, Cx3cr…
GO:0071621	granulocyte chemotaxis	0.000152	0.00856	4.93	12888	33	634	8	[Itga9 - integrin alpha 9, Cxcl5 - chemokine (c-x-c motif) ligand 5, Fcgr3 - fc receptor, igg, low affinity iii, Fcer1g - fc receptor, ige, high affinity i, gamma polypeptide, Itga1 - integrin alpha 1, Cxcl9 - chemokine (c-x-c motif) ligand 9, Ccl7 - chemokine (c-c motif) ligand 7, Itgb2 - integrin beta 2]
GO:0050974	detection of mechanical stimulus involved in sensory perception	0.000152	0.00853	4.93	12888	33	634	8	[Pcdh15 - protocadherin 15, Tlr4 - toll-like receptor 4, Pawr - prkc, apoptosis, wt1, regulator, Myc - myelocytomatosis oncogene, Gpr98 - g protein-coupled receptor 98, Slc12a2 - solute carrier family 12, member 2, Col11a1 - collagen, type xi, alpha 1, Piezo2 - piezo-type mechanosensitive ion channel component 2]
GO:0045860	positive regulation of protein kinase activity	0.000155	0.00863	1.95	12888	355	634	34	[Iqgap3 - iq motif containing gtpase activating protein 3, Lpar1 - lysophosphatidic acid receptor 1, Tlr4 - toll-like receptor 4, Ddr2 - discoidin domain receptor family, member 2, Zak - sterile alpha motif and leucine zipper containing kinase azk, Itga1 - integrin alpha 1, Efna1 - ephrin a1, Ret - ret proto-oncogene, Tgfb1 - transforming growth factor, beta 1, Cd74 - cd74 antigen (invariant poly…
GO:0050707	regulation of cytokine secretion	0.000158	0.00879	2.72	12888	127	634	17	[Mbp - myelin basic protein, Fn1 - fibronectin 1, Tnfrsf1b - tumor necrosis factor receptor superfamily, member 1b, Lgals9 - lectin, galactose binding, soluble 9, Tlr4 - toll-like receptor 4, Frmd8 - ferm domain containing 8, Unc93b1 - unc-93 homolog b1 (c. elegans), Ddx58 - dead (asp-glu-ala-asp) box polypeptide 58, Il1r2 - interleukin 1 receptor, type ii, Csf1r - colony stimulating factor 1 rec…
GO:0002460	adaptive immune response based on somatic recombination of immune receptors built from immunoglobulin superfamily domains	0.000158	0.00876	3.99	12888	51	634	10	[Cd74 - cd74 antigen (invariant polypeptide of major histocompatibility complex, class ii antigen-associated), Fas - fas (tnf receptor superfamily member 6), H2-Ab1 - histocompatibility 2, class ii antigen a, beta 1, Fcgr3 - fc receptor, igg, low affinity iii, Fcgr2b - fc receptor, igg, low affinity iib, Fcer1g - fc receptor, ige, high affinity i, gamma polypeptide, Myd88 - myeloid differentiatio…
GO:0032677	regulation of interleukin-8 production	0.000165	0.00909	4.36	12888	42	634	9	[Cd74 - cd74 antigen (invariant polypeptide of major histocompatibility complex, class ii antigen-associated), Tlr7 - toll-like receptor 7, Afap1l2 - actin filament associated protein 1-like 2, Myd88 - myeloid differentiation primary response gene 88, Tlr4 - toll-like receptor 4, Bcl3 - b cell leukemia/lymphoma 3, Ssc5d - scavenger receptor cysteine rich domain containing (5 domains), Ddx58 - dea…
GO:0042509	regulation of tyrosine phosphorylation of STAT protein	0.000165	0.00905	4.36	12888	42	634	9	[Hpx - hemopexin, Lif - leukemia inhibitory factor, Csf1r - colony stimulating factor 1 receptor, Ctf1 - cardiotrophin 1, Socs3 - suppressor of cytokine signaling 3, Tnfrsf1a - tumor necrosis factor receptor superfamily, member 1a, Irf1 - interferon regulatory factor 1, Cav1 - caveolin 1, caveolae protein, Crlf1 - cytokine receptor-like factor 1]
GO:0048856	anatomical structure development	0.000167	0.00911	1.3	12888	2457	634	157	[Slc5a3 - solute carrier family 5 (inositol transporters), member 3, Fas - fas (tnf receptor superfamily member 6), Ptgis - prostaglandin i2 (prostacyclin) synthase, Ddr2 - discoidin domain receptor family, member 2, Pth1r - parathyroid hormone 1 receptor, Cenpf - centromere protein f, Ascl1 - achaete-scute complex homolog 1 (drosophila), Igsf10 - immunoglobulin superfamily, member 10, Bfsp2 - be…
GO:0033598	mammary gland epithelial cell proliferation	0.000168	0.00917	8.47	12888	12	634	5	[Stat6 - signal transducer and activator of transcription 6, Epha2 - eph receptor a2, Cebpb - ccaat/enhancer binding protein (c/ebp), beta, Tnfsf11 - tumor necrosis factor (ligand) superfamily, member 11, Ccnd1 - cyclin d1]
GO:0050910	detection of mechanical stimulus involved in sensory perception of sound	0.000168	0.00913	8.47	12888	12	634	5	[Pcdh15 - protocadherin 15, Myc - myelocytomatosis oncogene, Gpr98 - g protein-coupled receptor 98, Col11a1 - collagen, type xi, alpha 1, Slc12a2 - solute carrier family 12, member 2]
GO:0001763	morphogenesis of a branching structure	0.000172	0.00932	2.61	12888	140	634	18	[Col13a1 - collagen, type xiii, alpha 1, Sfrp1 - secreted frizzled-related protein 1, Vdr - vitamin d receptor, Myc - myelocytomatosis oncogene, Sox10 - sry-box containing gene 10, Tgfb1 - transforming growth factor, beta 1, Tgm2 - transglutaminase 2, c polypeptide, Notch4 - notch 4, Mgp - matrix gla protein, Socs3 - suppressor of cytokine signaling 3, Bmp4 - bone morphogenetic protein 4, Fgf2 - …
GO:0045861	negative regulation of proteolysis	0.000185	0.00997	2.24	12888	218	634	24	[Serpinf2 - serine (or cysteine) peptidase inhibitor, clade f, member 2, Cd59a - cd59a antigen, Rffl - ring finger and fyve like domain containing protein, Serping1 - serine (or cysteine) peptidase inhibitor, clade g, member 1, Hfe - hemochromatosis, Wfdc2 - wap four-disulfide core domain 2, Tmem98 - transmembrane protein 98, Efna1 - ephrin a1, Avp - arginine vasopressin, Serpind1 - serine (or cy…
GO:0002718	regulation of cytokine production involved in immune response	0.000188	0.0101	3.91	12888	52	634	10	[Cd74 - cd74 antigen (invariant polypeptide of major histocompatibility complex, class ii antigen-associated), Jak3 - janus kinase 3, Tnfrsf1b - tumor necrosis factor receptor superfamily, member 1b, Malt1 - mucosa associated lymphoid tissue lymphoma translocation gene 1, Fcer1g - fc receptor, ige, high affinity i, gamma polypeptide, Tlr4 - toll-like receptor 4, Hfe - hemochromatosis, Ddx58 - dea…
GO:0051896	regulation of protein kinase B signaling	0.000211	0.0113	2.76	12888	118	634	16	[Tnfsf11 - tumor necrosis factor (ligand) superfamily, member 11, Mmp3 - matrix metallopeptidase 3, Tgfb1 - transforming growth factor, beta 1, Ret - ret proto-oncogene, Phlda3 - pleckstrin homology-like domain, family a, member 3, Rcn3 - reticulocalbin 3, ef-hand calcium binding domain, Igfbp5 - insulin-like growth factor binding protein 5, Cx3cr1 - chemokine (c-x3-c) receptor 1, Thbs1 - thrombo…
GO:0051897	positive regulation of protein kinase B signaling	0.000211	0.0113	3.34	12888	73	634	12	[Igfbp5 - insulin-like growth factor binding protein 5, Cx3cr1 - chemokine (c-x3-c) receptor 1, Thbs1 - thrombospondin 1, Fgf2 - fibroblast growth factor 2, Nox4 - nadph oxidase 4, Chi3l1 - chitinase 3-like 1, Met - met proto-oncogene, Tnfsf11 - tumor necrosis factor (ligand) superfamily, member 11, Angpt1 - angiopoietin 1, C1qtnf1 - c1q and tumor necrosis factor related protein 1, Tgfb1 - transf…
GO:0002821	positive regulation of adaptive immune response	0.000211	0.0112	3.34	12888	73	634	12	[Hpx - hemopexin, Cd74 - cd74 antigen (invariant polypeptide of major histocompatibility complex, class ii antigen-associated), H2-Ab1 - histocompatibility 2, class ii antigen a, beta 1, Fcgr3 - fc receptor, igg, low affinity iii, Cd24a - cd24a antigen, Irf1 - interferon regulatory factor 1, Malt1 - mucosa associated lymphoid tissue lymphoma translocation gene 1, Fcer1g - fc receptor, ige, high a…
GO:0070661	leukocyte proliferation	0.000223	0.0118	3.55	12888	63	634	11	[Csf1r - colony stimulating factor 1 receptor, Msn - moesin, Malt1 - mucosa associated lymphoid tissue lymphoma translocation gene 1, Dock2 - dedicator of cyto-kinesis 2, Tlr4 - toll-like receptor 4, Ctps - cytidine 5'-triphosphate synthase, Itgad - integrin, alpha d, Tnfsf11 - tumor necrosis factor (ligand) superfamily, member 11, Tgfb1 - transforming growth factor, beta 1, Cd151 - cd151 antigen…
GO:0010950	positive regulation of endopeptidase activity	0.000233	0.0123	2.73	12888	119	634	16	[Fas - fas (tnf receptor superfamily member 6), Mbp - myelin basic protein, Uaca - uveal autoantigen with coiled-coil domains and ankyrin repeats, Malt1 - mucosa associated lymphoid tissue lymphoma translocation gene 1, Gsn - gelsolin, Casp12 - caspase 12, Pawr - prkc, apoptosis, wt1, regulator, Dap - death-associated protein, Myc - myelocytomatosis oncogene, Efna1 - ephrin a1, Ret - ret proto-on…
GO:2000377	regulation of reactive oxygen species metabolic process	0.000235	0.0124	2.48	12888	156	634	19	[Fbln5 - fibulin 5, Ptgis - prostaglandin i2 (prostacyclin) synthase, Cyp1b1 - cytochrome p450, family 1, subfamily b, polypeptide 1, Tspo - translocator protein, Tlr4 - toll-like receptor 4, Mmp3 - matrix metallopeptidase 3, Tgfb1 - transforming growth factor, beta 1, Cryab - crystallin, alpha b, Itgb2 - integrin beta 2, Ptx3 - pentraxin related gene, Ddah2 - dimethylarginine dimethylaminohydrol…
GO:0002263	cell activation involved in immune response	0.000245	0.0128	3.11	12888	85	634	13	[Apbb1ip - amyloid beta (a4) precursor protein-binding, family b, member 1 interacting protein, Anxa3 - annexin a3, Sbno2 - strawberry notch homolog 2 (drosophila), Lgals1 - lectin, galactose binding, soluble 1, Dysf - dysferlin, Tlr4 - toll-like receptor 4, Dock2 - dedicator of cyto-kinesis 2, Tmem98 - transmembrane protein 98, Fcer1g - fc receptor, ige, high affinity i, gamma polypeptide, Cx3cr…
GO:0060537	muscle tissue development	0.000245	0.0128	3.11	12888	85	634	13	[Dysf - dysferlin, Pgm5 - phosphoglucomutase 5, Itga8 - integrin alpha 8, Vamp5 - vesicle-associated membrane protein 5, Hspg2 - perlecan (heparan sulfate proteoglycan 2), Tgfb1 - transforming growth factor, beta 1, Casp8 - caspase 8, Bmp4 - bone morphogenetic protein 4, Cav1 - caveolin 1, caveolae protein, Met - met proto-oncogene, Eln - elastin, Sgcd - sarcoglycan, delta (dystrophin-associated …
GO:1903706	regulation of hemopoiesis	0.000256	0.0133	2.08	12888	264	634	27	[Jak3 - janus kinase 3, Fas - fas (tnf receptor superfamily member 6), Fos - fbj osteosarcoma oncogene, Tmem176b - transmembrane protein 176b, Tgfb1 - transforming growth factor, beta 1, Cd74 - cd74 antigen (invariant polypeptide of major histocompatibility complex, class ii antigen-associated), Lif - leukemia inhibitory factor, Csf1r - colony stimulating factor 1 receptor, Bmp4 - bone morphogene…
GO:0071345	cellular response to cytokine stimulus	0.000258	0.0134	1.96	12888	321	634	31	[Gbp7 - guanylate binding protein 7, Jak3 - janus kinase 3, Laptm5 - lysosomal-associated protein transmembrane 5, Fn1 - fibronectin 1, Cebpa - ccaat/enhancer binding protein (c/ebp), alpha, Gsn - gelsolin, Tlr4 - toll-like receptor 4, Gbp3 - guanylate binding protein 3, Pcolce - procollagen c-endopeptidase enhancer protein, Ifi47 - interferon gamma inducible protein 47, Csf1r - colony stimulatin…
GO:0002861	regulation of inflammatory response to antigenic stimulus	0.000262	0.0135	7.82	12888	13	634	5	[Gpr17 - g protein-coupled receptor 17, Fcgr3 - fc receptor, igg, low affinity iii, Cd24a - cd24a antigen, Fcgr2b - fc receptor, igg, low affinity iib, Fcer1g - fc receptor, ige, high affinity i, gamma polypeptide]
GO:0023051	regulation of signaling	0.000264	0.0136	1.29	12888	2480	634	157	[Fas - fas (tnf receptor superfamily member 6), Chrnb4 - cholinergic receptor, nicotinic, beta polypeptide 4, Ptgis - prostaglandin i2 (prostacyclin) synthase, Mal - myelin and lymphocyte protein, t cell differentiation protein, Il19 - interleukin 19, Gsn - gelsolin, Ascl1 - achaete-scute complex homolog 1 (drosophila), Hspb1 - heat shock protein 1, Pde3a - phosphodiesterase 3a, cgmp inhibited, S…
GO:0009615	response to virus	0.000278	0.0142	2.44	12888	158	634	19	[Slfn8 - schlafen 8, Lgals9 - lectin, galactose binding, soluble 9, Irf1 - interferon regulatory factor 1, Myd88 - myeloid differentiation primary response gene 88, Oas1a - 2'-5' oligoadenylate synthetase 1a, Unc93b1 - unc-93 homolog b1 (c. elegans), Ddx58 - dead (asp-glu-ala-asp) box polypeptide 58, Cxcl9 - chemokine (c-x-c motif) ligand 9, Kcnj8 - potassium inwardly-rectifying channel, subfamil…
GO:0051716	cellular response to stimulus	0.000279	0.0142	1.32	12888	2043	634	133	[Gbp7 - guanylate binding protein 7, Ptgfr - prostaglandin f receptor, Fas - fas (tnf receptor superfamily member 6), Ptgis - prostaglandin i2 (prostacyclin) synthase, Gsn - gelsolin, Ddx58 - dead (asp-glu-ala-asp) box polypeptide 58, Pde3a - phosphodiesterase 3a, cgmp inhibited, Hspb1 - heat shock protein 1, Socs3 - suppressor of cytokine signaling 3, Gbp9 - guanylate-binding protein 9, Fcer1g -…
GO:0033674	positive regulation of kinase activity	0.000293	0.0149	1.86	12888	382	634	35	[Iqgap3 - iq motif containing gtpase activating protein 3, Lpar1 - lysophosphatidic acid receptor 1, Tlr4 - toll-like receptor 4, Ddr2 - discoidin domain receptor family, member 2, Zak - sterile alpha motif and leucine zipper containing kinase azk, Itga1 - integrin alpha 1, Efna1 - ephrin a1, Ret - ret proto-oncogene, Tgfb1 - transforming growth factor, beta 1, Cd74 - cd74 antigen (invariant poly…
GO:0070374	positive regulation of ERK1 and ERK2 cascade	0.000293	0.0148	2.51	12888	146	634	18	[Serpinf2 - serine (or cysteine) peptidase inhibitor, clade f, member 2, Glipr2 - gli pathogenesis-related 2, Pdgfra - platelet derived growth factor receptor, alpha polypeptide, Tlr4 - toll-like receptor 4, Pla2g5 - phospholipase a2, group v, Tnfsf11 - tumor necrosis factor (ligand) superfamily, member 11, Tgfb1 - transforming growth factor, beta 1, Fgfr4 - fibroblast growth factor receptor 4, C…
GO:0010646	regulation of cell communication	0.000294	0.0148	1.29	12888	2467	634	156	[Fas - fas (tnf receptor superfamily member 6), Chrnb4 - cholinergic receptor, nicotinic, beta polypeptide 4, Ptgis - prostaglandin i2 (prostacyclin) synthase, Mal - myelin and lymphocyte protein, t cell differentiation protein, Il19 - interleukin 19, Gsn - gelsolin, Ascl1 - achaete-scute complex homolog 1 (drosophila), Hspb1 - heat shock protein 1, Pde3a - phosphodiesterase 3a, cgmp inhibited, S…
GO:0006693	prostaglandin metabolic process	0.000296	0.0149	6.1	12888	20	634	6	[Cd74 - cd74 antigen (invariant polypeptide of major histocompatibility complex, class ii antigen-associated), Akr1c13 - aldo-keto reductase family 1, member c13, Ptgis - prostaglandin i2 (prostacyclin) synthase, Tnfrsf1a - tumor necrosis factor receptor superfamily, member 1a, Hpgd - hydroxyprostaglandin dehydrogenase 15 (nad), Ptges - prostaglandin e synthase]
GO:0006692	prostanoid metabolic process	0.000296	0.0149	6.1	12888	20	634	6	[Cd74 - cd74 antigen (invariant polypeptide of major histocompatibility complex, class ii antigen-associated), Akr1c13 - aldo-keto reductase family 1, member c13, Tnfrsf1a - tumor necrosis factor receptor superfamily, member 1a, Ptgis - prostaglandin i2 (prostacyclin) synthase, Hpgd - hydroxyprostaglandin dehydrogenase 15 (nad), Ptges - prostaglandin e synthase]
GO:0050900	leukocyte migration	0.000299	0.0149	2.9	12888	98	634	14	[Itga9 - integrin alpha 9, Ano6 - anoctamin 6, Fcgr3 - fc receptor, igg, low affinity iii, Itga1 - integrin alpha 1, Cxcl9 - chemokine (c-x-c motif) ligand 9, Tnfsf11 - tumor necrosis factor (ligand) superfamily, member 11, Itgb2 - integrin beta 2, Cxcl5 - chemokine (c-x-c motif) ligand 5, Msn - moesin, Cd24a - cd24a antigen, Fcer1g - fc receptor, ige, high affinity i, gamma polypeptide, Cx3cr1 -…
GO:0098609	cell-cell adhesion	0.000301	0.015	2	12888	295	634	29	[Igsf9b - immunoglobulin superfamily, member 9b, Col13a1 - collagen, type xiii, alpha 1, Pvr - poliovirus receptor, Epcam - epithelial cell adhesion molecule, Nt5e - 5' nucleotidase, ecto, Ret - ret proto-oncogene, Plxnb3 - plexin b3, Cdh24 - cadherin-like 24, Cdsn - corneodesmosin, Cx3cr1 - chemokine (c-x3-c) receptor 1, Mag - myelin-associated glycoprotein, Lims2 - lim and senescent cell antige…
GO:0048146	positive regulation of fibroblast proliferation	0.000304	0.0151	3.7	12888	55	634	10	[Cd74 - cd74 antigen (invariant polypeptide of major histocompatibility complex, class ii antigen-associated), Sphk1 - sphingosine kinase 1, Fn1 - fibronectin 1, Ccna2 - cyclin a2, Pdgfra - platelet derived growth factor receptor, alpha polypeptide, Ddr2 - discoidin domain receptor family, member 2, Myc - myelocytomatosis oncogene, Tgfb1 - transforming growth factor, beta 1, Tdgf1 - teratocarcino…
GO:0035556	intracellular signal transduction	0.000308	0.0152	1.48	12888	1060	634	77	[Nfatc2 - nuclear factor of activated t cells, cytoplasmic, calcineurin dependent 2, Jak3 - janus kinase 3, Gucy2f - guanylate cyclase 2f, Ptgfr - prostaglandin f receptor, Sphk1 - sphingosine kinase 1, Emr1 - egf-like module containing, mucin-like, hormone receptor-like sequence 1, Gpr126 - g protein-coupled receptor 126, Iqgap3 - iq motif containing gtpase activating protein 3, Gsn - gelsolin, …
GO:0002526	acute inflammatory response	0.000323	0.0159	5.08	12888	28	634	7	[Bdkrb2 - bradykinin receptor, beta 2, Serpinf2 - serine (or cysteine) peptidase inhibitor, clade f, member 2, Nupr1 - nuclear protein transcription regulator 1, Fn1 - fibronectin 1, Fcgr3 - fc receptor, igg, low affinity iii, Stat3 - signal transducer and activator of transcription 3, F8 - coagulation factor viii]
GO:0035456	response to interferon-beta	0.000323	0.0159	5.08	12888	28	634	7	[Ifi47 - interferon gamma inducible protein 47, Irf1 - interferon regulatory factor 1, Gbp3 - guanylate binding protein 3, Iigp1 - interferon inducible gtpase 1, Ifitm6 - interferon induced transmembrane protein 6, Xaf1 - xiap associated factor 1, Gbp2 - guanylate binding protein 2]
GO:0097529	myeloid leukocyte migration	0.000354	0.0173	3.63	12888	56	634	10	[Itga9 - integrin alpha 9, Cxcl5 - chemokine (c-x-c motif) ligand 5, Fcgr3 - fc receptor, igg, low affinity iii, Fcer1g - fc receptor, ige, high affinity i, gamma polypeptide, Cx3cr1 - chemokine (c-x3-c) receptor 1, Tnfsf11 - tumor necrosis factor (ligand) superfamily, member 11, Cxcl9 - chemokine (c-x-c motif) ligand 9, Itga1 - integrin alpha 1, Ccl7 - chemokine (c-c motif) ligand 7, Itgb2 - int…
GO:0046634	regulation of alpha-beta T cell activation	0.000354	0.0173	3.63	12888	56	634	10	[Jak3 - janus kinase 3, H2-Ab1 - histocompatibility 2, class ii antigen a, beta 1, Lgals9 - lectin, galactose binding, soluble 9, Cd24a - cd24a antigen, Irf1 - interferon regulatory factor 1, Malt1 - mucosa associated lymphoid tissue lymphoma translocation gene 1, Hfe - hemochromatosis, Zc3h12a - zinc finger ccch type containing 12a, Tgfb1 - transforming growth factor, beta 1, Ager - advanced gly…
GO:0010718	positive regulation of epithelial to mesenchymal transition	0.000356	0.0173	4.4	12888	37	634	8	[Glipr2 - gli pathogenesis-related 2, Ezh2 - enhancer of zeste homolog 2 (drosophila), Loxl2 - lysyl oxidase-like 2, Col1a1 - collagen, type i, alpha 1, Bmp4 - bone morphogenetic protein 4, Tgfb1 - transforming growth factor, beta 1, Ager - advanced glycosylation end product-specific receptor, Crb2 - crumbs homolog 2 (drosophila)]
GO:0002224	toll-like receptor signaling pathway	0.000356	0.0173	4.4	12888	37	634	8	[Tlr7 - toll-like receptor 7, Cd86 - cd86 antigen, Lgals9 - lectin, galactose binding, soluble 9, Myd88 - myeloid differentiation primary response gene 88, Tlr4 - toll-like receptor 4, Tlr13 - toll-like receptor 13, Unc93b1 - unc-93 homolog b1 (c. elegans), Cd14 - cd14 antigen]
GO:0002824	positive regulation of adaptive immune response based on somatic recombination of immune receptors built from immunoglobulin superfamily domains	0.000389	0.0188	3.34	12888	67	634	11	[Hpx - hemopexin, Fcgr3 - fc receptor, igg, low affinity iii, H2-Ab1 - histocompatibility 2, class ii antigen a, beta 1, Cd24a - cd24a antigen, Irf1 - interferon regulatory factor 1, Malt1 - mucosa associated lymphoid tissue lymphoma translocation gene 1, Fcer1g - fc receptor, ige, high affinity i, gamma polypeptide, Stat6 - signal transducer and activator of transcription 6, Hfe - hemochromatosi…
GO:0045408	regulation of interleukin-6 biosynthetic process	0.000392	0.0189	7.26	12888	14	634	5	[Cd74 - cd74 antigen (invariant polypeptide of major histocompatibility complex, class ii antigen-associated), Tlr4 - toll-like receptor 4, Cebpb - ccaat/enhancer binding protein (c/ebp), beta, Stat3 - signal transducer and activator of transcription 3, Ager - advanced glycosylation end product-specific receptor]
GO:0045862	positive regulation of proteolysis	0.000412	0.0198	2.02	12888	272	634	27	[Fas - fas (tnf receptor superfamily member 6), Ctsc - cathepsin c, Gsn - gelsolin, Pawr - prkc, apoptosis, wt1, regulator, Dap - death-associated protein, Efna1 - ephrin a1, Ret - ret proto-oncogene, Fgfr4 - fibroblast growth factor receptor 4, St18 - suppression of tumorigenicity 18, Antxr1 - anthrax toxin receptor 1, Rcn3 - reticulocalbin 3, ef-hand calcium binding domain, Zc3h12a - zinc finge…
GO:0030199	collagen fibril organization	0.000432	0.0207	4.28	12888	38	634	8	[Serpinf2 - serine (or cysteine) peptidase inhibitor, clade f, member 2, Loxl2 - lysyl oxidase-like 2, Cyp1b1 - cytochrome p450, family 1, subfamily b, polypeptide 1, Col1a1 - collagen, type i, alpha 1, Ddr2 - discoidin domain receptor family, member 2, Tnxb - tenascin xb, Col5a1 - collagen, type v, alpha 1, Col11a1 - collagen, type xi, alpha 1]
GO:0015850	organic hydroxy compound transport	0.000444	0.0211	3.29	12888	68	634	11	[Slc5a3 - solute carrier family 5 (inositol transporters), member 3, Slc10a6 - solute carrier family 10 (sodium/bile acid cotransporter family), member 6, Fcgr3 - fc receptor, igg, low affinity iii, Slc16a1 - solute carrier family 16 (monocarboxylic acid transporters), member 1, Aqp9 - aquaporin 9, Fcer1g - fc receptor, ige, high affinity i, gamma polypeptide, Abcc3 - atp-binding cassette, sub-fa…
GO:2000379	positive regulation of reactive oxygen species metabolic process	0.000449	0.0214	3.09	12888	79	634	12	[Ptx3 - pentraxin related gene, Ddah2 - dimethylarginine dimethylaminohydrolase 2, Cyp1b1 - cytochrome p450, family 1, subfamily b, polypeptide 1, Thbs1 - thrombospondin 1, Tspo - translocator protein, Gadd45a - growth arrest and dna-damage-inducible 45 alpha, Tlr4 - toll-like receptor 4, Nox4 - nadph oxidase 4, Zc3h12a - zinc finger ccch type containing 12a, Tgfb1 - transforming growth factor, b…
GO:1902107	positive regulation of leukocyte differentiation	0.000454	0.0215	2.79	12888	102	634	14	[Fos - fbj osteosarcoma oncogene, H2-Aa - histocompatibility 2, class ii antigen a, alpha, Lgals9 - lectin, galactose binding, soluble 9, Irf1 - interferon regulatory factor 1, Malt1 - mucosa associated lymphoid tissue lymphoma translocation gene 1, Tnfsf11 - tumor necrosis factor (ligand) superfamily, member 11, Tgfb1 - transforming growth factor, beta 1, Casp8 - caspase 8, Cd74 - cd74 antigen (…
GO:0002883	regulation of hypersensitivity	0.000457	0.0216	15.25	12888	4	634	3	[Fcgr3 - fc receptor, igg, low affinity iii, Fcgr2b - fc receptor, igg, low affinity iib, Fcer1g - fc receptor, ige, high affinity i, gamma polypeptide]
GO:0071216	cellular response to biotic stimulus	0.000457	0.0215	2.67	12888	114	634	15	[Sbno2 - strawberry notch homolog 2 (drosophila), Tnfrsf1b - tumor necrosis factor receptor superfamily, member 1b, Fcgr2b - fc receptor, igg, low affinity iib, Myd88 - myeloid differentiation primary response gene 88, Plscr2 - phospholipid scramblase 2, Tlr4 - toll-like receptor 4, Vdr - vitamin d receptor, Cxcl9 - chemokine (c-x-c motif) ligand 9, Gbp2 - guanylate binding protein 2, Cxcl5 - che…
GO:0045089	positive regulation of innate immune response	0.000457	0.0214	2.67	12888	114	634	15	[Lgals9 - lectin, galactose binding, soluble 9, Myd88 - myeloid differentiation primary response gene 88, Tlr4 - toll-like receptor 4, Unc93b1 - unc-93 homolog b1 (c. elegans), Pvr - poliovirus receptor, Ddx58 - dead (asp-glu-ala-asp) box polypeptide 58, 5730559C18Rik - riken cdna 5730559c18 gene, Hpx - hemopexin, Cd74 - cd74 antigen (invariant polypeptide of major histocompatibility complex, cla…
GO:0051345	positive regulation of hydrolase activity	0.000471	0.022	1.8	12888	407	634	36	[Fas - fas (tnf receptor superfamily member 6), Gsn - gelsolin, Lpar1 - lysophosphatidic acid receptor 1, Dap - death-associated protein, Pawr - prkc, apoptosis, wt1, regulator, Itga1 - integrin alpha 1, Efna1 - ephrin a1, Ret - ret proto-oncogene, St18 - suppression of tumorigenicity 18, Antxr1 - anthrax toxin receptor 1, Rcn3 - reticulocalbin 3, ef-hand calcium binding domain, Nedd9 - neural pr…
GO:0071346	cellular response to interferon-gamma	0.000474	0.0221	3.5	12888	58	634	10	[Gbp7 - guanylate binding protein 7, H2-Ab1 - histocompatibility 2, class ii antigen a, beta 1, Gbp9 - guanylate-binding protein 9, Gsn - gelsolin, Gbp3 - guanylate binding protein 3, Tlr4 - toll-like receptor 4, Ccl7 - chemokine (c-c motif) ligand 7, Gbp2 - guanylate binding protein 2, Tdgf1 - teratocarcinoma-derived growth factor 1, Flnb - filamin, beta]
GO:1903708	positive regulation of hemopoiesis	0.00049	0.0228	2.56	12888	127	634	16	[Ankrd54 - ankyrin repeat domain 54, Fos - fbj osteosarcoma oncogene, H2-Aa - histocompatibility 2, class ii antigen a, alpha, Lgals9 - lectin, galactose binding, soluble 9, Irf1 - interferon regulatory factor 1, Malt1 - mucosa associated lymphoid tissue lymphoma translocation gene 1, Tnfsf11 - tumor necrosis factor (ligand) superfamily, member 11, Tgfb1 - transforming growth factor, beta 1, Casp…
GO:0055065	metal ion homeostasis	0.000503	0.0233	1.76	12888	439	634	38	[Gpr17 - g protein-coupled receptor 17, Jak3 - janus kinase 3, Ptgfr - prostaglandin f receptor, Lpar1 - lysophosphatidic acid receptor 1, Vdr - vitamin d receptor, Pawr - prkc, apoptosis, wt1, regulator, Pth1r - parathyroid hormone 1 receptor, Tgfb1 - transforming growth factor, beta 1, Slc39a14 - solute carrier family 39 (zinc transporter), member 14, Cx3cr1 - chemokine (c-x3-c) receptor 1, Bmp…
GO:0051347	positive regulation of transferase activity	0.000503	0.0232	1.76	12888	439	634	38	[Iqgap3 - iq motif containing gtpase activating protein 3, Lpar1 - lysophosphatidic acid receptor 1, Ddr2 - discoidin domain receptor family, member 2, Tlr4 - toll-like receptor 4, Zak - sterile alpha motif and leucine zipper containing kinase azk, Itga1 - integrin alpha 1, Efna1 - ephrin a1, Ret - ret proto-oncogene, Tgfb1 - transforming growth factor, beta 1, Cd74 - cd74 antigen (invariant poly…
GO:0032757	positive regulation of interleukin-8 production	0.000509	0.0234	4.74	12888	30	634	7	[Cd74 - cd74 antigen (invariant polypeptide of major histocompatibility complex, class ii antigen-associated), Tlr7 - toll-like receptor 7, Myd88 - myeloid differentiation primary response gene 88, Afap1l2 - actin filament associated protein 1-like 2, Tlr4 - toll-like receptor 4, Ddx58 - dead (asp-glu-ala-asp) box polypeptide 58, Cd14 - cd14 antigen]
GO:0002701	negative regulation of production of molecular mediator of immune response	0.000525	0.0241	5.54	12888	22	634	6	[Jak3 - janus kinase 3, Fcgr2b - fc receptor, igg, low affinity iib, Hfe - hemochromatosis, Angpt1 - angiopoietin 1, Tgfb1 - transforming growth factor, beta 1, Parp3 - poly (adp-ribose) polymerase family, member 3]
GO:0072376	protein activation cascade	0.000525	0.024	5.54	12888	22	634	6	[C1rb - complement component 1, r subcomponent b, C1rl - complement component 1, r subcomponent-like, Serping1 - serine (or cysteine) peptidase inhibitor, clade g, member 1, F8 - coagulation factor viii, Mvp - major vault protein, C1s - complement component 1, s subcomponent]
GO:0050869	negative regulation of B cell activation	0.000525	0.0239	5.54	12888	22	634	6	[Fas - fas (tnf receptor superfamily member 6), Cd24a - cd24a antigen, Fcgr2b - fc receptor, igg, low affinity iib, Sfrp1 - secreted frizzled-related protein 1, Pawr - prkc, apoptosis, wt1, regulator, Parp3 - poly (adp-ribose) polymerase family, member 3]
GO:0046006	regulation of activated T cell proliferation	0.000525	0.0238	5.54	12888	22	634	6	[Tnfsf9 - tumor necrosis factor (ligand) superfamily, member 9, Jak3 - janus kinase 3, Cd86 - cd86 antigen, Cd24a - cd24a antigen, Igfbp2 - insulin-like growth factor binding protein 2, Ager - advanced glycosylation end product-specific receptor]
GO:1900048	positive regulation of hemostasis	0.000564	0.0255	6.78	12888	15	634	5	[Serpinf2 - serine (or cysteine) peptidase inhibitor, clade f, member 2, Ano6 - anoctamin 6, Thbs1 - thrombospondin 1, Tlr4 - toll-like receptor 4, Plek - pleckstrin]
GO:0030194	positive regulation of blood coagulation	0.000564	0.0255	6.78	12888	15	634	5	[Serpinf2 - serine (or cysteine) peptidase inhibitor, clade f, member 2, Ano6 - anoctamin 6, Thbs1 - thrombospondin 1, Tlr4 - toll-like receptor 4, Plek - pleckstrin]
GO:2000353	positive regulation of endothelial cell apoptotic process	0.000564	0.0254	6.78	12888	15	634	5	[Ano6 - anoctamin 6, Bmp4 - bone morphogenetic protein 4, Col18a1 - collagen, type xviii, alpha 1, Thbs1 - thrombospondin 1, Ager - advanced glycosylation end product-specific receptor]
GO:0010595	positive regulation of endothelial cell migration	0.000568	0.0255	3.01	12888	81	634	12	[Anxa3 - annexin a3, Hspb1 - heat shock protein 1, Bmp4 - bone morphogenetic protein 4, Thbs1 - thrombospondin 1, Fgf2 - fibroblast growth factor 2, Nos3 - nitric oxide synthase 3, endothelial cell, Rhoj - ras homolog gene family, member j, Met - met proto-oncogene, Zc3h12a - zinc finger ccch type containing 12a, Angpt1 - angiopoietin 1, Tgfb1 - transforming growth factor, beta 1, Tdgf1 - teratoc…
GO:0002761	regulation of myeloid leukocyte differentiation	0.000568	0.0254	3.01	12888	81	634	12	[Cd74 - cd74 antigen (invariant polypeptide of major histocompatibility complex, class ii antigen-associated), Csf1r - colony stimulating factor 1 receptor, Lif - leukemia inhibitory factor, Fos - fbj osteosarcoma oncogene, Sfrp1 - secreted frizzled-related protein 1, Cebpb - ccaat/enhancer binding protein (c/ebp), beta, Myc - myelocytomatosis oncogene, Tnfsf11 - tumor necrosis factor (ligand) su…
GO:0031401	positive regulation of protein modification process	0.000573	0.0255	1.49	12888	929	634	68	[Sphk1 - sphingosine kinase 1, Fas - fas (tnf receptor superfamily member 6), Iqgap3 - iq motif containing gtpase activating protein 3, Lpar1 - lysophosphatidic acid receptor 1, Ddr2 - discoidin domain receptor family, member 2, Tlr4 - toll-like receptor 4, Itga1 - integrin alpha 1, Cd74 - cd74 antigen (invariant polypeptide of major histocompatibility complex, class ii antigen-associated), Lif -…
GO:0014706	striated muscle tissue development	0.000573	0.0255	3.19	12888	70	634	11	[Dysf - dysferlin, Cav1 - caveolin 1, caveolae protein, Pgm5 - phosphoglucomutase 5, Met - met proto-oncogene, Vamp5 - vesicle-associated membrane protein 5, Sgcd - sarcoglycan, delta (dystrophin-associated glycoprotein), Tgfb1 - transforming growth factor, beta 1, Hspg2 - perlecan (heparan sulfate proteoglycan 2), Eln - elastin, Casp8 - caspase 8, Flnb - filamin, beta]
GO:0010466	negative regulation of peptidase activity	0.000584	0.0259	2.52	12888	129	634	16	[Serpinf2 - serine (or cysteine) peptidase inhibitor, clade f, member 2, Rffl - ring finger and fyve like domain containing protein, Serping1 - serine (or cysteine) peptidase inhibitor, clade g, member 1, Wfdc2 - wap four-disulfide core domain 2, Serpind1 - serine (or cysteine) peptidase inhibitor, clade d, member 1, Avp - arginine vasopressin, Cryab - crystallin, alpha b, Serpina3m - serine (or …
GO:0010594	regulation of endothelial cell migration	0.000584	0.0258	2.52	12888	129	634	16	[Anxa3 - annexin a3, Nos3 - nitric oxide synthase 3, endothelial cell, Efna1 - ephrin a1, Tgfb1 - transforming growth factor, beta 1, Hspb1 - heat shock protein 1, Serpinf1 - serine (or cysteine) peptidase inhibitor, clade f, member 1, Bmp4 - bone morphogenetic protein 4, Thbs1 - thrombospondin 1, Fgf2 - fibroblast growth factor 2, Epha2 - eph receptor a2, Rhoj - ras homolog gene family, member j…
GO:0061138	morphogenesis of a branching epithelium	0.000584	0.0257	2.52	12888	129	634	16	[Sfrp1 - secreted frizzled-related protein 1, Vdr - vitamin d receptor, Myc - myelocytomatosis oncogene, Sox10 - sry-box containing gene 10, Tgfb1 - transforming growth factor, beta 1, Tgm2 - transglutaminase 2, c polypeptide, Notch4 - notch 4, Mgp - matrix gla protein, Socs3 - suppressor of cytokine signaling 3, Bmp4 - bone morphogenetic protein 4, Fgf2 - fibroblast growth factor 2, Epha2 - eph …
GO:0010035	response to inorganic substance	0.000591	0.026	1.89	12888	322	634	30	[Fas - fas (tnf receptor superfamily member 6), Sphk1 - sphingosine kinase 1, Fn1 - fibronectin 1, Loxl2 - lysyl oxidase-like 2, Fos - fbj osteosarcoma oncogene, Cebpa - ccaat/enhancer binding protein (c/ebp), alpha, Aqp9 - aquaporin 9, S100a16 - s100 calcium binding protein a16, Gsn - gelsolin, Rasa4 - ras p21 protein activator 4, Cpne8 - copine viii, Cybrd1 - cytochrome b reductase 1, Sucnr1 - …
GO:0046649	lymphocyte activation	0.000598	0.0262	2.11	12888	222	634	23	[Jak3 - janus kinase 3, Apbb1ip - amyloid beta (a4) precursor protein-binding, family b, member 1 interacting protein, Lgals1 - lectin, galactose binding, soluble 1, Malt1 - mucosa associated lymphoid tissue lymphoma translocation gene 1, Irf1 - interferon regulatory factor 1, Dock2 - dedicator of cyto-kinesis 2, Tlr4 - toll-like receptor 4, Ctps - cytidine 5'-triphosphate synthase, Tmem98 - tran…
GO:0032060	bleb assembly	0.000599	0.0262	9.03	12888	9	634	4	[Ano6 - anoctamin 6, Mylk - myosin, light polypeptide kinase, Emp1 - epithelial membrane protein 1, Lpar1 - lysophosphatidic acid receptor 1]
GO:0045414	regulation of interleukin-8 biosynthetic process	0.000599	0.0261	9.03	12888	9	634	4	[Cd74 - cd74 antigen (invariant polypeptide of major histocompatibility complex, class ii antigen-associated), Tlr7 - toll-like receptor 7, Tlr4 - toll-like receptor 4, Bcl3 - b cell leukemia/lymphoma 3]
GO:0051248	negative regulation of protein metabolic process	0.000615	0.0267	1.52	12888	814	634	61	[Cd59a - cd59a antigen, Jak3 - janus kinase 3, Dysf - dysferlin, Tlr4 - toll-like receptor 4, Lif - leukemia inhibitory factor, Hspb1 - heat shock protein 1, Serpina3m - serine (or cysteine) peptidase inhibitor, clade a, member 3m, Timp1 - tissue inhibitor of metalloproteinase 1, Socs3 - suppressor of cytokine signaling 3, Pbk - pdz binding kinase, Bace2 - beta-site app-cleaving enzyme 2, Kirrel …
GO:0033559	unsaturated fatty acid metabolic process	0.000623	0.0269	4.07	12888	40	634	8	[Cd74 - cd74 antigen (invariant polypeptide of major histocompatibility complex, class ii antigen-associated), Sphk1 - sphingosine kinase 1, Akr1c13 - aldo-keto reductase family 1, member c13, Tnfrsf1a - tumor necrosis factor receptor superfamily, member 1a, Cyp1b1 - cytochrome p450, family 1, subfamily b, polypeptide 1, Ptgis - prostaglandin i2 (prostacyclin) synthase, Hpgd - hydroxyprostaglandi…
GO:0097530	granulocyte migration	0.000623	0.0269	4.07	12888	40	634	8	[Itga9 - integrin alpha 9, Cxcl5 - chemokine (c-x-c motif) ligand 5, Fcgr3 - fc receptor, igg, low affinity iii, Fcer1g - fc receptor, ige, high affinity i, gamma polypeptide, Cxcl9 - chemokine (c-x-c motif) ligand 9, Itga1 - integrin alpha 1, Ccl7 - chemokine (c-c motif) ligand 7, Itgb2 - integrin beta 2]
GO:0050906	detection of stimulus involved in sensory perception	0.000627	0.027	3.39	12888	60	634	10	[Gucy2f - guanylate cyclase 2f, Pcdh15 - protocadherin 15, Cacna2d4 - calcium channel, voltage-dependent, alpha 2/delta subunit 4, Tlr4 - toll-like receptor 4, Pawr - prkc, apoptosis, wt1, regulator, Myc - myelocytomatosis oncogene, Gpr98 - g protein-coupled receptor 98, Col11a1 - collagen, type xi, alpha 1, Slc12a2 - solute carrier family 12, member 2, Piezo2 - piezo-type mechanosensitive ion ch…
GO:0032655	regulation of interleukin-12 production	0.00063	0.027	4.59	12888	31	634	7	[Tnfsf9 - tumor necrosis factor (ligand) superfamily, member 9, Jak3 - janus kinase 3, Irf1 - interferon regulatory factor 1, Thbs1 - thrombospondin 1, Tlr4 - toll-like receptor 4, Unc93b1 - unc-93 homolog b1 (c. elegans), Ager - advanced glycosylation end product-specific receptor]
GO:0014812	muscle cell migration	0.000681	0.0291	5.3	12888	23	634	6	[Plekho1 - pleckstrin homology domain containing, family o member 1, Plat - plasminogen activator, tissue, Bin3 - bridging integrator 3, Met - met proto-oncogene, Ddr1 - discoidin domain receptor family, member 1, Net1 - neuroepithelial cell transforming gene 1]
GO:2001235	positive regulation of apoptotic signaling pathway	0.000709	0.0302	2.33	12888	157	634	18	[Jak3 - janus kinase 3, Fas - fas (tnf receptor superfamily member 6), Nupr1 - nuclear protein transcription regulator 1, Sfrp1 - secreted frizzled-related protein 1, Mal - myelin and lymphocyte protein, t cell differentiation protein, Gsn - gelsolin, Il19 - interleukin 19, Ctsc - cathepsin c, Myc - myelocytomatosis oncogene, Mcl1 - myeloid cell leukemia sequence 1, Ret - ret proto-oncogene, Casp…
GO:0044093	positive regulation of molecular function	0.000716	0.0304	1.43	12888	1125	634	79	[Sphk1 - sphingosine kinase 1, Fas - fas (tnf receptor superfamily member 6), Iqgap3 - iq motif containing gtpase activating protein 3, Gsn - gelsolin, Lpar1 - lysophosphatidic acid receptor 1, Tlr4 - toll-like receptor 4, Ddr2 - discoidin domain receptor family, member 2, Fosl1 - fos-like antigen 1, Itga1 - integrin alpha 1, Ddx58 - dead (asp-glu-ala-asp) box polypeptide 58, St18 - suppression o…
GO:0071900	regulation of protein serine/threonine kinase activity	0.000728	0.0309	1.85	12888	341	634	31	[Iqgap3 - iq motif containing gtpase activating protein 3, Tlr4 - toll-like receptor 4, Lpar1 - lysophosphatidic acid receptor 1, Zak - sterile alpha motif and leucine zipper containing kinase azk, Itga1 - integrin alpha 1, Ret - ret proto-oncogene, Tgfb1 - transforming growth factor, beta 1, Cd74 - cd74 antigen (invariant polypeptide of major histocompatibility complex, class ii antigen-associat…
GO:0009582	detection of abiotic stimulus	0.000732	0.0309	3.11	12888	72	634	11	[Gucy2f - guanylate cyclase 2f, Pcdh15 - protocadherin 15, Cacna2d4 - calcium channel, voltage-dependent, alpha 2/delta subunit 4, Tlr4 - toll-like receptor 4, Pawr - prkc, apoptosis, wt1, regulator, Myc - myelocytomatosis oncogene, Gpr98 - g protein-coupled receptor 98, Piezo1 - piezo-type mechanosensitive ion channel component 1, Col11a1 - collagen, type xi, alpha 1, Slc12a2 - solute carrier fa…
GO:0009581	detection of external stimulus	0.000732	0.0308	3.11	12888	72	634	11	[Gucy2f - guanylate cyclase 2f, Pcdh15 - protocadherin 15, Cacna2d4 - calcium channel, voltage-dependent, alpha 2/delta subunit 4, Tlr4 - toll-like receptor 4, Pawr - prkc, apoptosis, wt1, regulator, Myc - myelocytomatosis oncogene, Gpr98 - g protein-coupled receptor 98, Piezo1 - piezo-type mechanosensitive ion channel component 1, Col11a1 - collagen, type xi, alpha 1, Slc12a2 - solute carrier fa…
GO:0002763	positive regulation of myeloid leukocyte differentiation	0.000741	0.0311	3.97	12888	41	634	8	[Cd74 - cd74 antigen (invariant polypeptide of major histocompatibility complex, class ii antigen-associated), Csf1r - colony stimulating factor 1 receptor, Lif - leukemia inhibitory factor, Fos - fbj osteosarcoma oncogene, Tnfsf11 - tumor necrosis factor (ligand) superfamily, member 11, Trib1 - tribbles homolog 1 (drosophila), Tgfb1 - transforming growth factor, beta 1, Casp8 - caspase 8]
GO:0032722	positive regulation of chemokine production	0.000741	0.031	3.97	12888	41	634	8	[Cd74 - cd74 antigen (invariant polypeptide of major histocompatibility complex, class ii antigen-associated), Tlr7 - toll-like receptor 7, Csf1r - colony stimulating factor 1 receptor, Mbp - myelin basic protein, Lgals9 - lectin, galactose binding, soluble 9, Myd88 - myeloid differentiation primary response gene 88, Tlr4 - toll-like receptor 4, Ager - advanced glycosylation end product-specific …
GO:0031399	regulation of protein modification process	0.000745	0.0311	1.38	12888	1371	634	93	[Fas - fas (tnf receptor superfamily member 6), Sphk1 - sphingosine kinase 1, Fn1 - fibronectin 1, Dysf - dysferlin, Iqgap3 - iq motif containing gtpase activating protein 3, Lpar1 - lysophosphatidic acid receptor 1, Tlr4 - toll-like receptor 4, Ddr2 - discoidin domain receptor family, member 2, Itga1 - integrin alpha 1, Cd74 - cd74 antigen (invariant polypeptide of major histocompatibility compl…
GO:0050766	positive regulation of phagocytosis	0.000758	0.0316	3.59	12888	51	634	9	[Ptx3 - pentraxin related gene, Ano6 - anoctamin 6, Fcgr3 - fc receptor, igg, low affinity iii, Fcgr2b - fc receptor, igg, low affinity iib, Rab31 - rab31, member ras oncogene family, Fcer1g - fc receptor, ige, high affinity i, gamma polypeptide, Dock2 - dedicator of cyto-kinesis 2, Pros1 - protein s (alpha), Ager - advanced glycosylation end product-specific receptor]
GO:0007169	transmembrane receptor protein tyrosine kinase signaling pathway	0.000783	0.0325	1.96	12888	269	634	26	[Ddr2 - discoidin domain receptor family, member 2, Efna1 - ephrin a1, Tgfb1 - transforming growth factor, beta 1, Ret - ret proto-oncogene, Fgfr4 - fibroblast growth factor receptor 4, Col4a5 - collagen, type iv, alpha 5, Sh2d6 - sh2 domain containing 6, Csf1r - colony stimulating factor 1 receptor, Hspb1 - heat shock protein 1, Mvp - major vault protein, Grb14 - growth factor receptor bound pro…
GO:0043032	positive regulation of macrophage activation	0.000787	0.0326	6.35	12888	16	634	5	[Cebpa - ccaat/enhancer binding protein (c/ebp), alpha, Lgals9 - lectin, galactose binding, soluble 9, Ctsc - cathepsin c, Thbs1 - thrombospondin 1, Tlr4 - toll-like receptor 4]
GO:0050777	negative regulation of immune response	0.000818	0.0338	2.75	12888	96	634	13	[Cd59a - cd59a antigen, Gpr17 - g protein-coupled receptor 17, Jak3 - janus kinase 3, Fcgr2b - fc receptor, igg, low affinity iib, Lgals9 - lectin, galactose binding, soluble 9, Irf1 - interferon regulatory factor 1, Hfe - hemochromatosis, Serping1 - serine (or cysteine) peptidase inhibitor, clade g, member 1, Tgfb1 - transforming growth factor, beta 1, Parp3 - poly (adp-ribose) polymerase family…
GO:0002699	positive regulation of immune effector process	0.000819	0.0337	2.45	12888	133	634	16	[Fcgr3 - fc receptor, igg, low affinity iii, Irf1 - interferon regulatory factor 1, Malt1 - mucosa associated lymphoid tissue lymphoma translocation gene 1, Tlr4 - toll-like receptor 4, Hfe - hemochromatosis, Pvr - poliovirus receptor, Ddx58 - dead (asp-glu-ala-asp) box polypeptide 58, Tgfb1 - transforming growth factor, beta 1, Cd37 - cd37 antigen, Itgb2 - integrin beta 2, Hpx - hemopexin, Cd74 …
GO:0002218	activation of innate immune response	0.000819	0.0336	3.28	12888	62	634	10	[Tlr7 - toll-like receptor 7, Cd86 - cd86 antigen, Lgals9 - lectin, galactose binding, soluble 9, Myd88 - myeloid differentiation primary response gene 88, Tlr4 - toll-like receptor 4, Tlr13 - toll-like receptor 13, Unc93b1 - unc-93 homolog b1 (c. elegans), Ddx58 - dead (asp-glu-ala-asp) box polypeptide 58, Cd14 - cd14 antigen, 5730559C18Rik - riken cdna 5730559c18 gene]
GO:0050671	positive regulation of lymphocyte proliferation	0.000824	0.0338	3.06	12888	73	634	11	[Tnfsf9 - tumor necrosis factor (ligand) superfamily, member 9, Cd74 - cd74 antigen (invariant polypeptide of major histocompatibility complex, class ii antigen-associated), Jak3 - janus kinase 3, Nfatc2 - nuclear factor of activated t cells, cytoplasmic, calcineurin dependent 2, Cd276 - cd276 antigen, Cd86 - cd86 antigen, Cd24a - cd24a antigen, Igfbp2 - insulin-like growth factor binding protein…
GO:0071396	cellular response to lipid	0.000865	0.0353	2.05	12888	228	634	23	[Id3 - inhibitor of dna binding 3, Sbno2 - strawberry notch homolog 2 (drosophila), Ptgfr - prostaglandin f receptor, Tnfrsf1b - tumor necrosis factor receptor superfamily, member 1b, Myd88 - myeloid differentiation primary response gene 88, Lpar1 - lysophosphatidic acid receptor 1, Plscr2 - phospholipid scramblase 2, Tlr4 - toll-like receptor 4, Gramd1c - gram domain containing 1c, Vdr - vitamin…
GO:0050830	defense response to Gram-positive bacterium	0.000877	0.0357	3.87	12888	42	634	8	[Gbp7 - guanylate binding protein 7, Lalba - lactalbumin, alpha, Gbp9 - guanylate-binding protein 9, Myd88 - myeloid differentiation primary response gene 88, Epha2 - eph receptor a2, Gbp3 - guanylate binding protein 3, Ssc5d - scavenger receptor cysteine rich domain containing (5 domains), Gbp2 - guanylate binding protein 2]
GO:0048660	regulation of smooth muscle cell proliferation	0.000888	0.0361	2.43	12888	134	634	16	[Serpinf2 - serine (or cysteine) peptidase inhibitor, clade f, member 2, Npr1 - natriuretic peptide receptor 1, Myd88 - myeloid differentiation primary response gene 88, Nos3 - nitric oxide synthase 3, endothelial cell, Hpgd - hydroxyprostaglandin dehydrogenase 15 (nad), Myc - myelocytomatosis oncogene, Adamts1 - a disintegrin-like and metallopeptidase (reprolysin type) with thrombospondin type 1…
GO:0045639	positive regulation of myeloid cell differentiation	0.000931	0.0377	3.23	12888	63	634	10	[Ankrd54 - ankyrin repeat domain 54, Cd74 - cd74 antigen (invariant polypeptide of major histocompatibility complex, class ii antigen-associated), Csf1r - colony stimulating factor 1 receptor, Lif - leukemia inhibitory factor, Fos - fbj osteosarcoma oncogene, Tnfsf11 - tumor necrosis factor (ligand) superfamily, member 11, Stat3 - signal transducer and activator of transcription 3, Trib1 - tribbl…
GO:1900744	regulation of p38MAPK cascade	0.00094	0.0379	4.31	12888	33	634	7	[Sphk1 - sphingosine kinase 1, Gadd45b - growth arrest and dna-damage-inducible 45 beta, Gadd45a - growth arrest and dna-damage-inducible 45 alpha, Met - met proto-oncogene, Zc3h12a - zinc finger ccch type containing 12a, Ager - advanced glycosylation end product-specific receptor, Gadd45g - growth arrest and dna-damage-inducible 45 gamma]
GO:0002712	regulation of B cell mediated immunity	0.00094	0.0378	4.31	12888	33	634	7	[Hpx - hemopexin, Fcgr3 - fc receptor, igg, low affinity iii, Fcgr2b - fc receptor, igg, low affinity iib, Fcer1g - fc receptor, ige, high affinity i, gamma polypeptide, Stat6 - signal transducer and activator of transcription 6, Tgfb1 - transforming growth factor, beta 1, Parp3 - poly (adp-ribose) polymerase family, member 3]
GO:0032732	positive regulation of interleukin-1 production	0.00094	0.0377	4.31	12888	33	634	7	[Hspb1 - heat shock protein 1, Lgals9 - lectin, galactose binding, soluble 9, Malt1 - mucosa associated lymphoid tissue lymphoma translocation gene 1, Tlr4 - toll-like receptor 4, 5730559C18Rik - riken cdna 5730559c18 gene, Ager - advanced glycosylation end product-specific receptor, Casp8 - caspase 8]
GO:0002889	regulation of immunoglobulin mediated immune response	0.00094	0.0376	4.31	12888	33	634	7	[Hpx - hemopexin, Fcgr3 - fc receptor, igg, low affinity iii, Fcgr2b - fc receptor, igg, low affinity iib, Fcer1g - fc receptor, ige, high affinity i, gamma polypeptide, Stat6 - signal transducer and activator of transcription 6, Tgfb1 - transforming growth factor, beta 1, Parp3 - poly (adp-ribose) polymerase family, member 3]
GO:0045410	positive regulation of interleukin-6 biosynthetic process	0.00096	0.0383	8.13	12888	10	634	4	[Cd74 - cd74 antigen (invariant polypeptide of major histocompatibility complex, class ii antigen-associated), Tlr4 - toll-like receptor 4, Stat3 - signal transducer and activator of transcription 3, Ager - advanced glycosylation end product-specific receptor]
GO:0031295	T cell costimulation	0.00096	0.0382	8.13	12888	10	634	4	[Lgals1 - lectin, galactose binding, soluble 1, Cd86 - cd86 antigen, Cd24a - cd24a antigen, Cav1 - caveolin 1, caveolae protein]
GO:0044406	adhesion of symbiont to host	0.00096	0.0381	8.13	12888	10	634	4	[Gbp7 - guanylate binding protein 7, Gbp9 - guanylate-binding protein 9, Gbp3 - guanylate binding protein 3, Gbp2 - guanylate binding protein 2]
GO:0030278	regulation of ossification	0.000996	0.0394	2.21	12888	175	634	19	[Id3 - inhibitor of dna binding 3, Ano6 - anoctamin 6, Fam101a - family with sequence similarity 101, member a, Sfrp1 - secreted frizzled-related protein 1, Clic1 - chloride intracellular channel 1, Cebpa - ccaat/enhancer binding protein (c/ebp), alpha, Ddr2 - discoidin domain receptor family, member 2, Lect1 - leukocyte cell derived chemotaxin 1, Tgfb1 - transforming growth factor, beta 1, Cd276…

## Sheet: Glia_down_GOprocess
GO Term	Description	P-value	FDR q-value	Enrichment	N	B	n	b	Genes
GO:0006695	cholesterol biosynthetic process	0.00026	1	82.02	13329	25	13	2	[Dhcr24 - 24-dehydrocholesterol reductase, Hmgcs1 - 3-hydroxy-3-methylglutaryl-coenzyme a synthase 1]
GO:1902653	secondary alcohol biosynthetic process	0.000304	1	75.95	13329	27	13	2	[Dhcr24 - 24-dehydrocholesterol reductase, Hmgcs1 - 3-hydroxy-3-methylglutaryl-coenzyme a synthase 1]
GO:0016126	sterol biosynthetic process	0.000428	1	64.08	13329	32	13	2	[Dhcr24 - 24-dehydrocholesterol reductase, Hmgcs1 - 3-hydroxy-3-methylglutaryl-coenzyme a synthase 1]
GO:0035249	synaptic transmission, glutamatergic	0.000775	1	47.69	13329	43	13	2	[Gria4 - glutamate receptor, ionotropic, ampa4 (alpha 4), Grm3 - glutamate receptor, metabotropic 3]
GO:0006811	ion transport	0.000821	1	6.11	13329	839	13	5	[Gria4 - glutamate receptor, ionotropic, ampa4 (alpha 4), Gabra6 - gamma-aminobutyric acid (gaba) a receptor, subunit alpha 6, ND4 - nadh dehydrogenase subunit 4, Slc7a10 - solute carrier family 7 (cationic amino acid transporter, y+ system), member 10, Slco4a1 - solute carrier organic anion transporter family, member 4a1]
GO:0098916	anterograde trans-synaptic signaling	0.000915	1	15	13329	205	13	3	[Gria4 - glutamate receptor, ionotropic, ampa4 (alpha 4), Gabra6 - gamma-aminobutyric acid (gaba) a receptor, subunit alpha 6, Grm3 - glutamate receptor, metabotropic 3]
GO:0007268	chemical synaptic transmission	0.000915	1	15	13329	205	13	3	[Gria4 - glutamate receptor, ionotropic, ampa4 (alpha 4), Gabra6 - gamma-aminobutyric acid (gaba) a receptor, subunit alpha 6, Grm3 - glutamate receptor, metabotropic 3]
GO:0042941	D-alanine transport	0.000975	1	1,025.31	13329	1	13	1	[Slc7a10 - solute carrier family 7 (cationic amino acid transporter, y+ system), member 10]
GO:0038133	ERBB2-ERBB3 signaling pathway	0.000975	1	1,025.31	13329	1	13	1	[Myoc - myocilin]
GO:0038129	ERBB3 signaling pathway	0.000975	1	1,025.31	13329	1	13	1	[Myoc - myocilin]
GO:0110077	vesicle-mediated intercellular transport	0.000975	1	1,025.31	13329	1	13	1	[Arc - activity regulated cytoskeletal-associated protein]

## Sheet: Glia_up_GOprocess
GO Term	Description	P-value	FDR q-value	Enrichment	N	B	n	b	Genes
GO:0006952	defense response	1.01e-24	1.49e-20	6.99	13329	636	126	42	[Cd44 - cd44 antigen, Icam1 - intercellular adhesion molecule 1, Bst2 - bone marrow stromal cell antigen 2, Il1r1 - interleukin 1 receptor, type i, Trim30a - tripartite motif-containing 30a, Crlf2 - cytokine receptor-like factor 2, Cd180 - cd180 antigen, Cxcl13 - chemokine (c-x-c motif) ligand 13, Ifit1 - interferon-induced protein with tetratricopeptide repeats 1, Isg15 - isg15 ubiquitin-like mo…
GO:0002376	immune system process	7.1e-23	5.21e-19	5.2	13329	976	126	48	[AF251705 - cdna sequence af251705, Cd44 - cd44 antigen, Icam1 - intercellular adhesion molecule 1, Bst2 - bone marrow stromal cell antigen 2, Trim30a - tripartite motif-containing 30a, Crlf2 - cytokine receptor-like factor 2, Cd99 - cd99 antigen, Cd274 - cd274 antigen, Fgl2 - fibrinogen-like protein 2, Cd180 - cd180 antigen, Cxcl13 - chemokine (c-x-c motif) ligand 13, Lag3 - lymphocyte-activatio…
GO:0043207	response to external biotic stimulus	2.08e-21	1.02e-17	7.16	13329	532	126	36	[Abca1 - atp-binding cassette, sub-family a (abc1), member 1, Bst2 - bone marrow stromal cell antigen 2, Trim30a - tripartite motif-containing 30a, Cd274 - cd274 antigen, Cd180 - cd180 antigen, Cxcl13 - chemokine (c-x-c motif) ligand 13, Ifit1 - interferon-induced protein with tetratricopeptide repeats 1, Isg15 - isg15 ubiquitin-like modifier, Serpina3n - serine (or cysteine) peptidase inhibitor,…
GO:0050896	response to stimulus	2.09e-21	7.67e-18	2.6	13329	3338	126	82	[Crip1 - cysteine-rich protein 1 (intestinal), Hgf - hepatocyte growth factor, Abca1 - atp-binding cassette, sub-family a (abc1), member 1, Cd44 - cd44 antigen, Il1r1 - interleukin 1 receptor, type i, Crlf2 - cytokine receptor-like factor 2, Capg - capping protein (actin filament), gelsolin-like, Mmp2 - matrix metallopeptidase 2, Cd9 - cd9 antigen, 5430435G22Rik - riken cdna 5430435g22 gene, Serp…
GO:0009607	response to biotic stimulus	7.18e-21	2.11e-17	6.9	13329	552	126	36	[Abca1 - atp-binding cassette, sub-family a (abc1), member 1, Bst2 - bone marrow stromal cell antigen 2, Trim30a - tripartite motif-containing 30a, Cd274 - cd274 antigen, Cd180 - cd180 antigen, Cxcl13 - chemokine (c-x-c motif) ligand 13, Ifit1 - interferon-induced protein with tetratricopeptide repeats 1, Isg15 - isg15 ubiquitin-like modifier, Serpina3n - serine (or cysteine) peptidase inhibitor,…
GO:0006955	immune response	7.97e-21	1.95e-17	7.49	13329	480	126	34	[Icam1 - intercellular adhesion molecule 1, Bst2 - bone marrow stromal cell antigen 2, Trim30a - tripartite motif-containing 30a, Crlf2 - cytokine receptor-like factor 2, Cd274 - cd274 antigen, Cd180 - cd180 antigen, Lag3 - lymphocyte-activation gene 3, Cxcl13 - chemokine (c-x-c motif) ligand 13, Ifit1 - interferon-induced protein with tetratricopeptide repeats 1, Irgm1 - immunity-related gtpase …
GO:0006950	response to stress	9.42e-18	1.97e-14	3.16	13329	1976	126	59	[Crip1 - cysteine-rich protein 1 (intestinal), Cd44 - cd44 antigen, Il1r1 - interleukin 1 receptor, type i, Crlf2 - cytokine receptor-like factor 2, Mmp2 - matrix metallopeptidase 2, Apod - apolipoprotein d, Serpina3n - serine (or cysteine) peptidase inhibitor, clade a, member 3n, Rtp4 - receptor transporter protein 4, Shisa5 - shisa homolog 5 (xenopus laevis), Gch1 - gtp cyclohydrolase 1, Cd68 -…
GO:0009605	response to external stimulus	9.61e-18	1.76e-14	4.71	13329	921	126	41	[Abca1 - atp-binding cassette, sub-family a (abc1), member 1, Bst2 - bone marrow stromal cell antigen 2, Trim30a - tripartite motif-containing 30a, Cd274 - cd274 antigen, Cd180 - cd180 antigen, Cxcl13 - chemokine (c-x-c motif) ligand 13, Mmp2 - matrix metallopeptidase 2, Atf3 - activating transcription factor 3, Ifit1 - interferon-induced protein with tetratricopeptide repeats 1, Isg15 - isg15 ub…
GO:0051707	response to other organism	4.45e-17	7.25e-14	7.44	13329	398	126	28	[Bst2 - bone marrow stromal cell antigen 2, Trim30a - tripartite motif-containing 30a, Cxcl13 - chemokine (c-x-c motif) ligand 13, Ifit1 - interferon-induced protein with tetratricopeptide repeats 1, Isg15 - isg15 ubiquitin-like modifier, Serpina3n - serine (or cysteine) peptidase inhibitor, clade a, member 3n, Irgm1 - immunity-related gtpase family m member 1, Rtp4 - receptor transporter protein…
GO:0002682	regulation of immune system process	2.42e-16	3.55e-13	4.42	13329	957	126	40	[Cd44 - cd44 antigen, Icam1 - intercellular adhesion molecule 1, Trim30a - tripartite motif-containing 30a, Il1r1 - interleukin 1 receptor, type i, Crlf2 - cytokine receptor-like factor 2, Cd99 - cd99 antigen, Cd274 - cd274 antigen, Cst7 - cystatin f (leukocystatin), Fgl2 - fibrinogen-like protein 2, Cxcl13 - chemokine (c-x-c motif) ligand 13, Lag3 - lymphocyte-activation gene 3, Mmp2 - matrix me…
GO:0001817	regulation of cytokine production	1.87e-14	2.5e-11	5.88	13329	504	126	28	[Anxa4 - annexin a4, Hgf - hepatocyte growth factor, AF251705 - cdna sequence af251705, Trim30a - tripartite motif-containing 30a, Il1r1 - interleukin 1 receptor, type i, Crlf2 - cytokine receptor-like factor 2, Cd274 - cd274 antigen, Lag3 - lymphocyte-activation gene 3, 5430435G22Rik - riken cdna 5430435g22 gene, Isg15 - isg15 ubiquitin-like modifier, Apod - apolipoprotein d, Rsad2 - radical s-a…
GO:0051704	multi-organism process	3.15e-14	3.86e-11	5.08	13329	646	126	31	[Icam1 - intercellular adhesion molecule 1, Ctsb - cathepsin b, Bst2 - bone marrow stromal cell antigen 2, Trim30a - tripartite motif-containing 30a, Cxcl13 - chemokine (c-x-c motif) ligand 13, Ifit1 - interferon-induced protein with tetratricopeptide repeats 1, Isg15 - isg15 ubiquitin-like modifier, Serpina3n - serine (or cysteine) peptidase inhibitor, clade a, member 3n, Irgm1 - immunity-relate…
GO:0002252	immune effector process	7.47e-14	8.43e-11	7.71	13329	302	126	22	[Itgax - integrin alpha x, Icam1 - intercellular adhesion molecule 1, Bst2 - bone marrow stromal cell antigen 2, Trim30a - tripartite motif-containing 30a, Crlf2 - cytokine receptor-like factor 2, C1qa - complement component 1, q subcomponent, alpha polypeptide, Slfn9 - schlafen 9, Fgl2 - fibrinogen-like protein 2, Ifit2 - interferon-induced protein with tetratricopeptide repeats 2, Cd180 - cd180…
GO:0045087	innate immune response	7.51e-14	7.87e-11	8.26	13329	269	126	21	[Lgals3 - lectin, galactose binding, soluble 3, Tmem106a - transmembrane protein 106a, Bst2 - bone marrow stromal cell antigen 2, Casp4 - caspase 4, apoptosis-related cysteine peptidase, Trim30a - tripartite motif-containing 30a, Cyba - cytochrome b-245, alpha polypeptide, Cybb - cytochrome b-245, beta polypeptide, C1qa - complement component 1, q subcomponent, alpha polypeptide, Cd180 - cd180 an…
GO:0002684	positive regulation of immune system process	3.44e-13	3.37e-10	5.01	13329	612	126	29	[Cd44 - cd44 antigen, Icam1 - intercellular adhesion molecule 1, Il1r1 - interleukin 1 receptor, type i, Crlf2 - cytokine receptor-like factor 2, Cd99 - cd99 antigen, Cd274 - cd274 antigen, Lag3 - lymphocyte-activation gene 3, Cxcl13 - chemokine (c-x-c motif) ligand 13, Mmp2 - matrix metallopeptidase 2, Isg15 - isg15 ubiquitin-like modifier, 5430435G22Rik - riken cdna 5430435g22 gene, Irgm1 - imm…
GO:0051239	regulation of multicellular organismal process	3.95e-13	3.62e-10	2.51	13329	2482	126	59	[Hgf - hepatocyte growth factor, Abca1 - atp-binding cassette, sub-family a (abc1), member 1, Cd44 - cd44 antigen, Il1r1 - interleukin 1 receptor, type i, Crlf2 - cytokine receptor-like factor 2, Flna - filamin, alpha, Mmp2 - matrix metallopeptidase 2, Cd9 - cd9 antigen, 5430435G22Rik - riken cdna 5430435g22 gene, Apod - apolipoprotein d, Timp2 - tissue inhibitor of metalloproteinase 2, Gch1 - gt…
GO:0098542	defense response to other organism	4.43e-13	3.82e-10	8.11	13329	261	126	20	[Itgax - integrin alpha x, Bst2 - bone marrow stromal cell antigen 2, Trim30a - tripartite motif-containing 30a, Slfn9 - schlafen 9, Ifit2 - interferon-induced protein with tetratricopeptide repeats 2, Cxcl13 - chemokine (c-x-c motif) ligand 13, Parp9 - poly (adp-ribose) polymerase family, member 9, Ifit1 - interferon-induced protein with tetratricopeptide repeats 1, Apobec1 - apolipoprotein b mr…
GO:0051607	defense response to virus	2.71e-12	2.21e-09	11.58	13329	137	126	15	[Itgax - integrin alpha x, Bst2 - bone marrow stromal cell antigen 2, Trim30a - tripartite motif-containing 30a, Slfn9 - schlafen 9, Ifit2 - interferon-induced protein with tetratricopeptide repeats 2, Ifit1 - interferon-induced protein with tetratricopeptide repeats 1, Parp9 - poly (adp-ribose) polymerase family, member 9, Apobec1 - apolipoprotein b mrna editing enzyme, catalytic polypeptide 1, …
GO:0030335	positive regulation of cell migration	4.53e-12	3.49e-09	5.63	13329	451	126	24	[Itgax - integrin alpha x, Ccl2 - chemokine (c-c motif) ligand 2, C3ar1 - complement component 3a receptor 1, Lgals3 - lectin, galactose binding, soluble 3, Hgf - hepatocyte growth factor, Itga5 - integrin alpha 5 (fibronectin receptor alpha), Icam1 - intercellular adhesion molecule 1, Il1r1 - interleukin 1 receptor, type i, Cd99 - cd99 antigen, Cd274 - cd274 antigen, Hmox1 - heme oxygenase (decy…
GO:2000147	positive regulation of cell motility	7.89e-12	5.79e-09	5.48	13329	463	126	24	[Itgax - integrin alpha x, Ccl2 - chemokine (c-c motif) ligand 2, C3ar1 - complement component 3a receptor 1, Lgals3 - lectin, galactose binding, soluble 3, Hgf - hepatocyte growth factor, Itga5 - integrin alpha 5 (fibronectin receptor alpha), Icam1 - intercellular adhesion molecule 1, Il1r1 - interleukin 1 receptor, type i, Cd99 - cd99 antigen, Cd274 - cd274 antigen, Hmox1 - heme oxygenase (decy…
GO:0051272	positive regulation of cellular component movement	1.54e-11	1.08e-08	5.31	13329	478	126	24	[Itgax - integrin alpha x, Ccl2 - chemokine (c-c motif) ligand 2, C3ar1 - complement component 3a receptor 1, Lgals3 - lectin, galactose binding, soluble 3, Hgf - hepatocyte growth factor, Itga5 - integrin alpha 5 (fibronectin receptor alpha), Icam1 - intercellular adhesion molecule 1, Il1r1 - interleukin 1 receptor, type i, Cd99 - cd99 antigen, Cd274 - cd274 antigen, Hmox1 - heme oxygenase (decy…
GO:0042221	response to chemical	1.57e-11	1.04e-08	2.71	13329	1873	126	48	[Crip1 - cysteine-rich protein 1 (intestinal), Hgf - hepatocyte growth factor, Abca1 - atp-binding cassette, sub-family a (abc1), member 1, Cd44 - cd44 antigen, Icam1 - intercellular adhesion molecule 1, Bst2 - bone marrow stromal cell antigen 2, Il1r1 - interleukin 1 receptor, type i, Capg - capping protein (actin filament), gelsolin-like, Cd274 - cd274 antigen, Cd180 - cd180 antigen, Cdo1 - cys…
GO:0006954	inflammatory response	1.57e-11	1e-08	7.74	13329	246	126	18	[Ccl2 - chemokine (c-c motif) ligand 2, C3ar1 - complement component 3a receptor 1, Cd44 - cd44 antigen, Icam1 - intercellular adhesion molecule 1, Casp4 - caspase 4, apoptosis-related cysteine peptidase, Cyba - cytochrome b-245, alpha polypeptide, Il1r1 - interleukin 1 receptor, type i, Cybb - cytochrome b-245, beta polypeptide, Crlf2 - cytokine receptor-like factor 2, Cd180 - cd180 antigen, Cxc…
GO:0040017	positive regulation of locomotion	2.59e-11	1.58e-08	5.18	13329	490	126	24	[Itgax - integrin alpha x, Ccl2 - chemokine (c-c motif) ligand 2, C3ar1 - complement component 3a receptor 1, Lgals3 - lectin, galactose binding, soluble 3, Hgf - hepatocyte growth factor, Itga5 - integrin alpha 5 (fibronectin receptor alpha), Icam1 - intercellular adhesion molecule 1, Il1r1 - interleukin 1 receptor, type i, Cd99 - cd99 antigen, Cd274 - cd274 antigen, Hmox1 - heme oxygenase (decy…
GO:0071219	cellular response to molecule of bacterial origin	3.96e-11	2.32e-08	12.28	13329	112	126	13	[Ccl2 - chemokine (c-c motif) ligand 2, Vim - vimentin, Abca1 - atp-binding cassette, sub-family a (abc1), member 1, Zfp36 - zinc finger protein 36, Cd274 - cd274 antigen, Cd180 - cd180 antigen, Cxcl13 - chemokine (c-x-c motif) ligand 13, Serpine1 - serine (or cysteine) peptidase inhibitor, clade e, member 1, Cxcl10 - chemokine (c-x-c motif) ligand 10, Gch1 - gtp cyclohydrolase 1, Fcgr4 - fc rece…
GO:0030334	regulation of cell migration	4.37e-11	2.47e-08	4.12	13329	745	126	29	[Hgf - hepatocyte growth factor, Itga5 - integrin alpha 5 (fibronectin receptor alpha), Icam1 - intercellular adhesion molecule 1, Il1r1 - interleukin 1 receptor, type i, Cd99 - cd99 antigen, Cd274 - cd274 antigen, Cxcl13 - chemokine (c-x-c motif) ligand 13, Flna - filamin, alpha, Mmp2 - matrix metallopeptidase 2, Cd9 - cd9 antigen, Mcam - melanoma cell adhesion molecule, Apod - apolipoprotein d,…
GO:0009615	response to virus	7.37e-11	4e-08	9.23	13329	172	126	15	[Itgax - integrin alpha x, Bst2 - bone marrow stromal cell antigen 2, Trim30a - tripartite motif-containing 30a, Slfn9 - schlafen 9, Ifit2 - interferon-induced protein with tetratricopeptide repeats 2, Ifit1 - interferon-induced protein with tetratricopeptide repeats 1, Parp9 - poly (adp-ribose) polymerase family, member 9, Apobec1 - apolipoprotein b mrna editing enzyme, catalytic polypeptide 1, …
GO:0051240	positive regulation of multicellular organismal process	1.06e-10	5.56e-08	2.91	13329	1491	126	41	[Hgf - hepatocyte growth factor, Abca1 - atp-binding cassette, sub-family a (abc1), member 1, AF251705 - cdna sequence af251705, Itga5 - integrin alpha 5 (fibronectin receptor alpha), Icam1 - intercellular adhesion molecule 1, Il1r1 - interleukin 1 receptor, type i, Crlf2 - cytokine receptor-like factor 2, Cd274 - cd274 antigen, Cst7 - cystatin f (leukocystatin), Flna - filamin, alpha, Isg15 - is…
GO:2000145	regulation of cell motility	1.23e-10	6.23e-08	3.94	13329	778	126	29	[Hgf - hepatocyte growth factor, Itga5 - integrin alpha 5 (fibronectin receptor alpha), Icam1 - intercellular adhesion molecule 1, Il1r1 - interleukin 1 receptor, type i, Cd99 - cd99 antigen, Cd274 - cd274 antigen, Cxcl13 - chemokine (c-x-c motif) ligand 13, Flna - filamin, alpha, Cd9 - cd9 antigen, Mmp2 - matrix metallopeptidase 2, Mcam - melanoma cell adhesion molecule, Apod - apolipoprotein d,…
GO:0009617	response to bacterium	1.36e-10	6.63e-08	8.02	13329	211	126	16	[Ccl2 - chemokine (c-c motif) ligand 2, Fkbp5 - fk506 binding protein 5, Usp18 - ubiquitin specific peptidase 18, Mt2 - metallothionein 2, Trim30a - tripartite motif-containing 30a, Cxcl13 - chemokine (c-x-c motif) ligand 13, Ifit1 - interferon-induced protein with tetratricopeptide repeats 1, Isg15 - isg15 ubiquitin-like modifier, Serpina3n - serine (or cysteine) peptidase inhibitor, clade a, me…
GO:0034097	response to cytokine	1.37e-10	6.5e-08	5.28	13329	441	126	22	[Ccl2 - chemokine (c-c motif) ligand 2, Gm4951 - predicted gene 4951, Vim - vimentin, Icam1 - intercellular adhesion molecule 1, Bst2 - bone marrow stromal cell antigen 2, Il1r1 - interleukin 1 receptor, type i, Zfp36 - zinc finger protein 36, Capg - capping protein (actin filament), gelsolin-like, Cd274 - cd274 antigen, Ifit2 - interferon-induced protein with tetratricopeptide repeats 2, Ifit1 -…
GO:0032879	regulation of localization	1.52e-10	6.97e-08	2.4	13329	2294	126	52	[Hgf - hepatocyte growth factor, Abca1 - atp-binding cassette, sub-family a (abc1), member 1, Il1r1 - interleukin 1 receptor, type i, Crlf2 - cytokine receptor-like factor 2, Cd99 - cd99 antigen, Flna - filamin, alpha, Cd9 - cd9 antigen, Mmp2 - matrix metallopeptidase 2, Mcam - melanoma cell adhesion molecule, Apod - apolipoprotein d, Tpcn2 - two pore segment channel 2, Rsad2 - radical s-adenosyl…
GO:0010033	response to organic substance	1.61e-10	7.14e-08	2.87	13329	1511	126	41	[Hgf - hepatocyte growth factor, Abca1 - atp-binding cassette, sub-family a (abc1), member 1, Cd44 - cd44 antigen, Icam1 - intercellular adhesion molecule 1, Bst2 - bone marrow stromal cell antigen 2, Il1r1 - interleukin 1 receptor, type i, Capg - capping protein (actin filament), gelsolin-like, Cd274 - cd274 antigen, Cdo1 - cysteine dioxygenase 1, cytosolic, Cd180 - cd180 antigen, Cxcl13 - chemo…
GO:0071222	cellular response to lipopolysaccharide	2.21e-10	9.55e-08	12.32	13329	103	126	12	[Ccl2 - chemokine (c-c motif) ligand 2, Cxcl13 - chemokine (c-x-c motif) ligand 13, Vim - vimentin, Abca1 - atp-binding cassette, sub-family a (abc1), member 1, Serpine1 - serine (or cysteine) peptidase inhibitor, clade e, member 1, Cxcl10 - chemokine (c-x-c motif) ligand 10, Zfp36 - zinc finger protein 36, Fcgr4 - fc receptor, igg, low affinity iv, Gch1 - gtp cyclohydrolase 1, Cd274 - cd274 anti…
GO:0002685	regulation of leukocyte migration	2.44e-10	1.02e-07	9.43	13329	157	126	14	[Ccl2 - chemokine (c-c motif) ligand 2, C3ar1 - complement component 3a receptor 1, Lgals3 - lectin, galactose binding, soluble 3, Icam1 - intercellular adhesion molecule 1, Il1r1 - interleukin 1 receptor, type i, Cd99 - cd99 antigen, Cxcl13 - chemokine (c-x-c motif) ligand 13, Cd9 - cd9 antigen, Apod - apolipoprotein d, Serpine1 - serine (or cysteine) peptidase inhibitor, clade e, member 1, Ecm1…
GO:0071216	cellular response to biotic stimulus	3.52e-10	1.43e-07	10.34	13329	133	126	13	[Ccl2 - chemokine (c-c motif) ligand 2, Vim - vimentin, Abca1 - atp-binding cassette, sub-family a (abc1), member 1, Zfp36 - zinc finger protein 36, Cd274 - cd274 antigen, Cd180 - cd180 antigen, Cxcl13 - chemokine (c-x-c motif) ligand 13, Serpine1 - serine (or cysteine) peptidase inhibitor, clade e, member 1, Cxcl10 - chemokine (c-x-c motif) ligand 10, Gch1 - gtp cyclohydrolase 1, Fcgr4 - fc rece…
GO:0040012	regulation of locomotion	8.57e-10	3.4e-07	3.63	13329	845	126	29	[Hgf - hepatocyte growth factor, Itga5 - integrin alpha 5 (fibronectin receptor alpha), Icam1 - intercellular adhesion molecule 1, Il1r1 - interleukin 1 receptor, type i, Cd99 - cd99 antigen, Cd274 - cd274 antigen, Cxcl13 - chemokine (c-x-c motif) ligand 13, Flna - filamin, alpha, Cd9 - cd9 antigen, Mmp2 - matrix metallopeptidase 2, Mcam - melanoma cell adhesion molecule, Apod - apolipoprotein d,…
GO:0051270	regulation of cellular component movement	9.05e-10	3.49e-07	3.62	13329	847	126	29	[Hgf - hepatocyte growth factor, Itga5 - integrin alpha 5 (fibronectin receptor alpha), Icam1 - intercellular adhesion molecule 1, Il1r1 - interleukin 1 receptor, type i, Cd99 - cd99 antigen, Cd274 - cd274 antigen, Cxcl13 - chemokine (c-x-c motif) ligand 13, Flna - filamin, alpha, Cd9 - cd9 antigen, Mmp2 - matrix metallopeptidase 2, Mcam - melanoma cell adhesion molecule, Apod - apolipoprotein d,…
GO:0001819	positive regulation of cytokine production	1.35e-09	5.09e-07	5.9	13329	323	126	18	[Ccl2 - chemokine (c-c motif) ligand 2, C3ar1 - complement component 3a receptor 1, Hgf - hepatocyte growth factor, AF251705 - cdna sequence af251705, Casp4 - caspase 4, apoptosis-related cysteine peptidase, Cyba - cytochrome b-245, alpha polypeptide, Il1r1 - interleukin 1 receptor, type i, Cybb - cytochrome b-245, beta polypeptide, Crlf2 - cytokine receptor-like factor 2, Cd274 - cd274 antigen, …
GO:0042127	regulation of cell proliferation	1.5e-09	5.5e-07	3.02	13329	1227	126	35	[Cd44 - cd44 antigen, Crlf2 - cytokine receptor-like factor 2, Cd274 - cd274 antigen, Fam129b - family with sequence similarity 129, member b, Sat1 - spermidine/spermine n1-acetyl transferase 1, Flna - filamin, alpha, Mmp2 - matrix metallopeptidase 2, Atf3 - activating transcription factor 3, Cd9 - cd9 antigen, Apod - apolipoprotein d, Ecm1 - extracellular matrix protein 1, Timp2 - tissue inhibit…
GO:0050776	regulation of immune response	3.39e-09	1.21e-06	4.45	13329	523	126	22	[C3ar1 - complement component 3a receptor 1, Lgals3 - lectin, galactose binding, soluble 3, Cd44 - cd44 antigen, Il1r1 - interleukin 1 receptor, type i, Trim30a - tripartite motif-containing 30a, Cyba - cytochrome b-245, alpha polypeptide, C1qa - complement component 1, q subcomponent, alpha polypeptide, H2-L - histocompatibility 2, d region locus l, Cd274 - cd274 antigen, Fgl2 - fibrinogen-like …
GO:0070887	cellular response to chemical stimulus	3.5e-09	1.22e-06	2.92	13329	1267	126	35	[Crip1 - cysteine-rich protein 1 (intestinal), Hgf - hepatocyte growth factor, Abca1 - atp-binding cassette, sub-family a (abc1), member 1, Cd44 - cd44 antigen, Icam1 - intercellular adhesion molecule 1, Capg - capping protein (actin filament), gelsolin-like, Cd274 - cd274 antigen, Cd180 - cd180 antigen, Cxcl13 - chemokine (c-x-c motif) ligand 13, Mmp2 - matrix metallopeptidase 2, Ifit1 - interfe…
GO:0032101	regulation of response to external stimulus	4.83e-09	1.65e-06	4.17	13329	583	126	23	[Ccl2 - chemokine (c-c motif) ligand 2, C3ar1 - complement component 3a receptor 1, Usp18 - ubiquitin specific peptidase 18, Hgf - hepatocyte growth factor, Cd44 - cd44 antigen, Casp4 - caspase 4, apoptosis-related cysteine peptidase, Il1r1 - interleukin 1 receptor, type i, Zfp36 - zinc finger protein 36, Cyba - cytochrome b-245, alpha polypeptide, Cst7 - cystatin f (leukocystatin), Fgl2 - fibrin…
GO:0002687	positive regulation of leukocyte migration	6.08e-09	2.03e-06	10.68	13329	109	126	11	[Ccl2 - chemokine (c-c motif) ligand 2, Cxcl13 - chemokine (c-x-c motif) ligand 13, Lgals3 - lectin, galactose binding, soluble 3, C3ar1 - complement component 3a receptor 1, Serpine1 - serine (or cysteine) peptidase inhibitor, clade e, member 1, Cxcl10 - chemokine (c-x-c motif) ligand 10, Icam1 - intercellular adhesion molecule 1, Il1r1 - interleukin 1 receptor, type i, Tlr2 - toll-like receptor…
GO:0071310	cellular response to organic substance	1.59e-08	5.19e-06	3.11	13329	1022	126	30	[Hgf - hepatocyte growth factor, Abca1 - atp-binding cassette, sub-family a (abc1), member 1, Cd44 - cd44 antigen, Icam1 - intercellular adhesion molecule 1, Capg - capping protein (actin filament), gelsolin-like, Cd274 - cd274 antigen, Cd180 - cd180 antigen, Cxcl13 - chemokine (c-x-c motif) ligand 13, Ifit1 - interferon-induced protein with tetratricopeptide repeats 1, Mmp2 - matrix metallopepti…
GO:0031347	regulation of defense response	1.69e-08	5.4e-06	4.48	13329	472	126	20	[Usp18 - ubiquitin specific peptidase 18, Hgf - hepatocyte growth factor, Cd44 - cd44 antigen, Casp4 - caspase 4, apoptosis-related cysteine peptidase, Il1r1 - interleukin 1 receptor, type i, Trim30a - tripartite motif-containing 30a, Zfp36 - zinc finger protein 36, Cyba - cytochrome b-245, alpha polypeptide, Cst7 - cystatin f (leukocystatin), Fgl2 - fibrinogen-like protein 2, Lag3 - lymphocyte-a…
GO:0002237	response to molecule of bacterial origin	2.45e-08	7.65e-06	7.31	13329	188	126	13	[Ccl2 - chemokine (c-c motif) ligand 2, Vim - vimentin, Abca1 - atp-binding cassette, sub-family a (abc1), member 1, Zfp36 - zinc finger protein 36, Cd274 - cd274 antigen, Cd180 - cd180 antigen, Cxcl13 - chemokine (c-x-c motif) ligand 13, Serpine1 - serine (or cysteine) peptidase inhibitor, clade e, member 1, Cxcl10 - chemokine (c-x-c motif) ligand 10, Gch1 - gtp cyclohydrolase 1, Fcgr4 - fc rece…
GO:0030155	regulation of cell adhesion	4.9e-08	1.5e-05	4.01	13329	554	126	21	[Ccl2 - chemokine (c-c motif) ligand 2, Lgals3 - lectin, galactose binding, soluble 3, Cd44 - cd44 antigen, Itga5 - integrin alpha 5 (fibronectin receptor alpha), Icam1 - intercellular adhesion molecule 1, Cd274 - cd274 antigen, Fgl2 - fibrinogen-like protein 2, Flna - filamin, alpha, Lag3 - lymphocyte-activation gene 3, Plau - plasminogen activator, urokinase, Cxcl13 - chemokine (c-x-c motif) li…
GO:0033993	response to lipid	5.77e-08	1.73e-05	4.63	13329	411	126	18	[Ccl2 - chemokine (c-c motif) ligand 2, Vim - vimentin, Abca1 - atp-binding cassette, sub-family a (abc1), member 1, Zfp36 - zinc finger protein 36, Cd274 - cd274 antigen, Cdo1 - cysteine dioxygenase 1, cytosolic, Cd180 - cd180 antigen, Cxcl13 - chemokine (c-x-c motif) ligand 13, Mmp2 - matrix metallopeptidase 2, Serpine1 - serine (or cysteine) peptidase inhibitor, clade e, member 1, Cxcl10 - che…
GO:0045765	regulation of angiogenesis	6.59e-08	1.93e-05	6.12	13329	242	126	14	[Ccl2 - chemokine (c-c motif) ligand 2, Itgax - integrin alpha x, C3ar1 - complement component 3a receptor 1, Htatip2 - hiv-1 tat interactive protein 2, homolog (human), Lgals3 - lectin, galactose binding, soluble 3, Hgf - hepatocyte growth factor, Itga5 - integrin alpha 5 (fibronectin receptor alpha), S100a1 - s100 calcium binding protein a1, Cybb - cytochrome b-245, beta polypeptide, Hmox1 - he…
GO:0032496	response to lipopolysaccharide	6.94e-08	2e-05	7.47	13329	170	126	12	[Ccl2 - chemokine (c-c motif) ligand 2, Cxcl13 - chemokine (c-x-c motif) ligand 13, Vim - vimentin, Abca1 - atp-binding cassette, sub-family a (abc1), member 1, Serpine1 - serine (or cysteine) peptidase inhibitor, clade e, member 1, Cxcl10 - chemokine (c-x-c motif) ligand 10, Zfp36 - zinc finger protein 36, Fcgr4 - fc receptor, igg, low affinity iv, Gch1 - gtp cyclohydrolase 1, Cd274 - cd274 anti…
GO:0048583	regulation of response to stimulus	7.8e-08	2.2e-05	1.97	13329	2897	126	54	[Hgf - hepatocyte growth factor, Abca1 - atp-binding cassette, sub-family a (abc1), member 1, Cd44 - cd44 antigen, Il1r1 - interleukin 1 receptor, type i, Crlf2 - cytokine receptor-like factor 2, Flna - filamin, alpha, Mmp2 - matrix metallopeptidase 2, Cd9 - cd9 antigen, 5430435G22Rik - riken cdna 5430435g22 gene, Apod - apolipoprotein d, Timp2 - tissue inhibitor of metalloproteinase 2, H2-Q4 - h…
GO:0071396	cellular response to lipid	8.08e-08	2.24e-05	6.02	13329	246	126	14	[Ccl2 - chemokine (c-c motif) ligand 2, Vim - vimentin, Abca1 - atp-binding cassette, sub-family a (abc1), member 1, Zfp36 - zinc finger protein 36, Cd274 - cd274 antigen, Cd180 - cd180 antigen, Cxcl13 - chemokine (c-x-c motif) ligand 13, Mmp2 - matrix metallopeptidase 2, Serpine1 - serine (or cysteine) peptidase inhibitor, clade e, member 1, Cxcl10 - chemokine (c-x-c motif) ligand 10, Spp1 - sec…
GO:0034341	response to interferon-gamma	8.25e-08	2.24e-05	11.47	13329	83	126	9	[Ccl2 - chemokine (c-c motif) ligand 2, Vim - vimentin, 5430435G22Rik - riken cdna 5430435g22 gene, Ifitm3 - interferon induced transmembrane protein 3, Irgm1 - immunity-related gtpase family m member 1, Bst2 - bone marrow stromal cell antigen 2, Capg - capping protein (actin filament), gelsolin-like, Tlr2 - toll-like receptor 2, Gch1 - gtp cyclohydrolase 1]
GO:0045766	positive regulation of angiogenesis	9.71e-08	2.59e-05	8.19	13329	142	126	11	[Itgax - integrin alpha x, Lgals3 - lectin, galactose binding, soluble 3, C3ar1 - complement component 3a receptor 1, Hgf - hepatocyte growth factor, Ecm1 - extracellular matrix protein 1, Serpine1 - serine (or cysteine) peptidase inhibitor, clade e, member 1, Itga5 - integrin alpha 5 (fibronectin receptor alpha), S100a1 - s100 calcium binding protein a1, Cybb - cytochrome b-245, beta polypeptide…
GO:0060760	positive regulation of response to cytokine stimulus	1.63e-07	4.28e-05	16.83	13329	44	126	7	[Parp9 - poly (adp-ribose) polymerase family, member 9, Irgm1 - immunity-related gtpase family m member 1, Casp4 - caspase 4, apoptosis-related cysteine peptidase, Il1r1 - interleukin 1 receptor, type i, Tlr2 - toll-like receptor 2, Csf1 - colony stimulating factor 1 (macrophage), Irf7 - interferon regulatory factor 7]
GO:0043900	regulation of multi-organism process	1.68e-07	4.33e-05	5.24	13329	303	126	15	[Mdfic - myod family inhibitor domain containing, Bst2 - bone marrow stromal cell antigen 2, Zfp36 - zinc finger protein 36, Trim30a - tripartite motif-containing 30a, Cyba - cytochrome b-245, alpha polypeptide, Fgl2 - fibrinogen-like protein 2, Cd180 - cd180 antigen, Plau - plasminogen activator, urokinase, Parp9 - poly (adp-ribose) polymerase family, member 9, Isg15 - isg15 ubiquitin-like modif…
GO:0048584	positive regulation of response to stimulus	1.71e-07	4.33e-05	2.42	13329	1619	126	37	[Hgf - hepatocyte growth factor, Cd44 - cd44 antigen, Mdfic - myod family inhibitor domain containing, Icam1 - intercellular adhesion molecule 1, Il1r1 - interleukin 1 receptor, type i, Crlf2 - cytokine receptor-like factor 2, Cd274 - cd274 antigen, Cd180 - cd180 antigen, Lag3 - lymphocyte-activation gene 3, Flna - filamin, alpha, Cxcl13 - chemokine (c-x-c motif) ligand 13, Mmp2 - matrix metallop…
GO:0051241	negative regulation of multicellular organismal process	2.09e-07	5.2e-05	2.91	13329	1018	126	28	[Anxa4 - annexin a4, Hgf - hepatocyte growth factor, Cd44 - cd44 antigen, Trim30a - tripartite motif-containing 30a, Cd274 - cd274 antigen, Fgl2 - fibrinogen-like protein 2, Flna - filamin, alpha, Lag3 - lymphocyte-activation gene 3, Cxcl13 - chemokine (c-x-c motif) ligand 13, Cd9 - cd9 antigen, Mmp2 - matrix metallopeptidase 2, Apod - apolipoprotein d, Ecm1 - extracellular matrix protein 1, Cxcl…
GO:2000026	regulation of multicellular organismal development	2.13e-07	5.21e-05	2.36	13329	1706	126	38	[Htatip2 - hiv-1 tat interactive protein 2, homolog (human), Hgf - hepatocyte growth factor, Cd44 - cd44 antigen, Itga5 - integrin alpha 5 (fibronectin receptor alpha), Il1r1 - interleukin 1 receptor, type i, Cst7 - cystatin f (leukocystatin), Cd274 - cd274 antigen, Fgl2 - fibrinogen-like protein 2, Lag3 - lymphocyte-activation gene 3, Flna - filamin, alpha, Isg15 - isg15 ubiquitin-like modifier,…
GO:0007165	signal transduction	2.74e-07	6.59e-05	2.01	13329	2583	126	49	[Crip1 - cysteine-rich protein 1 (intestinal), Hgf - hepatocyte growth factor, Abca1 - atp-binding cassette, sub-family a (abc1), member 1, Cd44 - cd44 antigen, Il1r1 - interleukin 1 receptor, type i, Crlf2 - cytokine receptor-like factor 2, Flna - filamin, alpha, 5430435G22Rik - riken cdna 5430435g22 gene, Mt1 - metallothionein 1, Shisa5 - shisa homolog 5 (xenopus laevis), Tpcn2 - two pore segme…
GO:1901342	regulation of vasculature development	2.78e-07	6.58e-05	5.44	13329	272	126	14	[Ccl2 - chemokine (c-c motif) ligand 2, Itgax - integrin alpha x, C3ar1 - complement component 3a receptor 1, Htatip2 - hiv-1 tat interactive protein 2, homolog (human), Lgals3 - lectin, galactose binding, soluble 3, Hgf - hepatocyte growth factor, Itga5 - integrin alpha 5 (fibronectin receptor alpha), S100a1 - s100 calcium binding protein a1, Cybb - cytochrome b-245, beta polypeptide, Hmox1 - he…
GO:0009611	response to wounding	3.04e-07	7.07e-05	8.4	13329	126	126	10	[Ccl2 - chemokine (c-c motif) ligand 2, Plau - plasminogen activator, urokinase, Mmp2 - matrix metallopeptidase 2, Cd44 - cd44 antigen, Gfap - glial fibrillary acidic protein, Lox - lysyl oxidase, Zfp36 - zinc finger protein 36, Sulf2 - sulfatase 2, Hmox1 - heme oxygenase (decycling) 1, Tyrobp - tyro protein tyrosine kinase binding protein]
GO:1904018	positive regulation of vasculature development	3.07e-07	7.04e-05	7.32	13329	159	126	11	[Itgax - integrin alpha x, C3ar1 - complement component 3a receptor 1, Lgals3 - lectin, galactose binding, soluble 3, Hgf - hepatocyte growth factor, Ecm1 - extracellular matrix protein 1, Serpine1 - serine (or cysteine) peptidase inhibitor, clade e, member 1, Itga5 - integrin alpha 5 (fibronectin receptor alpha), S100a1 - s100 calcium binding protein a1, Cybb - cytochrome b-245, beta polypeptide…
GO:0051716	cellular response to stimulus	3.14e-07	7.08e-05	2.15	13329	2112	126	43	[Crip1 - cysteine-rich protein 1 (intestinal), Hgf - hepatocyte growth factor, Abca1 - atp-binding cassette, sub-family a (abc1), member 1, Cd44 - cd44 antigen, Icam1 - intercellular adhesion molecule 1, Capg - capping protein (actin filament), gelsolin-like, Cd274 - cd274 antigen, Cd180 - cd180 antigen, Cxcl13 - chemokine (c-x-c motif) ligand 13, Mmp2 - matrix metallopeptidase 2, Ifit1 - interfe…
GO:0001818	negative regulation of cytokine production	3.47e-07	7.72e-05	6.44	13329	197	126	12	[Lag3 - lymphocyte-activation gene 3, Anxa4 - annexin a4, Hgf - hepatocyte growth factor, Apod - apolipoprotein d, Trim30a - tripartite motif-containing 30a, Zfp36 - zinc finger protein 36, Tlr2 - toll-like receptor 2, Cd274 - cd274 antigen, Srgn - serglycin, Gpnmb - glycoprotein (transmembrane) nmb, Hmox1 - heme oxygenase (decycling) 1, Tyrobp - tyro protein tyrosine kinase binding protein]
GO:0050793	regulation of developmental process	3.49e-07	7.65e-05	2.15	13329	2120	126	43	[Htatip2 - hiv-1 tat interactive protein 2, homolog (human), Hgf - hepatocyte growth factor, Cd44 - cd44 antigen, Itga5 - integrin alpha 5 (fibronectin receptor alpha), Icam1 - intercellular adhesion molecule 1, Il1r1 - interleukin 1 receptor, type i, Cst7 - cystatin f (leukocystatin), Cd274 - cd274 antigen, Fgl2 - fibrinogen-like protein 2, Lag3 - lymphocyte-activation gene 3, Flna - filamin, al…
GO:0080134	regulation of response to stress	4.43e-07	9.57e-05	2.8	13329	1056	126	28	[Hgf - hepatocyte growth factor, Cd44 - cd44 antigen, Mdfic - myod family inhibitor domain containing, Il1r1 - interleukin 1 receptor, type i, Trim30a - tripartite motif-containing 30a, Cst7 - cystatin f (leukocystatin), Fgl2 - fibrinogen-like protein 2, Lag3 - lymphocyte-activation gene 3, Cd9 - cd9 antigen, Mmp2 - matrix metallopeptidase 2, 5430435G22Rik - riken cdna 5430435g22 gene, Apod - apo…
GO:1901700	response to oxygen-containing compound	4.77e-07	0.000101	3.04	13329	870	126	25	[Abca1 - atp-binding cassette, sub-family a (abc1), member 1, Icam1 - intercellular adhesion molecule 1, Cd274 - cd274 antigen, Cdo1 - cysteine dioxygenase 1, cytosolic, Cd180 - cd180 antigen, Cxcl13 - chemokine (c-x-c motif) ligand 13, Mmp2 - matrix metallopeptidase 2, Apod - apolipoprotein d, Serpina3n - serine (or cysteine) peptidase inhibitor, clade a, member 3n, Cxcl10 - chemokine (c-x-c mot…
GO:0048518	positive regulation of biological process	5.23e-07	0.000109	1.63	13329	4534	126	70	[Hgf - hepatocyte growth factor, Abca1 - atp-binding cassette, sub-family a (abc1), member 1, Cd44 - cd44 antigen, Il1r1 - interleukin 1 receptor, type i, Crlf2 - cytokine receptor-like factor 2, Cd99 - cd99 antigen, Fam129b - family with sequence similarity 129, member b, Flna - filamin, alpha, Mmp2 - matrix metallopeptidase 2, 5430435G22Rik - riken cdna 5430435g22 gene, Mcam - melanoma cell adh…
GO:0022603	regulation of anatomical structure morphogenesis	6.7e-07	0.000138	2.98	13329	886	126	25	[Htatip2 - hiv-1 tat interactive protein 2, homolog (human), Hgf - hepatocyte growth factor, Cd44 - cd44 antigen, Itga5 - integrin alpha 5 (fibronectin receptor alpha), Icam1 - intercellular adhesion molecule 1, Flna - filamin, alpha, Ecm1 - extracellular matrix protein 1, Cxcl10 - chemokine (c-x-c motif) ligand 10, Ctsh - cathepsin h, Csf1 - colony stimulating factor 1 (macrophage), Ccl2 - chemo…
GO:0050778	positive regulation of immune response	1.18e-06	0.00024	4.5	13329	353	126	15	[C3ar1 - complement component 3a receptor 1, Cd44 - cd44 antigen, Cyba - cytochrome b-245, alpha polypeptide, Il1r1 - interleukin 1 receptor, type i, H2-L - histocompatibility 2, d region locus l, C1qa - complement component 1, q subcomponent, alpha polypeptide, Cd274 - cd274 antigen, Lag3 - lymphocyte-activation gene 3, Parp9 - poly (adp-ribose) polymerase family, member 9, Mmp2 - matrix metallo…
GO:0050789	regulation of biological process	1.27e-06	0.000256	1.36	13329	7541	126	97	[Abca1 - atp-binding cassette, sub-family a (abc1), member 1, Capg - capping protein (actin filament), gelsolin-like, Fam129b - family with sequence similarity 129, member b, Flna - filamin, alpha, Apod - apolipoprotein d, H2-Q4 - histocompatibility 2, q region locus 4, Mt1 - metallothionein 1, Gch1 - gtp cyclohydrolase 1, Tpcn2 - two pore segment channel 2, Mt2 - metallothionein 2, Zfp36 - zinc …
GO:0001525	angiogenesis	1.36e-06	0.00027	5.67	13329	224	126	12	[Plau - plasminogen activator, urokinase, Flna - filamin, alpha, Ccl2 - chemokine (c-c motif) ligand 2, Mmp2 - matrix metallopeptidase 2, Htatip2 - hiv-1 tat interactive protein 2, homolog (human), Mcam - melanoma cell adhesion molecule, Cspg4 - chondroitin sulfate proteoglycan 4, Ecm1 - extracellular matrix protein 1, Mmp19 - matrix metallopeptidase 19, Tnfaip2 - tumor necrosis factor, alpha-ind…
GO:1902041	regulation of extrinsic apoptotic signaling pathway via death domain receptors	1.36e-06	0.000267	16.7	13329	38	126	6	[Lgals3 - lectin, galactose binding, soluble 3, Atf3 - activating transcription factor 3, Hgf - hepatocyte growth factor, Serpine1 - serine (or cysteine) peptidase inhibitor, clade e, member 1, Icam1 - intercellular adhesion molecule 1, Hmox1 - heme oxygenase (decycling) 1]
GO:0001961	positive regulation of cytokine-mediated signaling pathway	1.6e-06	0.000309	16.27	13329	39	126	6	[Parp9 - poly (adp-ribose) polymerase family, member 9, Irgm1 - immunity-related gtpase family m member 1, Casp4 - caspase 4, apoptosis-related cysteine peptidase, Il1r1 - interleukin 1 receptor, type i, Irf7 - interferon regulatory factor 7, Csf1 - colony stimulating factor 1 (macrophage)]
GO:0050866	negative regulation of cell activation	1.94e-06	0.000369	6.87	13329	154	126	10	[Lag3 - lymphocyte-activation gene 3, Lgals3 - lectin, galactose binding, soluble 3, Cd9 - cd9 antigen, Cd44 - cd44 antigen, Cd274 - cd274 antigen, Cst7 - cystatin f (leukocystatin), Fgl2 - fibrinogen-like protein 2, Gpnmb - glycoprotein (transmembrane) nmb, Hmox1 - heme oxygenase (decycling) 1, Tyrobp - tyro protein tyrosine kinase binding protein]
GO:1901701	cellular response to oxygen-containing compound	1.97e-06	0.000371	3.48	13329	578	126	19	[Ccl2 - chemokine (c-c motif) ligand 2, Sgk1 - serum/glucocorticoid regulated kinase 1, Vim - vimentin, Abca1 - atp-binding cassette, sub-family a (abc1), member 1, Icam1 - intercellular adhesion molecule 1, Casp4 - caspase 4, apoptosis-related cysteine peptidase, Zfp36 - zinc finger protein 36, Cd274 - cd274 antigen, Cd180 - cd180 antigen, Cxcl13 - chemokine (c-x-c motif) ligand 13, Mmp2 - matri…
GO:0008284	positive regulation of cell proliferation	2.42e-06	0.000449	3.16	13329	702	126	21	[Itgax - integrin alpha x, Ccl2 - chemokine (c-c motif) ligand 2, C3ar1 - complement component 3a receptor 1, Lgals3 - lectin, galactose binding, soluble 3, Vim - vimentin, Cyba - cytochrome b-245, alpha polypeptide, Crlf2 - cytokine receptor-like factor 2, Cd274 - cd274 antigen, Hmox1 - heme oxygenase (decycling) 1, Flna - filamin, alpha, Plau - plasminogen activator, urokinase, Atf3 - activatin…
GO:0071675	regulation of mononuclear cell migration	2.51e-06	0.000461	15.11	13329	42	126	6	[Ccl2 - chemokine (c-c motif) ligand 2, C3ar1 - complement component 3a receptor 1, Lgals3 - lectin, galactose binding, soluble 3, Serpine1 - serine (or cysteine) peptidase inhibitor, clade e, member 1, Cxcl10 - chemokine (c-x-c motif) ligand 10, Csf1 - colony stimulating factor 1 (macrophage)]
GO:2000097	regulation of smooth muscle cell-matrix adhesion	3.28e-06	0.000593	79.34	13329	4	126	3	[Plau - plasminogen activator, urokinase, Apod - apolipoprotein d, Serpine1 - serine (or cysteine) peptidase inhibitor, clade e, member 1]
GO:0065009	regulation of molecular function	3.73e-06	0.000667	2.07	13329	1990	126	39	[Anxa4 - annexin a4, Hgf - hepatocyte growth factor, Cd44 - cd44 antigen, Mdfic - myod family inhibitor domain containing, Icam1 - intercellular adhesion molecule 1, Ctsb - cathepsin b, Fam129b - family with sequence similarity 129, member b, Cst7 - cystatin f (leukocystatin), Flna - filamin, alpha, Cxcl13 - chemokine (c-x-c motif) ligand 13, 5430435G22Rik - riken cdna 5430435g22 gene, Serpina3n …
GO:0065007	biological regulation	4.33e-06	0.000765	1.32	13329	7936	126	99	[Abca1 - atp-binding cassette, sub-family a (abc1), member 1, Capg - capping protein (actin filament), gelsolin-like, Fam129b - family with sequence similarity 129, member b, Flna - filamin, alpha, Apod - apolipoprotein d, H2-Q4 - histocompatibility 2, q region locus 4, Mt1 - metallothionein 1, Gch1 - gtp cyclohydrolase 1, Tpcn2 - two pore segment channel 2, Mt2 - metallothionein 2, Zfp36 - zinc …
GO:1903555	regulation of tumor necrosis factor superfamily cytokine production	4.59e-06	0.000802	7.16	13329	133	126	9	[Ccl2 - chemokine (c-c motif) ligand 2, Cyba - cytochrome b-245, alpha polypeptide, Trim30a - tripartite motif-containing 30a, Zfp36 - zinc finger protein 36, Cybb - cytochrome b-245, beta polypeptide, Tlr2 - toll-like receptor 2, Cd274 - cd274 antigen, Gpnmb - glycoprotein (transmembrane) nmb, Tyrobp - tyro protein tyrosine kinase binding protein]
GO:0016477	cell migration	4.88e-06	0.000843	3.27	13329	615	126	19	[Ccl2 - chemokine (c-c motif) ligand 2, Lgals3 - lectin, galactose binding, soluble 3, Hgf - hepatocyte growth factor, Sgpl1 - sphingosine phosphate lyase 1, Cd44 - cd44 antigen, Icam1 - intercellular adhesion molecule 1, Cd99 - cd99 antigen, Flna - filamin, alpha, Cxcl13 - chemokine (c-x-c motif) ligand 13, Plau - plasminogen activator, urokinase, Mmp2 - matrix metallopeptidase 2, Rhoc - ras hom…
GO:0060759	regulation of response to cytokine stimulus	4.94e-06	0.000843	8.38	13329	101	126	8	[Parp9 - poly (adp-ribose) polymerase family, member 9, Ecm1 - extracellular matrix protein 1, Irgm1 - immunity-related gtpase family m member 1, Casp4 - caspase 4, apoptosis-related cysteine peptidase, Il1r1 - interleukin 1 receptor, type i, Tlr2 - toll-like receptor 2, Csf1 - colony stimulating factor 1 (macrophage), Irf7 - interferon regulatory factor 7]
GO:0071345	cellular response to cytokine stimulus	5e-06	0.000842	4.27	13329	347	126	14	[Ccl2 - chemokine (c-c motif) ligand 2, Vim - vimentin, Gm4951 - predicted gene 4951, Icam1 - intercellular adhesion molecule 1, Zfp36 - zinc finger protein 36, Capg - capping protein (actin filament), gelsolin-like, Ifit2 - interferon-induced protein with tetratricopeptide repeats 2, Ifit1 - interferon-induced protein with tetratricopeptide repeats 1, 5430435G22Rik - riken cdna 5430435g22 gene, …
GO:0002695	negative regulation of leukocyte activation	5.86e-06	0.000977	6.95	13329	137	126	9	[Lag3 - lymphocyte-activation gene 3, Lgals3 - lectin, galactose binding, soluble 3, Cd44 - cd44 antigen, Cd274 - cd274 antigen, Cst7 - cystatin f (leukocystatin), Fgl2 - fibrinogen-like protein 2, Gpnmb - glycoprotein (transmembrane) nmb, Hmox1 - heme oxygenase (decycling) 1, Tyrobp - tyro protein tyrosine kinase binding protein]
GO:0032102	negative regulation of response to external stimulus	6.14e-06	0.00101	4.9	13329	259	126	12	[Plau - plasminogen activator, urokinase, Cxcl13 - chemokine (c-x-c motif) ligand 13, Cd9 - cd9 antigen, Hgf - hepatocyte growth factor, Apod - apolipoprotein d, Serpine1 - serine (or cysteine) peptidase inhibitor, clade e, member 1, Cd44 - cd44 antigen, Cdkn1a - cyclin-dependent kinase inhibitor 1a (p21), Zfp36 - zinc finger protein 36, Cst7 - cystatin f (leukocystatin), Fgl2 - fibrinogen-like p…
GO:0048519	negative regulation of biological process	6.55e-06	0.00107	1.63	13329	3951	126	61	[Hgf - hepatocyte growth factor, Cd44 - cd44 antigen, Capg - capping protein (actin filament), gelsolin-like, Fam129b - family with sequence similarity 129, member b, Flna - filamin, alpha, Cd9 - cd9 antigen, Mmp2 - matrix metallopeptidase 2, 5430435G22Rik - riken cdna 5430435g22 gene, Apod - apolipoprotein d, Serpina3n - serine (or cysteine) peptidase inhibitor, clade a, member 3n, Timp2 - tissu…
GO:0002683	negative regulation of immune system process	6.7e-06	0.00108	4.16	13329	356	126	14	[Lgals3 - lectin, galactose binding, soluble 3, Cd44 - cd44 antigen, Zfp36 - zinc finger protein 36, Trim30a - tripartite motif-containing 30a, Cst7 - cystatin f (leukocystatin), Cd274 - cd274 antigen, Fgl2 - fibrinogen-like protein 2, Hmox1 - heme oxygenase (decycling) 1, Lag3 - lymphocyte-activation gene 3, 5430435G22Rik - riken cdna 5430435g22 gene, Apod - apolipoprotein d, Cd68 - cd68 antigen…
GO:0072683	T cell extravasation	8.14e-06	0.0013	63.47	13329	5	126	3	[Ccl2 - chemokine (c-c motif) ligand 2, Icam1 - intercellular adhesion molecule 1, Cd99 - cd99 antigen]
GO:0048522	positive regulation of cellular process	9.84e-06	0.00155	1.6	13329	4092	126	62	[Hgf - hepatocyte growth factor, Abca1 - atp-binding cassette, sub-family a (abc1), member 1, Cd44 - cd44 antigen, Il1r1 - interleukin 1 receptor, type i, Crlf2 - cytokine receptor-like factor 2, Cd99 - cd99 antigen, Fam129b - family with sequence similarity 129, member b, Flna - filamin, alpha, Mmp2 - matrix metallopeptidase 2, 5430435G22Rik - riken cdna 5430435g22 gene, Mcam - melanoma cell adh…
GO:0023056	positive regulation of signaling	1e-05	0.00156	2.3	13329	1382	126	30	[Hgf - hepatocyte growth factor, Cd44 - cd44 antigen, Mdfic - myod family inhibitor domain containing, Icam1 - intercellular adhesion molecule 1, Il1r1 - interleukin 1 receptor, type i, Crlf2 - cytokine receptor-like factor 2, Cd180 - cd180 antigen, Flna - filamin, alpha, Atf3 - activating transcription factor 3, Irgm1 - immunity-related gtpase family m member 1, Timp2 - tissue inhibitor of metal…
GO:0034121	regulation of toll-like receptor signaling pathway	1.26e-05	0.00194	11.54	13329	55	126	6	[5430435G22Rik - riken cdna 5430435g22 gene, Cyba - cytochrome b-245, alpha polypeptide, Trim30a - tripartite motif-containing 30a, Tlr2 - toll-like receptor 2, Rsad2 - radical s-adenosyl methionine domain containing 2, Irf7 - interferon regulatory factor 7]
GO:0001906	cell killing	1.34e-05	0.00204	16.03	13329	33	126	5	[Ccl2 - chemokine (c-c motif) ligand 2, Cxcl13 - chemokine (c-x-c motif) ligand 13, Lgals3 - lectin, galactose binding, soluble 3, Cxcl10 - chemokine (c-x-c motif) ligand 10, Ctsh - cathepsin h]
GO:0010941	regulation of cell death	1.64e-05	0.00248	2.28	13329	1344	126	29	[Htatip2 - hiv-1 tat interactive protein 2, homolog (human), Hgf - hepatocyte growth factor, Cd44 - cd44 antigen, Itga5 - integrin alpha 5 (fibronectin receptor alpha), Icam1 - intercellular adhesion molecule 1, Ctsb - cathepsin b, Cd274 - cd274 antigen, Fam129b - family with sequence similarity 129, member b, Flna - filamin, alpha, Mmp2 - matrix metallopeptidase 2, Atf3 - activating transcriptio…
GO:0044364	disruption of cells of other organism	1.65e-05	0.00247	24.89	13329	17	126	4	[Cxcl13 - chemokine (c-x-c motif) ligand 13, Ccl2 - chemokine (c-c motif) ligand 2, Lgals3 - lectin, galactose binding, soluble 3, Cxcl10 - chemokine (c-x-c motif) ligand 10]
GO:0031640	killing of cells of other organism	1.65e-05	0.00244	24.89	13329	17	126	4	[Cxcl13 - chemokine (c-x-c motif) ligand 13, Ccl2 - chemokine (c-c motif) ligand 2, Lgals3 - lectin, galactose binding, soluble 3, Cxcl10 - chemokine (c-x-c motif) ligand 10]
GO:0035821	modification of morphology or physiology of other organism	1.65e-05	0.00242	8.61	13329	86	126	7	[Cxcl13 - chemokine (c-x-c motif) ligand 13, Ccl2 - chemokine (c-c motif) ligand 2, Lgals3 - lectin, galactose binding, soluble 3, Cxcl10 - chemokine (c-x-c motif) ligand 10, Mpeg1 - macrophage expressed gene 1, Tlr2 - toll-like receptor 2, Anxa2 - annexin a2]
GO:0043903	regulation of symbiosis, encompassing mutualism through parasitism	1.86e-05	0.0027	6.03	13329	158	126	9	[Isg15 - isg15 ubiquitin-like modifier, Ifitm3 - interferon induced transmembrane protein 3, Mdfic - myod family inhibitor domain containing, Oasl2 - 2'-5' oligoadenylate synthetase-like 2, Bst2 - bone marrow stromal cell antigen 2, Trim30a - tripartite motif-containing 30a, Zfp36 - zinc finger protein 36, Rsad2 - radical s-adenosyl methionine domain containing 2, Anxa2 - annexin a2]
GO:0048870	cell motility	1.91e-05	0.00274	2.97	13329	677	126	19	[Ccl2 - chemokine (c-c motif) ligand 2, Lgals3 - lectin, galactose binding, soluble 3, Hgf - hepatocyte growth factor, Sgpl1 - sphingosine phosphate lyase 1, Cd44 - cd44 antigen, Icam1 - intercellular adhesion molecule 1, Cd99 - cd99 antigen, Flna - filamin, alpha, Cxcl13 - chemokine (c-x-c motif) ligand 13, Plau - plasminogen activator, urokinase, Mmp2 - matrix metallopeptidase 2, Rhoc - ras hom…
GO:2000379	positive regulation of reactive oxygen species metabolic process	1.92e-05	0.00273	8.41	13329	88	126	7	[Plau - plasminogen activator, urokinase, Tmem106a - transmembrane protein 106a, Cdkn1a - cyclin-dependent kinase inhibitor 1a (p21), Icam1 - intercellular adhesion molecule 1, Cyba - cytochrome b-245, alpha polypeptide, Tlr2 - toll-like receptor 2, Tyrobp - tyro protein tyrosine kinase binding protein]
GO:0051094	positive regulation of developmental process	1.96e-05	0.00276	2.36	13329	1212	126	27	[Hgf - hepatocyte growth factor, Itga5 - integrin alpha 5 (fibronectin receptor alpha), Il1r1 - interleukin 1 receptor, type i, Cst7 - cystatin f (leukocystatin), Cd274 - cd274 antigen, Flna - filamin, alpha, 5430435G22Rik - riken cdna 5430435g22 gene, Isg15 - isg15 ubiquitin-like modifier, Ecm1 - extracellular matrix protein 1, Timp2 - tissue inhibitor of metalloproteinase 2, Ctsh - cathepsin h,…
GO:0009967	positive regulation of signal transduction	1.99e-05	0.00278	2.35	13329	1213	126	27	[Hgf - hepatocyte growth factor, Cd44 - cd44 antigen, Mdfic - myod family inhibitor domain containing, Icam1 - intercellular adhesion molecule 1, Il1r1 - interleukin 1 receptor, type i, Crlf2 - cytokine receptor-like factor 2, Cd180 - cd180 antigen, Flna - filamin, alpha, Atf3 - activating transcription factor 3, Irgm1 - immunity-related gtpase family m member 1, Pmaip1 - phorbol-12-myristate-13-…
GO:0035455	response to interferon-alpha	2.1e-05	0.00291	23.51	13329	18	126	4	[Ifit1 - interferon-induced protein with tetratricopeptide repeats 1, Ifitm3 - interferon induced transmembrane protein 3, Bst2 - bone marrow stromal cell antigen 2, Ifit2 - interferon-induced protein with tetratricopeptide repeats 2]
GO:0040011	locomotion	2.18e-05	0.00298	2.84	13329	746	126	20	[Ccl2 - chemokine (c-c motif) ligand 2, Lgals3 - lectin, galactose binding, soluble 3, C3ar1 - complement component 3a receptor 1, Hgf - hepatocyte growth factor, Sgpl1 - sphingosine phosphate lyase 1, Cd44 - cd44 antigen, Icam1 - intercellular adhesion molecule 1, Cd99 - cd99 antigen, Flna - filamin, alpha, Cxcl13 - chemokine (c-x-c motif) ligand 13, Plau - plasminogen activator, urokinase, Mmp2…
GO:0019221	cytokine-mediated signaling pathway	2.27e-05	0.00308	5.88	13329	162	126	9	[Ccl2 - chemokine (c-c motif) ligand 2, Cxcl13 - chemokine (c-x-c motif) ligand 13, Ifitm3 - interferon induced transmembrane protein 3, Cxcl10 - chemokine (c-x-c motif) ligand 10, Il1r1 - interleukin 1 receptor, type i, Crlf2 - cytokine receptor-like factor 2, Il3ra - interleukin 3 receptor, alpha chain, Csf1 - colony stimulating factor 1 (macrophage), Irf7 - interferon regulatory factor 7]
GO:0050794	regulation of cellular process	2.45e-05	0.00329	1.34	13329	7117	126	90	[Crip1 - cysteine-rich protein 1 (intestinal), Hgf - hepatocyte growth factor, Abca1 - atp-binding cassette, sub-family a (abc1), member 1, Cd44 - cd44 antigen, Il1r1 - interleukin 1 receptor, type i, Crlf2 - cytokine receptor-like factor 2, Capg - capping protein (actin filament), gelsolin-like, Cd99 - cd99 antigen, Fam129b - family with sequence similarity 129, member b, Sat1 - spermidine/sperm…
GO:0043901	negative regulation of multi-organism process	2.52e-05	0.00336	6.72	13329	126	126	8	[Isg15 - isg15 ubiquitin-like modifier, Ifitm3 - interferon induced transmembrane protein 3, Oasl2 - 2'-5' oligoadenylate synthetase-like 2, Bst2 - bone marrow stromal cell antigen 2, Zfp36 - zinc finger protein 36, Fgl2 - fibrinogen-like protein 2, Rsad2 - radical s-adenosyl methionine domain containing 2, Anxa2 - annexin a2]
GO:0010647	positive regulation of cell communication	2.52e-05	0.00334	2.23	13329	1375	126	29	[Hgf - hepatocyte growth factor, Cd44 - cd44 antigen, Mdfic - myod family inhibitor domain containing, Icam1 - intercellular adhesion molecule 1, Il1r1 - interleukin 1 receptor, type i, Crlf2 - cytokine receptor-like factor 2, Cd180 - cd180 antigen, Flna - filamin, alpha, Atf3 - activating transcription factor 3, Irgm1 - immunity-related gtpase family m member 1, Pmaip1 - phorbol-12-myristate-13-…
GO:0001959	regulation of cytokine-mediated signaling pathway	2.57e-05	0.00336	8.05	13329	92	126	7	[Parp9 - poly (adp-ribose) polymerase family, member 9, Ecm1 - extracellular matrix protein 1, Irgm1 - immunity-related gtpase family m member 1, Casp4 - caspase 4, apoptosis-related cysteine peptidase, Il1r1 - interleukin 1 receptor, type i, Csf1 - colony stimulating factor 1 (macrophage), Irf7 - interferon regulatory factor 7]
GO:0072676	lymphocyte migration	2.72e-05	0.00354	13.92	13329	38	126	5	[Ccl2 - chemokine (c-c motif) ligand 2, Cxcl13 - chemokine (c-x-c motif) ligand 13, Cxcl10 - chemokine (c-x-c motif) ligand 10, Icam1 - intercellular adhesion molecule 1, Cd99 - cd99 antigen]
GO:0035456	response to interferon-beta	2.72e-05	0.00351	13.92	13329	38	126	5	[Ifit1 - interferon-induced protein with tetratricopeptide repeats 1, Gm4951 - predicted gene 4951, Ifitm3 - interferon induced transmembrane protein 3, Irgm1 - immunity-related gtpase family m member 1, Bst2 - bone marrow stromal cell antigen 2]
GO:2000377	regulation of reactive oxygen species metabolic process	2.75e-05	0.00351	5.74	13329	166	126	9	[Plau - plasminogen activator, urokinase, Tmem106a - transmembrane protein 106a, Cdkn1a - cyclin-dependent kinase inhibitor 1a (p21), Icam1 - intercellular adhesion molecule 1, Cyba - cytochrome b-245, alpha polypeptide, Trim30a - tripartite motif-containing 30a, Tlr2 - toll-like receptor 2, Gch1 - gtp cyclohydrolase 1, Tyrobp - tyro protein tyrosine kinase binding protein]
GO:0002250	adaptive immune response	2.99e-05	0.00378	6.56	13329	129	126	8	[Lag3 - lymphocyte-activation gene 3, C3ar1 - complement component 3a receptor 1, Ly9 - lymphocyte antigen 9, Il18bp - interleukin 18 binding protein, Crlf2 - cytokine receptor-like factor 2, Ctsh - cathepsin h, Cd274 - cd274 antigen, Irf7 - interferon regulatory factor 7]
GO:0071677	positive regulation of mononuclear cell migration	3.28e-05	0.00411	21.16	13329	20	126	4	[Ccl2 - chemokine (c-c motif) ligand 2, Lgals3 - lectin, galactose binding, soluble 3, Serpine1 - serine (or cysteine) peptidase inhibitor, clade e, member 1, Cxcl10 - chemokine (c-x-c motif) ligand 10]
GO:0072678	T cell migration	3.28e-05	0.00408	21.16	13329	20	126	4	[Ccl2 - chemokine (c-c motif) ligand 2, Cxcl10 - chemokine (c-x-c motif) ligand 10, Icam1 - intercellular adhesion molecule 1, Cd99 - cd99 antigen]
GO:0032680	regulation of tumor necrosis factor production	3.34e-05	0.00412	6.46	13329	131	126	8	[Ccl2 - chemokine (c-c motif) ligand 2, Cyba - cytochrome b-245, alpha polypeptide, Trim30a - tripartite motif-containing 30a, Zfp36 - zinc finger protein 36, Cybb - cytochrome b-245, beta polypeptide, Tlr2 - toll-like receptor 2, Gpnmb - glycoprotein (transmembrane) nmb, Tyrobp - tyro protein tyrosine kinase binding protein]
GO:0001912	positive regulation of leukocyte mediated cytotoxicity	3.52e-05	0.0043	13.22	13329	40	126	5	[Ccl2 - chemokine (c-c motif) ligand 2, Lag3 - lymphocyte-activation gene 3, H2-Q4 - histocompatibility 2, q region locus 4, H2-L - histocompatibility 2, d region locus l, Tyrobp - tyro protein tyrosine kinase binding protein]
GO:0007166	cell surface receptor signaling pathway	3.59e-05	0.00435	2.33	13329	1182	126	26	[Anxa4 - annexin a4, Hgf - hepatocyte growth factor, Cd44 - cd44 antigen, Itga5 - integrin alpha 5 (fibronectin receptor alpha), Il1r1 - interleukin 1 receptor, type i, Crlf2 - cytokine receptor-like factor 2, Cd274 - cd274 antigen, Flna - filamin, alpha, Lag3 - lymphocyte-activation gene 3, Cxcl13 - chemokine (c-x-c motif) ligand 13, Isg15 - isg15 ubiquitin-like modifier, Cxcl10 - chemokine (c-x…
GO:0051049	regulation of transport	3.63e-05	0.00437	2.11	13329	1553	126	31	[Anxa4 - annexin a4, Abca1 - atp-binding cassette, sub-family a (abc1), member 1, AF251705 - cdna sequence af251705, Mdfic - myod family inhibitor domain containing, Icam1 - intercellular adhesion molecule 1, Bst2 - bone marrow stromal cell antigen 2, Crlf2 - cytokine receptor-like factor 2, Cd274 - cd274 antigen, Flna - filamin, alpha, Apod - apolipoprotein d, Pmaip1 - phorbol-12-myristate-13-ac…
GO:0048523	negative regulation of cellular process	3.72e-05	0.00443	1.62	13329	3593	126	55	[Hgf - hepatocyte growth factor, Cd44 - cd44 antigen, Capg - capping protein (actin filament), gelsolin-like, Fam129b - family with sequence similarity 129, member b, Flna - filamin, alpha, Cd9 - cd9 antigen, Mmp2 - matrix metallopeptidase 2, 5430435G22Rik - riken cdna 5430435g22 gene, Apod - apolipoprotein d, Serpina3n - serine (or cysteine) peptidase inhibitor, clade a, member 3n, Timp2 - tissu…
GO:0002690	positive regulation of leukocyte chemotaxis	3.94e-05	0.00466	9.47	13329	67	126	6	[Cxcl13 - chemokine (c-x-c motif) ligand 13, Ccl2 - chemokine (c-c motif) ligand 2, C3ar1 - complement component 3a receptor 1, Serpine1 - serine (or cysteine) peptidase inhibitor, clade e, member 1, Cxcl10 - chemokine (c-x-c motif) ligand 10, Csf1 - colony stimulating factor 1 (macrophage)]
GO:0030593	neutrophil chemotaxis	3.98e-05	0.00467	12.9	13329	41	126	5	[Ccl2 - chemokine (c-c motif) ligand 2, Cxcl13 - chemokine (c-x-c motif) ligand 13, Lgals3 - lectin, galactose binding, soluble 3, Cxcl10 - chemokine (c-x-c motif) ligand 10, Spp1 - secreted phosphoprotein 1]
GO:0071346	cellular response to interferon-gamma	4.29e-05	0.005	9.33	13329	68	126	6	[Ccl2 - chemokine (c-c motif) ligand 2, Vim - vimentin, 5430435G22Rik - riken cdna 5430435g22 gene, Irgm1 - immunity-related gtpase family m member 1, Capg - capping protein (actin filament), gelsolin-like, Tlr2 - toll-like receptor 2]
GO:0048646	anatomical structure formation involved in morphogenesis	4.86e-05	0.00561	3	13329	600	126	17	[Ccl2 - chemokine (c-c motif) ligand 2, Htatip2 - hiv-1 tat interactive protein 2, homolog (human), Cd44 - cd44 antigen, Mmp19 - matrix metallopeptidase 19, Hmox1 - heme oxygenase (decycling) 1, Flna - filamin, alpha, Plau - plasminogen activator, urokinase, Mmp2 - matrix metallopeptidase 2, Cd9 - cd9 antigen, Mcam - melanoma cell adhesion molecule, St14 - suppression of tumorigenicity 14 (colon …
GO:1902042	negative regulation of extrinsic apoptotic signaling pathway via death domain receptors	4.88e-05	0.00559	19.23	13329	22	126	4	[Hgf - hepatocyte growth factor, Serpine1 - serine (or cysteine) peptidase inhibitor, clade e, member 1, Icam1 - intercellular adhesion molecule 1, Hmox1 - heme oxygenase (decycling) 1]
GO:0045088	regulation of innate immune response	4.98e-05	0.00567	4.74	13329	223	126	10	[Lag3 - lymphocyte-activation gene 3, Parp9 - poly (adp-ribose) polymerase family, member 9, Mmp2 - matrix metallopeptidase 2, 5430435G22Rik - riken cdna 5430435g22 gene, Irgm1 - immunity-related gtpase family m member 1, Cyba - cytochrome b-245, alpha polypeptide, Trim30a - tripartite motif-containing 30a, Tlr2 - toll-like receptor 2, Rsad2 - radical s-adenosyl methionine domain containing 2, Ir…
GO:0045089	positive regulation of innate immune response	5.37e-05	0.00606	6.04	13329	140	126	8	[Lag3 - lymphocyte-activation gene 3, Parp9 - poly (adp-ribose) polymerase family, member 9, Mmp2 - matrix metallopeptidase 2, Irgm1 - immunity-related gtpase family m member 1, Cyba - cytochrome b-245, alpha polypeptide, Tlr2 - toll-like receptor 2, Rsad2 - radical s-adenosyl methionine domain containing 2, Irf7 - interferon regulatory factor 7]
GO:0010810	regulation of cell-substrate adhesion	5.42e-05	0.00607	5.26	13329	181	126	9	[Plau - plasminogen activator, urokinase, Flna - filamin, alpha, Apod - apolipoprotein d, Serpine1 - serine (or cysteine) peptidase inhibitor, clade e, member 1, Itga5 - integrin alpha 5 (fibronectin receptor alpha), Spp1 - secreted phosphoprotein 1, Fmn1 - formin 1, Iqgap1 - iq motif containing gtpase activating protein 1, Csf1 - colony stimulating factor 1 (macrophage)]
GO:0031099	regeneration	5.49e-05	0.0061	8.94	13329	71	126	6	[Plau - plasminogen activator, urokinase, Mmp2 - matrix metallopeptidase 2, Gfap - glial fibrillary acidic protein, Cdkn1a - cyclin-dependent kinase inhibitor 1a (p21), Sulf2 - sulfatase 2, Hmox1 - heme oxygenase (decycling) 1]
GO:0045071	negative regulation of viral genome replication	5.63e-05	0.00621	12.02	13329	44	126	5	[Isg15 - isg15 ubiquitin-like modifier, Ifitm3 - interferon induced transmembrane protein 3, Oasl2 - 2'-5' oligoadenylate synthetase-like 2, Bst2 - bone marrow stromal cell antigen 2, Rsad2 - radical s-adenosyl methionine domain containing 2]
GO:0061045	negative regulation of wound healing	5.63e-05	0.00617	12.02	13329	44	126	5	[Plau - plasminogen activator, urokinase, Cd9 - cd9 antigen, Serpine1 - serine (or cysteine) peptidase inhibitor, clade e, member 1, Cdkn1a - cyclin-dependent kinase inhibitor 1a (p21), Anxa2 - annexin a2]
GO:0002693	positive regulation of cellular extravasation	5.87e-05	0.00637	18.4	13329	23	126	4	[Ccl2 - chemokine (c-c motif) ligand 2, Icam1 - intercellular adhesion molecule 1, Il1r1 - interleukin 1 receptor, type i, Cd99 - cd99 antigen]
GO:0045785	positive regulation of cell adhesion	6.38e-05	0.00688	3.87	13329	328	126	12	[Flna - filamin, alpha, Ccl2 - chemokine (c-c motif) ligand 2, Cxcl13 - chemokine (c-x-c motif) ligand 13, Cd44 - cd44 antigen, Itga5 - integrin alpha 5 (fibronectin receptor alpha), Icam1 - intercellular adhesion molecule 1, Spp1 - secreted phosphoprotein 1, Fmn1 - formin 1, Cd274 - cd274 antigen, Iqgap1 - iq motif containing gtpase activating protein 1, Csf1 - colony stimulating factor 1 (macro…
GO:0007162	negative regulation of cell adhesion	6.46e-05	0.00692	4.6	13329	230	126	10	[Lag3 - lymphocyte-activation gene 3, Mmp2 - matrix metallopeptidase 2, Lgals3 - lectin, galactose binding, soluble 3, Cd9 - cd9 antigen, Apod - apolipoprotein d, Serpine1 - serine (or cysteine) peptidase inhibitor, clade e, member 1, Cd44 - cd44 antigen, Cd274 - cd274 antigen, Fgl2 - fibrinogen-like protein 2, Gpnmb - glycoprotein (transmembrane) nmb]
GO:0002697	regulation of immune effector process	6.49e-05	0.0069	4.19	13329	278	126	11	[Lag3 - lymphocyte-activation gene 3, Ccl2 - chemokine (c-c motif) ligand 2, Parp9 - poly (adp-ribose) polymerase family, member 9, Lgals3 - lectin, galactose binding, soluble 3, H2-Q4 - histocompatibility 2, q region locus 4, Il1r1 - interleukin 1 receptor, type i, Tlr2 - toll-like receptor 2, H2-L - histocompatibility 2, d region locus l, Fgl2 - fibrinogen-like protein 2, Rsad2 - radical s-aden…
GO:0001775	cell activation	6.55e-05	0.00692	3.6	13329	382	126	13	[Tmem106a - transmembrane protein 106a, Cd44 - cd44 antigen, Icam1 - intercellular adhesion molecule 1, Cd99 - cd99 antigen, C1qa - complement component 1, q subcomponent, alpha polypeptide, Fgl2 - fibrinogen-like protein 2, Cd180 - cd180 antigen, Lag3 - lymphocyte-activation gene 3, Cxcl10 - chemokine (c-x-c motif) ligand 10, Fcgr4 - fc receptor, igg, low affinity iv, Tlr2 - toll-like receptor 2…
GO:1990266	neutrophil migration	7.01e-05	0.00734	11.5	13329	46	126	5	[Ccl2 - chemokine (c-c motif) ligand 2, Cxcl13 - chemokine (c-x-c motif) ligand 13, Lgals3 - lectin, galactose binding, soluble 3, Cxcl10 - chemokine (c-x-c motif) ligand 10, Spp1 - secreted phosphoprotein 1]
GO:0031343	positive regulation of cell killing	7.01e-05	0.00729	11.5	13329	46	126	5	[Ccl2 - chemokine (c-c motif) ligand 2, Lag3 - lymphocyte-activation gene 3, H2-Q4 - histocompatibility 2, q region locus 4, H2-L - histocompatibility 2, d region locus l, Tyrobp - tyro protein tyrosine kinase binding protein]
GO:0050792	regulation of viral process	7.58e-05	0.00783	5.76	13329	147	126	8	[Isg15 - isg15 ubiquitin-like modifier, Ifitm3 - interferon induced transmembrane protein 3, Mdfic - myod family inhibitor domain containing, Oasl2 - 2'-5' oligoadenylate synthetase-like 2, Bst2 - bone marrow stromal cell antigen 2, Trim30a - tripartite motif-containing 30a, Zfp36 - zinc finger protein 36, Rsad2 - radical s-adenosyl methionine domain containing 2]
GO:0071621	granulocyte chemotaxis	7.78e-05	0.00798	11.25	13329	47	126	5	[Ccl2 - chemokine (c-c motif) ligand 2, Cxcl13 - chemokine (c-x-c motif) ligand 13, Lgals3 - lectin, galactose binding, soluble 3, Cxcl10 - chemokine (c-x-c motif) ligand 10, Spp1 - secreted phosphoprotein 1]
GO:0045321	leukocyte activation	7.8e-05	0.00795	3.79	13329	335	126	12	[Lag3 - lymphocyte-activation gene 3, Tmem106a - transmembrane protein 106a, Cd44 - cd44 antigen, Icam1 - intercellular adhesion molecule 1, Tlr2 - toll-like receptor 2, C1qa - complement component 1, q subcomponent, alpha polypeptide, Cd99 - cd99 antigen, Fcgr4 - fc receptor, igg, low affinity iv, Fgl2 - fibrinogen-like protein 2, Rsad2 - radical s-adenosyl methionine domain containing 2, Cd180 …
GO:0010959	regulation of metal ion transport	8.03e-05	0.00812	3.78	13329	336	126	12	[Fxyd5 - fxyd domain-containing ion transport regulator 5, Flna - filamin, alpha, Sgk1 - serum/glucocorticoid regulated kinase 1, Lgals3 - lectin, galactose binding, soluble 3, Serpine1 - serine (or cysteine) peptidase inhibitor, clade e, member 1, Cxcl10 - chemokine (c-x-c motif) ligand 10, Gem - gtp binding protein (gene overexpressed in skeletal muscle), Icam1 - intercellular adhesion molecule…
GO:0048525	negative regulation of viral process	8.67e-05	0.00872	8.24	13329	77	126	6	[Isg15 - isg15 ubiquitin-like modifier, Ifitm3 - interferon induced transmembrane protein 3, Oasl2 - 2'-5' oligoadenylate synthetase-like 2, Bst2 - bone marrow stromal cell antigen 2, Zfp36 - zinc finger protein 36, Rsad2 - radical s-adenosyl methionine domain containing 2]
GO:2000098	negative regulation of smooth muscle cell-matrix adhesion	8.87e-05	0.00885	105.79	13329	2	126	2	[Apod - apolipoprotein d, Serpine1 - serine (or cysteine) peptidase inhibitor, clade e, member 1]
GO:0051250	negative regulation of lymphocyte activation	9.09e-05	0.00901	6.61	13329	112	126	7	[Lag3 - lymphocyte-activation gene 3, Lgals3 - lectin, galactose binding, soluble 3, Cd44 - cd44 antigen, Cd274 - cd274 antigen, Fgl2 - fibrinogen-like protein 2, Gpnmb - glycoprotein (transmembrane) nmb, Tyrobp - tyro protein tyrosine kinase binding protein]
GO:0061844	antimicrobial humoral immune response mediated by antimicrobial peptide	0.000113	0.0111	15.67	13329	27	126	4	[Ccl2 - chemokine (c-c motif) ligand 2, Cxcl13 - chemokine (c-x-c motif) ligand 13, Lgals3 - lectin, galactose binding, soluble 3, Cxcl10 - chemokine (c-x-c motif) ligand 10]
GO:0009719	response to endogenous stimulus	0.000135	0.0132	2.76	13329	652	126	17	[Sgk1 - serum/glucocorticoid regulated kinase 1, Vim - vimentin, Cd44 - cd44 antigen, Icam1 - intercellular adhesion molecule 1, Casp4 - caspase 4, apoptosis-related cysteine peptidase, Zfp36 - zinc finger protein 36, Cdo1 - cysteine dioxygenase 1, cytosolic, Mmp2 - matrix metallopeptidase 2, Cd9 - cd9 antigen, Serpina3n - serine (or cysteine) peptidase inhibitor, clade a, member 3n, Serpine1 - s…
GO:0002699	positive regulation of immune effector process	0.000137	0.0133	5.29	13329	160	126	8	[Lag3 - lymphocyte-activation gene 3, Ccl2 - chemokine (c-c motif) ligand 2, H2-Q4 - histocompatibility 2, q region locus 4, Il1r1 - interleukin 1 receptor, type i, Tlr2 - toll-like receptor 2, H2-L - histocompatibility 2, d region locus l, Rsad2 - radical s-adenosyl methionine domain containing 2, Hmox1 - heme oxygenase (decycling) 1]
GO:0023051	regulation of signaling	0.000137	0.0132	1.72	13329	2580	126	42	[Hgf - hepatocyte growth factor, Abca1 - atp-binding cassette, sub-family a (abc1), member 1, Cd44 - cd44 antigen, Mdfic - myod family inhibitor domain containing, Icam1 - intercellular adhesion molecule 1, Il1r1 - interleukin 1 receptor, type i, Trim30a - tripartite motif-containing 30a, Crlf2 - cytokine receptor-like factor 2, Cd180 - cd180 antigen, Flna - filamin, alpha, Atf3 - activating tran…
GO:0050865	regulation of cell activation	0.000143	0.0137	3.33	13329	413	126	13	[Ccl2 - chemokine (c-c motif) ligand 2, Lgals3 - lectin, galactose binding, soluble 3, Cd44 - cd44 antigen, Crlf2 - cytokine receptor-like factor 2, Cst7 - cystatin f (leukocystatin), Cd274 - cd274 antigen, Fgl2 - fibrinogen-like protein 2, Hmox1 - heme oxygenase (decycling) 1, Lag3 - lymphocyte-activation gene 3, Cd9 - cd9 antigen, Cdkn1a - cyclin-dependent kinase inhibitor 1a (p21), Gpnmb - gly…
GO:0043067	regulation of programmed cell death	0.000149	0.0142	2.18	13329	1213	126	25	[Htatip2 - hiv-1 tat interactive protein 2, homolog (human), Hgf - hepatocyte growth factor, Cd44 - cd44 antigen, Itga5 - integrin alpha 5 (fibronectin receptor alpha), Icam1 - intercellular adhesion molecule 1, Fam129b - family with sequence similarity 129, member b, Cd274 - cd274 antigen, Flna - filamin, alpha, Atf3 - activating transcription factor 3, Mmp2 - matrix metallopeptidase 2, Cxcl10 -…
GO:0050868	negative regulation of T cell activation	0.00015	0.0142	7.47	13329	85	126	6	[Lag3 - lymphocyte-activation gene 3, Lgals3 - lectin, galactose binding, soluble 3, Cd44 - cd44 antigen, Cd274 - cd274 antigen, Fgl2 - fibrinogen-like protein 2, Gpnmb - glycoprotein (transmembrane) nmb]
GO:0050727	regulation of inflammatory response	0.000157	0.0147	4.13	13329	256	126	10	[Usp18 - ubiquitin specific peptidase 18, Hgf - hepatocyte growth factor, Apod - apolipoprotein d, Serpine1 - serine (or cysteine) peptidase inhibitor, clade e, member 1, Cd44 - cd44 antigen, Casp4 - caspase 4, apoptosis-related cysteine peptidase, Il1r1 - interleukin 1 receptor, type i, Zfp36 - zinc finger protein 36, Tlr2 - toll-like receptor 2, Cst7 - cystatin f (leukocystatin)]
GO:0002688	regulation of leukocyte chemotaxis	0.000161	0.015	7.38	13329	86	126	6	[Cxcl13 - chemokine (c-x-c motif) ligand 13, Ccl2 - chemokine (c-c motif) ligand 2, C3ar1 - complement component 3a receptor 1, Serpine1 - serine (or cysteine) peptidase inhibitor, clade e, member 1, Cxcl10 - chemokine (c-x-c motif) ligand 10, Csf1 - colony stimulating factor 1 (macrophage)]
GO:0002460	adaptive immune response based on somatic recombination of immune receptors built from immunoglobulin superfamily domains	0.000166	0.0154	9.62	13329	55	126	5	[C3ar1 - complement component 3a receptor 1, Il18bp - interleukin 18 binding protein, Crlf2 - cytokine receptor-like factor 2, Ctsh - cathepsin h, Irf7 - interferon regulatory factor 7]
GO:0097530	granulocyte migration	0.000166	0.0153	9.62	13329	55	126	5	[Cxcl13 - chemokine (c-x-c motif) ligand 13, Ccl2 - chemokine (c-c motif) ligand 2, Lgals3 - lectin, galactose binding, soluble 3, Cxcl10 - chemokine (c-x-c motif) ligand 10, Spp1 - secreted phosphoprotein 1]
GO:0002691	regulation of cellular extravasation	0.000172	0.0158	14.1	13329	30	126	4	[Ccl2 - chemokine (c-c motif) ligand 2, Icam1 - intercellular adhesion molecule 1, Il1r1 - interleukin 1 receptor, type i, Cd99 - cd99 antigen]
GO:0019730	antimicrobial humoral response	0.000172	0.0157	14.1	13329	30	126	4	[Ccl2 - chemokine (c-c motif) ligand 2, Cxcl13 - chemokine (c-x-c motif) ligand 13, Lgals3 - lectin, galactose binding, soluble 3, Cxcl10 - chemokine (c-x-c motif) ligand 10]
GO:0001910	regulation of leukocyte mediated cytotoxicity	0.000181	0.0164	9.45	13329	56	126	5	[Lag3 - lymphocyte-activation gene 3, Ccl2 - chemokine (c-c motif) ligand 2, H2-Q4 - histocompatibility 2, q region locus 4, H2-L - histocompatibility 2, d region locus l, Tyrobp - tyro protein tyrosine kinase binding protein]
GO:0002821	positive regulation of adaptive immune response	0.000182	0.0164	7.21	13329	88	126	6	[Cd44 - cd44 antigen, H2-Q4 - histocompatibility 2, q region locus 4, Il1r1 - interleukin 1 receptor, type i, H2-L - histocompatibility 2, d region locus l, Cd274 - cd274 antigen, Rsad2 - radical s-adenosyl methionine domain containing 2]
GO:0031214	biomineral tissue development	0.000197	0.0176	9.28	13329	57	126	5	[Ecm1 - extracellular matrix protein 1, Spp1 - secreted phosphoprotein 1, Lox - lysyl oxidase, Srgn - serglycin, Anxa2 - annexin a2]
GO:0050900	leukocyte migration	0.000209	0.0186	5.79	13329	128	126	7	[Ccl2 - chemokine (c-c motif) ligand 2, Cxcl13 - chemokine (c-x-c motif) ligand 13, Lgals3 - lectin, galactose binding, soluble 3, Cxcl10 - chemokine (c-x-c motif) ligand 10, Icam1 - intercellular adhesion molecule 1, Spp1 - secreted phosphoprotein 1, Cd99 - cd99 antigen]
GO:0002274	myeloid leukocyte activation	0.000219	0.0194	6.97	13329	91	126	6	[Tmem106a - transmembrane protein 106a, Fcgr4 - fc receptor, igg, low affinity iv, Tlr2 - toll-like receptor 2, C1qa - complement component 1, q subcomponent, alpha polypeptide, Cd99 - cd99 antigen, Tyrobp - tyro protein tyrosine kinase binding protein]
GO:0045123	cellular extravasation	0.00022	0.0193	24.41	13329	13	126	3	[Ccl2 - chemokine (c-c motif) ligand 2, Icam1 - intercellular adhesion molecule 1, Cd99 - cd99 antigen]
GO:0060326	cell chemotaxis	0.00023	0.0201	5.7	13329	130	126	7	[Ccl2 - chemokine (c-c motif) ligand 2, Cxcl13 - chemokine (c-x-c motif) ligand 13, Lgals3 - lectin, galactose binding, soluble 3, Hgf - hepatocyte growth factor, Cxcl10 - chemokine (c-x-c motif) ligand 10, Lox - lysyl oxidase, Spp1 - secreted phosphoprotein 1]
GO:0009966	regulation of signal transduction	0.000231	0.02	1.77	13329	2209	126	37	[Hgf - hepatocyte growth factor, Abca1 - atp-binding cassette, sub-family a (abc1), member 1, Cd44 - cd44 antigen, Mdfic - myod family inhibitor domain containing, Icam1 - intercellular adhesion molecule 1, Il1r1 - interleukin 1 receptor, type i, Trim30a - tripartite motif-containing 30a, Crlf2 - cytokine receptor-like factor 2, Cd180 - cd180 antigen, Flna - filamin, alpha, Atf3 - activating tran…
GO:0002819	regulation of adaptive immune response	0.000253	0.0218	5.61	13329	132	126	7	[Cd44 - cd44 antigen, H2-Q4 - histocompatibility 2, q region locus 4, Il1r1 - interleukin 1 receptor, type i, H2-L - histocompatibility 2, d region locus l, Cd274 - cd274 antigen, Rsad2 - radical s-adenosyl methionine domain containing 2, Irf7 - interferon regulatory factor 7]
GO:0002694	regulation of leukocyte activation	0.000253	0.0217	3.34	13329	380	126	12	[Lag3 - lymphocyte-activation gene 3, Ccl2 - chemokine (c-c motif) ligand 2, Lgals3 - lectin, galactose binding, soluble 3, Cd44 - cd44 antigen, Cdkn1a - cyclin-dependent kinase inhibitor 1a (p21), Crlf2 - cytokine receptor-like factor 2, Cd274 - cd274 antigen, Cst7 - cystatin f (leukocystatin), Fgl2 - fibrinogen-like protein 2, Gpnmb - glycoprotein (transmembrane) nmb, Hmox1 - heme oxygenase (de…
GO:0061041	regulation of wound healing	0.000261	0.0223	6.75	13329	94	126	6	[Plau - plasminogen activator, urokinase, Ccl2 - chemokine (c-c motif) ligand 2, Cd9 - cd9 antigen, Serpine1 - serine (or cysteine) peptidase inhibitor, clade e, member 1, Cdkn1a - cyclin-dependent kinase inhibitor 1a (p21), Anxa2 - annexin a2]
GO:1903038	negative regulation of leukocyte cell-cell adhesion	0.000261	0.0222	6.75	13329	94	126	6	[Lag3 - lymphocyte-activation gene 3, Lgals3 - lectin, galactose binding, soluble 3, Cd44 - cd44 antigen, Cd274 - cd274 antigen, Fgl2 - fibrinogen-like protein 2, Gpnmb - glycoprotein (transmembrane) nmb]
GO:0010646	regulation of cell communication	0.000262	0.0221	1.69	13329	2567	126	41	[Hgf - hepatocyte growth factor, Abca1 - atp-binding cassette, sub-family a (abc1), member 1, Cd44 - cd44 antigen, Mdfic - myod family inhibitor domain containing, Icam1 - intercellular adhesion molecule 1, Il1r1 - interleukin 1 receptor, type i, Trim30a - tripartite motif-containing 30a, Crlf2 - cytokine receptor-like factor 2, Cd180 - cd180 antigen, Flna - filamin, alpha, Atf3 - activating tran…
GO:0002246	wound healing involved in inflammatory response	0.000264	0.0222	70.52	13329	3	126	2	[Cd44 - cd44 antigen, Hmox1 - heme oxygenase (decycling) 1]
GO:0002605	negative regulation of dendritic cell antigen processing and presentation	0.000264	0.022	70.52	13329	3	126	2	[Cd68 - cd68 antigen, Fgl2 - fibrinogen-like protein 2]
GO:1901509	regulation of endothelial tube morphogenesis	0.000264	0.0219	70.52	13329	3	126	2	[Itgax - integrin alpha x, Cxcl10 - chemokine (c-x-c motif) ligand 10]
GO:1903974	positive regulation of cellular response to macrophage colony-stimulating factor stimulus	0.000264	0.0218	70.52	13329	3	126	2	[Tlr2 - toll-like receptor 2, Csf1 - colony stimulating factor 1 (macrophage)]
GO:1903971	positive regulation of response to macrophage colony-stimulating factor	0.000264	0.0217	70.52	13329	3	126	2	[Tlr2 - toll-like receptor 2, Csf1 - colony stimulating factor 1 (macrophage)]
GO:0010466	negative regulation of peptidase activity	0.000265	0.0216	5.57	13329	133	126	7	[Hgf - hepatocyte growth factor, Serpina3n - serine (or cysteine) peptidase inhibitor, clade a, member 3n, Ecm1 - extracellular matrix protein 1, Cd44 - cd44 antigen, Serpine1 - serine (or cysteine) peptidase inhibitor, clade e, member 1, Timp2 - tissue inhibitor of metalloproteinase 2, Cst7 - cystatin f (leukocystatin)]
GO:1903035	negative regulation of response to wounding	0.000272	0.022	8.67	13329	61	126	5	[Plau - plasminogen activator, urokinase, Cd9 - cd9 antigen, Serpine1 - serine (or cysteine) peptidase inhibitor, clade e, member 1, Cdkn1a - cyclin-dependent kinase inhibitor 1a (p21), Anxa2 - annexin a2]
GO:0032653	regulation of interleukin-10 production	0.000283	0.0228	12.45	13329	34	126	4	[Hgf - hepatocyte growth factor, Tlr2 - toll-like receptor 2, Cd274 - cd274 antigen, Tyrobp - tyro protein tyrosine kinase binding protein]
GO:0052547	regulation of peptidase activity	0.000287	0.023	3.83	13329	276	126	10	[Hgf - hepatocyte growth factor, Serpina3n - serine (or cysteine) peptidase inhibitor, clade a, member 3n, Ecm1 - extracellular matrix protein 1, Serpine1 - serine (or cysteine) peptidase inhibitor, clade e, member 1, Cd44 - cd44 antigen, Pmaip1 - phorbol-12-myristate-13-acetate-induced protein 1, Timp2 - tissue inhibitor of metalloproteinase 2, Casp4 - caspase 4, apoptosis-related cysteine pepti…
GO:0042981	regulation of apoptotic process	0.000301	0.024	2.13	13329	1194	126	24	[Sgk1 - serum/glucocorticoid regulated kinase 1, Lgals3 - lectin, galactose binding, soluble 3, Hgf - hepatocyte growth factor, Cd44 - cd44 antigen, Itga5 - integrin alpha 5 (fibronectin receptor alpha), Icam1 - intercellular adhesion molecule 1, Casp4 - caspase 4, apoptosis-related cysteine peptidase, Zfp36 - zinc finger protein 36, Cd274 - cd274 antigen, Fam129b - family with sequence similarit…
GO:0007568	aging	0.00031	0.0246	6.54	13329	97	126	6	[Mmp2 - matrix metallopeptidase 2, Apod - apolipoprotein d, Serpine1 - serine (or cysteine) peptidase inhibitor, clade e, member 1, Cdkn1a - cyclin-dependent kinase inhibitor 1a (p21), C1qa - complement component 1, q subcomponent, alpha polypeptide, Cd68 - cd68 antigen]
GO:0050663	cytokine secretion	0.000318	0.0251	12.09	13329	35	126	4	[Tmem106a - transmembrane protein 106a, Isg15 - isg15 ubiquitin-like modifier, Abca1 - atp-binding cassette, sub-family a (abc1), member 1, Tlr2 - toll-like receptor 2]
GO:0022408	negative regulation of cell-cell adhesion	0.000332	0.026	5.37	13329	138	126	7	[Lag3 - lymphocyte-activation gene 3, Lgals3 - lectin, galactose binding, soluble 3, Cd9 - cd9 antigen, Cd44 - cd44 antigen, Cd274 - cd274 antigen, Fgl2 - fibrinogen-like protein 2, Gpnmb - glycoprotein (transmembrane) nmb]
GO:1903901	negative regulation of viral life cycle	0.00034	0.0265	8.26	13329	64	126	5	[Isg15 - isg15 ubiquitin-like modifier, Ifitm3 - interferon induced transmembrane protein 3, Oasl2 - 2'-5' oligoadenylate synthetase-like 2, Bst2 - bone marrow stromal cell antigen 2, Rsad2 - radical s-adenosyl methionine domain containing 2]
GO:0044344	cellular response to fibroblast growth factor stimulus	0.000345	0.0268	21.16	13329	15	126	3	[Cd44 - cd44 antigen, Zfp36 - zinc finger protein 36, Iqgap1 - iq motif containing gtpase activating protein 1]
GO:0090026	positive regulation of monocyte chemotaxis	0.000345	0.0267	21.16	13329	15	126	3	[Ccl2 - chemokine (c-c motif) ligand 2, Serpine1 - serine (or cysteine) peptidase inhibitor, clade e, member 1, Cxcl10 - chemokine (c-x-c motif) ligand 10]
GO:0001952	regulation of cell-matrix adhesion	0.000346	0.0266	6.41	13329	99	126	6	[Plau - plasminogen activator, urokinase, Apod - apolipoprotein d, Serpine1 - serine (or cysteine) peptidase inhibitor, clade e, member 1, Fmn1 - formin 1, Iqgap1 - iq motif containing gtpase activating protein 1, Csf1 - colony stimulating factor 1 (macrophage)]
GO:2000404	regulation of T cell migration	0.000355	0.0271	11.75	13329	36	126	4	[Cxcl13 - chemokine (c-x-c motif) ligand 13, Apod - apolipoprotein d, Ecm1 - extracellular matrix protein 1, Cxcl10 - chemokine (c-x-c motif) ligand 10]
GO:1905521	regulation of macrophage migration	0.000355	0.027	11.75	13329	36	126	4	[Ccl2 - chemokine (c-c motif) ligand 2, C3ar1 - complement component 3a receptor 1, Cd9 - cd9 antigen, Csf1 - colony stimulating factor 1 (macrophage)]
GO:0006959	humoral immune response	0.000366	0.0277	8.14	13329	65	126	5	[Cxcl13 - chemokine (c-x-c motif) ligand 13, Ccl2 - chemokine (c-c motif) ligand 2, Lgals3 - lectin, galactose binding, soluble 3, Cxcl10 - chemokine (c-x-c motif) ligand 10, C1qa - complement component 1, q subcomponent, alpha polypeptide]
GO:0032103	positive regulation of response to external stimulus	0.000414	0.0311	4.02	13329	237	126	9	[Ccl2 - chemokine (c-c motif) ligand 2, Cxcl13 - chemokine (c-x-c motif) ligand 13, C3ar1 - complement component 3a receptor 1, Serpine1 - serine (or cysteine) peptidase inhibitor, clade e, member 1, Cxcl10 - chemokine (c-x-c motif) ligand 10, Cyba - cytochrome b-245, alpha polypeptide, Tlr2 - toll-like receptor 2, Cd180 - cd180 antigen, Csf1 - colony stimulating factor 1 (macrophage)]
GO:0008630	intrinsic apoptotic signaling pathway in response to DNA damage	0.000421	0.0315	7.89	13329	67	126	5	[Crip1 - cysteine-rich protein 1 (intestinal), Pmaip1 - phorbol-12-myristate-13-acetate-induced protein 1, Cdkn1a - cyclin-dependent kinase inhibitor 1a (p21), Shisa5 - shisa homolog 5 (xenopus laevis), Hmox1 - heme oxygenase (decycling) 1]
GO:0002833	positive regulation of response to biotic stimulus	0.000438	0.0326	11.14	13329	38	126	4	[Cyba - cytochrome b-245, alpha polypeptide, Tlr2 - toll-like receptor 2, Cd274 - cd274 antigen, Cd180 - cd180 antigen]
GO:0031349	positive regulation of defense response	0.00044	0.0326	3.98	13329	239	126	9	[Lag3 - lymphocyte-activation gene 3, Parp9 - poly (adp-ribose) polymerase family, member 9, Mmp2 - matrix metallopeptidase 2, Serpine1 - serine (or cysteine) peptidase inhibitor, clade e, member 1, Irgm1 - immunity-related gtpase family m member 1, Cyba - cytochrome b-245, alpha polypeptide, Tlr2 - toll-like receptor 2, Rsad2 - radical s-adenosyl methionine domain containing 2, Irf7 - interferon…
GO:0031341	regulation of cell killing	0.000451	0.0333	7.78	13329	68	126	5	[Lag3 - lymphocyte-activation gene 3, Ccl2 - chemokine (c-c motif) ligand 2, H2-Q4 - histocompatibility 2, q region locus 4, H2-L - histocompatibility 2, d region locus l, Tyrobp - tyro protein tyrosine kinase binding protein]
GO:0043269	regulation of ion transport	0.000455	0.0334	2.68	13329	591	126	15	[Ccl2 - chemokine (c-c motif) ligand 2, Lgals3 - lectin, galactose binding, soluble 3, Sgk1 - serum/glucocorticoid regulated kinase 1, Icam1 - intercellular adhesion molecule 1, S100a1 - s100 calcium binding protein a1, Cyba - cytochrome b-245, alpha polypeptide, Cybb - cytochrome b-245, beta polypeptide, Fxyd5 - fxyd domain-containing ion transport regulator 5, Flna - filamin, alpha, Serpine1 - …
GO:0022407	regulation of cell-cell adhesion	0.000486	0.0355	3.59	13329	295	126	10	[Lag3 - lymphocyte-activation gene 3, Ccl2 - chemokine (c-c motif) ligand 2, Cxcl13 - chemokine (c-x-c motif) ligand 13, Lgals3 - lectin, galactose binding, soluble 3, Cd9 - cd9 antigen, Cd44 - cd44 antigen, Icam1 - intercellular adhesion molecule 1, Cd274 - cd274 antigen, Fgl2 - fibrinogen-like protein 2, Gpnmb - glycoprotein (transmembrane) nmb]
GO:0008285	negative regulation of cell proliferation	0.000489	0.0355	2.79	13329	531	126	14	[Lgals3 - lectin, galactose binding, soluble 3, Cd44 - cd44 antigen, Fam129b - family with sequence similarity 129, member b, Cd274 - cd274 antigen, Hmox1 - heme oxygenase (decycling) 1, Cd9 - cd9 antigen, Apod - apolipoprotein d, Ifitm3 - interferon induced transmembrane protein 3, Pmaip1 - phorbol-12-myristate-13-acetate-induced protein 1, Timp2 - tissue inhibitor of metalloproteinase 2, Cdkn1a…
GO:0010951	negative regulation of endopeptidase activity	0.0005	0.0361	5.99	13329	106	126	6	[Hgf - hepatocyte growth factor, Serpina3n - serine (or cysteine) peptidase inhibitor, clade a, member 3n, Cd44 - cd44 antigen, Serpine1 - serine (or cysteine) peptidase inhibitor, clade e, member 1, Timp2 - tissue inhibitor of metalloproteinase 2, Cst7 - cystatin f (leukocystatin)]
GO:0044419	interspecies interaction between organisms	0.000506	0.0364	4.36	13329	194	126	8	[Ccl2 - chemokine (c-c motif) ligand 2, Cxcl13 - chemokine (c-x-c motif) ligand 13, Lgals3 - lectin, galactose binding, soluble 3, Cxcl10 - chemokine (c-x-c motif) ligand 10, Ctsb - cathepsin b, Mpeg1 - macrophage expressed gene 1, Tlr2 - toll-like receptor 2, Anxa2 - annexin a2]
GO:0032020	ISG15-protein conjugation	0.000525	0.0376	52.89	13329	4	126	2	[Isg15 - isg15 ubiquitin-like modifier, Ube2l6 - ubiquitin-conjugating enzyme e2l 6]
GO:0002291	T cell activation via T cell receptor contact with antigen bound to MHC molecule on antigen presenting cell	0.000525	0.0374	52.89	13329	4	126	2	[Icam1 - intercellular adhesion molecule 1, Fgl2 - fibrinogen-like protein 2]
GO:0045085	negative regulation of interleukin-2 biosynthetic process	0.000525	0.0372	52.89	13329	4	126	2	[Lag3 - lymphocyte-activation gene 3, Zfp36 - zinc finger protein 36]
GO:0045590	negative regulation of regulatory T cell differentiation	0.000525	0.037	52.89	13329	4	126	2	[Lag3 - lymphocyte-activation gene 3, Cd44 - cd44 antigen]
GO:0042730	fibrinolysis	0.000525	0.0369	52.89	13329	4	126	2	[Plau - plasminogen activator, urokinase, Anxa2 - annexin a2]
GO:0002711	positive regulation of T cell mediated immunity	0.000535	0.0373	10.58	13329	40	126	4	[H2-Q4 - histocompatibility 2, q region locus 4, Il1r1 - interleukin 1 receptor, type i, H2-L - histocompatibility 2, d region locus l, Rsad2 - radical s-adenosyl methionine domain containing 2]
GO:0051246	regulation of protein metabolic process	0.000578	0.0402	1.73	13329	2141	126	35	[Hgf - hepatocyte growth factor, Cd44 - cd44 antigen, Mdfic - myod family inhibitor domain containing, Itga5 - integrin alpha 5 (fibronectin receptor alpha), Icam1 - intercellular adhesion molecule 1, Trim30a - tripartite motif-containing 30a, Cst7 - cystatin f (leukocystatin), Lag3 - lymphocyte-activation gene 3, Flna - filamin, alpha, Atf3 - activating transcription factor 3, Isg15 - isg15 ubiq…
GO:0002831	regulation of response to biotic stimulus	0.00058	0.0401	5.82	13329	109	126	6	[Parp9 - poly (adp-ribose) polymerase family, member 9, Cyba - cytochrome b-245, alpha polypeptide, Tlr2 - toll-like receptor 2, Cd274 - cd274 antigen, Fgl2 - fibrinogen-like protein 2, Cd180 - cd180 antigen]
GO:0045069	regulation of viral genome replication	0.000588	0.0405	7.35	13329	72	126	5	[Isg15 - isg15 ubiquitin-like modifier, Ifitm3 - interferon induced transmembrane protein 3, Oasl2 - 2'-5' oligoadenylate synthetase-like 2, Bst2 - bone marrow stromal cell antigen 2, Rsad2 - radical s-adenosyl methionine domain containing 2]
GO:0071774	response to fibroblast growth factor	0.000607	0.0416	17.63	13329	18	126	3	[Cd44 - cd44 antigen, Zfp36 - zinc finger protein 36, Iqgap1 - iq motif containing gtpase activating protein 1]
GO:0010759	positive regulation of macrophage chemotaxis	0.000607	0.0414	17.63	13329	18	126	3	[Ccl2 - chemokine (c-c motif) ligand 2, C3ar1 - complement component 3a receptor 1, Csf1 - colony stimulating factor 1 (macrophage)]
GO:0010811	positive regulation of cell-substrate adhesion	0.000608	0.0413	5.77	13329	110	126	6	[Flna - filamin, alpha, Itga5 - integrin alpha 5 (fibronectin receptor alpha), Spp1 - secreted phosphoprotein 1, Fmn1 - formin 1, Iqgap1 - iq motif containing gtpase activating protein 1, Csf1 - colony stimulating factor 1 (macrophage)]
GO:0002703	regulation of leukocyte mediated immunity	0.000618	0.0418	4.84	13329	153	126	7	[Lag3 - lymphocyte-activation gene 3, H2-Q4 - histocompatibility 2, q region locus 4, Il1r1 - interleukin 1 receptor, type i, Tlr2 - toll-like receptor 2, H2-L - histocompatibility 2, d region locus l, Rsad2 - radical s-adenosyl methionine domain containing 2, Hmox1 - heme oxygenase (decycling) 1]
GO:0097529	myeloid leukocyte migration	0.000626	0.0421	7.25	13329	73	126	5	[Cxcl13 - chemokine (c-x-c motif) ligand 13, Ccl2 - chemokine (c-c motif) ligand 2, Lgals3 - lectin, galactose binding, soluble 3, Cxcl10 - chemokine (c-x-c motif) ligand 10, Spp1 - secreted phosphoprotein 1]
GO:0050707	regulation of cytokine secretion	0.000642	0.043	4.81	13329	154	126	7	[Anxa4 - annexin a4, AF251705 - cdna sequence af251705, Casp4 - caspase 4, apoptosis-related cysteine peptidase, Crlf2 - cytokine receptor-like factor 2, Tlr2 - toll-like receptor 2, Cd274 - cd274 antigen, Srgn - serglycin]
GO:0042116	macrophage activation	0.000645	0.043	10.07	13329	42	126	4	[Tmem106a - transmembrane protein 106a, Tlr2 - toll-like receptor 2, C1qa - complement component 1, q subcomponent, alpha polypeptide, Tyrobp - tyro protein tyrosine kinase binding protein]
GO:0065008	regulation of biological quality	0.000647	0.0429	1.61	13329	2766	126	42	[Abca1 - atp-binding cassette, sub-family a (abc1), member 1, Cd44 - cd44 antigen, Icam1 - intercellular adhesion molecule 1, Capg - capping protein (actin filament), gelsolin-like, Fam129b - family with sequence similarity 129, member b, Cdo1 - cysteine dioxygenase 1, cytosolic, Flna - filamin, alpha, Cxcl13 - chemokine (c-x-c motif) ligand 13, Mmp2 - matrix metallopeptidase 2, Cd9 - cd9 antigen…
GO:0050731	positive regulation of peptidyl-tyrosine phosphorylation	0.000668	0.0441	4.78	13329	155	126	7	[Parp9 - poly (adp-ribose) polymerase family, member 9, Hgf - hepatocyte growth factor, Cspg4 - chondroitin sulfate proteoglycan 4, Cd44 - cd44 antigen, Itga5 - integrin alpha 5 (fibronectin receptor alpha), Icam1 - intercellular adhesion molecule 1, Iqgap1 - iq motif containing gtpase activating protein 1]
GO:1903900	regulation of viral life cycle	0.000669	0.044	5.67	13329	112	126	6	[Isg15 - isg15 ubiquitin-like modifier, Ifitm3 - interferon induced transmembrane protein 3, Oasl2 - 2'-5' oligoadenylate synthetase-like 2, Bst2 - bone marrow stromal cell antigen 2, Trim30a - tripartite motif-containing 30a, Rsad2 - radical s-adenosyl methionine domain containing 2]
GO:0044093	positive regulation of molecular function	0.000677	0.0444	2.05	13329	1186	126	23	[Ccl2 - chemokine (c-c motif) ligand 2, Lgals3 - lectin, galactose binding, soluble 3, Hgf - hepatocyte growth factor, Mdfic - myod family inhibitor domain containing, Icam1 - intercellular adhesion molecule 1, S100a1 - s100 calcium binding protein a1, Casp4 - caspase 4, apoptosis-related cysteine peptidase, Cyba - cytochrome b-245, alpha polypeptide, Fam129b - family with sequence similarity 129…
GO:0050921	positive regulation of chemotaxis	0.000701	0.0457	5.62	13329	113	126	6	[Ccl2 - chemokine (c-c motif) ligand 2, Cxcl13 - chemokine (c-x-c motif) ligand 13, C3ar1 - complement component 3a receptor 1, Serpine1 - serine (or cysteine) peptidase inhibitor, clade e, member 1, Cxcl10 - chemokine (c-x-c motif) ligand 10, Csf1 - colony stimulating factor 1 (macrophage)]
GO:0002708	positive regulation of lymphocyte mediated immunity	0.000709	0.046	7.05	13329	75	126	5	[Lag3 - lymphocyte-activation gene 3, H2-Q4 - histocompatibility 2, q region locus 4, Il1r1 - interleukin 1 receptor, type i, H2-L - histocompatibility 2, d region locus l, Rsad2 - radical s-adenosyl methionine domain containing 2]
GO:0071276	cellular response to cadmium ion	0.000715	0.0462	16.7	13329	19	126	3	[Mt2 - metallothionein 2, Mt1 - metallothionein 1, Hmox1 - heme oxygenase (decycling) 1]
GO:0042535	positive regulation of tumor necrosis factor biosynthetic process	0.000715	0.046	16.7	13329	19	126	3	[Cybb - cytochrome b-245, beta polypeptide, Tlr2 - toll-like receptor 2, Tyrobp - tyro protein tyrosine kinase binding protein]
GO:0031643	positive regulation of myelination	0.000715	0.0458	16.7	13329	19	126	3	[Itgax - integrin alpha x, Hgf - hepatocyte growth factor, Cst7 - cystatin f (leukocystatin)]
GO:0032944	regulation of mononuclear cell proliferation	0.00072	0.0459	4.72	13329	157	126	7	[Lgals3 - lectin, galactose binding, soluble 3, Cd44 - cd44 antigen, Cdkn1a - cyclin-dependent kinase inhibitor 1a (p21), Cd274 - cd274 antigen, Csf1 - colony stimulating factor 1 (macrophage), Gpnmb - glycoprotein (transmembrane) nmb, Tyrobp - tyro protein tyrosine kinase binding protein]
GO:0042742	defense response to bacterium	0.000735	0.0466	5.57	13329	114	126	6	[Cxcl13 - chemokine (c-x-c motif) ligand 13, Isg15 - isg15 ubiquitin-like modifier, Serpine1 - serine (or cysteine) peptidase inhibitor, clade e, member 1, Mpeg1 - macrophage expressed gene 1, Tlr2 - toll-like receptor 2, Lyz2 - lysozyme 2]
GO:1903037	regulation of leukocyte cell-cell adhesion	0.000775	0.049	4.09	13329	207	126	8	[Lag3 - lymphocyte-activation gene 3, Ccl2 - chemokine (c-c motif) ligand 2, Lgals3 - lectin, galactose binding, soluble 3, Cd44 - cd44 antigen, Icam1 - intercellular adhesion molecule 1, Cd274 - cd274 antigen, Fgl2 - fibrinogen-like protein 2, Gpnmb - glycoprotein (transmembrane) nmb]
GO:0070663	regulation of leukocyte proliferation	0.000836	0.0526	4.6	13329	161	126	7	[Lgals3 - lectin, galactose binding, soluble 3, Cd44 - cd44 antigen, Cdkn1a - cyclin-dependent kinase inhibitor 1a (p21), Cd274 - cd274 antigen, Csf1 - colony stimulating factor 1 (macrophage), Gpnmb - glycoprotein (transmembrane) nmb, Tyrobp - tyro protein tyrosine kinase binding protein]
GO:2001237	negative regulation of extrinsic apoptotic signaling pathway	0.000848	0.0532	6.78	13329	78	126	5	[Lgals3 - lectin, galactose binding, soluble 3, Hgf - hepatocyte growth factor, Serpine1 - serine (or cysteine) peptidase inhibitor, clade e, member 1, Icam1 - intercellular adhesion molecule 1, Hmox1 - heme oxygenase (decycling) 1]
GO:0043062	extracellular structure organization	0.000851	0.0531	4.03	13329	210	126	8	[Mmp2 - matrix metallopeptidase 2, Lgals3 - lectin, galactose binding, soluble 3, Abca1 - atp-binding cassette, sub-family a (abc1), member 1, Gfap - glial fibrillary acidic protein, Lox - lysyl oxidase, Mmp19 - matrix metallopeptidase 19, Sulf2 - sulfatase 2, Anxa2 - annexin a2]
GO:2000562	negative regulation of CD4-positive, alpha-beta T cell proliferation	0.00087	0.0541	42.31	13329	5	126	2	[Cd44 - cd44 antigen, Cd274 - cd274 antigen]
GO:0010273	detoxification of copper ion	0.00087	0.0539	42.31	13329	5	126	2	[Mt2 - metallothionein 2, Mt1 - metallothionein 1]
GO:0050665	hydrogen peroxide biosynthetic process	0.00087	0.0536	42.31	13329	5	126	2	[Cyba - cytochrome b-245, alpha polypeptide, Cybb - cytochrome b-245, beta polypeptide]
GO:1903969	regulation of response to macrophage colony-stimulating factor	0.00087	0.0534	42.31	13329	5	126	2	[Tlr2 - toll-like receptor 2, Csf1 - colony stimulating factor 1 (macrophage)]
GO:1903972	regulation of cellular response to macrophage colony-stimulating factor stimulus	0.00087	0.0532	42.31	13329	5	126	2	[Tlr2 - toll-like receptor 2, Csf1 - colony stimulating factor 1 (macrophage)]
GO:0042158	lipoprotein biosynthetic process	0.00087	0.053	42.31	13329	5	126	2	[Apobec1 - apolipoprotein b mrna editing enzyme, catalytic polypeptide 1, Abca1 - atp-binding cassette, sub-family a (abc1), member 1]
GO:0097368	establishment of Sertoli cell barrier	0.00087	0.0527	42.31	13329	5	126	2	[Flna - filamin, alpha, Icam1 - intercellular adhesion molecule 1]
GO:0006935	chemotaxis	0.000878	0.053	4.01	13329	211	126	8	[Ccl2 - chemokine (c-c motif) ligand 2, Cxcl13 - chemokine (c-x-c motif) ligand 13, C3ar1 - complement component 3a receptor 1, Lgals3 - lectin, galactose binding, soluble 3, Hgf - hepatocyte growth factor, Cxcl10 - chemokine (c-x-c motif) ligand 10, Lox - lysyl oxidase, Spp1 - secreted phosphoprotein 1]
GO:0097190	apoptotic signaling pathway	0.000878	0.0528	4.01	13329	211	126	8	[Crip1 - cysteine-rich protein 1 (intestinal), Sgpl1 - sphingosine phosphate lyase 1, Pmaip1 - phorbol-12-myristate-13-acetate-induced protein 1, Cdkn1a - cyclin-dependent kinase inhibitor 1a (p21), Casp4 - caspase 4, apoptosis-related cysteine peptidase, Shisa5 - shisa homolog 5 (xenopus laevis), Hmox1 - heme oxygenase (decycling) 1, Tyrobp - tyro protein tyrosine kinase binding protein]
GO:2000401	regulation of lymphocyte migration	0.000914	0.0547	9.2	13329	46	126	4	[Cxcl13 - chemokine (c-x-c motif) ligand 13, Apod - apolipoprotein d, Ecm1 - extracellular matrix protein 1, Cxcl10 - chemokine (c-x-c motif) ligand 10]
GO:0032760	positive regulation of tumor necrosis factor production	0.000951	0.0567	6.61	13329	80	126	5	[Ccl2 - chemokine (c-c motif) ligand 2, Cyba - cytochrome b-245, alpha polypeptide, Cybb - cytochrome b-245, beta polypeptide, Tlr2 - toll-like receptor 2, Tyrobp - tyro protein tyrosine kinase binding protein]
GO:0051924	regulation of calcium ion transport	0.000962	0.0571	3.95	13329	214	126	8	[Lgals3 - lectin, galactose binding, soluble 3, Serpine1 - serine (or cysteine) peptidase inhibitor, clade e, member 1, Cxcl10 - chemokine (c-x-c motif) ligand 10, Gem - gtp binding protein (gene overexpressed in skeletal muscle), Icam1 - intercellular adhesion molecule 1, S100a1 - s100 calcium binding protein a1, Cyba - cytochrome b-245, alpha polypeptide, Anxa2 - annexin a2]
GO:0042330	taxis	0.000962	0.0569	3.95	13329	214	126	8	[Ccl2 - chemokine (c-c motif) ligand 2, Cxcl13 - chemokine (c-x-c motif) ligand 13, C3ar1 - complement component 3a receptor 1, Lgals3 - lectin, galactose binding, soluble 3, Hgf - hepatocyte growth factor, Cxcl10 - chemokine (c-x-c motif) ligand 10, Lox - lysyl oxidase, Spp1 - secreted phosphoprotein 1]
GO:0034123	positive regulation of toll-like receptor signaling pathway	0.000969	0.0571	15.11	13329	21	126	3	[Cyba - cytochrome b-245, alpha polypeptide, Tlr2 - toll-like receptor 2, Rsad2 - radical s-adenosyl methionine domain containing 2]
GO:0030574	collagen catabolic process	0.000969	0.0568	15.11	13329	21	126	3	[Mmp2 - matrix metallopeptidase 2, Ctsb - cathepsin b, Mmp19 - matrix metallopeptidase 19]
GO:0042036	negative regulation of cytokine biosynthetic process	0.000969	0.0566	15.11	13329	21	126	3	[Lag3 - lymphocyte-activation gene 3, Zfp36 - zinc finger protein 36, Tyrobp - tyro protein tyrosine kinase binding protein]
GO:0090025	regulation of monocyte chemotaxis	0.000969	0.0564	15.11	13329	21	126	3	[Ccl2 - chemokine (c-c motif) ligand 2, Serpine1 - serine (or cysteine) peptidase inhibitor, clade e, member 1, Cxcl10 - chemokine (c-x-c motif) ligand 10]
GO:0050790	regulation of catalytic activity	0.000989	0.0574	1.89	13329	1455	126	26	[Hgf - hepatocyte growth factor, Cd44 - cd44 antigen, Mdfic - myod family inhibitor domain containing, Icam1 - intercellular adhesion molecule 1, Ctsb - cathepsin b, Cst7 - cystatin f (leukocystatin), Cxcl13 - chemokine (c-x-c motif) ligand 13, Serpina3n - serine (or cysteine) peptidase inhibitor, clade a, member 3n, Ecm1 - extracellular matrix protein 1, Pmaip1 - phorbol-12-myristate-13-acetate-…
GO:0030193	regulation of blood coagulation	0.000992	0.0573	9	13329	47	126	4	[Plau - plasminogen activator, urokinase, Cd9 - cd9 antigen, Serpine1 - serine (or cysteine) peptidase inhibitor, clade e, member 1, Anxa2 - annexin a2]

## Sheet: Cx3cr1_down_GOprocess
GO Term	Description	P-value	FDR q-value	Enrichment	N	B	n	b	Genes
GO:0050804	modulation of chemical synaptic transmission	5.15e-37	7.2e-33	4.39	11164	407	600	96	[Igsf9b - immunoglobulin superfamily, member 9b, Shank2 - sh3/ankyrin domain gene 2, Camk2a - calcium/calmodulin-dependent protein kinase ii alpha, Dlgap2 - discs, large (drosophila) homolog-associated protein 2, Syt7 - synaptotagmin vii, Rasgrf1 - ras protein-specific guanine nucleotide-releasing factor 1, Nlgn2 - neuroligin 2, Adcy1 - adenylate cyclase 1, Camk2b - calcium/calmodulin-dependent p…
GO:0099177	regulation of trans-synaptic signaling	6.43e-37	4.49e-33	4.38	11164	408	600	96	[Igsf9b - immunoglobulin superfamily, member 9b, Shank2 - sh3/ankyrin domain gene 2, Camk2a - calcium/calmodulin-dependent protein kinase ii alpha, Dlgap2 - discs, large (drosophila) homolog-associated protein 2, Syt7 - synaptotagmin vii, Rasgrf1 - ras protein-specific guanine nucleotide-releasing factor 1, Nlgn2 - neuroligin 2, Adcy1 - adenylate cyclase 1, Camk2b - calcium/calmodulin-dependent p…
GO:0051049	regulation of transport	1.61e-27	7.49e-24	2.33	11164	1326	600	166	[Camk2a - calcium/calmodulin-dependent protein kinase ii alpha, Gdi1 - guanosine diphosphate (gdp) dissociation inhibitor 1, Syt7 - synaptotagmin vii, Nlgn2 - neuroligin 2, Adcy1 - adenylate cyclase 1, P2ry12 - purinergic receptor p2y, g-protein coupled 12, Atp2b4 - atpase, ca++ transporting, plasma membrane 4, Pfkm - phosphofructokinase, muscle, Pfn2 - profilin 2, Asic1 - acid-sensing (proton-ga…
GO:0050877	nervous system process	4.31e-27	1.51e-23	3.47	11164	493	600	92	[Shank2 - sh3/ankyrin domain gene 2, Myh14 - myosin, heavy polypeptide 14, Jag2 - jagged 2, Agtpbp1 - atp/gtp binding protein 1, Nlgn2 - neuroligin 2, Adcy1 - adenylate cyclase 1, Ntrk3 - neurotrophic tyrosine kinase, receptor, type 3, Slc12a5 - solute carrier family 12, member 5, Camk2b - calcium/calmodulin-dependent protein kinase ii, beta, Gria1 - glutamate receptor, ionotropic, ampa1 (alpha 1…
GO:0032879	regulation of localization	6.73e-26	1.88e-22	1.99	11164	1956	600	209	[Camk2a - calcium/calmodulin-dependent protein kinase ii alpha, Syt7 - synaptotagmin vii, Adcy1 - adenylate cyclase 1, Ntrk3 - neurotrophic tyrosine kinase, receptor, type 3, Camk2b - calcium/calmodulin-dependent protein kinase ii, beta, Camk2g - calcium/calmodulin-dependent protein kinase ii gamma, Asic1 - acid-sensing (proton-gated) ion channel 1, Nrxn1 - neurexin i, Stxbp1 - syntaxin binding p…
GO:0007610	behavior	1.81e-24	4.21e-21	3.44	11164	454	600	84	[Shank2 - sh3/ankyrin domain gene 2, Unc79 - unc-79 homolog (c. elegans), Myh14 - myosin, heavy polypeptide 14, Agtpbp1 - atp/gtp binding protein 1, Nlgn2 - neuroligin 2, Adcy1 - adenylate cyclase 1, Slc12a5 - solute carrier family 12, member 5, Vps13a - vacuolar protein sorting 13a (yeast), Gria1 - glutamate receptor, ionotropic, ampa1 (alpha 1), Zfhx2 - zinc finger homeobox 2, Slc4a10 - solute …
GO:0099536	synaptic signaling	6.59e-24	1.32e-20	5.2	11164	186	600	52	[Dlgap2 - discs, large (drosophila) homolog-associated protein 2, Slc17a6 - solute carrier family 17 (sodium-dependent inorganic phosphate cotransporter), member 6, Slc12a5 - solute carrier family 12, member 5, Gria2 - glutamate receptor, ionotropic, ampa2 (alpha 2), Gria1 - glutamate receptor, ionotropic, ampa1 (alpha 1), Nrxn1 - neurexin i, Stxbp1 - syntaxin binding protein 1, Nrxn3 - neurexin …
GO:0099537	trans-synaptic signaling	6.59e-24	1.15e-20	5.2	11164	186	600	52	[Dlgap2 - discs, large (drosophila) homolog-associated protein 2, Slc17a6 - solute carrier family 17 (sodium-dependent inorganic phosphate cotransporter), member 6, Slc12a5 - solute carrier family 12, member 5, Gria2 - glutamate receptor, ionotropic, ampa2 (alpha 2), Gria1 - glutamate receptor, ionotropic, ampa1 (alpha 1), Nrxn1 - neurexin i, Stxbp1 - syntaxin binding protein 1, Nrxn3 - neurexin …
GO:0007267	cell-cell signaling	1.2e-23	1.86e-20	4.69	11164	226	600	57	[Dlgap2 - discs, large (drosophila) homolog-associated protein 2, Slc17a6 - solute carrier family 17 (sodium-dependent inorganic phosphate cotransporter), member 6, Slc12a5 - solute carrier family 12, member 5, Gria2 - glutamate receptor, ionotropic, ampa2 (alpha 2), Gria1 - glutamate receptor, ionotropic, ampa1 (alpha 1), Stab1 - stabilin 1, Panx2 - pannexin 2, Nrxn1 - neurexin i, Stxbp1 - synta…
GO:0003008	system process	3.89e-23	5.43e-20	2.79	11164	707	600	106	[Myh14 - myosin, heavy polypeptide 14, Nlgn2 - neuroligin 2, Adcy1 - adenylate cyclase 1, Ntrk3 - neurotrophic tyrosine kinase, receptor, type 3, Slc12a5 - solute carrier family 12, member 5, Camk2b - calcium/calmodulin-dependent protein kinase ii, beta, Atp2b4 - atpase, ca++ transporting, plasma membrane 4, Camta1 - calmodulin binding transcription activator 1, Asic1 - acid-sensing (proton-gated…
GO:0023052	signaling	1.35e-22	1.72e-19	4.28	11164	261	600	60	[Dlgap2 - discs, large (drosophila) homolog-associated protein 2, Slc17a6 - solute carrier family 17 (sodium-dependent inorganic phosphate cotransporter), member 6, Slc12a5 - solute carrier family 12, member 5, Gria2 - glutamate receptor, ionotropic, ampa2 (alpha 2), Gria1 - glutamate receptor, ionotropic, ampa1 (alpha 1), Stab1 - stabilin 1, Panx2 - pannexin 2, Nrxn1 - neurexin i, Stxbp1 - synta…
GO:0042391	regulation of membrane potential	3.55e-22	4.14e-19	3.97	11164	300	600	64	[Igsf9b - immunoglobulin superfamily, member 9b, Shank2 - sh3/ankyrin domain gene 2, Myh14 - myosin, heavy polypeptide 14, Nlgn2 - neuroligin 2, Ntrk3 - neurotrophic tyrosine kinase, receptor, type 3, Gria1 - glutamate receptor, ionotropic, ampa1 (alpha 1), Kcna2 - potassium voltage-gated channel, shaker-related subfamily, member 2, Asic1 - acid-sensing (proton-gated) ion channel 1, Kcna1 - potas…
GO:0098916	anterograde trans-synaptic signaling	5.88e-22	6.31e-19	5.27	11164	166	600	47	[Glra1 - glycine receptor, alpha 1 subunit, Glrb - glycine receptor, beta subunit, Dlgap2 - discs, large (drosophila) homolog-associated protein 2, Slc17a6 - solute carrier family 17 (sodium-dependent inorganic phosphate cotransporter), member 6, Myo6 - myosin vi, Unc13a - unc-13 homolog a (c. elegans), Dlg2 - discs, large homolog 2 (drosophila), Slc12a5 - solute carrier family 12, member 5, Gabr…
GO:0007268	chemical synaptic transmission	5.88e-22	5.86e-19	5.27	11164	166	600	47	[Glra1 - glycine receptor, alpha 1 subunit, Glrb - glycine receptor, beta subunit, Dlgap2 - discs, large (drosophila) homolog-associated protein 2, Slc17a6 - solute carrier family 17 (sodium-dependent inorganic phosphate cotransporter), member 6, Myo6 - myosin vi, Unc13a - unc-13 homolog a (c. elegans), Dlg2 - discs, large homolog 2 (drosophila), Slc12a5 - solute carrier family 12, member 5, Gabr…
GO:0043269	regulation of ion transport	6.56e-22	6.11e-19	3.22	11164	474	600	82	[Shank2 - sh3/ankyrin domain gene 2, Camk2a - calcium/calmodulin-dependent protein kinase ii alpha, Rasgrf1 - ras protein-specific guanine nucleotide-releasing factor 1, Syt7 - synaptotagmin vii, Nlgn2 - neuroligin 2, P2ry12 - purinergic receptor p2y, g-protein coupled 12, Fam115a - family with sequence similarity 115, member a, Atp2b4 - atpase, ca++ transporting, plasma membrane 4, Nedd4 - neura…
GO:0001505	regulation of neurotransmitter levels	9.57e-21	8.35e-18	4.2	11164	248	600	56	[Camk2a - calcium/calmodulin-dependent protein kinase ii alpha, Syt7 - synaptotagmin vii, Agtpbp1 - atp/gtp binding protein 1, Slc17a6 - solute carrier family 17 (sodium-dependent inorganic phosphate cotransporter), member 6, Adcy1 - adenylate cyclase 1, Atp2b4 - atpase, ca++ transporting, plasma membrane 4, Asic1 - acid-sensing (proton-gated) ion channel 1, Pfn2 - profilin 2, Prkca - protein kin…
GO:0065008	regulation of biological quality	1.03e-20	8.47e-18	1.76	11164	2353	600	223	[Unc80 - unc-80 homolog (c. elegans), Camk2a - calcium/calmodulin-dependent protein kinase ii alpha, Myh14 - myosin, heavy polypeptide 14, Syt7 - synaptotagmin vii, Adcy1 - adenylate cyclase 1, Ntrk3 - neurotrophic tyrosine kinase, receptor, type 3, Slc12a5 - solute carrier family 12, member 5, Camk2b - calcium/calmodulin-dependent protein kinase ii, beta, Asic1 - acid-sensing (proton-gated) ion …
GO:0007154	cell communication	3.53e-20	2.74e-17	3.33	11164	402	600	72	[Grlf1 - glucocorticoid receptor dna binding factor 1, Dlgap2 - discs, large (drosophila) homolog-associated protein 2, Jag2 - jagged 2, Slc17a6 - solute carrier family 17 (sodium-dependent inorganic phosphate cotransporter), member 6, P2ry12 - purinergic receptor p2y, g-protein coupled 12, Slc12a5 - solute carrier family 12, member 5, Gria2 - glutamate receptor, ionotropic, ampa2 (alpha 2), Gria…
GO:0034765	regulation of ion transmembrane transport	2.56e-19	1.88e-16	3.62	11164	319	600	62	[Shank2 - sh3/ankyrin domain gene 2, Rasgrf1 - ras protein-specific guanine nucleotide-releasing factor 1, Nlgn2 - neuroligin 2, Fam115a - family with sequence similarity 115, member a, Atp2b4 - atpase, ca++ transporting, plasma membrane 4, Nedd4 - neural precursor cell expressed, developmentally down-regulated 4, Hk1 - hexokinase 1, Kcna2 - potassium voltage-gated channel, shaker-related subfami…
GO:0050808	synapse organization	2.41e-18	1.68e-15	4.76	11164	168	600	43	[Shank2 - sh3/ankyrin domain gene 2, Atp2b2 - atpase, ca++ transporting, plasma membrane 2, Ank3 - ankyrin 3, epithelial, Myo6 - myosin vi, Nlgn2 - neuroligin 2, Unc13a - unc-13 homolog a (c. elegans), Plxnb1 - plexin b1, Gabrg2 - gamma-aminobutyric acid (gaba) a receptor, subunit gamma 2, Myh10 - myosin, heavy polypeptide 10, non-muscle, Nedd4 - neural precursor cell expressed, developmentally d…
GO:0048167	regulation of synaptic plasticity	5.2e-18	3.45e-15	4.48	11164	187	600	45	[Atp2b2 - atpase, ca++ transporting, plasma membrane 2, Shank2 - sh3/ankyrin domain gene 2, Camk2a - calcium/calmodulin-dependent protein kinase ii alpha, Slc8a2 - solute carrier family 8 (sodium/calcium exchanger), member 2, Syt7 - synaptotagmin vii, Rasgrf1 - ras protein-specific guanine nucleotide-releasing factor 1, Myo6 - myosin vi, Adcy8 - adenylate cyclase 8, Unc13a - unc-13 homolog a (c. …
GO:0010975	regulation of neuron projection development	1.25e-17	7.92e-15	2.88	11164	498	600	77	[Shank2 - sh3/ankyrin domain gene 2, Grlf1 - glucocorticoid receptor dna binding factor 1, Aatk - apoptosis-associated tyrosine kinase, Gdi1 - guanosine diphosphate (gdp) dissociation inhibitor 1, Arhgap4 - rho gtpase activating protein 4, Fez1 - fasciculation and elongation protein zeta 1 (zygin i), Nlgn2 - neuroligin 2, Ntrk3 - neurotrophic tyrosine kinase, receptor, type 3, Camk2b - calcium/ca…
GO:0099643	signal release from synapse	6.61e-17	4.01e-14	8.27	11164	54	600	24	[Syt4 - synaptotagmin iv, Syt7 - synaptotagmin vii, Cadps - ca2+-dependent secretion activator, Ptprn2 - protein tyrosine phosphatase, receptor type, n polypeptide 2, Unc13a - unc-13 homolog a (c. elegans), Cacna1a - calcium channel, voltage-dependent, p/q type, alpha 1a subunit, Cacna1b - calcium channel, voltage-dependent, n type, alpha 1b subunit, Syn3 - synapsin iii, Rph3a - rabphilin 3a, Rim…
GO:0120035	regulation of plasma membrane bounded cell projection organization	1.1e-16	6.39e-14	2.57	11164	630	600	87	[Shank2 - sh3/ankyrin domain gene 2, Grlf1 - glucocorticoid receptor dna binding factor 1, Aatk - apoptosis-associated tyrosine kinase, Gdi1 - guanosine diphosphate (gdp) dissociation inhibitor 1, Arhgap4 - rho gtpase activating protein 4, Fez1 - fasciculation and elongation protein zeta 1 (zygin i), Nlgn2 - neuroligin 2, Ntrk3 - neurotrophic tyrosine kinase, receptor, type 3, P2ry12 - purinergic…
GO:0031344	regulation of cell projection organization	1.8e-16	1.01e-13	2.55	11164	635	600	87	[Shank2 - sh3/ankyrin domain gene 2, Grlf1 - glucocorticoid receptor dna binding factor 1, Aatk - apoptosis-associated tyrosine kinase, Gdi1 - guanosine diphosphate (gdp) dissociation inhibitor 1, Arhgap4 - rho gtpase activating protein 4, Fez1 - fasciculation and elongation protein zeta 1 (zygin i), Nlgn2 - neuroligin 2, Ntrk3 - neurotrophic tyrosine kinase, receptor, type 3, P2ry12 - purinergic…
GO:0098693	regulation of synaptic vesicle cycle	1.85e-16	9.95e-14	5.36	11164	118	600	34	[Camk2a - calcium/calmodulin-dependent protein kinase ii alpha, Syt7 - synaptotagmin vii, Myo6 - myosin vi, Nlgn2 - neuroligin 2, Unc13a - unc-13 homolog a (c. elegans), Adcy1 - adenylate cyclase 1, Stxbp5l - syntaxin binding protein 5-like, Pfn2 - profilin 2, Prkca - protein kinase c, alpha, Nrxn1 - neurexin i, Prkce - protein kinase c, epsilon, Stxbp1 - syntaxin binding protein 1, Nrxn3 - neure…
GO:0034762	regulation of transmembrane transport	1.87e-16	9.67e-14	3.11	11164	383	600	64	[Shank2 - sh3/ankyrin domain gene 2, Rasgrf1 - ras protein-specific guanine nucleotide-releasing factor 1, Nlgn2 - neuroligin 2, Fam115a - family with sequence similarity 115, member a, Atp2b4 - atpase, ca++ transporting, plasma membrane 4, Hk1 - hexokinase 1, Nedd4 - neural precursor cell expressed, developmentally down-regulated 4, Ahi1 - abelson helper integration site 1, Kcna2 - potassium vol…
GO:0046928	regulation of neurotransmitter secretion	5.64e-16	2.81e-13	5.71	11164	101	600	31	[Camk2a - calcium/calmodulin-dependent protein kinase ii alpha, Syt7 - synaptotagmin vii, Ica1 - islet cell autoantigen 1, Myo6 - myosin vi, Adcy1 - adenylate cyclase 1, Unc13a - unc-13 homolog a (c. elegans), Stxbp5l - syntaxin binding protein 5-like, Asic1 - acid-sensing (proton-gated) ion channel 1, Pfn2 - profilin 2, Prkca - protein kinase c, alpha, Prkce - protein kinase c, epsilon, Stxbp1 -…
GO:0045664	regulation of neuron differentiation	1.06e-15	5.11e-13	2.56	11164	595	600	82	[Shank2 - sh3/ankyrin domain gene 2, Grlf1 - glucocorticoid receptor dna binding factor 1, Aatk - apoptosis-associated tyrosine kinase, Gdi1 - guanosine diphosphate (gdp) dissociation inhibitor 1, Arhgap4 - rho gtpase activating protein 4, Fez1 - fasciculation and elongation protein zeta 1 (zygin i), Nlgn2 - neuroligin 2, Ntrk3 - neurotrophic tyrosine kinase, receptor, type 3, Camk2b - calcium/ca…
GO:0051960	regulation of nervous system development	1.07e-15	4.96e-13	2.31	11164	799	600	99	[Camk2a - calcium/calmodulin-dependent protein kinase ii alpha, Aatk - apoptosis-associated tyrosine kinase, Gdi1 - guanosine diphosphate (gdp) dissociation inhibitor 1, Nlgn2 - neuroligin 2, Ntrk3 - neurotrophic tyrosine kinase, receptor, type 3, P2ry12 - purinergic receptor p2y, g-protein coupled 12, Camk2b - calcium/calmodulin-dependent protein kinase ii, beta, Prkca - protein kinase c, alpha,…
GO:0051588	regulation of neurotransmitter transport	1.15e-15	5.17e-13	4.93	11164	132	600	35	[Camk2a - calcium/calmodulin-dependent protein kinase ii alpha, Syt7 - synaptotagmin vii, Ica1 - islet cell autoantigen 1, Myo6 - myosin vi, Unc13a - unc-13 homolog a (c. elegans), Adcy1 - adenylate cyclase 1, Stxbp5l - syntaxin binding protein 5-like, Abat - 4-aminobutyrate aminotransferase, Asic1 - acid-sensing (proton-gated) ion channel 1, Pfn2 - profilin 2, Prkca - protein kinase c, alpha, Ga…
GO:0048812	neuron projection morphogenesis	2.65e-15	1.16e-12	3.77	11164	227	600	46	[Grlf1 - glucocorticoid receptor dna binding factor 1, Shank2 - sh3/ankyrin domain gene 2, Celsr2 - cadherin, egf lag seven-pass g-type receptor 2 (flamingo homolog, drosophila), Camk2a - calcium/calmodulin-dependent protein kinase ii alpha, Atl1 - atlastin gtpase 1, Ank3 - ankyrin 3, epithelial, Nefh - neurofilament, heavy polypeptide, Adcy1 - adenylate cyclase 1, Plxnb1 - plexin b1, Mapk8ip2 - …
GO:0051179	localization	3.86e-15	1.63e-12	1.56	11164	2817	600	236	[Camk2a - calcium/calmodulin-dependent protein kinase ii alpha, Syt7 - synaptotagmin vii, Slc12a5 - solute carrier family 12, member 5, Camk2b - calcium/calmodulin-dependent protein kinase ii, beta, Camk2g - calcium/calmodulin-dependent protein kinase ii gamma, Asic1 - acid-sensing (proton-gated) ion channel 1, Nrxn1 - neurexin i, Stxbp1 - syntaxin binding protein 1, Lrrc7 - leucine rich repeat c…
GO:0001508	action potential	3.94e-15	1.62e-12	7.51	11164	57	600	23	[Myh14 - myosin, heavy polypeptide 14, Glra1 - glycine receptor, alpha 1 subunit, Ryr2 - ryanodine receptor 2, cardiac, Kcnd2 - potassium voltage-gated channel, shal-related family, member 2, Chrnb2 - cholinergic receptor, nicotinic, beta polypeptide 2 (neuronal), Ank3 - ankyrin 3, epithelial, Ntrk3 - neurotrophic tyrosine kinase, receptor, type 3, Dmd - dystrophin, muscular dystrophy, Cacna1c - …
GO:0048858	cell projection morphogenesis	4.38e-15	1.75e-12	3.66	11164	239	600	47	[Grlf1 - glucocorticoid receptor dna binding factor 1, Shank2 - sh3/ankyrin domain gene 2, Celsr2 - cadherin, egf lag seven-pass g-type receptor 2 (flamingo homolog, drosophila), Camk2a - calcium/calmodulin-dependent protein kinase ii alpha, Atl1 - atlastin gtpase 1, Ank3 - ankyrin 3, epithelial, Nefh - neurofilament, heavy polypeptide, Adcy1 - adenylate cyclase 1, Plxnb1 - plexin b1, Mapk8ip2 - …
GO:0032990	cell part morphogenesis	6.48e-15	2.51e-12	3.51	11164	260	600	49	[Shank2 - sh3/ankyrin domain gene 2, Celsr2 - cadherin, egf lag seven-pass g-type receptor 2 (flamingo homolog, drosophila), Grlf1 - glucocorticoid receptor dna binding factor 1, Myh14 - myosin, heavy polypeptide 14, Camk2a - calcium/calmodulin-dependent protein kinase ii alpha, Atl1 - atlastin gtpase 1, Fez1 - fasciculation and elongation protein zeta 1 (zygin i), Nefh - neurofilament, heavy pol…
GO:0120039	plasma membrane bounded cell projection morphogenesis	7.44e-15	2.81e-12	3.67	11164	233	600	46	[Grlf1 - glucocorticoid receptor dna binding factor 1, Shank2 - sh3/ankyrin domain gene 2, Celsr2 - cadherin, egf lag seven-pass g-type receptor 2 (flamingo homolog, drosophila), Camk2a - calcium/calmodulin-dependent protein kinase ii alpha, Atl1 - atlastin gtpase 1, Ank3 - ankyrin 3, epithelial, Nefh - neurofilament, heavy polypeptide, Adcy1 - adenylate cyclase 1, Plxnb1 - plexin b1, Mapk8ip2 - …
GO:0032501	multicellular organismal process	1.31e-14	4.81e-12	1.71	11164	1935	600	178	[Celsr2 - cadherin, egf lag seven-pass g-type receptor 2 (flamingo homolog, drosophila), Myh14 - myosin, heavy polypeptide 14, Unc5c - unc-5 homolog c (c. elegans), Nlgn2 - neuroligin 2, Ntrk3 - neurotrophic tyrosine kinase, receptor, type 3, Adcy1 - adenylate cyclase 1, P2ry12 - purinergic receptor p2y, g-protein coupled 12, Slc12a5 - solute carrier family 12, member 5, Camk2b - calcium/calmodul…
GO:0017158	regulation of calcium ion-dependent exocytosis	1.46e-14	5.24e-12	5.32	11164	105	600	30	[Camk2a - calcium/calmodulin-dependent protein kinase ii alpha, Syt7 - synaptotagmin vii, Cadps - ca2+-dependent secretion activator, Myo6 - myosin vi, Adcy1 - adenylate cyclase 1, Unc13a - unc-13 homolog a (c. elegans), Stxbp5l - syntaxin binding protein 5-like, Trim9 - tripartite motif-containing 9, Pfn2 - profilin 2, Prkca - protein kinase c, alpha, Prkce - protein kinase c, epsilon, Stxbp1 - …
GO:0065007	biological regulation	1.79e-14	6.24e-12	1.24	11164	6748	600	449	[Myh14 - myosin, heavy polypeptide 14, Aatk - apoptosis-associated tyrosine kinase, Cgnl1 - cingulin-like 1, Adcy1 - adenylate cyclase 1, Slc12a5 - solute carrier family 12, member 5, Camta1 - calmodulin binding transcription activator 1, Asic1 - acid-sensing (proton-gated) ion channel 1, Stxbp1 - syntaxin binding protein 1, Ppm1e - protein phosphatase 1e (pp2c domain containing), Zer1 - zyg-11 r…
GO:0006810	transport	2.09e-14	7.11e-12	1.62	11164	2329	600	203	[Camk2a - calcium/calmodulin-dependent protein kinase ii alpha, Syt7 - synaptotagmin vii, Slc12a5 - solute carrier family 12, member 5, Camk2b - calcium/calmodulin-dependent protein kinase ii, beta, Camk2g - calcium/calmodulin-dependent protein kinase ii gamma, Asic1 - acid-sensing (proton-gated) ion channel 1, Nrxn1 - neurexin i, Stxbp1 - syntaxin binding protein 1, Lrrc7 - leucine rich repeat c…
GO:0050807	regulation of synapse organization	2.09e-14	6.95e-12	3.64	11164	230	600	45	[Shank2 - sh3/ankyrin domain gene 2, Lphn1 - latrophilin 1, Ncan - neurocan, Camkv - cam kinase-like vesicle-associated, Nlgn2 - neuroligin 2, Ntrk3 - neurotrophic tyrosine kinase, receptor, type 3, Camk2b - calcium/calmodulin-dependent protein kinase ii, beta, Eef2k - eukaryotic elongation factor-2 kinase, Myh10 - myosin, heavy polypeptide 10, non-muscle, Nedd4 - neural precursor cell expressed,…
GO:0007626	locomotory behavior	2.83e-14	9.17e-12	4.16	11164	170	600	38	[Atp2b2 - atpase, ca++ transporting, plasma membrane 2, Glra1 - glycine receptor, alpha 1 subunit, Glrb - glycine receptor, beta subunit, Adam22 - a disintegrin and metallopeptidase domain 22, Agtpbp1 - atp/gtp binding protein 1, Myo6 - myosin vi, Adcy8 - adenylate cyclase 8, Nlgn2 - neuroligin 2, Gad1 - glutamate decarboxylase 1, Vps13a - vacuolar protein sorting 13a (yeast), Abat - 4-aminobutyr…
GO:0023061	signal release	3.5e-14	1.11e-11	5.54	11164	94	600	28	[Syt7 - synaptotagmin vii, Cadps - ca2+-dependent secretion activator, Unc13a - unc-13 homolog a (c. elegans), Syn3 - synapsin iii, Trim9 - tripartite motif-containing 9, Nrxn1 - neurexin i, Stxbp1 - syntaxin binding protein 1, Nrxn3 - neurexin iii, Nrxn2 - neurexin ii, Ppfia3 - protein tyrosine phosphatase, receptor type, f polypeptide (ptprf), interacting protein (liprin), alpha 3, Syt4 - synap…
GO:0050767	regulation of neurogenesis	3.71e-14	1.15e-11	2.31	11164	718	600	89	[Shank2 - sh3/ankyrin domain gene 2, Grlf1 - glucocorticoid receptor dna binding factor 1, Camk2a - calcium/calmodulin-dependent protein kinase ii alpha, Aatk - apoptosis-associated tyrosine kinase, Gdi1 - guanosine diphosphate (gdp) dissociation inhibitor 1, Arhgap4 - rho gtpase activating protein 4, Fez1 - fasciculation and elongation protein zeta 1 (zygin i), Nlgn2 - neuroligin 2, Ntrk3 - neur…
GO:0007611	learning or memory	4.2e-14	1.27e-11	3.64	11164	225	600	44	[Shank2 - sh3/ankyrin domain gene 2, Brinp1 - bone morphogenic protein/retinoic acid inducible neural specific 1, Slc8a2 - solute carrier family 8 (sodium/calcium exchanger), member 2, Adcy8 - adenylate cyclase 8, Adcy1 - adenylate cyclase 1, Slc12a5 - solute carrier family 12, member 5, Mapk8ip2 - mitogen-activated protein kinase 8 interacting protein 2, Gria1 - glutamate receptor, ionotropic, a…
GO:0010646	regulation of cell communication	5.31e-14	1.58e-11	1.64	11164	2178	600	192	[Camk2a - calcium/calmodulin-dependent protein kinase ii alpha, Dlgap2 - discs, large (drosophila) homolog-associated protein 2, Cgnl1 - cingulin-like 1, Syt7 - synaptotagmin vii, Nlgn2 - neuroligin 2, Ntrk3 - neurotrophic tyrosine kinase, receptor, type 3, Adcy1 - adenylate cyclase 1, P2ry12 - purinergic receptor p2y, g-protein coupled 12, Camk2b - calcium/calmodulin-dependent protein kinase ii,…
GO:0051234	establishment of localization	8.76e-14	2.55e-11	1.59	11164	2424	600	207	[Camk2a - calcium/calmodulin-dependent protein kinase ii alpha, Syt7 - synaptotagmin vii, Slc12a5 - solute carrier family 12, member 5, Camk2b - calcium/calmodulin-dependent protein kinase ii, beta, Camk2g - calcium/calmodulin-dependent protein kinase ii gamma, Asic1 - acid-sensing (proton-gated) ion channel 1, Nrxn1 - neurexin i, Stxbp1 - syntaxin binding protein 1, Lrrc7 - leucine rich repeat c…
GO:0023051	regulation of signaling	9.24e-14	2.63e-11	1.63	11164	2190	600	192	[Camk2a - calcium/calmodulin-dependent protein kinase ii alpha, Dlgap2 - discs, large (drosophila) homolog-associated protein 2, Cgnl1 - cingulin-like 1, Syt7 - synaptotagmin vii, Nlgn2 - neuroligin 2, Ntrk3 - neurotrophic tyrosine kinase, receptor, type 3, Adcy1 - adenylate cyclase 1, P2ry12 - purinergic receptor p2y, g-protein coupled 12, Camk2b - calcium/calmodulin-dependent protein kinase ii,…
GO:0098660	inorganic ion transmembrane transport	1.12e-13	3.12e-11	3.27	11164	279	600	49	[Slc25a23 - solute carrier family 25 (mitochondrial carrier; phosphate carrier), member 23, P2ry12 - purinergic receptor p2y, g-protein coupled 12, Slc12a5 - solute carrier family 12, member 5, Atp2b4 - atpase, ca++ transporting, plasma membrane 4, Slc4a10 - solute carrier family 4, sodium bicarbonate cotransporter-like, member 10, Asic1 - acid-sensing (proton-gated) ion channel 1, Kcna2 - potass…
GO:1903530	regulation of secretion by cell	1.21e-13	3.32e-11	2.5	11164	551	600	74	[Arrb1 - arrestin, beta 1, Camk2a - calcium/calmodulin-dependent protein kinase ii alpha, Syt7 - synaptotagmin vii, Nlgn2 - neuroligin 2, Adcy1 - adenylate cyclase 1, P2ry12 - purinergic receptor p2y, g-protein coupled 12, Myh10 - myosin, heavy polypeptide 10, non-muscle, Ahi1 - abelson helper integration site 1, Pfkm - phosphofructokinase, muscle, Hk1 - hexokinase 1, Kcna2 - potassium voltage-ga…
GO:2000300	regulation of synaptic vesicle exocytosis	1.79e-13	4.81e-11	5.89	11164	79	600	25	[Camk2a - calcium/calmodulin-dependent protein kinase ii alpha, Syt7 - synaptotagmin vii, Myo6 - myosin vi, Adcy1 - adenylate cyclase 1, Unc13a - unc-13 homolog a (c. elegans), Stxbp5l - syntaxin binding protein 5-like, Pfn2 - profilin 2, Prkca - protein kinase c, alpha, Prkce - protein kinase c, epsilon, Stxbp1 - syntaxin binding protein 1, Nrxn3 - neurexin iii, Prepl - prolyl endopeptidase-like…
GO:0051046	regulation of secretion	2.19e-13	5.77e-11	2.43	11164	581	600	76	[Arrb1 - arrestin, beta 1, Camk2a - calcium/calmodulin-dependent protein kinase ii alpha, Syt7 - synaptotagmin vii, Nlgn2 - neuroligin 2, Adcy1 - adenylate cyclase 1, P2ry12 - purinergic receptor p2y, g-protein coupled 12, Myh10 - myosin, heavy polypeptide 10, non-muscle, Ahi1 - abelson helper integration site 1, Pfkm - phosphofructokinase, muscle, Hk1 - hexokinase 1, Kcna2 - potassium voltage-ga…
GO:0060284	regulation of cell development	3.58e-13	9.25e-11	2.17	11164	797	600	93	[Grlf1 - glucocorticoid receptor dna binding factor 1, Shank2 - sh3/ankyrin domain gene 2, Camk2a - calcium/calmodulin-dependent protein kinase ii alpha, Aatk - apoptosis-associated tyrosine kinase, Gdi1 - guanosine diphosphate (gdp) dissociation inhibitor 1, Arhgap4 - rho gtpase activating protein 4, Fez1 - fasciculation and elongation protein zeta 1 (zygin i), Nlgn2 - neuroligin 2, Ntrk3 - neur…
GO:0007269	neurotransmitter secretion	3.83e-13	9.71e-11	9.04	11164	35	600	17	[Syt4 - synaptotagmin iv, Ptprn2 - protein tyrosine phosphatase, receptor type, n polypeptide 2, Unc13a - unc-13 homolog a (c. elegans), Cacna1b - calcium channel, voltage-dependent, n type, alpha 1b subunit, Syn3 - synapsin iii, Rph3a - rabphilin 3a, Rims2 - regulating synaptic membrane exocytosis 2, Brsk1 - br serine/threonine kinase 1, Nrxn1 - neurexin i, Stxbp1 - syntaxin binding protein 1, S…
GO:1902803	regulation of synaptic vesicle transport	6.33e-13	1.58e-10	5.6	11164	83	600	25	[Camk2a - calcium/calmodulin-dependent protein kinase ii alpha, Syt7 - synaptotagmin vii, Myo6 - myosin vi, Adcy1 - adenylate cyclase 1, Unc13a - unc-13 homolog a (c. elegans), Stxbp5l - syntaxin binding protein 5-like, Pfn2 - profilin 2, Prkca - protein kinase c, alpha, Prkce - protein kinase c, epsilon, Stxbp1 - syntaxin binding protein 1, Nrxn3 - neurexin iii, Prepl - prolyl endopeptidase-like…
GO:0050890	cognition	6.43e-13	1.58e-10	3.32	11164	252	600	45	[Shank2 - sh3/ankyrin domain gene 2, Brinp1 - bone morphogenic protein/retinoic acid inducible neural specific 1, Slc8a2 - solute carrier family 8 (sodium/calcium exchanger), member 2, Adcy8 - adenylate cyclase 8, Adcy1 - adenylate cyclase 1, Slc12a5 - solute carrier family 12, member 5, Mapk8ip2 - mitogen-activated protein kinase 8 interacting protein 2, Gria1 - glutamate receptor, ionotropic, a…
GO:0050905	neuromuscular process	8.6e-13	2.07e-10	5.32	11164	91	600	26	[Atp2b2 - atpase, ca++ transporting, plasma membrane 2, Glra1 - glycine receptor, alpha 1 subunit, Glrb - glycine receptor, beta subunit, Agtpbp1 - atp/gtp binding protein 1, Nlgn2 - neuroligin 2, Camk2b - calcium/calmodulin-dependent protein kinase ii, beta, Myh10 - myosin, heavy polypeptide 10, non-muscle, Camta1 - calmodulin binding transcription activator 1, Dlg4 - discs, large homolog 4 (dro…
GO:0022604	regulation of cell morphogenesis	9.06e-13	2.14e-10	2.63	11164	445	600	63	[Grlf1 - glucocorticoid receptor dna binding factor 1, Myh14 - myosin, heavy polypeptide 14, Aatk - apoptosis-associated tyrosine kinase, Gdi1 - guanosine diphosphate (gdp) dissociation inhibitor 1, Arhgap4 - rho gtpase activating protein 4, Ntrk3 - neurotrophic tyrosine kinase, receptor, type 3, Camk2b - calcium/calmodulin-dependent protein kinase ii, beta, Rhobtb1 - rho-related btb domain conta…
GO:0006811	ion transport	9.13e-13	2.12e-10	2.26	11164	683	600	83	[Slc25a23 - solute carrier family 25 (mitochondrial carrier; phosphate carrier), member 23, Camk2a - calcium/calmodulin-dependent protein kinase ii alpha, Folr2 - folate receptor 2 (fetal), Slc17a6 - solute carrier family 17 (sodium-dependent inorganic phosphate cotransporter), member 6, P2ry12 - purinergic receptor p2y, g-protein coupled 12, Slc12a5 - solute carrier family 12, member 5, Slc4a4 -…
GO:0035418	protein localization to synapse	1.52e-12	3.47e-10	7.37	11164	48	600	19	[Map1a - microtubule-associated protein 1 a, Adam22 - a disintegrin and metallopeptidase domain 22, Nlgn2 - neuroligin 2, Pclo - piccolo (presynaptic cytomatrix protein), Dlg2 - discs, large homolog 2 (drosophila), Arhgap44 - rho gtpase activating protein 44, Dlg4 - discs, large homolog 4 (drosophila), Mapk8ip3 - mitogen-activated protein kinase 8 interacting protein 3, Nrxn1 - neurexin i, Kalrn …
GO:0010769	regulation of cell morphogenesis involved in differentiation	1.66e-12	3.74e-10	3.05	11164	299	600	49	[Grlf1 - glucocorticoid receptor dna binding factor 1, Aatk - apoptosis-associated tyrosine kinase, Gdi1 - guanosine diphosphate (gdp) dissociation inhibitor 1, Arhgap4 - rho gtpase activating protein 4, Ntrk3 - neurotrophic tyrosine kinase, receptor, type 3, Camk2b - calcium/calmodulin-dependent protein kinase ii, beta, Nedd4 - neural precursor cell expressed, developmentally down-regulated 4, C…
GO:0060627	regulation of vesicle-mediated transport	1.66e-12	3.69e-10	2.6	11164	451	600	63	[Arrb1 - arrestin, beta 1, Camk2a - calcium/calmodulin-dependent protein kinase ii alpha, Syt7 - synaptotagmin vii, Adcy1 - adenylate cyclase 1, Ahi1 - abelson helper integration site 1, Nedd4 - neural precursor cell expressed, developmentally down-regulated 4, Pfn2 - profilin 2, Prkca - protein kinase c, alpha, Prkce - protein kinase c, epsilon, Stxbp1 - syntaxin binding protein 1, Nrxn3 - neure…
GO:0030001	metal ion transport	2.49e-12	5.43e-10	2.83	11164	355	600	54	[Slc25a23 - solute carrier family 25 (mitochondrial carrier; phosphate carrier), member 23, Camk2a - calcium/calmodulin-dependent protein kinase ii alpha, Slc17a6 - solute carrier family 17 (sodium-dependent inorganic phosphate cotransporter), member 6, Slc12a5 - solute carrier family 12, member 5, P2ry12 - purinergic receptor p2y, g-protein coupled 12, Slc4a4 - solute carrier family 4 (anion exc…
GO:0060341	regulation of cellular localization	3.25e-12	6.97e-10	2.16	11164	750	600	87	[Arrb1 - arrestin, beta 1, Camk2a - calcium/calmodulin-dependent protein kinase ii alpha, Gdi1 - guanosine diphosphate (gdp) dissociation inhibitor 1, Fez1 - fasciculation and elongation protein zeta 1 (zygin i), Syt7 - synaptotagmin vii, Sec16b - sec16 homolog b (s. cerevisiae), Nefh - neurofilament, heavy polypeptide, Nlgn2 - neuroligin 2, Adcy1 - adenylate cyclase 1, Fam115a - family with sequ…
GO:0007612	learning	3.32e-12	7.02e-10	4.27	11164	135	600	31	[Shank2 - sh3/ankyrin domain gene 2, Slc8a2 - solute carrier family 8 (sodium/calcium exchanger), member 2, Slc12a5 - solute carrier family 12, member 5, Mapk8ip2 - mitogen-activated protein kinase 8 interacting protein 2, Asic1 - acid-sensing (proton-gated) ion channel 1, Npas4 - neuronal pas domain protein 4, Ndrg4 - n-myc downstream regulated gene 4, Nrxn1 - neurexin i, Kalrn - kalirin, rhogef…
GO:0017157	regulation of exocytosis	3.87e-12	8.06e-10	3.66	11164	188	600	37	[Camk2a - calcium/calmodulin-dependent protein kinase ii alpha, Cadps - ca2+-dependent secretion activator, Syt7 - synaptotagmin vii, Myo6 - myosin vi, Unc13a - unc-13 homolog a (c. elegans), Adcy1 - adenylate cyclase 1, Stxbp5l - syntaxin binding protein 5-like, Trim9 - tripartite motif-containing 9, Pfn2 - profilin 2, Prkca - protein kinase c, alpha, Stxbp1 - syntaxin binding protein 1, Prkce -…
GO:0030534	adult behavior	4.26e-12	8.75e-10	4.36	11164	128	600	30	[Shank2 - sh3/ankyrin domain gene 2, Unc79 - unc-79 homolog (c. elegans), Glra1 - glycine receptor, alpha 1 subunit, Glrb - glycine receptor, beta subunit, Adam22 - a disintegrin and metallopeptidase domain 22, Agtpbp1 - atp/gtp binding protein 1, Nlgn2 - neuroligin 2, Gabrg2 - gamma-aminobutyric acid (gaba) a receptor, subunit gamma 2, Abat - 4-aminobutyrate aminotransferase, Zfhx2 - zinc finger…
GO:0050806	positive regulation of synaptic transmission	5.02e-12	1.01e-09	4.21	11164	137	600	31	[Igsf9b - immunoglobulin superfamily, member 9b, Shank2 - sh3/ankyrin domain gene 2, Slc8a2 - solute carrier family 8 (sodium/calcium exchanger), member 2, Syt7 - synaptotagmin vii, Adcy8 - adenylate cyclase 8, Nlgn2 - neuroligin 2, Unc13a - unc-13 homolog a (c. elegans), Adcy1 - adenylate cyclase 1, Camk2b - calcium/calmodulin-dependent protein kinase ii, beta, Gria2 - glutamate receptor, ionotr…
GO:0007416	synapse assembly	5.52e-12	1.1e-09	6.53	11164	57	600	20	[Shank2 - sh3/ankyrin domain gene 2, Clstn3 - calsyntenin 3, Dnm3 - dynamin 3, Nlgn2 - neuroligin 2, Myo6 - myosin vi, Pclo - piccolo (presynaptic cytomatrix protein), Plxnb1 - plexin b1, Cacna1a - calcium channel, voltage-dependent, p/q type, alpha 1a subunit, Gabrg2 - gamma-aminobutyric acid (gaba) a receptor, subunit gamma 2, Gabrb3 - gamma-aminobutyric acid (gaba) a receptor, subunit beta 3, …
GO:1903305	regulation of regulated secretory pathway	7.52e-12	1.48e-09	4.15	11164	139	600	31	[Camk2a - calcium/calmodulin-dependent protein kinase ii alpha, Syt7 - synaptotagmin vii, Cadps - ca2+-dependent secretion activator, Myo6 - myosin vi, Adcy1 - adenylate cyclase 1, Unc13a - unc-13 homolog a (c. elegans), Stxbp5l - syntaxin binding protein 5-like, Trim9 - tripartite motif-containing 9, Pfn2 - profilin 2, Prkca - protein kinase c, alpha, Stxbp1 - syntaxin binding protein 1, Prkce -…
GO:0097479	synaptic vesicle localization	1.01e-11	1.95e-09	6.01	11164	65	600	21	[Madd - map-kinase activating death domain, Syt4 - synaptotagmin iv, Syt7 - synaptotagmin vii, Cadps - ca2+-dependent secretion activator, Pclo - piccolo (presynaptic cytomatrix protein), Unc13a - unc-13 homolog a (c. elegans), Ap3b2 - adaptor-related protein complex 3, beta 2 subunit, Cacna1a - calcium channel, voltage-dependent, p/q type, alpha 1a subunit, Syn3 - synapsin iii, Rims2 - regulatin…
GO:0098662	inorganic cation transmembrane transport	1.55e-11	2.96e-09	3.14	11164	255	600	43	[Kcnq2 - potassium voltage-gated channel, subfamily q, member 2, Atp2b2 - atpase, ca++ transporting, plasma membrane 2, Slc25a23 - solute carrier family 25 (mitochondrial carrier; phosphate carrier), member 23, Slc8a2 - solute carrier family 8 (sodium/calcium exchanger), member 2, Hcn1 - hyperpolarization-activated, cyclic nucleotide-gated k+ 1, Slc12a5 - solute carrier family 12, member 5, P2ry1…
GO:0032412	regulation of ion transmembrane transporter activity	1.82e-11	3.43e-09	3.64	11164	179	600	35	[Shank2 - sh3/ankyrin domain gene 2, Ehd3 - eh-domain containing 3, Rasgrf1 - ras protein-specific guanine nucleotide-releasing factor 1, Ank3 - ankyrin 3, epithelial, Nlgn2 - neuroligin 2, Hcn1 - hyperpolarization-activated, cyclic nucleotide-gated k+ 1, Dmd - dystrophin, muscular dystrophy, Fam115a - family with sequence similarity 115, member a, Mapk8ip2 - mitogen-activated protein kinase 8 in…
GO:0006812	cation transport	2.19e-11	4.07e-09	2.52	11164	443	600	60	[Camk2a - calcium/calmodulin-dependent protein kinase ii alpha, Slc25a23 - solute carrier family 25 (mitochondrial carrier; phosphate carrier), member 23, Slc17a6 - solute carrier family 17 (sodium-dependent inorganic phosphate cotransporter), member 6, Slc4a4 - solute carrier family 4 (anion exchanger), member 4, Slc12a5 - solute carrier family 12, member 5, P2ry12 - purinergic receptor p2y, g-p…
GO:0060078	regulation of postsynaptic membrane potential	2.63e-11	4.84e-09	6.84	11164	49	600	18	[Sez6 - seizure related gene 6, Glra1 - glycine receptor, alpha 1 subunit, Rgs7 - regulator of g protein signaling 7, Begain - brain-enriched guanylate kinase-associated, Adrb2 - adrenergic receptor, beta 2, Gabrg2 - gamma-aminobutyric acid (gaba) a receptor, subunit gamma 2, Mapk8ip2 - mitogen-activated protein kinase 8 interacting protein 2, Gria1 - glutamate receptor, ionotropic, ampa1 (alpha …
GO:0030030	cell projection organization	3.03e-11	5.5e-09	2.15	11164	691	600	80	[Celsr2 - cadherin, egf lag seven-pass g-type receptor 2 (flamingo homolog, drosophila), Shank2 - sh3/ankyrin domain gene 2, Grlf1 - glucocorticoid receptor dna binding factor 1, Camk2a - calcium/calmodulin-dependent protein kinase ii alpha, Atl1 - atlastin gtpase 1, Rasgrf1 - ras protein-specific guanine nucleotide-releasing factor 1, Nefh - neurofilament, heavy polypeptide, Adcy1 - adenylate cy…
GO:0007600	sensory perception	3.31e-11	5.92e-09	3.49	11164	192	600	36	[Atp2b2 - atpase, ca++ transporting, plasma membrane 2, Myh14 - myosin, heavy polypeptide 14, Glra1 - glycine receptor, alpha 1 subunit, Glrb - glycine receptor, beta subunit, Jag2 - jagged 2, Myo6 - myosin vi, Nlgn2 - neuroligin 2, Dlg2 - discs, large homolog 2 (drosophila), Gabrb3 - gamma-aminobutyric acid (gaba) a receptor, subunit beta 3, Asic1 - acid-sensing (proton-gated) ion channel 1, Kcn…
GO:0034220	ion transmembrane transport	3.46e-11	6.11e-09	2.71	11164	357	600	52	[Slc25a23 - solute carrier family 25 (mitochondrial carrier; phosphate carrier), member 23, Folr2 - folate receptor 2 (fetal), P2ry12 - purinergic receptor p2y, g-protein coupled 12, Slc12a5 - solute carrier family 12, member 5, Atp2b4 - atpase, ca++ transporting, plasma membrane 4, Slc4a10 - solute carrier family 4, sodium bicarbonate cotransporter-like, member 10, Asic1 - acid-sensing (proton-g…
GO:0032989	cellular component morphogenesis	3.73e-11	6.5e-09	2.56	11164	414	600	57	[Celsr2 - cadherin, egf lag seven-pass g-type receptor 2 (flamingo homolog, drosophila), Shank2 - sh3/ankyrin domain gene 2, Grlf1 - glucocorticoid receptor dna binding factor 1, Myh14 - myosin, heavy polypeptide 14, Camk2a - calcium/calmodulin-dependent protein kinase ii alpha, Atl1 - atlastin gtpase 1, Fez1 - fasciculation and elongation protein zeta 1 (zygin i), Nefh - neurofilament, heavy pol…
GO:0032409	regulation of transporter activity	3.87e-11	6.66e-09	3.47	11164	193	600	36	[Shank2 - sh3/ankyrin domain gene 2, Ehd3 - eh-domain containing 3, Rasgrf1 - ras protein-specific guanine nucleotide-releasing factor 1, Ank3 - ankyrin 3, epithelial, Nlgn2 - neuroligin 2, Hcn1 - hyperpolarization-activated, cyclic nucleotide-gated k+ 1, Fam115a - family with sequence similarity 115, member a, Dmd - dystrophin, muscular dystrophy, Mapk8ip2 - mitogen-activated protein kinase 8 in…
GO:0022898	regulation of transmembrane transporter activity	4.81e-11	8.19e-09	3.52	11164	185	600	35	[Shank2 - sh3/ankyrin domain gene 2, Ehd3 - eh-domain containing 3, Rasgrf1 - ras protein-specific guanine nucleotide-releasing factor 1, Ank3 - ankyrin 3, epithelial, Nlgn2 - neuroligin 2, Hcn1 - hyperpolarization-activated, cyclic nucleotide-gated k+ 1, Dmd - dystrophin, muscular dystrophy, Fam115a - family with sequence similarity 115, member a, Mapk8ip2 - mitogen-activated protein kinase 8 in…
GO:1904062	regulation of cation transmembrane transport	6.91e-11	1.16e-08	3.15	11164	236	600	40	[Shank2 - sh3/ankyrin domain gene 2, Ehd3 - eh-domain containing 3, Rasgrf1 - ras protein-specific guanine nucleotide-releasing factor 1, Ank3 - ankyrin 3, epithelial, Nlgn2 - neuroligin 2, Hcn1 - hyperpolarization-activated, cyclic nucleotide-gated k+ 1, Dmd - dystrophin, muscular dystrophy, Mapk8ip2 - mitogen-activated protein kinase 8 interacting protein 2, Atp2b4 - atpase, ca++ transporting, …
GO:0006836	neurotransmitter transport	7.55e-11	1.25e-08	4.61	11164	101	600	25	[Ica1 - islet cell autoantigen 1, Slc17a6 - solute carrier family 17 (sodium-dependent inorganic phosphate cotransporter), member 6, Unc13a - unc-13 homolog a (c. elegans), Syn3 - synapsin iii, Nrxn1 - neurexin i, Stxbp1 - syntaxin binding protein 1, Gabra2 - gamma-aminobutyric acid (gaba) a receptor, subunit alpha 2, Nrxn3 - neurexin iii, Sv2a - synaptic vesicle glycoprotein 2 a, Nrxn2 - neurexi…
GO:0051050	positive regulation of transport	1.17e-10	1.93e-08	2.07	11164	736	600	82	[Arrb1 - arrestin, beta 1, Camk2a - calcium/calmodulin-dependent protein kinase ii alpha, Fez1 - fasciculation and elongation protein zeta 1 (zygin i), Syt7 - synaptotagmin vii, Sec16b - sec16 homolog b (s. cerevisiae), Nlgn2 - neuroligin 2, P2ry12 - purinergic receptor p2y, g-protein coupled 12, Fam115a - family with sequence similarity 115, member a, Myh10 - myosin, heavy polypeptide 10, non-mu…
GO:0098655	cation transmembrane transport	1.19e-10	1.93e-08	2.95	11164	271	600	43	[Kcnq2 - potassium voltage-gated channel, subfamily q, member 2, Atp2b2 - atpase, ca++ transporting, plasma membrane 2, Slc25a23 - solute carrier family 25 (mitochondrial carrier; phosphate carrier), member 23, Slc8a2 - solute carrier family 8 (sodium/calcium exchanger), member 2, Hcn1 - hyperpolarization-activated, cyclic nucleotide-gated k+ 1, Slc12a5 - solute carrier family 12, member 5, P2ry1…
GO:0099003	vesicle-mediated transport in synapse	1.19e-10	1.91e-08	4.52	11164	103	600	25	[Syt7 - synaptotagmin vii, Cadps - ca2+-dependent secretion activator, Nlgn2 - neuroligin 2, Myo6 - myosin vi, Unc13a - unc-13 homolog a (c. elegans), Trim9 - tripartite motif-containing 9, Stxbp1 - syntaxin binding protein 1, Kif5a - kinesin family member 5a, Kif5c - kinesin family member 5c, Ppfia3 - protein tyrosine phosphatase, receptor type, f polypeptide (ptprf), interacting protein (liprin…
GO:0050789	regulation of biological process	1.3e-10	2.06e-08	1.21	11164	6425	600	419	[Myh14 - myosin, heavy polypeptide 14, Aatk - apoptosis-associated tyrosine kinase, Cgnl1 - cingulin-like 1, Adcy1 - adenylate cyclase 1, Camta1 - calmodulin binding transcription activator 1, Asic1 - acid-sensing (proton-gated) ion channel 1, Stxbp1 - syntaxin binding protein 1, Ppm1e - protein phosphatase 1e (pp2c domain containing), Zer1 - zyg-11 related, cell cycle regulator, Madd - map-kinas…
GO:0051648	vesicle localization	1.81e-10	2.84e-08	4.28	11164	113	600	26	[Syt7 - synaptotagmin vii, Cadps - ca2+-dependent secretion activator, Unc13a - unc-13 homolog a (c. elegans), Syn3 - synapsin iii, Kif1a - kinesin family member 1a, Trim9 - tripartite motif-containing 9, Kif1b - kinesin family member 1b, Nrxn1 - neurexin i, Kif5a - kinesin family member 5a, Kif5c - kinesin family member 5c, Ppfia3 - protein tyrosine phosphatase, receptor type, f polypeptide (ptp…
GO:0022603	regulation of anatomical structure morphogenesis	2.63e-10	4.08e-08	2.04	11164	748	600	82	[Grlf1 - glucocorticoid receptor dna binding factor 1, Myh14 - myosin, heavy polypeptide 14, Aatk - apoptosis-associated tyrosine kinase, Gdi1 - guanosine diphosphate (gdp) dissociation inhibitor 1, Arhgap4 - rho gtpase activating protein 4, Ntrk3 - neurotrophic tyrosine kinase, receptor, type 3, Eng - endoglin, Camk2b - calcium/calmodulin-dependent protein kinase ii, beta, Rhobtb1 - rho-related …
GO:0035176	social behavior	3.71e-10	5.69e-08	7.34	11164	38	600	15	[Shank2 - sh3/ankyrin domain gene 2, Brinp1 - bone morphogenic protein/retinoic acid inducible neural specific 1, Sept5 - septin 5, Chrnb2 - cholinergic receptor, nicotinic, beta polypeptide 2 (neuronal), Nlgn2 - neuroligin 2, Gad1 - glutamate decarboxylase 1, Vps13a - vacuolar protein sorting 13a (yeast), Mapk8ip2 - mitogen-activated protein kinase 8 interacting protein 2, Dlg4 - discs, large ho…
GO:0051703	intraspecies interaction between organisms	3.71e-10	5.62e-08	7.34	11164	38	600	15	[Shank2 - sh3/ankyrin domain gene 2, Brinp1 - bone morphogenic protein/retinoic acid inducible neural specific 1, Sept5 - septin 5, Chrnb2 - cholinergic receptor, nicotinic, beta polypeptide 2 (neuronal), Nlgn2 - neuroligin 2, Gad1 - glutamate decarboxylase 1, Vps13a - vacuolar protein sorting 13a (yeast), Mapk8ip2 - mitogen-activated protein kinase 8 interacting protein 2, Dlg4 - discs, large ho…
GO:0055085	transmembrane transport	3.72e-10	5.59e-08	2.24	11164	548	600	66	[Slc25a23 - solute carrier family 25 (mitochondrial carrier; phosphate carrier), member 23, Folr2 - folate receptor 2 (fetal), Slc17a6 - solute carrier family 17 (sodium-dependent inorganic phosphate cotransporter), member 6, Slc29a4 - solute carrier family 29 (nucleoside transporters), member 4, Slc12a5 - solute carrier family 12, member 5, P2ry12 - purinergic receptor p2y, g-protein coupled 12,…
GO:0050773	regulation of dendrite development	3.78e-10	5.61e-08	3.5	11164	170	600	32	[Shank2 - sh3/ankyrin domain gene 2, Syne1 - spectrin repeat containing, nuclear envelope 1, Nlgn2 - neuroligin 2, Camk2b - calcium/calmodulin-dependent protein kinase ii, beta, Eef2k - eukaryotic elongation factor-2 kinase, Nedd4 - neural precursor cell expressed, developmentally down-regulated 4, Kalrn - kalirin, rhogef kinase, Ptprs - protein tyrosine phosphatase, receptor type, s, Lzts1 - leu…
GO:0019228	neuronal action potential	4.09e-10	6.01e-08	9.71	11164	23	600	12	[Scn2a1 - sodium channel, voltage-gated, type ii, alpha 1, Myh14 - myosin, heavy polypeptide 14, Kcna2 - potassium voltage-gated channel, shaker-related subfamily, member 2, Kcna1 - potassium voltage-gated channel, shaker-related subfamily, member 1, Dpp6 - dipeptidylpeptidase 6, Cacna1i - calcium channel, voltage-dependent, alpha 1i subunit, Kcnd2 - potassium voltage-gated channel, shal-related …
GO:0048814	regulation of dendrite morphogenesis	8.58e-10	1.25e-07	4.29	11164	104	600	24	[Itpka - inositol 1,4,5-trisphosphate 3-kinase a, Ptprd - protein tyrosine phosphatase, receptor type, d, Dnm3 - dynamin 3, Chrnb2 - cholinergic receptor, nicotinic, beta polypeptide 2 (neuronal), Srcin1 - src kinase signaling inhibitor 1, Syne1 - spectrin repeat containing, nuclear envelope 1, Dbn1 - drebrin 1, Ngef - neuronal guanine nucleotide exchange factor, Sipa1l1 - signal-induced prolifer…
GO:0017156	calcium ion regulated exocytosis	8.73e-10	1.26e-07	6.47	11164	46	600	16	[Syt4 - synaptotagmin iv, Syt7 - synaptotagmin vii, Cadps - ca2+-dependent secretion activator, Unc13a - unc-13 homolog a (c. elegans), Cacna1a - calcium channel, voltage-dependent, p/q type, alpha 1a subunit, Cacna1c - calcium channel, voltage-dependent, l type, alpha 1c subunit, Rims2 - regulating synaptic membrane exocytosis 2, Trim9 - tripartite motif-containing 9, Sptbn2 - spectrin beta, non…
GO:0051056	regulation of small GTPase mediated signal transduction	1.18e-09	1.68e-07	3.15	11164	207	600	35	[Grlf1 - glucocorticoid receptor dna binding factor 1, Arrb1 - arrestin, beta 1, Cgnl1 - cingulin-like 1, Arhgef17 - rho guanine nucleotide exchange factor (gef) 17, Rasgrf1 - ras protein-specific guanine nucleotide-releasing factor 1, D10Bwg1379e - dna segment, chr 10, brigham & women's genetics 1379 expressed, Trio - triple functional domain (ptprf interacting), Garnl3 - gtpase activating ranga…
GO:0050794	regulation of cellular process	1.34e-09	1.89e-07	1.22	11164	6078	600	397	[Myh14 - myosin, heavy polypeptide 14, Aatk - apoptosis-associated tyrosine kinase, Cgnl1 - cingulin-like 1, Adcy1 - adenylate cyclase 1, Camta1 - calmodulin binding transcription activator 1, Asic1 - acid-sensing (proton-gated) ion channel 1, Stxbp1 - syntaxin binding protein 1, Ppm1e - protein phosphatase 1e (pp2c domain containing), Zer1 - zyg-11 related, cell cycle regulator, Madd - map-kinas…
GO:0022610	biological adhesion	1.34e-09	1.88e-07	2.3	11164	478	600	59	[Celsr2 - cadherin, egf lag seven-pass g-type receptor 2 (flamingo homolog, drosophila), Igsf9b - immunoglobulin superfamily, member 9b, Gbp7 - guanylate binding protein 7, Cadm3 - cell adhesion molecule 3, Nlgn2 - neuroligin 2, P2ry12 - purinergic receptor p2y, g-protein coupled 12, Eng - endoglin, Myh10 - myosin, heavy polypeptide 10, non-muscle, Stab1 - stabilin 1, Prkca - protein kinase c, al…
GO:0046903	secretion	1.58e-09	2.18e-07	2.62	11164	327	600	46	[Atp2b2 - atpase, ca++ transporting, plasma membrane 2, Celsr2 - cadherin, egf lag seven-pass g-type receptor 2 (flamingo homolog, drosophila), Syt7 - synaptotagmin vii, Cadps - ca2+-dependent secretion activator, Myo6 - myosin vi, Unc13a - unc-13 homolog a (c. elegans), Stxbp5l - syntaxin binding protein 5-like, Eng - endoglin, Syn3 - synapsin iii, Myh10 - myosin, heavy polypeptide 10, non-muscl…
GO:0007165	signal transduction	1.73e-09	2.37e-07	1.51	11164	2113	600	172	[Celsr2 - cadherin, egf lag seven-pass g-type receptor 2 (flamingo homolog, drosophila), Plcxd3 - phosphatidylinositol-specific phospholipase c, x domain containing 3, Camk2a - calcium/calmodulin-dependent protein kinase ii alpha, Aatk - apoptosis-associated tyrosine kinase, Unc5c - unc-5 homolog c (c. elegans), Gdi1 - guanosine diphosphate (gdp) dissociation inhibitor 1, Ntrk3 - neurotrophic tyr…
GO:0099175	regulation of postsynapse organization	1.77e-09	2.39e-07	4.01	11164	116	600	25	[Ntrk3 - neurotrophic tyrosine kinase, receptor, type 3, Camk2b - calcium/calmodulin-dependent protein kinase ii, beta, Eef2k - eukaryotic elongation factor-2 kinase, Ptprs - protein tyrosine phosphatase, receptor type, s, Kalrn - kalirin, rhogef kinase, Nrxn1 - neurexin i, Itpka - inositol 1,4,5-trisphosphate 3-kinase a, Ptprd - protein tyrosine phosphatase, receptor type, d, Dnm3 - dynamin 3, L…
GO:0007613	memory	1.77e-09	2.37e-07	4.01	11164	116	600	25	[Shank2 - sh3/ankyrin domain gene 2, Slc8a2 - solute carrier family 8 (sodium/calcium exchanger), member 2, Brinp1 - bone morphogenic protein/retinoic acid inducible neural specific 1, Adcy8 - adenylate cyclase 8, Adcy1 - adenylate cyclase 1, Gria1 - glutamate receptor, ionotropic, ampa1 (alpha 1), Scn2a1 - sodium channel, voltage-gated, type ii, alpha 1, Asic1 - acid-sensing (proton-gated) ion c…
GO:0007155	cell adhesion	2.22e-09	2.95e-07	2.29	11164	472	600	58	[Celsr2 - cadherin, egf lag seven-pass g-type receptor 2 (flamingo homolog, drosophila), Igsf9b - immunoglobulin superfamily, member 9b, Cadm3 - cell adhesion molecule 3, Nlgn2 - neuroligin 2, P2ry12 - purinergic receptor p2y, g-protein coupled 12, Eng - endoglin, Myh10 - myosin, heavy polypeptide 10, non-muscle, Stab1 - stabilin 1, Prkca - protein kinase c, alpha, Nrxn1 - neurexin i, Prkce - pro…
GO:0015672	monovalent inorganic cation transport	2.51e-09	3.31e-07	3.33	11164	173	600	31	[Kcnq2 - potassium voltage-gated channel, subfamily q, member 2, Slc8a2 - solute carrier family 8 (sodium/calcium exchanger), member 2, Slc17a6 - solute carrier family 17 (sodium-dependent inorganic phosphate cotransporter), member 6, Ank1 - ankyrin 1, erythroid, Hcn1 - hyperpolarization-activated, cyclic nucleotide-gated k+ 1, Slc12a5 - solute carrier family 12, member 5, P2ry12 - purinergic rec…
GO:0051962	positive regulation of nervous system development	2.55e-09	3.32e-07	2.26	11164	486	600	59	[Grlf1 - glucocorticoid receptor dna binding factor 1, Shank2 - sh3/ankyrin domain gene 2, Gdi1 - guanosine diphosphate (gdp) dissociation inhibitor 1, Fez1 - fasciculation and elongation protein zeta 1 (zygin i), Nlgn2 - neuroligin 2, Ntrk3 - neurotrophic tyrosine kinase, receptor, type 3, P2ry12 - purinergic receptor p2y, g-protein coupled 12, Camk2b - calcium/calmodulin-dependent protein kinas…
GO:2001257	regulation of cation channel activity	2.57e-09	3.33e-07	3.94	11164	118	600	25	[Shank2 - sh3/ankyrin domain gene 2, Ehd3 - eh-domain containing 3, Rasgrf1 - ras protein-specific guanine nucleotide-releasing factor 1, Ank3 - ankyrin 3, epithelial, Nlgn2 - neuroligin 2, Hcn1 - hyperpolarization-activated, cyclic nucleotide-gated k+ 1, Dmd - dystrophin, muscular dystrophy, Mapk8ip2 - mitogen-activated protein kinase 8 interacting protein 2, Dlg4 - discs, large homolog 4 (droso…
GO:0007399	nervous system development	2.78e-09	3.56e-07	2.68	11164	299	600	43	[Igsf9b - immunoglobulin superfamily, member 9b, Sema6d - sema domain, transmembrane domain (tm), and cytoplasmic domain, (semaphorin) 6d, Glrb - glycine receptor, beta subunit, Pcsk2 - proprotein convertase subtilisin/kexin type 2, Ntrk3 - neurotrophic tyrosine kinase, receptor, type 3, Vps13a - vacuolar protein sorting 13a (yeast), Camk2b - calcium/calmodulin-dependent protein kinase ii, beta, …
GO:0035249	synaptic transmission, glutamatergic	4.21e-09	5.34e-07	6.86	11164	38	600	14	[Gria3 - glutamate receptor, ionotropic, ampa3 (alpha 3), Clstn3 - calsyntenin 3, Slc17a6 - solute carrier family 17 (sodium-dependent inorganic phosphate cotransporter), member 6, Unc13a - unc-13 homolog a (c. elegans), Cacna1a - calcium channel, voltage-dependent, p/q type, alpha 1a subunit, Adrb2 - adrenergic receptor, beta 2, Gria2 - glutamate receptor, ionotropic, ampa2 (alpha 2), Gria1 - gl…
GO:0051705	multi-organism behavior	6.74e-09	8.48e-07	5.73	11164	52	600	16	[Shank2 - sh3/ankyrin domain gene 2, Sept5 - septin 5, Brinp1 - bone morphogenic protein/retinoic acid inducible neural specific 1, Chrnb2 - cholinergic receptor, nicotinic, beta polypeptide 2 (neuronal), Nlgn2 - neuroligin 2, Gad1 - glutamate decarboxylase 1, Vps13a - vacuolar protein sorting 13a (yeast), Mapk8ip2 - mitogen-activated protein kinase 8 interacting protein 2, Dlg4 - discs, large ho…
GO:0032940	secretion by cell	7.28e-09	9.08e-07	2.71	11164	275	600	40	[Syt7 - synaptotagmin vii, Cadps - ca2+-dependent secretion activator, Myo6 - myosin vi, Unc13a - unc-13 homolog a (c. elegans), Stxbp5l - syntaxin binding protein 5-like, Eng - endoglin, Syn3 - synapsin iii, Myh10 - myosin, heavy polypeptide 10, non-muscle, Trim9 - tripartite motif-containing 9, Nrxn1 - neurexin i, Pcsk6 - proprotein convertase subtilisin/kexin type 6, Stxbp1 - syntaxin binding …
GO:0010976	positive regulation of neuron projection development	7.88e-09	9.73e-07	2.62	11164	298	600	42	[Grlf1 - glucocorticoid receptor dna binding factor 1, Shank2 - sh3/ankyrin domain gene 2, Gdi1 - guanosine diphosphate (gdp) dissociation inhibitor 1, Cpne5 - copine v, Fez1 - fasciculation and elongation protein zeta 1 (zygin i), Nlgn2 - neuroligin 2, Plxnb1 - plexin b1, Unc13a - unc-13 homolog a (c. elegans), Ntrk3 - neurotrophic tyrosine kinase, receptor, type 3, Dmd - dystrophin, muscular dy…
GO:0006816	calcium ion transport	8.46e-09	1.04e-06	3.33	11164	162	600	29	[Atp2b2 - atpase, ca++ transporting, plasma membrane 2, Camk2a - calcium/calmodulin-dependent protein kinase ii alpha, Slc25a23 - solute carrier family 25 (mitochondrial carrier; phosphate carrier), member 23, Slc8a2 - solute carrier family 8 (sodium/calcium exchanger), member 2, P2ry12 - purinergic receptor p2y, g-protein coupled 12, Atp2b4 - atpase, ca++ transporting, plasma membrane 4, Camk2b …
GO:0051128	regulation of cellular component organization	8.86e-09	1.08e-06	1.52	11164	1951	600	159	[Myh14 - myosin, heavy polypeptide 14, Aatk - apoptosis-associated tyrosine kinase, Gdi1 - guanosine diphosphate (gdp) dissociation inhibitor 1, Syt7 - synaptotagmin vii, Nlgn2 - neuroligin 2, Ntrk3 - neurotrophic tyrosine kinase, receptor, type 3, P2ry12 - purinergic receptor p2y, g-protein coupled 12, Camk2b - calcium/calmodulin-dependent protein kinase ii, beta, Pfn2 - profilin 2, Gda - guanin…
GO:0048168	regulation of neuronal synaptic plasticity	9.23e-09	1.11e-06	5.27	11164	60	600	17	[Syp - synaptophysin, Camk2a - calcium/calmodulin-dependent protein kinase ii alpha, Slc8a2 - solute carrier family 8 (sodium/calcium exchanger), member 2, Syt4 - synaptotagmin iv, Rasgrf1 - ras protein-specific guanine nucleotide-releasing factor 1, Unc13a - unc-13 homolog a (c. elegans), Camk2b - calcium/calmodulin-dependent protein kinase ii, beta, Slc4a10 - solute carrier family 4, sodium bic…
GO:1904862	inhibitory synapse assembly	9.56e-09	1.14e-06	16.28	11164	8	600	7	[Gabrb3 - gamma-aminobutyric acid (gaba) a receptor, subunit beta 3, Npas4 - neuronal pas domain protein 4, Gabrb2 - gamma-aminobutyric acid (gaba) a receptor, subunit beta 2, Nlgn2 - neuroligin 2, Gabra2 - gamma-aminobutyric acid (gaba) a receptor, subunit alpha 2, Plxnb1 - plexin b1, Gabrg2 - gamma-aminobutyric acid (gaba) a receptor, subunit gamma 2]
GO:0031346	positive regulation of cell projection organization	1.34e-08	1.58e-06	2.39	11164	373	600	48	[Grlf1 - glucocorticoid receptor dna binding factor 1, Shank2 - sh3/ankyrin domain gene 2, Gdi1 - guanosine diphosphate (gdp) dissociation inhibitor 1, Cpne5 - copine v, Fez1 - fasciculation and elongation protein zeta 1 (zygin i), Nlgn2 - neuroligin 2, Unc13a - unc-13 homolog a (c. elegans), Ntrk3 - neurotrophic tyrosine kinase, receptor, type 3, Plxnb1 - plexin b1, Dmd - dystrophin, muscular dy…
GO:0051963	regulation of synapse assembly	1.48e-08	1.74e-06	4.2	11164	93	600	21	[Clstn3 - calsyntenin 3, Lphn1 - latrophilin 1, Ptprd - protein tyrosine phosphatase, receptor type, d, Lrrc4b - leucine rich repeat containing 4b, Chrnb2 - cholinergic receptor, nicotinic, beta polypeptide 2 (neuronal), Slitrk5 - slit and ntrk-like family, member 5, Ephb1 - eph receptor b1, Mdga2 - mam domain containing glycosylphosphatidylinositol anchor 2, Nlgn2 - neuroligin 2, Ntrk3 - neurotr…
GO:0045666	positive regulation of neuron differentiation	1.54e-08	1.79e-06	2.44	11164	351	600	46	[Grlf1 - glucocorticoid receptor dna binding factor 1, Shank2 - sh3/ankyrin domain gene 2, Brinp1 - bone morphogenic protein/retinoic acid inducible neural specific 1, Gdi1 - guanosine diphosphate (gdp) dissociation inhibitor 1, Cpne5 - copine v, Fez1 - fasciculation and elongation protein zeta 1 (zygin i), Nlgn2 - neuroligin 2, Plxnb1 - plexin b1, Unc13a - unc-13 homolog a (c. elegans), Ntrk3 - …
GO:0007409	axonogenesis	2.11e-08	2.44e-06	3.69	11164	121	600	24	[Grlf1 - glucocorticoid receptor dna binding factor 1, Map1b - microtubule-associated protein 1b, Cdh11 - cadherin 11, Atl1 - atlastin gtpase 1, Chrnb2 - cholinergic receptor, nicotinic, beta polypeptide 2 (neuronal), Brsk2 - br serine/threonine kinase 2, Map1a - microtubule-associated protein 1 a, Dclk1 - doublecortin-like kinase 1, Slitrk5 - slit and ntrk-like family, member 5, Ank3 - ankyrin 3…
GO:0035640	exploration behavior	2.21e-08	2.53e-06	8.19	11164	25	600	11	[Shank2 - sh3/ankyrin domain gene 2, Dlg4 - discs, large homolog 4 (drosophila), Slc4a10 - solute carrier family 4, sodium bicarbonate cotransporter-like, member 10, Brinp1 - bone morphogenic protein/retinoic acid inducible neural specific 1, Prkce - protein kinase c, epsilon, Kmt2a - lysine (k)-specific methyltransferase 2a, Ptpn5 - protein tyrosine phosphatase, non-receptor type 5, Nlgn2 - neur…
GO:0071625	vocalization behavior	2.72e-08	3.08e-06	12.4	11164	12	600	8	[Shank2 - sh3/ankyrin domain gene 2, Myh14 - myosin, heavy polypeptide 14, Brinp1 - bone morphogenic protein/retinoic acid inducible neural specific 1, Dlg4 - discs, large homolog 4 (drosophila), Nrxn1 - neurexin i, Auts2 - autism susceptibility candidate 2, Nrxn2 - neurexin ii, Shank1 - sh3/ankyrin domain gene 1]
GO:0010959	regulation of metal ion transport	3.12e-08	3.51e-06	2.61	11164	278	600	39	[Atp2b2 - atpase, ca++ transporting, plasma membrane 2, Camk2a - calcium/calmodulin-dependent protein kinase ii alpha, Ehd3 - eh-domain containing 3, Ank3 - ankyrin 3, epithelial, P2ry12 - purinergic receptor p2y, g-protein coupled 12, Dmd - dystrophin, muscular dystrophy, Atp2b4 - atpase, ca++ transporting, plasma membrane 4, Nedd4 - neural precursor cell expressed, developmentally down-regulate…
GO:0007010	cytoskeleton organization	4.35e-08	4.85e-06	1.99	11164	616	600	66	[Grlf1 - glucocorticoid receptor dna binding factor 1, Arrb1 - arrestin, beta 1, Myh14 - myosin, heavy polypeptide 14, Cdc42bpb - cdc42 binding protein kinase beta, D10Bwg1379e - dna segment, chr 10, brigham & women's genetics 1379 expressed, Nefh - neurofilament, heavy polypeptide, Rhobtb1 - rho-related btb domain containing 1, Myh10 - myosin, heavy polypeptide 10, non-muscle, Pfn2 - profilin 2,…
GO:0048489	synaptic vesicle transport	5.02e-08	5.56e-06	5.05	11164	59	600	16	[Madd - map-kinase activating death domain, Syt4 - synaptotagmin iv, Syt7 - synaptotagmin vii, Cadps - ca2+-dependent secretion activator, Unc13a - unc-13 homolog a (c. elegans), Cacna1a - calcium channel, voltage-dependent, p/q type, alpha 1a subunit, Ap3b2 - adaptor-related protein complex 3, beta 2 subunit, Rims2 - regulating synaptic membrane exocytosis 2, Trim9 - tripartite motif-containing …
GO:0097480	establishment of synaptic vesicle localization	5.02e-08	5.52e-06	5.05	11164	59	600	16	[Madd - map-kinase activating death domain, Syt4 - synaptotagmin iv, Syt7 - synaptotagmin vii, Cadps - ca2+-dependent secretion activator, Unc13a - unc-13 homolog a (c. elegans), Cacna1a - calcium channel, voltage-dependent, p/q type, alpha 1a subunit, Ap3b2 - adaptor-related protein complex 3, beta 2 subunit, Rims2 - regulating synaptic membrane exocytosis 2, Trim9 - tripartite motif-containing …
GO:0043270	positive regulation of ion transport	5.24e-08	5.71e-06	2.83	11164	217	600	33	[Atp2b2 - atpase, ca++ transporting, plasma membrane 2, Camk2a - calcium/calmodulin-dependent protein kinase ii alpha, Ehd3 - eh-domain containing 3, Ank3 - ankyrin 3, epithelial, Hcn1 - hyperpolarization-activated, cyclic nucleotide-gated k+ 1, Fam115a - family with sequence similarity 115, member a, P2ry12 - purinergic receptor p2y, g-protein coupled 12, Dmd - dystrophin, muscular dystrophy, Ab…
GO:0031175	neuron projection development	5.44e-08	5.89e-06	2.68	11164	250	600	36	[Grlf1 - glucocorticoid receptor dna binding factor 1, Atp2b2 - atpase, ca++ transporting, plasma membrane 2, Shank2 - sh3/ankyrin domain gene 2, Fry - furry homolog (drosophila), Rasgrf1 - ras protein-specific guanine nucleotide-releasing factor 1, Nefh - neurofilament, heavy polypeptide, Myo6 - myosin vi, Atcay - ataxia, cerebellar, cayman type homolog (human), Clmn - calmin, Myh10 - myosin, he…
GO:0051650	establishment of vesicle localization	5.74e-08	6.16e-06	3.91	11164	100	600	21	[Madd - map-kinase activating death domain, Syt4 - synaptotagmin iv, Syt7 - synaptotagmin vii, Cadps - ca2+-dependent secretion activator, Unc13a - unc-13 homolog a (c. elegans), Ap3b2 - adaptor-related protein complex 3, beta 2 subunit, Cacna1a - calcium channel, voltage-dependent, p/q type, alpha 1a subunit, Kif1a - kinesin family member 1a, Rims2 - regulating synaptic membrane exocytosis 2, Ki…
GO:0048172	regulation of short-term neuronal synaptic plasticity	5.81e-08	6.2e-06	9.85	11164	17	600	9	[Syp - synaptophysin, Slc4a10 - solute carrier family 4, sodium bicarbonate cotransporter-like, member 10, Slc8a2 - solute carrier family 8 (sodium/calcium exchanger), member 2, Syt4 - synaptotagmin iv, Kmt2a - lysine (k)-specific methyltransferase 2a, Syn1 - synapsin i, Unc13a - unc-13 homolog a (c. elegans), Rab3a - rab3a, member ras oncogene family, Ppfia3 - protein tyrosine phosphatase, recep…
GO:0070588	calcium ion transmembrane transport	8.32e-08	8.8e-06	3.69	11164	111	600	22	[Atp2b2 - atpase, ca++ transporting, plasma membrane 2, Slc25a23 - solute carrier family 25 (mitochondrial carrier; phosphate carrier), member 23, Slc8a2 - solute carrier family 8 (sodium/calcium exchanger), member 2, Ryr2 - ryanodine receptor 2, cardiac, Ryr3 - ryanodine receptor 3, Cacna1e - calcium channel, voltage-dependent, r type, alpha 1e subunit, P2ry12 - purinergic receptor p2y, g-protei…
GO:0051239	regulation of multicellular organismal process	8.37e-08	8.78e-06	1.46	11164	2063	600	162	[Camk2a - calcium/calmodulin-dependent protein kinase ii alpha, Aatk - apoptosis-associated tyrosine kinase, Dlgap2 - discs, large (drosophila) homolog-associated protein 2, Gdi1 - guanosine diphosphate (gdp) dissociation inhibitor 1, Syt7 - synaptotagmin vii, Nlgn2 - neuroligin 2, Ntrk3 - neurotrophic tyrosine kinase, receptor, type 3, P2ry12 - purinergic receptor p2y, g-protein coupled 12, Atp2…
GO:0050954	sensory perception of mechanical stimulus	8.59e-08	8.95e-06	4.16	11164	85	600	19	[Atp2b2 - atpase, ca++ transporting, plasma membrane 2, Myh14 - myosin, heavy polypeptide 14, Grm7 - glutamate receptor, metabotropic 7, Jag2 - jagged 2, Map1a - microtubule-associated protein 1 a, Chrnb2 - cholinergic receptor, nicotinic, beta polypeptide 2 (neuronal), Myo6 - myosin vi, Gabrb3 - gamma-aminobutyric acid (gaba) a receptor, subunit beta 3, Grap - grb2-related adaptor protein, Scn8a…
GO:0044057	regulation of system process	1.09e-07	1.13e-05	2.31	11164	362	600	45	[Igsf9b - immunoglobulin superfamily, member 9b, Shank2 - sh3/ankyrin domain gene 2, Glra1 - glycine receptor, alpha 1 subunit, Dlgap2 - discs, large (drosophila) homolog-associated protein 2, Ehd3 - eh-domain containing 3, Syne1 - spectrin repeat containing, nuclear envelope 1, Nlgn2 - neuroligin 2, Dmd - dystrophin, muscular dystrophy, Atp2b4 - atpase, ca++ transporting, plasma membrane 4, Abat…
GO:0008090	retrograde axonal transport	1.11e-07	1.14e-05	9.3	11164	18	600	9	[Hap1 - huntingtin-associated protein 1, Kif1b - kinesin family member 1b, Map1a - microtubule-associated protein 1 a, Agtpbp1 - atp/gtp binding protein 1, Kif5a - kinesin family member 5a, Nefl - neurofilament, light polypeptide, Bsn - bassoon, Dlg2 - discs, large homolog 2 (drosophila), Kif1a - kinesin family member 1a]
GO:0006928	movement of cell or subcellular component	1.19e-07	1.21e-05	1.81	11164	811	600	79	[Grlf1 - glucocorticoid receptor dna binding factor 1, Celsr2 - cadherin, egf lag seven-pass g-type receptor 2 (flamingo homolog, drosophila), Myh14 - myosin, heavy polypeptide 14, Unc5c - unc-5 homolog c (c. elegans), Cdc42bpb - cdc42 binding protein kinase beta, Agtpbp1 - atp/gtp binding protein 1, Ntrk3 - neurotrophic tyrosine kinase, receptor, type 3, P2ry12 - purinergic receptor p2y, g-prote…
GO:0050885	neuromuscular process controlling balance	1.27e-07	1.29e-05	5.43	11164	48	600	14	[Atp2b2 - atpase, ca++ transporting, plasma membrane 2, Jph4 - junctophilin 4, Nlgn2 - neuroligin 2, Cacna1a - calcium channel, voltage-dependent, p/q type, alpha 1a subunit, Camk2b - calcium/calmodulin-dependent protein kinase ii, beta, Myh10 - myosin, heavy polypeptide 10, non-muscle, Bcr - breakpoint cluster region, Camta1 - calmodulin binding transcription activator 1, Dlg4 - discs, large hom…
GO:0060079	excitatory postsynaptic potential	1.41e-07	1.41e-05	7.06	11164	29	600	11	[Sez6 - seizure related gene 6, Slc17a7 - solute carrier family 17 (sodium-dependent inorganic phosphate cotransporter), member 7, Npas4 - neuronal pas domain protein 4, Grin1 - glutamate receptor, ionotropic, nmda1 (zeta 1), Dgki - diacylglycerol kinase, iota, Grin2a - glutamate receptor, ionotropic, nmda2a (epsilon 1), Grin2b - glutamate receptor, ionotropic, nmda2b (epsilon 2), Lrrk2 - leucine…
GO:0045055	regulated exocytosis	1.42e-07	1.41e-05	4.46	11164	71	600	17	[Syt4 - synaptotagmin iv, Syt7 - synaptotagmin vii, Cadps - ca2+-dependent secretion activator, Unc13a - unc-13 homolog a (c. elegans), Cacna1a - calcium channel, voltage-dependent, p/q type, alpha 1a subunit, Cacna1c - calcium channel, voltage-dependent, l type, alpha 1c subunit, Rims2 - regulating synaptic membrane exocytosis 2, Trim9 - tripartite motif-containing 9, Sptbn2 - spectrin beta, non…
GO:2000026	regulation of multicellular organismal development	1.48e-07	1.46e-05	1.57	11164	1419	600	120	[Camk2a - calcium/calmodulin-dependent protein kinase ii alpha, Aatk - apoptosis-associated tyrosine kinase, Gdi1 - guanosine diphosphate (gdp) dissociation inhibitor 1, Nlgn2 - neuroligin 2, Ntrk3 - neurotrophic tyrosine kinase, receptor, type 3, P2ry12 - purinergic receptor p2y, g-protein coupled 12, Camk2b - calcium/calmodulin-dependent protein kinase ii, beta, Stab1 - stabilin 1, Mapk8ip3 - m…
GO:0006813	potassium ion transport	1.55e-07	1.52e-05	4.02	11164	88	600	19	[Kcnq2 - potassium voltage-gated channel, subfamily q, member 2, Kcnc3 - potassium voltage gated channel, shaw-related subfamily, member 3, Kcnc1 - potassium voltage gated channel, shaw-related subfamily, member 1, Kcnd2 - potassium voltage-gated channel, shal-related family, member 2, Kcnt1 - potassium channel, subfamily t, member 1, Kcnf1 - potassium voltage-gated channel, subfamily f, member 1…
GO:0016043	cellular component organization	1.8e-07	1.75e-05	1.32	11164	3343	600	237	[Myh14 - myosin, heavy polypeptide 14, Camk2a - calcium/calmodulin-dependent protein kinase ii alpha, Cgnl1 - cingulin-like 1, Syt7 - synaptotagmin vii, Adcy1 - adenylate cyclase 1, Slc12a5 - solute carrier family 12, member 5, Camk2b - calcium/calmodulin-dependent protein kinase ii, beta, Nrxn1 - neurexin i, Stxbp1 - syntaxin binding protein 1, Lrrc7 - leucine rich repeat containing 7, Nrxn3 - n…
GO:0045595	regulation of cell differentiation	1.87e-07	1.81e-05	1.61	11164	1273	600	110	[Camk2a - calcium/calmodulin-dependent protein kinase ii alpha, Aatk - apoptosis-associated tyrosine kinase, Gdi1 - guanosine diphosphate (gdp) dissociation inhibitor 1, Nlgn2 - neuroligin 2, Ntrk3 - neurotrophic tyrosine kinase, receptor, type 3, P2ry12 - purinergic receptor p2y, g-protein coupled 12, Camk2b - calcium/calmodulin-dependent protein kinase ii, beta, Prkca - protein kinase c, alpha,…
GO:0016079	synaptic vesicle exocytosis	2.11e-07	2.03e-05	6.82	11164	30	600	11	[Rims2 - regulating synaptic membrane exocytosis 2, Trim9 - tripartite motif-containing 9, Sptbn2 - spectrin beta, non-erythrocytic 2, Cadps - ca2+-dependent secretion activator, Syt7 - synaptotagmin vii, Unc13c - unc-13 homolog c (c. elegans), Cadps2 - ca2+-dependent activator protein for secretion 2, Unc13a - unc-13 homolog a (c. elegans), Rab3a - rab3a, member ras oncogene family, Cacna1a - ca…
GO:0007605	sensory perception of sound	2.52e-07	2.41e-05	4.08	11164	82	600	18	[Atp2b2 - atpase, ca++ transporting, plasma membrane 2, Myh14 - myosin, heavy polypeptide 14, Grm7 - glutamate receptor, metabotropic 7, Jag2 - jagged 2, Chrnb2 - cholinergic receptor, nicotinic, beta polypeptide 2 (neuronal), Map1a - microtubule-associated protein 1 a, Myo6 - myosin vi, Gabrb3 - gamma-aminobutyric acid (gaba) a receptor, subunit beta 3, Grap - grb2-related adaptor protein, Scn8a…
GO:0050769	positive regulation of neurogenesis	2.72e-07	2.59e-05	2.13	11164	436	600	50	[Grlf1 - glucocorticoid receptor dna binding factor 1, Shank2 - sh3/ankyrin domain gene 2, Gdi1 - guanosine diphosphate (gdp) dissociation inhibitor 1, Fez1 - fasciculation and elongation protein zeta 1 (zygin i), Nlgn2 - neuroligin 2, Ntrk3 - neurotrophic tyrosine kinase, receptor, type 3, P2ry12 - purinergic receptor p2y, g-protein coupled 12, Camk2b - calcium/calmodulin-dependent protein kinas…
GO:0048731	system development	3.06e-07	2.88e-05	2.05	11164	489	600	54	[Igsf9b - immunoglobulin superfamily, member 9b, Celsr2 - cadherin, egf lag seven-pass g-type receptor 2 (flamingo homolog, drosophila), Jag2 - jagged 2, Ntrk3 - neurotrophic tyrosine kinase, receptor, type 3, P2ry12 - purinergic receptor p2y, g-protein coupled 12, Vps13a - vacuolar protein sorting 13a (yeast), Camk2b - calcium/calmodulin-dependent protein kinase ii, beta, Camk2g - calcium/calmod…
GO:0050770	regulation of axonogenesis	3.36e-07	3.15e-05	2.89	11164	180	600	28	[Grlf1 - glucocorticoid receptor dna binding factor 1, Sema6d - sema domain, transmembrane domain (tm), and cytoplasmic domain, (semaphorin) 6d, Aatk - apoptosis-associated tyrosine kinase, Gdi1 - guanosine diphosphate (gdp) dissociation inhibitor 1, Arhgap4 - rho gtpase activating protein 4, Ntrk3 - neurotrophic tyrosine kinase, receptor, type 3, Plxnb1 - plexin b1, Ptprs - protein tyrosine phos…
GO:0006887	exocytosis	3.7e-07	3.45e-05	3.29	11164	130	600	23	[Syt4 - synaptotagmin iv, Brsk2 - br serine/threonine kinase 2, Srcin1 - src kinase signaling inhibitor 1, Cadps - ca2+-dependent secretion activator, Syt7 - synaptotagmin vii, Unc13a - unc-13 homolog a (c. elegans), Cacna1a - calcium channel, voltage-dependent, p/q type, alpha 1a subunit, Stxbp5l - syntaxin binding protein 5-like, Cacna1c - calcium channel, voltage-dependent, l type, alpha 1c su…
GO:0030036	actin cytoskeleton organization	4.05e-07	3.74e-05	2.51	11164	259	600	35	[Grlf1 - glucocorticoid receptor dna binding factor 1, Arrb1 - arrestin, beta 1, Myh14 - myosin, heavy polypeptide 14, Cdc42bpb - cdc42 binding protein kinase beta, Arhgef17 - rho guanine nucleotide exchange factor (gef) 17, Agap2 - arfgap with gtpase domain, ankyrin repeat and ph domain 2, D10Bwg1379e - dna segment, chr 10, brigham & women's genetics 1379 expressed, Rhobtb1 - rho-related btb dom…
GO:0060998	regulation of dendritic spine development	4.46e-07	4.1e-05	3.94	11164	85	600	18	[Shank2 - sh3/ankyrin domain gene 2, Itpka - inositol 1,4,5-trisphosphate 3-kinase a, Dnm3 - dynamin 3, Srcin1 - src kinase signaling inhibitor 1, Dbn1 - drebrin 1, Nlgn2 - neuroligin 2, Ngef - neuronal guanine nucleotide exchange factor, Sipa1l1 - signal-induced proliferation-associated 1 like 1, Camk2b - calcium/calmodulin-dependent protein kinase ii, beta, Eef2k - eukaryotic elongation factor-…
GO:0010720	positive regulation of cell development	5.16e-07	4.71e-05	2.04	11164	484	600	53	[Grlf1 - glucocorticoid receptor dna binding factor 1, Shank2 - sh3/ankyrin domain gene 2, Gdi1 - guanosine diphosphate (gdp) dissociation inhibitor 1, Fez1 - fasciculation and elongation protein zeta 1 (zygin i), Nlgn2 - neuroligin 2, Ntrk3 - neurotrophic tyrosine kinase, receptor, type 3, P2ry12 - purinergic receptor p2y, g-protein coupled 12, Camk2b - calcium/calmodulin-dependent protein kinas…
GO:0098609	cell-cell adhesion	6.16e-07	5.59e-05	2.51	11164	252	600	34	[Igsf9b - immunoglobulin superfamily, member 9b, Celsr2 - cadherin, egf lag seven-pass g-type receptor 2 (flamingo homolog, drosophila), Lphn1 - latrophilin 1, Cadm3 - cell adhesion molecule 3, Nlgn2 - neuroligin 2, Lmo7 - lim domain only 7, Dlg2 - discs, large homolog 2 (drosophila), P2ry12 - purinergic receptor p2y, g-protein coupled 12, Cyfip2 - cytoplasmic fmr1 interacting protein 2, Dlg4 - d…
GO:0032386	regulation of intracellular transport	6.57e-07	5.92e-05	2.25	11164	348	600	42	[Camk2a - calcium/calmodulin-dependent protein kinase ii alpha, Gdi1 - guanosine diphosphate (gdp) dissociation inhibitor 1, Fez1 - fasciculation and elongation protein zeta 1 (zygin i), Syt7 - synaptotagmin vii, Sec16b - sec16 homolog b (s. cerevisiae), Ank3 - ankyrin 3, epithelial, Nefh - neurofilament, heavy polypeptide, Myo6 - myosin vi, Adcy1 - adenylate cyclase 1, Unc13a - unc-13 homolog a …
GO:0008306	associative learning	7.32e-07	6.55e-05	4	11164	79	600	17	[Apbb1 - amyloid beta (a4) precursor protein-binding, family b, member 1, Grm7 - glutamate receptor, metabotropic 7, Map1a - microtubule-associated protein 1 a, Chrnb2 - cholinergic receptor, nicotinic, beta polypeptide 2 (neuronal), Cacna1e - calcium channel, voltage-dependent, r type, alpha 1e subunit, Adrb2 - adrenergic receptor, beta 2, Cacna1c - calcium channel, voltage-dependent, l type, al…
GO:0009653	anatomical structure morphogenesis	7.56e-07	6.72e-05	1.7	11164	906	600	83	[Grlf1 - glucocorticoid receptor dna binding factor 1, Celsr2 - cadherin, egf lag seven-pass g-type receptor 2 (flamingo homolog, drosophila), Shank2 - sh3/ankyrin domain gene 2, Camk2a - calcium/calmodulin-dependent protein kinase ii alpha, Myh14 - myosin, heavy polypeptide 14, Atl1 - atlastin gtpase 1, Jag2 - jagged 2, Fez1 - fasciculation and elongation protein zeta 1 (zygin i), Nefh - neurofi…
GO:0032502	developmental process	7.64e-07	6.75e-05	1.33	11164	2917	600	209	[Fasn - fatty acid synthase, Camk2a - calcium/calmodulin-dependent protein kinase ii alpha, Myh14 - myosin, heavy polypeptide 14, Aatk - apoptosis-associated tyrosine kinase, Adcy1 - adenylate cyclase 1, Ntrk3 - neurotrophic tyrosine kinase, receptor, type 3, Slc12a5 - solute carrier family 12, member 5, Camk2b - calcium/calmodulin-dependent protein kinase ii, beta, Camk2g - calcium/calmodulin-de…
GO:0019932	second-messenger-mediated signaling	9.53e-07	8.37e-05	3.04	11164	147	600	24	[Gucy1b3 - guanylate cyclase 1, soluble, beta 3, Ksr2 - kinase suppressor of ras 2, Lphn1 - latrophilin 1, Epha5 - eph receptor a5, Ryr2 - ryanodine receptor 2, cardiac, Adcy8 - adenylate cyclase 8, Pclo - piccolo (presynaptic cytomatrix protein), Adcy1 - adenylate cyclase 1, P2ry12 - purinergic receptor p2y, g-protein coupled 12, Dmd - dystrophin, muscular dystrophy, Adrb2 - adrenergic receptor,…
GO:0099173	postsynapse organization	9.77e-07	8.52e-05	5.45	11164	41	600	12	[Rph3a - rabphilin 3a, Shank2 - sh3/ankyrin domain gene 2, Itpka - inositol 1,4,5-trisphosphate 3-kinase a, Dlg4 - discs, large homolog 4 (drosophila), Sptbn2 - spectrin beta, non-erythrocytic 2, Ctnnd2 - catenin (cadherin associated protein), delta 2, Epha5 - eph receptor a5, Ephb1 - eph receptor b1, Grin2a - glutamate receptor, ionotropic, nmda2a (epsilon 1), Cnksr2 - connector enhancer of kina…
GO:0098815	modulation of excitatory postsynaptic potential	9.77e-07	8.47e-05	5.45	11164	41	600	12	[Rims2 - regulating synaptic membrane exocytosis 2, Shank2 - sh3/ankyrin domain gene 2, Dlg4 - discs, large homolog 4 (drosophila), Nrxn1 - neurexin i, Grin1 - glutamate receptor, ionotropic, nmda1 (zeta 1), Syne1 - spectrin repeat containing, nuclear envelope 1, Dbn1 - drebrin 1, Nlgn2 - neuroligin 2, Grin2a - glutamate receptor, ionotropic, nmda2a (epsilon 1), Lrrk2 - leucine-rich repeat kinase…
GO:0008089	anterograde axonal transport	9.77e-07	8.42e-05	5.45	11164	41	600	12	[Hap1 - huntingtin-associated protein 1, Kif1b - kinesin family member 1b, Madd - map-kinase activating death domain, Mapk8ip3 - mitogen-activated protein kinase 8 interacting protein 3, Map1a - microtubule-associated protein 1 a, Agtpbp1 - atp/gtp binding protein 1, Kif5a - kinesin family member 5a, Nefl - neurofilament, light polypeptide, Kif5c - kinesin family member 5c, Dlg2 - discs, large ho…
GO:0051640	organelle localization	9.89e-07	8.47e-05	2.24	11164	341	600	41	[Syne1 - spectrin repeat containing, nuclear envelope 1, Agtpbp1 - atp/gtp binding protein 1, Fez1 - fasciculation and elongation protein zeta 1 (zygin i), Syt7 - synaptotagmin vii, Cadps - ca2+-dependent secretion activator, Unc13a - unc-13 homolog a (c. elegans), Dmd - dystrophin, muscular dystrophy, Syn3 - synapsin iii, Kif1a - kinesin family member 1a, Atcay - ataxia, cerebellar, cayman type …
GO:0071840	cellular component organization or biogenesis	1.01e-06	8.62e-05	1.29	11164	3410	600	237	[Myh14 - myosin, heavy polypeptide 14, Camk2a - calcium/calmodulin-dependent protein kinase ii alpha, Cgnl1 - cingulin-like 1, Syt7 - synaptotagmin vii, Adcy1 - adenylate cyclase 1, Slc12a5 - solute carrier family 12, member 5, Camk2b - calcium/calmodulin-dependent protein kinase ii, beta, Nrxn1 - neurexin i, Stxbp1 - syntaxin binding protein 1, Lrrc7 - leucine rich repeat containing 7, Nrxn3 - n…
GO:0007186	G protein-coupled receptor signaling pathway	1.03e-06	8.73e-05	2.32	11164	305	600	38	[Arrb1 - arrestin, beta 1, Celsr2 - cadherin, egf lag seven-pass g-type receptor 2 (flamingo homolog, drosophila), Glra1 - glycine receptor, alpha 1 subunit, Camk2a - calcium/calmodulin-dependent protein kinase ii alpha, Lphn1 - latrophilin 1, Glrb - glycine receptor, beta subunit, Adcy8 - adenylate cyclase 8, Adcy1 - adenylate cyclase 1, P2ry12 - purinergic receptor p2y, g-protein coupled 12, Ga…
GO:0048869	cellular developmental process	1.03e-06	8.69e-05	1.46	11164	1755	600	138	[Celsr2 - cadherin, egf lag seven-pass g-type receptor 2 (flamingo homolog, drosophila), Fasn - fatty acid synthase, Myh14 - myosin, heavy polypeptide 14, Camk2a - calcium/calmodulin-dependent protein kinase ii alpha, Ntrk3 - neurotrophic tyrosine kinase, receptor, type 3, Adcy1 - adenylate cyclase 1, Lbr - lamin b receptor, Camk2b - calcium/calmodulin-dependent protein kinase ii, beta, Camk2g - …
GO:0099150	regulation of postsynaptic specialization assembly	1.05e-06	8.77e-05	8.76	11164	17	600	8	[Ptprd - protein tyrosine phosphatase, receptor type, d, Ptprs - protein tyrosine phosphatase, receptor type, s, Nrxn1 - neurexin i, Arhgef9 - cdc42 guanine nucleotide exchange factor (gef) 9, Lrrc4b - leucine rich repeat containing 4b, Ntrk3 - neurotrophic tyrosine kinase, receptor, type 3, Sipa1l1 - signal-induced proliferation-associated 1 like 1, Numb - numb gene homolog (drosophila)]
GO:0150052	regulation of postsynapse assembly	1.05e-06	8.72e-05	8.76	11164	17	600	8	[Ptprd - protein tyrosine phosphatase, receptor type, d, Ptprs - protein tyrosine phosphatase, receptor type, s, Nrxn1 - neurexin i, Arhgef9 - cdc42 guanine nucleotide exchange factor (gef) 9, Lrrc4b - leucine rich repeat containing 4b, Ntrk3 - neurotrophic tyrosine kinase, receptor, type 3, Sipa1l1 - signal-induced proliferation-associated 1 like 1, Numb - numb gene homolog (drosophila)]
GO:0034767	positive regulation of ion transmembrane transport	1.08e-06	8.89e-05	3.31	11164	118	600	21	[Acsl6 - acyl-coa synthetase long-chain family member 6, Kcnc1 - potassium voltage gated channel, shaw-related subfamily, member 1, Ryr2 - ryanodine receptor 2, cardiac, Wnk2 - wnk lysine deficient protein kinase 2, Ehd3 - eh-domain containing 3, Ank3 - ankyrin 3, epithelial, Rgs7 - regulator of g protein signaling 7, Hcn1 - hyperpolarization-activated, cyclic nucleotide-gated k+ 1, Thy1 - thymus…
GO:0030029	actin filament-based process	1.11e-06	9.16e-05	2.38	11164	282	600	36	[Grlf1 - glucocorticoid receptor dna binding factor 1, Arrb1 - arrestin, beta 1, Myh14 - myosin, heavy polypeptide 14, Cdc42bpb - cdc42 binding protein kinase beta, Arhgef17 - rho guanine nucleotide exchange factor (gef) 17, Agap2 - arfgap with gtpase domain, ankyrin repeat and ph domain 2, D10Bwg1379e - dna segment, chr 10, brigham & women's genetics 1379 expressed, Rhobtb1 - rho-related btb dom…
GO:0046578	regulation of Ras protein signal transduction	1.14e-06	9.29e-05	2.79	11164	180	600	27	[Grlf1 - glucocorticoid receptor dna binding factor 1, Arrb1 - arrestin, beta 1, Arhgef17 - rho guanine nucleotide exchange factor (gef) 17, Rasgrf1 - ras protein-specific guanine nucleotide-releasing factor 1, D10Bwg1379e - dna segment, chr 10, brigham & women's genetics 1379 expressed, Trio - triple functional domain (ptprf interacting), Iqsec3 - iq motif and sec7 domain 3, Prex2 - phosphatidyl…
GO:0098742	cell-cell adhesion via plasma-membrane adhesion molecules	1.24e-06	0.000101	3.28	11164	119	600	21	[Celsr2 - cadherin, egf lag seven-pass g-type receptor 2 (flamingo homolog, drosophila), Igsf9b - immunoglobulin superfamily, member 9b, Cdh11 - cadherin 11, Lphn1 - latrophilin 1, Clstn3 - calsyntenin 3, Ptprd - protein tyrosine phosphatase, receptor type, d, Lrrc4b - leucine rich repeat containing 4b, Cadm3 - cell adhesion molecule 3, Ntng1 - netrin g1, Lrrc4c - leucine rich repeat containing 4…
GO:0097120	receptor localization to synapse	1.26e-06	0.000102	5.85	11164	35	600	11	[Arhgap44 - rho gtpase activating protein 44, Camk2a - calcium/calmodulin-dependent protein kinase ii alpha, Dlg4 - discs, large homolog 4 (drosophila), Kalrn - kalirin, rhogef kinase, Nrxn1 - neurexin i, Adam22 - a disintegrin and metallopeptidase domain 22, Anks1b - ankyrin repeat and sterile alpha motif domain containing 1b, Kif5a - kinesin family member 5a, Lrrc7 - leucine rich repeat contain…
GO:0070838	divalent metal ion transport	1.28e-06	0.000103	2.66	11164	203	600	29	[Atp2b2 - atpase, ca++ transporting, plasma membrane 2, Camk2a - calcium/calmodulin-dependent protein kinase ii alpha, Slc25a23 - solute carrier family 25 (mitochondrial carrier; phosphate carrier), member 23, Slc8a2 - solute carrier family 8 (sodium/calcium exchanger), member 2, P2ry12 - purinergic receptor p2y, g-protein coupled 12, Camk2b - calcium/calmodulin-dependent protein kinase ii, beta,…
GO:0072511	divalent inorganic cation transport	1.42e-06	0.000113	2.65	11164	204	600	29	[Atp2b2 - atpase, ca++ transporting, plasma membrane 2, Camk2a - calcium/calmodulin-dependent protein kinase ii alpha, Slc25a23 - solute carrier family 25 (mitochondrial carrier; phosphate carrier), member 23, Slc8a2 - solute carrier family 8 (sodium/calcium exchanger), member 2, P2ry12 - purinergic receptor p2y, g-protein coupled 12, Camk2b - calcium/calmodulin-dependent protein kinase ii, beta,…
GO:0050793	regulation of developmental process	1.52e-06	0.000121	1.45	11164	1767	600	138	[Myh14 - myosin, heavy polypeptide 14, Camk2a - calcium/calmodulin-dependent protein kinase ii alpha, Aatk - apoptosis-associated tyrosine kinase, Gdi1 - guanosine diphosphate (gdp) dissociation inhibitor 1, Nlgn2 - neuroligin 2, Ntrk3 - neurotrophic tyrosine kinase, receptor, type 3, P2ry12 - purinergic receptor p2y, g-protein coupled 12, Camk2b - calcium/calmodulin-dependent protein kinase ii, …
GO:0098930	axonal transport	1.54e-06	0.000122	4.84	11164	50	600	13	[Madd - map-kinase activating death domain, Map1a - microtubule-associated protein 1 a, Agtpbp1 - atp/gtp binding protein 1, Dlg2 - discs, large homolog 2 (drosophila), Ap3b2 - adaptor-related protein complex 3, beta 2 subunit, Kif1a - kinesin family member 1a, Hap1 - huntingtin-associated protein 1, Kif1b - kinesin family member 1b, Mapk8ip3 - mitogen-activated protein kinase 8 interacting prote…
GO:0097091	synaptic vesicle clustering	1.72e-06	0.000135	12.4	11164	9	600	6	[Nrxn1 - neurexin i, Syn2 - synapsin ii, Pclo - piccolo (presynaptic cytomatrix protein), Syn1 - synapsin i, Rab3a - rab3a, member ras oncogene family, Syn3 - synapsin iii]
GO:0007215	glutamate receptor signaling pathway	1.73e-06	0.000135	5.69	11164	36	600	11	[Camk2a - calcium/calmodulin-dependent protein kinase ii alpha, Plcb1 - phospholipase c, beta 1, Kalrn - kalirin, rhogef kinase, Grin1 - glutamate receptor, ionotropic, nmda1 (zeta 1), Grm7 - glutamate receptor, metabotropic 7, Grik3 - glutamate receptor, ionotropic, kainate 3, Grin2a - glutamate receptor, ionotropic, nmda2a (epsilon 1), Grin2b - glutamate receptor, ionotropic, nmda2b (epsilon 2)…
GO:0071805	potassium ion transmembrane transport	1.75e-06	0.000136	3.97	11164	75	600	16	[Kcnq2 - potassium voltage-gated channel, subfamily q, member 2, Kcnc3 - potassium voltage gated channel, shaw-related subfamily, member 3, Kcnc1 - potassium voltage gated channel, shaw-related subfamily, member 1, Kcnd2 - potassium voltage-gated channel, shal-related family, member 2, Kcnf1 - potassium voltage-gated channel, subfamily f, member 1, Hcn1 - hyperpolarization-activated, cyclic nucle…
GO:0071804	cellular potassium ion transport	1.75e-06	0.000135	3.97	11164	75	600	16	[Kcnq2 - potassium voltage-gated channel, subfamily q, member 2, Kcnc3 - potassium voltage gated channel, shaw-related subfamily, member 3, Kcnc1 - potassium voltage gated channel, shaw-related subfamily, member 1, Kcnd2 - potassium voltage-gated channel, shal-related family, member 2, Kcnf1 - potassium voltage-gated channel, subfamily f, member 1, Hcn1 - hyperpolarization-activated, cyclic nucle…
GO:0008344	adult locomotory behavior	1.82e-06	0.00014	3.77	11164	84	600	17	[Sez6 - seizure related gene 6, Glra1 - glycine receptor, alpha 1 subunit, Glrb - glycine receptor, beta subunit, Agtpbp1 - atp/gtp binding protein 1, Adam22 - a disintegrin and metallopeptidase domain 22, Nlgn2 - neuroligin 2, Cacna1a - calcium channel, voltage-dependent, p/q type, alpha 1a subunit, Cacna1c - calcium channel, voltage-dependent, l type, alpha 1c subunit, Prex2 - phosphatidylinosi…
GO:0031644	regulation of neurological system process	1.89e-06	0.000144	3.2	11164	122	600	21	[Igsf9b - immunoglobulin superfamily, member 9b, Shank2 - sh3/ankyrin domain gene 2, Glra1 - glycine receptor, alpha 1 subunit, Dlgap2 - discs, large (drosophila) homolog-associated protein 2, Syne1 - spectrin repeat containing, nuclear envelope 1, Dbn1 - drebrin 1, Nlgn2 - neuroligin 2, Begain - brain-enriched guanylate kinase-associated, Adrb2 - adrenergic receptor, beta 2, Abat - 4-aminobutyra…
GO:0051965	positive regulation of synapse assembly	2.02e-06	0.000154	4.42	11164	59	600	14	[Lphn1 - latrophilin 1, Clstn3 - calsyntenin 3, Ptprd - protein tyrosine phosphatase, receptor type, d, Lrrc4b - leucine rich repeat containing 4b, Slitrk5 - slit and ntrk-like family, member 5, Ephb1 - eph receptor b1, Nlgn2 - neuroligin 2, Ntrk3 - neurotrophic tyrosine kinase, receptor, type 3, Eef2k - eukaryotic elongation factor-2 kinase, Prkca - protein kinase c, alpha, Nrxn1 - neurexin i, A…
GO:0031646	positive regulation of neurological system process	2.02e-06	0.000153	4.42	11164	59	600	14	[Shank2 - sh3/ankyrin domain gene 2, Igsf9b - immunoglobulin superfamily, member 9b, Nlgn2 - neuroligin 2, Dbn1 - drebrin 1, Adrb2 - adrenergic receptor, beta 2, Abat - 4-aminobutyrate aminotransferase, Rims2 - regulating synaptic membrane exocytosis 2, Tenm4 - teneurin transmembrane protein 4, Dlg4 - discs, large homolog 4 (drosophila), Nrxn1 - neurexin i, Rapgef4 - rap guanine nucleotide exchan…
GO:0043087	regulation of GTPase activity	2.06e-06	0.000155	2.46	11164	242	600	32	[Grlf1 - glucocorticoid receptor dna binding factor 1, Arrb1 - arrestin, beta 1, Rasgrf1 - ras protein-specific guanine nucleotide-releasing factor 1, Plxnb1 - plexin b1, Ntrk3 - neurotrophic tyrosine kinase, receptor, type 3, Rap1gap - rap1 gtpase-activating protein, Iqsec3 - iq motif and sec7 domain 3, Kalrn - kalirin, rhogef kinase, Plxna4 - plexin a4, Dock9 - dedicator of cytokinesis 9, Arap3…
GO:2000463	positive regulation of excitatory postsynaptic potential	2.11e-06	0.000157	6.2	11164	30	600	10	[Rims2 - regulating synaptic membrane exocytosis 2, Shank2 - sh3/ankyrin domain gene 2, Dlg4 - discs, large homolog 4 (drosophila), Nrxn1 - neurexin i, Grin1 - glutamate receptor, ionotropic, nmda1 (zeta 1), Dbn1 - drebrin 1, Nlgn2 - neuroligin 2, Grin2a - glutamate receptor, ionotropic, nmda2a (epsilon 1), Adrb2 - adrenergic receptor, beta 2, Shank1 - sh3/ankyrin domain gene 1]
GO:0032411	positive regulation of transporter activity	2.16e-06	0.000161	3.72	11164	85	600	17	[Kcnc1 - potassium voltage gated channel, shaw-related subfamily, member 1, Ryr2 - ryanodine receptor 2, cardiac, Wnk2 - wnk lysine deficient protein kinase 2, Ehd3 - eh-domain containing 3, Ank3 - ankyrin 3, epithelial, Hcn1 - hyperpolarization-activated, cyclic nucleotide-gated k+ 1, Fam115a - family with sequence similarity 115, member a, Dmd - dystrophin, muscular dystrophy, Adrb2 - adrenergi…
GO:0007411	axon guidance	2.45e-06	0.000181	3.05	11164	134	600	22	[Tubb3 - tubulin, beta 3 class iii, Grlf1 - glucocorticoid receptor dna binding factor 1, Unc5c - unc-5 homolog c (c. elegans), Apbb1 - amyloid beta (a4) precursor protein-binding, family b, member 1, Unc5a - unc-5 homolog a (c. elegans), Epha5 - eph receptor a5, Epha6 - eph receptor a6, Ank3 - ankyrin 3, epithelial, Lmtk2 - lemur tyrosine kinase 2, Ephb1 - eph receptor b1, Myh10 - myosin, heavy …
GO:0098828	modulation of inhibitory postsynaptic potential	2.53e-06	0.000186	15.51	11164	6	600	5	[Igsf9b - immunoglobulin superfamily, member 9b, Rims2 - regulating synaptic membrane exocytosis 2, Nlgn2 - neuroligin 2, Dbn1 - drebrin 1, Abat - 4-aminobutyrate aminotransferase]
GO:1990504	dense core granule exocytosis	2.53e-06	0.000185	15.51	11164	6	600	5	[Stxbp1 - syntaxin binding protein 1, Cadps - ca2+-dependent secretion activator, Unc13c - unc-13 homolog c (c. elegans), Unc13a - unc-13 homolog a (c. elegans), Cadps2 - ca2+-dependent activator protein for secretion 2]
GO:0043266	regulation of potassium ion transport	2.87e-06	0.000209	4.04	11164	69	600	15	[Kcnc1 - potassium voltage gated channel, shaw-related subfamily, member 1, Wnk2 - wnk lysine deficient protein kinase 2, Ank3 - ankyrin 3, epithelial, Rgs7 - regulator of g protein signaling 7, Dpp10 - dipeptidylpeptidase 10, Adrb2 - adrenergic receptor, beta 2, Akap6 - a kinase (prka) anchor protein 6, Casq2 - calsequestrin 2, Dpp6 - dipeptidylpeptidase 6, Kcna1 - potassium voltage-gated channe…
GO:1900449	regulation of glutamate receptor signaling pathway	2.92e-06	0.000211	4.96	11164	45	600	12	[Rph3a - rabphilin 3a, Shank2 - sh3/ankyrin domain gene 2, Frrs1l - ferric-chelate reductase 1 like, Dlg4 - discs, large homolog 4 (drosophila), Nrxn1 - neurexin i, Rasgrf1 - ras protein-specific guanine nucleotide-releasing factor 1, Nlgn2 - neuroligin 2, Grin2a - glutamate receptor, ionotropic, nmda2a (epsilon 1), Unc13a - unc-13 homolog a (c. elegans), Adrb2 - adrenergic receptor, beta 2, Shan…
GO:0097485	neuron projection guidance	3.16e-06	0.000227	3.01	11164	136	600	22	[Tubb3 - tubulin, beta 3 class iii, Grlf1 - glucocorticoid receptor dna binding factor 1, Unc5c - unc-5 homolog c (c. elegans), Apbb1 - amyloid beta (a4) precursor protein-binding, family b, member 1, Unc5a - unc-5 homolog a (c. elegans), Epha5 - eph receptor a5, Epha6 - eph receptor a6, Ank3 - ankyrin 3, epithelial, Lmtk2 - lemur tyrosine kinase 2, Ephb1 - eph receptor b1, Myh10 - myosin, heavy …
GO:0051130	positive regulation of cellular component organization	3.56e-06	0.000255	1.62	11164	986	600	86	[Arrb1 - arrestin, beta 1, Grlf1 - glucocorticoid receptor dna binding factor 1, Shank2 - sh3/ankyrin domain gene 2, Gdi1 - guanosine diphosphate (gdp) dissociation inhibitor 1, Syt7 - synaptotagmin vii, Fez1 - fasciculation and elongation protein zeta 1 (zygin i), Nlgn2 - neuroligin 2, Ntrk3 - neurotrophic tyrosine kinase, receptor, type 3, P2ry12 - purinergic receptor p2y, g-protein coupled 12,…
GO:0032414	positive regulation of ion transmembrane transporter activity	3.61e-06	0.000257	3.77	11164	79	600	16	[Kcnc1 - potassium voltage gated channel, shaw-related subfamily, member 1, Ryr2 - ryanodine receptor 2, cardiac, Wnk2 - wnk lysine deficient protein kinase 2, Ehd3 - eh-domain containing 3, Ank3 - ankyrin 3, epithelial, Hcn1 - hyperpolarization-activated, cyclic nucleotide-gated k+ 1, Fam115a - family with sequence similarity 115, member a, Dmd - dystrophin, muscular dystrophy, Akap6 - a kinase …
GO:0016192	vesicle-mediated transport	3.67e-06	0.00026	1.69	11164	825	600	75	[Arrb1 - arrestin, beta 1, Gdi1 - guanosine diphosphate (gdp) dissociation inhibitor 1, Syt7 - synaptotagmin vii, Sec16b - sec16 homolog b (s. cerevisiae), Nlgn2 - neuroligin 2, Gria2 - glutamate receptor, ionotropic, ampa2 (alpha 2), Gria1 - glutamate receptor, ionotropic, ampa1 (alpha 1), Myh10 - myosin, heavy polypeptide 10, non-muscle, Nedd4 - neural precursor cell expressed, developmentally …
GO:0051649	establishment of localization in cell	4.07e-06	0.000287	1.56	11164	1155	600	97	[Syt7 - synaptotagmin vii, Nlgn2 - neuroligin 2, Mapk8ip3 - mitogen-activated protein kinase 8 interacting protein 3, Gdap1 - ganglioside-induced differentiation-associated-protein 1, Nrxn1 - neurexin i, Ddx25 - dead (asp-glu-ala-asp) box polypeptide 25, Stxbp1 - syntaxin binding protein 1, Lrrc7 - leucine rich repeat containing 7, Nrxn3 - neurexin iii, Nrxn2 - neurexin ii, Ppfia3 - protein tyros…
GO:0051668	localization within membrane	4.24e-06	0.000297	3.15	11164	118	600	20	[Camk2a - calcium/calmodulin-dependent protein kinase ii alpha, Glrb - glycine receptor, beta subunit, Dnm3 - dynamin 3, Adam22 - a disintegrin and metallopeptidase domain 22, Myo6 - myosin vi, Dlg2 - discs, large homolog 2 (drosophila), Thy1 - thymus cell antigen 1, theta, Cacna1a - calcium channel, voltage-dependent, p/q type, alpha 1a subunit, Arhgap44 - rho gtpase activating protein 44, Dlg4 …
GO:1901379	regulation of potassium ion transmembrane transport	4.92e-06	0.000343	4.4	11164	55	600	13	[Kcnc1 - potassium voltage gated channel, shaw-related subfamily, member 1, Wnk2 - wnk lysine deficient protein kinase 2, Ank3 - ankyrin 3, epithelial, Rgs7 - regulator of g protein signaling 7, Dpp10 - dipeptidylpeptidase 10, Akap6 - a kinase (prka) anchor protein 6, Casq2 - calsequestrin 2, Kcna1 - potassium voltage-gated channel, shaker-related subfamily, member 1, Dpp6 - dipeptidylpeptidase 6…
GO:0097061	dendritic spine organization	5.6e-06	0.000389	5.64	11164	33	600	10	[Rph3a - rabphilin 3a, Shank2 - sh3/ankyrin domain gene 2, Itpka - inositol 1,4,5-trisphosphate 3-kinase a, Dlg4 - discs, large homolog 4 (drosophila), Ctnnd2 - catenin (cadherin associated protein), delta 2, Epha5 - eph receptor a5, Ephb1 - eph receptor b1, Grin2a - glutamate receptor, ionotropic, nmda2a (epsilon 1), Shank1 - sh3/ankyrin domain gene 1, Zfp365 - zinc finger protein 365]
GO:0019935	cyclic-nucleotide-mediated signaling	6.02e-06	0.000416	3.82	11164	73	600	15	[Gucy1b3 - guanylate cyclase 1, soluble, beta 3, Lphn1 - latrophilin 1, Epha5 - eph receptor a5, Adcy8 - adenylate cyclase 8, Pclo - piccolo (presynaptic cytomatrix protein), Adcy1 - adenylate cyclase 1, Adrb2 - adrenergic receptor, beta 2, Emr4 - egf-like module containing, mucin-like, hormone receptor-like sequence 4, Rims2 - regulating synaptic membrane exocytosis 2, Cd36 - cd36 antigen, Rapge…
GO:0051656	establishment of organelle localization	6.21e-06	0.000427	2.42	11164	231	600	30	[Syne1 - spectrin repeat containing, nuclear envelope 1, Fez1 - fasciculation and elongation protein zeta 1 (zygin i), Syt7 - synaptotagmin vii, Cadps - ca2+-dependent secretion activator, Agtpbp1 - atp/gtp binding protein 1, Unc13a - unc-13 homolog a (c. elegans), Kif1a - kinesin family member 1a, Myh10 - myosin, heavy polypeptide 10, non-muscle, Clmn - calmin, Kif1b - kinesin family member 1b, …
GO:0008088	axo-dendritic transport	6.89e-06	0.000471	4.01	11164	65	600	14	[Madd - map-kinase activating death domain, Map1a - microtubule-associated protein 1 a, Agtpbp1 - atp/gtp binding protein 1, Dlg2 - discs, large homolog 2 (drosophila), Ap3b2 - adaptor-related protein complex 3, beta 2 subunit, Kif1a - kinesin family member 1a, Hap1 - huntingtin-associated protein 1, Kif1b - kinesin family member 1b, Mapk8ip3 - mitogen-activated protein kinase 8 interacting prote…
GO:0051966	regulation of synaptic transmission, glutamatergic	7.52e-06	0.000512	4.24	11164	57	600	13	[Shank2 - sh3/ankyrin domain gene 2, Grm7 - glutamate receptor, metabotropic 7, Nlgn2 - neuroligin 2, Gria2 - glutamate receptor, ionotropic, ampa2 (alpha 2), Mapk8ip2 - mitogen-activated protein kinase 8 interacting protein 2, Nrxn1 - neurexin i, Kalrn - kalirin, rhogef kinase, Stxbp1 - syntaxin binding protein 1, Grik3 - glutamate receptor, ionotropic, kainate 3, Dgki - diacylglycerol kinase, i…
GO:0061001	regulation of dendritic spine morphogenesis	7.68e-06	0.000521	4.56	11164	49	600	12	[Arhgap44 - rho gtpase activating protein 44, Arhgap33 - rho gtpase activating protein 33, Itpka - inositol 1,4,5-trisphosphate 3-kinase a, Dnm3 - dynamin 3, Kalrn - kalirin, rhogef kinase, Srcin1 - src kinase signaling inhibitor 1, Dbn1 - drebrin 1, Lrrk2 - leucine-rich repeat kinase 2, Ngef - neuronal guanine nucleotide exchange factor, Sipa1l1 - signal-induced proliferation-associated 1 like 1…
GO:0120036	plasma membrane bounded cell projection organization	8.35e-06	0.000563	1.9	11164	490	600	50	[Grlf1 - glucocorticoid receptor dna binding factor 1, Celsr2 - cadherin, egf lag seven-pass g-type receptor 2 (flamingo homolog, drosophila), Shank2 - sh3/ankyrin domain gene 2, Rasgrf1 - ras protein-specific guanine nucleotide-releasing factor 1, Nefh - neurofilament, heavy polypeptide, P2ry12 - purinergic receptor p2y, g-protein coupled 12, Myh10 - myosin, heavy polypeptide 10, non-muscle, Atc…
GO:0046958	nonassociative learning	8.46e-06	0.000568	13.29	11164	7	600	5	[Kalrn - kalirin, rhogef kinase, Dgki - diacylglycerol kinase, iota, Grin2b - glutamate receptor, ionotropic, nmda2b (epsilon 2), Shank1 - sh3/ankyrin domain gene 1, Mapk8ip2 - mitogen-activated protein kinase 8 interacting protein 2]
[truncated: 168 more rows]

## Sheet: Cx3cr1_up_GOprocess
GO Term	Description	P-value	FDR q-value	Enrichment	N	B	n	b	Genes
[truncated: 293 more rows]
