# Supplementary material for: Ribosomal profiling during prion disease uncovers progressive translational derangement in glia but not in neurons
Source: eLife. 2020 Sep 22;9:e62911. doi: 10.7554/eLife.62911 (PMC7527237; doi:10.7554/eLife.62911)
Supplement: Supplementary file 11. — Table showing Ensemble GeneID, MGI Symbol, information of genes being preferentially translated (column PTG), and difference analysis between prion disease (PrD) vs control (ctrl) samples of cell-type-specific translation at the terminal stage, and hippocampal RNA expression changes at 8 weeks post-inoculation (wpi), and the terminal stage of intraperitoneally (ip) inoculated mice, including mean of normalized RPFs per gene (baseMean), log2FC, pvalue and Benjamini-Hochberg adjusted p values (padj). [file elife-62911-supp11.xlsx]

## Sheet: SupplementaryFile11
GeneID	MGIsymbol	PTG	baseMean_CamKIIaCX_term	log2FC_CamKIIaCX_term	pvalue_CamKIIaCX_term	padj_CamKIIaCX_term	baseMean_CamKIIaHC_term	log2FC_CamKIIaHC_term	pvalue_CamKIIaHC_term	padj_CamKIIaHC_term	baseMean_PV_term	log2FC_PV_term	pvalue_PV_term	padj_PV_term	baseMean_GFAP_term	log2FC_GFAP_term	pvalue_GFAP_term	padj_GFAP_term	baseMean_Cx3Cr1_term	log2FC_Cx3Cr1_term	pvalue_Cx3Cr1_term	padj_Cx3Cr1_term	isPresent_RNAseq_8wpi_ip	log2FC_RNAseq_8wpi_ip	pvalue_RNAseq_8wpi_ip	padj_RNAseq_8wpi_ip	isPresent_RNAseq_term_ip	log2FC_RNAseq_term_ip	pvalue_RNAseq_term_ip	padj_RNAseq_term_ip
ENSMUSG00000063897		none	10.2955	0.514508	0.529018	NA	8.35849	-1.14669	0.102271	NA	7.66571	-0.169624	0.800988	0.994132	20.8901	0.105477	0.796947	0.910294	14.6492	-0.259548	0.743368	0.914247	NA	NA	NA	NA	NA	NA	NA	NA
ENSMUSG00000095742		none	125.278	-0.108255	0.668962	0.897505	75.6047	-0.125552	0.620817	0.920898	39.0017	-0.00810759	0.978752	0.997323	115.002	1.56447	5.97479e-12	2.6572e-10	237.259	1.88766	7.83618e-11	5.33711e-09	NA	NA	NA	NA	NA	NA	NA	NA
ENSMUSG00000095041		none	72.633	0.939803	0.00393938	NA	37.3349	0.387392	0.267611	0.733675	24.2832	-0.0989663	0.794868	0.994132	40.371	0.0273956	0.934455	0.975452	18.2877	-0.98791	0.16928	0.478003	NA	NA	NA	NA	NA	NA	NA	NA
ENSMUSG00000007777	0610009B22Rik	none	84.4357	0.181759	0.543943	NA	145.502	0.0135993	0.940942	0.989562	151.197	0.0703614	0.720924	0.993224	138.129	-0.094587	0.634589	0.819442	54.0199	0.206109	0.652204	0.875211	TRUE	0.1243	0.4669	0.9999	TRUE	-0.00079	0.9963	0.9985
ENSMUSG00000043644	0610009L18Rik	none	12.6	1.04144	0.168132	NA	11.8622	-1.13664	0.0503461	NA	6.26941	0.373979	0.605527	0.989253	33.5862	0.485994	0.139495	0.348091	NA	NA	NA	NA	TRUE	-0.2113	0.5076	0.9999	TRUE	0.1531	0.6039	0.76
ENSMUSG00000042208	0610010F05Rik	none	294.319	-0.261626	0.14243	0.503613	407.865	0.194883	0.257592	0.72453	260.461	0.101489	0.529383	0.979024	139.659	0.343986	0.0966229	0.275686	47.9893	0.0750844	0.875544	0.96708	TRUE	-0.06697	0.5321	0.9999	TRUE	-0.03128	0.7699	0.8713
ENSMUSG00000107002	0610012G03Rik	none	66.3241	-0.0328973	0.920748	NA	45.6095	-0.0147157	0.96351	0.99277	51.5964	0.0942716	0.731928	0.994132	71.4941	-0.19968	0.442352	0.681017	15.2894	1.4264	0.0844174	0.313486	TRUE	-0.002496	0.9861	0.9999	TRUE	-0.2163	0.104	0.2286
ENSMUSG00000058706	0610030E20Rik	none	NA	NA	NA	NA	4.01547	-0.39799	0.697565	NA	NA	NA	NA	NA	8.094	-0.573908	0.367948	0.614797	28.781	-0.350406	0.551184	0.823593	TRUE	-0.03413	0.7693	0.9999	TRUE	0.1529	0.1676	0.3241
ENSMUSG00000089889	0610040B10Rik	none	15.3706	0.65965	0.327326	NA	15.1152	-0.369296	0.474167	0.866068	6.78921	0.286459	0.672192	0.991361	26.4847	1.25009	0.0011631	0.00996261	NA	NA	NA	NA	TRUE	-1.2	0.002833	0.1766	TRUE	0.2635	0.4092	0.5976
ENSMUSG00000087341	0610040F04Rik	none	NA	NA	NA	NA	NA	NA	NA	NA	NA	NA	NA	NA	NA	NA	NA	NA	NA	NA	NA	NA	TRUE	-0.2016	0.5882	0.9999	TRUE	0.3876	0.2101	0.3825
ENSMUSG00000060512	0610040J01Rik	none	NA	NA	NA	NA	NA	NA	NA	NA	NA	NA	NA	NA	40.632	-0.213538	0.462689	0.698387	76.8689	-0.62592	0.114486	0.380101	TRUE	0.3142	0.22	0.9954	TRUE	0.4138	0.05586	0.1442
ENSMUSG00000090066	1110002E22Rik	none	12.1134	-0.586088	0.440214	NA	5.85651	1.06	0.21883	NA	NA	NA	NA	NA	3.16574	0.279554	0.788991	0.90602	NA	NA	NA	NA	NA	NA	NA	NA	NA	NA	NA	NA
ENSMUSG00000071456	1110002L01Rik	none	21.6025	0.325264	0.573148	NA	13.2518	-0.0391572	0.946243	0.990412	9.03515	-0.978788	0.114761	0.77722	29.3656	-1.09985	0.00228479	0.0171131	7.54894	0.107689	0.921705	0.981228	TRUE	0.2101	0.1948	0.9879	TRUE	-0.3453	0.02899	0.08654
ENSMUSG00000030663	1110004F10Rik	none	397.48	-0.141319	0.393635	0.746834	439.229	0.450178	0.0115168	0.166258	231.954	0.208328	0.196008	0.878246	282.468	0.468437	0.018275	0.0870808	68.3993	0.683892	0.112483	0.375017	TRUE	-0.1109	0.2337	0.9954	TRUE	0.02752	0.7569	0.8626
ENSMUSG00000039195	1110008P14Rik	none	721.989	-0.0121847	0.929573	0.983613	322.212	-0.363552	0.0148783	0.192105	277.853	0.186168	0.249741	0.915168	352.874	1.19482	7.7964e-12	3.42466e-10	19.3291	-6.67007e-05	0.999925	0.999934	TRUE	-0.2039	0.2588	0.9999	TRUE	-0.2907	0.09864	0.2201
ENSMUSG00000045237	1110012L19Rik	none	37.6246	0.570453	0.18976	NA	28.8121	-0.122277	0.758089	0.955215	29.5437	0.176874	0.642297	0.991361	40.7873	-0.0699626	0.81414	0.919287	14.2464	0.00496713	0.99507	0.997941	TRUE	0.2251	0.2809	0.9999	TRUE	0.1415	0.4537	0.6379
ENSMUSG00000028441	1110017D15Rik	none	7.24346	-0.596871	0.547066	NA	4.50654	-0.556726	0.553995	NA	9.07292	0.738562	0.244167	0.911216	35.0505	-0.628186	0.0878614	0.259724	NA	NA	NA	NA	TRUE	0.4625	0.1884	0.9878	TRUE	0.2088	0.4876	0.6674
ENSMUSG00000085151	1110018N20Rik	none	20.7088	0.115437	0.844071	NA	7.06519	-1.10615	0.185061	NA	NA	NA	NA	NA	7.05733	0.336237	0.615602	0.806194	NA	NA	NA	NA	NA	NA	NA	NA	NA	NA	NA	NA
ENSMUSG00000097616	1110019D14Rik	none	NA	NA	NA	NA	NA	NA	NA	NA	NA	NA	NA	NA	21.4297	-0.276297	0.482779	0.713891	5.05902	0.38792	0.772336	0.926487	TRUE	0.4222	0.214	0.9954	TRUE	-0.08976	0.7735	0.8735
ENSMUSG00000037971	1110032A03Rik	none	61.2877	-0.0702826	0.838721	NA	56.6211	0.0209932	0.940265	0.989562	61.6147	0.155257	0.543306	0.980148	85.4622	0.212855	0.339386	0.588998	25.007	0.0148675	0.980992	0.993629	TRUE	0.1172	0.3938	0.9999	TRUE	0.03468	0.7678	0.8697
ENSMUSG00000046999	1110032F04Rik	none	23.2157	-0.788449	0.157206	NA	8.38452	-0.370777	0.601898	NA	NA	NA	NA	NA	5.37868	0.274265	0.71662	0.866621	NA	NA	NA	NA	TRUE	-0.2792	0.1857	0.9878	TRUE	-1.148	9.186e-09	1.198e-07
ENSMUSG00000092203	1110038B12Rik	none	30.7706	0.242547	0.611741	NA	59.9696	0.629346	0.0533477	0.383235	21.403	0.100102	0.801157	0.994132	70.8567	1.13245	1.6672e-05	0.000255649	11.9704	0.278787	0.755368	0.919673	TRUE	-0.01363	0.9489	0.9999	TRUE	0.6624	0.0001946	0.001239
ENSMUSG00000063236	1110038F14Rik	none	46.6567	0.0390394	0.920407	NA	54.9183	-0.398671	0.204944	0.674243	32.895	0.106507	0.737408	0.994132	74.5399	0.703104	0.00408904	0.0275484	30.8929	0.0263189	0.964785	0.990939	TRUE	-0.07709	0.644	0.9999	TRUE	0.3525	0.02582	0.07923
ENSMUSG00000085457	1110046J04Rik	none	5.80407	0.36787	0.731284	NA	NA	NA	NA	NA	NA	NA	NA	NA	6.62184	0.971546	0.162238	0.382386	NA	NA	NA	NA	TRUE	-0.008967	0.9783	0.9999	TRUE	0.1391	0.6467	0.7893
ENSMUSG00000040591	1110051M20Rik	none	490.407	0.323051	0.053796	0.329554	590.464	-0.0951634	0.416016	0.838155	288.251	0.351862	0.0177277	0.4354	201.717	0.0151632	0.93141	0.974202	33.3065	-0.586695	0.309363	0.642835	TRUE	0.02125	0.8245	0.9999	TRUE	-0.2456	0.009659	0.0358
ENSMUSG00000035171	1110059E24Rik	none	98.7686	-0.121163	0.669274	0.897505	118.405	0.144261	0.500947	0.87769	112.403	-0.224015	0.263129	0.920115	113.4	0.0610579	0.761358	0.893183	28.9775	0.301316	0.610447	0.851184	TRUE	0.08533	0.5766	0.9999	TRUE	-0.02889	0.8211	0.9025
ENSMUSG00000032551	1110059G10Rik	none	116.713	-0.394482	0.134618	0.494568	137.812	0.257897	0.194673	0.663231	114.102	0.0270799	0.89301	0.994132	117.571	0.340059	0.120195	0.317583	95.9824	0.521917	0.146416	0.440244	TRUE	-0.125	0.4882	0.9999	TRUE	0.1313	0.3864	0.5748
ENSMUSG00000078570	1110065P20Rik	none	38.354	0.615447	0.15589	NA	44.7999	-0.479684	0.117066	0.547711	26.2382	-0.0525288	0.884692	0.994132	42.4525	0.144089	0.623464	0.811704	7.68765	1.38631	0.240191	0.569493	TRUE	-0.113	0.4482	0.9999	TRUE	-0.1354	0.3196	0.5097
ENSMUSG00000063320	1190007I07Rik	none	14.1259	0.0177796	0.979695	NA	29.396	0.0229855	0.95008	0.991234	27.316	-0.078057	0.822313	0.994132	32.9432	-0.110215	0.738858	0.880242	16.5279	-0.34041	0.650664	0.873931	TRUE	0.0204	0.9396	0.9999	TRUE	0.02196	0.926	0.964
ENSMUSG00000097290	1300002E11Rik	none	36.3124	0.349356	0.428712	NA	17.3305	0.82971	0.0905965	0.490545	27.6577	0.0556671	0.876503	0.994132	59.203	0.229909	0.44131	0.680508	13.6993	0.60479	0.476757	0.77725	TRUE	-0.02551	0.8794	0.9999	TRUE	0.009641	0.9562	0.9794
ENSMUSG00000096221	1500002C15Rik	none	3.93713	0.281046	0.83229	NA	NA	NA	NA	NA	NA	NA	NA	NA	NA	NA	NA	NA	NA	NA	NA	NA	NA	NA	NA	NA	NA	NA	NA	NA
ENSMUSG00000098912	1500004A13Rik	none	131.134	0.48541	0.056062	0.336894	100.331	-0.109245	0.608478	0.917417	115.041	0.195067	0.33126	0.947673	74.721	0.0591251	0.799911	0.911425	5.4028	0.355305	0.785398	0.930512	TRUE	0.3425	0.01337	0.4162	TRUE	-0.5879	2.426e-06	2.272e-05
ENSMUSG00000068099	1500009C09Rik	none	116.111	0.405549	0.118638	0.473495	61.2361	-0.710399	0.00688588	0.120799	255.958	-0.0318569	0.837537	0.994132	329.07	-0.576499	0.000551332	0.00526124	11.1409	-1.02628	0.276989	0.609008	TRUE	0.006008	0.9532	0.9999	TRUE	-0.1731	0.08683	0.2005
ENSMUSG00000087651	1500009L16Rik	none	20.2027	-0.605841	0.299159	NA	25.1665	0.0458583	0.909234	0.983695	10.115	0.253541	0.659633	0.991361	23.5559	0.939405	0.0145619	0.073536	NA	NA	NA	NA	TRUE	0.1413	0.4533	0.9999	TRUE	-0.09055	0.5902	0.7494
ENSMUSG00000072694	1500011B03Rik	none	61.1531	0.339253	0.332918	NA	47.4543	-0.232875	0.431966	0.847581	48.8862	0.0667424	0.810881	0.994132	45.5398	0.737021	0.0101591	0.0564544	4.40413	2.13042	0.199753	0.521027	TRUE	0.07182	0.4613	0.9999	TRUE	-0.2556	0.007399	0.02884
ENSMUSG00000097247	1500012K07Rik	none	NA	NA	NA	NA	NA	NA	NA	NA	NA	NA	NA	NA	NA	NA	NA	NA	NA	NA	NA	NA	NA	NA	NA	NA	NA	NA	NA	NA
ENSMUSG00000097383	1500026H17Rik	none	16.9647	-0.569455	0.378124	NA	20.4595	0.124075	0.777144	0.959607	13.7563	0.047553	0.923664	0.994877	50.9742	0.0181983	0.949003	0.98073	NA	NA	NA	NA	NA	NA	NA	NA	NA	NA	NA	NA
ENSMUSG00000035595	1600002K03Rik	none	7.16483	-1.19014	0.233356	NA	7.58042	0.465438	0.514135	NA	NA	NA	NA	NA	11.5383	-0.730104	0.173346	0.398354	11.7487	1.89782	0.0798628	0.301975	TRUE	0.5099	0.07686	0.83	TRUE	-0.4921	0.09132	0.2081
ENSMUSG00000050088	1600012H06Rik	none	65.7999	-0.0521845	0.875256	NA	55.4747	0.154161	0.583427	0.908168	72.1754	-0.336392	0.171818	0.853254	88.551	-0.157583	0.504623	0.728939	69.0117	0.547391	0.179815	0.493472	TRUE	-0.1026	0.4712	0.9999	TRUE	0.1373	0.2771	0.4612
ENSMUSG00000054676	1600014C10Rik	none	65.0415	0.124727	0.710702	NA	63.5264	-0.081388	0.771516	0.959077	73.4908	-0.053647	0.814098	0.994132	68.3195	0.64431	0.0109409	0.0595471	69.9186	1.41213	0.00211574	0.0223957	TRUE	0.07671	0.4699	0.9999	TRUE	0.106	0.3373	0.5271
ENSMUSG00000097048	1600020E01Rik	none	7.9242	-0.355779	0.711199	NA	7.7503	-0.219662	0.766131	NA	4.58068	1.17337	0.161251	0.844214	11.092	0.381853	0.491565	0.720384	NA	NA	NA	NA	TRUE	0.06736	0.7619	0.9999	TRUE	-0.0565	0.8088	0.8942
ENSMUSG00000057818	1600029O15Rik	none	4.70548	0.390052	0.745745	NA	6.15836	0.692879	0.397982	NA	NA	NA	NA	NA	NA	NA	NA	NA	NA	NA	NA	NA	TRUE	0.02771	0.9179	0.9999	TRUE	0.09079	0.7174	0.8387
ENSMUSG00000075511	1700001L05Rik	none	8.74051	0.999743	0.27933	NA	6.06676	0.660487	0.403217	NA	NA	NA	NA	NA	NA	NA	NA	NA	NA	NA	NA	NA	TRUE	-0.3881	0.05999	0.7776	TRUE	-0.1058	0.5207	0.6944
ENSMUSG00000021534	1700001L19Rik	none	75.4137	0.0888689	0.780868	NA	36.2639	-0.49922	0.156104	0.609054	6.2299	0.0813716	0.909234	0.994132	29.5942	-0.0506099	0.890446	0.956043	NA	NA	NA	NA	TRUE	-0.06122	0.7964	0.9999	TRUE	-0.9275	6.829e-05	0.0004882
ENSMUSG00000044320	1700001O22Rik	none	5.07487	1.0607	0.368725	NA	NA	NA	NA	NA	NA	NA	NA	NA	NA	NA	NA	NA	NA	NA	NA	NA	TRUE	-0.1642	0.6098	0.9999	TRUE	-0.1095	0.6637	0.8018
ENSMUSG00000030030	1700003E16Rik	none	59.3463	-0.0605959	0.875282	NA	28.7038	0.0154031	0.967387	0.993322	7.98073	-0.1113	0.858587	0.994132	27.805	-0.23259	0.512137	0.734578	NA	NA	NA	NA	TRUE	-0.07257	0.706	0.9999	TRUE	-0.4352	0.01485	0.05071
ENSMUSG00000085389	1700003M07Rik	none	8.30239	0.64525	0.486378	NA	8.36925	-0.351641	0.605733	NA	NA	NA	NA	NA	86.8934	-0.896964	0.000416	0.00414143	NA	NA	NA	NA	TRUE	-0.09979	0.5015	0.9999	TRUE	-0.4569	0.0002809	0.00171
ENSMUSG00000026831	1700007K13Rik	none	15.5849	-0.515037	0.448774	NA	6.1401	-1.45243	0.105402	NA	7.72166	0.540805	0.393032	0.957654	63.6845	0.00868405	0.972371	0.988927	NA	NA	NA	NA	TRUE	1.291	0.001423	0.1228	TRUE	0.4741	0.1809	0.3427
ENSMUSG00000089730	1700007P06Rik	none	NA	NA	NA	NA	NA	NA	NA	NA	NA	NA	NA	NA	NA	NA	NA	NA	NA	NA	NA	NA	FALSE	-0.3564	0.6223	NA	TRUE	-0.2574	0.591	0.75
ENSMUSG00000023873	1700010I14Rik	none	5.62919	0.283031	0.795374	NA	8.69165	0.838161	0.228639	NA	NA	NA	NA	NA	6.43034	0.842532	0.232981	0.474538	12.7118	-0.142105	0.875716	0.96708	TRUE	0.05521	0.8889	0.9999	TRUE	0.6813	0.04324	0.1188
ENSMUSG00000110424	1700012D14Rik	none	NA	NA	NA	NA	NA	NA	NA	NA	4.99143	-0.550475	0.490064	0.975974	7.60691	0.776941	0.256367	0.503147	NA	NA	NA	NA	TRUE	-0.527	0.2877	0.9999	TRUE	1.079	0.01209	0.043
ENSMUSG00000027886	1700013F07Rik	none	6.61103	0.173079	0.862947	NA	5.91567	0.291147	0.716437	NA	4.80834	1.44383	0.0926214	0.739079	7.64254	-0.722789	0.266748	0.513773	NA	NA	NA	NA	TRUE	0.4409	0.2405	0.9954	TRUE	0.2445	0.4344	0.6204
ENSMUSG00000051054	1700014D04Rik	none	11.8215	0.188858	0.807276	NA	3.3818	0.154568	0.89081	NA	NA	NA	NA	NA	NA	NA	NA	NA	NA	NA	NA	NA	NA	NA	NA	NA	NA	NA	NA	NA
ENSMUSG00000053783	1700016K19Rik	none	NA	NA	NA	NA	NA	NA	NA	NA	NA	NA	NA	NA	7.35142	-0.176867	0.793354	0.90855	NA	NA	NA	NA	TRUE	1.557	0.001518	0.1277	TRUE	-0.4619	0.3471	0.5366
ENSMUSG00000032300	1700017B05Rik	none	21.2527	1.31922	0.0384075	NA	33.9651	0.362505	0.317904	0.770243	14.2756	-0.0780374	0.86773	0.994132	41.126	0.0217304	0.943243	0.97907	204.857	-0.27137	0.371058	0.698458	TRUE	0.04847	0.766	0.9999	TRUE	0.4698	0.002811	0.01274
ENSMUSG00000043629	1700019D03Rik	none	20.9116	-0.474938	0.416602	NA	9.32222	-0.13736	0.832749	NA	20.3752	0.0256614	0.949215	0.995591	25.4366	-0.249849	0.507047	0.729845	NA	NA	NA	NA	TRUE	0.01064	0.9702	0.9999	TRUE	0.1826	0.515	0.6905
ENSMUSG00000019797	1700021F05Rik	none	107.661	-0.621988	0.0231131	0.210623	137.521	0.292511	0.129428	0.567418	140.61	0.0945783	0.61977	0.98964	113.387	0.171163	0.440871	0.680271	32.324	0.0741636	0.895643	0.97384	TRUE	-0.05182	0.756	0.9999	TRUE	-0.2041	0.146	0.2935
ENSMUSG00000032666	1700025G04Rik	none	87.206	-0.152835	0.606777	NA	109.662	-0.0626619	0.778972	0.959607	85.1187	-0.103445	0.643337	0.991361	90.9546	-0.00179941	0.993463	0.996753	10.4972	-0.528078	0.571591	0.83164	TRUE	-0.1139	0.1972	0.9879	TRUE	-0.3176	0.0004813	0.002748
ENSMUSG00000038782	1700028J19Rik	none	NA	NA	NA	NA	4.25102	-1.31422	0.186011	NA	4.61684	0.532545	0.534572	0.979472	NA	NA	NA	NA	NA	NA	NA	NA	TRUE	-0.5418	0.1713	0.9785	TRUE	-0.2716	0.4062	0.5948
ENSMUSG00000033053	1700028P14Rik	none	4.12233	-1.06874	0.408269	NA	4.3776	-0.350075	0.71321	NA	12.1404	-0.0597078	0.908671	0.994132	13.7999	-0.292857	0.559123	0.767672	NA	NA	NA	NA	TRUE	0.6105	0.1082	0.9015	TRUE	0.03045	0.9318	0.9666
ENSMUSG00000071103	1700029J07Rik	none	NA	NA	NA	NA	NA	NA	NA	NA	NA	NA	NA	NA	12.7675	0.353627	0.482542	0.713849	NA	NA	NA	NA	TRUE	0.1622	0.4669	0.9999	TRUE	0.2686	0.1893	0.3542
ENSMUSG00000031847	1700030J22Rik	none	28.991	-0.303122	0.537604	NA	24.669	-0.686698	0.0994728	0.510948	9.91648	-0.201194	0.720463	0.993224	13.5253	-1.03072	0.0490147	0.17568	NA	NA	NA	NA	TRUE	0.04608	0.8386	0.9999	TRUE	-0.1789	0.3375	0.5273
ENSMUSG00000052794	1700030K09Rik	none	43.2343	-0.316009	0.434835	NA	39.9121	0.229798	0.512494	0.88127	20.1874	-0.343012	0.407673	0.958839	17.6707	-0.266096	0.529059	0.747215	14.5082	-0.955958	0.26216	0.593542	TRUE	0.05412	0.7614	0.9999	TRUE	-0.07162	0.6224	0.773
ENSMUSG00000055833	1700034H15Rik	none	6.04747	1.26591	0.282187	NA	NA	NA	NA	NA	NA	NA	NA	NA	NA	NA	NA	NA	NA	NA	NA	NA	TRUE	-0.1776	0.49	0.9999	TRUE	-0.4324	0.07394	0.1777
ENSMUSG00000005983	1700037C18Rik	none	33.7451	0.735628	0.110768	NA	14.2591	0.126243	0.811454	0.968456	12.5748	0.823647	0.131872	0.80582	18.9946	0.274874	0.527673	0.746245	6.3245	1.25069	0.315555	0.64925	TRUE	-0.2637	0.4482	0.9999	TRUE	0.4568	0.1331	0.2743
ENSMUSG00000027327	1700037H04Rik	none	188.873	-0.0744268	0.726989	0.920049	138.293	-0.322424	0.0963446	0.504325	133.409	-0.0410572	0.824024	0.994132	101.046	0.11606	0.599487	0.795453	18.7511	0.507139	0.495681	0.791088	TRUE	-0.008084	0.9645	0.9999	TRUE	-0.09452	0.532	0.7028
ENSMUSG00000097515	1700040D17Rik	none	NA	NA	NA	NA	NA	NA	NA	NA	NA	NA	NA	NA	NA	NA	NA	NA	NA	NA	NA	NA	NA	NA	NA	NA	NA	NA	NA	NA
ENSMUSG00000085549	1700047F07Rik	none	14.758	-0.374081	0.587242	NA	NA	NA	NA	NA	12.9133	-0.689028	0.198557	0.879134	NA	NA	NA	NA	NA	NA	NA	NA	NA	NA	NA	NA	NA	NA	NA	NA
ENSMUSG00000043773	1700048O20Rik	none	NA	NA	NA	NA	NA	NA	NA	NA	3.89465	2.4331	0.0255867	0.485157	NA	NA	NA	NA	NA	NA	NA	NA	TRUE	0.158	0.5183	0.9999	TRUE	-0.7722	0.002575	0.01183
ENSMUSG00000099681	1700052K11Rik	none	11.4911	-0.225594	0.774531	NA	12.5864	0.386916	0.497406	0.876272	9.48557	-0.192047	0.750131	0.994132	12.1283	0.193651	0.704274	0.858821	NA	NA	NA	NA	TRUE	-0.1842	0.4397	0.9999	TRUE	-0.1144	0.5943	0.7526
ENSMUSG00000038323	1700066M21Rik	none	76.4728	-0.0973488	0.760897	NA	76.9824	-0.292191	0.222324	0.690279	25.6312	-0.412431	0.266699	0.921766	68.4891	-0.484847	0.0509775	0.179915	7.43833	0.738838	0.520366	0.805584	TRUE	0.002496	0.9848	0.9999	TRUE	-0.2093	0.06506	0.1613
ENSMUSG00000071265	1700086L19Rik	none	606.485	-0.378195	0.00750111	0.117467	635.963	-0.0515203	0.678222	0.935363	37.366	0.279091	0.370292	0.956332	407.879	-0.104691	0.558776	0.767323	12.3429	0.468334	0.592392	0.841764	TRUE	-0.2243	0.2018	0.9898	TRUE	-0.3616	0.01742	0.05777
ENSMUSG00000097080	1700086O06Rik	none	8.78918	-0.0816354	0.928901	NA	11.3068	-0.0260368	0.967259	NA	NA	NA	NA	NA	10.3123	0.405107	0.479945	0.712435	NA	NA	NA	NA	TRUE	-0.2551	0.397	0.9999	TRUE	0.2637	0.2846	0.4696
ENSMUSG00000115099	1700087I21Rik	none	18.4525	0.892507	0.149911	NA	24.9231	0.111965	0.781079	0.960503	6.62261	-0.372628	0.590257	0.98655	10.8917	0.702592	0.194918	0.42705	NA	NA	NA	NA	NA	NA	NA	NA	NA	NA	NA	NA
ENSMUSG00000033029	1700088E04Rik	none	29.3315	0.241689	0.65527	NA	22.9364	0.248954	0.562484	0.90142	11.9355	0.447481	0.38701	0.957654	79.9867	0.16457	0.48259	0.713849	NA	NA	NA	NA	TRUE	0.05217	0.8537	0.9999	TRUE	0.09987	0.6699	0.8064
ENSMUSG00000101856	1700096K18Rik	none	NA	NA	NA	NA	4.38563	-1.98675	0.0452371	NA	NA	NA	NA	NA	12.5899	0.0510324	0.920816	0.970642	6.23298	0.270507	0.831995	0.950407	TRUE	-0.4157	0.2374	0.9954	TRUE	0.3235	0.2662	0.4493
ENSMUSG00000097675	1700101I11Rik	none	8.35111	0.297547	0.741556	NA	4.38071	0.606483	0.520033	NA	NA	NA	NA	NA	5.098	1.20658	0.133102	0.338231	NA	NA	NA	NA	TRUE	0.4226	0.3829	0.9999	TRUE	0.4266	0.1928	0.359
ENSMUSG00000091329	1700112D23Rik	none	NA	NA	NA	NA	NA	NA	NA	NA	4.85905	-0.0509308	0.949668	0.995591	4.77854	1.80629	0.0463397	0.16902	NA	NA	NA	NA	NA	NA	NA	NA	NA	NA	NA	NA
ENSMUSG00000097527	1700112J16Rik	none	NA	NA	NA	NA	NA	NA	NA	NA	5.47274	-0.423383	0.577015	0.983338	5.21388	0.447421	0.581278	0.784079	NA	NA	NA	NA	NA	NA	NA	NA	NA	NA	NA	NA
ENSMUSG00000096935	1700113A16Rik	none	4.74428	-2.21929	0.0996244	NA	NA	NA	NA	NA	NA	NA	NA	NA	24.2679	-0.129643	0.728894	0.874493	NA	NA	NA	NA	TRUE	0.2038	0.5714	0.9999	TRUE	0.347	0.2968	0.4835
ENSMUSG00000100599	1700120C14Rik	none	NA	NA	NA	NA	NA	NA	NA	NA	NA	NA	NA	NA	5.97912	0.0536842	0.942634	0.97907	NA	NA	NA	NA	FALSE	-0.1473	0.8059	NA	FALSE	-0.05047	0.9347	NA
ENSMUSG00000085614	1700123M08Rik	none	10.3049	-0.213378	0.796088	NA	9.36658	0.464187	0.468818	NA	11.6313	0.0840773	0.879299	0.994132	29.1479	0.296987	0.380836	0.626291	4.27103	0.116568	0.937579	0.985448	TRUE	-0.09842	0.8007	0.9999	TRUE	0.5528	0.1136	0.2443
ENSMUSG00000040822	1700123O20Rik	none	39.0323	-0.0894409	0.846634	NA	29.9175	-0.41379	0.285624	0.748092	38.3348	0.445516	0.136503	0.81473	61.4335	-0.511992	0.0419632	0.157857	31.1433	0.220734	0.698584	0.897864	TRUE	0.2821	0.077	0.8304	TRUE	-0.08114	0.5945	0.7526
ENSMUSG00000078607	1810010H24Rik	none	9.29404	-0.255776	0.771919	NA	5.27759	0.4826	0.583254	NA	8.48978	0.861227	0.16311	0.845149	17.4158	-0.456622	0.287235	0.538344	NA	NA	NA	NA	TRUE	0.05089	0.8547	0.9999	TRUE	0.2305	0.3515	0.5412
ENSMUSG00000022507	1810013L24Rik	none	415.403	-0.191315	0.256034	0.645627	460.217	-0.338931	0.0118925	0.169846	415.526	-0.0257948	0.851914	0.994132	517.511	-0.321881	0.0271524	0.115779	120.173	0.791709	0.0215309	0.123497	TRUE	0.1531	0.179	0.9878	TRUE	0.06478	0.5286	0.7006
ENSMUSG00000044145	1810024B03Rik	none	NA	NA	NA	NA	4.18287	-0.225292	0.817922	NA	3.84729	1.32393	0.15523	0.836211	23.6115	-0.0970435	0.797904	0.910537	7.08385	0.915671	0.447968	0.759364	TRUE	0.8548	0.1254	0.9316	TRUE	0.3268	0.4122	0.6001
ENSMUSG00000101970	1810026B05Rik	none	24.7427	-0.109016	0.836344	NA	25.8587	-0.561666	0.173978	0.636294	30.4455	-0.0536774	0.872407	0.994132	49.2619	-0.0885401	0.752427	0.887739	8.29317	1.11223	0.304231	0.639262	TRUE	-0.05608	0.7828	0.9999	TRUE	0.114	0.4892	0.6686
ENSMUSG00000044148	1810030O07Rik	none	52.3335	-0.278034	0.468171	NA	71.084	-0.204157	0.399688	0.828962	46.7552	-0.00516737	0.985637	0.997323	87.4059	0.343089	0.121609	0.320254	80.9305	-0.114464	0.764836	0.923162	TRUE	0.1117	0.3878	0.9999	TRUE	0.09724	0.4338	0.6197
ENSMUSG00000054091	1810037I17Rik	none	82.6859	0.0625335	0.842999	NA	27.0145	0.0645934	0.874559	0.978534	44.0496	0.0157714	0.956022	0.995891	246.355	0.390265	0.0391182	0.150973	59.2599	-0.293672	0.505434	0.797552	TRUE	0.03136	0.8075	0.9999	TRUE	0.2743	0.02371	0.07378
ENSMUSG00000035372	1810055G02Rik	none	109.684	0.17574	0.510852	0.815417	72.0067	0.288285	0.242181	0.710946	84.3844	0.0523853	0.812072	0.994132	97.2848	0.552193	0.0114412	0.0614972	10.7882	0.431795	0.645301	0.870751	TRUE	-0.1392	0.2937	0.9999	TRUE	-0.07146	0.5432	0.7121
ENSMUSG00000073155	1810058I24Rik	none	70.3112	-0.383185	0.235118	NA	87.2475	-0.0944465	0.700018	0.941925	59.6239	0.35496	0.178759	0.861781	299.032	1.28552	1.63882e-12	7.69599e-11	106.712	1.06435	0.00436293	0.0391875	TRUE	0.03975	0.8097	0.9999	TRUE	0.8071	7.214e-08	8.503e-07
ENSMUSG00000084925	1810062O18Rik	none	NA	NA	NA	NA	4.05302	0.00130354	0.998962	NA	NA	NA	NA	NA	5.00349	1.64376	0.0537622	0.185853	NA	NA	NA	NA	TRUE	-0.7519	0.08515	0.8502	TRUE	0.6065	0.09964	0.2217
ENSMUSG00000063018	2010204K13Rik	none	158.283	-0.600561	0.0116311	0.145546	236.822	0.176113	0.283441	0.747529	34.7824	0.109813	0.736395	0.994132	186.582	0.00694595	0.968899	0.987013	5.54096	0.438722	0.745731	0.916006	TRUE	0.1585	0.437	0.9999	TRUE	-0.306	0.05726	0.1466
ENSMUSG00000026090	2010300C02Rik	none	2323.52	-0.147795	0.215305	0.601936	3840.12	0.326007	0.00409086	0.0868947	138.485	-0.0311002	0.876849	0.994132	667.786	-0.241521	0.673516	0.841143	34.8765	-1.34108	0.0236961	0.132474	TRUE	-0.4946	1.57e-05	0.006392	TRUE	-0.1168	0.3831	0.572
ENSMUSG00000074829	2010315B03Rik	none	42.273	-0.260791	0.539702	NA	76.281	0.00213111	0.993259	0.998738	41.5125	0.0135602	0.962822	0.997183	49.0188	-0.215765	0.481852	0.713684	23.5292	0.630409	0.333628	0.665983	TRUE	0.1258	0.4379	0.9999	TRUE	-0.0485	0.7099	0.8337
ENSMUSG00000100691	2010320M18Rik	none	17.753	-0.020894	0.973436	NA	8.87477	-0.64031	0.403228	NA	16.3181	0.0768887	0.86615	0.994132	51.7267	0.635555	0.0191001	0.0898366	5.8448	1.26323	0.362157	0.692418	TRUE	-0.1306	0.6827	0.9999	TRUE	0.4609	0.1139	0.2448
ENSMUSG00000021550	2210016F16Rik	none	57.8467	-0.29854	0.402159	NA	84.8774	-0.0802647	0.736372	0.950034	31.7642	0.610652	0.0666351	0.673365	67.4881	0.0919621	0.732081	0.876357	63.7683	0.588466	0.183918	0.49988	TRUE	0.06647	0.7497	0.9999	TRUE	0.3847	0.01777	0.05866
ENSMUSG00000029559	2210016L21Rik	none	814.289	-0.0316008	0.814411	0.951136	693.175	-0.0835187	0.456928	0.858949	325.414	-0.00572011	0.971623	0.997323	274.528	-0.255707	0.166966	0.389782	50.7701	0.412817	0.369255	0.697422	TRUE	-0.08861	0.4251	0.9999	TRUE	-0.1559	0.1232	0.2595
ENSMUSG00000087380	2210408F21Rik	none	80.4211	-0.0781539	0.802913	NA	46.4464	0.180404	0.566467	0.902987	26.0977	-0.0959234	0.788321	0.994132	92.2587	0.514196	0.019922	0.0927915	5.33426	1.83123	0.19849	0.519044	TRUE	0.1256	0.5398	0.9999	TRUE	-0.141	0.4709	0.6534
ENSMUSG00000071252	2210408I21Rik	none	270.657	-0.193267	0.322328	0.696441	291.818	0.117893	0.433526	0.848676	170.282	0.19346	0.286438	0.932376	142.493	-0.257443	0.174484	0.400022	25.2919	0.307354	0.632835	0.8645	TRUE	-0.1709	0.3848	0.9999	TRUE	-0.1266	0.4779	0.6592
ENSMUSG00000032403	2300009A05Rik	none	12.2594	0.316332	0.672871	NA	19.3909	0.55631	0.239241	0.708157	27.5018	-0.291456	0.410748	0.958839	25.3094	-0.365818	0.327942	0.578058	6.44361	1.03878	0.441974	0.754818	TRUE	-0.2414	0.3706	0.9999	TRUE	-0.00201	0.9945	0.9977
ENSMUSG00000098332	2310009A05Rik	none	59.7039	-0.288247	0.406647	NA	80.1989	0.0938071	0.685687	0.937195	59.1109	-0.16982	0.513986	0.977753	90.6864	-0.233166	0.276736	0.525286	41.3277	0.668586	0.19439	0.512936	TRUE	0.2979	0.3463	0.9999	TRUE	-0.01186	0.9673	0.9849
ENSMUSG00000079283	2310009B15Rik	none	7.99162	0.354515	0.708786	NA	9.68136	0.883167	0.207851	NA	12.788	0.485784	0.342182	0.950864	16.8353	-0.0850616	0.84868	0.935587	3.37178	0.718615	0.684911	0.892324	TRUE	0.08936	0.7521	0.9999	TRUE	-0.03942	0.8772	0.9359
ENSMUSG00000097162	2310010J17Rik	none	5.6974	-0.700252	0.519421	NA	4.03528	-0.0524325	0.959554	NA	5.01123	-0.986859	0.21537	0.892104	53.8587	0.520492	0.0801018	0.243961	5.52295	2.09842	0.154438	0.452718	TRUE	-0.1535	0.6866	0.9999	TRUE	0.5112	0.1068	0.2335
ENSMUSG00000020133	2310011J03Rik	none	116.937	0.328115	0.204252	0.58928	54.9994	-0.0377086	0.896437	0.981872	61.3566	-0.0215333	0.932883	0.995591	115.042	0.11887	0.569029	0.775117	50.5812	-0.00972306	0.984111	0.994728	TRUE	0.06032	0.6761	0.9999	TRUE	-0.06198	0.6059	0.7611
ENSMUSG00000049643	2310022A10Rik	none	147.241	0.143473	0.536688	0.830638	116.436	-0.331193	0.109303	0.529992	84.2801	0.135027	0.544565	0.980148	59.2652	-0.120868	0.637084	0.820634	40.4373	0.933891	0.0988333	0.346154	TRUE	0.09793	0.4758	0.9999	TRUE	-0.06262	0.6092	0.7635
ENSMUSG00000031983	2310022B05Rik	none	42.4366	0.364677	0.373564	NA	37.0478	1.49977	4.87014e-05	0.00381949	64.5098	0.1967	0.467338	0.970586	515.279	-0.625017	0.00021165	0.00232962	28.1221	-0.258286	0.660228	0.879578	TRUE	-0.07426	0.4645	0.9999	TRUE	0.08664	0.4338	0.6197
ENSMUSG00000032062	2310030G06Rik	none	17.0907	-0.333878	0.608988	NA	5.24902	0.293032	0.752886	NA	7.63526	0.0598666	0.925579	0.994877	7.19089	-0.161131	0.81161	0.917994	NA	NA	NA	NA	TRUE	0.05889	0.8746	0.9999	TRUE	-0.3539	0.2514	0.4318
ENSMUSG00000020441	2310033P09Rik	none	30.2359	0.0875074	0.855696	NA	46.8142	-0.218891	0.45655	0.858949	20.9349	-0.63334	0.139667	0.817022	22.7403	0.56039	0.172917	0.397707	31.9544	-0.571149	0.31097	0.644825	TRUE	-0.02391	0.8848	0.9999	TRUE	-0.1357	0.3888	0.5774
ENSMUSG00000062619	2310039H08Rik	none	NA	NA	NA	NA	6.44321	0.160274	0.838471	NA	6.67269	0.818113	0.262753	0.920035	19.9849	0.77452	0.0843918	0.253008	7.39226	0.501457	0.654006	0.876113	TRUE	0.004629	0.9915	0.9999	TRUE	1.302	0.0007943	0.004281
ENSMUSG00000072852	2310040G07Rik	none	6.75724	-0.418907	0.680576	NA	5.73003	-0.985119	0.22961	NA	NA	NA	NA	NA	22.6983	0.584594	0.128114	0.329891	NA	NA	NA	NA	NA	NA	NA	NA	NA	NA	NA	NA
ENSMUSG00000101655	2310040G24Rik	none	3.66533	-2.22926	0.127497	NA	NA	NA	NA	NA	7.80394	-0.0955069	0.881095	0.994132	4.55158	0.698283	0.393576	0.638633	20.3226	-1.17979	0.086539	0.318942	TRUE	0.4367	0.3749	0.9999	TRUE	0.8246	0.04315	0.1186
ENSMUSG00000040177	2310057M21Rik	none	209.173	-0.235877	0.246125	0.636197	211.157	0.126186	0.452181	0.856869	154.619	0.246562	0.173607	0.85529	69.5277	-0.209715	0.395088	0.640212	22.4952	0.098025	0.8813	0.969286	TRUE	-0.04496	0.7693	0.9999	TRUE	-0.2182	0.1107	0.2398
ENSMUSG00000085379	2310058D17Rik	none	NA	NA	NA	NA	NA	NA	NA	NA	6.03787	0.809389	0.267877	0.922347	NA	NA	NA	NA	NA	NA	NA	NA	NA	NA	NA	NA	NA	NA	NA	NA
ENSMUSG00000050705	2310061I04Rik	none	269.094	-0.122624	0.527302	0.826793	198.088	-0.0126296	0.939536	0.989464	242.776	0.0211144	0.891053	0.994132	137.122	-0.385308	0.0414401	0.156599	18.0361	-0.135899	0.855297	0.95886	TRUE	-0.03423	0.7402	0.9999	TRUE	-0.1062	0.3637	0.5535
ENSMUSG00000045411	2410002F23Rik	none	109.591	0.457907	0.115991	0.468179	102.504	-0.000880995	0.996662	0.998967	53.3715	-0.292803	0.274215	0.924628	32.9974	0.0258293	0.937813	0.977171	8.58582	-0.653943	0.519158	0.804988	TRUE	-0.2231	0.03105	0.6026	TRUE	0.07148	0.4917	0.6705
ENSMUSG00000036873	2410004B18Rik	none	99.8934	0.0539689	0.851672	0.962157	94.4229	-0.237046	0.283795	0.747913	94.6113	-0.163224	0.461875	0.970586	121.31	-0.0757551	0.700491	0.856313	33.2649	0.308017	0.580937	0.835649	TRUE	0.1548	0.3233	0.9999	TRUE	-0.1972	0.1526	0.3028
ENSMUSG00000071398	2410004P03Rik	none	4.64698	0.366273	0.76091	NA	NA	NA	NA	NA	6.63966	0.411817	0.543595	0.980148	29.5733	0.116603	0.728675	0.87444	NA	NA	NA	NA	TRUE	1.123	0.01393	0.4248	TRUE	1.345	7.349e-06	6.345e-05
ENSMUSG00000086841	2410006H16Rik	none	16.9852	0.260105	0.68913	NA	9.50388	1.14075	0.0977458	NA	6.94585	-0.321751	0.636077	0.991361	8.64596	0.398019	0.509685	0.732605	10.6017	0.292909	0.761068	0.922514	TRUE	-0.01377	0.9503	0.9999	TRUE	0.5537	0.0008507	0.004537
ENSMUSG00000073164	2410018L13Rik	none	NA	NA	NA	NA	NA	NA	NA	NA	NA	NA	NA	NA	NA	NA	NA	NA	NA	NA	NA	NA	TRUE	-0.08879	0.7998	0.9999	TRUE	-0.8447	0.01373	0.04755
ENSMUSG00000044387	2410080I02Rik	none	NA	NA	NA	NA	3.97083	0.26362	0.798456	NA	NA	NA	NA	NA	NA	NA	NA	NA	NA	NA	NA	NA	NA	NA	NA	NA	NA	NA	NA	NA
ENSMUSG00000032840	2410131K14Rik	none	54.4235	0.35227	0.339289	NA	41.9404	-0.437286	0.206353	0.675557	104.469	-0.0666923	0.743166	0.994132	74.5555	0.349101	0.14703	0.359929	24.1667	-0.214931	0.743304	0.914247	TRUE	0.196	0.1793	0.9878	TRUE	0.08662	0.4751	0.6571
ENSMUSG00000073236	2500004C02Rik	none	14.0679	0.0955341	0.892891	NA	11.2672	-0.0921847	0.873826	NA	8.75468	-0.618195	0.314017	0.939405	14.5527	-0.00557987	0.991123	0.995656	NA	NA	NA	NA	TRUE	0.1548	0.4686	0.9999	TRUE	0.1677	0.3713	0.5611
ENSMUSG00000071632	2510002D24Rik	none	23.3335	-0.337257	0.545065	NA	22.8789	-0.440186	0.299933	0.759062	13.9335	0.103841	0.829147	0.994132	15.2498	-0.307881	0.50396	0.728649	4.96806	1.0681	0.450602	0.760942	TRUE	-0.2754	0.103	0.8929	TRUE	-0.1607	0.2896	0.4751
ENSMUSG00000043391	2510009E07Rik	none	86.9545	0.0188801	0.948398	NA	70.1044	-0.00212305	0.993413	0.998738	37.9172	-0.333226	0.28485	0.932376	141.336	0.0190782	0.924863	0.971511	90.9704	0.787113	0.0407044	0.192654	TRUE	-0.1953	0.046	0.7063	TRUE	-0.01666	0.8676	0.9305
ENSMUSG00000044496	2510039O18Rik	none	49.7766	0.194761	0.612517	NA	40.0152	-0.311139	0.332925	0.782507	26.7899	0.0634544	0.86373	0.994132	41.9025	0.0044335	0.9877	0.994387	54.8844	0.444562	0.324673	0.656542	TRUE	-0.1553	0.2987	0.9999	TRUE	0.2973	0.02169	0.06876
ENSMUSG00000100303	2600014E21Rik	none	4.11224	0.276503	0.836403	NA	NA	NA	NA	NA	NA	NA	NA	NA	NA	NA	NA	NA	NA	NA	NA	NA	NA	NA	NA	NA	NA	NA	NA	NA
ENSMUSG00000052419	2610001J05Rik	none	107.78	-0.231627	0.384779	0.7411	108.819	0.00155739	0.994059	0.998738	130.31	-0.196485	0.325683	0.943961	257.416	0.128682	0.426381	0.666631	103.376	0.873418	0.014166	0.091963	TRUE	0.1088	0.4161	0.9999	TRUE	0.1263	0.3131	0.5028
ENSMUSG00000031242	2610002M06Rik	none	456.189	-0.41893	0.00860053	0.126754	614.532	-0.00305869	0.983973	0.995927	357.118	0.0727855	0.631529	0.991361	258.05	-0.0997887	0.539716	0.754887	49.4629	0.500478	0.328015	0.659993	TRUE	0.05203	0.5984	0.9999	TRUE	-0.3132	0.001132	0.005824
ENSMUSG00000060301	2610008E11Rik	none	85.2807	-0.327105	0.286778	NA	196.584	0.619514	0.00090721	0.032117	56.2495	0.585711	0.0324213	0.523358	50.2517	0.367618	0.178548	0.404724	27.9897	-0.33424	0.605735	0.849393	TRUE	-0.05981	0.6095	0.9999	TRUE	0.02826	0.8008	0.8894
ENSMUSG00000091474	2610021A01Rik	none	103.957	-0.0443452	0.872217	0.967297	174.902	0.195368	0.256158	0.723763	79.9181	-0.118548	0.601423	0.98859	50.8728	-0.367029	0.181943	0.409493	28.0226	-0.396283	0.516635	0.8027	NA	NA	NA	NA	NA	NA	NA	NA
ENSMUSG00000087259	2610035D17Rik	none	45.4618	-0.0406476	0.920303	NA	21.6217	0.406476	0.382176	0.818962	17.0544	-0.197081	0.656285	0.991361	38.4669	-0.20479	0.493297	0.722044	NA	NA	NA	NA	TRUE	0.3858	0.02246	0.5214	TRUE	-0.1717	0.2244	0.4001
ENSMUSG00000071302	2610044O15Rik8	none	80.3125	-0.904741	0.00657626	NA	116.45	-0.27849	0.201859	0.671809	105.979	-0.0963426	0.686335	0.991399	64.0051	-0.339952	0.237861	0.480638	19.096	-0.447329	0.542629	0.819513	NA	NA	NA	NA	NA	NA	NA	NA
ENSMUSG00000059482	2610301B20Rik	none	238.814	-0.0587615	0.758235	0.934093	260.282	0.108848	0.515749	0.881738	167.562	0.235132	0.190611	0.871485	232.199	0.337805	0.049383	0.176336	32.3369	0.531554	0.350155	0.682631	TRUE	0.1045	0.3422	0.9999	TRUE	-0.1119	0.2951	0.4815
ENSMUSG00000100164	2610306M01Rik	none	12.8723	-0.237988	0.742273	NA	18.5873	-0.105239	0.834319	0.971467	5.13421	-0.574645	0.485826	0.973887	28.1266	-0.268791	0.460018	0.696196	5.27421	-0.322118	0.818969	0.943265	TRUE	-0.06738	0.7952	0.9999	TRUE	-0.2303	0.3169	0.5068
ENSMUSG00000097040	2610316D01Rik	none	35.8552	-0.996647	0.0253714	NA	9.99956	-0.22638	0.718918	NA	15.1827	0.358403	0.442628	0.964948	28.4784	0.148642	0.679557	0.844527	NA	NA	NA	NA	TRUE	-0.1696	0.6098	0.9999	TRUE	-0.1239	0.6719	0.8078
ENSMUSG00000010277	2610507B11Rik	none	422.788	0.297076	0.0728752	0.375883	580.926	0.463002	0.000739801	0.0289351	300.943	-0.0183263	0.904712	0.994132	1276.01	0.391264	0.0265524	0.11421	156.573	-0.550977	0.0677667	0.272875	TRUE	-0.003484	0.9744	0.9999	TRUE	-0.0746	0.5111	0.6878
ENSMUSG00000085882	2610507I01Rik	none	20.241	-0.281103	0.630157	NA	14.8712	-0.385257	0.461121	0.861572	14.3485	0.400214	0.408355	0.958839	28.7826	-0.384159	0.259496	0.506732	10.2012	0.247943	0.79864	0.93488	TRUE	-0.01184	0.9291	0.9999	TRUE	-0.226	0.07057	0.1712
ENSMUSG00000086328	2700033N17Rik	none	4.48206	-1.2044	0.348557	NA	NA	NA	NA	NA	NA	NA	NA	NA	3.61651	-0.669213	0.463348	0.698864	NA	NA	NA	NA	NA	NA	NA	NA	NA	NA	NA	NA
ENSMUSG00000034601	2700049A03Rik	none	56.7285	0.555234	0.140234	NA	74.1667	0.350341	0.163363	0.621169	97.5521	0.0262502	0.901071	0.994132	42.5797	-0.571836	0.0727013	0.228715	23.1327	0.0706013	0.912795	0.979448	TRUE	0.1694	0.371	0.9999	TRUE	-0.0272	0.8479	0.9189
ENSMUSG00000024273	2700062C07Rik	none	54.0439	-0.91396	0.0159735	NA	59.702	0.173152	0.534886	0.89153	23.4684	0.233393	0.557895	0.980439	36.6576	0.295906	0.362418	0.609336	15.5136	1.10178	0.17833	0.491336	TRUE	0.04071	0.8135	0.9999	TRUE	-0.1154	0.4181	0.6055
ENSMUSG00000053080	2700081O15Rik	none	41.7565	0.386872	0.348377	NA	63.5487	-0.0658095	0.812133	0.968549	5.93686	-0.179773	0.805212	0.994132	17.3878	-0.335263	0.449803	0.686934	NA	NA	NA	NA	TRUE	0.09549	0.3373	0.9999	TRUE	-0.1671	0.1013	0.2245
ENSMUSG00000062198	2700097O09Rik	none	22.0684	-0.598833	0.306533	NA	27.4501	0.17362	0.674556	0.935363	16.3904	-0.006179	0.98896	0.997356	31.7791	-0.510117	0.12049	0.318244	8.19435	-1.26156	0.229868	0.555852	TRUE	0.1089	0.6708	0.9999	TRUE	-0.1808	0.4388	0.6244
ENSMUSG00000087497	2810001G20Rik	none	19.6769	0.476701	0.428694	NA	17.8581	-0.356777	0.48999	0.874378	23.9624	-0.235272	0.531283	0.979024	29.0591	-0.0258108	0.940912	0.97856	NA	NA	NA	NA	TRUE	0.1058	0.6418	0.9999	TRUE	0.1341	0.5178	0.6922
ENSMUSG00000045464	2810002D19Rik	none	8.2446	0.182502	0.840258	NA	11.7584	-0.348492	0.58073	NA	14.2218	-0.0766413	0.875952	0.994132	22.7684	-0.815412	0.0405325	0.154263	7.1243	0.860371	0.466122	0.771627	TRUE	0.2598	0.2977	0.9999	TRUE	-0.3533	0.1353	0.2775
ENSMUSG00000031984	2810004N23Rik	none	41.747	0.0126443	0.976197	NA	39.6294	-0.0714223	0.827257	0.970437	27.665	-0.199848	0.569087	0.983133	114.09	0.0380354	0.855815	0.939041	35.1644	0.595948	0.280368	0.612235	TRUE	0.149	0.422	0.9999	TRUE	-0.1355	0.3682	0.558
ENSMUSG00000047635	2810006K23Rik	none	41.5221	-0.476455	0.275773	NA	64.5511	-0.0662148	0.809488	0.968105	33.7701	-0.604495	0.0667203	0.673697	55.2932	-0.321513	0.256905	0.503753	38.5188	-0.272681	0.596155	0.844253	TRUE	0.2684	0.1166	0.9165	TRUE	-0.3497	0.03326	0.09658
ENSMUSG00000099881	2810013P06Rik	none	9.62438	0.865719	0.320344	NA	10.1793	0.364364	0.553065	NA	8.16523	0.108014	0.864541	0.994132	22.1162	-0.518273	0.176252	0.402072	NA	NA	NA	NA	TRUE	0.0894	0.5333	0.9999	TRUE	-0.1468	0.2804	0.465
ENSMUSG00000020491	2810021J22Rik	none	29.9438	-0.329021	0.494238	NA	35.5972	-0.403947	0.234991	0.704777	22.6816	-0.314004	0.419543	0.960151	24.1211	-0.0966683	0.797024	0.910294	6.65926	-0.0449715	0.968882	0.991725	TRUE	0.0003023	0.9986	0.9999	TRUE	-0.05678	0.7028	0.8288
ENSMUSG00000049881	2810025M15Rik	none	24.7226	0.357929	0.505286	NA	43.0914	0.497723	0.143613	0.585974	30.5957	0.285345	0.39793	0.957654	27.8507	0.361381	0.343626	0.59238	53.1494	-0.288257	0.517834	0.803759	TRUE	0.04728	0.7904	0.9999	TRUE	0.1035	0.5972	0.7545
ENSMUSG00000096995	2810029C07Rik	none	30.5082	-0.0736402	0.879224	NA	19.9602	0.072812	0.870702	0.9775	10.4044	0.206444	0.711619	0.992723	11.6391	0.197076	0.714111	0.865177	NA	NA	NA	NA	TRUE	-0.2157	0.19	0.9878	TRUE	-0.03887	0.7903	0.8831
ENSMUSG00000037735	2810032G03Rik	none	12.2399	0.194915	0.793894	NA	9.41523	-0.256144	0.691529	NA	NA	NA	NA	NA	25.0693	-1.18771	0.00206353	0.0158042	NA	NA	NA	NA	TRUE	-0.1654	0.4607	0.9999	TRUE	-0.6047	0.005817	0.02367
ENSMUSG00000099034	2810039B14Rik	none	NA	NA	NA	NA	NA	NA	NA	NA	4.82008	0.395574	0.657574	0.991361	9.61144	0.287533	0.610075	0.802195	NA	NA	NA	NA	NA	NA	NA	NA	NA	NA	NA	NA
ENSMUSG00000100891	2810049E08Rik	none	5.66831	0.194458	0.860298	NA	4.01531	0.144323	0.882124	NA	NA	NA	NA	NA	6.9153	0.305394	0.661236	0.834053	NA	NA	NA	NA	TRUE	-0.52	0.03879	0.6557	TRUE	0.6547	0.005298	0.02192
ENSMUSG00000099966	2810402E24Rik	none	NA	NA	NA	NA	NA	NA	NA	NA	NA	NA	NA	NA	6.26532	-0.171852	0.810798	0.917701	NA	NA	NA	NA	NA	NA	NA	NA	NA	NA	NA	NA
ENSMUSG00000086629	2810403D21Rik	none	7.10718	1.13395	0.265489	NA	9.03566	0.146012	0.828708	NA	6.11966	0.426042	0.58128	0.983491	24.634	0.713194	0.0669039	0.215238	6.76374	1.31018	0.283321	0.616051	TRUE	-0.3555	0.4604	0.9999	TRUE	1.397	4.649e-05	0.0003439
ENSMUSG00000100594	2810414N06Rik	none	5.26962	1.55022	0.199091	NA	NA	NA	NA	NA	4.89077	-0.446666	0.576766	0.983338	11.4116	-0.109431	0.832249	0.927348	5.01915	-0.928386	0.4806	0.779929	NA	NA	NA	NA	NA	NA	NA	NA
ENSMUSG00000097709	2810429I04Rik	none	7.3009	0.464926	0.650568	NA	NA	NA	NA	NA	9.94202	-0.168676	0.764447	0.994132	5.83624	1.06879	0.174937	0.40048	NA	NA	NA	NA	TRUE	-0.2884	0.4753	0.9999	TRUE	-0.00833	0.9824	0.9917
ENSMUSG00000026227	2810459M11Rik	none	9.03206	-0.102844	0.904917	NA	NA	NA	NA	NA	NA	NA	NA	NA	101.805	0.718559	0.00101696	0.00888504	NA	NA	NA	NA	TRUE	0.01243	0.9465	0.9999	TRUE	1.337	6.468e-23	2.461e-21
ENSMUSG00000102014	2900009J06Rik	none	8.08897	-0.157218	0.866238	NA	11.4482	-0.211694	0.712119	NA	6.50677	0.160598	0.818757	0.994132	4.9703	0.422314	0.585815	0.786893	NA	NA	NA	NA	TRUE	-0.3178	0.55	0.9999	TRUE	-0.7302	0.09993	0.2222
ENSMUSG00000051339	2900026A02Rik	none	129.644	0.639489	0.0100452	0.134782	243.8	0.0319362	0.83822	0.9721	11.9592	-0.00985684	0.984902	0.997323	34.334	0.204869	0.527895	0.746245	11.4475	-0.092106	0.918362	0.980441	TRUE	0.01967	0.8359	0.9999	TRUE	-0.2601	0.005683	0.02324
ENSMUSG00000054418	2900041M22Rik	none	NA	NA	NA	NA	7.49772	0.247957	0.727362	NA	NA	NA	NA	NA	NA	NA	NA	NA	NA	NA	NA	NA	TRUE	0.3758	0.3302	0.9999	TRUE	0.1472	0.6503	0.7919
ENSMUSG00000099696	2900052N01Rik	none	8.58496	0.0096902	0.991385	NA	NA	NA	NA	NA	NA	NA	NA	NA	528.753	-0.497485	0.00969793	0.0546145	NA	NA	NA	NA	TRUE	-0.06205	0.6454	0.9999	TRUE	-0.1623	0.1315	0.2718
ENSMUSG00000071860	2900055J20Rik	none	41.5425	-0.194243	0.635783	NA	40.2523	0.160018	0.637491	0.926634	5.08353	-0.0855954	0.914673	0.994132	12.4001	0.532721	0.293427	0.544642	NA	NA	NA	NA	TRUE	-0.2323	0.4785	0.9999	TRUE	-0.1366	0.6535	0.7949
ENSMUSG00000113621	2900060N12Rik	none	NA	NA	NA	NA	5.12154	-0.289847	0.748108	NA	NA	NA	NA	NA	6.67646	-0.231526	0.73803	0.879548	NA	NA	NA	NA	NA	NA	NA	NA	NA	NA	NA	NA
ENSMUSG00000097277	2900076A07Rik	none	8.61355	-0.73743	0.409603	NA	9.4247	-0.339842	0.593721	NA	5.99323	-0.530167	0.470245	0.971512	15.5282	-0.276061	0.535931	0.752198	NA	NA	NA	NA	TRUE	-0.05704	0.7815	0.9999	TRUE	-0.03008	0.8976	0.9477
ENSMUSG00000087038	2900079G21Rik	none	21.7672	0.295635	0.604652	NA	16.2885	-0.286645	0.588615	0.909682	4.52306	0.539457	0.51842	0.977956	10.3775	-0.247716	0.648065	0.8265	NA	NA	NA	NA	TRUE	-0.2326	0.4259	0.9999	TRUE	-0.1933	0.4489	0.6333
ENSMUSG00000102869	2900097C17Rik	none	NA	NA	NA	NA	NA	NA	NA	NA	NA	NA	NA	NA	6.51067	-0.00105048	0.99881	0.99958	10.6855	-2.33913	0.021856	0.124761	TRUE	-0.03116	0.8199	0.9999	TRUE	-0.2414	0.0777	0.1846
ENSMUSG00000070282	3000002C10Rik	none	9.8489	-0.242959	0.773148	NA	14.7498	-0.39915	0.451018	0.856494	7.52454	0.678781	0.301648	0.939405	4.12407	-0.212804	0.820162	0.921786	NA	NA	NA	NA	TRUE	-0.3052	0.1916	0.9878	TRUE	0.04678	0.8264	0.905
ENSMUSG00000084885	3010001F23Rik	none	NA	NA	NA	NA	NA	NA	NA	NA	NA	NA	NA	NA	NA	NA	NA	NA	NA	NA	NA	NA	TRUE	0.1782	0.6671	0.9999	TRUE	0.01958	0.9528	0.978
ENSMUSG00000079737	3110001I22Rik	none	12.8815	-0.447044	0.538619	NA	15.3556	0.154712	0.756769	0.955153	12.866	-0.392613	0.467835	0.970661	11.2295	-0.469355	0.395972	0.640646	9.40472	0.23077	0.81832	0.942858	TRUE	0.4218	0.1727	0.9803	TRUE	-0.08998	0.7504	0.859
ENSMUSG00000026388	3110009E18Rik	none	12.4249	-0.661034	0.370747	NA	30.0859	-0.00101155	0.997856	0.999248	10.7577	0.0848172	0.875063	0.994132	29.4523	-0.17325	0.64386	0.824271	8.71554	-0.0200036	0.984382	0.9949	TRUE	-0.06001	0.9047	0.9999	TRUE	-0.5446	0.1531	0.3033
ENSMUSG00000104861	3110039M20Rik	none	46.8606	-0.691383	0.0804833	NA	54.2242	0.0188774	0.949727	0.991234	10.1914	0.14108	0.802844	0.994132	21.0657	0.378389	0.337638	0.587103	NA	NA	NA	NA	TRUE	-0.1606	0.5778	0.9999	TRUE	-0.1161	0.6312	0.7788
ENSMUSG00000025102	3110040N11Rik	none	30.9938	0.665814	0.187682	NA	41.716	0.0276499	0.928968	0.987768	18.9784	-0.436771	0.31331	0.939405	27.3941	0.223632	0.567886	0.774543	17.4244	-0.0336038	0.963806	0.990939	TRUE	-0.1375	0.5294	0.9999	TRUE	0.2235	0.2484	0.4281
ENSMUSG00000097503	3110045C21Rik	none	6.55309	-1.22682	0.237492	NA	5.76749	-0.675717	0.403121	NA	NA	NA	NA	NA	10.4664	-1.54699	0.00878073	0.050648	NA	NA	NA	NA	TRUE	0.5026	0.2709	0.9999	TRUE	-0.1117	0.8264	0.905
ENSMUSG00000085642	3110053B16Rik	none	NA	NA	NA	NA	NA	NA	NA	NA	NA	NA	NA	NA	NA	NA	NA	NA	NA	NA	NA	NA	NA	NA	NA	NA	NA	NA	NA	NA
ENSMUSG00000085622	3110056K07Rik	none	18.4616	-1.1468	0.0828714	NA	16.7718	-0.296375	0.540008	0.891674	20.0992	-0.417814	0.350739	0.9512	53.6195	-0.429998	0.136803	0.344262	14.7958	-0.0488676	0.953896	0.988181	TRUE	0.03715	0.8588	0.9999	TRUE	-0.06868	0.7228	0.842
ENSMUSG00000053553	3110082I17Rik	none	20.7278	0.616177	0.29311	NA	14.1303	0.211372	0.697136	0.941362	NA	NA	NA	NA	25.0304	0.530386	0.162834	0.382739	27.0937	2.15724	0.00148959	0.0170551	TRUE	-0.2467	0.2683	0.9999	TRUE	0.2933	0.08911	0.2042
ENSMUSG00000063364	3300002I08Rik	none	10.0622	-0.108512	0.895345	NA	10.082	-0.235542	0.723311	NA	5.23285	-0.111746	0.883833	0.994132	26.9654	0.205648	0.564955	0.77208	5.22754	-0.0027021	0.998339	0.999355	TRUE	-0.02238	0.9636	0.9999	TRUE	0.1727	0.6242	0.7741
ENSMUSG00000033111	3830406C13Rik	none	6.55296	-1.41434	0.184511	NA	6.01815	-1.63611	0.0486428	NA	6.44407	0.254976	0.724119	0.993823	20.0708	-0.184267	0.644424	0.824395	4.63947	0.93549	0.521987	0.806319	TRUE	0.0263	0.8467	0.9999	TRUE	-0.05593	0.6353	0.7817
ENSMUSG00000064202	4430402I18Rik	none	8.39039	0.863477	0.347478	NA	7.01352	0.665469	0.432469	NA	6.60125	-0.0751473	0.91405	0.994132	13.0057	0.572349	0.257331	0.50396	NA	NA	NA	NA	TRUE	-0.2295	0.3591	0.9999	TRUE	0.1388	0.5214	0.695
ENSMUSG00000042579	4632404H12Rik	none	10.5586	-0.257374	0.748782	NA	13.6197	0.371995	0.496131	0.875807	13.3905	-0.27089	0.580799	0.983491	14.8512	0.0736515	0.874142	0.9482	NA	NA	NA	NA	NA	NA	NA	NA	NA	NA	NA	NA
ENSMUSG00000048106	4632415L05Rik	none	26.9206	-0.149355	0.76838	NA	12.6669	-0.179188	0.752608	0.953714	32.7265	-0.271193	0.405361	0.958839	50.9582	0.21395	0.450286	0.68715	11.5347	-0.267734	0.767849	0.924853	TRUE	-0.05823	0.6364	0.9999	TRUE	0.04276	0.7107	0.834
ENSMUSG00000097762	4732463B04Rik	none	4.44336	0.51374	0.684899	NA	NA	NA	NA	NA	NA	NA	NA	NA	NA	NA	NA	NA	NA	NA	NA	NA	NA	NA	NA	NA	NA	NA	NA	NA
ENSMUSG00000053714	4732471J01Rik	none	31.7625	0.160916	0.731157	NA	16.0115	-0.0681507	0.895666	0.981412	9.0729	-0.347209	0.556986	0.980439	13.9184	-0.161515	0.739058	0.880333	NA	NA	NA	NA	TRUE	-0.2962	0.2921	0.9999	TRUE	0.1076	0.668	0.8049
ENSMUSG00000097350	4732491K20Rik	none	10.325	0.133627	0.868964	NA	5.23847	0.11675	0.897192	NA	17.2029	0.244977	0.578529	0.983338	11.8806	-0.0261411	0.959437	0.984477	NA	NA	NA	NA	TRUE	-0.3122	0.2443	0.9999	TRUE	0.3077	0.2082	0.3799
ENSMUSG00000097697	4833412C05Rik	none	5.2886	0.687401	0.547286	NA	NA	NA	NA	NA	NA	NA	NA	NA	2.51673	2.58566	0.0640476	0.208958	NA	NA	NA	NA	NA	NA	NA	NA	NA	NA	NA	NA
ENSMUSG00000062822	4833420G17Rik	none	167.366	-0.172788	0.432042	0.770139	193.435	0.0408255	0.806588	0.967964	76.8412	0.343013	0.177185	0.858494	65.4626	-0.105083	0.69605	0.854412	38.9243	0.359393	0.486451	0.785498	TRUE	-0.1375	0.1928	0.9878	TRUE	0.1645	0.1297	0.2692
ENSMUSG00000074782	4833422C13Rik	none	7.21387	-0.0618299	0.948835	NA	15.2696	0.205916	0.708551	0.943861	NA	NA	NA	NA	7.48025	0.608995	0.344755	0.593283	NA	NA	NA	NA	TRUE	-0.2629	0.233	0.9954	TRUE	-0.06356	0.7812	0.8784
ENSMUSG00000025871	4833439L19Rik	none	149.097	0.147012	0.535656	0.830602	139.985	0.0420327	0.828782	0.970437	133.574	-0.0548964	0.786643	0.994132	331.671	0.282892	0.125762	0.326935	102.621	0.710354	0.0743868	0.288449	TRUE	0.05966	0.4933	0.9999	TRUE	0.02992	0.7341	0.8491
ENSMUSG00000103103	4833445I07Rik	none	6.66966	0.317746	0.753617	NA	6.38646	0.0415486	0.957666	NA	NA	NA	NA	NA	NA	NA	NA	NA	NA	NA	NA	NA	NA	NA	NA	NA	NA	NA	NA	NA
ENSMUSG00000097626	4921504A21Rik	none	4.9682	-0.169513	0.885605	NA	12.7148	-0.108874	0.846074	0.974537	19.3318	0.0179204	0.969083	0.997323	11.4654	0.530537	0.34485	0.593283	NA	NA	NA	NA	NA	NA	NA	NA	NA	NA	NA	NA
ENSMUSG00000036934	4921524J17Rik	none	42.0291	-0.377677	0.366723	NA	78.0243	0.145601	0.559672	0.899594	43.7562	-0.233937	0.437289	0.964767	23.1681	-0.681452	0.0814344	0.246932	9.54288	0.283162	0.77685	0.928527	TRUE	0.1461	0.4898	0.9999	TRUE	-0.1563	0.4243	0.6114
ENSMUSG00000104586	4921539H07Rik	none	4.78329	-1.36579	0.26347	NA	42.3505	0.152459	0.682503	0.935461	NA	NA	NA	NA	NA	NA	NA	NA	NA	NA	NA	NA	NA	NA	NA	NA	NA	NA	NA	NA
ENSMUSG00000027309	4930402H24Rik	none	215.973	0.0265981	0.9107	0.978261	234.553	0.291043	0.0614175	0.412211	101.383	0.0969047	0.638917	0.991361	727.183	-0.259886	0.114486	0.308202	66.0504	-1.89319	4.79705e-05	0.000964182	TRUE	0.08855	0.307	0.9999	TRUE	-0.09603	0.2889	0.4743
ENSMUSG00000046567	4930430F08Rik	none	152.163	-0.0345684	0.890753	0.97424	256.394	0.0248965	0.864131	0.977112	124.372	0.141661	0.479336	0.973802	136.257	-0.217682	0.301047	0.552635	26.6078	0.0924731	0.879916	0.968917	TRUE	0.1132	0.4355	0.9999	TRUE	0.2371	0.06487	0.1609
ENSMUSG00000008129	4930432K21Rik	none	29.1173	-0.0123131	0.979986	NA	23.9783	-0.349935	0.414244	0.837222	10.8508	0.111115	0.836718	0.994132	5.92354	0.464648	0.528423	0.746686	NA	NA	NA	NA	TRUE	0.01365	0.9625	0.9999	TRUE	-0.3027	0.2559	0.4373
ENSMUSG00000021098	4930447C04Rik	none	NA	NA	NA	NA	NA	NA	NA	NA	10.0781	0.562827	0.325162	0.943961	NA	NA	NA	NA	NA	NA	NA	NA	TRUE	-0.1099	0.6111	0.9999	TRUE	-0.1558	0.3973	0.5852
ENSMUSG00000087674	4930447M23Rik	none	49.6108	-0.0863656	0.823095	NA	34.3979	-0.21708	0.526069	0.886872	3.79478	-0.427188	0.641846	0.991361	20.9808	-0.243757	0.544786	0.75788	NA	NA	NA	NA	NA	NA	NA	NA	NA	NA	NA	NA
ENSMUSG00000106583	4930447N08Rik	none	5.58028	-0.937093	0.404986	NA	6.01943	-0.195887	0.806386	NA	NA	NA	NA	NA	NA	NA	NA	NA	NA	NA	NA	NA	NA	NA	NA	NA	NA	NA	NA	NA
ENSMUSG00000082843	4930448K20Rik	none	NA	NA	NA	NA	7.35826	-0.192701	0.814674	NA	3.92671	1.34446	0.151787	0.834673	NA	NA	NA	NA	NA	NA	NA	NA	NA	NA	NA	NA	NA	NA	NA	NA
ENSMUSG00000021747	4930452B06Rik	none	45.7906	0.229284	0.562772	NA	25.2313	0.291475	0.465824	0.862086	28.6271	0.172369	0.624102	0.990737	17.9042	0.156167	0.72151	0.869146	NA	NA	NA	NA	TRUE	-0.02761	0.8829	0.9999	TRUE	-0.273	0.1138	0.2447
ENSMUSG00000059920	4930453N24Rik	none	71.1267	-0.320707	0.316968	NA	78.0961	-0.33492	0.163566	0.621504	55.203	-0.0584203	0.844983	0.994132	54.8835	-0.148175	0.567478	0.774232	27.9436	-0.418271	0.51845	0.804296	TRUE	0.001033	0.9951	0.9999	TRUE	-0.1643	0.243	0.4221
ENSMUSG00000087611	4930458D05Rik	none	4.69592	-1.33829	0.275439	NA	NA	NA	NA	NA	7.00865	-0.379061	0.597773	0.988481	2.73151	2.71905	0.0416682	0.157195	NA	NA	NA	NA	NA	NA	NA	NA	NA	NA	NA	NA
ENSMUSG00000097284	4930480K23Rik	none	6.41629	-0.189212	0.854881	NA	6.0631	0.519875	0.524707	NA	6.15101	0.343228	0.625728	0.991179	13.1764	-0.30675	0.538621	0.754525	NA	NA	NA	NA	NA	NA	NA	NA	NA	NA	NA	NA
ENSMUSG00000086938	4930481A15Rik	none	5.59021	0.532476	0.628554	NA	NA	NA	NA	NA	NA	NA	NA	NA	14.3126	-0.227175	0.644571	0.824395	9.07109	-0.849799	0.395034	0.715512	TRUE	-0.164	0.5883	0.9999	TRUE	0.0347	0.9115	0.9552
ENSMUSG00000044906	4930503L19Rik	none	19.2397	-0.573793	0.346723	NA	31.3344	0.214292	0.556299	0.899293	16.6766	-0.394388	0.3819	0.957654	32.7702	0.454131	0.163257	0.383193	10.4012	0.0596779	0.949944	0.987552	TRUE	0.05326	0.7595	0.9999	TRUE	0.362	0.01499	0.05106
ENSMUSG00000072762	4930522L14Rik	none	5.3377	0.214617	0.848946	NA	3.90554	0.558296	0.574963	NA	10.2338	-0.898087	0.145854	0.825377	10.9283	0.126786	0.815981	0.920516	7.8073	-0.298612	0.782322	0.929638	NA	NA	NA	NA	NA	NA	NA	NA
ENSMUSG00000097276	4930525G20Rik	none	10.6938	-1.42285	0.0986962	NA	9.1752	0.70267	0.297024	NA	NA	NA	NA	NA	4.76477	0.585853	0.469831	0.705655	NA	NA	NA	NA	TRUE	0.1252	0.7027	0.9999	TRUE	-0.1725	0.5692	0.7334
ENSMUSG00000085521	4930526A20Rik	none	NA	NA	NA	NA	NA	NA	NA	NA	NA	NA	NA	NA	NA	NA	NA	NA	NA	NA	NA	NA	NA	NA	NA	NA	NA	NA	NA	NA
ENSMUSG00000048905	4930539E08Rik	none	20.1545	0.297593	0.614436	NA	9.5469	-0.46442	0.507805	NA	NA	NA	NA	NA	7.50375	0.219065	0.742787	0.883006	NA	NA	NA	NA	TRUE	-0.2574	0.3751	0.9999	TRUE	-0.5559	0.02159	0.06857
ENSMUSG00000097890	4930547M16Rik	none	NA	NA	NA	NA	NA	NA	NA	NA	NA	NA	NA	NA	NA	NA	NA	NA	NA	NA	NA	NA	NA	NA	NA	NA	NA	NA	NA	NA
ENSMUSG00000106791	4930553P18Rik	none	NA	NA	NA	NA	NA	NA	NA	NA	3.49641	0.413767	0.685743	0.991399	NA	NA	NA	NA	NA	NA	NA	NA	NA	NA	NA	NA	NA	NA	NA	NA
ENSMUSG00000053574	4930563E22Rik	none	NA	NA	NA	NA	NA	NA	NA	NA	2.95095	-2.33424	0.0511975	0.615202	4.73432	-0.420184	0.609856	0.801981	NA	NA	NA	NA	TRUE	0.04222	0.886	0.9999	TRUE	0.05905	0.8133	0.897
ENSMUSG00000085084	4930570G19Rik	none	7.20404	0.321856	0.748604	NA	5.47026	0.690988	0.419492	NA	4.25694	0.000972216	0.999093	0.999482	16.2662	-0.315566	0.485325	0.715681	NA	NA	NA	NA	TRUE	-0.4706	0.008208	0.3306	TRUE	0.2408	0.1469	0.2947
ENSMUSG00000031938	4931406C07Rik	none	50.1274	0.15102	0.69247	NA	69.5019	0.634075	0.014598	0.190332	28.4487	0.839058	0.0223728	0.461982	384.526	0.592929	8.98643e-05	0.00112634	145.291	-0.190768	0.549153	0.823212	TRUE	-0.1514	0.2875	0.9999	TRUE	0.8748	1.336e-15	3.161e-14
ENSMUSG00000066571	4931406P16Rik	none	44.0319	0.179653	0.655192	NA	40.6018	-0.038028	0.904554	0.982592	25.7902	0.219302	0.546838	0.980148	119.659	0.924881	2.22491e-05	0.000329148	70.2753	0.93073	0.0390819	0.18779	TRUE	0.02799	0.7974	0.9999	TRUE	0.2947	0.004059	0.01749
ENSMUSG00000022179	4931414P19Rik	none	24.8598	-0.06333	0.904323	NA	25.6523	-0.442661	0.265516	0.731893	4.50217	0.0578456	0.944907	0.995591	16.0634	-0.198763	0.660884	0.833755	5.53252	1.40609	0.29593	0.62907	TRUE	-0.06987	0.8054	0.9999	TRUE	0.3827	0.1198	0.2544
ENSMUSG00000014837	4931428F04Rik	none	63.5643	0.370245	0.281985	NA	43.2249	-0.186117	0.539344	0.891674	40.2036	0.1574	0.596304	0.988481	28.758	0.120483	0.728111	0.87415	4.58889	-0.281348	0.840799	0.953894	TRUE	-0.08406	0.4494	0.9999	TRUE	-0.3035	0.006848	0.02714
ENSMUSG00000037270	4932438A13Rik	none	1557.08	0.163531	0.280615	0.668814	1865.28	0.262512	0.0525522	0.380039	1303.23	-0.020374	0.888263	0.994132	1047.55	-0.184356	0.245683	0.489787	280.044	-0.41958	0.142422	0.432187	TRUE	0.06056	0.5304	0.9999	TRUE	-0.04963	0.625	0.7748
ENSMUSG00000097216	4932441J04Rik	none	15.9736	0.224534	0.733985	NA	5.38757	-0.27153	0.743242	NA	4.54853	-0.11225	0.889711	0.994132	8.26323	-0.469599	0.448581	0.686013	NA	NA	NA	NA	TRUE	-0.6166	0.203	0.9917	TRUE	-0.5131	0.3114	0.5011
ENSMUSG00000097908	4933404O12Rik	none	15.7885	0.346122	0.601109	NA	9.77458	-0.120776	0.867916	NA	NA	NA	NA	NA	8.13001	0.0553777	0.929873	0.973588	NA	NA	NA	NA	TRUE	0.0004272	0.9977	0.9999	TRUE	-0.3774	0.005199	0.0216
ENSMUSG00000026224	4933407L21Rik	none	16.5084	-0.352883	0.583899	NA	9.1552	0.238587	0.722739	NA	NA	NA	NA	NA	44.8276	0.20905	0.506817	0.729845	NA	NA	NA	NA	TRUE	-0.1994	0.5228	0.9999	TRUE	0.2458	0.3589	0.5483
ENSMUSG00000112627	4933412E12Rik	none	28.039	-0.302746	0.548045	NA	19.5049	0.22265	0.63261	0.925241	NA	NA	NA	NA	14.3464	0.533554	0.282144	0.531805	9.70127	-0.520445	0.597377	0.844921	TRUE	-0.04344	0.8667	0.9999	TRUE	-0.04504	0.8529	0.9217
ENSMUSG00000113960	4933412O06Rik	none	11.5796	-0.308605	0.693042	NA	22.4243	-0.120057	0.796395	0.965216	NA	NA	NA	NA	7.09216	0.19438	0.769772	0.896668	NA	NA	NA	NA	TRUE	0.07203	0.8221	0.9999	TRUE	-0.3326	0.1966	0.3641
ENSMUSG00000085037	4933421O10Rik	none	12.3081	-0.736943	0.32365	NA	10.2821	-0.301755	0.641298	NA	9.88216	-0.0907046	0.873764	0.994132	13.3941	-0.225607	0.642516	0.823537	5.55442	1.07526	0.417252	0.735685	TRUE	-0.0931	0.601	0.9999	TRUE	0.163	0.2585	0.44
ENSMUSG00000102416	4933424G06Rik	none	NA	NA	NA	NA	NA	NA	NA	NA	NA	NA	NA	NA	4.09839	0.905911	0.303967	0.555081	NA	NA	NA	NA	NA	NA	NA	NA	NA	NA	NA	NA
ENSMUSG00000020807	4933427D14Rik	none	37.4872	0.0748857	0.867522	NA	41.4631	-0.109747	0.734183	0.949433	17.0174	-0.282476	0.520969	0.977956	10.5573	-0.694065	0.20766	0.443006	8.72796	-0.750014	0.469827	0.773983	TRUE	0.01557	0.8829	0.9999	TRUE	-0.04619	0.6611	0.7999
ENSMUSG00000086968	4933431E20Rik	none	158.191	0.175208	0.452463	0.782386	123.18	-0.0725132	0.717805	0.946329	73.5559	-0.139713	0.574746	0.983338	294.152	-0.788032	2.14254e-06	4.06742e-05	11.6655	-0.0176036	0.98469	0.994958	TRUE	-0.05585	0.5345	0.9999	TRUE	-0.5456	1.135e-08	1.461e-07
ENSMUSG00000027942	4933434E20Rik	none	59.3243	0.504053	0.15267	NA	46.5736	-0.156993	0.612621	0.917849	80.774	0.498289	0.0433321	0.577891	192.156	0.0566596	0.770568	0.897131	36.1737	0.278287	0.600362	0.84673	TRUE	-0.01304	0.8983	0.9999	TRUE	0.08687	0.4165	0.6043
ENSMUSG00000072893	4933439C10Rik	none	5.37595	-0.166845	0.885575	NA	NA	NA	NA	NA	NA	NA	NA	NA	4.50739	-0.0353251	0.966515	0.986476	NA	NA	NA	NA	TRUE	-0.1585	0.3059	0.9999	TRUE	-0.008876	0.9529	0.978
ENSMUSG00000073147	5031425E22Rik	none	15.6726	-0.0157983	0.981597	NA	9.67741	-0.221559	0.737489	NA	10.7157	0.590209	0.283179	0.930477	14.3841	0.0306237	0.948798	0.98073	NA	NA	NA	NA	TRUE	-0.1622	0.4111	0.9999	TRUE	0.2762	0.1251	0.2621
ENSMUSG00000036046	5031439G07Rik	none	46.5303	0.0713831	0.855611	NA	47.1412	0.298235	0.333174	0.782584	22.7134	0.134233	0.725302	0.993949	102.447	0.430792	0.0622376	0.204902	57.0345	-0.0221342	0.959461	0.989748	TRUE	-0.02148	0.8211	0.9999	TRUE	0.04232	0.6499	0.7918
ENSMUSG00000038152	5033430I15Rik	none	5.26946	0.462338	0.681493	NA	3.56631	-0.135379	0.899214	NA	NA	NA	NA	NA	NA	NA	NA	NA	NA	NA	NA	NA	NA	NA	NA	NA	NA	NA	NA	NA
ENSMUSG00000086822	5330413P13Rik	none	6.54299	-1.0458	0.311022	NA	5.77865	0.288497	0.721045	NA	NA	NA	NA	NA	5.30603	0.248244	0.751581	0.887475	NA	NA	NA	NA	TRUE	-0.472	0.1546	0.9606	TRUE	0.251	0.3432	0.5324
ENSMUSG00000054944	5330416C01Rik	none	6.99949	-0.758347	0.450048	NA	NA	NA	NA	NA	NA	NA	NA	NA	NA	NA	NA	NA	NA	NA	NA	NA	NA	NA	NA	NA	NA	NA	NA	NA
ENSMUSG00000040412	5330417C22Rik	none	337.472	-0.165142	0.33373	0.704793	302.775	-0.225896	0.103134	0.517485	105.235	-0.119047	0.570411	0.983133	164.273	-0.379062	0.0895929	0.262203	17.7866	-1.72806	0.0250822	0.13764	TRUE	0.0147	0.8951	0.9999	TRUE	-0.172	0.1252	0.2622
ENSMUSG00000087620	5330434G04Rik	none	35.7976	-0.220897	0.620097	NA	33.0241	0.0221124	0.949801	0.991234	40.8204	-0.247742	0.423188	0.962425	25.4921	-0.348495	0.335908	0.58549	NA	NA	NA	NA	TRUE	0.04315	0.8448	0.9999	TRUE	-0.5214	0.01215	0.04315
ENSMUSG00000052291	5330438D12Rik	none	9.65381	-0.090641	0.9157	NA	13.7188	0.0710911	0.895695	0.981412	16.698	-0.534449	0.289453	0.935569	7.54766	0.345194	0.584096	0.785943	NA	NA	NA	NA	NA	NA	NA	NA	NA	NA	NA	NA
ENSMUSG00000072763	5430403G16Rik	none	8.74917	-0.730931	0.433042	NA	13.0685	-0.304567	0.589217	0.909682	6.3744	0.551178	0.447258	0.966257	5.72404	1.35412	0.0821954	0.248554	5.73588	0.507133	0.690698	0.894634	NA	NA	NA	NA	NA	NA	NA	NA
ENSMUSG00000085741	5430405H02Rik	none	19.8723	-0.568145	0.334715	NA	25.996	-0.0222865	0.954517	0.991677	15.129	0.624215	0.194619	0.87545	27.559	0.40799	0.275196	0.523686	4.62262	-0.428593	0.762027	0.922514	TRUE	0.1272	0.6076	0.9999	TRUE	-0.08826	0.7113	0.8345
ENSMUSG00000097772	5430416N02Rik	none	7.14564	0.117737	0.903045	NA	NA	NA	NA	NA	3.82685	-0.421785	0.659414	0.991361	3.57323	2.02792	0.0545737	0.187598	NA	NA	NA	NA	TRUE	-0.5825	0.05289	0.7396	TRUE	-0.01436	0.9552	0.979
ENSMUSG00000087174	5530601H04Rik	none	34.6597	-0.752438	0.102356	NA	28.7313	-0.392676	0.326927	0.774973	34.2069	-0.0780737	0.816672	0.994132	57.8075	0.316851	0.27313	0.520936	12.6659	-0.849658	0.326267	0.657777	TRUE	0.3154	0.07867	0.8374	TRUE	-0.2151	0.2578	0.4392
ENSMUSG00000087424	5730405O15Rik	none	13.8539	0.825789	0.246959	NA	7.32935	-0.71524	0.320764	NA	9.13656	0.501977	0.422863	0.962425	9.69764	0.0371576	0.947676	0.980674	NA	NA	NA	NA	TRUE	0.4107	0.3887	0.9999	TRUE	0.278	0.5053	0.6832
ENSMUSG00000073755	5730409E04Rik	none	293.412	-0.0806477	0.663764	0.895445	234.814	0.0912366	0.593252	0.909682	297.275	-0.0275487	0.851463	0.994132	151.985	0.0695895	0.73259	0.876578	46.1884	-0.0122067	0.980623	0.993629	TRUE	-0.1603	0.08755	0.8544	TRUE	-0.3978	6.679e-06	5.796e-05
ENSMUSG00000057181	5730455P16Rik	none	389.41	0.0421534	0.794748	0.944753	504.648	0.0586396	0.654157	0.931254	351.207	0.199738	0.161165	0.844214	250.874	0.172805	0.315689	0.566107	46.4148	0.496397	0.307873	0.641641	TRUE	-0.08665	0.3764	0.9999	TRUE	-0.005105	0.9544	0.9785
ENSMUSG00000029089	5730480H06Rik	none	46.9474	0.196396	0.616585	NA	49.5017	-0.0357036	0.907559	0.983695	15.6502	-0.322344	0.487021	0.974648	46.6466	0.0486202	0.867894	0.945157	14.0661	0.0885262	0.916681	0.979819	TRUE	0.02252	0.9521	0.9999	TRUE	0.8227	0.004153	0.01783
ENSMUSG00000032985	5730522E02Rik	none	NA	NA	NA	NA	7.32809	0.0517462	0.942913	NA	NA	NA	NA	NA	NA	NA	NA	NA	NA	NA	NA	NA	TRUE	-0.1163	0.714	0.9999	TRUE	-0.1642	0.6025	0.7593
ENSMUSG00000110148	5830408C22Rik	none	NA	NA	NA	NA	NA	NA	NA	NA	NA	NA	NA	NA	NA	NA	NA	NA	NA	NA	NA	NA	NA	NA	NA	NA	NA	NA	NA	NA
ENSMUSG00000115007	5830448L01Rik	none	NA	NA	NA	NA	5.07369	0.264267	0.774133	NA	12.4735	-0.126179	0.809289	0.994132	7.18762	1.12501	0.102843	0.287689	NA	NA	NA	NA	NA	NA	NA	NA	NA	NA	NA	NA
ENSMUSG00000103477	5930409G06Rik	none	NA	NA	NA	NA	NA	NA	NA	NA	NA	NA	NA	NA	NA	NA	NA	NA	NA	NA	NA	NA	NA	NA	NA	NA	NA	NA	NA	NA
ENSMUSG00000106951	5930430L01Rik	none	4.7347	-0.510838	0.664588	NA	9.77082	1.08987	0.11276	NA	4.07011	1.43997	0.114146	0.777081	8.29872	-1.21806	0.0534512	0.185301	NA	NA	NA	NA	NA	NA	NA	NA	NA	NA	NA	NA
ENSMUSG00000114590	5930438M14Rik	none	5.21131	-0.299471	0.796063	NA	NA	NA	NA	NA	NA	NA	NA	NA	NA	NA	NA	NA	NA	NA	NA	NA	NA	NA	NA	NA	NA	NA	NA	NA
ENSMUSG00000022195	6030458C11Rik	none	231.758	0.0473529	0.810323	0.949269	285.135	0.21861	0.128675	0.566898	94.072	-0.0519658	0.812522	0.994132	88.485	0.0741138	0.743694	0.88357	34.8201	0.586603	0.283708	0.616615	TRUE	0.007652	0.9412	0.9999	TRUE	-0.1406	0.1687	0.3258
ENSMUSG00000018451	6330403K07Rik	none	684.593	-0.0254751	0.854552	0.962813	432.022	-0.444613	0.00895782	0.14419	37.6068	0.930399	0.00328221	0.223748	402.276	-0.0996172	0.506883	0.729845	16.5532	-0.306768	0.687335	0.893191	TRUE	0.07631	0.4294	0.9999	TRUE	-0.4627	8.91e-07	8.895e-06
ENSMUSG00000075585	6330403L08Rik	none	22.2545	0.0764675	0.891939	NA	11.46	-0.253073	0.668347	NA	8.31656	-0.132984	0.836945	0.994132	12.5153	-0.267683	0.595638	0.792851	NA	NA	NA	NA	NA	NA	NA	NA	NA	NA	NA	NA
ENSMUSG00000085227	6330418K02Rik	none	12.0457	0.173939	0.821898	NA	4.10892	-0.160824	0.868074	NA	5.41289	0.00411806	0.995578	0.998298	26.3628	0.538074	0.144624	0.356177	6.34301	0.646178	0.607005	0.84942	TRUE	-0.02233	0.9379	0.9999	TRUE	-0.09621	0.7268	0.8443
ENSMUSG00000045327	6330549D23Rik	none	6.66916	0.13819	0.890574	NA	3.69749	-1.44242	0.207056	NA	NA	NA	NA	NA	NA	NA	NA	NA	NA	NA	NA	NA	TRUE	-0.09321	0.8072	0.9999	TRUE	-0.01847	0.9624	0.9826
ENSMUSG00000031824	6430548M08Rik	none	1400.71	0.433516	0.000250409	0.0127087	719.44	0.100714	0.485811	0.871179	895.316	-0.0111424	0.938787	0.995591	283.871	-0.257868	0.131577	0.335488	59.9644	-1.11934	0.0122637	0.0830989	TRUE	-0.1034	0.3419	0.9999	TRUE	-0.1453	0.1978	0.3657
ENSMUSG00000037977	6430571L13Rik	none	17.4707	0.127079	0.838471	NA	5.38811	-0.370884	0.65949	NA	47.616	-0.147913	0.618779	0.98964	11.2208	0.271574	0.608794	0.801322	NA	NA	NA	NA	TRUE	-0.07265	0.8133	0.9999	TRUE	-0.281	0.2724	0.4563
ENSMUSG00000108228	6430584L05Rik	none	9.57654	-0.180271	0.832859	NA	NA	NA	NA	NA	NA	NA	NA	NA	6.62786	0.579641	0.400329	0.644165	NA	NA	NA	NA	NA	NA	NA	NA	NA	NA	NA	NA
ENSMUSG00000079499	6530402F18Rik	none	33.3559	-0.151059	0.744117	NA	18.1714	0.550981	0.268611	0.734629	10.8189	0.506315	0.358381	0.953003	25.4827	0.375338	0.296081	0.547378	4.49005	-0.937947	0.499663	0.794276	TRUE	-0.1644	0.2237	0.9954	TRUE	-0.02522	0.8533	0.922
ENSMUSG00000098097	6530403H02Rik	none	NA	NA	NA	NA	NA	NA	NA	NA	NA	NA	NA	NA	NA	NA	NA	NA	NA	NA	NA	NA	NA	NA	NA	NA	NA	NA	NA	NA
ENSMUSG00000072066	6720489N17Rik	none	NA	NA	NA	NA	NA	NA	NA	NA	9.16415	0.831559	0.162432	0.845149	25.9731	0.234747	0.540811	0.755295	NA	NA	NA	NA	TRUE	0.3082	0.2366	0.9954	TRUE	-0.04457	0.867	0.9305
ENSMUSG00000032680	6820408C15Rik	none	4.97762	1.27852	0.290895	NA	3.40094	1.58474	0.187551	NA	8.61146	0.510297	0.411109	0.958839	9.87756	-0.669619	0.26117	0.508329	NA	NA	NA	NA	TRUE	0.468	0.1048	0.895	TRUE	0.04289	0.8644	0.9293
ENSMUSG00000085058	8030453O22Rik	none	14.4074	-0.277702	0.695985	NA	12.1393	0.344217	0.556212	NA	NA	NA	NA	NA	10.9398	-1.53052	0.00689768	0.0417575	NA	NA	NA	NA	NA	NA	NA	NA	NA	NA	NA	NA
ENSMUSG00000047466	8030462N17Rik	none	422.219	-0.254871	0.150112	0.514407	373.732	-0.17021	0.19897	0.668976	572.609	-0.18869	0.155421	0.836211	305.096	-0.424405	0.00730233	0.0436915	70.5287	0.448992	0.27892	0.610654	TRUE	0.1281	0.309	0.9999	TRUE	-0.1696	0.1863	0.3503
ENSMUSG00000034587	8430429K09Rik	none	20.241	-0.281103	0.630157	NA	18.0211	0.576686	0.264793	0.730525	12.0528	0.0417526	0.935192	0.995591	19.9887	0.0807638	0.842806	0.932307	NA	NA	NA	NA	TRUE	-0.3737	0.09209	0.8677	TRUE	0.1145	0.6439	0.7876
ENSMUSG00000097343	9030407P20Rik	none	6.83469	-1.80688	0.0821018	NA	4.6609	0.712159	0.438835	NA	4.21228	0.188609	0.831902	0.994132	8.49828	0.182779	0.760113	0.892383	NA	NA	NA	NA	NA	NA	NA	NA	NA	NA	NA	NA
ENSMUSG00000030823	9130019O22Rik	none	NA	NA	NA	NA	5.96842	-0.670428	0.416318	NA	NA	NA	NA	NA	NA	NA	NA	NA	3.91317	-0.0692264	0.966197	0.991356	TRUE	-0.1819	0.4866	0.9999	TRUE	0.1201	0.6612	0.7999
ENSMUSG00000062944	9130023H24Rik	none	13.4851	-0.824353	0.258744	NA	5.4642	-0.486776	0.571024	NA	13.9596	0.56042	0.245077	0.912339	20.4406	0.235443	0.555603	0.765337	16.0094	0.087049	0.914536	0.979455	TRUE	0.04352	0.8733	0.9999	TRUE	0.5724	0.01926	0.0625
ENSMUSG00000087022	9130024F11Rik	none	94.6924	-0.471743	0.0980398	NA	28.7322	-0.429341	0.244305	0.712536	NA	NA	NA	NA	25.2736	-0.220229	0.583191	0.785141	NA	NA	NA	NA	TRUE	-0.6692	0.09385	0.8707	TRUE	-0.5342	0.0268	0.08175
ENSMUSG00000101892	9130401M01Rik	none	36.5561	-0.234007	0.607876	NA	55.1701	0.063189	0.820077	0.96924	25.4687	0.191543	0.614681	0.98964	20.0734	-0.129263	0.758612	0.891721	10.8876	0.454623	0.664424	0.881686	TRUE	-0.0387	0.8101	0.9999	TRUE	-0.2145	0.1332	0.2744
ENSMUSG00000097145	9230114K14Rik	none	25.1998	-0.630148	0.233007	NA	23.3422	-0.539871	0.20381	0.673747	40.9269	-0.26985	0.416032	0.958938	61.9221	-0.0946677	0.717636	0.866996	6.75923	0.655171	0.573923	0.832484	TRUE	0.1959	0.5659	0.9999	TRUE	-0.2579	0.4401	0.6255
ENSMUSG00000107879	9330102E08Rik	none	5.87228	-0.5807	0.588391	NA	6.92375	0.355133	0.630239	NA	NA	NA	NA	NA	NA	NA	NA	NA	NA	NA	NA	NA	NA	NA	NA	NA	NA	NA	NA	NA
ENSMUSG00000097842	9330104G04Rik	none	14.4958	0.18172	0.791766	NA	5.43211	1.06075	0.225119	NA	12.2625	-0.132101	0.794341	0.994132	NA	NA	NA	NA	NA	NA	NA	NA	NA	NA	NA	NA	NA	NA	NA	NA
ENSMUSG00000097061	9330151L19Rik	none	8.70108	-0.144427	0.86936	NA	5.79214	0.40627	0.623368	NA	6.2854	1.2263	0.101405	0.758855	4.52042	0.932026	0.262923	0.509955	NA	NA	NA	NA	TRUE	-0.1691	0.2078	0.9954	TRUE	-0.05822	0.6325	0.7799
ENSMUSG00000073154	9330158H04Rik	none	4.56972	0.172113	0.888305	NA	NA	NA	NA	NA	4.54728	-1.33326	0.155839	0.836341	NA	NA	NA	NA	NA	NA	NA	NA	NA	NA	NA	NA	NA	NA	NA	NA
ENSMUSG00000004360	9330159F19Rik	none	9.82855	-0.12477	0.883579	NA	4.26551	0.464263	0.635002	NA	5.29138	0.460243	0.54704	0.980148	86.9484	-0.365661	0.185414	0.414413	4.70297	-3.73129	0.0232271	0.130659	TRUE	0.1802	0.0935	0.8707	TRUE	-0.3474	0.001244	0.006295
ENSMUSG00000109536	9330162G02Rik	none	17.985	-0.383948	0.548601	NA	9.3051	0.479124	0.459644	NA	6.85337	0.274198	0.68923	0.991776	9.04653	-0.143613	0.811337	0.917873	NA	NA	NA	NA	NA	NA	NA	NA	NA	NA	NA	NA
ENSMUSG00000039133	9330171B17Rik	none	5.30824	1.15318	0.319129	NA	NA	NA	NA	NA	NA	NA	NA	NA	NA	NA	NA	NA	NA	NA	NA	NA	NA	NA	NA	NA	NA	NA	NA	NA
ENSMUSG00000097166	9330179D12Rik	none	14.2823	-0.0340547	0.961162	NA	6.56694	-0.605977	0.458401	NA	4.62727	-0.675669	0.429671	0.962425	15.2727	0.849611	0.0698825	0.221797	NA	NA	NA	NA	TRUE	-0.1737	0.6534	0.9999	TRUE	-0.5433	0.06562	0.1624
ENSMUSG00000056004	9330182L06Rik	none	359.844	-0.0965554	0.562624	0.843926	271.208	-0.389311	0.0186093	0.219602	701.685	-0.210961	0.238813	0.908037	301.638	0.122821	0.515865	0.737629	30.0045	-1.39166	0.0238102	0.132987	TRUE	0.1465	0.3458	0.9999	TRUE	-0.3955	0.004908	0.02061
ENSMUSG00000059939	9430015G10Rik	none	31.7042	-0.126584	0.787823	NA	16.7404	0.262546	0.590613	0.909682	19.8263	-0.269644	0.502215	0.977337	23.3767	-0.0873873	0.825746	0.923289	6.51659	-0.732696	0.527963	0.811141	TRUE	0.02245	0.8458	0.9999	TRUE	-0.1371	0.2547	0.436
ENSMUSG00000054457	9430021M05Rik	none	45.4225	0.217622	0.585905	NA	6.91498	-0.651021	0.391019	NA	7.53229	-0.0671694	0.918234	0.994537	18.2797	0.355434	0.437777	0.677622	NA	NA	NA	NA	TRUE	-0.5299	0.04065	0.6714	TRUE	-0.1115	0.7271	0.8446
ENSMUSG00000040139	9430038I01Rik	none	4.47211	0.258395	0.833028	NA	NA	NA	NA	NA	NA	NA	NA	NA	8.02053	0.0405154	0.948526	0.980674	7.07379	1.33476	0.277768	0.609708	TRUE	-0.08216	0.8096	0.9999	TRUE	0.07344	0.8274	0.9054
ENSMUSG00000086155	9430041J12Rik	none	9.4302	0.139271	0.869989	NA	3.82717	0.505644	0.646211	NA	11.2273	-0.202226	0.710669	0.992723	43.3906	0.0232737	0.944183	0.979257	NA	NA	NA	NA	TRUE	-0.01148	0.9656	0.9999	TRUE	0.4046	0.143	0.2887
ENSMUSG00000102344	9430053O09Rik	none	7.33081	-1.24928	0.202072	NA	23.5491	-0.443872	0.298107	0.757972	4.27293	-0.0388131	0.964686	0.997183	13.2843	-0.08863	0.854496	0.938138	NA	NA	NA	NA	NA	NA	NA	NA	NA	NA	NA	NA
ENSMUSG00000097360	9430065F17Rik	none	6.61124	-0.56119	0.582692	NA	7.45677	0.379175	0.600806	NA	8.17883	0.315426	0.620327	0.990183	15.1781	0.138569	0.763763	0.89472	NA	NA	NA	NA	NA	NA	NA	NA	NA	NA	NA	NA
ENSMUSG00000106164	9430085M18Rik	none	17.5688	0.1776	0.786505	NA	6.99322	-1.27014	0.0992939	NA	NA	NA	NA	NA	NA	NA	NA	NA	NA	NA	NA	NA	NA	NA	NA	NA	NA	NA	NA	NA
ENSMUSG00000097462	9530026P05Rik	none	NA	NA	NA	NA	5.04757	0.430381	0.62358	NA	4.5491	0.10191	0.903537	0.994132	26.221	0.832696	0.0220414	0.0999466	NA	NA	NA	NA	TRUE	0.0124	0.9813	0.9999	TRUE	0.1426	0.7068	0.8319
ENSMUSG00000097736	9530059O14Rik	none	NA	NA	NA	NA	NA	NA	NA	NA	NA	NA	NA	NA	NA	NA	NA	NA	NA	NA	NA	NA	NA	NA	NA	NA	NA	NA	NA	NA
ENSMUSG00000036275	9530068E07Rik	none	422.94	-0.0689349	0.660424	0.893988	414.248	0.299789	0.0244	0.254403	599.736	-0.181365	0.222766	0.897824	1237.15	0.521782	0.000415101	0.00413795	513.293	0.457729	0.0502575	0.22104	TRUE	0.06652	0.4817	0.9999	TRUE	0.4073	1.078e-05	9.01e-05
ENSMUSG00000036411	9530077C05Rik	none	70.935	0.10602	0.759339	NA	72.754	0.0827015	0.743926	0.952539	92.1211	-0.392072	0.0991755	0.755029	107.98	-0.193055	0.35661	0.604266	7.66415	-1.0411	0.363784	0.693417	TRUE	0.1446	0.4819	0.9999	TRUE	-0.04358	0.8125	0.8967
ENSMUSG00000044125	9530080O11Rik	none	21.7876	-0.414651	0.459845	NA	31.9451	0.489755	0.171389	0.633345	4.80488	0.250245	0.767759	0.994132	5.95666	-0.594168	0.425913	0.666192	NA	NA	NA	NA	TRUE	0.01819	0.9538	0.9999	TRUE	-0.2414	0.4054	0.594
ENSMUSG00000097825	9630001P10Rik	none	NA	NA	NA	NA	NA	NA	NA	NA	NA	NA	NA	NA	5.19379	-0.769873	0.333637	0.583629	NA	NA	NA	NA	NA	NA	NA	NA	NA	NA	NA	NA
ENSMUSG00000046138	9930021J03Rik	none	84.0977	-0.193372	0.566084	NA	107.832	0.36996	0.0795105	0.468627	84.291	-0.32175	0.156693	0.837782	132.052	-0.00220876	0.991316	0.99566	33.8177	-0.727816	0.205888	0.530069	TRUE	0.1049	0.2636	0.9999	TRUE	-0.2168	0.02628	0.08043
ENSMUSG00000044730	9930104L06Rik	none	41.7871	0.0155274	0.971409	NA	36.6722	-0.16673	0.61114	0.917849	22.4439	0.359218	0.353184	0.9512	33.3371	0.0627334	0.853568	0.937669	12.4411	1.30634	0.158615	0.460433	TRUE	0.06054	0.6574	0.9999	TRUE	0.1177	0.3764	0.5656
ENSMUSG00000110357	A030001D20Rik	none	17.1496	-0.250211	0.690615	NA	17.4773	-1.29654	0.0157342	0.1977	13.7965	-0.446949	0.381459	0.957654	31.1388	0.199889	0.539781	0.754887	NA	NA	NA	NA	NA	NA	NA	NA	NA	NA	NA	NA
ENSMUSG00000079144	A130010J15Rik	none	15.1956	-0.220158	0.750694	NA	17.0952	-0.470803	0.332557	0.782379	8.82436	0.392482	0.510618	0.977729	19.1375	0.357705	0.401916	0.645428	14.4306	-1.02156	0.203357	0.52598	TRUE	-0.008043	0.9686	0.9999	TRUE	0.3136	0.1183	0.252
ENSMUSG00000087306	A230004M16Rik	none	NA	NA	NA	NA	NA	NA	NA	NA	4.54456	0.096829	0.906578	0.994132	NA	NA	NA	NA	NA	NA	NA	NA	NA	NA	NA	NA	NA	NA	NA	NA
ENSMUSG00000068151	A230006K03Rik	none	10.2278	0.204071	0.801477	NA	9.29514	-0.253815	0.691513	NA	4.15159	0.21054	0.8128	0.994132	12.2682	0.507221	0.347806	0.596468	NA	NA	NA	NA	NA	NA	NA	NA	NA	NA	NA	NA
ENSMUSG00000087178	A230056P14Rik	none	7.69017	-1.37463	0.155127	NA	7.66901	0.124371	0.861462	NA	10.9842	-0.254009	0.637962	0.991361	23.5216	-0.812884	0.0386468	0.149599	NA	NA	NA	NA	TRUE	0.5379	0.04768	0.7169	TRUE	-0.3413	0.2002	0.3687
ENSMUSG00000086877	A230072C01Rik	none	24.9957	-0.661063	0.214179	NA	16.9204	0.372812	0.463082	0.861656	16.0101	-0.743286	0.109391	0.770252	31.0284	0.167966	0.625363	0.813175	NA	NA	NA	NA	TRUE	0.1081	0.5593	0.9999	TRUE	-0.3168	0.05043	0.1337
ENSMUSG00000055818	A230083G16Rik	none	NA	NA	NA	NA	NA	NA	NA	NA	5.50144	-1.88767	0.0241275	0.471696	NA	NA	NA	NA	NA	NA	NA	NA	NA	NA	NA	NA	NA	NA	NA	NA
ENSMUSG00000087026	A230103J11Rik	none	25.9579	-0.0208027	0.969466	NA	10.1447	-0.339749	0.594003	NA	11.7494	0.666733	0.214396	0.89112	7.83748	0.545193	0.422193	0.66277	NA	NA	NA	NA	NA	NA	NA	NA	NA	NA	NA	NA
ENSMUSG00000030111	A2m	none	10.2764	3.06204	0.00286641	NA	20.0379	1.31224	0.00884509	0.143227	43.7589	1.51909	5.51787e-07	0.000591516	11125.8	2.25636	3.74591e-42	1.1141e-39	46.6621	1.19959	0.0404164	0.191705	TRUE	0.9507	0.02455	0.5406	TRUE	5.233	1.825e-77	6.994e-75
ENSMUSG00000047228	A2ml1	none	127.253	-0.251128	0.315391	0.692352	110.65	-0.628165	0.0132433	0.180233	71.5586	-0.00310492	0.990094	0.997356	46.5245	0.147878	0.628395	0.815543	NA	NA	NA	NA	NA	NA	NA	NA	NA	NA	NA	NA
ENSMUSG00000052479	A330008L17Rik	none	14.6606	-0.39465	0.564345	NA	24.1992	0.0490293	0.90902	0.983695	5.18596	-0.480566	0.535564	0.979472	3.67039	0.769824	0.405301	0.648316	NA	NA	NA	NA	NA	NA	NA	NA	NA	NA	NA	NA
ENSMUSG00000097915	A330009N23Rik	none	27.942	-0.366834	0.46314	NA	18.0169	0.521982	0.306863	0.761918	NA	NA	NA	NA	8.88624	-0.271464	0.643619	0.824271	NA	NA	NA	NA	TRUE	-0.1477	0.4746	0.9999	TRUE	-0.4558	0.01396	0.04816
ENSMUSG00000096929	A330023F24Rik	none	NA	NA	NA	NA	NA	NA	NA	NA	4.33689	-0.113094	0.891804	0.994132	NA	NA	NA	NA	NA	NA	NA	NA	TRUE	0.3412	0.003232	0.1916	TRUE	-0.2104	0.06738	0.1655
ENSMUSG00000087466	A330041J22Rik	none	NA	NA	NA	NA	NA	NA	NA	NA	NA	NA	NA	NA	9.5014	1.14952	0.0497612	0.177155	NA	NA	NA	NA	TRUE	0.009776	0.9784	0.9999	TRUE	0.1918	0.5479	0.716
ENSMUSG00000097868	A330069E16Rik	none	3.15957	3.28918	0.0826602	NA	NA	NA	NA	NA	3.86158	0.0141345	0.988196	0.997356	5.69464	0.0162804	0.982073	0.991799	NA	NA	NA	NA	TRUE	0.3163	0.5363	0.9999	TRUE	0.2611	0.543	0.712
ENSMUSG00000103181	A330069K06Rik	none	NA	NA	NA	NA	NA	NA	NA	NA	NA	NA	NA	NA	NA	NA	NA	NA	NA	NA	NA	NA	NA	NA	NA	NA	NA	NA	NA	NA
ENSMUSG00000097960	A330074K22Rik	none	4.3264	1.58256	0.230325	NA	NA	NA	NA	NA	33.0851	-0.567102	0.0787622	0.708034	11.5903	-0.348226	0.523026	0.742366	NA	NA	NA	NA	NA	NA	NA	NA	NA	NA	NA	NA
ENSMUSG00000109321	A330076H08Rik	none	6.17331	0.0637122	0.952903	NA	NA	NA	NA	NA	19.8668	0.51484	0.213457	0.890745	4.16628	-0.248746	0.773999	0.899288	NA	NA	NA	NA	TRUE	-0.001228	0.9965	0.9999	TRUE	0.01205	0.9683	0.9854
ENSMUSG00000086363	A330102I10Rik	none	4.4625	0.775296	0.530225	NA	5.45116	0.545603	0.522739	NA	3.54404	-0.976269	0.311328	0.939405	NA	NA	NA	NA	NA	NA	NA	NA	TRUE	0.01316	0.9586	0.9999	TRUE	-0.05679	0.7846	0.8807
ENSMUSG00000047613	A430005L14Rik	none	40.1723	-0.494103	0.240398	NA	51.216	-0.270898	0.360455	0.804452	36.5326	-0.095983	0.766961	0.994132	44.3171	-0.408273	0.170119	0.393389	15.7388	0.190983	0.806269	0.938704	TRUE	0.1334	0.462	0.9999	TRUE	-0.03502	0.8409	0.9143
ENSMUSG00000056014	A430033K04Rik	none	86.8197	-0.126174	0.670434	NA	135.565	0.404236	0.0405773	0.331941	56.2976	0.0653809	0.7987	0.994132	42.9488	0.0785136	0.796516	0.910294	18.65	-0.0877614	0.906233	0.977981	TRUE	0.09638	0.615	0.9999	TRUE	-0.1089	0.4436	0.628
ENSMUSG00000097353	A430046D13Rik	none	30.673	0.255208	0.592794	NA	17.2278	-0.208345	0.665339	0.9346	16.6088	0.127267	0.779595	0.994132	13.315	-0.446779	0.355329	0.603291	6.47112	1.1396	0.368374	0.697038	NA	NA	NA	NA	NA	NA	NA	NA
ENSMUSG00000086851	A430108G06Rik	none	8.97359	0.359389	0.678673	NA	NA	NA	NA	NA	NA	NA	NA	NA	NA	NA	NA	NA	NA	NA	NA	NA	NA	NA	NA	NA	NA	NA	NA	NA
ENSMUSG00000047878	A4galt	none	5.11386	0.763475	0.511092	NA	NA	NA	NA	NA	NA	NA	NA	NA	NA	NA	NA	NA	NA	NA	NA	NA	TRUE	-0.2006	0.4952	0.9999	TRUE	-0.07173	0.7892	0.8829
ENSMUSG00000097322	A530083I20Rik	none	3.23702	-0.288458	0.855671	NA	NA	NA	NA	NA	4.42902	-0.881821	0.301412	0.939405	5.01287	1.14951	0.162536	0.382468	NA	NA	NA	NA	NA	NA	NA	NA	NA	NA	NA	NA
ENSMUSG00000048215	A630023P12Rik	none	5.30843	-0.591802	0.604853	NA	NA	NA	NA	NA	NA	NA	NA	NA	NA	NA	NA	NA	NA	NA	NA	NA	NA	NA	NA	NA	NA	NA	NA	NA
ENSMUSG00000086725	A630052C17Rik	none	NA	NA	NA	NA	NA	NA	NA	NA	NA	NA	NA	NA	4.15291	-0.25595	0.761266	0.893148	NA	NA	NA	NA	NA	NA	NA	NA	NA	NA	NA	NA
ENSMUSG00000101013	A630072M18Rik	none	6.39715	-0.362207	0.72235	NA	7.22906	0.786626	0.287073	NA	4.6959	1.02563	0.231985	0.904897	12.0978	0.123068	0.820473	0.921786	3.82728	-1.10541	0.463496	0.769094	TRUE	0.01265	0.9474	0.9999	TRUE	0.1254	0.4517	0.6361
ENSMUSG00000085566	A730017L22Rik	none	20.6214	0.12416	0.833781	NA	36.9104	0.46044	0.162453	0.619724	10.117	0.1014	0.857347	0.994132	19.3142	-0.881746	0.0375386	0.146943	NA	NA	NA	NA	TRUE	0.046	0.7955	0.9999	TRUE	-0.3373	0.02502	0.07729
ENSMUSG00000097924	A730020E08Rik	none	7.57358	-0.747182	0.427029	NA	8.81152	-0.43141	0.542656	NA	16.6563	-0.156924	0.736157	0.994132	4.89079	-0.527939	0.507034	0.729845	NA	NA	NA	NA	TRUE	0.2019	0.5204	0.9999	TRUE	-0.4036	0.1456	0.2927
ENSMUSG00000097756	A730056A06Rik	none	5.18196	0.33678	0.768734	NA	NA	NA	NA	NA	NA	NA	NA	NA	48.893	-0.642182	0.0212873	0.0975416	NA	NA	NA	NA	TRUE	-0.2351	0.3913	0.9999	TRUE	-0.07843	0.7645	0.8679
ENSMUSG00000092375	A730060N03Rik	none	NA	NA	NA	NA	NA	NA	NA	NA	14.1508	0.448295	0.359339	0.953126	NA	NA	NA	NA	NA	NA	NA	NA	NA	NA	NA	NA	NA	NA	NA	NA
ENSMUSG00000112639	A730063M14Rik	none	NA	NA	NA	NA	NA	NA	NA	NA	NA	NA	NA	NA	31.4601	0.867679	0.0131585	0.0679632	13.2494	1.3461	0.127361	0.402074	NA	NA	NA	NA	NA	NA	NA	NA
ENSMUSG00000086693	A730081D07Rik	none	9.06071	-0.0764086	0.933324	NA	7.20084	-0.361402	0.642546	NA	11.4132	-0.193719	0.72726	0.993949	5.90185	-0.906346	0.207544	0.443006	NA	NA	NA	NA	NA	NA	NA	NA	NA	NA	NA	NA
ENSMUSG00000093598	A730085K08Rik	none	NA	NA	NA	NA	NA	NA	NA	NA	NA	NA	NA	NA	NA	NA	NA	NA	NA	NA	NA	NA	NA	NA	NA	NA	NA	NA	NA	NA
ENSMUSG00000053181	A830005F24Rik	none	5.74558	0.348546	0.748188	NA	6.58472	0.190916	0.805341	NA	9.25998	0.295516	0.637989	0.991361	4.95295	0.559326	0.507377	0.730231	NA	NA	NA	NA	NA	NA	NA	NA	NA	NA	NA	NA
ENSMUSG00000097182	A830009L08Rik	none	15.3705	1.05302	0.124371	NA	NA	NA	NA	NA	NA	NA	NA	NA	7.46705	-0.0120654	0.985575	0.993419	NA	NA	NA	NA	TRUE	-0.532	0.4817	0.9999	TRUE	0.186	0.7945	0.8857
ENSMUSG00000089957	A830011K09Rik	none	4.55982	-0.657625	0.587765	NA	8.15343	1.00923	0.164332	NA	NA	NA	NA	NA	NA	NA	NA	NA	NA	NA	NA	NA	NA	NA	NA	NA	NA	NA	NA	NA
ENSMUSG00000057715	A830018L16Rik	none	790.081	-0.425819	0.00189848	0.0497597	609.855	-0.100721	0.429186	0.845947	178.053	-0.100177	0.576529	0.983338	174.298	-0.482982	0.0508299	0.179616	13.1681	-1.54279	0.0733957	0.28607	TRUE	-0.09767	0.3083	0.9999	TRUE	-0.4929	4.41e-07	4.638e-06
ENSMUSG00000105923	A830019L24Rik	none	8.31181	-0.809914	0.388252	NA	4.10946	-0.126968	0.898492	NA	NA	NA	NA	NA	NA	NA	NA	NA	NA	NA	NA	NA	NA	NA	NA	NA	NA	NA	NA	NA
ENSMUSG00000094707	A830019P07Rik	none	NA	NA	NA	NA	NA	NA	NA	NA	NA	NA	NA	NA	37.865	-0.250264	0.417951	0.659461	NA	NA	NA	NA	NA	NA	NA	NA	NA	NA	NA	NA
ENSMUSG00000103695	A830029E22Rik	none	NA	NA	NA	NA	NA	NA	NA	NA	NA	NA	NA	NA	NA	NA	NA	NA	NA	NA	NA	NA	NA	NA	NA	NA	NA	NA	NA	NA
ENSMUSG00000084890	A830036E02Rik	none	49.4852	0.291169	0.448568	NA	14.1277	-1.0652	0.0686392	0.435398	NA	NA	NA	NA	8.87429	-0.416423	0.481785	0.713684	3.35828	-1.90441	0.255095	0.585948	NA	NA	NA	NA	NA	NA	NA	NA
ENSMUSG00000097413	A830052D11Rik	none	NA	NA	NA	NA	NA	NA	NA	NA	NA	NA	NA	NA	NA	NA	NA	NA	NA	NA	NA	NA	TRUE	-0.64	0.1443	0.9492	TRUE	0.3765	0.2935	0.4797
ENSMUSG00000091890	A830073O21Rik	none	10.2281	0.370956	0.663833	NA	4.86684	1.07489	0.291923	NA	NA	NA	NA	NA	NA	NA	NA	NA	NA	NA	NA	NA	NA	NA	NA	NA	NA	NA	NA	NA
ENSMUSG00000087143	A830082K12Rik	none	28.5726	-0.552285	0.271758	NA	18.4695	-0.521278	0.27631	0.743155	17.0906	-0.202122	0.646154	0.991361	71.5322	-0.256575	0.28366	0.533676	4.60018	-2.57137	0.0817851	0.307216	TRUE	0.04603	0.818	0.9999	TRUE	-0.3257	0.0613	0.1543
ENSMUSG00000074664	A830092H15Rik	none	7.90388	0.333588	0.720872	NA	6.36285	-0.65043	0.40766	NA	NA	NA	NA	NA	NA	NA	NA	NA	NA	NA	NA	NA	NA	NA	NA	NA	NA	NA	NA	NA
ENSMUSG00000114961	A930002C04Rik	none	NA	NA	NA	NA	NA	NA	NA	NA	NA	NA	NA	NA	NA	NA	NA	NA	NA	NA	NA	NA	NA	NA	NA	NA	NA	NA	NA	NA
ENSMUSG00000054057	A930004D18Rik	none	5.04583	0.0714387	0.950255	NA	5.35217	0.465595	0.599527	NA	NA	NA	NA	NA	6.36646	0.908231	0.209392	0.445474	NA	NA	NA	NA	TRUE	0.2256	0.3819	0.9999	TRUE	0.01592	0.9484	0.9752
ENSMUSG00000054426	A930005H10Rik	none	20.6892	0.112096	0.850852	NA	8.93488	1.07215	0.11409	NA	19.2357	0.228993	0.585788	0.985817	81.8416	-0.128362	0.583169	0.785141	6.44971	1.46523	0.27177	0.604107	TRUE	-0.2252	0.3658	0.9999	TRUE	-0.007257	0.9734	0.9878
ENSMUSG00000097610	A930012L18Rik	none	7.36891	0.350755	0.720321	NA	5.88465	-1.43218	0.101541	NA	4.96918	-0.0193367	0.98044	0.997323	6.26949	-0.782341	0.280349	0.53003	NA	NA	NA	NA	TRUE	-0.2164	0.4211	0.9999	TRUE	-0.1541	0.5642	0.7293
ENSMUSG00000092368	A930015D03Rik	none	5.78493	0.173415	0.87257	NA	3.83096	1.09413	0.302615	NA	4.86972	-0.0343973	0.967624	0.997183	8.80585	0.378912	0.540294	0.755077	NA	NA	NA	NA	TRUE	-0.2787	0.4608	0.9999	TRUE	-0.03141	0.9162	0.9577
ENSMUSG00000060530	A930017M01Rik	none	105.457	0.278904	0.313086	0.690716	84.8567	0.0519728	0.827546	0.970437	114.372	-0.0118837	0.955569	0.995891	66.1236	-0.418331	0.105327	0.291801	5.99706	-1.28096	0.293652	0.626853	TRUE	-0.06592	0.6983	0.9999	TRUE	0.102	0.4356	0.6213
ENSMUSG00000097566	A930024N18Rik	none	5.41519	0.285619	0.811859	NA	NA	NA	NA	NA	6.10759	-0.595611	0.403383	0.957669	NA	NA	NA	NA	NA	NA	NA	NA	NA	NA	NA	NA	NA	NA	NA	NA
ENSMUSG00000090622	A930033H14Rik	none	NA	NA	NA	NA	NA	NA	NA	NA	NA	NA	NA	NA	NA	NA	NA	NA	NA	NA	NA	NA	NA	NA	NA	NA	NA	NA	NA	NA
ENSMUSG00000109408	A930037H05Rik	none	14.2716	-0.34816	0.617112	NA	4.58634	0.268933	0.767515	NA	4.93939	-0.909582	0.262765	0.920035	7.83107	-0.103625	0.869004	0.946077	NA	NA	NA	NA	NA	NA	NA	NA	NA	NA	NA	NA
ENSMUSG00000093483	AA465934	none	NA	NA	NA	NA	NA	NA	NA	NA	NA	NA	NA	NA	10.9954	0.112523	0.832589	0.927438	NA	NA	NA	NA	TRUE	0.1034	0.7583	0.9999	TRUE	-0.2172	0.4697	0.6522
ENSMUSG00000033213	AA467197	none	NA	NA	NA	NA	NA	NA	NA	NA	6.27401	1.54022	0.0413422	0.571242	43.3355	3.5175	1.77197e-17	1.2841e-15	NA	NA	NA	NA	FALSE	-0.6308	0.4069	NA	FALSE	1.288	0.05468	NA
ENSMUSG00000042510	AA986860	none	5.02599	0.569485	0.629863	NA	NA	NA	NA	NA	NA	NA	NA	NA	7.10042	0.453636	0.488583	0.718326	NA	NA	NA	NA	TRUE	-0.2498	0.4199	0.9999	TRUE	0.2545	0.3633	0.553
ENSMUSG00000036678	Aaas	none	61.0753	0.234886	0.502755	NA	57.603	0.104718	0.701854	0.942708	64.4066	0.0355765	0.88114	0.994132	39.3235	0.0231491	0.938805	0.977515	18.6488	0.453442	0.544073	0.820006	TRUE	-0.2962	0.04618	0.7083	TRUE	0.1823	0.1355	0.2778
ENSMUSG00000029482	Aacs	none	332.685	0.237574	0.18463	0.563042	290.246	-0.160581	0.281364	0.746575	79.6584	0.378397	0.10831	0.768394	86.0366	-0.591324	0.0116064	0.0622124	27.9616	-0.259835	0.670945	0.885897	TRUE	-0.04843	0.7077	0.9999	TRUE	-0.09688	0.4808	0.6613
ENSMUSG00000037257	Aagab	none	233.409	0.109469	0.580879	0.853339	278.217	-0.203651	0.150226	0.598309	138.409	-0.121642	0.498812	0.977337	182.729	0.191934	0.290791	0.542303	182.618	-0.123497	0.679062	0.888836	TRUE	0.04009	0.6657	0.9999	TRUE	0.02684	0.7741	0.8739
ENSMUSG00000057230	Aak1	none	3375.22	0.0126886	0.910477	0.978261	2890.77	-0.033456	0.732937	0.949375	2475.63	0.0407873	0.709209	0.992723	778.982	-0.200762	0.146669	0.359603	191.038	-0.775843	0.0100074	0.0719844	TRUE	0.03344	0.7841	0.9999	TRUE	-0.2013	0.1179	0.2514
ENSMUSG00000035642	Aamdc	none	76.679	0.0699561	0.830561	NA	113.363	-0.226085	0.341402	0.789096	59.7188	-0.210643	0.417068	0.958938	181.723	0.144523	0.414519	0.656643	28.5478	0.738962	0.221843	0.545805	NA	NA	NA	NA	NA	NA	NA	NA
ENSMUSG00000006299	Aamp	none	665.851	0.0865186	0.534565	0.829649	734.155	-0.05264	0.63593	0.926634	257.472	0.165997	0.345397	0.950864	456.547	0.210986	0.155761	0.373973	181.848	0.168586	0.577289	0.833217	TRUE	-0.0617	0.5173	0.9999	TRUE	0.06741	0.4914	0.6702
ENSMUSG00000027628	Aar2	none	273.276	0.0418321	0.822769	0.953827	309.715	0.11518	0.45791	0.859414	186.511	0.303438	0.0746701	0.696486	109.822	-0.141214	0.519141	0.740237	38.0627	-0.0239994	0.963743	0.990939	NA	NA	NA	NA	NA	NA	NA	NA
ENSMUSG00000068522	Aard	none	7.97204	0.898408	0.336769	NA	NA	NA	NA	NA	8.04903	-0.308572	0.638051	0.991361	17.0512	0.543359	0.217359	0.455248	NA	NA	NA	NA	TRUE	-0.218	0.4918	0.9999	TRUE	0.6216	0.01956	0.06321
ENSMUSG00000031960	Aars	none	1631.51	0.177762	0.122708	0.47878	1308.7	-0.064377	0.522607	0.884031	1459.42	0.237424	0.0641127	0.665047	407.207	-0.219757	0.176048	0.4019	362.338	-0.330831	0.184555	0.500616	TRUE	-0.08658	0.3785	0.9999	TRUE	-0.1026	0.2578	0.4392
ENSMUSG00000023938	Aars2	none	75.5909	0.35428	0.285716	NA	59.3918	0.156562	0.56449	0.902869	42.8561	-0.202277	0.486404	0.974617	25.6924	-0.511819	0.196466	0.42886	7.12996	-0.558337	0.61646	0.854267	TRUE	-0.0512	0.709	0.9999	TRUE	-0.08606	0.4928	0.6716
ENSMUSG00000075528	Aarsd1	none	NA	NA	NA	NA	NA	NA	NA	NA	NA	NA	NA	NA	3.94816	-0.0273997	0.977201	0.990242	NA	NA	NA	NA	TRUE	-0.02498	0.8169	0.9999	TRUE	-0.1174	0.2712	0.4549
ENSMUSG00000055923	Aasdh	none	29.3796	-0.193353	0.693026	NA	31.1137	0.282882	0.430529	0.846581	11.7987	0.570791	0.285885	0.932376	26.71	-0.139495	0.699253	0.856013	7.22599	0.809925	0.476124	0.77687	TRUE	0.1074	0.4507	0.9999	TRUE	-0.1059	0.4224	0.6098
ENSMUSG00000025894	Aasdhppt	none	293.53	-0.263199	0.137371	0.496927	476.651	0.0560341	0.652814	0.930518	248.522	0.282173	0.0922518	0.738681	202.968	-0.0089285	0.960252	0.98456	55.4141	0.169676	0.703253	0.899728	TRUE	0.09795	0.4681	0.9999	TRUE	-0.1185	0.3257	0.5158
ENSMUSG00000029695	Aass	none	9.34285	0.625743	0.464667	NA	4.79284	-0.212035	0.818909	NA	8.22653	0.496945	0.474132	0.972919	172.932	0.144281	0.470484	0.705894	6.1622	-2.14637	0.0841799	0.313163	TRUE	0.4128	0.07003	0.8159	TRUE	0.8248	1.256e-05	0.0001038
ENSMUSG00000018697	Aatf	none	133.348	0.00732753	0.975841	0.995825	143.612	-0.100456	0.640555	0.927249	159.43	-0.132648	0.463458	0.970586	53.6798	-0.0367909	0.895203	0.958729	44.6017	-0.0567095	0.908084	0.978072	TRUE	0.07795	0.6435	0.9999	TRUE	-0.09474	0.5308	0.7021
ENSMUSG00000025375	Aatk	none	700.469	0.288955	0.0603201	0.349214	554.457	-0.0765455	0.518072	0.881738	355.028	0.0662059	0.635725	0.991361	399.745	0.475912	0.00258655	0.0189751	72.3287	-1.16286	0.00541854	0.0463297	TRUE	-0.01424	0.909	0.9999	TRUE	-0.0338	0.8188	0.9005
ENSMUSG00000057880	Abat	none	602.726	0.0353876	0.805645	0.948081	463.006	-0.27934	0.0458851	0.35335	1021.81	0.18241	0.159614	0.84254	1775.75	-0.192488	0.139806	0.348525	149.282	-2.4428	0.00446999	0.0399085	TRUE	0.03958	0.6978	0.9999	TRUE	-0.06037	0.5539	0.7205
ENSMUSG00000015243	Abca1	none	150.549	1.29971	2.86126e-07	7.95775e-05	206.181	0.463469	0.0254283	0.261104	498.219	0.338679	0.0827284	0.71557	10325.3	1.50397	3.03921e-24	3.36339e-22	6000.35	1.48381	1.27428e-14	1.51881e-12	TRUE	0.04834	0.7132	0.9999	TRUE	2.231	3.367e-99	2.151e-96
ENSMUSG00000035435	Abca17	none	NA	NA	NA	NA	NA	NA	NA	NA	NA	NA	NA	NA	NA	NA	NA	NA	NA	NA	NA	NA	TRUE	0.3372	0.3735	0.9999	TRUE	-0.237	0.4178	0.6053
ENSMUSG00000026944	Abca2	none	1210.48	0.0591662	0.635598	0.879966	862.501	-0.105101	0.355842	0.802495	2073	-0.267461	0.0638959	0.665013	1723.89	-0.0614952	0.678999	0.844502	254.78	-0.481579	0.106385	0.363012	TRUE	0.0249	0.8392	0.9999	TRUE	0.1221	0.3159	0.5058
ENSMUSG00000024130	Abca3	none	833.711	0.0698502	0.593011	0.858186	615.436	-0.152046	0.185055	0.651506	820.637	-0.132041	0.373688	0.956702	804.354	0.372449	0.0265016	0.114149	220.985	-0.052441	0.85866	0.960332	TRUE	-0.05194	0.5805	0.9999	TRUE	-0.01299	0.8844	0.9402
ENSMUSG00000018800	Abca5	none	887.389	-0.0819113	0.534548	0.829649	1108.75	0.0760351	0.554493	0.899293	3084.45	-0.166361	0.279686	0.926348	1741.96	0.118298	0.449904	0.686934	116.492	-0.194309	0.628348	0.862026	TRUE	0.1349	0.2002	0.9897	TRUE	0.06166	0.5849	0.7454
ENSMUSG00000044749	Abca6	none	16.8679	-0.109999	0.862479	NA	13.7653	-0.397157	0.466052	0.862086	23.1213	0.0349903	0.928319	0.995168	65.5391	0.358399	0.196829	0.429062	21.9022	0.255579	0.724851	0.908635	TRUE	0.2281	0.412	0.9999	TRUE	0.2064	0.3798	0.5688
ENSMUSG00000035722	Abca7	none	99.7899	0.0784243	0.783624	0.941395	55.9767	-0.242985	0.375981	0.815085	261.599	-0.270979	0.0891049	0.731814	148.42	-0.434344	0.0235406	0.104758	98.1734	0.090526	0.800096	0.936129	TRUE	0.1246	0.3763	0.9999	TRUE	-0.08746	0.4978	0.6763
ENSMUSG00000041828	Abca8a	none	21.4475	0.80658	0.167601	NA	14.1007	-1.08623	0.0454796	0.35335	11.566	-0.649355	0.216864	0.893498	195.836	-2.36932	9.925e-05	0.00122265	12.3462	-0.965396	0.277351	0.609354	TRUE	0.09394	0.5686	0.9999	TRUE	0.01769	0.9035	0.9513
ENSMUSG00000020620	Abca8b	none	221.035	0.0949056	0.636476	0.880154	350.101	0.264283	0.0996922	0.511832	196.096	-0.0537099	0.765268	0.994132	307.615	0.56415	0.00418769	0.0281069	18.6023	-1.19984	0.102648	0.354429	TRUE	-0.07785	0.4931	0.9999	TRUE	0.4641	7.007e-05	0.0004998
ENSMUSG00000041797	Abca9	none	15.9347	1.34479	0.0503476	NA	6.09263	-0.634148	0.479072	NA	10.2257	0.779337	0.18626	0.86859	34.316	0.381836	0.270696	0.518071	2403.82	-1.1119	3.76547e-08	1.71956e-06	TRUE	0.4216	0.01186	0.397	TRUE	1.013	7.955e-10	1.172e-08
ENSMUSG00000031974	Abcb10	none	34.162	-0.226053	0.637733	NA	41.212	1.09173	0.00138588	0.0422909	32.0669	0.0717439	0.835294	0.994132	65.8611	0.18841	0.460084	0.696222	14.5683	0.0955286	0.906884	0.978072	TRUE	-0.1165	0.2922	0.9999	TRUE	-0.1467	0.2419	0.4208
ENSMUSG00000040584	Abcb1a	none	24.3056	0.0265053	0.960337	NA	NA	NA	NA	NA	15.7247	0.211617	0.636321	0.991361	13.9377	0.564764	0.255654	0.502429	21.4754	-2.2642	0.00175027	0.0192272	TRUE	-0.1223	0.2973	0.9999	TRUE	0.1974	0.1254	0.2625
ENSMUSG00000028970	Abcb1b	none	18.3645	-0.241357	0.697052	NA	21.14	-0.495517	0.257626	0.72453	12.8026	0.0249812	0.960077	0.996968	61.2204	1.08455	8.87622e-05	0.00111645	125.413	0.808451	0.0144275	0.0932038	TRUE	-0.1975	0.3948	0.9999	TRUE	1.017	1.13e-10	1.81e-09
ENSMUSG00000042476	Abcb4	none	21.7474	0.145287	0.806519	NA	34.7313	0.0243417	0.944925	0.99017	9.42826	0.890421	0.13746	0.815721	67.3221	0.177528	0.515287	0.73732	100.844	-1.103	0.00192548	0.0207128	TRUE	-0.2374	0.2319	0.9954	TRUE	0.1581	0.334	0.5241
ENSMUSG00000026198	Abcb6	none	4.7446	0.27719	0.816138	NA	4.25735	-0.549327	0.593493	NA	4.49078	0.33064	0.706691	0.992723	4.31089	0.32851	0.704835	0.859243	NA	NA	NA	NA	TRUE	-0.1884	0.1387	0.9434	TRUE	-0.2326	0.0498	0.1324
ENSMUSG00000031333	Abcb7	none	394.125	-0.417383	0.0278575	0.234607	581.576	-0.208658	0.119922	0.550939	538.984	-0.0520883	0.714216	0.992897	399.095	-0.528025	0.000250982	0.00270417	165.855	-0.0857303	0.77397	0.927126	TRUE	0.1684	0.1514	0.9571	TRUE	-0.367	0.000499	0.002835
ENSMUSG00000028973	Abcb8	none	123.656	0.2494	0.321857	0.696212	122.502	-0.094576	0.630693	0.924479	80.6931	0.218998	0.32334	0.943961	166.121	0.139709	0.428029	0.667819	21.332	0.0695897	0.91715	0.979819	TRUE	-0.08515	0.4849	0.9999	TRUE	0.04618	0.6909	0.8202
ENSMUSG00000029408	Abcb9	none	168.963	0.0230389	0.920911	0.980716	64.281	-0.382117	0.138988	0.580886	141.979	0.0771231	0.693118	0.992723	138.694	-1.02069	1.52095e-05	0.000236269	16.8982	-1.75925	0.0351216	0.175299	TRUE	-0.169	0.2918	0.9999	TRUE	-0.5084	0.003924	0.01704
ENSMUSG00000023088	Abcc1	none	102.677	0.00294562	0.991476	0.999806	113.787	-0.205113	0.300507	0.759062	93.1157	-0.503055	0.0368881	0.544808	253.218	0.189006	0.321815	0.571776	181.106	0.0632695	0.829347	0.948837	TRUE	-0.1342	0.2336	0.9954	TRUE	0.09558	0.3735	0.5632
ENSMUSG00000032842	Abcc10	none	14.1839	0.243047	0.735397	NA	9.53249	-0.707312	0.264598	NA	13.0953	-0.28011	0.567249	0.982927	24.1972	-0.375483	0.349279	0.598022	NA	NA	NA	NA	TRUE	-0.004972	0.9778	0.9999	TRUE	0.2683	0.04346	0.1192
ENSMUSG00000020865	Abcc3	none	5.24024	1.37994	0.248606	NA	NA	NA	NA	NA	NA	NA	NA	NA	4.72865	3.04682	0.00576118	0.0364892	1338.67	-0.261262	0.198107	0.518157	TRUE	-0.1172	0.6952	0.9999	TRUE	1.633	5.289e-21	1.827e-19
ENSMUSG00000032849	Abcc4	none	16.7604	-0.57762	0.372647	NA	14.9455	0.981767	0.0804884	0.472335	22.6332	0.00712832	0.985898	0.997323	252.695	0.678538	0.000274468	0.00290891	47.075	-0.52787	0.274445	0.60666	TRUE	0.1429	0.3797	0.9999	TRUE	0.5203	0.0001164	0.0007864
ENSMUSG00000022822	Abcc5	none	721.184	-0.058635	0.675576	0.900464	661.095	-0.188524	0.14277	0.58586	514.23	-0.00570348	0.964763	0.997183	292.754	-0.0203516	0.91037	0.96592	105.097	-0.200914	0.612026	0.852289	TRUE	0.1858	0.04496	0.7033	TRUE	-0.2555	0.01543	0.05224
ENSMUSG00000040136	Abcc8	none	290.801	-0.244013	0.175229	0.551207	246.292	-0.326642	0.0508705	0.373347	357.472	-0.440358	0.00762924	0.3164	74.2528	-0.823847	0.00610446	0.0382057	13.1349	-1.84873	0.0367271	0.180144	TRUE	-0.07508	0.4572	0.9999	TRUE	-0.566	1.215e-06	1.193e-05
ENSMUSG00000030249	Abcc9	none	8.22523	0.111526	0.904736	NA	NA	NA	NA	NA	10.2943	0.290856	0.603084	0.988891	8.60029	-0.679632	0.293042	0.544368	14.1139	-0.715406	0.400706	0.720146	TRUE	-0.005146	0.9737	0.9999	TRUE	-0.5322	0.0013	0.006572
ENSMUSG00000031378	Abcd1	none	21.4075	0.0732252	0.899253	NA	18.9829	0.16863	0.725579	0.948636	8.5009	0.0987494	0.873697	0.994132	61.6266	-0.181861	0.473229	0.707786	98.5722	-0.100338	0.779593	0.928557	TRUE	-0.08058	0.56	0.9999	TRUE	0.279	0.01759	0.05822
ENSMUSG00000055782	Abcd2	none	468.471	-0.250798	0.099065	0.43019	188.841	-0.0418168	0.83601	0.971648	459.413	-0.0686255	0.623466	0.990737	971.271	0.0846244	0.561082	0.769306	323.952	0.750743	0.00534495	0.045898	TRUE	-0.04106	0.7429	0.9999	TRUE	0.4649	6.529e-05	0.0004687
ENSMUSG00000028127	Abcd3	none	459.458	-0.413335	0.00776442	0.118912	708.046	0.0410517	0.763577	0.957166	713.71	-0.0571418	0.643646	0.991361	1576.74	-0.219522	0.26065	0.507768	227.645	-0.186493	0.509332	0.799411	TRUE	0.0634	0.5196	0.9999	TRUE	0.1763	0.05413	0.1407
ENSMUSG00000021240	Abcd4	none	24.5575	0.104907	0.845395	NA	21.2704	0.34408	0.435372	0.848676	24.6237	0.116664	0.750941	0.994132	173.857	-0.0592477	0.776811	0.901166	19.739	-0.181608	0.798619	0.93488	TRUE	0.007888	0.9577	0.9999	TRUE	0.1041	0.3845	0.5733
ENSMUSG00000058355	Abce1	none	845.299	-0.22423	0.116859	0.469317	1201.32	0.0900559	0.362811	0.806321	643.388	0.0955664	0.482663	0.973802	408.128	-0.0806262	0.585449	0.786549	212.575	-0.0122844	0.967925	0.991725	TRUE	0.04371	0.6291	0.9999	TRUE	-0.1834	0.05243	0.1374
ENSMUSG00000038762	Abcf1	none	452.791	-0.111654	0.479214	0.79921	366.808	-0.26304	0.0430973	0.342282	184.94	-0.226558	0.275554	0.924885	103.251	-0.523438	0.0134514	0.0691011	95.0152	-0.334743	0.348468	0.680883	TRUE	0.05951	0.5391	0.9999	TRUE	-0.1468	0.1183	0.252
ENSMUSG00000028953	Abcf2	none	813.264	-0.166346	0.202469	0.586154	804.725	-0.194769	0.0850237	0.480501	374.131	0.185349	0.184078	0.867084	154.159	-0.51819	0.00924976	0.0526303	89.8657	-0.150841	0.678109	0.888741	TRUE	-0.01186	0.8997	0.9999	TRUE	-0.2186	0.009723	0.03597
ENSMUSG00000003234	Abcf3	none	404.499	0.115244	0.469299	0.79312	347.234	-0.0634094	0.635474	0.926634	263.186	0.0199152	0.900398	0.994132	125.869	-0.384334	0.0498745	0.177468	65.3017	0.0238798	0.954791	0.988181	TRUE	-0.04536	0.6174	0.9999	TRUE	-0.1126	0.223	0.3984
ENSMUSG00000024030	Abcg1	none	650.941	0.235475	0.100607	0.43387	628.147	0.11485	0.325438	0.774499	677.365	-0.00688583	0.958048	0.996155	166.598	0.851329	1.97334e-05	0.000295918	489.713	1.20682	1.0464e-06	3.4264e-05	TRUE	-0.04512	0.6156	0.9999	TRUE	0.3332	8.603e-05	0.0006001
ENSMUSG00000029802	Abcg2	none	87.6934	0.0580722	0.845496	NA	96.7546	0.530818	0.0170874	0.208554	26.7787	0.619132	0.0836298	0.719127	52.0811	0.20798	0.463677	0.699066	98.8725	0.565062	0.17079	0.480899	TRUE	-0.078	0.5893	0.9999	TRUE	0.1691	0.2426	0.4217
ENSMUSG00000032131	Abcg4	none	333.966	0.0860768	0.616972	0.869864	328.96	-0.150063	0.334124	0.783091	323.879	0.226518	0.146267	0.826356	103.048	-0.0851287	0.679655	0.844527	12.7024	-2.52195	0.00499963	0.0434334	TRUE	-0.06445	0.5687	0.9999	TRUE	-0.2987	0.002947	0.01328
ENSMUSG00000006638	Abhd1	none	NA	NA	NA	NA	NA	NA	NA	NA	NA	NA	NA	NA	12.5139	0.554283	0.289598	0.540871	NA	NA	NA	NA	TRUE	-0.2631	0.3049	0.9999	TRUE	-0.186	0.4153	0.6032
ENSMUSG00000033157	Abhd10	none	105.708	-0.231232	0.39996	0.751525	94.4126	-0.115974	0.600145	0.913242	122.163	0.185979	0.345062	0.950864	112.008	0.317361	0.139997	0.348796	17.3834	0.64816	0.385422	0.708494	TRUE	-0.05727	0.7061	0.9999	TRUE	-0.01777	0.8967	0.9471
ENSMUSG00000040532	Abhd11	none	97.3293	0.262349	0.352344	0.717984	54.9024	-0.410237	0.152013	0.601249	36.5554	0.00462045	0.988229	0.997356	106.126	0.285697	0.188264	0.418512	13.6544	-0.809462	0.329678	0.66206	TRUE	-0.1247	0.4224	0.9999	TRUE	0.3263	0.005969	0.02418
ENSMUSG00000085042	Abhd11os	none	NA	NA	NA	NA	NA	NA	NA	NA	NA	NA	NA	NA	32.6559	2.09915	8.13618e-08	2.04493e-06	NA	NA	NA	NA	NA	NA	NA	NA	NA	NA	NA	NA
ENSMUSG00000032046	Abhd12	none	2472.55	-0.0287241	0.803326	0.947181	2417.17	-0.0827018	0.389936	0.825035	1674.71	-0.132698	0.251329	0.915778	2042.82	-0.0770142	0.559493	0.767896	3415.82	0.897154	3.30473e-06	9.26802e-05	TRUE	-0.1008	0.3255	0.9999	TRUE	0.04623	0.6512	0.7928
ENSMUSG00000040396	Abhd13	none	141.366	0.00914157	0.971301	0.994397	171.186	0.22789	0.225135	0.694098	137.607	-0.032522	0.87847	0.994132	133.536	0.0222051	0.913698	0.966954	45.842	-0.195743	0.68101	0.889864	TRUE	0.0475	0.6673	0.9999	TRUE	-0.1437	0.1904	0.356
ENSMUSG00000042210	Abhd14a	none	53.7427	-0.13878	0.711913	NA	45.3044	-0.0993087	0.75165	0.953535	25.7544	-0.24692	0.493086	0.976414	100.331	-0.157501	0.518887	0.740037	9.40816	-0.787066	0.435602	0.750281	TRUE	-0.08333	0.4965	0.9999	TRUE	-0.1957	0.08907	0.2041
ENSMUSG00000042073	Abhd14b	none	14.4372	0.887418	0.203934	NA	8.49124	-0.475411	0.498147	NA	12.7591	0.398819	0.433439	0.96433	40.7423	0.171233	0.565053	0.77208	13.1326	-0.706832	0.405951	0.724646	TRUE	-0.01573	0.9068	0.9999	TRUE	0.1386	0.2478	0.4274
ENSMUSG00000007036	Abhd16a	none	421.715	0.167612	0.290831	0.6754	295.515	-0.0586499	0.680037	0.935363	341.355	-0.0440192	0.780187	0.994132	343.266	-0.013858	0.930472	0.974072	59.1336	0.100639	0.817858	0.942858	TRUE	-0.2101	0.0706	0.8167	TRUE	0.1023	0.3481	0.5376
ENSMUSG00000003346	Abhd17a	none	146.561	0.790542	0.00179655	0.0480439	102.791	-0.0102354	0.963784	0.99277	65.4667	-0.204321	0.406362	0.958839	60.1612	0.0624026	0.804428	0.913895	20.2637	-0.56075	0.421034	0.738719	NA	NA	NA	NA	NA	NA	NA	NA
ENSMUSG00000047368	Abhd17b	none	232.911	-0.100722	0.611776	0.86633	319.017	0.0290522	0.841326	0.972254	188.849	-0.198521	0.231203	0.904561	207.38	-0.217583	0.210899	0.447502	50.7235	-0.0183177	0.968282	0.991725	NA	NA	NA	NA	NA	NA	NA	NA
ENSMUSG00000038459	Abhd17c	none	49.4074	0.20405	0.592984	NA	135.115	0.217468	0.297877	0.757972	23.2533	0.195683	0.6118	0.989253	48.4465	-0.319437	0.242625	0.486011	63.1618	1.61245	0.000314097	0.00472693	NA	NA	NA	NA	NA	NA	NA	NA
ENSMUSG00000037818	Abhd18	none	37.6254	-0.39673	0.364711	NA	47.8877	-0.0420497	0.88861	0.980844	26.1998	-0.190729	0.603481	0.989193	32.4764	-0.783876	0.0198522	0.0924965	7.68712	0.665724	0.544693	0.820512	NA	NA	NA	NA	NA	NA	NA	NA
ENSMUSG00000039202	Abhd2	none	954.156	-0.0663533	0.607041	0.86367	631.825	0.366503	0.00108486	0.03605	241.039	-0.0156628	0.921154	0.994789	1264.63	0.953571	2.12026e-08	5.97019e-07	182.767	-0.101474	0.727967	0.909126	TRUE	0.002285	0.9873	0.9999	TRUE	0.07878	0.4141	0.6019
ENSMUSG00000002475	Abhd3	none	96.0521	0.110743	0.712783	0.91633	63.3409	-0.12391	0.64496	0.927376	533.447	-0.397436	0.00182818	0.172925	2417.73	-0.397776	0.0218105	0.0992245	50.7378	-1.05761	0.0426663	0.198959	TRUE	0.06202	0.5304	0.9999	TRUE	0.1666	0.08583	0.1985
ENSMUSG00000040997	Abhd4	none	74.5088	0.822639	0.0110481	NA	53.4217	0.300753	0.290673	0.751809	37.34	0.787198	0.0258064	0.485157	2041.18	1.24767	4.43097e-20	3.90472e-18	166.781	0.796841	0.0122328	0.0830313	TRUE	0.04636	0.6054	0.9999	TRUE	1.225	1.377e-36	1.015e-34
ENSMUSG00000032540	Abhd5	none	31.6747	0.290867	0.534931	NA	19.7825	0.193014	0.705637	0.942708	12.2039	-0.350078	0.497601	0.977337	108.541	0.162806	0.443689	0.681782	44.3158	1.22055	0.0166207	0.103018	TRUE	0.0785	0.5965	0.9999	TRUE	0.2009	0.1106	0.2396
ENSMUSG00000025277	Abhd6	none	336.548	-0.0568994	0.752774	0.930495	413.778	-0.111422	0.445773	0.855779	301.607	-0.00547865	0.971659	0.997323	380.685	-0.491565	0.0106394	0.0584635	102.559	-0.342314	0.331934	0.66437	TRUE	0.1409	0.1368	0.9416	TRUE	-0.4095	5.566e-05	0.0004053
ENSMUSG00000007950	Abhd8	none	543.444	0.326969	0.039966	0.281544	333.927	-0.368825	0.00990955	0.154239	243.934	-0.0642646	0.702078	0.992723	197.436	-0.178377	0.2928	0.54413	19.0893	-0.858934	0.226019	0.550259	TRUE	0.02521	0.8585	0.9999	TRUE	-0.2779	0.08518	0.1975
ENSMUSG00000058835	Abi1	none	879.327	-0.222007	0.0805611	0.39443	1762.6	0.277846	0.00873833	0.142564	286.294	0.080777	0.577774	0.983338	777.281	-0.200573	0.184862	0.413779	419.152	0.32428	0.256182	0.586998	TRUE	-0.08988	0.3102	0.9999	TRUE	0.01187	0.9049	0.9518
ENSMUSG00000026782	Abi2	none	1197.32	-0.228018	0.0712425	0.371611	1440.09	-0.016945	0.870751	0.9775	303.163	-0.0184555	0.911934	0.994132	666.762	-0.11734	0.404246	0.647382	77.6859	-0.0889012	0.82983	0.948986	TRUE	-0.09291	0.3276	0.9999	TRUE	-0.2753	0.006038	0.02438
ENSMUSG00000035258	Abi3bp	none	181.103	-0.308069	0.584988	0.854638	11.5145	-0.470081	0.430749	NA	9.97686	-0.248777	0.669278	0.991361	498.637	-1.13109	8.74633e-09	2.62869e-07	10.3276	1.04133	0.286817	0.619644	TRUE	-0.5865	0.04419	0.6999	TRUE	0.2775	0.3428	0.5322
ENSMUSG00000038827	Abitram	none	93.6824	-0.391372	0.184239	NA	86.3259	-0.0436243	0.845077	0.974113	50.1803	0.224374	0.444792	0.965574	82.1123	-0.179813	0.476205	0.709474	31.2107	0.449606	0.437246	0.751484	NA	NA	NA	NA	NA	NA	NA	NA
ENSMUSG00000026842	Abl1	none	76.9116	0.254743	0.43186	NA	61.1279	0.134136	0.629998	0.924479	32.4811	0.187644	0.564835	0.982295	76.866	0.304214	0.194027	0.425749	143.426	-0.74672	0.024737	0.136374	TRUE	-0.03787	0.7065	0.9999	TRUE	0.2361	0.00776	0.02991
ENSMUSG00000026596	Abl2	none	230.202	0.479944	0.0150256	0.166199	304.35	0.236485	0.0881428	0.482736	61.7479	0.199091	0.415124	0.958938	145.63	-0.128232	0.500487	0.726572	66.3167	0.980915	0.0248752	0.137009	TRUE	0.03676	0.6729	0.9999	TRUE	-0.228	0.01359	0.04718
ENSMUSG00000025085	Ablim1	none	595.82	-0.412724	0.0109228	0.139351	231.217	0.220802	0.211184	0.680475	586.226	-0.140495	0.305012	0.939405	224.861	-0.491658	0.0054929	0.0352276	37.8943	-0.618282	0.234696	0.562392	TRUE	-0.01792	0.8413	0.9999	TRUE	-0.246	0.0152	0.05167
ENSMUSG00000029095	Ablim2	none	504.047	-0.0600879	0.693464	0.907232	355.365	-0.18627	0.170741	0.632571	296.393	-0.14478	0.365118	0.956332	134.002	0.118931	0.552534	0.763101	16.4898	-2.04	0.0111481	0.0775731	TRUE	-0.01156	0.9181	0.9999	TRUE	-0.07442	0.41	0.5982
ENSMUSG00000032735	Ablim3	none	59.9653	0.147544	0.676827	NA	69.6906	0.355077	0.162769	0.619781	53.8178	-0.116322	0.675349	0.991399	17.9829	-0.672843	0.131113	0.334683	NA	NA	NA	NA	TRUE	-0.1017	0.3466	0.9999	TRUE	-0.1093	0.4168	0.6043
ENSMUSG00000017631	Abr	none	3266.75	0.0095602	0.934559	0.9845	3890.39	0.218568	0.0269164	0.267019	919.51	0.122964	0.377978	0.957654	1742.91	-0.400994	0.00573492	0.0363944	276.366	-0.14554	0.603445	0.848129	TRUE	-0.1421	0.2644	0.9999	TRUE	-0.1582	0.2441	0.4229
ENSMUSG00000042895	Abra	none	NA	NA	NA	NA	NA	NA	NA	NA	NA	NA	NA	NA	NA	NA	NA	NA	NA	NA	NA	NA	NA	NA	NA	NA	NA	NA	NA	NA
ENSMUSG00000078453	Abracl	none	54.7943	-0.0202495	0.955818	NA	178.411	0.121729	0.496344	0.875807	23.7096	-0.144789	0.708358	0.992723	28.426	0.955125	0.00765375	0.0453758	91.8926	0.949174	0.0161827	0.101091	NA	NA	NA	NA	NA	NA	NA	NA
ENSMUSG00000035234	Abraxas1	none	27.7473	-0.0638748	0.900258	NA	35.2077	0.302035	0.400783	0.82904	23.9795	-0.0494657	0.894079	0.994132	26.6289	0.494016	0.189216	0.41984	12.3126	0.362555	0.713229	0.904551	NA	NA	NA	NA	NA	NA	NA	NA
ENSMUSG00000030965	Abraxas2	none	161.963	0.253799	0.272253	0.659572	165.464	0.135887	0.472801	0.864885	116.968	0.00818342	0.967278	0.997183	87.1125	-0.138286	0.537215	0.753441	103.361	0.125361	0.719937	0.907029	NA	NA	NA	NA	NA	NA	NA	NA
ENSMUSG00000036376	Abt1	none	90.4959	-0.0904051	0.763319	NA	73.3441	-0.331187	0.175829	0.638753	51.7578	-0.365517	0.164383	0.845848	35.0014	-0.270113	0.40347	0.646704	18.3714	0.586911	0.438089	0.751957	TRUE	-0.07136	0.6803	0.9999	TRUE	-0.1727	0.275	0.4587
ENSMUSG00000030083	Abtb1	none	74.1319	0.593738	0.0650767	NA	35.8031	-0.242736	0.475206	0.866811	34.9822	0.193545	0.574017	0.983338	13.9221	-0.252709	0.59853	0.794774	23.076	-0.608295	0.358743	0.689654	TRUE	-0.1575	0.2492	0.9999	TRUE	-0.004776	0.9707	0.9865
ENSMUSG00000032724	Abtb2	none	7.58316	0.881354	0.373307	NA	NA	NA	NA	NA	18.4634	0.0683656	0.871381	0.994132	50.7687	-0.175858	0.519432	0.74043	NA	NA	NA	NA	TRUE	-0.1184	0.5014	0.9999	TRUE	0.5721	4.25e-05	0.0003165
ENSMUSG00000036138	Acaa1a	none	137.617	-0.01551	0.949523	0.989424	131.26	0.14837	0.468525	0.862527	43.6311	0.495745	0.110176	0.771034	132.71	0.0457023	0.816296	0.92053	60.6079	0.225331	0.600008	0.846331	TRUE	-0.0462	0.6903	0.9999	TRUE	0.1652	0.1392	0.2831
ENSMUSG00000036880	Acaa2	none	22.8278	0.086546	0.879924	NA	15.5536	-0.306339	0.563674	0.902338	14.8803	0.309415	0.53233	0.979195	406.785	-0.538449	0.00103476	0.00900196	56.4604	0.483565	0.273651	0.605864	TRUE	0.2765	0.1383	0.9424	TRUE	0.1834	0.3133	0.503
ENSMUSG00000020532	Acaca	none	196.076	-0.156331	0.449719	0.781159	150.784	-0.0469025	0.802831	0.96757	103.553	0.191409	0.339891	0.948922	217.363	-0.235258	0.213699	0.450963	57.6658	2.43114	4.70873e-06	0.000125556	TRUE	-0.02462	0.7919	0.9999	TRUE	-0.09952	0.2891	0.4745
ENSMUSG00000042010	Acacb	none	NA	NA	NA	NA	NA	NA	NA	NA	NA	NA	NA	NA	35.4963	-0.935965	0.00389836	0.0264704	NA	NA	NA	NA	TRUE	0.3159	0.2516	0.9999	TRUE	0.5161	0.01074	0.03907
ENSMUSG00000090150	Acad11	none	155.692	0.12813	0.587288	0.855344	166.669	0.230078	0.192583	0.661587	99.2416	0.142083	0.506455	0.977729	210.59	-0.674266	7.7003e-05	0.000992143	26.5882	-0.443253	0.460785	0.766892	TRUE	-0.003896	0.9717	0.9999	TRUE	0.1813	0.115	0.2467
ENSMUSG00000042647	Acad12	none	5.80457	0.574224	0.611977	NA	4.79722	0.771167	0.394326	NA	NA	NA	NA	NA	16.9387	-0.481344	0.268506	0.515699	5.65835	1.01774	0.431931	0.747606	TRUE	0.2013	0.4779	0.9999	TRUE	0.6289	0.01363	0.04728
ENSMUSG00000031969	Acad8	none	76.5331	0.333402	0.293826	NA	101.57	0.0642104	0.766892	0.958548	69.9158	-0.0139006	0.953953	0.995591	127.766	-0.0328029	0.870595	0.946993	29.9964	0.213705	0.715919	0.90511	TRUE	0.2364	0.1135	0.9087	TRUE	0.003811	0.9764	0.9887
ENSMUSG00000027710	Acad9	none	272.468	-0.07861	0.687836	0.904883	261.862	-0.151794	0.30167	0.759062	221.215	0.0614498	0.702576	0.992723	208.568	-0.220868	0.233767	0.475238	56.6196	-0.703452	0.120397	0.389573	TRUE	0.07524	0.4586	0.9999	TRUE	-0.1365	0.1814	0.3431
ENSMUSG00000026003	Acadl	none	51.7911	-0.0855108	0.824595	NA	28.5417	-0.292322	0.511389	0.880744	112.705	0.517338	0.00986071	0.349485	727.815	-0.333242	0.0180751	0.0863774	127.477	0.834534	0.0160218	0.100455	TRUE	0.07231	0.5081	0.9999	TRUE	0.1815	0.09435	0.213
ENSMUSG00000062908	Acadm	none	108.995	-0.355768	0.205674	0.59084	105.575	-0.12796	0.538863	0.891674	71.7138	0.0698701	0.770692	0.994132	400.16	-0.206414	0.19675	0.429062	115.392	0.115065	0.736009	0.911306	TRUE	0.199	0.09277	0.8707	TRUE	0.1464	0.1652	0.3208
ENSMUSG00000029545	Acads	none	7.94316	0.937034	0.320769	NA	NA	NA	NA	NA	4.55583	-0.569832	0.509513	0.977729	79.7125	-0.0511946	0.831235	0.926615	86.5271	-0.194461	0.603803	0.848171	TRUE	0.1008	0.6626	0.9999	TRUE	0.7981	3.677e-06	3.349e-05
ENSMUSG00000030861	Acadsb	none	311.032	0.00693274	0.96858	0.994151	499.514	-0.0711612	0.57196	0.904974	308.06	-0.0768145	0.606548	0.989253	816.439	-0.0662958	0.613167	0.804261	164.954	0.174846	0.559221	0.827172	TRUE	0.1167	0.2519	0.9999	TRUE	0.1856	0.05458	0.1416
ENSMUSG00000018574	Acadvl	none	142.322	0.288287	0.228457	0.61832	126.859	0.296983	0.132843	0.572658	131.754	0.406796	0.0429037	0.576109	377.766	0.127785	0.43275	0.672978	100.263	-0.0373283	0.91585	0.979787	TRUE	0.1039	0.2899	0.9999	TRUE	0.2879	0.002684	0.01225
ENSMUSG00000030607	Acan	none	13.1056	0.246681	0.734048	NA	26.0293	1.31642	0.00130463	0.0406121	648.27	-0.496714	0.0117413	0.37592	34.7742	1.89082	1.14945e-07	2.8195e-06	9.72494	-0.36902	0.716286	0.90511	TRUE	-0.3478	0.112	0.9052	TRUE	-0.4767	0.05484	0.1421
ENSMUSG00000049076	Acap2	none	588.894	0.119261	0.411329	0.758895	1065.02	0.421213	7.35404e-05	0.00527592	131.171	-0.11185	0.574343	0.983338	434.561	-0.393213	0.0122609	0.0644704	330.525	-0.259189	0.328999	0.661272	TRUE	0.009102	0.9262	0.9999	TRUE	0.1435	0.1697	0.3269
ENSMUSG00000029033	Acap3	none	771.562	0.319282	0.0285188	0.23744	656.951	0.398857	0.00221268	0.0569358	122.363	0.236907	0.290249	0.935569	161.865	0.540983	0.00937022	0.0531886	20.2031	-1.91314	0.0107238	0.0753634	TRUE	-0.1516	0.1868	0.9878	TRUE	0.1185	0.219	0.3931
ENSMUSG00000032047	Acat1	none	880.771	-0.113837	0.394003	0.746834	1056.98	0.10366	0.398948	0.828962	805.94	0.173413	0.187719	0.86867	804.2	-0.273729	0.0683584	0.218256	202.585	-0.548586	0.051527	0.224906	TRUE	0.04967	0.5905	0.9999	TRUE	-0.08599	0.3329	0.5231
ENSMUSG00000023832	Acat2	none	102.373	0.0150705	0.956114	0.99082	59.5929	0.136962	0.609889	0.917849	57.7704	0.152936	0.583111	0.984714	57.8654	-0.430416	0.0974084	0.277178	13.0455	-0.263713	0.751844	0.918751	TRUE	-0.2042	0.1116	0.9031	TRUE	-0.3501	0.004713	0.01993
ENSMUSG00000026499	Acbd3	none	283.652	-0.0752554	0.676953	0.900583	236.532	-0.0384768	0.819032	0.96924	244.453	-0.136695	0.370518	0.956332	208.128	-0.571575	0.00148181	0.0120068	178.904	0.343653	0.249505	0.579976	TRUE	0.1	0.3754	0.9999	TRUE	0.01663	0.8965	0.9471
ENSMUSG00000056938	Acbd4	none	66.0995	-0.354583	0.294114	NA	55.5041	-0.00716103	0.980136	0.995168	74.4929	0.233569	0.304363	0.939405	53.8187	0.176538	0.509734	0.732605	4.72146	0.182188	0.8945	0.97384	TRUE	0.01974	0.8928	0.9999	TRUE	0.02872	0.8257	0.905
ENSMUSG00000026781	Acbd5	none	167.483	0.0236965	0.915407	0.979677	184.21	0.174156	0.333389	0.782735	198.445	-0.0159342	0.9247	0.994877	639.248	0.0720406	0.640283	0.822448	169.069	0.508016	0.0877846	0.321606	TRUE	0.03903	0.6869	0.9999	TRUE	0.06423	0.4624	0.6463
ENSMUSG00000033701	Acbd6	none	376.319	0.136205	0.418967	0.762387	299.033	0.204918	0.192242	0.661587	252.774	-0.000212137	0.998875	0.999463	167.639	0.121078	0.527355	0.745989	52.6489	0.520764	0.254614	0.585826	TRUE	-0.1272	0.3787	0.9999	TRUE	-0.006845	0.9567	0.9795
ENSMUSG00000040272	Accs	none	5.73657	0.7287	0.525358	NA	NA	NA	NA	NA	13.5912	0.378702	0.429687	0.962425	16.3165	1.10095	0.017741	0.085204	27.5132	-0.152957	0.797078	0.93453	TRUE	-0.02902	0.9132	0.9999	TRUE	0.8896	9.553e-05	0.0006614
ENSMUSG00000038000	Acd	none	103.16	0.267543	0.331283	0.703118	71.6139	-0.109058	0.674617	0.935363	55.445	-0.0154658	0.952771	0.995591	55.3525	0.152776	0.562495	0.770608	18.355	0.285002	0.701783	0.898835	TRUE	-0.1831	0.1499	0.9537	TRUE	-0.1597	0.1558	0.3072
ENSMUSG00000020681	Ace	none	136.404	0.087064	0.724689	0.918812	57.7167	-0.392513	0.149325	0.597134	159.767	-0.498402	0.0176274	0.4354	301.648	-0.284936	0.0911701	0.265484	31.7237	-0.591491	0.303707	0.638732	TRUE	1.888	0.001199	0.1122	TRUE	0.3591	0.5029	0.6809
ENSMUSG00000038007	Acer2	none	10.2275	-0.823702	0.313801	NA	NA	NA	NA	NA	NA	NA	NA	NA	4.69822	1.24823	0.137501	0.34547	NA	NA	NA	NA	TRUE	0.1192	0.7407	0.9999	TRUE	0.1227	0.58	0.7422
ENSMUSG00000030760	Acer3	none	80.1775	-0.661824	0.0315447	NA	121.493	-0.182304	0.353033	0.799531	165.825	-0.106731	0.609533	0.989253	264.275	-0.0990406	0.570377	0.775643	368.025	0.686162	0.00702478	0.0559354	TRUE	0.03488	0.8465	0.9999	TRUE	0.7958	5.699e-09	7.632e-08
ENSMUSG00000023328	Ache	none	263.2	0.0181207	0.924573	0.982509	228.622	0.294655	0.129383	0.567418	488.218	0.00162111	0.990458	0.997358	295.613	-0.0100086	0.954574	0.982516	47.3373	-0.612023	0.22334	0.547275	TRUE	-0.2611	0.03533	0.6341	TRUE	0.1645	0.2208	0.3955
ENSMUSG00000022185	Acin1	none	566.144	0.197095	0.215655	0.602476	450.501	-0.22149	0.146448	0.591745	510.734	-0.140082	0.321917	0.94237	316.306	-0.871811	2.81118e-08	7.79269e-07	288.901	-0.317461	0.237215	0.565585	TRUE	0.1413	0.1004	0.8881	TRUE	-0.08174	0.4046	0.5933
ENSMUSG00000044534	Ackr2	none	9.16848	0.707729	0.427729	NA	NA	NA	NA	NA	NA	NA	NA	NA	NA	NA	NA	NA	NA	NA	NA	NA	NA	NA	NA	NA	NA	NA	NA	NA
ENSMUSG00000044337	Ackr3	none	47.3077	0.0829653	0.831867	NA	85.9969	0.766798	0.00265885	0.06415	22.9062	0.23782	0.529048	0.979024	169.879	0.344393	0.0759142	0.235138	10.1322	-0.741181	0.451459	0.761417	NA	NA	NA	NA	NA	NA	NA	NA
ENSMUSG00000020917	Acly	none	1249.37	-0.000543433	0.99632	0.999806	941.188	-0.0615874	0.558163	0.899293	970.869	0.295617	0.0288545	0.502369	358.823	-0.663892	1.65591e-05	0.000254465	456.077	-0.152351	0.5148	0.802288	TRUE	0.01554	0.8682	0.9999	TRUE	-0.1928	0.03056	0.09027
ENSMUSG00000028405	Aco1	none	179.471	-0.0988506	0.645171	0.885307	194.359	0.0637627	0.702349	0.942708	119.117	-0.154898	0.426207	0.962425	207.065	-0.355181	0.0502987	0.178188	92.5793	0.101391	0.788511	0.931166	TRUE	-0.1268	0.2354	0.9954	TRUE	0.09481	0.3607	0.55
ENSMUSG00000022477	Aco2	none	2391.71	0.0798426	0.5223	0.82479	2763.58	-0.0301652	0.752026	0.953535	2348.83	0.233728	0.0633888	0.663493	1421.06	-0.308757	0.0156634	0.0772671	312.563	-0.688683	0.023282	0.130842	TRUE	-0.03567	0.7647	0.9999	TRUE	-0.2424	0.04062	0.1134
ENSMUSG00000072949	Acot1	none	14.9334	0.318462	0.637958	NA	25.4805	0.565145	0.16642	0.626114	4.09252	0.948112	0.279642	0.926348	37.722	-0.550137	0.0977809	0.277884	NA	NA	NA	NA	TRUE	0.3399	0.0905	0.8636	TRUE	0.3206	0.1185	0.2522
ENSMUSG00000047565	Acot10	none	5.5707	0.262852	0.809643	NA	NA	NA	NA	NA	NA	NA	NA	NA	NA	NA	NA	NA	NA	NA	NA	NA	NA	NA	NA	NA	NA	NA	NA	NA
ENSMUSG00000034853	Acot11	none	27.076	0.919643	0.0773416	NA	6.15367	1.01898	0.212415	NA	8.12032	0.630793	0.318736	0.940643	695.575	-0.722961	3.64469e-07	8.20689e-06	8.05224	-0.673983	0.529932	0.812152	TRUE	0.06346	0.5556	0.9999	TRUE	0.3635	0.00043	0.002487
ENSMUSG00000006717	Acot13	none	741.665	-0.0472769	0.724142	0.918333	1334.3	0.243179	0.0374614	0.318241	654.003	0.0630427	0.615911	0.98964	697.92	-0.0184543	0.901284	0.961027	185.127	0.538709	0.0772518	0.295212	TRUE	0.1199	0.2597	0.9999	TRUE	-0.1188	0.2734	0.4572
ENSMUSG00000021226	Acot2	none	16.2944	0.522754	0.445252	NA	33.9986	-0.0728605	0.846782	0.975145	NA	NA	NA	NA	23.7114	0.292465	0.443226	0.681402	11.9138	-0.410608	0.638769	0.867733	TRUE	0.07016	0.7339	0.9999	TRUE	0.1226	0.5411	0.7106
ENSMUSG00000021228	Acot3	none	NA	NA	NA	NA	8.85263	0.267754	0.700899	NA	NA	NA	NA	NA	NA	NA	NA	NA	NA	NA	NA	NA	TRUE	-0.05688	0.8453	0.9999	TRUE	-0.08664	0.7494	0.8584
ENSMUSG00000052392	Acot4	none	6.49428	0.0580774	0.954536	NA	10.2186	0.700829	0.264688	NA	NA	NA	NA	NA	NA	NA	NA	NA	NA	NA	NA	NA	TRUE	-0.1634	0.5991	0.9999	TRUE	0.4272	0.1237	0.2602
ENSMUSG00000042540	Acot5	none	12.5806	0.10193	0.889376	NA	29.1577	0.114619	0.761984	0.956775	NA	NA	NA	NA	NA	NA	NA	NA	NA	NA	NA	NA	TRUE	-0.3926	0.2328	0.9954	TRUE	-0.07031	0.7809	0.8783
ENSMUSG00000043487	Acot6	none	25.5693	-0.274844	0.595503	NA	55.4776	-0.081467	0.770561	0.959036	21.1426	0.131992	0.735566	0.994132	34.0178	-0.918341	0.006619	0.040468	7.28495	0.269582	0.808678	0.939896	TRUE	0.1464	0.5753	0.9999	TRUE	-0.09447	0.7105	0.834
ENSMUSG00000028937	Acot7	none	2518.78	0.0101951	0.926062	0.982756	2319.11	-0.356991	0.000872509	0.0313513	2037.07	0.0427969	0.733828	0.994132	398.544	-0.24374	0.16711	0.389942	90.2965	-1.27052	0.00339596	0.0326686	TRUE	-0.01459	0.8981	0.9999	TRUE	-0.4658	8.483e-05	0.0005937
ENSMUSG00000017307	Acot8	none	38.3637	0.235196	0.587589	NA	31.138	-0.158149	0.655938	0.932164	23.3598	0.0292658	0.937618	0.995591	31.2191	0.105188	0.752927	0.888178	12.0418	-0.54689	0.535024	0.815258	TRUE	0.009261	0.9645	0.9999	TRUE	0.07174	0.7209	0.8412
ENSMUSG00000025287	Acot9	none	145.762	-0.0309277	0.89698	0.97525	132.867	-0.238967	0.215576	0.683845	61.9661	0.572561	0.0229267	0.4674	34.5486	0.275399	0.38467	0.629931	47.4135	1.57888	0.00169181	0.0186875	TRUE	-0.06724	0.6639	0.9999	TRUE	-0.04542	0.7418	0.8544
ENSMUSG00000020777	Acox1	none	1279.56	0.138521	0.254996	0.64442	1437.92	0.0847	0.411306	0.834552	650.763	0.0970261	0.429799	0.962425	2253.73	0.478153	0.000178902	0.00202831	222.175	-0.347716	0.206337	0.530645	TRUE	0.03139	0.7294	0.9999	TRUE	0.3239	0.001224	0.006219
ENSMUSG00000029098	Acox3	none	149.234	0.548879	0.0203479	0.192262	116.252	0.239283	0.227863	0.696709	204.377	0.263155	0.097818	0.750534	168.617	0.68763	0.000273745	0.00290353	360.572	0.629022	0.0189112	0.113217	TRUE	-0.1737	0.1209	0.926	TRUE	0.7053	4.94e-13	9.825e-12
ENSMUSG00000044573	Acp1	none	28.9413	-0.351973	0.502451	NA	46.6857	-0.126248	0.709009	0.943861	27.0994	-0.346579	0.379307	0.957654	46.9781	-0.0371089	0.896275	0.95909	5.9751	0.938929	0.490906	0.78824	TRUE	-0.09404	0.3419	0.9999	TRUE	-0.03872	0.6975	0.8248
ENSMUSG00000002103	Acp2	none	527.699	0.064959	0.684436	0.90307	539.93	-0.2371	0.0524656	0.37992	523.946	-0.199064	0.167873	0.846891	1160.58	-0.0967254	0.504717	0.72899	842.156	0.533572	0.013809	0.0905532	TRUE	0.03868	0.6556	0.9999	TRUE	0.1467	0.07843	0.1859
ENSMUSG00000028093	Acp6	none	38.2465	-0.0745949	0.862086	NA	52.6218	0.0201452	0.943737	0.990159	22.7617	-0.190948	0.632854	0.991361	30.5849	0.282065	0.397616	0.641408	19.1864	0.398974	0.579567	0.834483	TRUE	0.08048	0.5667	0.9999	TRUE	-0.08992	0.5138	0.6899
ENSMUSG00000037469	Acp7	none	8.2058	-0.764619	0.402006	NA	11.6453	0.849664	0.175967	NA	NA	NA	NA	NA	6.075	-0.488921	0.491034	0.720025	NA	NA	NA	NA	NA	NA	NA	NA	NA	NA	NA	NA
ENSMUSG00000032281	Acsbg1	none	171.472	0.532747	0.0233183	0.211355	33.0987	0.162073	0.714884	0.945399	60.5013	0.615748	0.0516944	0.616875	4285.55	-0.17478	0.240458	0.483303	57.9544	-1.14314	0.03021	0.157996	TRUE	-0.09731	0.3569	0.9999	TRUE	0.6835	1.033e-11	1.829e-10
ENSMUSG00000015016	Acsf3	none	76.1648	0.0392563	0.908035	NA	52.1266	0.0176792	0.951364	0.991618	61.6999	0.197213	0.470029	0.971512	59.9609	0.22974	0.396654	0.640931	15.4557	-0.0791351	0.919994	0.980807	TRUE	-0.177	0.2205	0.9954	TRUE	0.06052	0.6329	0.78
ENSMUSG00000018796	Acsl1	none	383.576	0.043506	0.787366	0.942269	357.349	0.128987	0.347947	0.795525	147.966	0.235402	0.215555	0.892104	80.5501	0.447588	0.0517747	0.181796	89.1351	-0.0167655	0.964409	0.990939	TRUE	-0.1547	0.1213	0.9262	TRUE	-0.1214	0.2119	0.3843
ENSMUSG00000032883	Acsl3	none	1013.51	-0.36429	0.0067796	0.10988	1118.62	0.0673271	0.55231	0.898155	757.099	0.0212656	0.87149	0.994132	7096.05	-0.058762	0.720033	0.868732	94.3574	-1.29359	0.00133772	0.0157397	TRUE	0.1559	0.2093	0.9954	TRUE	0.1234	0.2966	0.4834
ENSMUSG00000031278	Acsl4	none	1678.02	-0.0568791	0.631634	0.878188	2082.23	0.0195926	0.862538	0.977046	808.61	-0.076816	0.588653	0.986324	610.182	-0.273361	0.137964	0.346086	382.457	0.216641	0.382507	0.706509	TRUE	0.1125	0.1967	0.9879	TRUE	-0.1908	0.05303	0.1385
ENSMUSG00000024981	Acsl5	none	474.359	-0.140763	0.357356	0.722505	355.883	0.0213624	0.882357	0.980035	79.2593	0.0811041	0.744753	0.994132	136.284	0.391094	0.0500936	0.177939	175.464	0.334253	0.259874	0.591044	TRUE	-0.1173	0.291	0.9999	TRUE	-0.1069	0.2454	0.4246
ENSMUSG00000020333	Acsl6	none	865.517	-0.0144377	0.912816	0.979144	718.076	0.101463	0.383294	0.81909	1618.94	0.129297	0.2404	0.908037	4536.64	-0.755656	4.92602e-07	1.08524e-05	110.146	-1.99628	3.27949e-07	1.22534e-05	TRUE	-0.003701	0.9667	0.9999	TRUE	-0.07724	0.4209	0.6082
ENSMUSG00000027452	Acss1	none	17.383	0.364571	0.561406	NA	18.6157	0.131065	0.778533	0.959607	6.41615	0.107803	0.879525	0.994132	201.344	-0.76298	2.48836e-05	0.000362488	78.7806	-0.101241	0.795548	0.93453	TRUE	0.1333	0.2059	0.9954	TRUE	0.1882	0.08424	0.1958
ENSMUSG00000027605	Acss2	none	236.122	0.00327842	0.986378	0.998295	230.255	-0.294615	0.053947	0.384226	250.132	0.0537787	0.745701	0.994132	201.609	-1.17228	2.567e-11	1.06222e-09	21.9725	-1.03629	0.172334	0.483192	TRUE	0.007724	0.9347	0.9999	TRUE	-0.4923	1.854e-06	1.767e-05
ENSMUSG00000031972	Acta1	none	73.7016	-0.151016	0.645729	NA	46.3295	-0.110334	0.718944	0.946536	17.5258	0.443922	0.35229	0.9512	14.4767	0.334986	0.481872	0.713684	NA	NA	NA	NA	TRUE	-0.3668	0.2133	0.9954	TRUE	-0.2922	0.1732	0.3319
ENSMUSG00000035783	Acta2	none	14.1556	0.667873	0.355845	NA	4.4724	-0.160166	0.863503	NA	10.939	1.19219	0.0332639	0.524541	17.4157	-0.717651	0.107127	0.295183	7.14904	0.209022	0.853399	0.958288	TRUE	-0.01283	0.9494	0.9999	TRUE	-0.5795	0.0001849	0.001182
ENSMUSG00000029580	Actb	none	13293.7	0.413923	4.92185e-05	0.00412309	19124	0.119295	0.221404	0.68999	4741.54	0.357065	0.00752602	0.316154	7958.21	0.595906	1.27659e-05	0.0002034	13466.3	0.0341652	0.884478	0.97034	TRUE	-0.1129	0.4027	0.9999	TRUE	0.1511	0.3022	0.4905
ENSMUSG00000027671	Actl6a	none	47.823	-0.0959667	0.805223	NA	73.0838	0.42223	0.0915111	0.492469	44.0073	0.0555028	0.845837	0.994132	66.9367	0.55102	0.0236782	0.10524	57.4118	-0.250029	0.601106	0.847206	TRUE	-0.1994	0.2373	0.9954	TRUE	0.3851	0.007458	0.02899
ENSMUSG00000029712	Actl6b	none	490.871	0.0492733	0.7416	0.92683	590.648	-0.15784	0.197588	0.666606	134.143	0.107843	0.563028	0.981275	75.3982	0.0224734	0.92458	0.971511	13.5662	-1.88358	0.0310829	0.161498	TRUE	-0.139	0.1424	0.9464	TRUE	-0.4564	1.73e-07	1.924e-06
ENSMUSG00000015143	Actn1	none	592.796	-0.0716957	0.638378	0.8806	787.146	0.0584292	0.648563	0.928947	66.5025	-0.141427	0.584176	0.985423	134.435	0.19648	0.375154	0.621382	67.9184	-0.955038	0.0278444	0.149145	TRUE	0.06992	0.457	0.9999	TRUE	0.1231	0.1817	0.3435
ENSMUSG00000052374	Actn2	none	65.558	-0.2264	0.510311	NA	90.2042	-0.16649	0.506855	0.879679	9.54468	0.0334358	0.956183	0.995891	8.39684	0.154184	0.800753	0.911898	5.10063	-3.40032	0.0290622	0.153475	TRUE	0.02794	0.8847	0.9999	TRUE	-0.3234	0.03765	0.1067
ENSMUSG00000006457	Actn3	none	6.40654	0.0295858	0.977136	NA	NA	NA	NA	NA	4.27801	-0.22445	0.792328	0.994132	NA	NA	NA	NA	NA	NA	NA	NA	TRUE	-0.2888	0.5278	0.9999	TRUE	0.4962	0.1426	0.2882
ENSMUSG00000054808	Actn4	none	486.55	-0.0684722	0.675262	0.900306	423.221	0.0556871	0.673663	0.935363	116.153	0.0928415	0.651383	0.991361	210.348	0.396277	0.0306309	0.126676	179.882	0.498099	0.0943503	0.337772	TRUE	-0.08558	0.4224	0.9999	TRUE	0.04726	0.6004	0.7574
ENSMUSG00000021076	Actr10	none	1432.25	-0.165088	0.171889	0.546662	1618.67	0.10489	0.37286	0.813064	868.264	0.216259	0.0777547	0.703411	687.921	0.276244	0.0657032	0.212935	170.566	-0.176835	0.56621	0.829396	TRUE	-0.03976	0.6563	0.9999	TRUE	-0.2279	0.007113	0.02793
ENSMUSG00000025228	Actr1a	none	1321.75	0.179642	0.135177	0.494568	1360.97	-0.153136	0.120968	0.552933	674.011	0.20625	0.101838	0.759885	642.193	0.188372	0.18063	0.407631	214.866	0.0180903	0.948677	0.987513	TRUE	0.02537	0.7857	0.9999	TRUE	-0.1831	0.05076	0.1344
ENSMUSG00000037351	Actr1b	none	1752.07	0.135284	0.224229	0.613806	1183.29	0.0728724	0.487484	0.872589	638.492	0.216589	0.124201	0.795283	488.518	0.49919	0.000675389	0.00623262	155.366	-0.2541	0.401812	0.721374	TRUE	-0.09034	0.3547	0.9999	TRUE	-0.07009	0.4863	0.6666
ENSMUSG00000020152	Actr2	none	2306.05	0.169074	0.124521	0.481496	4351.4	0.110952	0.340746	0.789096	1245.44	-0.024353	0.837237	0.994132	1179.86	0.398617	0.00442352	0.0294407	1497.74	0.13049	0.528417	0.811141	TRUE	-0.07721	0.493	0.9999	TRUE	-0.1618	0.1711	0.3291
ENSMUSG00000026341	Actr3	none	296.39	-0.00113207	0.994929	0.999806	780.918	0.230277	0.0584949	0.401743	147.052	-0.0656886	0.75994	0.994132	158.081	0.285648	0.124003	0.323868	292.752	0.698171	0.00697035	0.0557202	TRUE	-0.04972	0.6066	0.9999	TRUE	-0.02606	0.8177	0.8999
ENSMUSG00000056367	Actr3b	none	657.133	-0.174048	0.219813	0.606812	1227.01	-0.197369	0.0869049	0.481968	168.271	0.0657967	0.726152	0.993949	287.005	-0.545038	0.00225475	0.0169593	50.8768	1.01517	0.0336065	0.170156	TRUE	-0.296	0.001828	0.1441	TRUE	-0.4746	3.681e-07	3.931e-06
ENSMUSG00000037761	Actr5	none	29.2353	0.373764	0.45775	NA	17.7982	0.430042	0.395159	0.827037	10.1483	0.203181	0.724624	0.993823	11.7498	-0.710522	0.181009	0.408123	15.1822	0.187441	0.812093	0.941512	TRUE	-0.06606	0.7608	0.9999	TRUE	0.1665	0.376	0.5655
ENSMUSG00000019948	Actr6	none	145.782	-0.672617	0.00602032	0.10278	255.353	0.0481626	0.742485	0.952226	101.889	-0.0743065	0.759027	0.994132	93.6092	-0.243808	0.267077	0.514061	41.2997	-0.820406	0.0976456	0.343758	TRUE	0.09263	0.5333	0.9999	TRUE	-0.1111	0.4001	0.5885
ENSMUSG00000015971	Actr8	none	438.843	-0.0126862	0.936798	0.985047	497.067	0.250825	0.0350741	0.306589	269.713	0.0851165	0.561165	0.980439	168.217	-0.353511	0.0612732	0.202637	66.4789	0.28714	0.524321	0.808354	TRUE	-0.05468	0.5881	0.9999	TRUE	-0.1084	0.2716	0.4553
ENSMUSG00000037737	Actrt3	none	6.05671	0.799661	0.456657	NA	NA	NA	NA	NA	8.62543	-0.127867	0.832692	0.994132	NA	NA	NA	NA	NA	NA	NA	NA	NA	NA	NA	NA	NA	NA	NA	NA
ENSMUSG00000026836	Acvr1	none	264.497	-0.141813	0.482966	0.800932	502.879	0.281769	0.0461868	0.3546	151.273	-0.201017	0.267783	0.922347	305.75	0.195943	0.25127	0.497314	122.654	-0.336813	0.301866	0.636803	TRUE	-0.08047	0.4736	0.9999	TRUE	0.1024	0.4377	0.6234
ENSMUSG00000000532	Acvr1b	none	838.018	0.0969418	0.460392	0.788037	610.951	-0.157765	0.194731	0.663231	317.919	-0.235325	0.11958	0.789975	392.881	0.228598	0.154904	0.372838	84.6356	-0.40268	0.313483	0.647499	TRUE	-0.1147	0.2379	0.9954	TRUE	-0.07612	0.4107	0.5988
ENSMUSG00000026834	Acvr1c	none	170.963	-0.518909	0.0190967	0.186106	245.11	0.899794	1.3936e-08	3.68216e-06	37.0426	-0.944602	0.00813014	0.323408	125.7	-0.876699	0.000167027	0.00191064	10.0591	-2.50169	0.0140049	0.0913153	TRUE	-0.04942	0.7477	0.9999	TRUE	0.7353	5.44e-06	4.8e-05
ENSMUSG00000052155	Acvr2a	none	430.357	-0.140738	0.36976	0.729758	498.234	-0.266519	0.0556323	0.392616	142.321	-0.494423	0.0118059	0.37592	455.764	-0.509716	0.00228065	0.0171001	41.0515	-0.485412	0.345016	0.676982	TRUE	0.1362	0.2856	0.9999	TRUE	-0.3345	0.008067	0.03092
ENSMUSG00000061393	Acvr2b	none	16.2273	-0.0733481	0.914558	NA	5.13037	-0.375874	0.663828	NA	11.1039	0.0760004	0.888051	0.994132	14.2855	-0.862346	0.0752957	0.234137	NA	NA	NA	NA	TRUE	-0.08533	0.7973	0.9999	TRUE	0.2334	0.3823	0.5712
ENSMUSG00000000530	Acvrl1	none	22.8183	-0.494865	0.376331	NA	NA	NA	NA	NA	NA	NA	NA	NA	10.1743	-0.170905	0.757971	0.891178	110.039	0.954382	0.00621802	0.0510066	TRUE	-0.1457	0.3825	0.9999	TRUE	0.1116	0.3931	0.5813
ENSMUSG00000023262	Acy1	none	52.4005	-0.033078	0.931708	NA	19.652	0.392636	0.403179	0.830874	17.7248	0.0272191	0.950202	0.995591	49.8033	-0.145825	0.589844	0.789065	18.5483	-2.34328	0.00204791	0.0217744	TRUE	-0.1421	0.5023	0.9999	TRUE	0.2642	0.1275	0.2657
ENSMUSG00000024866	Acy3	none	7.33026	-0.00339337	0.997175	NA	NA	NA	NA	NA	NA	NA	NA	NA	13.6153	1.85254	0.000473739	0.00461645	NA	NA	NA	NA	TRUE	-0.0087	0.9825	0.9999	TRUE	0.9336	0.001998	0.009501
ENSMUSG00000008822	Acyp1	none	278.362	-0.428784	0.0196905	0.188533	376.062	0.33338	0.0406858	0.332133	436.562	0.211311	0.164717	0.845874	283.107	0.2311	0.15542	0.373423	42.7144	-0.0901217	0.861859	0.960332	TRUE	0.0737	0.7025	0.9999	TRUE	0.06436	0.7226	0.8419
ENSMUSG00000060923	Acyp2	none	168.415	0.0829626	0.707657	0.915024	136.695	-0.0821548	0.662308	0.933754	397.117	-0.105304	0.46443	0.970586	400.898	0.271031	0.0865656	0.257246	17.1223	-0.394238	0.603702	0.848129	TRUE	0.1011	0.5787	0.9999	TRUE	-0.03351	0.8358	0.9109
ENSMUSG00000027259	Adal	none	75.2688	-0.429122	0.171494	NA	85.5097	0.0881196	0.695292	0.941077	95.0521	-0.150026	0.48337	0.973802	93.0338	-0.458984	0.0392092	0.151171	23.3714	-0.189296	0.771499	0.926459	TRUE	0.4647	0.001353	0.1199	TRUE	-0.122	0.3847	0.5733
ENSMUSG00000054693	Adam10	none	640.835	-0.211296	0.126194	0.482731	1016.36	0.050923	0.662271	0.933754	419.153	-0.341572	0.0907288	0.732746	1151.79	-0.0923163	0.518509	0.73975	1624.86	0.600894	0.00271485	0.0272218	TRUE	0.08267	0.3706	0.9999	TRUE	0.1167	0.268	0.4511
ENSMUSG00000020926	Adam11	none	557.923	-0.0402802	0.778702	0.941	725.706	-0.465168	9.28203e-05	0.00609938	311.171	-0.341288	0.0473906	0.596544	392.316	-0.497322	0.00623899	0.0388252	23.1133	-1.52341	0.0426261	0.198927	TRUE	-0.1178	0.3775	0.9999	TRUE	-0.1341	0.3923	0.5807
ENSMUSG00000028041	Adam15	none	238.175	-0.0645345	0.743106	0.927282	157.606	-0.0560519	0.757514	0.955215	193.833	-0.140679	0.394333	0.957654	249.241	0.484522	0.00729576	0.0436706	380.704	-0.295282	0.229331	0.55523	TRUE	-0.0037	0.9743	0.9999	TRUE	0.3295	0.007636	0.02953
ENSMUSG00000052593	Adam17	none	23.8383	0.338908	0.531067	NA	22.8291	0.51128	0.256361	0.723763	35.3773	-0.574205	0.119902	0.790356	293.163	0.00342854	0.984005	0.992506	1065.58	0.980495	3.41804e-06	9.51859e-05	TRUE	0.3287	0.01791	0.4803	TRUE	0.8876	1.261e-10	2.004e-09
ENSMUSG00000031552	Adam18	none	11.5112	-0.651066	0.407422	NA	9.95804	-0.677346	0.292884	NA	NA	NA	NA	NA	4.84067	1.03499	0.23629	0.478413	NA	NA	NA	NA	TRUE	-0.3653	0.3192	0.9999	TRUE	-0.08135	0.8095	0.8946
ENSMUSG00000011256	Adam19	none	66.7506	-0.591499	0.0829417	NA	33.1113	-0.0637835	0.863828	0.977112	38.8042	-0.750789	0.0171902	0.4354	31.2716	-0.171856	0.640852	0.82266	NA	NA	NA	NA	TRUE	0.09522	0.468	0.9999	TRUE	-0.6763	6.587e-07	6.752e-06
ENSMUSG00000040537	Adam22	none	2029.84	-0.0703218	0.517706	0.82	2115.37	0.0045003	0.968962	0.993322	1392.72	-0.265331	0.0881589	0.731814	1243.69	-0.190233	0.253905	0.500519	102.418	-1.29782	0.00308187	0.0301089	TRUE	-0.006337	0.9462	0.9999	TRUE	-0.1252	0.2483	0.428
ENSMUSG00000025964	Adam23	none	1158.87	-0.184532	0.132563	0.49274	781.135	-0.271819	0.0315793	0.289669	2360.88	-0.501991	0.000768431	0.104871	759.678	0.00972232	0.950328	0.980822	101.132	-1.66964	0.0810843	0.305245	TRUE	-0.1721	0.06934	0.8153	TRUE	-0.1577	0.08466	0.1965
ENSMUSG00000027318	Adam33	none	4.8903	-0.81288	0.489963	NA	NA	NA	NA	NA	NA	NA	NA	NA	NA	NA	NA	NA	7.26415	3.20341	0.0306799	0.159893	TRUE	-1.976	7.575e-07	0.0005705	TRUE	-0.734	0.06792	0.1665
ENSMUSG00000031555	Adam9	none	296.437	-0.136042	0.44011	0.775491	241.032	0.00946832	0.956353	0.991736	258.124	-0.395346	0.0210975	0.453085	597.347	0.763309	1.97774e-06	3.81029e-05	424.17	0.767582	0.00127119	0.0151296	TRUE	0.01281	0.8936	0.9999	TRUE	0.496	7.524e-08	8.814e-07
ENSMUSG00000022893	Adamts1	none	30.7903	0.793569	0.103415	NA	92.5142	-0.516554	0.044816	0.349957	125.673	0.377853	0.126898	0.798348	749.916	1.50523	3.42396e-18	2.55919e-16	27.0465	1.57243	0.0244802	0.135208	TRUE	0.02301	0.9056	0.9999	TRUE	0.3243	0.02987	0.08857
ENSMUSG00000014852	Adamts13	none	7.2039	0.204619	0.833127	NA	4.18829	0.392174	0.717568	NA	NA	NA	NA	NA	3.63122	-0.842082	0.390664	0.636077	NA	NA	NA	NA	TRUE	0.1125	0.8323	0.9999	TRUE	0.101	0.801	0.8894
ENSMUSG00000033453	Adamts15	none	6.42626	-0.498953	0.627692	NA	3.94222	0.304935	0.757979	NA	55.0341	-0.482114	0.0853867	0.723123	10.2881	-0.0948324	0.870641	0.946993	NA	NA	NA	NA	TRUE	0.0422	0.8531	0.9999	TRUE	-0.7256	0.004241	0.01813
ENSMUSG00000058145	Adamts17	none	11.3359	-0.0661804	0.93271	NA	13.7114	0.540559	0.330945	0.781054	15.1816	-0.456864	0.34399	0.950864	8.31588	0.695572	0.266428	0.513574	NA	NA	NA	NA	TRUE	-0.1716	0.4403	0.9999	TRUE	-0.1694	0.446	0.6302
ENSMUSG00000053399	Adamts18	none	NA	NA	NA	NA	NA	NA	NA	NA	NA	NA	NA	NA	NA	NA	NA	NA	NA	NA	NA	NA	TRUE	-0.274	0.4741	0.9999	TRUE	0.6571	0.08242	0.1928
ENSMUSG00000036545	Adamts2	none	46.2194	0.526968	0.182986	NA	31.7244	-1.27786	0.000552434	0.0235271	99.478	-0.00808362	0.971098	0.997323	55.5328	-0.292355	0.271441	0.519031	4.56534	-1.67896	0.233994	0.561276	TRUE	0.6803	0.009109	0.3509	TRUE	-0.2353	0.5073	0.6846
ENSMUSG00000022449	Adamts20	none	10.4417	0.540511	0.50798	NA	20.7682	-0.67939	0.129807	0.568852	6.95963	-0.646746	0.342736	0.950864	40.4346	0.392825	0.186842	0.416708	NA	NA	NA	NA	TRUE	-0.01854	0.8815	0.9999	TRUE	0.3517	0.005543	0.02275
ENSMUSG00000043635	Adamts3	none	193.842	-0.0694998	0.748085	0.927999	286.377	-0.0545317	0.707889	0.943358	619.751	-0.580826	0.000669403	0.0989793	109.753	-0.372863	0.079575	0.243049	14.6526	-1.28492	0.109595	0.36848	TRUE	-0.3903	0.0014	0.1228	TRUE	-0.04306	0.7225	0.8419
ENSMUSG00000006403	Adamts4	none	30.8004	0.566975	0.245159	NA	4.58909	-1.19003	0.2312	NA	280.793	-0.694833	0.000369994	0.0710389	139.838	2.92983	9.79371e-33	1.81578e-30	16.7308	-0.666869	0.396036	0.716375	TRUE	0.196	0.1929	0.9878	TRUE	0.4402	0.004935	0.02071
ENSMUSG00000022894	Adamts5	none	NA	NA	NA	NA	NA	NA	NA	NA	5.82001	-0.300512	0.683994	0.991399	16.353	1.62527	0.000582643	0.00551214	NA	NA	NA	NA	TRUE	-0.05434	0.8653	0.9999	TRUE	0.5894	0.06191	0.1555
ENSMUSG00000031994	Adamts8	none	8.77978	-0.3654	0.701522	NA	16.8377	0.645964	0.205471	0.675189	60.4762	-0.794719	0.00299524	0.21406	8.7515	-1.45406	0.0188963	0.0891487	NA	NA	NA	NA	TRUE	0.05321	0.8444	0.9999	TRUE	0.1974	0.423	0.6103
ENSMUSG00000030022	Adamts9	none	NA	NA	NA	NA	25.3962	-0.365014	0.410599	0.834008	4.12783	0.491404	0.575885	0.983338	44.4228	-0.146749	0.619486	0.808797	NA	NA	NA	NA	TRUE	0.1714	0.4512	0.9999	TRUE	0.01906	0.9045	0.9515
ENSMUSG00000066113	Adamtsl1	none	28.7087	0.231802	0.642728	NA	41.4001	-0.30325	0.347243	0.795282	14.2422	0.0797219	0.868604	0.994132	81.2918	1.71337	5.66446e-11	2.25882e-09	8.26345	-0.960431	0.360056	0.690396	TRUE	0.1491	0.4107	0.9999	TRUE	0.01306	0.9418	0.9719
ENSMUSG00000036040	Adamtsl2	none	37.5867	0.287136	0.517681	NA	10.3491	-0.185173	0.76984	NA	NA	NA	NA	NA	31.958	1.23435	0.000629666	0.00589837	20.116	-1.82626	0.00933299	0.06812	TRUE	-0.4744	0.09611	0.8756	TRUE	-0.2604	0.2429	0.4221
ENSMUSG00000070469	Adamtsl3	none	6.8442	1.00421	0.322205	NA	NA	NA	NA	NA	8.64509	-0.443997	0.50552	0.977729	176.792	2.86803	7.37509e-39	1.84714e-36	NA	NA	NA	NA	TRUE	-0.2518	0.4598	0.9999	TRUE	3.009	4.097e-30	2.284e-28
ENSMUSG00000015850	Adamtsl4	none	5.8721	0.994727	0.361219	NA	NA	NA	NA	NA	7.60429	-1.06576	0.119501	0.789975	90.9401	3.98285	5.96173e-34	1.23347e-31	8.3511	-0.551153	0.622445	0.858539	TRUE	-0.1366	0.5047	0.9999	TRUE	1.663	1.273e-22	4.761e-21
ENSMUSG00000043822	Adamtsl5	none	5.17235	0.783003	0.498428	NA	NA	NA	NA	NA	31.7277	0.365691	0.329494	0.947187	42.6259	1.19349	0.00024512	0.002645	NA	NA	NA	NA	TRUE	-0.07663	0.7888	0.9999	TRUE	1.004	0.0001089	0.0007434
ENSMUSG00000056413	Adap1	none	473.961	0.319242	0.0510971	0.32181	236.257	-0.155278	0.306792	0.761918	182.321	0.190842	0.272246	0.924628	92.8174	-0.057828	0.787765	0.90534	43.9818	0.390231	0.445783	0.757262	TRUE	-0.0579	0.6261	0.9999	TRUE	-0.1498	0.1459	0.2932
ENSMUSG00000027951	Adar	none	1600.07	-0.0561321	0.637276	0.880501	1159.05	-0.14463	0.179378	0.642807	525.444	-0.0507806	0.740724	0.994132	217.998	-0.542068	0.00235144	0.017493	123.766	0.230696	0.487393	0.786326	TRUE	0.09932	0.3329	0.9999	TRUE	-0.1622	0.1022	0.2258
ENSMUSG00000020262	Adarb1	none	437.89	-0.064602	0.685388	0.90307	373.126	-0.252929	0.0772688	0.462856	694.706	-0.0484911	0.696964	0.992723	134.71	-0.0488144	0.806459	0.914925	33.5503	-0.759963	0.190699	0.508381	TRUE	-0.0305	0.7716	0.9999	TRUE	-0.3671	0.0002626	0.001609
ENSMUSG00000052551	Adarb2	none	24.1795	0.33694	0.534146	NA	36.7862	0.0799609	0.808942	0.968072	69.1181	0.213842	0.388431	0.957654	11.1244	0.0925327	0.867502	0.944982	9.97887	-2.95366	0.00619679	0.0508674	TRUE	-0.07037	0.646	0.9999	TRUE	-0.362	0.01427	0.04906
ENSMUSG00000031949	Adat1	none	24.6641	0.177347	0.746864	NA	33.6223	-0.0517354	0.88269	0.980035	23.5313	0.0473871	0.897963	0.994132	12.7711	-0.199598	0.685032	0.847518	4.77197	-0.342584	0.819832	0.94384	TRUE	0.1582	0.3776	0.9999	TRUE	-0.2059	0.2648	0.4476
ENSMUSG00000019808	Adat2	none	43.7771	-0.806985	0.0583427	NA	53.773	-0.0533371	0.848138	0.975511	21.4419	0.0832812	0.838475	0.994132	40.8339	0.181559	0.547391	0.760041	12.8972	0.167385	0.847956	0.956602	TRUE	0.1578	0.4825	0.9999	TRUE	-0.1196	0.5382	0.7082
ENSMUSG00000021044	Adck1	none	160.714	0.517061	0.0243181	0.21622	176.773	0.0373067	0.821888	0.97041	75.5314	0.132398	0.568035	0.982927	93.3376	-0.223316	0.291702	0.542939	31.1563	-0.313991	0.57617	0.832646	TRUE	0.0002521	0.9982	0.9999	TRUE	-0.02572	0.8031	0.8904
ENSMUSG00000046947	Adck2	none	61.357	0.534915	0.132653	NA	59.6963	-0.191498	0.468015	0.862246	48.7743	0.349529	0.229231	0.902699	36.8705	-0.0264908	0.935839	0.976112	20.5389	-0.443228	0.521164	0.805602	TRUE	-0.06832	0.6069	0.9999	TRUE	0.07009	0.5689	0.7332
ENSMUSG00000022550	Adck5	none	29.7395	0.0981076	0.841845	NA	27.3142	0.127146	0.742959	0.952257	14.6204	0.326603	0.496816	0.977337	13.3562	-0.171893	0.728625	0.87444	10.3629	-0.321197	0.737156	0.911428	TRUE	-0.1862	0.2629	0.9999	TRUE	-0.02344	0.8587	0.9259
ENSMUSG00000020431	Adcy1	none	574.013	0.173744	0.320158	0.695168	688.048	-0.0605856	0.617559	0.919014	452.934	-0.258021	0.0690819	0.676058	153.382	-0.56615	0.0141622	0.0719681	56.3682	-2.5623	1.29845e-06	4.09423e-05	TRUE	-0.1131	0.4612	0.9999	TRUE	-0.6317	0.0006941	0.003806
ENSMUSG00000026567	Adcy10	none	NA	NA	NA	NA	NA	NA	NA	NA	NA	NA	NA	NA	NA	NA	NA	NA	NA	NA	NA	NA	NA	NA	NA	NA	NA	NA	NA	NA
ENSMUSG00000021536	Adcy2	none	1023.24	-0.336392	0.00803813	0.121021	1204.28	-0.210727	0.062338	0.415318	204.384	-0.122461	0.472645	0.972545	1521.86	-1.04148	7.8679e-09	2.38983e-07	43.6949	-1.54485	0.00319193	0.0310002	TRUE	-0.1377	0.1737	0.9832	TRUE	-0.4964	2.647e-06	2.472e-05
ENSMUSG00000020654	Adcy3	none	390.773	-0.128989	0.431657	0.769891	370.531	-0.28142	0.0287556	0.273424	254.845	-0.0247762	0.876527	0.994132	270.638	-0.119249	0.522108	0.74158	72.5363	1.00487	0.0159422	0.100138	TRUE	0.08325	0.4568	0.9999	TRUE	-0.3075	0.002944	0.01327
ENSMUSG00000022840	Adcy5	none	342.163	-0.310642	0.404166	0.753099	85.4812	0.292719	0.214121	0.681366	63.2724	0.179201	0.46032	0.970586	86.6786	0.00794135	0.973421	0.989172	23.7771	-1.80473	0.00872	0.0650806	TRUE	-0.002735	0.9796	0.9999	TRUE	-0.3595	0.0006576	0.003631
ENSMUSG00000022994	Adcy6	none	110.181	0.341516	0.197055	0.580069	77.328	-0.153872	0.522321	0.884031	28.6688	-0.147461	0.6712	0.991361	116.21	0.0994024	0.625991	0.813667	12.835	-1.69263	0.0534472	0.231062	TRUE	0.1202	0.1837	0.9878	TRUE	-0.06805	0.4887	0.6684
ENSMUSG00000031659	Adcy7	none	10.6075	-0.0292152	0.971651	NA	NA	NA	NA	NA	12.2353	0.912552	0.0824858	0.715025	15.4557	0.537242	0.280408	0.530072	290.783	0.852579	0.0011636	0.0140801	TRUE	0.03743	0.862	0.9999	TRUE	2.485	2.783e-51	3.556e-49
ENSMUSG00000022376	Adcy8	none	179.85	-0.173522	0.425853	0.7667	174.58	-0.974572	2.57303e-07	4.18292e-05	189.682	-0.186429	0.266408	0.921583	275.734	-0.373109	0.0646309	0.210176	24.2056	-2.1991	0.000939706	0.01189	TRUE	-0.2653	0.1649	0.9742	TRUE	-0.7187	1.1e-07	1.255e-06
ENSMUSG00000005580	Adcy9	none	639.507	0.175337	0.224448	0.613922	1208.04	0.222841	0.0986802	0.509147	383.572	-0.184861	0.222638	0.897824	319.829	-0.0890624	0.641294	0.822713	65.4301	-0.665343	0.11854	0.387384	TRUE	-0.1356	0.1567	0.9616	TRUE	-0.09422	0.3227	0.5129
ENSMUSG00000024256	Adcyap1	none	249.504	-0.105058	0.597529	0.859784	46.9231	0.289421	0.448621	0.856321	93.7538	0.92516	4.81367e-05	0.0162955	175.576	-0.108738	0.618409	0.808314	NA	NA	NA	NA	TRUE	0.3969	0.1839	0.9878	TRUE	-0.4073	0.1883	0.353
ENSMUSG00000029778	Adcyap1r1	none	484.817	0.156098	0.308572	0.688113	482.798	-0.463888	0.00301899	0.0694525	443.691	-0.0678972	0.636098	0.991361	3832.86	-0.699917	5.89789e-05	0.000786899	48.7844	-1.07898	0.0526419	0.228243	TRUE	0.05228	0.6128	0.9999	TRUE	-0.1708	0.1402	0.2847
ENSMUSG00000029106	Add1	none	2549.6	0.130716	0.261498	0.651128	2577.28	0.11337	0.237524	0.707479	732.966	-0.106127	0.387474	0.957654	1037.58	-0.0550522	0.680023	0.844527	336.477	-0.454986	0.0696245	0.276531	TRUE	-0.007454	0.9478	0.9999	TRUE	-0.1614	0.1666	0.3226
ENSMUSG00000030000	Add2	none	1272.21	0.236855	0.0618347	0.351843	1467.31	0.218443	0.0229578	0.24551	302.977	0.0941327	0.579452	0.983491	204.381	-0.207448	0.278714	0.527796	31.0081	-1.71092	0.00275164	0.0274837	TRUE	-0.2092	0.02419	0.5365	TRUE	-0.364	0.0008052	0.004331
ENSMUSG00000025026	Add3	none	529.149	-0.186858	0.206049	0.591096	736.616	-0.0855109	0.427349	0.845095	443.943	-0.145689	0.259792	0.918876	2264.18	0.611478	6.91971e-07	1.48327e-05	215.92	-0.360986	0.195978	0.51553	TRUE	-0.02355	0.7927	0.9999	TRUE	1.138	8.336e-18	2.32e-16
ENSMUSG00000025475	Adgra1	none	373.155	0.319072	0.0542045	0.33056	185.708	-0.192342	0.281788	0.746575	121.653	0.0706712	0.710753	0.992723	266.311	-0.046442	0.777279	0.901317	14.0274	-0.816161	0.319717	0.652407	NA	NA	NA	NA	NA	NA	NA	NA
ENSMUSG00000031486	Adgra2	none	NA	NA	NA	NA	NA	NA	NA	NA	NA	NA	NA	NA	NA	NA	NA	NA	NA	NA	NA	NA	NA	NA	NA	NA	NA	NA	NA	NA
ENSMUSG00000029090	Adgra3	none	26.2693	0.238075	0.648196	NA	21.8786	-0.559048	0.192366	0.661587	87.1906	-0.328734	0.147647	0.828319	215.231	0.00453331	0.981733	0.991799	18.8274	-0.17777	0.801423	0.936718	NA	NA	NA	NA	NA	NA	NA	NA
ENSMUSG00000034730	Adgrb1	none	1183.17	-0.0473309	0.735374	0.924427	843.09	0.0303328	0.797127	0.965216	468.585	-0.118354	0.452761	0.967703	944.148	-0.529927	0.000125385	0.00148301	60.6073	-1.7785	0.000951513	0.0119885	NA	NA	NA	NA	NA	NA	NA	NA
ENSMUSG00000028782	Adgrb2	none	912.04	0.154797	0.242325	0.632228	1283.42	0.247682	0.0858962	0.481264	109.018	-0.201625	0.322659	0.943752	658.509	-0.11717	0.452366	0.688967	50.7222	-1.96576	0.000323887	0.00485585	NA	NA	NA	NA	NA	NA	NA	NA
ENSMUSG00000033569	Adgrb3	none	1129.81	-0.128481	0.30339	0.685066	1919.06	0.0225795	0.841866	0.972482	1247.89	-0.368622	0.0276538	0.496399	1351.33	-0.384209	0.00657932	0.0402945	70.9209	-1.3719	0.00899848	0.0666706	NA	NA	NA	NA	NA	NA	NA	NA
ENSMUSG00000044017	Adgrd1	none	28.8159	-0.239638	0.634171	NA	5.48409	-0.19346	0.829823	NA	3.10548	-0.490678	0.634973	0.991361	8.09578	0.652722	0.309265	0.559933	NA	NA	NA	NA	NA	NA	NA	NA	NA	NA	NA	NA
ENSMUSG00000004730	Adgre1	none	14.8656	2.43481	0.00288644	NA	4.56139	-0.0249952	0.97971	NA	5.53605	0.432677	0.602011	0.988825	18.8255	1.82331	8.68161e-05	0.0010968	3476.87	0.653198	0.000909931	0.0115623	NA	NA	NA	NA	NA	NA	NA	NA
ENSMUSG00000002885	Adgre5	none	6.88268	0.601856	0.566871	NA	NA	NA	NA	NA	11.4765	0.200794	0.707122	0.992723	445.78	0.62403	0.000324939	0.0033566	48.3422	0.336888	0.583998	0.837424	NA	NA	NA	NA	NA	NA	NA	NA
ENSMUSG00000023918	Adgrf4	none	9.50873	-1.09257	0.205502	NA	40.056	1.89506	2.99797e-07	4.5107e-05	NA	NA	NA	NA	4.10044	0.913875	0.322948	0.572792	NA	NA	NA	NA	NA	NA	NA	NA	NA	NA	NA	NA
ENSMUSG00000056492	Adgrf5	none	10.1304	0.190782	0.824914	NA	46.3712	0.28375	0.403201	0.830874	22.2867	-0.101435	0.799911	0.994132	25.1011	-0.150158	0.683548	0.84671	15.9842	-0.94861	0.220136	0.543728	NA	NA	NA	NA	NA	NA	NA	NA
ENSMUSG00000031785	Adgrg1	none	132.816	0.662648	0.0089561	0.127868	76.9157	0.391387	0.118545	0.548567	97.6578	0.17376	0.415638	0.958938	4267.88	-0.0811628	0.635621	0.820001	1578.28	-0.957772	2.11919e-06	6.25213e-05	NA	NA	NA	NA	NA	NA	NA	NA
ENSMUSG00000031298	Adgrg2	none	6.40675	-0.736708	0.471958	NA	18.3131	-0.0332138	0.943877	0.990159	14.1128	-0.497039	0.307775	0.939405	21.1068	-0.143678	0.720981	0.868895	NA	NA	NA	NA	NA	NA	NA	NA	NA	NA	NA	NA
ENSMUSG00000039116	Adgrg6	none	32.3844	0.206537	0.677467	NA	NA	NA	NA	NA	NA	NA	NA	NA	68.3867	1.24721	2.06227e-05	0.000308283	NA	NA	NA	NA	NA	NA	NA	NA	NA	NA	NA	NA
ENSMUSG00000013033	Adgrl1	none	2528.86	0.15808	0.181751	0.560407	1985.63	0.158916	0.136492	0.578263	882.596	-0.134174	0.299426	0.939405	1301.85	-0.175955	0.254554	0.501242	112.949	-2.23166	5.65147e-07	1.94682e-05	NA	NA	NA	NA	NA	NA	NA	NA
ENSMUSG00000028184	Adgrl2	none	738.742	-0.173546	0.212664	0.598211	635.067	-0.207445	0.111755	0.535189	646.422	-0.339409	0.0404599	0.566797	372.811	-0.3545	0.0578388	0.194826	129.928	-0.246175	0.481656	0.781189	NA	NA	NA	NA	NA	NA	NA	NA
ENSMUSG00000037605	Adgrl3	none	1620.33	-0.108941	0.344006	0.713572	1906.45	0.227047	0.0258635	0.263111	887.842	-0.146308	0.343792	0.950864	2726.13	-0.427791	0.00102257	0.00892315	81.0446	-1.09625	0.0209153	0.120956	NA	NA	NA	NA	NA	NA	NA	NA
ENSMUSG00000039167	Adgrl4	none	6.51369	0.492255	0.637182	NA	NA	NA	NA	NA	20.5163	-0.525084	0.197555	0.878819	8.01298	-0.215353	0.746783	0.884943	7.27211	-0.673586	0.565244	0.829348	NA	NA	NA	NA	NA	NA	NA	NA
ENSMUSG00000069170	Adgrv1	none	3.99526	0.213861	0.877227	NA	NA	NA	NA	NA	13.2871	0.222607	0.663919	0.991361	47.7219	1.09352	0.000152744	0.00176996	NA	NA	NA	NA	NA	NA	NA	NA	NA	NA	NA	NA
ENSMUSG00000028138	Adh5	none	326.944	0.199185	0.26527	0.653639	363.647	0.0657472	0.654891	0.931565	316.259	0.140969	0.356992	0.952967	435.447	-0.205151	0.219852	0.458459	196.968	0.178545	0.528473	0.811141	TRUE	0.04288	0.6696	0.9999	TRUE	0.2888	0.004147	0.01782
ENSMUSG00000025911	Adhfe1	none	10.6847	0.578752	0.482178	NA	NA	NA	NA	NA	10.8177	-1.04118	0.0659991	0.671327	336.098	-0.4513	0.00734044	0.0438644	NA	NA	NA	NA	TRUE	0.05545	0.6813	0.9999	TRUE	0.01489	0.9001	0.9492
ENSMUSG00000020629	Adi1	none	137.382	0.0418766	0.862291	0.96378	120.828	-0.177954	0.451987	0.856869	154.613	-0.141311	0.452209	0.967703	385.653	-0.00213097	0.989643	0.99494	146.024	0.845086	0.013008	0.0870536	TRUE	0.2417	0.04871	0.7189	TRUE	0.1736	0.1441	0.2905
ENSMUSG00000026457	Adipor1	none	191.507	0.0497394	0.819432	0.952325	149.101	-0.356809	0.0537958	0.384099	153.167	-0.109828	0.538698	0.979472	456.167	0.494284	0.0019867	0.0153558	352.227	0.182643	0.45641	0.763829	TRUE	0.06381	0.5108	0.9999	TRUE	0.5622	5.841e-10	8.697e-09
ENSMUSG00000030168	Adipor2	none	116.491	0.10109	0.709264	0.915277	75.4435	-0.171336	0.508389	0.880072	100.764	-0.3072	0.187491	0.86867	293.569	0.23532	0.169955	0.393301	132.291	0.0786466	0.812834	0.941659	TRUE	0.108	0.3723	0.9999	TRUE	0.5136	2.385e-05	0.0001867
ENSMUSG00000039197	Adk	none	348.398	0.13523	0.433444	0.770613	252.993	-0.0234721	0.892393	0.980844	516.796	0.168216	0.217973	0.895024	1413.11	0.246639	0.138342	0.346478	38.7856	-0.384797	0.450407	0.760816	TRUE	-0.05538	0.6027	0.9999	TRUE	0.6324	3.159e-10	4.83e-09
ENSMUSG00000030790	Adm	none	NA	NA	NA	NA	NA	NA	NA	NA	35.1202	-0.28723	0.370793	0.956332	23.7092	0.707441	0.0677319	0.217192	NA	NA	NA	NA	TRUE	-0.0422	0.9127	0.9999	TRUE	-0.1119	0.7326	0.848
ENSMUSG00000051149	Adnp	none	7.95226	0.486163	0.61394	NA	NA	NA	NA	NA	NA	NA	NA	NA	7.7641	-0.704792	0.304482	0.55557	8.69086	-0.897403	0.382767	0.706661	TRUE	-0.04406	0.641	0.9999	TRUE	-0.111	0.2495	0.4294
ENSMUSG00000053950	Adnp2	none	184.4	0.189803	0.375292	0.732933	214.448	0.210353	0.197825	0.667198	127.034	0.0570997	0.763377	0.994132	80.0976	0.211745	0.341906	0.591731	48.0151	0.101799	0.829875	0.948986	TRUE	0.01556	0.886	0.9999	TRUE	-0.284	0.01551	0.05239
ENSMUSG00000057134	Ado	none	123.761	0.276478	0.282739	0.669596	106.574	-0.0332677	0.885154	0.980844	84.7365	0.114664	0.61841	0.98964	59.2661	0.494219	0.0493736	0.176336	30.9647	0.0985021	0.864922	0.96092	TRUE	0.007029	0.9481	0.9999	TRUE	-0.239	0.02181	0.06898
ENSMUSG00000042429	Adora1	none	369.71	0.0746728	0.657817	0.892274	385.164	-0.0604398	0.672901	0.935111	128.691	0.229709	0.22484	0.898801	477.406	0.506694	0.00171132	0.0135126	16.7612	-0.790158	0.339321	0.671061	TRUE	-0.01024	0.9229	0.9999	TRUE	-0.06022	0.5868	0.7469
ENSMUSG00000020178	Adora2a	none	56.196	-1.16593	0.002142	NA	NA	NA	NA	NA	NA	NA	NA	NA	18.1781	-0.850837	0.0503763	0.178366	NA	NA	NA	NA	TRUE	-0.012	0.9739	0.9999	TRUE	0.1169	0.7248	0.8427
ENSMUSG00000025236	Adpgk	none	69.8341	0.208394	0.522313	NA	81.5229	-0.0169455	0.944298	0.990159	78.9298	-0.170639	0.442185	0.964931	144.17	-0.314856	0.139647	0.348349	31.8427	-0.0176985	0.974722	0.991864	TRUE	0.05302	0.7074	0.9999	TRUE	0.0753	0.5681	0.7326
ENSMUSG00000002844	Adprh	none	819.15	-0.0195726	0.880545	0.970044	974.561	-0.11904	0.266651	0.733001	526.489	0.0958895	0.47252	0.972545	528.2	-0.165489	0.257028	0.503822	205.101	-0.206362	0.461972	0.767742	TRUE	-0.1159	0.2778	0.9999	TRUE	0.0599	0.6031	0.7596
ENSMUSG00000042558	Adprhl2	none	57.0974	0.710847	0.048079	NA	46.204	0.0221666	0.94015	0.989562	31.2533	-0.0194985	0.952852	0.995591	34.9355	0.381121	0.262229	0.50942	22.5913	0.738593	0.271735	0.604107	TRUE	-0.004493	0.9775	0.9999	TRUE	0.1796	0.2808	0.4654
ENSMUSG00000020910	Adprm	none	47.2594	-0.0133849	0.972357	NA	48.2275	-0.00235823	0.993721	0.998738	39.2019	0.24835	0.4267	0.962425	41.92	-0.196755	0.502112	0.727521	14.2402	0.346855	0.669842	0.885226	NA	NA	NA	NA	NA	NA	NA	NA
ENSMUSG00000045875	Adra1a	none	48.2023	-0.734357	0.0564104	NA	29.9883	-0.218014	0.574002	0.905581	72.2277	-0.130154	0.584803	0.98543	169.309	-0.201	0.280798	0.530256	4.56534	-1.67896	0.233994	0.561276	TRUE	-0.2792	0.2753	0.9999	TRUE	0.1997	0.4045	0.5932
ENSMUSG00000050541	Adra1b	none	103.637	-0.0231909	0.932768	0.9845	NA	NA	NA	NA	26.5546	0.0670311	0.854721	0.994132	54.1556	-0.993884	0.000356673	0.00363965	NA	NA	NA	NA	TRUE	-0.3047	0.3	0.9999	TRUE	-0.5727	0.09481	0.2139
ENSMUSG00000027335	Adra1d	none	218.873	-0.385163	0.0656022	0.360339	254.703	-0.0392366	0.840308	0.972157	44.8112	-0.237603	0.415841	0.958938	48.3719	-0.245167	0.373329	0.620121	NA	NA	NA	NA	TRUE	0.08979	0.5921	0.9999	TRUE	-0.1996	0.1306	0.2706
ENSMUSG00000033717	Adra2a	none	41.708	0.54944	0.188031	NA	21.6796	-0.237746	0.60037	0.913394	19.0562	0.615839	0.135514	0.812669	127.021	-0.276001	0.174092	0.399518	4.28504	-1.74504	0.229012	0.554909	TRUE	0.01609	0.9332	0.9999	TRUE	0.1169	0.5614	0.7267
ENSMUSG00000045318	Adra2c	none	11.2874	0.332044	0.667951	NA	12.7043	0.443375	0.440996	0.852909	NA	NA	NA	NA	4.36187	-0.138619	0.866537	0.944518	NA	NA	NA	NA	TRUE	0.04294	0.8073	0.9999	TRUE	-0.01629	0.9154	0.9571
ENSMUSG00000035283	Adrb1	none	57.4875	-0.330733	0.356809	NA	20.5504	-0.491089	0.271983	0.739032	10.5191	0.64401	0.261001	0.918876	34.9336	0.0288413	0.93288	0.97452	8.36166	-0.263821	0.808539	0.939896	TRUE	-0.1984	0.3478	0.9999	TRUE	-0.2925	0.08235	0.1927
ENSMUSG00000045730	Adrb2	none	6.64984	1.46791	0.172964	NA	NA	NA	NA	NA	11.4358	0.140541	0.793458	0.994132	NA	NA	NA	NA	97.581	-1.0353	0.00357	0.0338425	TRUE	-0.2151	0.5307	0.9999	TRUE	0.4296	0.1353	0.2775
ENSMUSG00000031489	Adrb3	none	NA	NA	NA	NA	NA	NA	NA	NA	NA	NA	NA	NA	NA	NA	NA	NA	NA	NA	NA	NA	TRUE	-0.1223	0.8283	0.9999	TRUE	0.04106	0.9228	0.9616
ENSMUSG00000039041	Adrm1	none	47.1413	0.0483468	0.903729	NA	43.5885	-0.369939	0.277134	0.74343	39.7822	-0.195377	0.562747	0.981051	26.9264	0.0448798	0.896873	0.959155	21.5841	-0.217019	0.764021	0.922824	TRUE	-0.156	0.2686	0.9999	TRUE	0.2178	0.1038	0.2285
ENSMUSG00000022407	Adsl	none	151.83	0.02445	0.915052	0.979677	115.79	0.0183669	0.931811	0.988347	124.882	0.324318	0.0839988	0.719513	93.4132	-0.234267	0.284213	0.534505	44.4286	-0.178316	0.7295	0.90951	TRUE	0.02326	0.8596	0.9999	TRUE	0.01572	0.895	0.9461
ENSMUSG00000015961	Adss	none	415.293	-0.354306	0.0520175	0.324472	667.11	-0.0864735	0.440996	0.852909	339.218	0.281629	0.0638653	0.665013	215.104	0.19128	0.299425	0.55092	93.8611	0.248727	0.513965	0.801826	TRUE	-0.05133	0.582	0.9999	TRUE	-0.2126	0.01999	0.06435
ENSMUSG00000011148	Adssl1	none	58.77	0.139866	0.690203	NA	10.4729	0.131731	0.833228	NA	109.574	0.459448	0.0552714	0.632818	24.6488	1.00497	0.00703007	0.0424181	98.9131	1.98991	2.42369e-07	9.31871e-06	TRUE	-0.2345	0.2462	0.9999	TRUE	0.9512	1.853e-13	3.814e-12
ENSMUSG00000020473	Aebp1	none	33.93	1.18079	0.0117474	NA	NA	NA	NA	NA	21.0502	1.01658	0.0219131	0.458357	650.537	2.53369	4.79047e-41	1.39569e-38	16.9352	-1.30196	0.0960301	0.340548	TRUE	0.176	0.4775	0.9999	TRUE	2.616	7.884e-43	7.509e-41
ENSMUSG00000030232	Aebp2	none	210.047	-0.0237537	0.906409	0.977701	236.735	-0.104322	0.508399	0.880072	280.093	-0.391871	0.0258343	0.485157	226.288	0.0147374	0.928823	0.973116	157.878	0.481537	0.115309	0.38145	TRUE	0.08432	0.4286	0.9999	TRUE	-0.1185	0.2243	0.4
ENSMUSG00000030609	Aen	none	62.7267	0.345362	0.310908	NA	42.6897	-0.116671	0.702393	0.942708	67.3674	-0.197055	0.471843	0.972154	96.635	0.477596	0.0362217	0.14352	15.0373	0.188048	0.816626	0.942425	TRUE	0.06776	0.7083	0.9999	TRUE	0.2756	0.05227	0.1371
ENSMUSG00000065022	AF357341	none	9.28455	-0.366479	0.670786	NA	5.37521	1.81164	0.0735336	NA	8.83979	0.372982	0.557657	0.980439	15.1744	0.636813	0.176697	0.402637	NA	NA	NA	NA	NA	NA	NA	NA	NA	NA	NA	NA
ENSMUSG00000065749	AF357428	none	271.363	0.0765763	0.919717	0.980345	24.8897	0.114969	0.794715	0.964611	63.3392	0.739796	0.0128544	0.387264	88.1512	1.10612	1.6384e-05	0.000252318	20.8777	-0.111615	0.876814	0.967393	NA	NA	NA	NA	NA	NA	NA	NA
ENSMUSG00000029094	Afap1	none	19.6385	0.542355	0.365709	NA	15.1914	-0.278617	0.60157	0.913926	44.734	-0.0968988	0.732239	0.994132	84.6842	0.0392799	0.86001	0.941277	28.2385	0.228633	0.714202	0.90511	TRUE	-0.02418	0.8298	0.9999	TRUE	-0.01544	0.8876	0.9415
ENSMUSG00000033032	Afap1l1	none	62.5162	0.592619	0.128796	NA	3.46318	-0.425342	0.70029	NA	4.52466	0.00777701	0.993068	0.997991	6.45873	-0.229719	0.732999	0.8767	29.7538	-0.471249	0.40903	0.726779	TRUE	-0.1768	0.2295	0.9954	TRUE	-0.04505	0.7673	0.8694
ENSMUSG00000025083	Afap1l2	none	6.6403	0.863841	0.41686	NA	11.0064	-0.462053	0.43351	NA	72.6793	-0.00496536	0.982705	0.997323	110.845	1.20809	4.27629e-08	1.14969e-06	NA	NA	NA	NA	TRUE	0.033	0.8408	0.9999	TRUE	0.8569	2.394e-09	3.334e-08
ENSMUSG00000068036	Afdn	none	665.329	-0.169018	0.243018	0.633058	603.976	-0.377349	0.00214905	0.0563373	176.989	0.16902	0.34365	0.950864	119.836	-0.36304	0.096231	0.275017	64.5966	-0.274795	0.538611	0.817516	NA	NA	NA	NA	NA	NA	NA	NA
ENSMUSG00000029313	Aff1	none	61.5509	0.16974	0.621386	NA	63.9446	0.545109	0.0357283	0.308648	231.34	-0.0707959	0.677396	0.991399	119.13	0.472804	0.0492891	0.176221	92.3486	-0.117292	0.768528	0.925207	TRUE	0.07184	0.5748	0.9999	TRUE	0.5726	6.002e-08	7.146e-07
ENSMUSG00000031189	Aff2	none	249.194	-0.204696	0.291583	0.676485	209.416	-0.112584	0.549198	0.89718	314.991	0.0802125	0.58476	0.98543	79.7533	0.117382	0.630806	0.816815	11.0084	-0.897896	0.338858	0.670716	TRUE	0.02084	0.9198	0.9999	TRUE	-0.1391	0.4323	0.6185
ENSMUSG00000037138	Aff3	none	361.329	-0.336801	0.0526894	0.326077	524.081	0.0426991	0.71831	0.946536	143.69	-0.0772611	0.683007	0.991399	87.4743	-0.206	0.40943	0.652128	15.0649	-3.46597	0.000367428	0.00541332	TRUE	-0.02496	0.804	0.9999	TRUE	-0.2892	0.002908	0.01312
ENSMUSG00000049470	Aff4	none	1335.44	-0.251256	0.0325978	0.25507	1779.64	-0.00595522	0.957125	0.991736	770.193	0.150402	0.205834	0.88643	684.597	-0.199566	0.154751	0.37263	191.294	0.213402	0.457456	0.764286	TRUE	0.179	0.08906	0.8588	TRUE	0.009305	0.9311	0.9664
ENSMUSG00000038302	Afg1l	none	70.6987	-0.150826	0.639011	NA	77.2149	-0.31606	0.182186	0.648578	38.2771	-0.00650556	0.982891	0.997323	69.7368	-0.0839697	0.72947	0.874734	10.3012	-0.399549	0.673791	0.886967	NA	NA	NA	NA	NA	NA	NA	NA
ENSMUSG00000031967	Afg3l1	none	38.986	-0.349685	0.431979	NA	42.1368	0.168413	0.605244	0.915692	25.6864	0.247653	0.500068	0.977337	70.5009	0.726847	0.00384844	0.026212	27.3205	0.406386	0.50727	0.798277	TRUE	-0.06803	0.5229	0.9999	TRUE	0.2059	0.05416	0.1408
ENSMUSG00000024527	Afg3l2	none	609.745	-0.154878	0.273537	0.661761	582.958	-0.153497	0.258248	0.72458	352.386	0.0252583	0.857893	0.994132	178.547	0.26549	0.142105	0.352019	77.255	-0.0757557	0.846582	0.956075	TRUE	-0.04555	0.613	0.9999	TRUE	-0.009223	0.9146	0.9567
ENSMUSG00000017718	Afmid	none	NA	NA	NA	NA	NA	NA	NA	NA	NA	NA	NA	NA	4.95565	0.201837	0.801541	0.912247	NA	NA	NA	NA	TRUE	-0.2382	0.4026	0.9999	TRUE	0.7867	0.001747	0.008454
ENSMUSG00000049659	Aftph	none	643.597	-0.252973	0.0962496	0.426126	757.043	0.0281233	0.810316	0.968146	643.204	-0.0685303	0.624479	0.990737	467.75	-0.213762	0.162237	0.382386	306.821	0.0305839	0.905571	0.977855	TRUE	0.02828	0.7645	0.9999	TRUE	-0.04789	0.6425	0.7864
ENSMUSG00000031521	Aga	none	48.2891	0.271465	0.483368	NA	38.1991	0.0436669	0.896492	0.981872	94.4325	0.0851489	0.699195	0.992723	407.767	-0.331524	0.0587316	0.19682	280.16	0.492158	0.0652028	0.265093	TRUE	0.2348	0.3703	0.9999	TRUE	0.8927	4.683e-06	4.184e-05
ENSMUSG00000055013	Agap1	none	264.65	0.350991	0.0744256	0.380559	252.577	0.419001	0.0086275	0.141823	200.629	0.196306	0.27683	0.924885	185.016	0.456777	0.0101381	0.0563814	34.3748	-0.100516	0.859074	0.960332	TRUE	-0.0872	0.3276	0.9999	TRUE	0.07991	0.3972	0.5852
ENSMUSG00000025422	Agap2	none	1136.07	0.0568055	0.678708	0.900583	1329.82	0.125692	0.289353	0.750972	115.741	-0.0883398	0.68006	0.991399	308.068	-0.141306	0.406356	0.649114	76.9963	-2.07607	4.19694e-07	1.51586e-05	TRUE	-0.228	0.1456	0.9492	TRUE	-0.2249	0.1413	0.2861
ENSMUSG00000023353	Agap3	none	861.391	0.0744085	0.566174	0.846277	952.176	-0.060094	0.64076	0.927249	389.486	0.054781	0.709797	0.992723	280.259	-0.0861035	0.621419	0.810542	53.8926	-0.616284	0.173485	0.485505	TRUE	-0.07322	0.5779	0.9999	TRUE	-0.1674	0.2357	0.4138
ENSMUSG00000038836	Agbl3	none	37.6058	0.143389	0.742647	NA	28.9475	-0.37413	0.32206	0.772873	27.0028	0.526852	0.154473	0.835985	61.6992	-0.000152518	0.99951	0.99979	9.32781	0.259081	0.794536	0.934301	TRUE	0.06455	0.7896	0.9999	TRUE	0.292	0.1427	0.2882
ENSMUSG00000061298	Agbl4	none	144.208	-0.155657	0.525957	0.826299	109.169	-0.297073	0.173091	0.634563	38.623	0.255869	0.402113	0.957669	27.0406	-0.544202	0.14016	0.349079	NA	NA	NA	NA	TRUE	0.2041	0.3978	0.9999	TRUE	-0.5609	0.02979	0.08841
ENSMUSG00000029165	Agbl5	none	18.3275	0.335681	0.620407	NA	10.5461	-0.233324	0.704025	NA	8.97577	0.0356769	0.955672	0.995891	11.3549	-0.512369	0.339788	0.589263	9.40255	-1.03119	0.301185	0.63548	TRUE	-0.1022	0.5086	0.9999	TRUE	-0.09963	0.4882	0.668
ENSMUSG00000026159	Agfg1	none	783.618	-0.498978	0.00042981	0.0183342	756.699	-0.097638	0.473406	0.86531	452.308	-0.233998	0.103331	0.765531	349.89	-0.218221	0.154036	0.371477	114.004	0.155581	0.653612	0.876027	TRUE	0.175	0.07791	0.8345	TRUE	-0.126	0.2102	0.3825
ENSMUSG00000029722	Agfg2	none	131.064	-0.00708068	0.977303	0.995841	149.669	-0.0218344	0.920001	0.984722	129.233	0.2182	0.273251	0.924628	70.1741	0.441465	0.0750275	0.233693	14.2958	0.258016	0.752755	0.918751	TRUE	-0.1826	0.0761	0.8265	TRUE	-0.03034	0.7609	0.8658
ENSMUSG00000021681	Aggf1	none	85.7977	0.665966	0.0253041	NA	79.552	0.519014	0.0279981	0.270324	69.7322	0.0986473	0.678254	0.991399	111.44	1.00893	1.91489e-06	3.7042e-05	41.143	0.0458504	0.928338	0.983275	TRUE	0.06924	0.4821	0.9999	TRUE	-0.04661	0.6201	0.7718
ENSMUSG00000029916	Agk	none	72.3631	0.00170671	0.995848	NA	65.9369	-0.370658	0.144368	0.587504	32.4358	-0.0556376	0.863397	0.994132	30.3989	-0.518834	0.121152	0.319226	9.85464	-0.18015	0.851324	0.957678	TRUE	0.06739	0.5629	0.9999	TRUE	-0.5225	2.161e-06	2.047e-05
ENSMUSG00000033400	Agl	none	169.145	0.28853	0.189621	0.568781	190.908	0.415004	0.0115551	0.166458	372.335	0.0949452	0.522537	0.977956	911.95	-0.604356	1.68161e-05	0.000257306	121.103	-0.467771	0.153271	0.451936	TRUE	-0.0002473	0.9981	0.9999	TRUE	0.06955	0.4716	0.6538
ENSMUSG00000040706	Agmat	none	6.32928	-0.109009	0.915269	NA	NA	NA	NA	NA	4.48592	0.0693855	0.932976	0.995591	NA	NA	NA	NA	NA	NA	NA	NA	TRUE	-1.844	0.002669	0.1741	TRUE	0.288	0.5045	0.6824
ENSMUSG00000050103	Agmo	none	14.5249	0.278871	0.686666	NA	NA	NA	NA	NA	3.90817	0.312684	0.759717	0.994132	387.523	-0.896207	8.56481e-06	0.000142176	139.403	-1.00883	0.00194071	0.0208203	TRUE	0.0381	0.8643	0.9999	TRUE	0.248	0.2092	0.3813
ENSMUSG00000041530	Ago1	none	208.773	-0.188771	0.350156	0.717123	299.943	0.0458417	0.741383	0.951869	139.98	-0.167968	0.375932	0.957654	201.039	-0.505524	0.00632397	0.0391771	173.288	-0.258717	0.385631	0.708655	NA	NA	NA	NA	NA	NA	NA	NA
ENSMUSG00000036698	Ago2	none	335.036	0.0920799	0.598254	0.859784	281.767	0.147553	0.325365	0.774499	242.662	-0.167919	0.297211	0.939043	246.534	-0.102513	0.558553	0.767164	86.6427	-0.148554	0.696461	0.897284	NA	NA	NA	NA	NA	NA	NA	NA
ENSMUSG00000028842	Ago3	none	132.24	-0.302814	0.218596	0.606713	161.667	-0.217411	0.217322	0.685312	110.778	-0.322793	0.114323	0.777081	301.489	-0.437122	0.00664646	0.040604	79.1472	-0.0449644	0.906544	0.978072	NA	NA	NA	NA	NA	NA	NA	NA
ENSMUSG00000042500	Ago4	none	19.4542	0.161893	0.785169	NA	21.0025	-0.232503	0.593256	0.909682	12.8406	-0.641694	0.21136	0.890571	20.4657	-1.03087	0.0130494	0.0674732	19.556	-0.762204	0.277242	0.609226	NA	NA	NA	NA	NA	NA	NA	NA
ENSMUSG00000034254	Agpat1	none	333.876	0.0238535	0.888111	0.9726	197.203	-0.0305902	0.858635	0.976808	155.82	-0.16465	0.354602	0.9512	242.871	-0.156387	0.369034	0.615666	38.0357	0.507556	0.349924	0.682497	TRUE	-0.006711	0.9506	0.9999	TRUE	-0.2444	0.01669	0.05572
ENSMUSG00000001211	Agpat3	none	348.353	0.179226	0.285062	0.671479	235.659	0.05338	0.733949	0.949433	261.593	0.0500642	0.760254	0.994132	1288.53	-0.190201	0.288008	0.539509	138.45	-0.356493	0.271991	0.604171	TRUE	-0.07065	0.4693	0.9999	TRUE	0.07094	0.4734	0.6554
ENSMUSG00000023827	Agpat4	none	359.592	-0.182577	0.28238	0.669596	461.13	-0.402167	0.0014832	0.0440205	55.7921	-0.00864309	0.974023	0.997323	384.815	0.46647	0.00479972	0.0314894	36.7749	-0.391033	0.483523	0.782821	TRUE	0.1253	0.2273	0.9954	TRUE	-0.1947	0.03774	0.1069
ENSMUSG00000031467	Agpat5	none	142.369	-0.302514	0.211818	0.597231	154.623	0.364958	0.039159	0.326064	263.159	-0.0308064	0.862389	0.994132	1593.33	-0.471249	0.00150093	0.0121252	61.2824	0.422846	0.321086	0.654192	TRUE	0.1649	0.1103	0.9015	TRUE	-0.03452	0.7345	0.8493
ENSMUSG00000042410	Agps	none	234.863	-0.401076	0.0511865	0.322081	236.904	-0.0214255	0.890316	0.980844	111.937	0.130508	0.51062	0.977729	177.057	-0.154386	0.399977	0.643823	192.344	-0.111028	0.710388	0.903629	TRUE	0.08372	0.4227	0.9999	TRUE	0.1381	0.2155	0.3888
ENSMUSG00000041936	Agrn	none	290.96	0.235678	0.202381	0.586154	313.309	-0.174124	0.229185	0.699017	89.131	-0.514018	0.0354593	0.537278	630.292	0.475908	0.00497051	0.0324162	68.6434	-0.063357	0.88806	0.971795	TRUE	-0.1584	0.1578	0.9641	TRUE	0.1222	0.3059	0.4948
ENSMUSG00000031980	Agt	none	44.8107	0.304185	0.462961	NA	21.1884	0.576931	0.642732	0.927249	50.263	0.900626	0.00190852	0.174081	10251.7	0.0950477	0.594571	0.791963	54.7368	-0.368287	0.417922	0.735908	TRUE	0.01731	0.9404	0.9999	TRUE	0.01935	0.9234	0.962
ENSMUSG00000021557	Agtpbp1	none	1419.72	-0.208317	0.0722769	0.374221	1792.01	-0.00161055	0.988359	0.9975	774.463	0.00232188	0.985041	0.997323	337.39	-0.156731	0.310461	0.561395	93.0148	-1.13974	0.00307809	0.0300966	TRUE	0.01308	0.8878	0.9999	TRUE	-0.2906	0.004659	0.01971
ENSMUSG00000029007	Agtrap	none	4.30676	0.970569	0.446952	NA	NA	NA	NA	NA	23.0133	0.416099	0.275591	0.924885	121.666	0.467877	0.0497205	0.177054	36.1917	0.93916	0.0948398	0.338575	TRUE	0.3216	0.08465	0.8499	TRUE	0.8667	7.474e-10	1.103e-08
ENSMUSG00000026491	Ahctf1	none	355.667	-0.0171132	0.928296	0.983309	515.168	0.232166	0.0718069	0.446082	171.673	-0.0154414	0.926669	0.994877	150.985	-0.268617	0.158173	0.377454	109.529	-0.436318	0.202028	0.52427	TRUE	0.2767	0.01809	0.4803	TRUE	-0.0933	0.3862	0.5747
ENSMUSG00000027597	Ahcy	none	NA	NA	NA	NA	3.84358	0.111526	0.917398	NA	NA	NA	NA	NA	NA	NA	NA	NA	NA	NA	NA	NA	TRUE	-0.111	0.503	0.9999	TRUE	0.07781	0.5662	0.7312
ENSMUSG00000027893	Ahcyl1	none	1665.95	-0.109181	0.34165	0.711263	1465.56	0.0105884	0.917406	0.984651	1452.91	0.00748389	0.948024	0.995591	3380.92	-1.07139	4.16822e-15	2.56489e-13	269.986	0.227696	0.385484	0.708494	TRUE	-0.02102	0.858	0.9999	TRUE	-0.3638	0.00226	0.01059
ENSMUSG00000029772	Ahcyl2	none	274.678	-0.099763	0.589194	0.856189	760.562	0.353095	0.00229765	0.0581905	693.985	0.00851079	0.945244	0.995591	1043.04	-0.605596	2.07373e-05	0.000309671	93.1641	0.2828	0.475314	0.776772	TRUE	0.07131	0.5771	0.9999	TRUE	-0.1925	0.1116	0.2409
ENSMUSG00000037692	Ahdc1	none	375.872	0.391349	0.0241228	0.214758	331.798	0.308599	0.0321139	0.292837	103.076	0.19406	0.39553	0.957654	83.0653	-0.543051	0.0147263	0.0740254	23.071	-0.659968	0.323524	0.655833	TRUE	-0.08064	0.547	0.9999	TRUE	0.07063	0.6871	0.8182
ENSMUSG00000019986	Ahi1	none	1098	-0.40013	0.00338845	0.0722696	2230.71	-0.145084	0.132729	0.572394	415.177	0.0336229	0.808878	0.994132	1028.85	-0.292751	0.0494963	0.17652	101.727	-1.53522	0.000866221	0.0110659	TRUE	0.0195	0.8502	0.9999	TRUE	-0.3334	0.002765	0.01257
ENSMUSG00000069833	Ahnak	none	78.2321	-0.235387	0.457471	NA	29.4386	-0.721477	0.0616428	0.412211	94.2688	0.40415	0.0818715	0.712637	2513.92	2.62932	1.28455e-13	6.86823e-12	143.536	-0.90624	0.0158575	0.0998442	TRUE	0.09011	0.4539	0.9999	TRUE	1.368	1.186e-22	4.446e-21
ENSMUSG00000072812	Ahnak2	none	9.14831	-0.152062	0.859059	NA	8.10809	-0.339278	0.657076	NA	183.592	-0.0829256	0.681809	0.991399	58.0506	3.4386	1.06643e-20	9.75917e-19	62.0473	3.95079	1.35835e-10	8.84709e-09	NA	NA	NA	NA	NA	NA	NA	NA
ENSMUSG00000019256	Ahr	none	55.1052	-0.603133	0.0959194	NA	69.0823	-0.543121	0.0438182	0.345111	43.7795	-0.366921	0.201756	0.884347	16.6522	0.249985	0.576275	0.779923	10.2299	-2.80532	0.00626402	0.051278	TRUE	-0.1904	0.2715	0.9999	TRUE	-0.4407	0.00303	0.01359
ENSMUSG00000021037	Ahsa1	none	874.307	-0.0926812	0.471086	0.79312	1009.34	-0.340363	0.00089939	0.0320497	693.313	-0.217074	0.0803269	0.710141	348.792	-0.320557	0.0604034	0.200679	182.309	-0.181544	0.528614	0.811141	TRUE	0.183	0.03313	0.6198	TRUE	-0.5152	1.66e-09	2.354e-08
ENSMUSG00000020288	Ahsa2	none	128.681	0.006599	0.97863	0.996254	164.354	-0.367862	0.0449772	0.35049	89.813	-0.348366	0.107267	0.768394	79.4118	-0.459994	0.0553898	0.189593	27.0611	0.015679	0.979143	0.993629	TRUE	0.3892	0.001232	0.1124	TRUE	-0.2962	0.02183	0.069
ENSMUSG00000097745	AI115009	none	6.23196	0.923704	0.386443	NA	NA	NA	NA	NA	NA	NA	NA	NA	NA	NA	NA	NA	NA	NA	NA	NA	TRUE	-0.6657	0.01276	0.4108	TRUE	-0.0529	0.815	0.8983
ENSMUSG00000062753	AI413582	none	129.859	0.231341	0.365471	0.728302	69.3441	-0.071092	0.784434	0.961577	81.4524	-0.00390781	0.985959	0.997323	248.151	0.13759	0.457185	0.693894	67.9631	0.0576164	0.887685	0.971571	TRUE	-0.02092	0.8891	0.9999	TRUE	0.1379	0.3249	0.5152
ENSMUSG00000074384	AI429214	none	10.0136	-0.318996	0.704645	NA	13.0782	-0.137891	0.80876	0.968072	8.75651	0.360043	0.553489	0.980439	17.4945	-0.339969	0.438769	0.678351	NA	NA	NA	NA	TRUE	-0.146	0.6198	0.9999	TRUE	0.5606	0.03807	0.1077
ENSMUSG00000090086	AI480526	none	NA	NA	NA	NA	NA	NA	NA	NA	5.57244	-0.164675	0.830209	0.994132	9.44089	0.154964	0.788282	0.905643	NA	NA	NA	NA	NA	NA	NA	NA	NA	NA	NA	NA
ENSMUSG00000105987	AI506816	none	NA	NA	NA	NA	NA	NA	NA	NA	13.9981	0.0236913	0.960446	0.997028	71.839	1.66385	6.506e-11	2.57285e-09	102.023	0.535569	0.134242	0.416274	FALSE	0.1341	0.8428	NA	TRUE	2.075	1.669e-05	0.0001348
ENSMUSG00000078307	AI593442	none	734.657	-0.509108	0.00021742	0.0117188	695.535	-0.0166039	0.886724	0.980844	485.093	-0.216595	0.117457	0.78696	144.719	-0.355815	0.152857	0.370013	18.2035	-0.597992	0.405458	0.723993	TRUE	-0.2405	0.02523	0.5438	TRUE	-0.2857	0.01434	0.04927
ENSMUSG00000010290	AI597479	none	121.154	-0.239071	0.380706	0.737988	145.157	-0.26323	0.175407	0.638072	139.864	-0.366687	0.0690363	0.676058	226.124	-0.242877	0.16396	0.384161	63.6694	0.111859	0.807046	0.939203	TRUE	0.06482	0.5257	0.9999	TRUE	-0.04251	0.6841	0.8164
ENSMUSG00000047423	AI837181	none	254.574	0.169666	0.368031	0.729011	190.987	-0.293646	0.0933394	0.498591	116.907	0.0912887	0.669451	0.991361	103.002	0.304758	0.150776	0.366567	56.6525	0.187631	0.673955	0.886967	TRUE	-0.1066	0.3957	0.9999	TRUE	0.01841	0.881	0.9381
ENSMUSG00000053297	AI854703	none	36.9631	0.477833	0.275188	NA	23.3242	-0.315224	0.446865	0.856321	27.7111	0.181742	0.602258	0.988825	13.6275	-0.0535816	0.911969	0.966483	NA	NA	NA	NA	TRUE	0.05058	0.6881	0.9999	TRUE	-0.4137	0.0005257	0.00297
ENSMUSG00000056383	AI987944	none	48.4639	-0.99884	0.0111942	NA	69.7662	-0.0214773	0.932377	0.988396	46.8396	0.165116	0.582435	0.984553	134.535	-0.0579571	0.765059	0.895112	48.4162	0.628626	0.191409	0.5088	TRUE	0.06016	0.7677	0.9999	TRUE	0.1507	0.3737	0.5634
ENSMUSG00000042901	Aida	none	17.6545	0.229968	0.721685	NA	19.0462	0.315397	0.495939	0.875807	14.9579	0.493182	0.300993	0.939405	44.3142	0.121923	0.680129	0.844527	12.1536	-0.387792	0.655045	0.876859	TRUE	0.1124	0.2817	0.9999	TRUE	0.1367	0.2241	0.3997
ENSMUSG00000024397	Aif1	none	14.2722	2.64683	0.00129092	NA	6.90693	-0.983503	0.281379	NA	5.90215	1.93427	0.0200042	0.445317	9.96622	1.04714	0.0737975	0.230734	2200.04	0.325878	0.132333	0.41284	TRUE	0.05894	0.8382	0.9999	TRUE	2.003	3.099e-36	2.241e-34
ENSMUSG00000036932	Aifm1	none	132.814	-0.0195054	0.935829	0.984539	174.402	0.110606	0.514301	0.881466	138.276	0.109453	0.553136	0.980439	83.2352	-0.203955	0.385986	0.631412	49.0783	-0.0559084	0.904486	0.977031	TRUE	0.1149	0.3911	0.9999	TRUE	-0.2054	0.09382	0.2122
ENSMUSG00000020085	Aifm2	none	13.4659	-0.147449	0.840482	NA	4.22149	-1.33897	0.169683	NA	15.4531	0.0634018	0.894067	0.994132	40.6437	-0.0656353	0.833819	0.927649	6.83339	-0.0396151	0.972647	0.991725	TRUE	0.2226	0.2887	0.9999	TRUE	0.2344	0.1644	0.3195
ENSMUSG00000022763	Aifm3	none	185.693	0.305226	0.151525	0.514736	51.9226	-0.438198	0.183154	0.649251	95.4653	-0.277829	0.183645	0.866408	186.982	-1.24563	6.6712e-08	1.71029e-06	11.7931	-1.6838	0.0857762	0.316841	TRUE	0.2275	0.01967	0.4921	TRUE	-0.5776	0.002835	0.01284
ENSMUSG00000019806	Aig1	none	293.888	-0.048318	0.787992	0.942364	228.988	-0.519372	0.00161671	0.0467034	452.08	-0.363692	0.0110721	0.365207	374.199	0.122565	0.495495	0.723503	86.1874	0.438944	0.259489	0.590503	TRUE	0.1162	0.4044	0.9999	TRUE	-0.08853	0.464	0.6472
ENSMUSG00000037860	Aim2	none	3.99592	2.04798	0.161988	NA	5.28375	0.311474	0.720398	NA	NA	NA	NA	NA	NA	NA	NA	NA	118.706	0.93087	0.00641115	0.0523387	TRUE	-0.19	0.4549	0.9999	TRUE	1.394	4.92e-15	1.109e-13
ENSMUSG00000028029	Aimp1	none	341.203	-0.0655556	0.711134	0.916147	524.609	-0.0184827	0.877411	0.978576	365.059	-0.180716	0.187571	0.86867	239.43	-0.631609	0.000154254	0.00178455	115.701	-0.0177743	0.957777	0.989301	TRUE	-0.05463	0.6465	0.9999	TRUE	-0.1272	0.2538	0.435
ENSMUSG00000029610	Aimp2	none	227.653	-0.0575742	0.767601	0.937383	265.651	-0.0976845	0.499211	0.877061	200.739	-0.145603	0.367622	0.956332	146.772	-0.410895	0.0398066	0.152517	48.3406	0.427952	0.453442	0.762497	TRUE	0.02551	0.8731	0.9999	TRUE	-0.2343	0.08317	0.194
ENSMUSG00000024847	Aip	none	460.428	0.443607	0.00380455	0.0773599	333.92	0.053082	0.701547	0.942708	278.547	0.144053	0.352042	0.9512	225.242	0.0702582	0.675987	0.842756	139.152	0.0902301	0.786531	0.930672	TRUE	0.0097	0.9331	0.9999	TRUE	-0.216	0.09223	0.2096
ENSMUSG00000039546	Ajap1	none	115.054	0.475282	0.0812809	0.395207	91.7246	0.103521	0.63879	0.92687	52.1115	0.010468	0.970574	0.997323	47.1132	0.13892	0.641338	0.822713	9.84013	-1.83054	0.0886977	0.323695	TRUE	-0.07636	0.4885	0.9999	TRUE	-0.2746	0.01208	0.04299
ENSMUSG00000029419	Ajm1	none	263.783	0.356593	0.0597546	0.348552	200.45	-0.153944	0.377028	0.815519	151.027	-0.160824	0.434582	0.964767	73.428	-0.335483	0.160304	0.379879	17.7311	-0.558707	0.451686	0.761693	NA	NA	NA	NA	NA	NA	NA	NA
ENSMUSG00000026817	Ak1	none	704.16	0.342821	0.0154697	0.168326	420.682	-0.358388	0.00735405	0.126656	454.984	0.0785346	0.601378	0.98859	409.737	-0.210861	0.153877	0.371323	192.048	0.606797	0.0416813	0.19559	TRUE	-0.07591	0.4965	0.9999	TRUE	-0.04223	0.6753	0.8102
ENSMUSG00000078139	AK157302	none	NA	NA	NA	NA	NA	NA	NA	NA	4.45528	1.25858	0.178437	0.861433	NA	NA	NA	NA	NA	NA	NA	NA	NA	NA	NA	NA	NA	NA	NA	NA
ENSMUSG00000028792	Ak2	none	72.2252	0.16167	0.611716	NA	67.5633	0.0566876	0.830579	0.970437	75.7441	0.10553	0.679055	0.991399	143.61	0.64187	0.000985453	0.0086681	101.077	0.835761	0.0253232	0.138707	TRUE	0.01446	0.9136	0.9999	TRUE	0.3226	0.004118	0.0177
ENSMUSG00000024782	Ak3	none	188.813	-0.0347522	0.868511	0.966046	153.429	-0.389134	0.0403909	0.331941	75.4889	0.153103	0.535521	0.979472	1404.43	0.266203	0.10123	0.28504	69.1606	0.306971	0.449999	0.760564	TRUE	0.1195	0.21	0.9954	TRUE	0.671	5.514e-12	1.005e-10
ENSMUSG00000028527	Ak4	none	42.7566	-0.130976	0.754563	NA	112.509	-0.113542	0.6145	0.917849	24.3127	0.383666	0.327051	0.94491	63.5528	-1.38989	2.27423e-07	5.28777e-06	NA	NA	NA	NA	TRUE	0.4932	6.631e-05	0.0185	TRUE	-0.1002	0.3744	0.5642
ENSMUSG00000039058	Ak5	none	2000.51	0.155005	0.164635	0.534596	2675.7	0.0435603	0.659469	0.932925	132.18	-0.0650274	0.754192	0.994132	246.129	-0.0987343	0.69026	0.850704	41.4837	-2.31908	8.6269e-05	0.00160412	TRUE	-0.05395	0.6615	0.9999	TRUE	-0.1664	0.1186	0.2524
ENSMUSG00000078941	Ak6	none	53.3139	-0.402076	0.308696	NA	59.9001	-0.140745	0.611011	0.917849	56.3468	-0.124991	0.660855	0.991361	61.7511	-0.388646	0.115031	0.309146	29.0607	0.566745	0.354591	0.686225	NA	NA	NA	NA	NA	NA	NA	NA
ENSMUSG00000026807	Ak8	none	21.0203	0.969286	0.115625	NA	12.8041	0.129668	0.81194	0.968549	5.79152	0.126917	0.867018	0.994132	8.60292	0.176792	0.764013	0.89472	NA	NA	NA	NA	TRUE	0.344	0.3885	0.9999	TRUE	0.413	0.1757	0.3355
ENSMUSG00000018428	Akap1	none	178.207	-0.0536085	0.802798	0.947181	266.245	-0.207315	0.166139	0.625691	158.115	-0.259659	0.215567	0.892104	165.36	-0.0942089	0.618129	0.808022	73.3344	0.564147	0.157947	0.459311	TRUE	-0.1531	0.1125	0.9058	TRUE	-0.235	0.01253	0.04419
ENSMUSG00000047804	Akap10	none	253.193	-0.118838	0.524875	0.825856	229.448	-0.0474786	0.761671	0.956775	226.683	-0.0296393	0.852084	0.994132	112.973	-0.302291	0.139406	0.347998	75.7153	0.574972	0.147731	0.44286	TRUE	0.1204	0.3773	0.9999	TRUE	-0.09592	0.4895	0.6687
ENSMUSG00000022016	Akap11	none	2442.98	-0.0364738	0.783661	0.941395	4360.25	0.309632	0.00169669	0.0479902	1783.37	-0.0632551	0.627539	0.991361	1675.34	0.0484551	0.724665	0.871612	316.79	-0.910261	0.0014161	0.0164567	TRUE	0.04589	0.6661	0.9999	TRUE	-0.003895	0.9714	0.9867
ENSMUSG00000038587	Akap12	none	121.816	-0.0439694	0.865168	0.965262	59.9096	-0.476943	0.165483	0.62569	937.125	0.0678888	0.656354	0.991361	75.7674	1.23082	3.54364e-07	7.99194e-06	39.9438	-1.11749	0.027373	0.147295	TRUE	0.121	0.4737	0.9999	TRUE	-0.3797	0.009756	0.03607
ENSMUSG00000066406	Akap13	none	92.4381	-0.0315415	0.912198	NA	174.577	0.219954	0.202987	0.67267	85.8308	-0.0470119	0.847919	0.994132	138.138	0.357071	0.0779922	0.239754	572.59	0.189611	0.434343	0.749679	TRUE	0.203	0.06575	0.8019	TRUE	0.03826	0.7576	0.863
ENSMUSG00000059708	Akap17b	none	103.288	-0.469247	0.0826781	0.396256	92.3545	-0.0569526	0.820012	0.96924	49.9903	0.103178	0.70192	0.992723	25.143	-0.200587	0.59128	0.790107	12.3503	-0.722395	0.430282	0.746258	TRUE	-0.01882	0.9014	0.9999	TRUE	-0.2119	0.06788	0.1664
ENSMUSG00000021057	Akap5	none	759.96	-0.48862	0.000289053	0.0138606	591.792	-0.403292	0.00972555	0.152821	87.3674	-0.679013	0.00328734	0.223748	179.512	-0.784218	0.000217333	0.00238298	80.2195	1.72281	7.11898e-05	0.00136198	TRUE	0.03474	0.7324	0.9999	TRUE	-0.5525	8.366e-10	1.228e-08
ENSMUSG00000061603	Akap6	none	3059.63	0.205437	0.1211	0.476771	2265.46	0.176632	0.162525	0.619724	1591.04	0.218489	0.0642927	0.665047	879.374	-0.362686	0.0191517	0.0900264	131.823	-2.72532	5.28292e-10	3.11719e-08	TRUE	0.08229	0.3815	0.9999	TRUE	-0.4342	0.0001689	0.001092
ENSMUSG00000039166	Akap7	none	54.2862	-0.0785407	0.839212	NA	34.6075	-0.158137	0.642972	0.927249	64.2229	-0.203493	0.427869	0.962425	83.4724	-0.213334	0.343009	0.592188	35.3775	0.288442	0.625771	0.860471	TRUE	-0.2507	0.03104	0.6026	TRUE	-0.2122	0.1109	0.24
ENSMUSG00000024045	Akap8	none	86.8185	-0.056355	0.856421	NA	105.622	-0.00296746	0.988913	0.9975	67.5842	-0.192958	0.461284	0.970586	30.6519	-0.0793137	0.815994	0.920516	73.9477	0.241907	0.540716	0.81853	TRUE	0.04945	0.5799	0.9999	TRUE	-0.08566	0.3714	0.5611
ENSMUSG00000002625	Akap8l	none	163.926	-0.270233	0.226228	0.61631	193.163	0.30794	0.0575016	0.398677	60.8655	0.016263	0.948441	0.995591	44.7015	-0.253201	0.393795	0.638843	41.4026	-0.174178	0.741583	0.913908	TRUE	-0.01119	0.9017	0.9999	TRUE	-0.2121	0.01686	0.05618
ENSMUSG00000040407	Akap9	none	1072.76	-0.29939	0.0138253	0.160212	902.397	0.29671	0.0161746	0.20071	1198.93	-0.244656	0.0526749	0.62067	817.894	-0.261257	0.0584885	0.196189	301.911	-0.601997	0.021153	0.121916	TRUE	0.1502	0.2282	0.9954	TRUE	-0.013	0.9021	0.9504
ENSMUSG00000031023	Akip1	none	NA	NA	NA	NA	4.36255	0.60082	0.525456	NA	NA	NA	NA	NA	20.3759	0.794087	0.0501425	0.177961	35.7474	0.571954	0.295474	0.62841	NA	NA	NA	NA	NA	NA	NA	NA
ENSMUSG00000023075	Akirin1	none	147.472	-0.0839085	0.734978	0.924105	129.345	0.194994	0.377867	0.81637	101.645	-0.194119	0.352573	0.9512	170.473	0.0524139	0.781726	0.902283	192.915	1.46689	3.72081e-06	0.000102421	TRUE	0.05076	0.6056	0.9999	TRUE	0.1334	0.175	0.3344
ENSMUSG00000028291	Akirin2	none	429.786	-0.321695	0.0880963	0.41137	545.778	0.189143	0.169808	0.63214	357.219	-0.160322	0.306392	0.939405	369.447	-0.219533	0.176236	0.402072	198.668	-0.0309226	0.914394	0.979448	TRUE	0.02307	0.8274	0.9999	TRUE	0.01634	0.8768	0.9357
ENSMUSG00000028692	Akr1a1	none	1016.56	0.351908	0.00675151	0.10968	1000.47	0.00227831	0.985848	0.997118	653.328	0.245656	0.149775	0.832465	521.936	0.355666	0.0167933	0.0816281	805.789	1.04848	3.08438e-05	0.000655306	TRUE	-0.05636	0.552	0.9999	TRUE	0.1151	0.2625	0.4448
ENSMUSG00000061758	Akr1b10	none	43.7481	0.775619	0.0662431	NA	43.2813	0.461766	0.136091	0.577695	58.6456	0.535047	0.0331886	0.524494	225.157	0.128779	0.469057	0.704764	140.358	-0.642153	0.0540076	0.232473	TRUE	-0.02101	0.8903	0.9999	TRUE	0.4552	0.0003225	0.00193
ENSMUSG00000001642	Akr1b3	none	17.0715	0.83639	0.201159	NA	11.5112	0.97702	0.141889	NA	14.1346	0.246557	0.607373	0.989253	9.59585	0.432723	0.454355	0.690774	19.1104	0.67745	0.386759	0.709442	TRUE	-0.1154	0.3757	0.9999	TRUE	0.1923	0.1174	0.2505
ENSMUSG00000045410	Akr1e1	none	177.096	-0.0580098	0.806229	0.948081	227.001	0.161672	0.307273	0.762061	157.518	0.262947	0.146349	0.826356	202.808	0.439469	0.0137852	0.070436	34.204	-0.131484	0.808757	0.939897	TRUE	0.07838	0.5763	0.9999	TRUE	0.1337	0.3103	0.4998
ENSMUSG00000028743	Akr7a5	none	77.3295	0.558929	0.0723332	NA	44.4991	0.106537	0.730944	0.948749	43.6708	-0.00436425	0.988243	0.997356	73.4593	0.381725	0.117038	0.312423	32.369	0.202008	0.719292	0.906691	TRUE	0.08215	0.6585	0.9999	TRUE	0.1411	0.318	0.5077
ENSMUSG00000001729	Akt1	none	241.869	0.0524295	0.786955	0.942247	167.531	-0.267202	0.126184	0.563329	164.051	-0.15943	0.378669	0.957654	169.357	0.200797	0.306416	0.557508	167.107	-0.136808	0.657575	0.877773	TRUE	-0.1291	0.1694	0.9765	TRUE	-0.03065	0.7639	0.8677
ENSMUSG00000011096	Akt1s1	none	86.2058	0.186611	0.526965	NA	61.1417	0.0151821	0.955929	0.991677	39.0575	0.139578	0.64896	0.991361	95.6581	0.330267	0.133948	0.33929	26.5174	-0.193588	0.748372	0.917585	TRUE	-0.0577	0.7219	0.9999	TRUE	0.01518	0.9325	0.9667
ENSMUSG00000004056	Akt2	none	72.9435	-0.138637	0.68332	NA	31.4886	0.0277785	0.938513	0.989189	16.3923	-0.0128378	0.97705	0.997323	309.852	-0.556621	0.00136831	0.0113016	19.7278	-0.166754	0.809892	0.940292	TRUE	0.06834	0.4679	0.9999	TRUE	-0.4339	7.665e-07	7.753e-06
ENSMUSG00000019699	Akt3	none	581.121	-0.366794	0.0099454	0.134534	788.96	-0.232175	0.0431737	0.342638	285.494	-0.363262	0.0479513	0.59843	279.619	-0.294313	0.0830011	0.250226	83.0813	0.253033	0.504381	0.797072	TRUE	-0.03134	0.7366	0.9999	TRUE	-0.4741	2.141e-06	2.031e-05
ENSMUSG00000031667	Aktip	none	269.653	0.120288	0.51432	0.818323	186.648	0.0301002	0.87149	0.977617	260.682	-0.171048	0.283075	0.930477	552.036	0.484545	0.0010913	0.00943067	80.2303	-0.706514	0.0643148	0.262344	TRUE	0.1735	0.07782	0.8345	TRUE	-0.04172	0.6446	0.7879
ENSMUSG00000028393	Alad	none	163.858	-0.000860767	0.996919	0.999806	113.493	-0.212294	0.301684	0.759062	71.2013	0.112506	0.643768	0.991361	69.9451	0.167999	0.502798	0.72806	15.7511	0.0570688	0.946123	0.98729	TRUE	-0.06498	0.6948	0.9999	TRUE	0.07902	0.5401	0.7098
ENSMUSG00000032786	Alas1	none	592.032	0.238567	0.111585	0.45907	668.608	0.223177	0.0523751	0.379518	414.632	0.245704	0.0766826	0.702568	245.783	0.0239169	0.89022	0.956038	313.943	1.33879	1.23488e-06	3.93564e-05	TRUE	-0.0652	0.529	0.9999	TRUE	0.1459	0.1214	0.2565
ENSMUSG00000022636	Alcam	none	2545.17	-0.393134	0.000631301	0.0244909	1776.06	-0.66468	1.19459e-08	3.23524e-06	987.55	-0.58686	0.00217332	0.183932	3259.16	-0.720711	6.44053e-08	1.65966e-06	301.117	1.60067	9.55265e-09	4.80414e-07	TRUE	0.1261	0.1752	0.9839	TRUE	-0.5928	8.05e-11	1.317e-09
ENSMUSG00000007833	Aldh16a1	none	28.5824	0.516185	0.304569	NA	13.9565	0.362509	0.529617	0.889553	17.6891	0.568078	0.182673	0.865134	14.1476	-0.108553	0.82122	0.92208	46.0436	-0.526999	0.269962	0.60166	TRUE	0.09006	0.7247	0.9999	TRUE	0.6267	0.004779	0.02016
ENSMUSG00000025007	Aldh18a1	none	163.311	0.123871	0.580788	0.853339	130.084	0.114371	0.558354	0.899293	190.36	0.0579063	0.726899	0.993949	77.6581	0.308688	0.198298	0.430752	57.5625	-0.0618931	0.886428	0.9709	TRUE	0.01372	0.9148	0.9999	TRUE	0.1856	0.08815	0.2027
ENSMUSG00000053279	Aldh1a1	none	82.1496	0.568361	0.0714941	NA	21.4459	-0.00109733	0.998129	0.999355	26.3482	0.915825	0.0188699	0.4438	3143.37	0.516684	0.000554364	0.00528219	37.9152	-0.694802	0.250167	0.581008	TRUE	-0.07493	0.5381	0.9999	TRUE	1.328	9.797e-16	2.347e-14
ENSMUSG00000013584	Aldh1a2	none	13.0764	0.574788	0.428402	NA	NA	NA	NA	NA	NA	NA	NA	NA	7.59887	-0.49667	0.447107	0.684861	NA	NA	NA	NA	TRUE	0.02872	0.9376	0.9999	TRUE	0.2761	0.3769	0.5661
ENSMUSG00000015134	Aldh1a3	none	5.66852	-0.646927	0.565939	NA	NA	NA	NA	NA	6.56957	0.539897	0.463556	0.970586	NA	NA	NA	NA	NA	NA	NA	NA	TRUE	0.5422	0.2776	0.9999	TRUE	-1.051	0.009026	0.03384
ENSMUSG00000024747	Aldh1a7	none	4.47211	0.258395	0.833028	NA	NA	NA	NA	NA	NA	NA	NA	NA	4.16794	-0.521604	0.545288	0.758283	NA	NA	NA	NA	NA	NA	NA	NA	NA	NA	NA	NA
ENSMUSG00000035561	Aldh1b1	none	53.7148	0.611971	0.100923	NA	97.5539	0.125271	0.559182	0.899454	15.7313	-0.206051	0.655424	0.991361	17.0919	1.50862	0.00162959	0.0129749	10.2501	0.546414	0.608406	0.850128	TRUE	-0.1207	0.5325	0.9999	TRUE	0.1435	0.41	0.5982
ENSMUSG00000030088	Aldh1l1	none	131.583	0.485089	0.069625	0.368139	10.7276	0.962962	0.188934	NA	19.2391	0.540453	0.212578	0.890571	1329.14	0.113638	0.390065	0.635498	28.9467	-0.741354	0.207707	0.53135	TRUE	-0.03038	0.7846	0.9999	TRUE	1.413	6.066e-60	1.177e-57
ENSMUSG00000029455	Aldh2	none	255.691	-0.0590935	0.751537	0.930169	334.752	-0.524749	0.00110168	0.0364971	91.5207	0.124039	0.608047	0.989253	543.388	-0.62896	3.87351e-05	0.00054214	231.267	0.0361627	0.900098	0.975652	TRUE	0.1476	0.2516	0.9999	TRUE	0.04249	0.7241	0.8426
ENSMUSG00000019102	Aldh3a1	none	13.1147	-0.799062	0.273154	NA	4.52338	-1.31529	0.188865	NA	5.16281	-0.294865	0.710549	0.992723	NA	NA	NA	NA	NA	NA	NA	NA	TRUE	0.02038	0.9653	0.9999	TRUE	0.03519	0.9305	0.9662
ENSMUSG00000010025	Aldh3a2	none	324.443	-0.0551428	0.768792	0.937383	331.455	-0.0894647	0.503223	0.878694	192.298	0.430741	0.00897794	0.337993	190.498	0.183568	0.30432	0.555488	140.006	-0.214113	0.515029	0.802352	TRUE	0.07775	0.4373	0.9999	TRUE	0.05114	0.5872	0.7471
ENSMUSG00000024885	Aldh3b1	none	4.63724	0.687502	0.575466	NA	NA	NA	NA	NA	NA	NA	NA	NA	30.7089	1.75699	1.4681e-06	2.90687e-05	27.3492	0.639894	0.29673	0.630162	TRUE	0.3338	0.268	0.9999	TRUE	1.559	3.424e-16	8.551e-15
ENSMUSG00000075296	Aldh3b2	none	NA	NA	NA	NA	NA	NA	NA	NA	NA	NA	NA	NA	NA	NA	NA	NA	NA	NA	NA	NA	TRUE	-0.7441	0.1962	0.9879	TRUE	-0.0219	0.9573	0.9797
ENSMUSG00000028737	Aldh4a1	none	4.3846	0.0994627	0.938185	NA	4.5183	0.619194	0.507467	NA	NA	NA	NA	NA	19.4629	0.111623	0.784717	0.903729	NA	NA	NA	NA	TRUE	0.0294	0.8208	0.9999	TRUE	0.1635	0.1417	0.2869
ENSMUSG00000035936	Aldh5a1	none	207.822	0.0748082	0.723993	0.918333	251.999	-0.131696	0.392185	0.826403	330.768	0.0383522	0.795518	0.994132	357.562	-0.495543	0.00143712	0.0117237	27.4157	-1.63681	0.0129123	0.0865105	TRUE	-0.00496	0.9587	0.9999	TRUE	-0.3902	1.428e-05	0.0001165
ENSMUSG00000021238	Aldh6a1	none	191.945	0.206811	0.327983	0.700389	184.267	-0.156354	0.369986	0.811341	147.451	-0.0216055	0.912548	0.994132	1743.5	-0.505585	0.00465518	0.0307531	128.065	-0.115036	0.736675	0.911306	TRUE	-0.0127	0.9001	0.9999	TRUE	0.2558	0.00726	0.02841
ENSMUSG00000053644	Aldh7a1	none	222.75	-0.1472	0.492324	0.805384	197.06	-0.0236803	0.891156	0.980844	144.13	-0.0937287	0.616209	0.98964	1222.23	-0.302715	0.0408325	0.155033	74.1263	-0.229707	0.563446	0.828936	TRUE	0.01683	0.8549	0.9999	TRUE	0.173	0.04267	0.1175
ENSMUSG00000026687	Aldh9a1	none	86.4395	0.355038	0.234367	NA	85.0386	0.170777	0.486294	0.871423	101.623	0.252454	0.206395	0.886796	256.48	-0.579001	0.000328293	0.00338391	119.361	-0.430174	0.229003	0.554909	TRUE	0.04565	0.6806	0.9999	TRUE	-0.1419	0.1926	0.3588
ENSMUSG00000030695	Aldoa	none	9378.3	0.356487	0.00070349	0.0259903	7312.66	0.0524416	0.627909	0.923923	4638.04	0.18446	0.190309	0.871485	2411.41	-0.239029	0.0695403	0.221006	1060.87	0.372764	0.104804	0.359282	TRUE	-0.005427	0.9722	0.9999	TRUE	-0.01958	0.9017	0.9502
ENSMUSG00000059343	Aldoart1	none	5.19128	2.31189	0.0771008	NA	10.8005	-0.810533	0.220204	NA	4.5942	-0.086496	0.91492	0.994132	NA	NA	NA	NA	NA	NA	NA	NA	FALSE	0.6126	0.3945	NA	FALSE	0.4284	0.5486	NA
ENSMUSG00000017390	Aldoc	none	957.116	0.679041	2.06951e-07	6.25621e-05	198.513	-0.343794	0.541802	0.893084	7615.36	0.174346	0.154919	0.836211	16976.3	-0.309664	0.0324137	0.132173	383.918	-1.38095	3.25919e-05	0.000688765	TRUE	-0.02201	0.8741	0.9999	TRUE	0.4048	0.002953	0.01331
ENSMUSG00000039427	Alg1	none	137.178	0.0997392	0.678533	0.900583	158.107	-0.267432	0.139104	0.58107	104.469	-0.126092	0.531383	0.979024	169.01	-0.18455	0.38444	0.629677	89.9208	0.120277	0.745691	0.916006	TRUE	-0.06887	0.6015	0.9999	TRUE	-0.05621	0.6379	0.7831
ENSMUSG00000075470	Alg10b	none	192.262	-0.542996	0.0142428	0.162879	318.483	0.0316158	0.818051	0.96924	199.087	-0.16187	0.462679	0.970586	312.61	-0.477088	0.00904139	0.0517334	57.3552	0.80985	0.0689565	0.274982	TRUE	0.06586	0.5699	0.9999	TRUE	-0.02274	0.8315	0.9081
ENSMUSG00000063362	Alg11	none	185.398	-0.2445	0.261183	0.651128	256.422	-0.129016	0.399635	0.828962	219.173	-0.103683	0.537512	0.979472	227.567	-0.125629	0.442128	0.680844	75.3396	0.364862	0.354168	0.685948	TRUE	0.1167	0.3296	0.9999	TRUE	-0.3806	0.0004314	0.002491
ENSMUSG00000035845	Alg12	none	32.7736	-0.157811	0.731653	NA	24.8099	-0.392393	0.341132	0.789096	49.6356	-0.222742	0.416937	0.958938	73.6073	-0.516403	0.032085	0.131095	34.7432	-0.099581	0.852519	0.958012	TRUE	0.2379	0.1337	0.9382	TRUE	0.02135	0.8771	0.9359
ENSMUSG00000041718	Alg13	none	31.2767	-0.693442	0.144215	NA	26.9062	0.0612138	0.873812	0.978534	27.366	0.196422	0.573681	0.983338	38.7515	-0.0450538	0.879801	0.950726	15.203	0.77685	0.361206	0.691594	TRUE	0.01026	0.9607	0.9999	TRUE	0.1205	0.5148	0.6905
ENSMUSG00000039887	Alg14	none	33.1136	0.0470958	0.918121	NA	28.7905	-0.568221	0.134656	0.5751	28.7974	-0.144699	0.679207	0.991399	111.725	0.350425	0.135602	0.341841	30.6828	-0.348908	0.548285	0.822427	TRUE	0.1529	0.4371	0.9999	TRUE	0.3179	0.05922	0.1503
ENSMUSG00000039740	Alg2	none	871.639	0.0436573	0.741353	0.92683	1127.22	-0.199144	0.064461	0.422824	535.692	0.122509	0.349022	0.950864	380.4	0.129304	0.41771	0.659455	91.1405	-0.712198	0.0709829	0.280426	TRUE	-0.04782	0.5877	0.9999	TRUE	-0.2166	0.01488	0.05077
ENSMUSG00000033809	Alg3	none	44.8189	0.0945442	0.811715	NA	38.6861	-0.470282	0.147769	0.594269	60.5516	-0.530326	0.0346021	0.530843	126.264	-0.229927	0.270525	0.518071	45.7342	0.25799	0.604145	0.84835	TRUE	0.03058	0.8761	0.9999	TRUE	0.03521	0.8249	0.9048
ENSMUSG00000036632	Alg5	none	86.9052	-0.0397063	0.893597	NA	111.231	0.288276	0.155857	0.608871	70.3634	0.0106076	0.964741	0.997183	225.484	0.516479	0.00185691	0.0144622	162.514	0.978915	0.0014747	0.0169335	TRUE	-0.03371	0.8297	0.9999	TRUE	0.2189	0.09884	0.2203
ENSMUSG00000073792	Alg6	none	63.8059	-0.0800683	0.812463	NA	82.4319	-0.0164219	0.945411	0.990295	86.8405	-0.216305	0.385293	0.957654	109.147	-0.980589	6.0647e-06	0.000104187	46.9445	0.427585	0.370654	0.698139	TRUE	-0.0773	0.6415	0.9999	TRUE	0.1316	0.336	0.5258
ENSMUSG00000035704	Alg8	none	47.3557	-0.291178	0.455317	NA	42.4029	-0.435428	0.163993	0.622474	33.028	-0.390096	0.225398	0.898802	106.264	-0.17127	0.444381	0.682295	83.4509	0.364398	0.339868	0.671566	TRUE	0.1593	0.4105	0.9999	TRUE	0.1401	0.3965	0.5844
ENSMUSG00000032059	Alg9	none	114.838	-0.297245	0.249766	0.639404	133.747	-0.384495	0.0488279	0.364206	100.885	-0.357785	0.0997465	0.755232	144.992	-0.558329	0.00842286	0.0489198	50.7341	0.422748	0.359108	0.690023	TRUE	0.1409	0.3088	0.9999	TRUE	-0.1836	0.1453	0.2923
ENSMUSG00000055471	Alk	none	29.8857	-0.465253	0.33567	NA	27.8471	0.0897979	0.816554	0.96915	101.863	-0.335815	0.150063	0.832465	24.8181	-0.0078343	0.983231	0.992196	8.07475	-1.24132	0.264575	0.596232	TRUE	-0.2023	0.3393	0.9999	TRUE	-0.6498	0.0008656	0.004599
ENSMUSG00000054204	Alkal2	none	8.45797	-0.0610121	0.945581	NA	4.11466	0.50805	0.609749	NA	15.7207	-0.205999	0.644129	0.991361	5.27166	0.844343	0.275626	0.524017	NA	NA	NA	NA	NA	NA	NA	NA	NA	NA	NA	NA
ENSMUSG00000079036	Alkbh1	none	39.3263	0.0755114	0.865747	NA	42.9093	0.133392	0.681527	0.935461	27.8758	-0.377322	0.290742	0.936002	22.7692	-0.0323742	0.932425	0.97452	8.63753	0.214197	0.839772	0.953533	TRUE	-0.03612	0.8319	0.9999	TRUE	-0.1099	0.4525	0.6367
ENSMUSG00000044339	Alkbh2	none	9.25553	-0.436095	0.607553	NA	7.23112	0.384864	0.631242	NA	5.82207	-0.465162	0.526461	0.979024	7.70441	0.554643	0.398276	0.641882	9.99953	2.13132	0.0510709	0.223545	TRUE	-0.04253	0.8746	0.9999	TRUE	-0.03684	0.8848	0.9405
ENSMUSG00000040174	Alkbh3	none	33.7556	0.239311	0.605732	NA	20.5367	0.550679	0.269539	0.736609	44.1643	0.0221088	0.937323	0.995591	37.6708	0.830298	0.0112392	0.0607998	32.6554	1.15692	0.0465782	0.209813	TRUE	-0.08769	0.6435	0.9999	TRUE	0.4493	0.00178	0.00859
ENSMUSG00000039754	Alkbh4	none	16.1387	0.344391	0.599768	NA	15.7837	-0.142327	0.783082	0.961151	17.0175	-0.222594	0.606521	0.989253	11.65	0.116336	0.828301	0.924537	9.89623	-0.0290534	0.975881	0.992081	TRUE	0.0684	0.768	0.9999	TRUE	0.1545	0.5184	0.6925
ENSMUSG00000042650	Alkbh5	none	145.424	0.216968	0.389548	0.743692	79.1921	0.067432	0.782829	0.961151	120.546	-0.0732672	0.70728	0.992723	194.522	0.10207	0.595472	0.792844	78.5731	0.479046	0.223537	0.547275	TRUE	0.111	0.2529	0.9999	TRUE	-0.05413	0.5387	0.7087
ENSMUSG00000042831	Alkbh6	none	101.712	-0.0469552	0.863218	0.964324	85.9924	-0.32369	0.20166	0.671423	88.3913	0.212197	0.369068	0.956332	66.9623	-0.375035	0.118827	0.315481	26.4028	0.622105	0.318235	0.651054	TRUE	-0.09324	0.5774	0.9999	TRUE	-0.1298	0.3099	0.4994
ENSMUSG00000002661	Alkbh7	none	73.4021	-0.150937	0.63396	NA	52.7155	-0.210988	0.4482	0.856321	83.5355	-0.236289	0.306334	0.939405	69.8315	-0.651345	0.00877267	0.0506424	18.9628	0.407619	0.570417	0.831454	TRUE	0.2433	0.3311	0.9999	TRUE	-0.1069	0.6256	0.7752
ENSMUSG00000025899	Alkbh8	none	199.651	-0.306197	0.150726	0.514417	225.225	0.0484608	0.762263	0.956848	116.092	-0.124809	0.533656	0.979472	119.618	-0.0341845	0.861431	0.942071	27.106	0.00714775	0.990657	0.997014	TRUE	0.07722	0.6497	0.9999	TRUE	0.1374	0.4329	0.619
ENSMUSG00000063810	Alms1	none	76.6212	0.173707	0.594609	NA	52.2276	0.192523	0.522329	0.884031	160.934	-0.118886	0.527445	0.979024	56.8007	-0.943392	0.00101806	0.00888917	20.9181	-0.885172	0.219493	0.542935	TRUE	0.4487	0.03365	0.621	TRUE	-0.02945	0.8833	0.9395
ENSMUSG00000032807	Alox12b	none	40.9507	0.201467	0.635746	NA	74.6645	-0.421319	0.0847068	0.480434	NA	NA	NA	NA	6.314	-0.863999	0.232353	0.473665	NA	NA	NA	NA	TRUE	0.6253	0.004049	0.2194	TRUE	-0.5062	0.0033	0.01465
ENSMUSG00000060063	Alox5ap	none	8.53676	0.997011	0.309646	NA	4.65667	-0.287729	0.753386	NA	10.3692	0.418765	0.47348	0.972545	4.63829	1.00366	0.227488	0.467757	394.378	-1.04999	1.14418e-05	0.000276623	TRUE	0.406	0.1597	0.9659	TRUE	0.9118	1.711e-05	0.0001381
ENSMUSG00000020891	Alox8	none	21.0777	0.422928	0.462523	NA	27.7832	-0.327935	0.384835	0.820486	39.3563	0.468144	0.121964	0.79272	10.7348	-0.407831	0.464303	0.699823	NA	NA	NA	NA	TRUE	-0.2008	0.296	0.9999	TRUE	-0.3853	0.03227	0.09427
ENSMUSG00000020892	Aloxe3	none	26.688	0.414518	0.428932	NA	33.5488	-0.231844	0.517291	0.881738	8.55805	0.40666	0.522412	0.977956	9.61562	0.374937	0.549075	0.760692	NA	NA	NA	NA	TRUE	-0.08002	0.6805	0.9999	TRUE	0.04451	0.841	0.9143
ENSMUSG00000028028	Alpk1	none	NA	NA	NA	NA	7.60862	0.651541	0.37214	NA	NA	NA	NA	NA	27.1131	-0.61646	0.0923769	0.267771	13.4982	1.28113	0.157307	0.458422	TRUE	-0.09554	0.6002	0.9999	TRUE	0.447	0.002771	0.01259
ENSMUSG00000028766	Alpl	none	8.62379	1.52413	0.106096	NA	NA	NA	NA	NA	4.74909	1.01373	0.2228	0.897824	238.564	-1.28647	1.90788e-10	7.1488e-09	7.61138	-1.23873	0.289302	0.622192	TRUE	0.09404	0.7186	0.9999	TRUE	-0.9876	0.0001453	0.0009534
ENSMUSG00000026024	Als2	none	266.603	0.137086	0.472185	0.794363	340.93	0.202814	0.134033	0.574133	283.954	-0.451348	0.00332779	0.22432	200.822	-0.262352	0.135261	0.341182	71.7567	-0.170935	0.66775	0.884128	TRUE	0.1355	0.164	0.9733	TRUE	-0.2325	0.01733	0.05752
ENSMUSG00000025134	Alyref	none	183.01	0.18644	0.383385	0.740731	202.076	-0.175786	0.332005	0.782212	135.763	-0.120161	0.509303	0.977729	138.112	-0.233849	0.22126	0.460284	91.3754	-0.479818	0.199591	0.521009	TRUE	0.1242	0.4787	0.9999	TRUE	-0.01427	0.9239	0.9623
ENSMUSG00000060244	Alyref2	none	22.1282	0.083015	0.888824	NA	28.1014	0.4564	0.236862	0.706867	19.8917	0.527907	0.207374	0.887528	27.5299	-0.33882	0.369468	0.615895	20.9084	0.200727	0.774085	0.927126	TRUE	-0.04633	0.8738	0.9999	TRUE	0.1925	0.5099	0.6867
ENSMUSG00000022244	Amacr	none	57.5922	-0.0584051	0.875185	NA	76.7576	-0.255084	0.308006	0.762831	37.7812	-0.043518	0.891182	0.994132	58.8797	-0.158745	0.534112	0.751008	12.9236	0.35337	0.69093	0.894741	TRUE	-0.05235	0.7929	0.9999	TRUE	0.05733	0.7425	0.8549
ENSMUSG00000040506	Ambra1	none	456.542	0.418978	0.00875847	0.127868	458.51	0.262301	0.0899106	0.488971	203.799	0.273272	0.0892714	0.731814	136.458	-0.0315464	0.871623	0.947411	88.188	-0.498183	0.174896	0.487694	TRUE	-0.08353	0.3751	0.9999	TRUE	-0.03037	0.7211	0.8412
ENSMUSG00000036820	Amdhd2	none	30.3041	0.516716	0.284676	NA	28.495	0.132246	0.728759	0.948749	18.6479	0.103948	0.807056	0.994132	22.4384	0.112776	0.770292	0.896884	48.7317	1.1099	0.0236567	0.132315	TRUE	-0.2619	0.1817	0.9878	TRUE	0.5228	0.001787	0.008623
ENSMUSG00000050332	Amer1	none	32.5307	-0.415729	0.369038	NA	25.0395	-0.351886	0.381944	0.818818	31.4605	-0.127848	0.707111	0.992723	11.381	-0.294787	0.584504	0.785943	6.38233	0.282763	0.813212	0.941659	NA	NA	NA	NA	NA	NA	NA	NA
ENSMUSG00000021986	Amer2	none	177.982	0.282841	0.199587	0.583168	158.616	-0.0874793	0.651401	0.929812	114.875	-0.48195	0.019475	0.4438	281.385	-1.13208	3.14791e-12	1.4312e-10	9.95071	-0.429142	0.656409	0.87712	NA	NA	NA	NA	NA	NA	NA	NA
ENSMUSG00000045174	Amer3	none	248.443	0.0407659	0.837054	0.957086	298.603	0.214665	0.127401	0.565627	74.7398	0.12554	0.602945	0.988891	33.1662	0.052467	0.886598	0.954444	5.62973	-3.01225	0.029818	0.156495	NA	NA	NA	NA	NA	NA	NA	NA
ENSMUSG00000031751	Amfr	none	1006.02	-0.0726943	0.560519	0.843034	1009.76	-0.162347	0.153635	0.603891	1044.46	-0.25175	0.0695341	0.67799	2798.94	-0.195025	0.217399	0.455248	512.173	-0.0478419	0.83932	0.953292	TRUE	0.005078	0.9545	0.9999	TRUE	0.02872	0.7584	0.8639
ENSMUSG00000050947	Amigo1	none	353.682	-0.0455077	0.785779	0.942148	259.087	-0.236332	0.117172	0.547711	356.77	-0.248095	0.0815285	0.712637	253.159	-0.921728	5.40135e-08	1.43061e-06	26.1132	-1.90446	0.00398425	0.0367841	TRUE	-0.03598	0.6919	0.9999	TRUE	-0.5509	1.393e-10	2.202e-09
ENSMUSG00000048218	Amigo2	none	24.52	-0.0123347	0.982315	NA	63.2295	-0.0150541	0.954939	0.991677	37.0438	0.0454484	0.882424	0.994132	199.392	-0.369081	0.067041	0.215558	NA	NA	NA	NA	TRUE	0.2019	0.1184	0.9198	TRUE	-0.2011	0.07554	0.1804
ENSMUSG00000042225	Ammecr1	none	NA	NA	NA	NA	NA	NA	NA	NA	NA	NA	NA	NA	3.24524	1.47249	0.159058	0.378389	5.31852	0.123886	0.92381	0.98205	TRUE	-0.006688	0.9822	0.9999	TRUE	0.1883	0.526	0.6989
ENSMUSG00000041915	Ammecr1l	none	74.3467	-0.0928008	0.774798	NA	62.9916	-0.0600762	0.814818	0.968714	78.8228	-0.0201136	0.92888	0.99529	127.805	-0.0060685	0.975226	0.990114	41.2676	0.735061	0.149675	0.445658	TRUE	0.07571	0.493	0.9999	TRUE	0.07024	0.5005	0.6788
ENSMUSG00000021278	Amn	none	27.3775	-0.357104	0.489934	NA	9.00722	-0.289794	0.676131	NA	5.45989	-0.344803	0.655298	0.991361	NA	NA	NA	NA	NA	NA	NA	NA	TRUE	-0.4294	0.3629	0.9999	TRUE	0.1282	0.7443	0.8562
ENSMUSG00000068250	Amn1	none	130.264	-0.563842	0.0311423	0.250038	162.699	0.0340826	0.854698	0.976808	96.412	0.306746	0.199616	0.882106	187.549	-0.0143411	0.938596	0.977499	18.5899	0.491562	0.539807	0.818054	TRUE	0.1095	0.5873	0.9999	TRUE	0.04304	0.8169	0.8993
ENSMUSG00000041688	Amot	none	60.0161	-0.150161	0.680919	NA	55.6596	-0.0229378	0.933892	0.988451	82.9522	-0.518436	0.0247456	0.475115	305.583	-0.561388	0.000412654	0.00411962	12.1435	-2.82801	0.00279715	0.027829	TRUE	0.2086	0.05805	0.7677	TRUE	0.03605	0.7317	0.8473
ENSMUSG00000013076	Amotl1	none	49.8051	0.222608	0.569009	NA	6.0953	-0.0187016	0.983125	NA	47.4344	0.381808	0.182219	0.864213	197.591	0.894809	2.06827e-06	3.96139e-05	52.2283	-0.161787	0.720252	0.907029	TRUE	0.2208	0.2187	0.9954	TRUE	0.757	5.65e-12	1.027e-10
ENSMUSG00000032531	Amotl2	none	32.3747	-0.251193	0.586588	NA	5.43971	-0.220201	0.795153	NA	37.0284	0.375276	0.237825	0.908037	48.5218	0.277403	0.330961	0.580998	9.10826	-2.43102	0.0315138	0.163097	TRUE	-0.01033	0.9452	0.9999	TRUE	0.7113	3.711e-06	3.377e-05
ENSMUSG00000027889	Ampd2	none	262.043	-0.160074	0.397584	0.749567	501.008	0.498459	0.00032447	0.0157503	156.349	0.280655	0.120842	0.792591	113.412	-0.343269	0.0918753	0.26675	42.5467	-0.561034	0.269893	0.60166	TRUE	-0.0663	0.5005	0.9999	TRUE	-0.01616	0.8675	0.9305
ENSMUSG00000005686	Ampd3	none	47.6474	0.0555462	0.886321	NA	24.7213	0.0119515	0.978655	0.995162	62.8603	0.284526	0.258575	0.918876	238.279	1.49129	1.30383e-15	8.34685e-14	34.8483	-0.8619	0.117136	0.384718	TRUE	0.04725	0.6684	0.9999	TRUE	1.23	8.362e-28	4.19e-26
ENSMUSG00000021314	Amph	none	2192.63	0.0995366	0.363136	0.726376	2390.14	0.0658771	0.471366	0.864283	1294.57	-0.0512392	0.668424	0.991361	396.018	-0.312625	0.0643336	0.209591	45.0737	-1.42254	0.00363306	0.0342583	TRUE	-0.03696	0.7095	0.9999	TRUE	-0.2147	0.03844	0.1085
ENSMUSG00000032607	Amt	none	36.1566	0.367574	0.406756	NA	7.58182	0.678265	0.36848	NA	12.5836	0.206869	0.699876	0.992723	221.444	-0.266138	0.143819	0.355021	NA	NA	NA	NA	TRUE	0.2687	0.04245	0.6842	TRUE	-0.03758	0.792	0.884
ENSMUSG00000050022	Amz1	none	32.589	1.11941	0.0199858	NA	10.6415	-0.320191	0.628542	NA	5.58359	0.277033	0.716719	0.993124	20.0266	0.893294	0.034493	0.138633	56.0368	1.14113	0.0159276	0.100138	TRUE	-0.1462	0.5417	0.9999	TRUE	1.103	3.255e-10	4.972e-09
ENSMUSG00000020610	Amz2	none	138.891	-0.097132	0.684886	0.90307	196.133	0.0266615	0.868835	0.9775	87.6991	-0.157424	0.509774	0.977729	116.817	0.0472545	0.82263	0.92297	33.7737	0.895907	0.114164	0.379242	TRUE	0.1012	0.3003	0.9999	TRUE	-0.2754	0.00407	0.01752
ENSMUSG00000014355	Anapc1	none	475.416	0.198473	0.21513	0.60189	828.6	0.402731	0.000421151	0.0192309	378.424	0.23128	0.0964639	0.749678	407.91	-0.0290505	0.854241	0.938023	142.552	-0.531942	0.0890869	0.32442	TRUE	-0.02255	0.8001	0.9999	TRUE	-0.02359	0.8134	0.897
ENSMUSG00000036977	Anapc10	none	87.6933	0.145058	0.618943	NA	110.769	0.0266561	0.902166	0.982131	98.5833	0.0937439	0.701846	0.992723	153.125	0.25044	0.207569	0.443006	36.9764	0.35293	0.516354	0.8027	TRUE	0.1108	0.5719	0.9999	TRUE	0.05749	0.7628	0.8671
ENSMUSG00000025135	Anapc11	none	281.546	0.140816	0.446457	0.779228	222.78	0.0114836	0.943161	0.99014	230.36	-0.0351788	0.822276	0.994132	381.213	0.0924254	0.571639	0.77662	150.997	-0.0962907	0.754868	0.919673	TRUE	0.01719	0.8975	0.9999	TRUE	-0.05668	0.6524	0.7938
ENSMUSG00000035048	Anapc13	none	87.8481	0.421295	0.157526	NA	68.7844	-0.128559	0.623426	0.921673	122.145	-0.0659104	0.729664	0.994132	259.699	0.380924	0.0238278	0.105707	149.598	0.467275	0.160702	0.463717	TRUE	0.2009	0.2489	0.9999	TRUE	-0.1667	0.2833	0.4686
ENSMUSG00000030649	Anapc15	none	23.7215	-0.294204	0.58618	NA	12.2088	-0.212101	0.715371	0.945399	12.8909	0.501494	0.331106	0.947673	23.3471	0.741971	0.0494777	0.176498	19.8964	0.141501	0.846204	0.955994	NA	NA	NA	NA	NA	NA	NA	NA
ENSMUSG00000020107	Anapc16	none	122.878	0.125488	0.617322	0.869864	142.358	-0.357676	0.0720647	0.446867	84.8279	-0.0240834	0.912664	0.994132	236.74	-0.262266	0.123466	0.322997	72.1795	0.151664	0.710497	0.903629	TRUE	0.09083	0.3889	0.9999	TRUE	-0.03997	0.7077	0.8327
ENSMUSG00000026965	Anapc2	none	618.285	0.147021	0.322615	0.696613	496.211	-0.0531732	0.663156	0.933997	357.784	0.244968	0.127224	0.798348	387.565	0.164746	0.275497	0.523878	190.049	0.107988	0.740279	0.913551	TRUE	0.02657	0.7814	0.9999	TRUE	-0.04818	0.5798	0.7422
ENSMUSG00000029176	Anapc4	none	486.657	-0.0125387	0.935199	0.9845	726.884	0.243897	0.04354	0.344535	501.537	0.0272342	0.855255	0.994132	462.336	0.333246	0.0853228	0.255039	178.767	-0.0226591	0.941923	0.986757	TRUE	-0.03323	0.7504	0.9999	TRUE	0.00879	0.9269	0.9645
ENSMUSG00000029472	Anapc5	none	480.044	-0.0409386	0.797877	0.946696	416.49	-0.0885188	0.52345	0.884031	236.597	-0.0524074	0.746937	0.994132	351.863	0.100858	0.521895	0.741425	132.638	-0.111566	0.727223	0.909126	TRUE	-0.0337	0.7241	0.9999	TRUE	-0.1945	0.04134	0.1148
ENSMUSG00000029466	Anapc7	none	341.8	0.280145	0.104089	0.442135	317.537	0.0430365	0.771752	0.959134	170.519	-0.0132647	0.938404	0.995591	112.585	0.0270301	0.90016	0.960727	62.5502	0.260641	0.541528	0.819199	TRUE	-0.04304	0.6954	0.9999	TRUE	0.02255	0.8313	0.908
ENSMUSG00000021257	Angel1	none	35.5845	0.339997	0.473729	NA	30.0018	-0.0249396	0.94681	0.990609	32.727	0.379338	0.242502	0.909747	38.1178	0.403393	0.211655	0.448373	14.352	-0.63027	0.432022	0.747606	TRUE	-0.3557	0.05078	0.7275	TRUE	0.02823	0.8489	0.9194
ENSMUSG00000026634	Angel2	none	118.989	0.0155594	0.951226	0.989708	143.814	0.0662242	0.714504	0.945399	54.8163	-0.181698	0.48663	0.974617	90.6664	0.252756	0.247426	0.492088	49.9203	0.197762	0.671629	0.886015	TRUE	-0.005154	0.9566	0.9999	TRUE	0.05388	0.5763	0.7398
ENSMUSG00000022309	Angpt1	none	51.4485	0.17227	0.659794	NA	10.8659	-1.70234	0.0236157	NA	23.1053	-0.431063	0.285381	0.932376	541.1	1.06602	8.70744e-11	3.42444e-09	5.53086	0.0457735	0.971237	0.991725	TRUE	0.3161	0.1931	0.9878	TRUE	1.91	2.442e-26	1.135e-24
ENSMUSG00000033544	Angptl1	none	NA	NA	NA	NA	6.38849	1.19762	0.146392	NA	6.38525	0.586618	0.402763	0.957669	28.3873	1.74729	3.36141e-05	0.000477013	NA	NA	NA	NA	TRUE	-0.3189	0.45	0.9999	TRUE	0.6197	0.03271	0.09527
ENSMUSG00000038742	Angptl6	none	28.097	-0.106971	0.828737	NA	27.2938	-0.203741	0.627974	0.923923	6.05179	-0.172515	0.811667	0.994132	22.0217	-0.327261	0.401375	0.644893	5.07819	-0.0520128	0.972602	0.991725	TRUE	-0.2302	0.3837	0.9999	TRUE	-0.4156	0.07974	0.1881
ENSMUSG00000022265	Ank	none	1004.91	-0.0390967	0.768731	0.937383	596.479	-0.162869	0.175709	0.638528	574.608	0.00728314	0.953898	0.995591	1212.7	0.511886	0.00056975	0.00540808	334.891	2.27191	4.15911e-16	5.76423e-14	TRUE	-0.02657	0.7836	0.9999	TRUE	0.04984	0.5964	0.7538
ENSMUSG00000031543	Ank1	none	135.916	0.0858825	0.723255	0.91819	80.0609	-0.465738	0.0953572	0.503883	1805.48	-0.395025	0.00209476	0.179647	76.698	-0.228197	0.315732	0.566113	52.652	-2.23214	7.88343e-06	0.000196593	TRUE	-0.09338	0.5411	0.9999	TRUE	-0.6502	4.251e-07	4.486e-06
ENSMUSG00000032826	Ank2	none	4478.43	0.0623573	0.55517	0.84021	4815.18	-0.0341049	0.768334	0.958821	6823.07	-0.0970122	0.398984	0.957654	4427.86	-0.691596	7.776e-07	1.64459e-05	381.664	-1.41905	2.12715e-06	6.26013e-05	TRUE	-0.01431	0.9083	0.9999	TRUE	-0.04659	0.7166	0.8381
ENSMUSG00000069601	Ank3	none	2459.15	0.100124	0.372491	0.731847	2706.87	0.126827	0.332224	0.782379	2721.51	-0.131234	0.267844	0.922347	517.406	-0.382409	0.0131155	0.0677905	175.381	-2.14991	1.00615e-08	4.99681e-07	TRUE	0.04663	0.6562	0.9999	TRUE	-0.2929	0.006389	0.0256
ENSMUSG00000066510	Ankdd1a	none	6.69888	-0.301431	0.767319	NA	9.04367	0.348757	0.622238	NA	NA	NA	NA	NA	NA	NA	NA	NA	NA	NA	NA	NA	NA	NA	NA	NA	NA	NA	NA	NA
ENSMUSG00000047773	Ankfn1	none	73.4512	-0.119166	0.713453	NA	3.94443	0.793428	0.481066	NA	17.2467	-0.156326	0.743023	0.994132	17.6261	-0.406699	0.344735	0.593283	NA	NA	NA	NA	TRUE	-0.3401	0.5764	0.9999	TRUE	0.8917	0.03679	0.1048
ENSMUSG00000020790	Ankfy1	none	254.643	0.113255	0.549016	0.835738	301.246	0.0162935	0.908847	0.983695	122.703	-0.0726977	0.705221	0.992723	308.504	-0.015333	0.924224	0.971511	271.447	-0.118388	0.676943	0.888703	TRUE	0.06468	0.4689	0.9999	TRUE	0.1018	0.2747	0.4584
ENSMUSG00000024483	Ankhd1	none	527.744	-0.168188	0.26434	0.653569	607.144	0.0274169	0.828554	0.970437	525.55	-0.0467472	0.713454	0.992897	286.443	-0.672313	0.000177945	0.00201935	194.509	-0.0836303	0.76785	0.924853	TRUE	0.1453	0.1868	0.9878	TRUE	0.02625	0.8323	0.9086
ENSMUSG00000040351	Ankib1	none	145.676	0.222818	0.340972	0.710689	175.798	0.412876	0.0195389	0.225897	78.437	0.236839	0.31313	0.939405	262.276	0.239282	0.203989	0.438247	64.1538	-0.0641028	0.877198	0.967458	TRUE	0.0642	0.498	0.9999	TRUE	0.05252	0.5804	0.7426
ENSMUSG00000029501	Ankle2	none	327.417	-0.152223	0.394145	0.746834	463.353	-0.0583475	0.636757	0.926634	231.14	-0.118032	0.443507	0.965574	421.652	-0.11972	0.413526	0.655799	302.436	0.52741	0.0381314	0.184826	TRUE	0.01763	0.8617	0.9999	TRUE	0.1414	0.1867	0.3509
ENSMUSG00000036188	Ankmy2	none	489.377	0.1729	0.280218	0.668466	617.431	0.270652	0.0378902	0.320144	316.972	0.0327114	0.83626	0.994132	126.77	-0.430893	0.0309988	0.12797	45.47	-0.230924	0.640592	0.868823	TRUE	-0.1515	0.1378	0.9424	TRUE	-0.1781	0.08892	0.2039
ENSMUSG00000021661	Ankra2	none	194.832	-0.0376312	0.85698	0.962813	241.129	0.0284189	0.855411	0.976808	76.2029	0.302211	0.196853	0.878819	231.813	0.388789	0.0278031	0.117489	49.2614	-0.0630485	0.893321	0.973735	TRUE	-0.04568	0.7017	0.9999	TRUE	0.05219	0.6364	0.7822
ENSMUSG00000031508	Ankrd10	none	40.3567	0.276008	0.510523	NA	70.1031	-0.00310253	0.990064	0.997825	30.1799	0.0371576	0.916494	0.994132	24.1188	0.0500639	0.89131	0.956353	26.9702	0.290999	0.64409	0.870283	TRUE	0.1802	0.08708	0.8544	TRUE	-0.2033	0.05303	0.1385
ENSMUSG00000035569	Ankrd11	none	579.229	-0.121424	0.41445	0.76026	572.302	-0.0808235	0.511358	0.880744	189.871	-0.229328	0.165827	0.846278	168.12	-0.252499	0.169168	0.392838	98.6078	-0.224856	0.53303	0.814093	TRUE	-0.1036	0.2961	0.9999	TRUE	-0.03535	0.7273	0.8447
ENSMUSG00000034647	Ankrd12	none	821.765	-0.532411	4.83639e-05	0.0041009	918.025	-0.0378441	0.775709	0.959607	421.786	-0.0151956	0.913358	0.994132	168.828	-0.342344	0.0533851	0.185117	67.6609	0.678646	0.106845	0.363663	TRUE	0.01073	0.9279	0.9999	TRUE	0.1159	0.3125	0.5022
ENSMUSG00000041870	Ankrd13a	none	38.4902	0.556533	0.197324	NA	39.4424	-0.125037	0.705167	0.942708	86.3532	0.167486	0.485452	0.973802	86.8715	1.29912	2.96137e-08	8.1615e-07	233.001	0.157155	0.585935	0.838479	TRUE	-0.03687	0.7273	0.9999	TRUE	0.7413	2.408e-10	3.715e-09
ENSMUSG00000037907	Ankrd13b	none	97.8359	0.0891327	0.757061	0.933637	94.9463	0.138104	0.517995	0.881738	25.6446	0.241875	0.514299	0.977753	24.623	0.206319	0.575072	0.779578	NA	NA	NA	NA	TRUE	-0.15	0.2334	0.9954	TRUE	-0.1783	0.08017	0.1889
ENSMUSG00000039988	Ankrd13c	none	229.69	-0.388359	0.0639368	0.355678	271.731	0.251938	0.0877243	0.481968	153.676	-0.105779	0.577398	0.983338	297.16	-0.145903	0.363693	0.610528	47.0793	0.380476	0.433182	0.748709	TRUE	0.1316	0.2327	0.9954	TRUE	-0.1525	0.1421	0.2873
ENSMUSG00000005986	Ankrd13d	none	179.666	0.217406	0.320633	0.695168	88.4671	-0.0691988	0.768196	0.958821	83.6984	0.0489757	0.82592	0.994132	46.2464	0.124772	0.673672	0.841265	14.451	-1.00958	0.235945	0.564365	TRUE	-0.004871	0.964	0.9999	TRUE	-0.272	0.007612	0.02947
ENSMUSG00000047909	Ankrd16	none	30.1968	0.245361	0.609163	NA	24.8443	0.531159	0.225884	0.694223	13.4427	0.312657	0.532605	0.979195	13.4528	-0.346913	0.481401	0.713506	7.53213	-0.1135	0.917745	0.980161	TRUE	-0.3065	0.0209	0.507	TRUE	0.3664	0.007742	0.02986
ENSMUSG00000055204	Ankrd17	none	1201.4	-0.118466	0.347616	0.71501	1224.24	0.0134846	0.90208	0.982131	993.762	-0.0439785	0.705069	0.992723	603.217	-0.690104	2.00967e-06	3.86138e-05	225.487	-0.0585829	0.841361	0.95414	TRUE	0.09133	0.3274	0.9999	TRUE	-0.1496	0.1783	0.3391
ENSMUSG00000054708	Ankrd24	none	99.1269	0.0264746	0.923465	0.982138	47.4698	-0.42331	0.169214	0.630788	75.4969	-0.296764	0.236072	0.908037	37.633	-0.333117	0.272625	0.520319	14.0903	-0.290929	0.723348	0.907727	TRUE	0.1219	0.3311	0.9999	TRUE	-0.267	0.05203	0.1367
ENSMUSG00000007827	Ankrd26	none	161.376	-0.285086	0.214246	0.60091	128.594	-0.0066586	0.976302	0.994613	161.099	0.0414178	0.817229	0.994132	77.7163	-0.785746	0.00122228	0.0103311	39.7495	-0.169421	0.750828	0.918751	TRUE	0.1529	0.3875	0.9999	TRUE	0.007644	0.9578	0.9801
ENSMUSG00000034867	Ankrd27	none	86.7694	0.135312	0.667345	NA	71.6971	-0.472583	0.0600679	0.407626	33.8051	0.0917521	0.77628	0.994132	71.4731	-0.200148	0.409395	0.652128	31.4214	-0.288552	0.605254	0.849107	TRUE	-0.0514	0.6049	0.9999	TRUE	-0.0999	0.3055	0.4945
ENSMUSG00000014496	Ankrd28	none	379.384	-0.0965136	0.587809	0.85571	351.322	0.407878	0.00324287	0.0727328	118.593	0.0813046	0.684079	0.991399	314.03	0.631319	4.04985e-05	0.000562957	39.3984	0.624866	0.226647	0.551419	TRUE	-0.138	0.19	0.9878	TRUE	0.442	2.291e-06	2.157e-05
ENSMUSG00000057766	Ankrd29	none	61.3951	-0.190505	0.577671	NA	85.2951	-0.458801	0.0448389	0.349957	138.94	-0.0532151	0.771304	0.994132	92.2275	-0.214389	0.328245	0.578093	NA	NA	NA	NA	TRUE	0.1581	0.2111	0.9954	TRUE	-0.3576	0.005202	0.0216
ENSMUSG00000109561	Ankrd31	none	NA	NA	NA	NA	NA	NA	NA	NA	NA	NA	NA	NA	NA	NA	NA	NA	NA	NA	NA	NA	NA	NA	NA	NA	NA	NA	NA	NA
ENSMUSG00000022237	Ankrd33b	none	213.613	0.365634	0.0728495	0.375883	149.809	0.229094	0.234384	0.703346	36.7395	0.313364	0.310583	0.939405	46.715	0.0650255	0.836582	0.928479	10.6022	-1.18352	0.202499	0.524693	TRUE	-0.02851	0.8358	0.9999	TRUE	-0.1663	0.07504	0.1796
ENSMUSG00000049097	Ankrd34a	none	277.555	0.046047	0.801097	0.946876	196.539	-0.18644	0.293806	0.753491	89.3878	-0.211129	0.316109	0.940099	49.5775	-0.431983	0.129888	0.332785	NA	NA	NA	NA	TRUE	-0.3173	0.005488	0.2641	TRUE	-0.4852	0.0001197	0.0008058
ENSMUSG00000045034	Ankrd34b	none	151.235	-0.284091	0.230875	0.620757	83.228	-0.269587	0.253131	0.719946	433.397	-0.115841	0.411216	0.958839	53.899	-0.649104	0.0174036	0.0839938	8.05786	-0.407131	0.698783	0.897864	TRUE	0.09675	0.4838	0.9999	TRUE	-0.5698	0.0002918	0.001769
ENSMUSG00000047606	Ankrd34c	none	152.381	-0.585554	0.0191604	0.186284	21.456	-1.19742	0.0166365	0.204799	95.5826	-0.154259	0.473359	0.972545	19.6623	0.0459792	0.911883	0.966483	NA	NA	NA	NA	TRUE	-0.04088	0.9251	0.9999	TRUE	-1.375	0.0007433	0.004042
ENSMUSG00000038354	Ankrd35	none	54.454	-0.0561998	0.877224	NA	40.2197	-0.124358	0.69271	0.941077	20.0314	-0.00618997	0.987662	0.997356	20.1895	-0.394676	0.346524	0.59509	NA	NA	NA	NA	TRUE	-0.2127	0.2045	0.994	TRUE	0.05384	0.7254	0.8431
ENSMUSG00000050914	Ankrd37	none	25.8706	-0.706243	0.172471	NA	20.4134	-0.658884	0.162769	0.619781	12.474	-0.293729	0.561162	0.980439	11.0772	-0.201144	0.703611	0.858306	4.23169	-0.218748	0.879559	0.968807	TRUE	-0.05616	0.8532	0.9999	TRUE	-0.4679	0.09639	0.2165
ENSMUSG00000079610	Ankrd39	none	12.0166	0.0549466	0.941424	NA	5.12166	-0.332751	0.733193	NA	6.69651	0.548748	0.425621	0.962425	13.2003	0.973525	0.0593705	0.198263	7.85168	1.05373	0.34432	0.676327	TRUE	-0.02567	0.9031	0.9999	TRUE	0.1874	0.2787	0.463
ENSMUSG00000020864	Ankrd40	none	113.896	-0.130675	0.615932	0.869558	88.7645	-0.352758	0.130595	0.569708	150.598	-0.304784	0.0982541	0.751898	476.259	-0.23675	0.202251	0.435446	85.5885	0.304215	0.419665	0.737973	TRUE	0.03245	0.6969	0.9999	TRUE	0.1623	0.07449	0.1786
ENSMUSG00000041343	Ankrd42	none	69.5427	0.183153	0.584556	NA	30.8921	-0.0856478	0.827811	0.970437	35.3069	-0.00334105	0.991535	0.997896	37.4942	0.262747	0.400709	0.644494	NA	NA	NA	NA	TRUE	0.01018	0.9537	0.9999	TRUE	0.0243	0.8788	0.9369
ENSMUSG00000052331	Ankrd44	none	45.9277	0.501905	0.207096	NA	18.7423	-0.691396	0.191956	0.661587	27.5498	0.766265	0.0324962	0.523358	40.5544	0.376062	0.205861	0.440478	301.874	-0.252224	0.393927	0.714724	TRUE	0.002762	0.9878	0.9999	TRUE	0.6892	3.71e-07	3.956e-06
ENSMUSG00000044835	Ankrd45	none	262.582	-0.189577	0.326134	0.698422	197.756	-0.216616	0.175522	0.638279	125.653	-0.169939	0.376902	0.957654	88.6519	-0.0696397	0.762784	0.893975	NA	NA	NA	NA	TRUE	0.1455	0.1291	0.9354	TRUE	-0.3687	0.0009251	0.004875
ENSMUSG00000048307	Ankrd46	none	1043.73	0.0201882	0.869242	0.966086	1391.27	0.0621548	0.602326	0.914378	532.864	0.145275	0.2656	0.920672	424.16	-0.0458675	0.773411	0.899131	75.9889	0.100002	0.796952	0.93453	TRUE	0.005906	0.9502	0.9999	TRUE	-0.2623	0.006977	0.02753
ENSMUSG00000031931	Ankrd49	none	39.7231	-0.304536	0.497803	NA	49.4809	0.333298	0.250697	0.718934	12.7412	-0.419831	0.402587	0.957669	54.9514	0.53618	0.041814	0.157586	22.9822	0.681464	0.307051	0.641047	TRUE	-0.02143	0.9021	0.9999	TRUE	0.1847	0.2027	0.3721
ENSMUSG00000044864	Ankrd50	none	187.191	0.246711	0.251358	0.641399	111.676	0.5043	0.0132199	0.18014	101.079	0.069894	0.727914	0.99405	114.558	0.573719	0.00462171	0.0305744	42.3496	-0.791031	0.123185	0.394311	TRUE	0.09463	0.3912	0.9999	TRUE	0.008089	0.9439	0.973
ENSMUSG00000014498	Ankrd52	none	271.131	-0.0356948	0.846083	0.960347	180.389	-0.324617	0.0711948	0.444526	243.597	-0.0627758	0.718673	0.993124	138.597	-0.32586	0.148056	0.361431	59.4739	-0.336382	0.434556	0.749679	TRUE	0.02523	0.7895	0.9999	TRUE	-0.1261	0.1453	0.2923
ENSMUSG00000033055	Ankrd54	none	28.6126	1.06357	0.0380944	NA	19.6204	-0.37702	0.434099	0.848676	19.3873	0.372454	0.359143	0.953003	46.8472	1.02743	0.000734609	0.00672692	7.3838	0.646185	0.568468	0.830238	TRUE	0.1471	0.3759	0.9999	TRUE	0.7188	6.644e-07	6.806e-06
ENSMUSG00000049985	Ankrd55	none	NA	NA	NA	NA	5.57085	1.52028	0.0898323	NA	72.8759	0.131311	0.566266	0.982927	8.89274	-0.720077	0.24522	0.489275	NA	NA	NA	NA	TRUE	-0.1019	0.7049	0.9999	TRUE	-0.3039	0.2662	0.4493
ENSMUSG00000040183	Ankrd6	none	79.7699	-0.222123	0.463662	NA	50.5322	0.119646	0.688394	0.939384	22.3599	-0.0113198	0.977195	0.997323	78.3516	0.0993133	0.679648	0.844527	NA	NA	NA	NA	TRUE	0.1707	0.1143	0.9101	TRUE	0.1916	0.07787	0.185
ENSMUSG00000078137	Ankrd63	none	92.0886	-0.499712	0.0795973	NA	55.6407	-0.692407	0.0309717	0.285709	NA	NA	NA	NA	16.6076	-0.626246	0.192047	0.423312	NA	NA	NA	NA	NA	NA	NA	NA	NA	NA	NA	NA
ENSMUSG00000037904	Ankrd9	none	42.7566	0.255095	0.546784	NA	19.318	-0.441146	0.332179	0.782379	25.4873	0.339858	0.372737	0.956332	16.5856	0.151378	0.729634	0.874734	NA	NA	NA	NA	TRUE	-0.1276	0.6517	0.9999	TRUE	-0.09404	0.7236	0.8423
ENSMUSG00000024219	Anks1	none	24.3047	0.229629	0.672681	NA	4.13202	0.584797	0.574928	NA	25.3531	0.491976	0.171446	0.853199	162.214	-0.654887	0.000483371	0.00469749	52.3646	-0.275908	0.558646	0.826897	TRUE	0.05983	0.6276	0.9999	TRUE	0.4698	5.086e-05	0.000374
ENSMUSG00000058589	Anks1b	none	2007	-0.25868	0.0248207	0.219663	2797.98	0.0582542	0.587192	0.909308	2335.53	-0.019316	0.864297	0.994132	574.828	0.158493	0.452022	0.688767	78.0807	-1.73883	0.000631975	0.00857917	TRUE	-0.04134	0.7006	0.9999	TRUE	-0.4074	0.0002245	0.00141
ENSMUSG00000022515	Anks3	none	97.6971	0.147403	0.598126	0.859784	109.169	-0.33436	0.145791	0.590302	56.0404	0.076524	0.776531	0.994132	85.8773	0.0655743	0.777683	0.901317	27.338	-0.0626614	0.916669	0.979819	TRUE	0.03813	0.6962	0.9999	TRUE	-0.06774	0.4737	0.6556
ENSMUSG00000066191	Anks6	none	16.5272	-0.306789	0.634836	NA	10.1389	-0.540288	0.380381	NA	7.52567	-0.196743	0.766388	0.994132	14.3115	-0.0547553	0.911449	0.966346	9.193	0.0131546	0.989403	0.996326	TRUE	0.07927	0.6289	0.9999	TRUE	-0.1724	0.2384	0.4168
ENSMUSG00000026199	Ankzf1	none	31.2368	-0.376633	0.430574	NA	29.9789	0.0796275	0.828566	0.970437	15.9012	-0.197984	0.662894	0.991361	13.2102	-0.771339	0.115734	0.310275	11.7104	-0.0368642	0.966654	0.991356	TRUE	0.07216	0.4894	0.9999	TRUE	-0.05146	0.6278	0.7769
ENSMUSG00000036777	Anln	none	28.7185	0.564573	0.257451	NA	78.0258	0.462722	0.121056	0.553101	14.9415	-0.0931775	0.839807	0.994132	72.0768	0.83452	0.000635201	0.00593852	21.7803	0.101799	0.890322	0.972524	TRUE	0.5675	6.416e-07	0.0005102	TRUE	0.2361	0.06021	0.1522
ENSMUSG00000037949	Ano10	none	136.14	-0.224485	0.351233	0.717414	82.0385	-0.282048	0.230196	0.699994	99.4119	-0.224616	0.290097	0.935569	203.784	0.295026	0.0833256	0.250906	76.0961	0.222246	0.57355	0.832483	TRUE	-0.01014	0.9496	0.9999	TRUE	0.3043	0.008097	0.031
ENSMUSG00000038115	Ano2	none	19.7174	0.258955	0.671296	NA	13.2197	0.235777	0.695354	0.941077	NA	NA	NA	NA	6.89917	0.285627	0.677383	0.843611	3.93403	-6.02202	0.00349192	0.0332665	TRUE	0.2822	0.6272	0.9999	TRUE	0.4112	0.1707	0.3284
ENSMUSG00000074968	Ano3	none	1631.21	-0.452293	9.51358e-05	0.0065493	2114.23	-0.122646	0.277573	0.743815	215.688	-0.475749	0.00367159	0.237343	345.322	-0.864067	1.90242e-05	0.000286789	34.1621	-1.51352	0.0154248	0.0980238	TRUE	0.003317	0.975	0.9999	TRUE	-0.3395	0.005192	0.02157
ENSMUSG00000035189	Ano4	none	113.438	0.0428189	0.868988	0.966086	155.838	0.134084	0.494551	0.875173	136.772	0.276334	0.137604	0.815721	48.4317	0.406624	0.172466	0.397053	13.0788	-2.242	0.0136764	0.0900106	TRUE	-0.1117	0.4017	0.9999	TRUE	-0.2681	0.02607	0.07986
ENSMUSG00000055489	Ano5	none	9.47882	0.210486	0.80645	NA	21.5975	-0.419601	0.358077	0.803586	29.6694	-0.457604	0.209163	0.890571	7.93701	-0.0356179	0.953607	0.982327	NA	NA	NA	NA	TRUE	-0.08121	0.7647	0.9999	TRUE	-0.5488	0.07108	0.1721
ENSMUSG00000064210	Ano6	none	41.436	0.0221634	0.957099	NA	43.8874	-0.160295	0.615861	0.917849	31.5432	-0.0565515	0.870989	0.994132	304.735	1.5479	8.88822e-19	7.16882e-17	155.789	0.109799	0.733649	0.911078	TRUE	-0.04435	0.7215	0.9999	TRUE	0.6269	1.034e-10	1.666e-09
ENSMUSG00000034863	Ano8	none	178.032	-0.146387	0.516352	0.819542	118.983	-0.14534	0.512082	0.88127	124.274	0.202986	0.285386	0.932376	93.0226	0.514131	0.0265017	0.114149	18.9264	-1.10088	0.154405	0.452718	TRUE	-0.1773	0.1342	0.9382	TRUE	-0.01595	0.888	0.9416
ENSMUSG00000032249	Anp32a	none	1042.34	0.0518296	0.672873	0.898326	1149.98	0.111476	0.469252	0.863011	814.459	-0.0478779	0.724875	0.993854	659.655	0.0281092	0.851348	0.937046	339.926	-0.595423	0.0156736	0.0992107	TRUE	-0.02314	0.822	0.9999	TRUE	-0.2083	0.05581	0.1441
ENSMUSG00000028333	Anp32b	none	86.5248	0.219678	0.471003	NA	95.5412	-0.378169	0.121447	0.553477	46.0647	-0.808921	0.00606612	0.283762	87.611	0.333033	0.146832	0.359797	102.652	0.222422	0.539933	0.818054	TRUE	0.02052	0.8672	0.9999	TRUE	0.05095	0.6463	0.7892
ENSMUSG00000015749	Anp32e	none	759.029	-0.198966	0.144925	0.505855	734.198	0.281217	0.0165061	0.204122	440.104	0.0798888	0.566569	0.982927	909.332	-0.0736605	0.61126	0.803187	251.3	-0.213763	0.493782	0.790333	TRUE	-0.1016	0.2681	0.9999	TRUE	0.07822	0.3862	0.5747
ENSMUSG00000039062	Anpep	none	NA	NA	NA	NA	NA	NA	NA	NA	NA	NA	NA	NA	5.50321	0.384078	0.619313	0.808724	195.89	4.82668	7.38579e-27	2.25721e-24	TRUE	-0.0858	0.7243	0.9999	TRUE	0.3138	0.2116	0.3839
ENSMUSG00000033420	Antxr1	none	19.4825	0.797068	0.212128	NA	NA	NA	NA	NA	8.08967	0.225868	0.716096	0.992897	625.078	1.16614	2.27551e-10	8.35093e-09	5.59545	-0.262019	0.83368	0.951513	TRUE	0.3391	0.09595	0.8756	TRUE	1.367	6.64e-31	3.842e-29
ENSMUSG00000024659	Anxa1	none	NA	NA	NA	NA	NA	NA	NA	NA	8.12521	0.130633	0.834667	0.994132	11.5528	-0.73371	0.183707	0.411904	NA	NA	NA	NA	TRUE	-0.6162	0.09938	0.8881	TRUE	0.3128	0.3698	0.5597
ENSMUSG00000021866	Anxa11	none	380.542	-0.140325	0.490957	0.805064	558.427	0.52739	0.000801385	0.0304611	89.9855	0.218569	0.307598	0.939405	75.6457	0.489812	0.0663465	0.214048	53.2323	0.291891	0.556666	0.826059	TRUE	-0.1776	0.1301	0.9355	TRUE	-0.05582	0.6469	0.7894
ENSMUSG00000032231	Anxa2	none	26.7453	0.511456	0.317917	NA	5.63912	0.613119	0.484244	NA	36.9682	0.438709	0.154648	0.836211	180.643	2.63344	2.10064e-29	3.36952e-27	78.9684	2.89859	3.33143e-10	2.02588e-08	TRUE	0.4668	0.01649	0.4622	TRUE	2.027	3.747e-32	2.298e-30
ENSMUSG00000029484	Anxa3	none	15.7601	0.966801	0.162143	NA	3.88759	0.41852	0.688833	NA	10.5694	0.911295	0.129527	0.802175	65.7523	4.41134	2.26637e-26	2.88881e-24	1323.7	0.046142	0.847854	0.956602	TRUE	-0.1088	0.5639	0.9999	TRUE	2.078	2.211e-43	2.133e-41
ENSMUSG00000029994	Anxa4	none	20.154	0.0260114	0.964412	NA	12.0036	0.02124	0.972676	NA	26.0097	0.673543	0.0644778	0.665047	124.87	1.86822	3.42223e-18	2.55919e-16	312.932	2.31713	1.30654e-15	1.67448e-13	TRUE	0.2349	0.4209	0.9999	TRUE	1.902	2.18e-22	8.016e-21
ENSMUSG00000027712	Anxa5	none	217.802	-0.0597323	0.770421	0.937801	53.7361	-0.406762	0.193369	0.662277	530.782	0.31157	0.0174673	0.4354	1728.76	0.905385	1.59807e-11	6.81017e-10	850.866	2.23223	3.24178e-20	6.89978e-18	TRUE	0.2006	0.1179	0.9172	TRUE	1.722	9.87e-46	1.023e-43
ENSMUSG00000018340	Anxa6	none	1084.53	0.155232	0.219584	0.606812	1047.97	-0.0926765	0.407353	0.832154	1076.48	0.19385	0.13473	0.812167	545.29	-0.0434897	0.781207	0.902283	253.036	0.0503493	0.8502	0.956891	TRUE	-0.02247	0.8174	0.9999	TRUE	-0.1153	0.2684	0.4515
ENSMUSG00000021814	Anxa7	none	816.982	-0.148093	0.273722	0.661978	781.113	-0.244973	0.0253253	0.26054	319.455	0.184922	0.247507	0.914752	238.13	0.231562	0.217681	0.455462	164.295	0.551462	0.0733659	0.286062	TRUE	0.08077	0.432	0.9999	TRUE	-0.08917	0.3427	0.5321
ENSMUSG00000021458	Aopep	none	79.945	0.137062	0.661947	NA	56.9016	0.46807	0.10183	0.51493	35.5985	0.00780989	0.982159	0.997323	23.6076	0.478616	0.206053	0.440756	17.8765	1.94994	0.0157983	0.0996821	NA	NA	NA	NA	NA	NA	NA	NA
ENSMUSG00000063558	Aox1	none	4.34561	0.421117	0.748569	NA	NA	NA	NA	NA	NA	NA	NA	NA	68.668	-0.0251551	0.916245	0.968482	NA	NA	NA	NA	TRUE	-0.009966	0.9687	0.9999	TRUE	0.7888	1.381e-08	1.751e-07
ENSMUSG00000038242	Aox4	none	7.82638	0.282437	0.762057	NA	NA	NA	NA	NA	NA	NA	NA	NA	NA	NA	NA	NA	NA	NA	NA	NA	TRUE	-0.09595	0.8104	0.9999	TRUE	0.5403	0.118	0.2515
ENSMUSG00000074238	Ap1ar	none	146.407	-0.0705451	0.772992	0.938305	163.267	-0.291064	0.110771	0.533401	111.516	-0.120052	0.543521	0.980148	80.4369	-0.00198906	0.993152	0.996642	24.4752	-0.851655	0.179705	0.493412	TRUE	-0.03715	0.6845	0.9999	TRUE	-0.326	0.0002653	0.001624
ENSMUSG00000009090	Ap1b1	none	1916.37	0.222044	0.0430057	0.293731	1637.26	-0.125236	0.21147	0.68055	1178.57	0.2012	0.181564	0.862867	541.054	-0.120032	0.420284	0.661081	343.159	-0.454302	0.0948592	0.338575	TRUE	-0.04246	0.6745	0.9999	TRUE	0.008636	0.9304	0.9662
ENSMUSG00000031731	Ap1g1	none	821.22	-0.213669	0.121907	0.47703	1075.18	0.116514	0.29387	0.753491	517.596	0.107719	0.392795	0.957654	358.334	-0.365065	0.0174512	0.0841099	241.946	0.0784426	0.769071	0.925634	TRUE	0.1009	0.2518	0.9999	TRUE	-0.2561	0.007107	0.02791
ENSMUSG00000003033	Ap1m1	none	406.561	0.0298556	0.851018	0.962157	398.32	0.0628493	0.625514	0.92281	175.998	0.257782	0.144391	0.825377	142.234	0.238657	0.249944	0.495562	74.5875	-0.359599	0.371974	0.69951	TRUE	-0.02002	0.8438	0.9999	TRUE	-0.03481	0.6953	0.8234
ENSMUSG00000003309	Ap1m2	none	NA	NA	NA	NA	NA	NA	NA	NA	NA	NA	NA	NA	NA	NA	NA	NA	NA	NA	NA	NA	TRUE	0.0953	0.8541	0.9999	TRUE	0.07084	0.8796	0.9372
ENSMUSG00000004849	Ap1s1	none	1386.88	0.18563	0.126916	0.483477	1271.57	0.258395	0.0457834	0.35335	347.615	-0.0485586	0.723051	0.993823	614.965	0.362898	0.0117436	0.0626503	160.636	0.488293	0.111611	0.373197	TRUE	-0.03027	0.7832	0.9999	TRUE	0.1778	0.1052	0.2304
ENSMUSG00000031367	Ap1s2	none	221.955	-0.622717	0.00173734	0.0471863	339.45	-0.336225	0.0404491	0.331941	402.417	-0.17848	0.197956	0.87891	158.045	-0.247887	0.207719	0.44306	281.353	0.384112	0.188215	0.504688	TRUE	0.4504	0.07084	0.8171	TRUE	0.0187	0.9069	0.9528
ENSMUSG00000054702	Ap1s3	none	9.70243	-0.0241801	0.976906	NA	NA	NA	NA	NA	NA	NA	NA	NA	4.10264	-1.42571	0.114125	0.307693	NA	NA	NA	NA	TRUE	0.2043	0.5269	0.9999	TRUE	-0.6226	0.04556	0.1238
ENSMUSG00000060279	Ap2a1	none	2422.79	0.282288	0.0118947	0.146379	1585.1	0.174004	0.103001	0.517344	1273.3	0.030245	0.820602	0.994132	682.91	0.0369366	0.812468	0.91814	184.404	-0.509503	0.11806	0.386535	TRUE	-0.1043	0.4293	0.9999	TRUE	-0.01415	0.9086	0.9537
ENSMUSG00000002957	Ap2a2	none	2759.37	0.221586	0.0496614	0.318851	3543.34	0.306663	0.00205759	0.054632	1462.32	0.0602514	0.591333	0.98703	937.29	-0.0631029	0.669842	0.83916	209.261	-0.971123	0.000695197	0.00927889	TRUE	-0.003231	0.9769	0.9999	TRUE	0.152	0.1814	0.3433
ENSMUSG00000035152	Ap2b1	none	4993.59	-0.000662576	0.995632	0.999806	8367.23	0.25775	0.00625552	0.113321	2883.09	0.190575	0.0888958	0.731814	1264.45	-0.0658899	0.65275	0.829652	425.662	-0.191053	0.417819	0.735908	TRUE	0.01176	0.9242	0.9999	TRUE	-0.2416	0.04326	0.1188
ENSMUSG00000022841	Ap2m1	none	186.35	-0.0624144	0.779088	0.941	211.376	0.342969	0.0713731	0.444787	83.5566	0.301791	0.160005	0.842567	66.3442	0.196435	0.434572	0.675075	32.5875	-0.471343	0.392488	0.713558	TRUE	-0.04889	0.6273	0.9999	TRUE	-0.1813	0.07881	0.1866
ENSMUSG00000008036	Ap2s1	none	1787.68	-0.160476	0.146921	0.509242	1885.37	0.0568555	0.573014	0.905046	842.867	0.244579	0.0466186	0.593177	1131.98	0.313061	0.0209555	0.0963254	296.427	0.352241	0.177088	0.489725	TRUE	-0.1215	0.3142	0.9999	TRUE	0.04499	0.7452	0.8566
ENSMUSG00000021686	Ap3b1	none	421.764	-0.352065	0.0252515	0.221126	569.45	-0.0177441	0.886486	0.980844	176.195	0.234569	0.182902	0.865245	194.334	-0.2135	0.234924	0.476763	193.993	0.183865	0.52097	0.805584	TRUE	0.104	0.2802	0.9999	TRUE	-0.1432	0.1754	0.335
ENSMUSG00000062444	Ap3b2	none	1521.04	-0.0219087	0.848902	0.961149	1756.67	0.0333668	0.753416	0.953744	564.267	0.218548	0.108288	0.768394	294.734	-0.410043	0.0223488	0.100838	59.954	-2.7055	2.97069e-07	1.12049e-05	TRUE	-0.03638	0.7099	0.9999	TRUE	-0.246	0.008661	0.03273
ENSMUSG00000020198	Ap3d1	none	1466.04	0.136951	0.251452	0.641399	1234.59	0.0252733	0.800461	0.966666	662.862	-0.00377893	0.979318	0.997323	733.07	-0.113798	0.475946	0.709175	322.157	-0.219394	0.388031	0.710983	TRUE	0.07518	0.4244	0.9999	TRUE	-0.1816	0.05722	0.1466
ENSMUSG00000021824	Ap3m1	none	41.7755	-0.287848	0.487105	NA	46.5803	0.0882169	0.773768	0.959607	39.5712	0.24102	0.423356	0.962425	63.6412	-0.0693486	0.78291	0.902667	32.2673	-0.0445838	0.936217	0.985327	TRUE	0.04489	0.6754	0.9999	TRUE	-0.01069	0.9132	0.956
ENSMUSG00000031539	Ap3m2	none	955.207	0.0221105	0.86139	0.963676	947.865	-0.128365	0.323486	0.773813	215.194	0.0328201	0.834275	0.994132	254.013	-0.163503	0.353709	0.601924	72.2084	-0.74924	0.0607747	0.252571	TRUE	-0.0318	0.7407	0.9999	TRUE	-0.2744	0.003804	0.01663
ENSMUSG00000024480	Ap3s1	none	49.2238	0.317175	0.415419	NA	17.2269	0.275367	0.574484	0.905581	33.7674	-0.986915	0.00250261	0.193652	42.4853	-0.0792594	0.798887	0.911081	7.28382	0.014781	0.989471	0.996326	TRUE	-0.03919	0.7195	0.9999	TRUE	-0.1624	0.1633	0.3181
ENSMUSG00000063801	Ap3s2	none	310.937	0.0878358	0.646984	0.886224	332.989	-0.00749471	0.958372	0.992254	284.658	0.0783369	0.594196	0.987608	220.756	0.112507	0.506126	0.729844	55.2181	0.251297	0.575972	0.832646	TRUE	0.03861	0.6662	0.9999	TRUE	-0.1532	0.06945	0.1692
ENSMUSG00000032952	Ap4b1	none	13.7957	0.0461854	0.947396	NA	12.2391	0.141465	0.805031	0.967888	8.97318	0.0169814	0.977135	0.997323	7.59178	-0.0129002	0.983939	0.992506	NA	NA	NA	NA	TRUE	0.03975	0.7806	0.9999	TRUE	0.3131	0.01119	0.04043
ENSMUSG00000001998	Ap4e1	none	42.0782	-0.274677	0.507237	NA	59.5342	0.309925	0.264779	0.730525	40.9713	-0.119982	0.683175	0.991399	48.2985	0.0602015	0.825486	0.923289	36.4007	0.88567	0.101174	0.351435	TRUE	-0.06271	0.638	0.9999	TRUE	0.04212	0.732	0.8476
ENSMUSG00000019518	Ap4m1	none	52.264	-0.0668213	0.865458	NA	49.844	-0.169627	0.565541	0.902987	21.8704	0.233231	0.548304	0.980439	24.1705	-0.115757	0.7619	0.893598	15.5074	-0.633552	0.430324	0.746258	TRUE	0.03553	0.806	0.9999	TRUE	-0.08061	0.5198	0.6937
ENSMUSG00000020955	Ap4s1	none	241.273	-0.00181827	0.99252	0.999806	201.275	-0.0817318	0.651536	0.929812	207.868	0.0080829	0.960059	0.996968	239.109	-0.151418	0.378205	0.624276	49.9108	-0.287871	0.534826	0.815092	TRUE	-0.05148	0.7503	0.9999	TRUE	-0.2808	0.01928	0.06253
ENSMUSG00000049562	Ap5b1	none	21.2433	0.0571107	0.921688	NA	17.333	-0.00495995	0.991716	0.998561	9.20059	1.32875	0.04247	0.574592	5.27036	0.399826	0.603716	0.798393	21.5117	0.130805	0.848638	0.956602	NA	NA	NA	NA	NA	NA	NA	NA
ENSMUSG00000036291	Ap5m1	none	145.599	-0.367156	0.116105	0.468259	193.031	0.223609	0.181577	0.648096	139.296	0.167774	0.427218	0.962425	96.8414	0.105441	0.655948	0.831385	48.9716	0.255208	0.587409	0.839085	NA	NA	NA	NA	NA	NA	NA	NA
ENSMUSG00000068264	Ap5s1	none	32.1699	0.104271	0.825599	NA	24.3524	-0.0208182	0.960141	0.992385	19.4264	0.210429	0.647925	0.991361	31.7192	-0.43365	0.216579	0.454422	19.5239	0.409985	0.564858	0.829348	NA	NA	NA	NA	NA	NA	NA	NA
ENSMUSG00000039623	Ap5z1	none	45.8994	0.583781	0.164165	NA	29.9397	0.0655257	0.856415	0.976808	16.6859	0.332116	0.450399	0.967268	20.1939	-0.0259715	0.950235	0.980822	11.165	0.310587	0.736446	0.911306	NA	NA	NA	NA	NA	NA	NA	NA
ENSMUSG00000019979	Apaf1	none	103.871	0.111727	0.680029	0.90168	141.141	0.277137	0.160209	0.615921	26.1554	0.429149	0.234391	0.906835	51.5654	0.183007	0.536692	0.752889	49.6961	1.02398	0.032789	0.167803	TRUE	0.2431	0.1112	0.9024	TRUE	0.4162	0.005179	0.02153
ENSMUSG00000024897	Apba1	none	553.001	0.349264	0.0158249	0.170482	400.157	0.115289	0.403511	0.830874	455.175	0.313569	0.0272803	0.495957	217.092	0.193845	0.257545	0.504212	71.5877	-0.604483	0.136165	0.419585	TRUE	-0.03872	0.7194	0.9999	TRUE	-0.2918	0.004025	0.01737
ENSMUSG00000030519	Apba2	none	1875.9	-0.0512316	0.677629	0.900583	1644.23	-0.276627	0.0119142	0.169846	388.246	0.008024	0.957907	0.996155	458.459	-0.309434	0.0865148	0.257246	49.8234	-2.50053	1.73266e-06	5.32259e-05	TRUE	-0.1263	0.2363	0.9954	TRUE	-0.3357	0.002461	0.0114
ENSMUSG00000004931	Apba3	none	30.6742	0.878959	0.0954166	NA	16.4375	0.392571	0.421618	0.841294	12.3255	0.190645	0.73641	0.994132	52.6304	0.253889	0.374325	0.621073	14.0964	0.759903	0.399637	0.71931	TRUE	0.1027	0.6242	0.9999	TRUE	0.2293	0.1704	0.3279
ENSMUSG00000037032	Apbb1	none	3257.71	0.0396927	0.701752	0.911273	2216.52	-0.0225924	0.815798	0.96915	870.631	0.129489	0.339686	0.948922	512.554	-0.260543	0.134016	0.339343	66.3783	-1.5629	0.000545385	0.00755918	TRUE	-0.06964	0.6066	0.9999	TRUE	-0.1406	0.254	0.4352
ENSMUSG00000026786	Apbb1ip	none	14.9325	0.213956	0.756136	NA	10.9726	-0.194007	0.739302	NA	NA	NA	NA	NA	33.6609	1.91608	1.60442e-07	3.85601e-06	1038.01	0.405763	0.0939287	0.336906	TRUE	0.0698	0.7653	0.9999	TRUE	1.826	1.641e-24	6.873e-23
ENSMUSG00000029207	Apbb2	none	428.866	-0.18041	0.271053	0.657813	253.727	-0.10808	0.517521	0.881738	296.249	0.0541562	0.724453	0.993823	112.566	-0.344969	0.108309	0.297179	148.772	1.5998	1.88139e-06	5.703e-05	TRUE	-0.05727	0.5935	0.9999	TRUE	-0.04983	0.5924	0.7512
ENSMUSG00000005871	Apc	none	1462.87	-0.0264646	0.824908	0.954023	1324.42	0.00715776	0.955661	0.991677	1071.08	-0.081564	0.498471	0.977337	1396.86	-0.446258	0.000825017	0.00742152	306.17	-0.427213	0.108817	0.36721	TRUE	-0.01239	0.9054	0.9999	TRUE	-0.07231	0.5971	0.7544
ENSMUSG00000020135	Apc2	none	671.816	0.35158	0.0281894	0.235861	591.134	0.151119	0.229263	0.699017	399.675	0.2714	0.0899606	0.732415	272.297	-0.792054	1.07843e-05	0.000173962	33.8964	-3.0129	1.06553e-06	3.47945e-05	TRUE	-0.1334	0.2858	0.9999	TRUE	-0.2149	0.1162	0.2487
ENSMUSG00000071847	Apcdd1	none	20.3101	1.20047	0.0518288	NA	38.8172	-0.066438	0.841532	0.972303	17.3161	-0.229838	0.619049	0.98964	169.672	2.16496	4.25266e-26	5.27922e-24	NA	NA	NA	NA	TRUE	-0.3827	0.002448	0.1691	TRUE	0.7992	4.032e-12	7.513e-11
ENSMUSG00000032590	Apeh	none	33.0168	0.0191511	0.967365	NA	54.6078	-0.120438	0.672623	0.935111	72.0856	0.182793	0.483899	0.973802	41.1933	-0.138159	0.675013	0.842277	46.0744	0.0405963	0.934137	0.984753	TRUE	0.07442	0.6133	0.9999	TRUE	0.1305	0.2722	0.456
ENSMUSG00000035960	Apex1	none	272.353	-0.0653634	0.731198	0.922297	379.917	0.103865	0.445209	0.855589	99.3598	-0.0197209	0.922732	0.994877	123.167	0.030414	0.886833	0.954466	74.456	0.650275	0.114697	0.380378	TRUE	-0.1602	0.1572	0.9622	TRUE	0.01059	0.9247	0.9629
ENSMUSG00000025269	Apex2	none	23.6244	0.19312	0.721219	NA	20.0827	0.0837423	0.855052	0.976808	10.2773	-0.579358	0.315578	0.940059	15.4292	-0.824665	0.0911787	0.265484	16.1927	-0.139676	0.854977	0.958832	TRUE	0.3041	0.2343	0.9954	TRUE	-0.0765	0.7514	0.8595
ENSMUSG00000015750	Aph1a	none	NA	NA	NA	NA	NA	NA	NA	NA	NA	NA	NA	NA	7.92886	0.772267	0.262085	0.509353	NA	NA	NA	NA	TRUE	-0.1716	0.1451	0.9492	TRUE	0.3567	0.001501	0.007437
ENSMUSG00000032375	Aph1b	none	58.8178	-0.506553	0.181315	NA	65.3615	-0.316012	0.249881	0.717455	95.5866	-0.500681	0.0210126	0.452774	147.475	-0.249314	0.199584	0.432034	5.01577	-1.371	0.303682	0.638732	TRUE	0.3311	0.001023	0.1077	TRUE	-0.1602	0.1587	0.3115
ENSMUSG00000053040	Aph1c	none	16.6531	0.181745	0.784288	NA	22.985	-0.0720233	0.869446	0.9775	20.2345	-0.385184	0.362584	0.955991	39.095	-0.703743	0.0214266	0.0978834	9.59348	1.34533	0.196223	0.515655	TRUE	0.4428	0.01485	0.437	TRUE	-0.2371	0.1346	0.2764
ENSMUSG00000027193	Api5	none	429.896	-0.472702	0.0047193	0.0890541	559.86	0.00949312	0.948019	0.991015	311.921	0.0584193	0.693623	0.992723	201.741	-0.134244	0.453216	0.689556	137.724	0.111031	0.730831	0.910015	TRUE	0.06786	0.4597	0.9999	TRUE	-0.1196	0.1994	0.3676
ENSMUSG00000010911	Apip	none	64.4556	-0.345968	0.328233	NA	59.986	0.112807	0.680119	0.935363	100.775	-0.220787	0.281218	0.929235	99.96	-0.0590112	0.779194	0.901733	33.9978	-0.392567	0.467736	0.773136	TRUE	0.2122	0.2599	0.9999	TRUE	0.1068	0.5378	0.7077
ENSMUSG00000030051	Aplf	none	41.4651	-0.340309	0.407588	NA	27.7408	0.349143	0.359845	0.80425	21.0156	-0.223546	0.576164	0.983338	33.6614	0.0353633	0.912785	0.966851	7.75113	1.39505	0.230614	0.556441	TRUE	-0.08779	0.6832	0.9999	TRUE	-0.01384	0.9431	0.9726
ENSMUSG00000037010	Apln	none	NA	NA	NA	NA	NA	NA	NA	NA	NA	NA	NA	NA	214.709	-2.49684	2.34432e-39	6.19768e-37	NA	NA	NA	NA	TRUE	0.3441	0.01571	0.4515	TRUE	-1.394	1.417e-24	5.985e-23
ENSMUSG00000006651	Aplp1	none	8127.84	0.0493702	0.662838	0.895445	5785.82	-0.0882178	0.394853	0.827037	1865.44	-0.074289	0.558874	0.980439	8709.22	-0.260546	0.0751112	0.233716	267.944	-0.8948	0.00415539	0.0378945	TRUE	-0.06668	0.6509	0.9999	TRUE	-0.001326	0.9929	0.9969
ENSMUSG00000031996	Aplp2	none	6588.51	-0.12635	0.239467	0.628332	4464.76	-0.379166	0.00044727	0.0200218	7846.02	-0.196393	0.0904783	0.732746	9922.58	-0.1413	0.340074	0.589329	2161.18	1.94188	1.51607e-13	1.53136e-11	TRUE	0.03065	0.7961	0.9999	TRUE	-0.2157	0.07348	0.1768
ENSMUSG00000033096	Apmap	none	437.229	0.0337348	0.834683	0.955364	433.071	-0.103123	0.461705	0.861572	493.976	-0.170508	0.202423	0.884347	639.573	0.0428878	0.772194	0.898365	139.141	0.697282	0.0297128	0.156079	NA	NA	NA	NA	NA	NA	NA	NA
ENSMUSG00000009585	Apobec3	none	5.09453	3.09715	0.0349649	NA	NA	NA	NA	NA	NA	NA	NA	NA	46.8119	0.646381	0.0293754	0.122693	206.397	1.33102	1.51676e-05	0.000354475	TRUE	-0.02201	0.9338	0.9999	TRUE	2.205	1.602e-25	7.079e-24
ENSMUSG00000022548	Apod	none	420.468	1.47558	9.68888e-19	1.99188e-15	50.651	2.19342	1.17756e-09	4.3988e-07	277.32	1.16432	7.19254e-10	1.15656e-06	2264.37	2.92661	2.34844e-44	8.3816e-42	377.104	1.95979	1.70532e-11	1.27036e-09	TRUE	0.1688	0.1478	0.9492	TRUE	2.808	6.476e-74	2.069e-71
ENSMUSG00000002985	Apoe	none	2137.59	1.11467	2.72136e-14	3.1536e-11	321.715	0.84424	0.396707	0.827702	909.282	1.09464	0.00103325	0.123493	159117	0.183881	0.249363	0.494707	107640	3.83533	9.83119e-80	1.67397e-76	TRUE	0.02658	0.8468	0.9999	TRUE	1.676	4.13e-17	1.101e-15
ENSMUSG00000000049	Apoh	none	NA	NA	NA	NA	3.37066	-0.235174	0.843857	NA	NA	NA	NA	NA	10.0657	1.50448	0.01138	0.0613523	NA	NA	NA	NA	TRUE	-0.8687	0.1382	0.9424	FALSE	-0.06754	0.9134	NA
ENSMUSG00000056656	Apol8	none	24.4912	0.624218	0.275347	NA	27.9447	-0.462944	0.235396	0.705601	47.8943	0.0567874	0.841565	0.994132	4.02873	0.421042	0.629983	0.816194	NA	NA	NA	NA	TRUE	-0.2674	0.2722	0.9999	TRUE	-0.2685	0.1969	0.3645
ENSMUSG00000090698	Apold1	none	NA	NA	NA	NA	NA	NA	NA	NA	NA	NA	NA	NA	NA	NA	NA	NA	NA	NA	NA	NA	TRUE	-0.1039	0.7452	0.9999	TRUE	-1.218	0.0001107	0.0007549
ENSMUSG00000025525	Apool	none	36.9631	-0.0248431	0.955144	NA	51.3975	0.031582	0.911636	0.984076	64.0905	-0.00262044	0.991648	0.997932	77.0783	0.147945	0.531851	0.749403	40.7205	0.859474	0.0984145	0.345509	TRUE	0.1263	0.6924	0.9999	TRUE	0.2268	0.3729	0.5627
ENSMUSG00000037787	Apopt1	none	129.644	-0.235555	0.33715	0.706725	102.343	0.0748739	0.718892	0.946536	91.7238	0.249891	0.271073	0.924628	156.973	0.381966	0.034074	0.137257	32.7188	0.748545	0.209423	0.533243	NA	NA	NA	NA	NA	NA	NA	NA
ENSMUSG00000022892	App	none	30781.1	-0.0367301	0.710554	0.916147	22938.1	-0.261696	0.00241684	0.0603264	19550.4	-0.193831	0.0804319	0.710141	15785.2	0.0976909	0.579497	0.782895	2782.29	-0.171175	0.437716	0.751777	TRUE	-0.01477	0.9217	0.9999	TRUE	-0.2554	0.1013	0.2246
ENSMUSG00000018481	Appbp2	none	921.268	-0.163916	0.199618	0.583168	974.865	0.00954215	0.940603	0.989562	986.66	-0.0186668	0.878207	0.994132	761.15	-0.0998117	0.495179	0.723503	199.62	-0.190818	0.496173	0.791155	TRUE	0.07705	0.4829	0.9999	TRUE	-0.1706	0.142	0.2873
ENSMUSG00000040760	Appl1	none	1113.35	-0.122193	0.318234	0.69472	1195.78	0.182042	0.147311	0.593462	682.995	0.145219	0.249617	0.915168	560.822	-0.125688	0.392333	0.637519	144.117	-0.119058	0.707273	0.901893	TRUE	0.1536	0.1102	0.9015	TRUE	-0.2479	0.006118	0.02468
ENSMUSG00000020263	Appl2	none	67.8721	0.456109	0.192386	NA	31.1505	-0.166526	0.640397	0.927249	151.573	-0.264799	0.140031	0.817022	759.145	-0.40772	0.00560961	0.0358463	83.2604	-0.166289	0.657323	0.877651	TRUE	0.0222	0.8131	0.9999	TRUE	-0.07361	0.4028	0.5915
ENSMUSG00000006589	Aprt	none	132.327	0.190981	0.435887	0.772749	155.855	0.752975	0.000518079	0.02236	57.1232	0.0783875	0.756349	0.994132	115.849	0.740417	0.000644943	0.00600993	86.1804	1.11671	0.00462446	0.0410722	TRUE	-0.1755	0.2869	0.9999	TRUE	0.2875	0.03281	0.09551
ENSMUSG00000028411	Aptx	none	134.417	-0.306324	0.219039	0.606812	104.96	0.193152	0.356033	0.802495	71.8681	-0.0494984	0.832606	0.994132	106.111	-0.106956	0.608172	0.800873	38.0699	0.193344	0.711081	0.903743	TRUE	-0.05444	0.6133	0.9999	TRUE	-0.2479	0.02098	0.06701
ENSMUSG00000042797	Aqp11	none	24.8014	-0.1256	0.812602	NA	26.2255	-1.06137	0.00854171	0.140627	16.406	-0.0126036	0.977909	0.997323	47.4872	-0.796954	0.00860752	0.0498907	NA	NA	NA	NA	TRUE	-0.06788	0.698	0.9999	TRUE	-0.5361	0.0004802	0.002742
ENSMUSG00000024411	Aqp4	none	80.005	1.07108	0.00100828	NA	24.9719	0.994157	0.0577871	0.39917	87.0514	1.20248	1.75304e-07	0.00022551	14918.8	0.764756	1.78441e-06	3.48009e-05	84.9227	-0.117527	0.794904	0.934457	TRUE	0.1638	0.1209	0.926	TRUE	1.987	2.096e-40	1.737e-38
ENSMUSG00000040383	Aqr	none	464.213	-0.272879	0.0921603	0.417163	460.547	-0.0531622	0.678687	0.935363	233.35	-0.0820335	0.610124	0.989253	171.371	-0.36738	0.0491467	0.175844	106.318	-0.319091	0.392431	0.713558	TRUE	0.179	0.082	0.8461	TRUE	-0.02394	0.831	0.9079
ENSMUSG00000046532	Ar	none	240.329	-0.0617022	0.755982	0.932637	270.457	-0.146566	0.343581	0.791243	71.6036	0.337758	0.146703	0.826623	46.7243	-0.535823	0.0751083	0.233716	6.17515	-2.45238	0.0584869	0.245806	TRUE	0.07902	0.7292	0.9999	TRUE	-0.4212	0.1122	0.2418
ENSMUSG00000001127	Araf	none	665.921	0.314336	0.0255653	0.222751	559.514	0.138631	0.244071	0.712244	616.522	0.193571	0.14448	0.825377	513.748	0.22943	0.106824	0.294689	70.6669	-0.0861874	0.839664	0.953502	TRUE	-0.05143	0.5727	0.9999	TRUE	-0.1424	0.1156	0.2477
ENSMUSG00000032812	Arap1	none	11.2682	1.63916	0.0494707	NA	4.63204	-0.855845	0.344681	NA	127.262	-0.326716	0.0987795	0.753677	108.147	-0.272489	0.235518	0.477525	182.376	0.636983	0.030755	0.160214	TRUE	0.1294	0.3919	0.9999	TRUE	1.153	3.171e-19	9.517e-18
ENSMUSG00000037999	Arap2	none	597.45	-0.273053	0.0671301	0.362669	497.291	0.103939	0.444942	0.855379	247.07	-0.37964	0.021511	0.456096	417.658	0.0110793	0.945875	0.980064	50.7269	-0.291403	0.528142	0.811141	TRUE	-0.009338	0.9358	0.9999	TRUE	-0.02584	0.8226	0.9033
ENSMUSG00000024451	Arap3	none	6.4454	-0.32222	0.757067	NA	4.97867	-0.64541	0.475671	NA	NA	NA	NA	NA	NA	NA	NA	NA	63.2546	-1.1561	0.00553907	0.0469029	TRUE	0.01336	0.9303	0.9999	TRUE	-0.009192	0.9479	0.9748
ENSMUSG00000022602	Arc	none	769.233	-0.244933	0.152843	0.516971	1015.21	-0.121002	0.805104	0.967888	50.2468	-0.549409	0.0579706	0.644541	91.1598	-1.82829	9.54914e-10	3.26133e-08	23.0574	-3.3734	1.27921e-05	0.000305548	TRUE	-0.01433	0.951	0.9999	TRUE	-1.207	3.322e-10	5.063e-09
ENSMUSG00000032096	Arcn1	none	684.789	-0.095014	0.508039	0.814103	836.889	0.0629257	0.566581	0.902987	464.472	0.019096	0.887081	0.994132	378.908	-0.0854025	0.602715	0.79758	240.816	0.610731	0.0296619	0.155882	TRUE	0.03109	0.7268	0.9999	TRUE	-0.03609	0.6768	0.8113
ENSMUSG00000042350	Arel1	none	514.556	-0.0557527	0.708922	0.915277	603.49	0.11052	0.381942	0.818818	222.648	-0.0274764	0.860793	0.994132	255.611	0.144409	0.365341	0.612017	78.9232	-0.0925109	0.810793	0.940907	NA	NA	NA	NA	NA	NA	NA	NA
ENSMUSG00000048076	Arf1	none	1507.67	0.13091	0.274585	0.663143	1442.29	0.0671869	0.535809	0.891674	561.977	0.143363	0.332884	0.948863	624.553	0.348999	0.011172	0.0604823	357.024	0.0672897	0.790115	0.932137	TRUE	-0.09758	0.3695	0.9999	TRUE	-0.1505	0.1736	0.3325
ENSMUSG00000062421	Arf2	none	264.143	0.22849	0.227736	0.617328	284.595	-0.230282	0.123869	0.55888	243.832	-0.112817	0.511376	0.977729	208.657	0.400837	0.0240833	0.106576	121.842	0.239577	0.475607	0.776772	TRUE	-0.05228	0.6087	0.9999	TRUE	-0.02156	0.8297	0.907
ENSMUSG00000051853	Arf3	none	7752.08	-0.0528166	0.60609	0.863613	11126.7	-0.0106799	0.900476	0.982131	1439.18	0.0855521	0.471716	0.972154	2565.62	0.17442	0.248302	0.49308	528.488	0.199085	0.393639	0.714556	TRUE	-0.1442	0.3684	0.9999	TRUE	-0.4176	0.007922	0.03042
ENSMUSG00000021877	Arf4	none	810.628	-0.121414	0.401226	0.752294	1256.12	0.155408	0.120866	0.552715	484.725	0.0777957	0.570682	0.983133	920.867	0.202938	0.146935	0.359863	466.686	0.723071	0.00273411	0.0273618	TRUE	0.08838	0.3419	0.9999	TRUE	0.07925	0.3702	0.5599
ENSMUSG00000020440	Arf5	none	1214.01	0.0139271	0.917088	0.980018	1389.93	-0.0609418	0.623001	0.921487	480.605	0.0497595	0.706857	0.992723	584.392	0.170435	0.225836	0.465833	233.846	0.458265	0.105552	0.360996	TRUE	-0.2806	0.01229	0.4051	TRUE	0.02645	0.8341	0.9099
ENSMUSG00000044147	Arf6	none	261.767	0.106908	0.566615	0.846277	169.311	-0.13086	0.444799	0.855255	354.294	-0.224629	0.117822	0.787763	300.793	-0.0772004	0.627626	0.814841	310.547	-0.149776	0.566015	0.829396	TRUE	-0.04235	0.7052	0.9999	TRUE	0.103	0.327	0.517
ENSMUSG00000027575	Arfgap1	none	694.004	0.187917	0.164233	0.534596	649.756	0.234895	0.0606799	0.409816	192.524	0.13915	0.400828	0.957669	128.095	-0.353142	0.107602	0.295908	66.8482	-0.34414	0.409951	0.727781	TRUE	-0.2587	0.006103	0.2803	TRUE	-0.01527	0.8626	0.9283
ENSMUSG00000027255	Arfgap2	none	274.352	0.173569	0.35732	0.722505	218.003	0.16553	0.310434	0.764302	173.481	0.239192	0.180048	0.862487	125.064	-0.289181	0.143839	0.355021	80.5249	-0.0430643	0.912012	0.979325	TRUE	-0.08136	0.3766	0.9999	TRUE	-0.02788	0.7548	0.8615
ENSMUSG00000054277	Arfgap3	none	147.367	0.270287	0.256097	0.645627	165.437	0.883132	5.38332e-06	0.000633886	89.8622	0.000343203	0.998698	0.999397	57.4438	0.0374105	0.88575	0.953905	55.6825	0.560989	0.215704	0.539489	TRUE	-0.00243	0.986	0.9999	TRUE	0.2694	0.03043	0.08995
ENSMUSG00000067851	Arfgef1	none	1478.12	-0.435376	0.000175816	0.0100488	1619.68	-0.0250094	0.808327	0.968072	1054.28	0.0983777	0.425754	0.962425	521.218	-0.252364	0.088934	0.261078	213.429	0.28949	0.31702	0.650131	TRUE	0.06906	0.4445	0.9999	TRUE	-0.2096	0.02572	0.07902
ENSMUSG00000074582	Arfgef2	none	719.882	-0.0272451	0.845768	0.960347	585.906	-0.0856304	0.454054	0.857227	563.042	0.0599493	0.670628	0.991361	363.311	-0.0301195	0.853086	0.9376	158.593	0.358016	0.237171	0.565585	TRUE	0.07838	0.4303	0.9999	TRUE	-0.01011	0.9106	0.9545
ENSMUSG00000019852	Arfgef3	none	1539.31	0.359085	0.00489854	0.0913125	1145.26	0.0100497	0.928299	0.987647	543.245	0.216755	0.148642	0.830808	289.194	-0.376655	0.0535728	0.18558	64.8579	-2.34474	5.07588e-07	1.76899e-05	NA	NA	NA	NA	NA	NA	NA	NA
ENSMUSG00000030881	Arfip2	none	568.573	0.135716	0.365385	0.728302	517.794	-0.226119	0.0753353	0.45823	284.742	-0.0287143	0.850844	0.994132	219.6	0.270589	0.143226	0.35406	32.9543	0.0479367	0.932022	0.984618	TRUE	-0.01061	0.9087	0.9999	TRUE	-0.06885	0.4174	0.6048
ENSMUSG00000038671	Arfrp1	none	125.856	-0.0205914	0.937386	0.985431	150.277	-0.134656	0.496148	0.875807	67.5593	-0.109903	0.641762	0.991361	103.726	0.0507336	0.816422	0.92053	56.2077	-0.00620294	0.989216	0.996326	TRUE	0.04696	0.6613	0.9999	TRUE	-0.2271	0.06264	0.1569
ENSMUSG00000021125	Arg2	none	18.6855	-0.115353	0.853446	NA	19.0857	0.275145	0.57326	0.905046	NA	NA	NA	NA	NA	NA	NA	NA	NA	NA	NA	NA	TRUE	0.1166	0.7268	0.9999	TRUE	-0.38	0.3084	0.4975
ENSMUSG00000040459	Arglu1	none	110.537	-0.456751	0.11354	0.463015	147.597	-0.171492	0.406971	0.832043	129.394	-0.45678	0.0130755	0.387566	121.804	-0.61965	0.00329617	0.0232491	98.6087	-0.624785	0.0873356	0.320392	TRUE	-0.09857	0.3048	0.9999	TRUE	-0.1029	0.2842	0.4693
ENSMUSG00000027247	Arhgap1	none	524.057	0.221741	0.159223	0.527178	350.876	0.215843	0.137701	0.579284	133.735	0.484741	0.0164513	0.427868	201.183	0.349016	0.0375884	0.146992	104.87	-0.210088	0.54531	0.820704	TRUE	0.02996	0.7609	0.9999	TRUE	0.03842	0.6623	0.8008
ENSMUSG00000037148	Arhgap10	none	136.508	0.0603302	0.801318	0.946876	40.7231	0.256904	0.418918	0.839462	26.2681	0.365933	0.324959	0.943961	19.0821	-0.578477	0.172111	0.396552	10.8061	-1.06893	0.251909	0.582784	TRUE	-0.2585	0.1914	0.9878	TRUE	-0.4519	0.03397	0.09822
ENSMUSG00000041219	Arhgap11a	none	9.76105	0.077913	0.924943	NA	4.81876	0.460926	0.62533	NA	20.1192	0.410153	0.311856	0.939405	8.12542	1.37932	0.0347408	0.139354	87.4415	-0.597478	0.104104	0.357455	TRUE	-0.159	0.5407	0.9999	TRUE	0.9985	2.535e-05	0.000197
ENSMUSG00000041225	Arhgap12	none	135.089	-0.377117	0.117202	0.470055	869.901	-0.416295	0.0179344	0.214931	268.29	-0.0517839	0.7368	0.994132	261.094	-0.0422956	0.787622	0.905249	138.565	-0.122126	0.711484	0.903743	TRUE	-0.03404	0.7671	0.9999	TRUE	-0.316	0.0159	0.05352
ENSMUSG00000049744	Arhgap15	none	102.141	-0.244561	0.367851	0.729011	89.3363	0.0383844	0.870066	0.9775	29.0706	-0.108479	0.751767	0.994132	25.2342	0.0352524	0.932047	0.97452	34.364	1.42344	0.0125798	0.0849031	TRUE	0.006666	0.9742	0.9999	TRUE	-0.1078	0.4524	0.6367
ENSMUSG00000030766	Arhgap17	none	26.7933	0.215874	0.680928	NA	24.7626	0.43387	0.277285	0.743523	18.5544	-0.274618	0.518304	0.977956	51.4856	-0.128933	0.644376	0.824395	266.475	0.0956022	0.714736	0.90511	TRUE	-0.02573	0.8449	0.9999	TRUE	0.4432	0.0001147	0.0007772
ENSMUSG00000039031	Arhgap18	none	9.06096	0.339281	0.695323	NA	NA	NA	NA	NA	8.93972	-0.18124	0.769032	0.994132	146.895	1.00274	2.84591e-07	6.52137e-06	76.8671	-0.0358126	0.934075	0.984753	TRUE	0.2881	0.2363	0.9954	TRUE	1.183	3.619e-14	7.772e-13
ENSMUSG00000025154	Arhgap19	none	22.7203	-0.124142	0.821064	NA	18.4729	0.450483	0.335197	0.783428	8.96763	-0.0907558	0.878379	0.994132	15.641	0.463336	0.3031	0.554438	64.6613	1.46052	0.00235688	0.0245556	TRUE	0.1078	0.6534	0.9999	TRUE	1.11	2.459e-09	3.412e-08
ENSMUSG00000053199	Arhgap20	none	655.794	-0.317939	0.0213382	0.199147	499.539	0.121955	0.313802	0.767362	498.596	-0.144178	0.304924	0.939405	165.612	-0.145587	0.487426	0.717815	22.8559	-1.97481	0.0034944	0.0332665	TRUE	-0.2209	0.06236	0.7878	TRUE	-0.4781	7.475e-05	0.0005292
ENSMUSG00000036591	Arhgap21	none	334.928	-0.0219992	0.897352	0.97525	509.333	0.334137	0.005855	0.108795	263.34	-0.299548	0.0715156	0.686472	346.571	-0.25383	0.0987787	0.280017	56.4355	-0.808338	0.109766	0.368847	TRUE	-0.1227	0.2471	0.9999	TRUE	-0.01468	0.8948	0.9461
ENSMUSG00000063506	Arhgap22	none	NA	NA	NA	NA	NA	NA	NA	NA	NA	NA	NA	NA	4.5034	2.89295	0.00696592	0.0420844	50.527	-0.165435	0.720718	0.907029	TRUE	-0.2754	0.2813	0.9999	TRUE	0.7733	0.0002646	0.001621
ENSMUSG00000049807	Arhgap23	none	127.302	0.511602	0.0503942	0.321165	149.325	0.50341	0.0122165	0.172319	62.4215	0.0471982	0.847754	0.994132	83.8479	0.170002	0.455795	0.692185	12.9136	-1.78754	0.0470209	0.211408	TRUE	0.02772	0.7618	0.9999	TRUE	-0.04815	0.6327	0.7799
ENSMUSG00000057315	Arhgap24	none	12.3282	0.0335249	0.965203	NA	7.03481	0.726622	0.343263	NA	49.1576	0.17162	0.546792	0.980148	48.1146	-0.212637	0.440199	0.679685	66.7188	1.70349	0.000112208	0.00199612	TRUE	-0.07229	0.7765	0.9999	TRUE	0.1602	0.4385	0.6241
ENSMUSG00000030047	Arhgap25	none	98.5521	0.676777	0.0159212	0.170834	8.05877	0.119926	0.859966	NA	NA	NA	NA	NA	8.54445	0.150625	0.807734	0.915611	239.346	0.907364	0.00395055	0.0365579	TRUE	0.314	0.2895	0.9999	TRUE	1.385	6.925e-08	8.169e-07
ENSMUSG00000036452	Arhgap26	none	1169.89	0.0924775	0.460284	0.788037	816.528	-0.253331	0.0908113	0.490897	1245.56	-0.170528	0.181166	0.862779	235.794	-0.501326	0.00200072	0.0154349	60.6037	-1.45437	0.00187414	0.0202703	TRUE	0.1446	0.258	0.9999	TRUE	-0.3667	0.007318	0.02857
ENSMUSG00000034255	Arhgap27	none	23.6348	0.58917	0.280965	NA	19.3362	-0.411267	0.362394	0.806321	33.2763	0.153724	0.634868	0.991361	7.1897	0.0390364	0.952348	0.981641	95.0967	-0.851775	0.0166485	0.103082	TRUE	-0.4491	0.002671	0.1741	TRUE	0.4697	0.0002396	0.001491
ENSMUSG00000085360	Arhgap27os2	none	NA	NA	NA	NA	4.86533	0.18881	0.836703	NA	NA	NA	NA	NA	NA	NA	NA	NA	NA	NA	NA	NA	NA	NA	NA	NA	NA	NA	NA	NA
ENSMUSG00000039831	Arhgap29	none	51.4886	0.167342	0.658196	NA	38.2352	0.340205	0.327283	0.775472	9.47215	0.562727	0.346756	0.950864	45.6041	1.07183	0.000486658	0.00471659	27.7739	-0.548935	0.358221	0.689208	TRUE	0.08344	0.558	0.9999	TRUE	-0.3889	0.004173	0.01789
ENSMUSG00000022799	Arhgap31	none	90.9699	-0.408783	0.165159	NA	30.2861	0.142565	0.705267	0.942708	450.189	-0.174099	0.207566	0.887528	358.859	0.699583	0.000293997	0.00308158	157.133	0.072907	0.816147	0.942389	TRUE	0.2014	0.07157	0.8179	TRUE	0.6817	2.799e-13	5.692e-12
ENSMUSG00000041444	Arhgap32	none	3999.94	-0.0551961	0.599507	0.860345	1133.5	-0.0503354	0.693542	0.941077	729.653	-0.155523	0.213769	0.890745	1310.64	-0.309123	0.0256631	0.111834	116.223	-1.54986	1.56163e-05	0.000362122	TRUE	-0.1656	0.1817	0.9878	TRUE	-0.3348	0.04852	0.1297
ENSMUSG00000036882	Arhgap33	none	316.585	0.319377	0.0834047	0.397222	163.032	0.0545714	0.79044	0.963389	9.84149	0.523082	0.369712	0.956332	83.0944	-0.64362	0.00864558	0.0500707	8.53083	-4.65168	0.000981869	0.0122543	TRUE	-0.2129	0.1638	0.9731	TRUE	-0.5285	0.001546	0.007623
ENSMUSG00000058230	Arhgap35	none	838.095	0.311681	0.0226141	0.207991	736.742	0.231264	0.0612427	0.412051	421.036	0.155647	0.252974	0.916617	412.062	0.0920166	0.5481	0.760489	53.3687	-1.54436	0.00175612	0.0192737	NA	NA	NA	NA	NA	NA	NA	NA
ENSMUSG00000036198	Arhgap36	none	22.546	-0.0940971	0.864669	NA	NA	NA	NA	NA	9.33047	1.55887	0.0116077	0.373305	61.5471	0.631363	0.0662731	0.213956	3.75594	-1.8912	0.221476	0.545627	TRUE	1.263	0.005383	0.2616	TRUE	-0.2558	0.6047	0.7604
ENSMUSG00000033697	Arhgap39	none	218.451	0.383443	0.0744369	0.380559	449.965	0.442525	0.00360226	0.0787906	41.7847	0.200057	0.486763	0.974617	46.9814	-0.272541	0.344162	0.592816	65.3435	-0.491268	0.239795	0.569082	TRUE	-0.0181	0.8784	0.9999	TRUE	0.08537	0.435	0.6209
ENSMUSG00000050730	Arhgap42	none	89.8118	0.353865	0.244097	NA	32.511	0.331062	0.347749	0.795525	33.6435	0.391761	0.215606	0.892104	121.884	0.159643	0.451848	0.688576	NA	NA	NA	NA	TRUE	-0.07266	0.6925	0.9999	TRUE	0.1617	0.2741	0.458
ENSMUSG00000033389	Arhgap44	none	607.42	0.319043	0.0372696	0.27163	493.358	0.206198	0.104944	0.521258	342.989	0.0430105	0.762435	0.994132	155.566	0.144861	0.483452	0.714468	22.1247	-2.18064	0.00336413	0.0324147	TRUE	-0.1284	0.1867	0.9878	TRUE	-0.2877	0.001884	0.009018
ENSMUSG00000035697	Arhgap45	none	7.17505	0.869171	0.379503	NA	NA	NA	NA	NA	NA	NA	NA	NA	NA	NA	NA	NA	299.482	-0.514643	0.071443	0.281404	NA	NA	NA	NA	NA	NA	NA	NA
ENSMUSG00000035133	Arhgap5	none	843.786	-0.47419	0.000736471	0.0266142	946.818	0.169362	0.155969	0.609054	2221.65	-0.190033	0.200446	0.882391	2797.47	-0.523646	0.00100802	0.00882308	1139.16	-0.250282	0.285186	0.618057	TRUE	0.04571	0.6495	0.9999	TRUE	-0.05608	0.513	0.6891
ENSMUSG00000031355	Arhgap6	none	44.5274	-0.383654	0.340954	NA	10.7256	-0.263294	0.673735	NA	12.4419	0.316784	0.528781	0.979024	34.2727	-0.234573	0.494825	0.723354	NA	NA	NA	NA	TRUE	0.03281	0.9237	0.9999	TRUE	0.04157	0.8971	0.9475
ENSMUSG00000025132	Arhgdia	none	1416.98	-0.025555	0.839181	0.957637	1473.6	0.0104557	0.934178	0.988451	455.063	-0.121689	0.381156	0.957654	1484.22	0.385167	0.00387718	0.02637	1775.67	0.569378	0.0186037	0.111763	TRUE	0.02602	0.8236	0.9999	TRUE	0.04008	0.7223	0.8417
ENSMUSG00000030220	Arhgdib	none	31.111	-0.393856	0.432184	NA	31.9507	0.74901	0.0645185	0.422824	9.36661	0.48274	0.465639	0.970586	17.5426	0.126459	0.769221	0.89655	1373.13	0.0953516	0.660714	0.879638	TRUE	0.07989	0.7036	0.9999	TRUE	1.398	8.292e-18	2.312e-16
ENSMUSG00000073433	Arhgdig	none	231.864	0.302266	0.13537	0.494568	135.974	-0.0820578	0.67951	0.935363	50.717	0.0474234	0.864609	0.994132	75.6597	0.12152	0.626593	0.814088	NA	NA	NA	NA	TRUE	-0.00369	0.9808	0.9999	TRUE	-0.1686	0.2393	0.4178
ENSMUSG00000040940	Arhgef1	none	66.9758	-0.24528	0.455251	NA	51.0023	-0.236875	0.420882	0.840693	22.7606	-0.293792	0.446164	0.966257	32.6254	-0.307883	0.348858	0.597769	103.106	-0.505367	0.155046	0.453719	TRUE	-0.1557	0.1528	0.9585	TRUE	0.3414	0.001927	0.009208
ENSMUSG00000071176	Arhgef10	none	32.3451	0.765448	0.107356	NA	18.6604	0.251662	0.57986	0.907404	19.1727	-0.209967	0.605978	0.989253	263.339	0.273179	0.14196	0.351919	16.1478	-1.1746	0.136856	0.421279	TRUE	0.1242	0.295	0.9999	TRUE	0.4225	2.449e-05	0.0001909
ENSMUSG00000040964	Arhgef10l	none	84.8362	0.371191	0.218891	NA	39.9999	0.0170136	0.957783	0.992068	59.4463	0.199643	0.428748	0.962425	162.847	0.282601	0.126803	0.328299	41.0306	-1.26021	0.0121835	0.0828853	TRUE	-0.2408	0.1104	0.9015	TRUE	0.3463	0.00608	0.02454
ENSMUSG00000041977	Arhgef11	none	392.747	-0.140621	0.385651	0.741176	427.664	-0.0420428	0.750846	0.953535	332.588	0.18141	0.248839	0.914752	148.444	-0.313298	0.0918242	0.266656	62.5335	-0.094385	0.835383	0.951771	TRUE	0.003577	0.9702	0.9999	TRUE	-0.07405	0.406	0.5946
ENSMUSG00000059495	Arhgef12	none	690.963	0.258726	0.0595904	0.348178	725.519	0.252991	0.0498629	0.36947	473.734	0.110327	0.39227	0.957654	1714.65	0.359197	0.025043	0.109647	129.493	-0.43365	0.187536	0.503731	TRUE	0.09403	0.3738	0.9999	TRUE	0.05545	0.63	0.7781
ENSMUSG00000052921	Arhgef15	none	34.4952	-0.203445	0.660577	NA	9.54131	-0.528765	0.425229	NA	20.4692	0.331802	0.414126	0.958839	6.23775	0.032273	0.964075	0.985756	NA	NA	NA	NA	TRUE	-0.1546	0.4769	0.9999	TRUE	-0.1525	0.3668	0.5565
ENSMUSG00000032875	Arhgef17	none	917.866	0.158392	0.249392	0.638683	676.724	0.0892065	0.486105	0.871423	361.48	0.176366	0.24583	0.913421	245.134	0.125667	0.488291	0.718266	40.5129	-1.64627	0.00184944	0.0200395	TRUE	-0.01884	0.8623	0.9999	TRUE	-0.1446	0.243	0.4221
ENSMUSG00000004568	Arhgef18	none	290.595	0.147917	0.412992	0.759465	306.789	-0.131342	0.344712	0.791971	160.038	0.209956	0.287189	0.932928	148.516	-0.575625	0.00198277	0.015336	51.6149	-0.572968	0.216559	0.540177	TRUE	0.1462	0.118	0.9172	TRUE	-0.08796	0.336	0.5258
ENSMUSG00000028919	Arhgef19	none	6.83501	-0.102864	0.917999	NA	NA	NA	NA	NA	7.12501	0.456342	0.502748	0.977337	182.336	0.0871147	0.678921	0.844502	NA	NA	NA	NA	TRUE	0.2827	0.13	0.9354	TRUE	0.9764	1.527e-07	1.71e-06
ENSMUSG00000028059	Arhgef2	none	1031.31	-0.0335585	0.799512	0.946876	992.504	0.0735743	0.498492	0.876663	169.917	0.122184	0.497629	0.977337	118.675	-0.270274	0.27462	0.523093	226.493	0.162841	0.567868	0.830093	TRUE	-0.128	0.1553	0.961	TRUE	-0.2223	0.02683	0.08178
ENSMUSG00000019467	Arhgef25	none	158.567	0.282347	0.212742	0.598211	273.389	0.13207	0.449594	0.856321	33.6618	0.403326	0.239571	0.908037	63.7396	0.781989	0.00477076	0.0313426	13.0304	-3.06977	0.00124354	0.0149112	TRUE	-0.1213	0.2601	0.9999	TRUE	-0.3325	0.005007	0.02094
ENSMUSG00000036885	Arhgef26	none	32.5213	0.655551	0.176974	NA	207.297	0.0268969	0.873456	0.978534	58.8899	0.116171	0.657912	0.991361	583.52	-0.276287	0.0745427	0.232606	7.57316	-1.15779	0.303447	0.638715	TRUE	0.08239	0.4394	0.9999	TRUE	0.7158	1.918e-12	3.645e-11
ENSMUSG00000021662	Arhgef28	none	226.749	0.192548	0.325052	0.698422	570.531	0.121043	0.287493	0.749053	9.07654	-0.488556	0.458361	0.968979	105.449	-0.0120372	0.956091	0.982944	15.2412	-1.81705	0.0275305	0.147809	NA	NA	NA	NA	NA	NA	NA	NA
ENSMUSG00000021895	Arhgef3	none	402.747	0.0979697	0.553404	0.838305	523.531	0.0420643	0.748651	0.953483	189.6	0.00258427	0.987972	0.997356	53.7612	-0.16312	0.559138	0.767672	51.188	-0.870921	0.0553171	0.236402	TRUE	0.07019	0.445	0.9999	TRUE	-0.2717	0.007954	0.03053
ENSMUSG00000054901	Arhgef33	none	4.13152	0.780606	0.559513	NA	NA	NA	NA	NA	943.201	-0.302222	0.0169487	0.433297	19.3526	0.574312	0.167521	0.390326	11.0528	-2.0615	0.0389374	0.187286	TRUE	-0.6991	0.0874	0.8544	TRUE	1.35	2.217e-05	0.0001752
ENSMUSG00000045094	Arhgef37	none	NA	NA	NA	NA	NA	NA	NA	NA	21.858	-0.035302	0.92672	0.994877	37.4313	1.51334	4.38685e-06	7.72215e-05	NA	NA	NA	NA	TRUE	-0.2815	0.3907	0.9999	TRUE	1.045	8.075e-05	0.0005682
ENSMUSG00000037509	Arhgef4	none	280.628	0.0945386	0.618636	0.870455	251.88	0.247166	0.129038	0.567209	142.185	0.114558	0.545514	0.980148	430.402	0.832995	1.00339e-08	2.97186e-07	22.556	-1.88305	0.0060321	0.049859	TRUE	-0.08358	0.426	0.9999	TRUE	-0.1118	0.2933	0.4795
ENSMUSG00000004562	Arhgef40	none	22.1474	0.233458	0.677225	NA	5.28435	0.307605	0.71335	NA	38.2864	0.379422	0.24046	0.908037	94.8883	-0.194352	0.43062	0.670396	82.8282	-1.58194	0.000218832	0.00350102	TRUE	-0.1416	0.2914	0.9999	TRUE	0.5927	8.759e-07	8.761e-06
ENSMUSG00000031133	Arhgef6	none	17.5007	0.171904	0.791065	NA	96.3469	0.232689	0.302646	0.759062	137.698	0.186315	0.305673	0.939405	38.4249	0.420448	0.165137	0.386347	248.284	-0.516169	0.0648925	0.264248	TRUE	0.1566	0.2276	0.9954	TRUE	0.07648	0.4798	0.6607
ENSMUSG00000031511	Arhgef7	none	665.279	0.00339099	0.98085	0.99665	650.381	0.183826	0.127103	0.565465	346.806	-0.139494	0.337446	0.948922	225.994	0.105433	0.534037	0.750976	128.724	1.11634	0.00100667	0.0125115	TRUE	0.01473	0.8686	0.9999	TRUE	-0.03771	0.683	0.8154
ENSMUSG00000025656	Arhgef9	none	1457.14	-0.0102396	0.930158	0.98367	1432.54	-0.0623713	0.542094	0.893429	506.823	0.0828721	0.511664	0.977729	490.31	-0.224639	0.118869	0.315481	63.5054	-1.39953	0.00254643	0.0259631	TRUE	-0.1801	0.1092	0.9015	TRUE	-0.3306	0.005826	0.02369
ENSMUSG00000007880	Arid1a	none	915.799	-0.129127	0.308932	0.688113	877.253	0.13891	0.286178	0.748442	390.461	0.0831429	0.601656	0.988775	353.908	-0.633626	0.000174956	0.00199018	257.917	-0.333534	0.211101	0.534575	TRUE	-0.0645	0.4671	0.9999	TRUE	-0.1754	0.06148	0.1547
ENSMUSG00000069729	Arid1b	none	638.787	0.0779468	0.595408	0.859251	757.541	0.0295831	0.789034	0.963002	333.785	-0.194935	0.221645	0.897464	183.148	-0.417992	0.0191051	0.0898366	117.349	0.21265	0.542237	0.819379	TRUE	-0.1503	0.1322	0.9382	TRUE	-0.148	0.1243	0.2608
ENSMUSG00000033237	Arid2	none	235.763	0.0456615	0.815256	0.951136	242.645	0.29414	0.0618416	0.413027	271.073	-0.299682	0.0833738	0.717886	261.691	-0.613711	0.000837693	0.00751802	132.468	0.0864648	0.788466	0.931166	TRUE	0.1359	0.1822	0.9878	TRUE	-0.03446	0.7499	0.8587
ENSMUSG00000019564	Arid3a	none	7.41831	1.52579	0.135082	NA	5.46603	0.142671	0.863739	NA	5.82704	0.475265	0.522558	0.977956	NA	NA	NA	NA	29.6943	0.0134803	0.98145	0.993629	TRUE	-0.07067	0.7206	0.9999	TRUE	0.1732	0.3309	0.5209
ENSMUSG00000004661	Arid3b	none	8.17608	-0.40132	0.660315	NA	NA	NA	NA	NA	NA	NA	NA	NA	4.75378	0.319919	0.690738	0.851037	18.4606	-1.36012	0.0661298	0.267953	TRUE	-0.1575	0.4435	0.9999	TRUE	-0.1655	0.3868	0.5752
ENSMUSG00000048118	Arid4a	none	233.704	-0.0696124	0.728002	0.920823	322.343	0.0893181	0.558247	0.899293	137.026	-0.452806	0.0134882	0.390277	118.671	-0.779006	0.000340299	0.00348501	125.142	-0.109598	0.741894	0.913908	TRUE	-0.02554	0.8126	0.9999	TRUE	-0.06092	0.6062	0.7614
ENSMUSG00000039219	Arid4b	none	333.421	-0.314137	0.0648188	0.35854	503.307	-8.29796e-05	0.999545	0.999853	359.274	-0.375409	0.0142284	0.398767	152.785	-0.529011	0.0125384	0.0655825	121.811	0.552235	0.102419	0.353937	TRUE	0.004487	0.9699	0.9999	TRUE	0.1458	0.1274	0.2656
ENSMUSG00000037447	Arid5a	none	19.9491	0.392608	0.511064	NA	8.98763	1.18198	0.0811938	NA	19.8321	1.54379	0.000401775	0.0749048	65.8123	0.215746	0.387633	0.632959	20.718	-0.38725	0.568944	0.830525	TRUE	0.1229	0.4995	0.9999	TRUE	1.03	6.259e-15	1.405e-13
ENSMUSG00000019947	Arid5b	none	292.659	0.296856	0.108004	0.45021	250.956	-0.154256	0.304466	0.759835	133.474	0.0257312	0.900804	0.994132	97.9687	0.249503	0.254818	0.501455	75.6433	0.0628871	0.876801	0.967393	TRUE	0.1606	0.2699	0.9999	TRUE	0.05244	0.7166	0.8381
ENSMUSG00000025234	Arih1	none	488.078	-0.330939	0.0339318	0.259241	465.177	-0.044017	0.728219	0.948749	255.792	0.051399	0.736197	0.994132	214.175	-0.0939921	0.569604	0.775456	129.477	0.29772	0.39066	0.713222	TRUE	0.0966	0.2983	0.9999	TRUE	-0.1535	0.09614	0.216
ENSMUSG00000064145	Arih2	none	67.7256	-0.00710654	0.982988	NA	72.5154	0.0189055	0.942936	0.990088	27.8921	0.377565	0.329883	0.94749	40.1621	0.0790608	0.787954	0.905479	20.2873	0.701905	0.323205	0.655819	TRUE	-0.04571	0.6483	0.9999	TRUE	-0.02368	0.809	0.8943
ENSMUSG00000060904	Arl1	none	609.832	-0.118753	0.412635	0.759427	790.562	-0.00536932	0.97224	0.994613	374.207	-0.0222962	0.883461	0.994132	367.992	0.153188	0.322713	0.572446	132.682	0.340631	0.304458	0.639324	TRUE	0.04673	0.6416	0.9999	TRUE	-0.02895	0.7712	0.8721
ENSMUSG00000025870	Arl10	none	29.1265	0.238128	0.635339	NA	33.094	-0.34667	0.339642	0.788037	18.0557	0.404237	0.346597	0.950864	51.2677	-0.110105	0.699804	0.856143	25.8546	0.410249	0.508174	0.799172	TRUE	0.1746	0.3641	0.9999	TRUE	-0.04379	0.7915	0.8839
ENSMUSG00000022911	Arl13b	none	24.8602	-0.105382	0.84811	NA	25.4455	-0.292508	0.481749	0.869218	10.584	-0.273217	0.647563	0.991361	39.936	0.333068	0.280712	0.530239	23.5039	0.414516	0.536684	0.816473	TRUE	0.1359	0.4483	0.9999	TRUE	0.21	0.1807	0.3425
ENSMUSG00000027122	Arl14ep	none	288.737	-0.262931	0.14082	0.502629	501.76	-0.0337595	0.781411	0.960515	266.714	-0.085581	0.577543	0.983338	278.83	-0.00104533	0.99526	0.997496	101.725	0.310264	0.399146	0.71896	NA	NA	NA	NA	NA	NA	NA	NA
ENSMUSG00000042348	Arl15	none	212.815	0.303094	0.146458	0.508146	404.026	0.094097	0.507435	0.879949	56.1683	-0.0545787	0.836294	0.994132	91.4752	0.352638	0.129384	0.332024	29.0747	0.180602	0.757843	0.921222	TRUE	-0.1364	0.2241	0.9954	TRUE	-0.1782	0.1007	0.2234
ENSMUSG00000057594	Arl16	none	52.431	-0.264926	0.474174	NA	55.1249	0.0917414	0.751626	0.953535	42.7036	-0.309775	0.315658	0.940059	48.2049	0.463864	0.101565	0.285366	13.5139	-0.223769	0.806861	0.939203	TRUE	-0.2222	0.1149	0.9134	TRUE	-0.0341	0.7878	0.882
ENSMUSG00000024944	Arl2	none	393.777	0.285367	0.0777132	0.38734	285.072	-0.06542	0.65419	0.931254	350.943	0.280372	0.075307	0.699256	408.64	0.75484	9.70136e-07	2.0189e-05	78.5528	0.218452	0.596198	0.844253	TRUE	-0.1537	0.3245	0.9999	TRUE	0.2243	0.1251	0.2621
ENSMUSG00000031776	Arl2bp	none	189.269	0.0824289	0.695358	0.90829	181.942	-0.411789	0.0132088	0.18014	154.676	-0.109517	0.547295	0.980148	582.146	0.136008	0.404685	0.647822	34.6864	0.577092	0.292711	0.626022	TRUE	-0.02816	0.7466	0.9999	TRUE	-0.04558	0.5977	0.7547
ENSMUSG00000025035	Arl3	none	915.054	-0.0861009	0.518087	0.82	826.77	-0.26986	0.0208573	0.233416	900.216	-0.0974306	0.445811	0.9661	1053.49	0.0396321	0.775347	0.900273	111.666	0.0256793	0.940148	0.986338	TRUE	0.003478	0.9735	0.9999	TRUE	-0.2079	0.03719	0.1059
ENSMUSG00000047446	Arl4a	none	125.463	-0.38894	0.123035	0.479006	99.6779	-0.20738	0.348963	0.796023	181.996	-0.731265	0.00132319	0.142978	105.748	0.190811	0.396064	0.640646	19.4796	-0.519887	0.45601	0.763666	TRUE	0.0983	0.4556	0.9999	TRUE	-0.07971	0.5139	0.6899
ENSMUSG00000049866	Arl4c	none	65.6922	-0.0315518	0.924208	NA	21.4102	-0.673712	0.149519	0.597468	327.991	0.111814	0.466438	0.970586	75.9345	0.382968	0.107417	0.295641	189.762	1.30958	1.94026e-05	0.000437163	TRUE	0.02323	0.8712	0.9999	TRUE	0.2349	0.03197	0.09357
ENSMUSG00000034936	Arl4d	none	39.6955	-0.483376	0.264187	NA	24.5125	0.946972	0.0208138	0.233416	22.5623	0.1908	0.639032	0.991361	12.2829	0.696383	0.204554	0.439235	NA	NA	NA	NA	TRUE	-0.2928	0.1907	0.9878	TRUE	-0.5179	0.005204	0.02161
ENSMUSG00000036093	Arl5a	none	112.184	-0.119756	0.657962	0.892297	110.618	-0.00577231	0.977536	0.994613	149.082	-0.153794	0.413313	0.958839	222.661	0.0957922	0.584723	0.785943	80.5126	0.728984	0.0656206	0.266212	TRUE	0.122	0.1928	0.9878	TRUE	-0.07377	0.4103	0.5986
ENSMUSG00000017418	Arl5b	none	73.8375	-0.377523	0.251957	NA	116.158	0.0498501	0.812354	0.968549	63.3645	-0.45552	0.0769526	0.702568	58.0324	-0.177556	0.499142	0.725563	21.5257	0.558683	0.421204	0.738719	TRUE	0.04542	0.7981	0.9999	TRUE	-0.241	0.1279	0.2664
ENSMUSG00000022722	Arl6	none	215.294	-0.156346	0.456351	0.78562	187.536	-0.295456	0.0766868	0.461294	112.298	-0.36328	0.0827712	0.71557	135.929	-0.270997	0.167655	0.390511	18.3724	0.239293	0.748782	0.917899	TRUE	0.2164	0.1331	0.9382	TRUE	-0.1098	0.4003	0.5889
ENSMUSG00000030654	Arl6ip1	none	1995.56	0.0602326	0.593821	0.858564	2227.44	-0.01804	0.897377	0.982009	1432.19	-0.0154175	0.897846	0.994132	3820.57	0.119716	0.41842	0.659643	705.39	0.308798	0.200652	0.522568	TRUE	0.2688	0.01834	0.4803	TRUE	-0.06985	0.5073	0.6846
ENSMUSG00000029404	Arl6ip4	none	60.2569	0.131257	0.705921	NA	31.9106	-0.258665	0.476957	0.867468	33.7686	-0.353858	0.309999	0.939405	28.6265	-0.14746	0.671959	0.840007	22.9704	-0.0544328	0.932668	0.984753	TRUE	-0.1755	0.204	0.9922	TRUE	-0.003863	0.975	0.9884
ENSMUSG00000035199	Arl6ip5	none	1106.85	-0.164552	0.207767	0.593483	981.442	-0.128996	0.231597	0.700593	909.269	-0.236058	0.0588448	0.646907	1060.22	-0.0559646	0.656902	0.831598	344.248	0.632476	0.0110023	0.0767329	TRUE	-0.1014	0.2849	0.9999	TRUE	-0.1649	0.07639	0.1821
ENSMUSG00000026960	Arl6ip6	none	21.7769	0.230027	0.685922	NA	18.1297	0.50533	0.291618	0.751809	25.6057	0.0496136	0.894188	0.994132	47.5913	-0.289111	0.308948	0.559684	22.6126	0.268644	0.68155	0.89004	TRUE	0.08278	0.6847	0.9999	TRUE	0.4293	0.02694	0.08204
ENSMUSG00000026426	Arl8a	none	1200.35	0.0917031	0.453384	0.782916	1289.32	-0.0416177	0.75354	0.953744	658.532	0.00645512	0.958055	0.996155	1310.31	0.454091	0.000645884	0.00601477	379.64	0.66297	0.00715621	0.0566367	TRUE	-0.05775	0.5192	0.9999	TRUE	0.04428	0.6472	0.7896
ENSMUSG00000030105	Arl8b	none	1477.02	-0.174977	0.143065	0.504171	2391.76	0.0950742	0.455152	0.858103	938.633	0.205554	0.0993676	0.755029	1068.26	0.364277	0.00380031	0.0259425	450.372	0.851448	0.000640646	0.00867711	TRUE	0.01307	0.8893	0.9999	TRUE	-0.2002	0.0355	0.1018
ENSMUSG00000027599	Armc1	none	589.469	-0.148162	0.303868	0.685083	618.595	0.0804162	0.509707	0.880376	374.587	0.0776359	0.597215	0.988481	366.548	-0.20976	0.169411	0.393109	74.0949	0.081458	0.837482	0.952442	TRUE	-0.007768	0.9336	0.9999	TRUE	-0.2541	0.009066	0.03395
ENSMUSG00000038525	Armc10	none	65.4402	0.156093	0.646557	NA	63.1258	0.0258362	0.920717	0.984722	16.3165	0.386549	0.388811	0.957654	30.7359	0.528354	0.112838	0.305182	24.6465	0.100829	0.873612	0.966185	TRUE	-0.04644	0.7483	0.9999	TRUE	0.06225	0.5923	0.7511
ENSMUSG00000071324	Armc2	none	54.171	0.0568541	0.876178	NA	40.1096	-0.315103	0.349357	0.796084	12.2823	0.564018	0.272287	0.924628	25.4113	-0.27157	0.478778	0.711301	6.73566	2.88176	0.05065	0.222275	TRUE	0.2243	0.2562	0.9999	TRUE	-0.1851	0.2764	0.4602
ENSMUSG00000061802	Armc4	none	NA	NA	NA	NA	NA	NA	NA	NA	8.0887	0.850403	0.204823	0.885856	14.4577	-0.647028	0.208646	0.444638	NA	NA	NA	NA	TRUE	0.8682	0.1124	0.9058	TRUE	0.8197	0.0316	0.09263
ENSMUSG00000042178	Armc5	none	31.9481	0.2105	0.668078	NA	18.3608	0.149966	0.769772	0.958821	20.2577	0.424492	0.298831	0.939109	22.6391	-0.0257034	0.945695	0.980019	27.6581	0.416282	0.508948	0.799173	TRUE	-0.2876	0.231	0.9954	TRUE	0.6971	5.44e-05	0.000397
ENSMUSG00000002343	Armc6	none	190.326	0.0640208	0.77194	0.938057	174.181	-0.192047	0.287555	0.749053	68.5498	0.404931	0.114471	0.777081	48.3319	-0.791357	0.00697249	0.0421063	13.414	-0.915718	0.271196	0.603282	TRUE	-0.1024	0.5365	0.9999	TRUE	-0.164	0.3247	0.515
ENSMUSG00000057219	Armc7	none	39.1689	-0.409609	0.361324	NA	23.0516	-0.055649	0.897851	0.982009	13.6831	0.537679	0.273548	0.924628	15.1772	0.0715555	0.876627	0.949138	21.2875	-0.0520384	0.944155	0.986842	TRUE	-0.18	0.3802	0.9999	TRUE	0.1198	0.5302	0.7018
ENSMUSG00000032468	Armc8	none	747.699	-0.0283506	0.830258	0.954345	800.619	0.078071	0.491789	0.874378	363.574	0.121469	0.390046	0.957654	263.334	-0.285635	0.0917057	0.26642	92.8916	0.18122	0.622755	0.858702	TRUE	-0.1154	0.2075	0.9954	TRUE	-0.1923	0.06349	0.1584
ENSMUSG00000062590	Armc9	none	238.576	0.0767807	0.709039	0.915277	205.937	0.242919	0.128683	0.566898	86.9018	0.390833	0.0820648	0.712637	66.0953	0.28513	0.241316	0.484328	14.3829	-0.757861	0.352875	0.684551	TRUE	0.07622	0.5124	0.9999	TRUE	-0.009798	0.9274	0.9646
ENSMUSG00000033460	Armcx1	none	562.006	-0.26884	0.0611567	0.350594	572.516	-0.190886	0.133316	0.573276	471.236	0.0906316	0.495787	0.976814	184.556	-0.211188	0.258279	0.505233	25.3829	-1.92356	0.00269395	0.0270507	TRUE	0.04781	0.6277	0.9999	TRUE	-0.421	5.282e-05	0.0003866
ENSMUSG00000033436	Armcx2	none	585.958	-0.312544	0.0313562	0.250963	623.515	-0.0707535	0.567002	0.902987	549.309	-0.137944	0.300092	0.939405	311.37	-0.267484	0.11594	0.310659	61.0966	-0.840072	0.0471781	0.211795	TRUE	-0.0001555	0.9986	0.9999	TRUE	-0.3693	1.991e-05	0.0001588
ENSMUSG00000049047	Armcx3	none	22.5158	0.273764	0.62533	NA	22.7494	0.0477242	0.915087	0.984076	19.1415	0.632131	0.135897	0.813487	13.8771	-0.336328	0.505136	0.7293	NA	NA	NA	NA	TRUE	0.01134	0.9126	0.9999	TRUE	-0.1211	0.2314	0.4088
ENSMUSG00000049804	Armcx4	none	201.412	0.108604	0.597215	0.859784	343.759	0.0880333	0.510764	0.880606	126.683	-0.00641808	0.975242	0.997323	207.089	-0.230854	0.177627	0.40379	14.8845	-1.7344	0.031809	0.163913	TRUE	-0.1156	0.199	0.9886	TRUE	-0.2134	0.03645	0.104
ENSMUSG00000072969	Armcx5	none	130.326	-0.247228	0.314043	0.691431	136.455	0.191331	0.334715	0.783428	64.1831	0.0656767	0.787851	0.994132	41.4511	0.0818905	0.817008	0.920641	11.4718	0.505207	0.586756	0.838655	TRUE	-0.444	0.0001546	0.03326	TRUE	0.1298	0.2465	0.4259
ENSMUSG00000050394	Armcx6	none	16.9555	-1.0368	0.117275	NA	20.9773	-0.418501	0.33661	0.784921	32.1543	0.607075	0.0639606	0.665047	44.2299	0.39293	0.169633	0.393109	7.6641	0.606949	0.582966	0.836851	TRUE	0.09531	0.6936	0.9999	TRUE	-0.0324	0.8802	0.9377
ENSMUSG00000039901	Armh3	none	216.3	0.0296213	0.884196	0.971074	259.232	0.0419302	0.783388	0.961349	118.116	0.277005	0.157911	0.839824	85.7033	-0.00603176	0.978011	0.990483	45.2877	-0.390492	0.425485	0.742807	NA	NA	NA	NA	NA	NA	NA	NA
ENSMUSG00000036242	Armh4	none	442.375	-0.303144	0.0965767	0.426222	371.672	-0.680017	1.72037e-07	3.10613e-05	3827.03	-0.723359	0.0327035	0.523358	383.157	-0.16477	0.482193	0.713849	49.7598	-0.774047	0.119228	0.388105	NA	NA	NA	NA	NA	NA	NA	NA
ENSMUSG00000061759	Armt1	none	239.462	-0.185967	0.347532	0.71501	312.415	-0.311532	0.0267207	0.26624	127.433	-0.000969619	0.995853	0.998298	91.9942	-0.00763634	0.973428	0.989172	25.4968	0.872812	0.172198	0.482956	NA	NA	NA	NA	NA	NA	NA	NA
ENSMUSG00000015522	Arnt	none	117.813	-0.170274	0.505954	0.812447	111.369	-0.0721295	0.729644	0.948749	53.8907	0.0992208	0.708552	0.992723	65.1382	-0.628714	0.0114236	0.0614864	124.959	-0.00721573	0.982846	0.994222	TRUE	0.03218	0.7359	0.9999	TRUE	-0.04489	0.6419	0.7863
ENSMUSG00000015709	Arnt2	none	1596.83	0.271357	0.0171705	0.177249	1034.75	0.185119	0.103583	0.518109	346.617	0.059922	0.692646	0.992723	839.144	0.16736	0.252343	0.498636	51.6168	-1.07595	0.023886	0.133223	TRUE	-0.1141	0.3815	0.9999	TRUE	-0.007016	0.9528	0.978
ENSMUSG00000055116	Arntl	none	461.116	-0.181222	0.246958	0.636435	429.754	0.257693	0.0721196	0.446952	194.071	-0.258165	0.137727	0.815721	145.276	-0.450446	0.0444945	0.164049	36.8883	-0.934628	0.0769154	0.29468	TRUE	0.1342	0.2634	0.9999	TRUE	-0.8282	1.703e-09	2.412e-08
ENSMUSG00000040187	Arntl2	none	19.7167	-1.03348	0.0849783	NA	14.7632	-0.394325	0.456736	0.858949	NA	NA	NA	NA	3.96751	-0.382507	0.666052	0.836947	NA	NA	NA	NA	TRUE	-0.3	0.09641	0.8769	TRUE	-0.03061	0.8667	0.9304
ENSMUSG00000029621	Arpc1a	none	1325.57	0.00732174	0.954418	0.990721	2007.59	0.0363835	0.737807	0.950264	473.013	0.0399631	0.759452	0.994132	395.979	0.260464	0.0939364	0.270916	81.6446	-0.828741	0.0350133	0.174832	TRUE	-0.07851	0.4273	0.9999	TRUE	-0.08826	0.3445	0.5341
ENSMUSG00000029622	Arpc1b	none	8.4775	0.637925	0.502688	NA	NA	NA	NA	NA	NA	NA	NA	NA	57.1839	2.85388	2.41162e-18	1.85098e-16	300.8	0.102986	0.704784	0.900453	TRUE	0.01904	0.9148	0.9999	TRUE	2.456	3.099e-57	5.279e-55
ENSMUSG00000006304	Arpc2	none	1571.46	0.0103102	0.932377	0.9845	3635.05	0.304187	0.00472488	0.0961961	528.274	0.0447763	0.725622	0.993949	779.914	0.310447	0.0362188	0.14352	1285.72	0.326017	0.177921	0.490662	TRUE	-0.07562	0.4356	0.9999	TRUE	-0.1422	0.2086	0.3804
ENSMUSG00000029465	Arpc3	none	1459.74	0.13396	0.251188	0.641392	2269.21	0.209837	0.0398876	0.329849	487.356	0.0992756	0.452815	0.967703	508.459	0.312859	0.0375924	0.146992	621.187	0.453135	0.0500879	0.220569	TRUE	-0.1066	0.2552	0.9999	TRUE	-0.08829	0.3279	0.5177
ENSMUSG00000079426	Arpc4	none	1407.03	-0.0370175	0.775181	0.939291	2329.77	0.122822	0.227664	0.696709	805.047	0.15287	0.225962	0.898818	1438.28	0.363432	0.00678182	0.0411638	1272.12	0.580625	0.012767	0.0857298	TRUE	-0.1118	0.2505	0.9999	TRUE	0.1213	0.1808	0.3425
ENSMUSG00000008475	Arpc5	none	297.228	0.134646	0.480313	0.799952	807.389	0.168407	0.158429	0.612951	81.2197	0.258555	0.237597	0.908037	321.305	0.941	3.32489e-08	9.11057e-07	512.259	0.933659	0.000102168	0.00184227	TRUE	0.03004	0.7372	0.9999	TRUE	-0.0341	0.7238	0.8424
ENSMUSG00000026755	Arpc5l	none	476.586	-0.156099	0.326825	0.69899	506.295	-0.0918242	0.513936	0.881466	434.295	-0.184564	0.196985	0.878819	394.493	-0.105565	0.472079	0.707104	137.129	0.239573	0.450385	0.760816	TRUE	0.04392	0.6906	0.9999	TRUE	-0.1574	0.1301	0.2698
ENSMUSG00000039043	Arpin	none	84.6021	0.110194	0.709883	NA	73.3539	-0.0163197	0.945906	0.990412	85.2302	0.0755237	0.741226	0.994132	151.423	0.482506	0.0117029	0.0624796	6.09704	-0.418138	0.727977	0.909126	NA	NA	NA	NA	NA	NA	NA	NA
ENSMUSG00000007656	Arpp19	none	1873.18	-0.210971	0.12438	0.481366	443.902	0.0363702	0.7987	0.966096	251.336	-0.356246	0.0207482	0.452774	717.675	-0.0442779	0.796689	0.910294	232.81	0.446821	0.114813	0.380647	TRUE	-0.0176	0.8843	0.9999	TRUE	-0.456	0.0007047	0.003859
ENSMUSG00000032503	Arpp21	none	1865.25	-0.246745	0.062825	0.352816	639.927	-0.186011	0.224206	0.692762	162.069	0.0500941	0.795259	0.994132	544.4	-0.197408	0.221275	0.460284	53.9748	-1.43139	0.00346997	0.03319	TRUE	-0.2625	0.0498	0.7248	TRUE	-0.3077	0.04066	0.1135
ENSMUSG00000060890	Arr3	none	5.16245	0.0503031	0.964463	NA	3.46591	1.38943	0.251384	NA	NA	NA	NA	NA	NA	NA	NA	NA	NA	NA	NA	NA	TRUE	-0.9022	0.01805	0.4803	TRUE	0.2447	0.451	0.6357
ENSMUSG00000018909	Arrb1	none	611.517	0.15347	0.30934	0.688113	329.614	-0.134907	0.348101	0.795525	335.456	0.196634	0.213907	0.890745	730.953	-0.305211	0.0585464	0.196337	166.961	-1.17536	8.34583e-05	0.00156204	TRUE	-0.02352	0.8397	0.9999	TRUE	-0.1357	0.2555	0.4368
ENSMUSG00000060216	Arrb2	none	127.942	-0.0612384	0.808668	0.948615	170.773	0.326403	0.075081	0.457711	57.1105	-0.201985	0.419418	0.960092	53.1891	0.170779	0.520898	0.741119	296.342	-0.291726	0.287732	0.620271	TRUE	0.05073	0.6281	0.9999	TRUE	0.1304	0.2075	0.3788
ENSMUSG00000026972	Arrdc1	none	16.0798	0.67447	0.314389	NA	6.40628	0.479213	0.539063	NA	5.95958	-0.0211562	0.976612	0.997323	6.9913	0.555951	0.420523	0.661166	28.5983	-0.0416328	0.945295	0.987119	TRUE	-0.1316	0.5771	0.9999	TRUE	0.733	1.111e-05	9.26e-05
ENSMUSG00000002910	Arrdc2	none	12.3952	0.574195	0.462168	NA	9.60576	0.626635	0.338148	NA	NA	NA	NA	NA	10.4357	0.934986	0.103899	0.289765	5.5056	-0.0512223	0.968435	0.991725	TRUE	-0.1233	0.5281	0.9999	TRUE	0.6791	0.0002477	0.001534
ENSMUSG00000074794	Arrdc3	none	109.977	-0.547504	0.0376179	0.272711	121.317	-0.370291	0.0823397	0.476179	67.7556	-0.322999	0.179983	0.862487	124.497	-0.344296	0.0968248	0.276068	46.0616	-1.20734	0.0122426	0.0830502	TRUE	0.1072	0.3969	0.9999	TRUE	-0.1306	0.3228	0.5129
ENSMUSG00000042659	Arrdc4	none	15.9347	0.0943785	0.885337	NA	32.3528	0.195553	0.593673	0.909682	13.7146	0.239424	0.642388	0.991361	14.2632	1.00647	0.0410494	0.155567	41.5849	1.30371	0.0166427	0.103082	TRUE	0.04593	0.7812	0.9999	TRUE	0.4122	0.008071	0.03092
ENSMUSG00000022620	Arsa	none	137.15	0.203826	0.405962	0.755527	84.3464	0.0386859	0.872575	0.978025	92.5783	-0.400509	0.0710982	0.685621	284.855	0.230113	0.22266	0.461684	115.376	0.377474	0.269011	0.601115	TRUE	0.009634	0.9358	0.9999	TRUE	0.4619	5.455e-05	0.0003977
ENSMUSG00000042082	Arsb	none	935.093	0.0403667	0.748571	0.928263	1051.69	-0.128367	0.245477	0.713126	381.708	-0.165433	0.332743	0.948863	2047.73	0.240383	0.109173	0.298594	959.946	-0.37589	0.0746973	0.289064	TRUE	-0.1069	0.2088	0.9954	TRUE	0.2257	0.0144	0.04941
ENSMUSG00000020604	Arsg	none	31.6366	0.383654	0.424456	NA	15.0779	0.377175	0.456995	0.858949	35.7821	0.0255809	0.935712	0.995591	83.4337	1.08187	3.08769e-06	5.63681e-05	98.1988	0.222017	0.533326	0.814233	TRUE	0.1537	0.4423	0.9999	TRUE	0.1441	0.222	0.3972
ENSMUSG00000036412	Arsi	none	NA	NA	NA	NA	6.18602	1.38523	0.0996987	NA	NA	NA	NA	NA	NA	NA	NA	NA	NA	NA	NA	NA	TRUE	0.2687	0.4823	0.9999	TRUE	-0.4194	0.2179	0.3918
ENSMUSG00000046561	Arsj	none	16.6925	0.784082	0.230238	NA	18.4991	1.07402	0.0283909	0.271794	NA	NA	NA	NA	11.6541	0.10758	0.835582	0.928288	NA	NA	NA	NA	TRUE	-0.3127	0.3183	0.9999	TRUE	0.7902	0.0008073	0.004339
ENSMUSG00000021592	Arsk	none	17.1593	0.24731	0.695342	NA	19.8682	0.00582593	0.989893	0.997825	17.8497	-0.419618	0.334522	0.948922	527.105	-0.486922	0.00371541	0.0254704	224.274	-0.0695068	0.800879	0.936435	TRUE	0.1994	0.2949	0.9999	TRUE	0.4662	0.003549	0.01567
ENSMUSG00000031982	Arv1	none	23.7809	-0.121168	0.827887	NA	17.913	-0.0810436	0.864778	0.977123	12.9665	-0.0226009	0.963474	0.997183	17.5372	0.433501	0.331033	0.580998	8.65544	0.1925	0.854481	0.958818	TRUE	-0.133	0.5087	0.9999	TRUE	-0.07744	0.6636	0.8018
ENSMUSG00000000325	Arvcf	none	101.17	0.608864	0.0346324	0.262318	53.6418	0.0282701	0.921419	0.984722	28.7035	0.233948	0.535678	0.979472	69.1784	0.743669	0.00206668	0.0158198	47.01	-0.85468	0.10265	0.354429	TRUE	0.06793	0.6339	0.9999	TRUE	0.4977	4.224e-05	0.0003147
ENSMUSG00000035277	Arx	none	22.2257	-0.357263	0.538503	NA	NA	NA	NA	NA	76.138	0.310786	0.217589	0.894572	23.5557	-0.335224	0.36911	0.615666	NA	NA	NA	NA	TRUE	0.1389	0.501	0.9999	TRUE	0.0798	0.668	0.8049
ENSMUSG00000003559	As3mt	none	13.6887	1.12606	0.132902	NA	12.4963	0.874937	0.137176	0.578446	14.2682	1.21116	0.012497	0.381856	171.665	0.255639	0.155478	0.373423	111.685	-0.022872	0.950421	0.987552	TRUE	0.07185	0.703	0.9999	TRUE	0.6718	5.966e-05	0.0004313
ENSMUSG00000031591	Asah1	none	562.388	-0.0813524	0.596796	0.859784	461.142	0.0826569	0.523576	0.884031	665.221	-0.065372	0.638728	0.991361	2688.25	-0.0660793	0.655219	0.831256	3568.35	0.91762	2.76545e-06	7.9617e-05	TRUE	0.05197	0.6171	0.9999	TRUE	0.5822	1.749e-08	2.196e-07
ENSMUSG00000024887	Asah2	none	121.174	0.0576543	0.824225	0.953827	60.9594	-0.358751	0.185708	0.652114	585.535	-0.250566	0.139054	0.816426	182.632	0.34081	0.0858362	0.255878	195.848	0.119608	0.673589	0.886932	TRUE	-0.08041	0.6566	0.9999	TRUE	-0.08397	0.5848	0.7453
ENSMUSG00000022377	Asap1	none	1372.73	-0.352733	0.00262652	0.0606717	705.326	-0.187731	0.165984	0.62569	626.309	0.0131791	0.91997	0.994579	321.055	-0.485592	0.00238185	0.0176733	225.688	0.397474	0.16424	0.469216	TRUE	-0.07297	0.6086	0.9999	TRUE	-0.2552	0.02026	0.06503
ENSMUSG00000052632	Asap2	none	409.988	-0.29163	0.0825383	0.396256	556.378	-0.142906	0.332901	0.782507	184.823	-0.120318	0.491225	0.975974	249.126	-0.0445916	0.823618	0.923289	17.5531	-1.24479	0.0922131	0.332755	TRUE	0.09078	0.4122	0.9999	TRUE	0.04264	0.6644	0.8021
ENSMUSG00000036995	Asap3	none	NA	NA	NA	NA	NA	NA	NA	NA	7.08613	-0.326904	0.623852	0.990737	29.7304	2.28855	9.58371e-09	2.86589e-07	21.9757	0.187292	0.787974	0.931085	TRUE	0.1063	0.6282	0.9999	TRUE	2.193	1.68e-21	6.004e-20
ENSMUSG00000026311	Asb1	none	68.88	0.0731584	0.82507	NA	40.9794	-0.0910447	0.777486	0.959607	26.9959	0.0271543	0.941285	0.995591	44.4483	-0.0670428	0.818127	0.921288	7.81126	-0.970861	0.365007	0.694749	TRUE	-0.07616	0.4397	0.9999	TRUE	-0.2044	0.0389	0.1096
ENSMUSG00000031382	Asb11	none	30.508	0.220807	0.646408	NA	17.7136	1.0023	0.0363079	0.31142	9.14638	0.922902	0.126576	0.798348	NA	NA	NA	NA	3.70486	0.94036	0.581817	0.83639	TRUE	-0.9847	0.001084	0.1106	TRUE	-0.3027	0.3426	0.5321
ENSMUSG00000033781	Asb13	none	258.995	0.346121	0.0669414	0.362372	135.936	-0.190265	0.305729	0.761179	216.202	0.584062	0.000346693	0.0675736	89.2709	0.487779	0.0252677	0.110448	45.5596	-0.448957	0.402976	0.72211	TRUE	-0.1379	0.1741	0.9835	TRUE	-0.0714	0.4921	0.671
ENSMUSG00000034768	Asb16	none	7.94266	0.787416	0.404701	NA	5.6787	-0.906663	0.274062	NA	11.0911	0.621865	0.268345	0.922347	6.68559	0.174791	0.800235	0.911599	NA	NA	NA	NA	TRUE	-0.000433	0.9994	0.9999	TRUE	-0.4367	0.3376	0.5274
ENSMUSG00000067081	Asb18	none	NA	NA	NA	NA	11.422	0.933561	0.12394	NA	6.33039	0.404187	0.559431	0.980439	NA	NA	NA	NA	NA	NA	NA	NA	TRUE	0.2987	0.5098	0.9999	TRUE	-0.03414	0.9263	0.9642
ENSMUSG00000021200	Asb2	none	13.6888	2.03138	0.01037	NA	3.06377	3.01052	0.0422538	NA	9.19533	0.522764	0.389279	0.957654	NA	NA	NA	NA	48.2851	-1.63295	0.00105929	0.0130455	TRUE	-0.05736	0.8673	0.9999	TRUE	0.6378	0.03789	0.1073
ENSMUSG00000020305	Asb3	none	215.352	-0.387446	0.0630092	0.352816	268.648	-0.0254764	0.862585	0.977046	81.7993	0.241155	0.277849	0.925629	90.6459	-0.462517	0.0318523	0.13045	37.871	0.198886	0.718755	0.90664	TRUE	0.1281	0.387	0.9999	TRUE	0.01029	0.9395	0.971
ENSMUSG00000039483	Asb6	none	159.2	0.351326	0.130995	0.490736	146.962	-0.136845	0.493301	0.874565	48.4115	-0.0956252	0.726922	0.993949	43.9517	-0.156331	0.586226	0.787075	26.5051	-0.114226	0.852525	0.958012	TRUE	-0.02706	0.865	0.9999	TRUE	-0.0356	0.8093	0.8945
ENSMUSG00000030509	Asb7	none	81.3145	0.162021	0.597295	NA	70.8767	-0.0621551	0.802608	0.96757	39.5095	0.0649621	0.829612	0.994132	70.5907	0.0991051	0.686566	0.848314	19.1965	-0.153205	0.828256	0.948479	TRUE	-0.08854	0.5323	0.9999	TRUE	-0.02805	0.8172	0.8995
ENSMUSG00000048175	Asb8	none	238.835	0.0783544	0.685059	0.90307	198.749	-0.211884	0.202434	0.672292	146.528	0.0368108	0.834467	0.994132	215.272	0.290313	0.0867752	0.257601	50.5045	0.311932	0.506075	0.797675	TRUE	0.0003064	0.9977	0.9999	TRUE	-0.03805	0.7095	0.8334
ENSMUSG00000044475	Ascc1	none	102.48	-0.0243659	0.930193	0.98367	120.053	-0.217623	0.264175	0.730525	102.126	0.139332	0.491214	0.975974	100.551	0.00134978	0.994886	0.997332	56.6559	-0.396171	0.369881	0.697566	TRUE	0.1262	0.4602	0.9999	TRUE	0.08021	0.6153	0.7677
ENSMUSG00000020412	Ascc2	none	74.7834	0.103961	0.742751	NA	72.5541	0.120166	0.638714	0.92687	22.8336	-0.131592	0.731352	0.994132	64.2893	0.60321	0.0150285	0.0748856	45.2841	0.00652286	0.989198	0.996326	TRUE	0.04781	0.6631	0.9999	TRUE	0.02272	0.8296	0.907
ENSMUSG00000038774	Ascc3	none	283.79	-0.241767	0.194923	0.576234	409.907	0.229771	0.0729197	0.44934	101.911	0.090897	0.68627	0.991399	85.3757	0.11861	0.601022	0.796823	69.145	0.135537	0.743164	0.914247	TRUE	0.3353	0.0136	0.4216	TRUE	0.04282	0.7245	0.8427
ENSMUSG00000020052	Ascl1	none	11.8028	-0.736891	0.338033	NA	5.00921	0.0409818	0.964424	NA	NA	NA	NA	NA	12.8783	1.4474	0.0065328	0.0400956	NA	NA	NA	NA	TRUE	0.1153	0.6311	0.9999	TRUE	-0.3017	0.2608	0.4427
ENSMUSG00000019857	Asf1a	none	108.226	-0.201208	0.45187	0.782047	140.461	-0.126351	0.486361	0.871423	114.457	-0.0290605	0.896503	0.994132	190.93	-0.146605	0.393889	0.63885	41.4379	0.152717	0.763837	0.922824	TRUE	0.2021	0.2967	0.9999	TRUE	0.0718	0.6782	0.8124
ENSMUSG00000028053	Ash1l	none	1114.36	-0.378536	0.00286643	0.0643138	1333.16	0.0566539	0.61122	0.917849	554.309	0.0149733	0.90454	0.994132	383.809	-0.45362	0.00415751	0.0279569	123.715	-0.469772	0.155167	0.45385	TRUE	0.01072	0.9104	0.9999	TRUE	-0.1478	0.2068	0.3777
ENSMUSG00000031575	Ash2l	none	273.92	-0.190721	0.313033	0.690716	311.392	-0.0300537	0.838992	0.97213	218.958	-0.0525097	0.751417	0.994132	237.959	0.131119	0.42821	0.667896	108.914	-0.103883	0.77804	0.928557	TRUE	0.03313	0.7396	0.9999	TRUE	-0.08097	0.4203	0.6077
ENSMUSG00000023017	Asic1	none	314.755	-0.121554	0.486767	0.801862	62.0569	-0.330077	0.244353	0.712536	202.493	-0.293928	0.0804312	0.710141	218.271	-0.550986	0.00603428	0.0378778	15.4012	-2.30733	0.0043178	0.0389156	NA	NA	NA	NA	NA	NA	NA	NA
ENSMUSG00000020704	Asic2	none	260.64	-0.0978024	0.597359	0.859784	170.306	-0.129579	0.46288	0.861656	101.829	0.0602153	0.763765	0.994132	121.239	0.238675	0.256922	0.503753	16.6197	-2.29368	0.00919902	0.0673947	NA	NA	NA	NA	NA	NA	NA	NA
ENSMUSG00000033007	Asic4	none	75.25	-0.868937	0.00579823	NA	16.056	-2.09927	0.000129668	0.00789152	44.4832	0.0333268	0.904736	0.994132	37.8456	-0.0308701	0.922825	0.97142	NA	NA	NA	NA	NA	NA	NA	NA	NA	NA	NA	NA
ENSMUSG00000025533	Asl	none	70.6809	0.275667	0.399073	NA	67.5654	-0.20375	0.423775	0.842341	57.9024	0.404318	0.145769	0.825377	48.7997	0.520798	0.0686689	0.218919	48.7295	0.500806	0.287	0.619886	TRUE	0.1843	0.2451	0.9999	TRUE	0.2935	0.05173	0.1362
ENSMUSG00000052456	Asna1	none	734.411	0.199005	0.140625	0.502404	543.2	-0.00631176	0.956769	0.991736	338.3	0.282193	0.0630263	0.663493	336.984	0.363606	0.0185362	0.0879144	118.702	0.343967	0.318015	0.650925	TRUE	-0.03105	0.7448	0.9999	TRUE	-0.05974	0.5158	0.6908
ENSMUSG00000029752	Asns	none	1392.17	0.103337	0.395771	0.747428	1605.89	0.175029	0.0722948	0.447518	800.19	0.216097	0.0852359	0.723123	158.711	0.0107123	0.958045	0.983942	75.2544	-1.78979	0.000816631	0.0104999	TRUE	-0.05156	0.6105	0.9999	TRUE	-0.35	9.857e-05	0.0006799
ENSMUSG00000026095	Asnsd1	none	NA	NA	NA	NA	4.79873	-0.203202	0.819132	NA	NA	NA	NA	NA	NA	NA	NA	NA	NA	NA	NA	NA	TRUE	0.06891	0.6648	0.9999	TRUE	0.1268	0.3372	0.527
ENSMUSG00000020774	Aspa	none	19.3376	0.391076	0.515371	NA	4.54007	0.701139	0.453462	NA	11.7308	0.153537	0.771	0.994132	78.527	0.362003	0.118765	0.315381	11.3034	-1.5829	0.137814	0.423461	TRUE	-0.05282	0.7665	0.9999	TRUE	-0.06422	0.63	0.7781
ENSMUSG00000037686	Aspg	none	6.78644	1.09715	0.293955	NA	2.64695	4.67594	0.00325621	NA	NA	NA	NA	NA	68.1214	3.39612	3.02571e-24	3.36339e-22	NA	NA	NA	NA	TRUE	0.06269	0.8353	0.9999	TRUE	3.952	2.66e-79	1.133e-76
ENSMUSG00000028207	Asph	none	730.432	-0.309382	0.0374491	0.272368	679.001	-0.188236	0.100398	0.513301	3271.67	-0.54266	1.09773e-05	0.00588381	1676.16	-0.0919307	0.518949	0.740037	1426.73	0.648954	0.0018313	0.0199154	TRUE	0.01956	0.8213	0.9999	TRUE	0.102	0.2252	0.4011
ENSMUSG00000046378	Asphd1	none	131.771	-0.0266088	0.915567	0.979677	103.403	0.0306148	0.890709	0.980844	52.3284	0.245121	0.377254	0.957654	26.4297	-0.160884	0.651445	0.828585	4.52151	-2.22078	0.122733	0.393773	TRUE	-0.04039	0.8415	0.9999	TRUE	-0.1866	0.2369	0.4152
ENSMUSG00000029348	Asphd2	none	153.453	0.152526	0.516892	0.819542	180.874	0.187075	0.3249	0.774499	31.3277	0.158433	0.62546	0.991179	92.8081	-0.106685	0.626038	0.813667	NA	NA	NA	NA	TRUE	-0.1171	0.3498	0.9999	TRUE	-0.03165	0.7802	0.8778
ENSMUSG00000025142	Aspscr1	none	137.96	0.182412	0.473783	0.796281	90.0703	-0.12392	0.589777	0.909682	137.6	0.350437	0.0607263	0.656055	117.542	-0.168737	0.436368	0.676651	58.551	-0.004592	0.991607	0.99724	TRUE	-0.2391	0.06744	0.8073	TRUE	0.3001	0.01562	0.05274
ENSMUSG00000024654	Asrgl1	none	258.647	-0.0131512	0.944016	0.987089	211.41	0.141544	0.383987	0.819724	198.227	0.274718	0.0907463	0.732746	3638.57	-0.0497205	0.700306	0.856313	58.1548	-0.703112	0.146405	0.440244	TRUE	0.04048	0.6526	0.9999	TRUE	0.2091	0.02323	0.07259
ENSMUSG00000076441	Ass1	none	50.8083	0.533725	0.160233	NA	24.5263	0.215056	0.609654	0.917849	19.5811	0.195085	0.631535	0.991361	29.7334	0.440198	0.194826	0.426913	18.7853	2.44301	0.00349009	0.0332665	TRUE	-0.07665	0.5604	0.9999	TRUE	0.5436	1.274e-06	1.243e-05
ENSMUSG00000032567	Aste1	none	14.8749	-0.646065	0.345113	NA	20.322	0.483454	0.280729	0.746474	9.5691	0.247938	0.679561	0.991399	24.3978	0.257684	0.500651	0.726572	9.0093	0.333069	0.743847	0.914495	TRUE	-0.01999	0.93	0.9999	TRUE	0.1279	0.5074	0.6846
ENSMUSG00000026587	Astn1	none	3437.42	0.0339051	0.745161	0.927672	3050.51	-0.325807	0.000455182	0.0202921	1547.41	-0.278154	0.062871	0.662929	4142.88	-0.0696605	0.642066	0.823231	148.045	-1.5914	8.14866e-05	0.00153677	TRUE	-0.01951	0.8518	0.9999	TRUE	-0.3326	0.00236	0.01099
ENSMUSG00000028373	Astn2	none	478.239	-0.2765	0.0682111	0.364952	355.837	-0.518079	0.00042561	0.0192914	1682.18	-0.331336	0.0155908	0.418433	627.151	-0.139369	0.351239	0.599723	51.0464	-2.20278	0.000191103	0.00314174	TRUE	-0.1304	0.3258	0.9999	TRUE	-0.6055	3.628e-08	4.422e-07
ENSMUSG00000042548	Asxl1	none	385.016	-0.262608	0.10939	0.453405	363.578	-0.217179	0.0963679	0.504325	240.428	-0.221401	0.16144	0.844214	124.881	-0.504409	0.02258	0.101464	99.4789	-0.226487	0.51767	0.803608	TRUE	-0.02566	0.7785	0.9999	TRUE	-0.09648	0.269	0.4521
ENSMUSG00000037486	Asxl2	none	140.543	-0.324165	0.177479	0.554924	154.764	0.400109	0.026008	0.263528	168.401	-0.330161	0.0551638	0.632818	112.219	-0.394149	0.0499195	0.177497	95.1302	0.484796	0.206715	0.530645	TRUE	0.0212	0.8532	0.9999	TRUE	0.267	0.02943	0.08759
ENSMUSG00000045215	Asxl3	none	48.3077	-0.645738	0.108061	NA	42.7496	-0.165111	0.61417	0.917849	35.6531	-0.0353426	0.912471	0.994132	22.9633	-0.180938	0.671319	0.839869	NA	NA	NA	NA	TRUE	0.1248	0.4447	0.9999	TRUE	-0.4996	0.007451	0.02898
ENSMUSG00000013662	Atad1	none	1118.94	-0.2558	0.045461	0.30411	1570.68	0.0282695	0.804852	0.967888	1245.26	0.0491614	0.723696	0.993823	1890.15	-0.0177095	0.899445	0.960183	309.23	0.210664	0.404302	0.723112	TRUE	-0.05933	0.5327	0.9999	TRUE	-0.001237	0.9891	0.9949
ENSMUSG00000022360	Atad2	none	113.883	-0.191429	0.469275	0.79312	85.537	0.128131	0.609762	0.917849	54.0331	-0.0732838	0.780576	0.994132	16.0617	0.493398	0.270514	0.518071	41.2643	1.34645	0.0132358	0.0880343	TRUE	0.02956	0.8629	0.9999	TRUE	-0.2387	0.1401	0.2847
ENSMUSG00000052812	Atad2b	none	34.3192	-0.491701	0.278942	NA	52.0764	0.161534	0.58754	0.909308	36.632	-0.0560611	0.854707	0.994132	26.692	-0.479459	0.187801	0.417896	44.6097	0.438967	0.383044	0.706844	TRUE	0.1042	0.4122	0.9999	TRUE	-0.0394	0.7556	0.8618
ENSMUSG00000029036	Atad3a	none	99.6025	0.295156	0.284939	0.671479	93.371	0.149642	0.494261	0.875173	87.4282	0.0541655	0.827432	0.994132	74.023	0.262809	0.263992	0.511156	22.7896	0.848011	0.212729	0.53639	TRUE	-0.1589	0.1446	0.9492	TRUE	0.03768	0.7022	0.8285
ENSMUSG00000017550	Atad5	none	25.9871	0.0706612	0.8907	NA	44.3511	0.142886	0.658196	0.932179	20.1475	-0.183402	0.647033	0.991361	16.541	-0.156963	0.721789	0.86919	10.5141	0.417344	0.680351	0.8897	TRUE	-0.2506	0.2293	0.9954	TRUE	0.3318	0.0637	0.1588
ENSMUSG00000024426	Atat1	none	212.516	-0.0719588	0.719278	0.918132	162.095	-0.137742	0.424546	0.842945	118.499	0.142924	0.464762	0.970586	147.952	0.391875	0.0429591	0.160233	16.902	-0.723242	0.32932	0.661692	TRUE	0.03226	0.7431	0.9999	TRUE	0.06585	0.5172	0.6917
ENSMUSG00000034958	Atcay	none	1235.16	0.0577544	0.626061	0.874715	837.641	-0.243033	0.0396939	0.329253	463.405	0.0804237	0.556454	0.980439	241.444	-0.152477	0.39725	0.641169	27.0522	-1.79076	0.00429654	0.0388842	TRUE	-0.02285	0.8322	0.9999	TRUE	-0.4708	7.723e-07	7.801e-06
ENSMUSG00000030850	Ate1	none	468.534	-0.0428395	0.786998	0.942247	714.133	0.131477	0.302758	0.759062	354.692	0.0815203	0.575526	0.983338	185.258	-0.269061	0.126706	0.328107	94.7468	0.0599886	0.868508	0.963043	TRUE	0.06235	0.48	0.9999	TRUE	-0.1188	0.1689	0.3259
ENSMUSG00000023027	Atf1	none	16.8589	-0.343358	0.620915	NA	16.0271	-0.906655	0.0960044	0.503883	10.2182	-0.751595	0.191701	0.871485	31.4841	-0.313303	0.342216	0.591829	49.0603	0.116044	0.802339	0.93673	TRUE	-0.1844	0.2796	0.9999	TRUE	0.3045	0.04306	0.1184
ENSMUSG00000027104	Atf2	none	886.646	-0.313221	0.0187801	0.184614	780.772	-0.0473457	0.666177	0.9346	574.751	-0.202541	0.147441	0.827883	582.289	-0.295356	0.0416911	0.157195	146.049	0.0730873	0.813017	0.941659	TRUE	-0.03166	0.7169	0.9999	TRUE	-0.2279	0.01308	0.04571
ENSMUSG00000042406	Atf4	none	225.107	-0.650887	0.000935773	0.0307043	200.791	-0.432694	0.0184666	0.218501	260.844	-0.0698491	0.642791	0.991361	239.669	-0.185593	0.256974	0.503784	160.898	1.53271	1.2869e-06	4.06857e-05	TRUE	0.03694	0.7106	0.9999	TRUE	-0.3	0.001168	0.005971
ENSMUSG00000038539	Atf5	none	7.02941	0.81781	0.424359	NA	NA	NA	NA	NA	9.38935	0.0864082	0.881263	0.994132	39.2917	0.141759	0.668212	0.838235	5.84986	0.0524098	0.966306	0.991356	TRUE	-0.01772	0.9106	0.9999	TRUE	0.2793	0.03581	0.1026
ENSMUSG00000026663	Atf6	none	585.262	-0.0936046	0.523507	0.825438	580.673	0.313296	0.0108058	0.161238	378.84	-0.0281123	0.842451	0.994132	232.298	0.0847226	0.619798	0.809019	228.285	0.544993	0.0525517	0.227934	TRUE	0.02337	0.8074	0.9999	TRUE	-0.04725	0.6798	0.8131
ENSMUSG00000015461	Atf6b	none	189.175	0.259894	0.224354	0.613905	200.492	-0.0194202	0.905489	0.983017	145.591	0.00969551	0.959512	0.996915	164.386	-0.292703	0.159329	0.378719	113.595	0.0599096	0.858843	0.960332	TRUE	-0.04526	0.752	0.9999	TRUE	-0.1494	0.2606	0.4426
ENSMUSG00000099083	Atf7	none	11.8314	0.142314	0.853774	NA	15.2347	-1.23528	0.0184689	0.218501	23.5863	-0.340101	0.391855	0.957654	41.1356	0.00771182	0.97979	0.990956	26.0102	0.543416	0.380041	0.704878	TRUE	-0.188	0.308	0.9999	TRUE	-0.04725	0.7215	0.8414
ENSMUSG00000030213	Atf7ip	none	643.054	-0.0312008	0.831107	0.954345	661.472	0.0542225	0.678745	0.935363	872.632	-0.334305	0.0406404	0.567162	723.907	-0.0868919	0.570619	0.775881	431.013	-0.376215	0.11463	0.38026	TRUE	-0.09509	0.3187	0.9999	TRUE	-0.006343	0.945	0.9734
ENSMUSG00000021619	Atg10	none	67.326	0.0641646	0.84501	NA	87.9643	-0.0725082	0.747555	0.953307	60.5059	0.170867	0.498713	0.977337	80.3086	0.39002	0.093883	0.270872	40.1853	0.797626	0.122799	0.393773	TRUE	0.00481	0.9827	0.9999	TRUE	0.1146	0.502	0.6802
ENSMUSG00000037204	Atg101	none	133.116	0.120064	0.625296	0.874258	164.604	-0.250811	0.191774	0.661201	38.395	-0.055914	0.852285	0.994132	39.4995	-0.252487	0.440846	0.680271	26.1614	-0.554463	0.37375	0.700411	NA	NA	NA	NA	NA	NA	NA	NA
ENSMUSG00000032905	Atg12	none	203.298	-0.493305	0.0165284	0.174919	204.852	-0.118074	0.497887	0.876296	164.743	-0.233601	0.18546	0.867516	267.095	-0.247237	0.117471	0.313285	90.3357	0.502037	0.181748	0.496621	TRUE	0.2194	0.01951	0.492	TRUE	-0.2215	0.01807	0.05938
ENSMUSG00000027244	Atg13	none	417.626	0.0767441	0.630708	0.877764	357.643	-0.112076	0.450067	0.856321	225.556	0.112723	0.499235	0.977337	144.303	-0.0293224	0.88453	0.953341	49.1015	-0.102759	0.8353	0.951771	TRUE	-0.02014	0.8191	0.9999	TRUE	-0.09856	0.2589	0.4407
ENSMUSG00000037526	Atg14	none	120.029	0.392516	0.132745	0.492943	118.72	0.0846819	0.695486	0.941077	41.7426	-0.0473791	0.872971	0.994132	47.1742	-0.0729998	0.789991	0.906658	30.9231	0.169084	0.771658	0.926459	TRUE	0.01172	0.9261	0.9999	TRUE	0.03702	0.748	0.8577
ENSMUSG00000026289	Atg16l1	none	382.371	-0.0449818	0.780204	0.941264	375.115	0.0754619	0.566582	0.902987	138.348	-0.184116	0.328162	0.945883	87.4414	-0.2938	0.20536	0.439827	64.0436	-0.0505677	0.903862	0.976648	TRUE	-0.06789	0.468	0.9999	TRUE	-0.1318	0.1643	0.3194
ENSMUSG00000047767	Atg16l2	none	20.1145	0.0314981	0.957484	NA	8.4003	-0.820746	0.259986	NA	6.90421	0.0257583	0.969169	0.997323	13.3791	0.0912337	0.848715	0.935587	12.2598	0.921663	0.304369	0.639262	TRUE	-0.08223	0.6016	0.9999	TRUE	-0.1179	0.4356	0.6213
ENSMUSG00000024773	Atg2a	none	153.979	0.213147	0.352188	0.717984	105.296	0.244534	0.260389	0.726635	91.8804	0.175428	0.418272	0.959289	59.7393	-0.0830767	0.748218	0.885537	33.9565	-0.792021	0.183393	0.499169	TRUE	-0.1192	0.2745	0.9999	TRUE	-0.02042	0.8605	0.927
ENSMUSG00000041341	Atg2b	none	674.051	0.0765589	0.591216	0.857652	658.561	0.17104	0.131354	0.570629	618.365	0.0328836	0.791343	0.994132	213.051	-0.0938651	0.588526	0.788384	80.7405	-0.782936	0.0570686	0.241634	TRUE	0.06523	0.4872	0.9999	TRUE	-0.1095	0.2716	0.4553
ENSMUSG00000022663	Atg3	none	408.955	-0.282299	0.0987619	0.42945	494.979	-0.0990217	0.504268	0.878981	318.431	0.0572716	0.704372	0.992723	412.424	0.0203832	0.907072	0.964139	134.16	0.317025	0.402485	0.721943	TRUE	-0.05292	0.6312	0.9999	TRUE	-0.09565	0.3887	0.5773
ENSMUSG00000026280	Atg4b	none	269.656	0.0898172	0.634431	0.87925	281.117	-0.166122	0.282862	0.747413	188.682	-0.0198334	0.906202	0.994132	155.147	0.0261923	0.895266	0.958729	59.1594	0.207352	0.635497	0.865327	TRUE	0.1154	0.2135	0.9954	TRUE	-0.1825	0.04257	0.1174
ENSMUSG00000028550	Atg4c	none	247.941	0.0730305	0.703456	0.912184	266.572	0.125222	0.384002	0.819724	138.149	0.0603209	0.767082	0.994132	121.567	-0.124707	0.561343	0.769516	47.8922	0.176404	0.719273	0.906691	TRUE	-0.005776	0.9541	0.9999	TRUE	-0.08526	0.4174	0.6048
ENSMUSG00000002820	Atg4d	none	32.5884	0.90539	0.0562957	NA	18.2896	0.181492	0.699078	0.941813	26.4333	0.29115	0.415225	0.958938	15.01	-0.665196	0.148772	0.36293	7.04682	-0.468483	0.684235	0.892038	TRUE	-0.02035	0.8903	0.9999	TRUE	-0.2352	0.06596	0.1631
ENSMUSG00000038160	Atg5	none	278.54	-0.0413884	0.83753	0.957127	249.417	-0.149949	0.334408	0.78339	149.655	0.307969	0.0850159	0.722692	195.89	-0.180591	0.291475	0.542874	172.789	1.07441	0.000579958	0.00796908	TRUE	0.06738	0.608	0.9999	TRUE	0.06559	0.5824	0.7438
ENSMUSG00000030314	Atg7	none	184.506	0.147102	0.500961	0.809854	146.985	0.073895	0.683898	0.936515	93.3227	0.287724	0.174258	0.85529	110.172	0.152486	0.472045	0.707104	69.5446	0.574954	0.168183	0.475692	TRUE	0.02283	0.8715	0.9999	TRUE	0.01818	0.879	0.9369
ENSMUSG00000033124	Atg9a	none	718.621	0.0809096	0.545215	0.833343	491.759	-0.188248	0.161786	0.61821	382.039	-0.0154657	0.910259	0.994132	457.91	-0.50481	0.000700401	0.00643845	32.9728	-0.538042	0.329725	0.66206	TRUE	0.01706	0.8797	0.9999	TRUE	-0.2413	0.01268	0.04461
ENSMUSG00000038295	Atg9b	none	13.6204	-0.332211	0.640399	NA	4.63363	0.0613782	0.945538	NA	5.67248	-0.206811	0.780761	0.994132	9.69655	-0.269241	0.636261	0.820337	NA	NA	NA	NA	TRUE	-0.1079	0.6899	0.9999	TRUE	-0.1296	0.5992	0.7561
ENSMUSG00000026192	Atic	none	245.17	-0.0609201	0.751578	0.930169	246.128	0.0164549	0.920801	0.984722	141.978	0.491697	0.00656568	0.298449	150.284	-0.102261	0.598882	0.794976	96.2233	0.25165	0.484089	0.783416	TRUE	-0.1478	0.2149	0.9954	TRUE	0.2089	0.0598	0.1515
ENSMUSG00000021066	Atl1	none	1676.64	-0.0177841	0.884034	0.971074	1807.82	0.0705168	0.466996	0.862086	477.333	0.0216181	0.870096	0.994132	267.047	-0.230934	0.268924	0.515878	66.8355	-1.86001	1.76493e-05	0.000402992	TRUE	-0.06256	0.4846	0.9999	TRUE	-0.1889	0.02927	0.08721
ENSMUSG00000059811	Atl2	none	567.258	-0.106293	0.458041	0.786847	545.256	0.167589	0.176485	0.639297	1412.27	-0.100957	0.425031	0.962425	480.718	-0.14199	0.334356	0.584029	85.2529	-0.0769358	0.850641	0.957212	TRUE	-0.07297	0.5008	0.9999	TRUE	-0.0794	0.4476	0.632
ENSMUSG00000024759	Atl3	none	170.963	-0.187228	0.392988	0.746366	199.079	0.186318	0.260162	0.726189	57.6111	-0.0716298	0.779022	0.994132	233.111	0.561772	0.000657262	0.00610579	215.832	0.598597	0.0338573	0.170644	TRUE	-0.02022	0.849	0.9999	TRUE	0.252	0.01407	0.04847
ENSMUSG00000034218	Atm	none	201.912	-0.11596	0.58356	0.854237	317.313	0.0744778	0.620284	0.920699	122.329	0.0698793	0.708836	0.992723	223.85	-0.391996	0.0226066	0.101552	85.1354	-0.0355474	0.926812	0.982751	TRUE	-0.03773	0.7549	0.9999	TRUE	-0.04581	0.6655	0.8028
ENSMUSG00000047388	Atmin	none	373.415	-0.245666	0.164196	0.534596	230.027	-0.219607	0.161446	0.61821	200.232	-0.0996036	0.56768	0.982927	139.227	-0.341851	0.0910178	0.265178	48.806	-0.153336	0.746665	0.916529	TRUE	-0.06804	0.4772	0.9999	TRUE	-0.1833	0.04133	0.1148
ENSMUSG00000018585	Atox1	none	232.891	0.237174	0.230689	0.620757	270.093	-0.214871	0.136943	0.578446	276.232	-0.0565329	0.705744	0.992723	465.824	0.535622	0.000138141	0.00161913	659.686	1.16831	5.79566e-06	0.000150498	TRUE	0.07062	0.6663	0.9999	TRUE	0.2515	0.06208	0.1558
ENSMUSG00000025324	Atp10a	none	NA	NA	NA	NA	NA	NA	NA	NA	NA	NA	NA	NA	4.78425	-0.393153	0.637105	0.820634	NA	NA	NA	NA	TRUE	-0.05011	0.7953	0.9999	TRUE	0.6922	6.436e-05	0.0004625
ENSMUSG00000055415	Atp10b	none	NA	NA	NA	NA	4.51373	0.589153	0.546753	NA	NA	NA	NA	NA	NA	NA	NA	NA	NA	NA	NA	NA	TRUE	0.4431	0.1086	0.9015	TRUE	-0.5985	0.04056	0.1133
ENSMUSG00000046808	Atp10d	none	NA	NA	NA	NA	NA	NA	NA	NA	NA	NA	NA	NA	NA	NA	NA	NA	NA	NA	NA	NA	TRUE	0.06427	0.8035	0.9999	TRUE	0.6467	0.00253	0.01166
ENSMUSG00000031441	Atp11a	none	64.3025	-0.00275333	0.993475	NA	66.1031	0.193504	0.475102	0.866811	96.4094	0.0948908	0.650721	0.991361	215.259	1.15092	9.59579e-09	2.86589e-07	47.9522	-0.297099	0.538838	0.817516	TRUE	0.1826	0.162	0.9707	TRUE	0.5202	4.201e-08	5.076e-07
ENSMUSG00000037400	Atp11b	none	172.889	-0.261629	0.23107	0.620935	188.561	-0.269369	0.11873	0.548956	166.067	-0.271048	0.157898	0.839824	233.8	-0.279423	0.138731	0.346974	95.1659	-0.104328	0.779112	0.928557	TRUE	-0.2851	0.001937	0.1492	TRUE	0.4195	0.001046	0.005436
ENSMUSG00000062949	Atp11c	none	36.3313	-0.456461	0.30059	NA	73.4191	0.0704993	0.771089	0.959036	109.146	-0.296152	0.151655	0.834673	84.024	-0.099126	0.669083	0.838689	131.305	0.560415	0.0948018	0.338575	TRUE	0.3242	0.1113	0.903	TRUE	0.3515	0.01153	0.04146
ENSMUSG00000022229	Atp12a	none	NA	NA	NA	NA	NA	NA	NA	NA	NA	NA	NA	NA	NA	NA	NA	NA	NA	NA	NA	NA	NA	NA	NA	NA	NA	NA	NA	NA
ENSMUSG00000031862	Atp13a1	none	276.506	0.0790635	0.663271	0.895445	263.747	-0.0634771	0.681103	0.935461	136.524	0.0776906	0.690676	0.992048	272.367	-0.176213	0.384969	0.630327	100.237	0.372905	0.293332	0.626675	TRUE	-0.1409	0.1977	0.9879	TRUE	0.04815	0.5804	0.7426
ENSMUSG00000036622	Atp13a2	none	294.98	-0.121617	0.492616	0.805384	266.544	-0.235191	0.123454	0.557938	253.487	0.042608	0.79482	0.994132	125.234	-0.140313	0.48477	0.715305	135.82	1.49107	8.1301e-06	0.000201461	TRUE	-0.1544	0.3086	0.9999	TRUE	0.1289	0.4135	0.6012
ENSMUSG00000022533	Atp13a3	none	338.445	-0.290716	0.0979412	0.427754	545.412	-0.0792765	0.516481	0.881738	562.075	-0.394113	0.0285483	0.502369	511.294	0.0874478	0.563136	0.770882	275.616	0.0589149	0.829128	0.948837	TRUE	0.05815	0.558	0.9999	TRUE	0.1029	0.291	0.4768
ENSMUSG00000038094	Atp13a4	none	8.24419	1.44399	0.129274	NA	NA	NA	NA	NA	6.88872	1.11236	0.113122	0.777081	735.219	0.335206	0.0521906	0.182795	6.29867	-0.298096	0.801715	0.936718	TRUE	0.09225	0.5251	0.9999	TRUE	1.085	1.597e-20	5.221e-19
ENSMUSG00000048939	Atp13a5	none	10.0729	0.000700914	0.999348	NA	NA	NA	NA	NA	NA	NA	NA	NA	12.3236	0.859757	0.105601	0.292391	NA	NA	NA	NA	TRUE	-0.2836	0.05106	0.7297	TRUE	0.1237	0.3547	0.5447
ENSMUSG00000033161	Atp1a1	none	18233.5	-0.091843	0.376695	0.733623	8805.59	-0.114343	0.217704	0.685639	4883.1	-0.168344	0.167881	0.846891	6589.22	-0.208332	0.183133	0.4112	1503.05	0.244352	0.282787	0.615512	TRUE	-0.1598	0.2142	0.9954	TRUE	-0.1066	0.435	0.6209
ENSMUSG00000007097	Atp1a2	none	1174.21	0.627363	5.23489e-07	0.000129994	288.872	0.665401	0.256853	0.724255	423.046	0.155508	0.410074	0.958839	79075.3	-0.433644	0.00598155	0.0376345	516.115	-0.955336	0.00431446	0.0389156	TRUE	-0.02812	0.8468	0.9999	TRUE	0.6913	9.22e-06	7.773e-05
ENSMUSG00000040907	Atp1a3	none	30822.7	-0.05676	0.593397	0.858308	35737.5	-0.323384	0.000284667	0.0142111	51540.8	-0.144308	0.180928	0.862779	11992	-0.415628	0.0202305	0.0938002	1754.48	-0.41925	0.161218	0.46437	TRUE	-0.08844	0.6213	0.9999	TRUE	-0.3238	0.07133	0.1725
ENSMUSG00000026576	Atp1b1	none	22312.2	-0.103903	0.336382	0.706598	28299.2	-0.00272249	0.974201	0.994613	40665.9	-0.224844	0.0492803	0.603069	10916.5	-0.112749	0.507576	0.730386	754.693	-0.779858	0.0105629	0.0747623	TRUE	-0.03488	0.8167	0.9999	TRUE	-0.3318	0.02562	0.07886
ENSMUSG00000041329	Atp1b2	none	2024.27	0.17305	0.111376	0.459004	1661.49	-0.316104	0.000905595	0.032117	2723.72	-0.440247	0.0013336	0.142978	46733	-0.0728351	0.557337	0.766399	265.45	0.0587385	0.836052	0.95201	TRUE	-0.04594	0.6923	0.9999	TRUE	1.117	7.1e-16	1.717e-14
ENSMUSG00000032412	Atp1b3	none	237.304	-0.208045	0.298077	0.681541	240.592	0.364674	0.0218778	0.239881	240.679	-0.281865	0.100259	0.755542	1174	0.205564	0.15196	0.368693	742.056	1.01591	8.16057e-06	0.000201796	TRUE	0.08071	0.4226	0.9999	TRUE	0.2671	0.002725	0.01241
ENSMUSG00000025436	Atp23	none	26.8039	-0.393528	0.437591	NA	25.0299	0.102041	0.806478	0.967964	28.5692	-0.221088	0.52952	0.979024	22.8022	-0.111235	0.769314	0.89655	4.32884	3.42636	0.0730956	0.285835	NA	NA	NA	NA	NA	NA	NA	NA
ENSMUSG00000029467	Atp2a2	none	10904.1	-0.371727	0.000301801	0.0141649	10080.6	-0.255084	0.00869165	0.142016	17272.4	-0.194838	0.0642976	0.665047	7143.23	-0.374131	0.00632303	0.0391771	885.987	-0.876322	0.000805265	0.010365	TRUE	0.07117	0.6043	0.9999	TRUE	-0.3591	0.009869	0.03641
ENSMUSG00000020788	Atp2a3	none	4.6666	-0.0510481	0.967363	NA	NA	NA	NA	NA	1200.92	-0.0727445	0.609551	0.989253	15.9366	-0.990623	0.0300256	0.124846	27.1449	-1.08289	0.134761	0.4172	TRUE	0.1284	0.4481	0.9999	TRUE	-0.464	0.01436	0.0493
ENSMUSG00000019943	Atp2b1	none	7966.4	-0.33113	0.00153023	0.0427298	19273.1	-0.124099	0.29996	0.759062	1976.44	-0.176515	0.205704	0.88643	3345.1	-0.328585	0.0522979	0.182913	883.714	0.393021	0.0979791	0.344748	TRUE	-0.1121	0.4352	0.9999	TRUE	-0.3721	0.01108	0.04013
ENSMUSG00000030302	Atp2b2	none	7631.51	-0.0959096	0.331269	0.703118	4255.3	-0.19057	0.0327002	0.295941	8513.67	-0.334947	0.00682139	0.304543	1682.16	-0.669596	6.47043e-05	0.000856087	314.77	-1.98804	0.00593191	0.049133	TRUE	-0.1908	0.1482	0.9501	TRUE	-0.4435	0.000527	0.002976
ENSMUSG00000031376	Atp2b3	none	1616.64	-0.0537988	0.632783	0.878299	2887.18	-0.190739	0.0661109	0.427489	2327.11	-0.0311186	0.775383	0.994132	528.858	-0.373114	0.038405	0.148997	96.3716	-1.71895	2.74455e-05	0.000594769	TRUE	0.0787	0.531	0.9999	TRUE	-0.5028	3.82e-06	3.474e-05
ENSMUSG00000026463	Atp2b4	none	3289.06	-0.161584	0.125467	0.482312	842.155	-0.634552	0.103799	0.518899	194.648	-0.0160371	0.921324	0.994789	2169.6	-0.107667	0.543499	0.756753	78.5512	-1.26428	0.00524018	0.0451284	TRUE	0.07296	0.5588	0.9999	TRUE	-0.1	0.6303	0.7782
ENSMUSG00000032570	Atp2c1	none	937.627	-0.3264	0.0107615	0.138285	1678.03	-0.139734	0.183728	0.649929	1108.69	-0.191327	0.145262	0.825377	1484.81	-0.521979	0.000208676	0.00230288	576.455	-0.033125	0.882661	0.969757	TRUE	-0.009559	0.9251	0.9999	TRUE	-0.3192	0.001946	0.009281
ENSMUSG00000025428	Atp5a1	none	8516.82	0.0727647	0.532202	0.828944	8888.92	0.0147656	0.879624	0.979541	8221.01	0.203513	0.103511	0.765531	3293.1	-0.374012	0.0107053	0.0586901	1026.05	-0.126395	0.550795	0.823593	TRUE	-0.05915	0.6425	0.9999	TRUE	-0.1089	0.3971	0.585
ENSMUSG00000025393	Atp5b	none	7876.4	0.10326	0.308177	0.688113	9359.27	0.0974048	0.263545	0.730362	8966.87	0.0135644	0.903521	0.994132	4226.81	-0.182704	0.174552	0.400049	1240	-0.161375	0.470142	0.774055	TRUE	-0.02048	0.8789	0.9999	TRUE	-0.2252	0.09048	0.2066
ENSMUSG00000025781	Atp5c1	none	1679.59	0.0630289	0.663784	0.895445	1832.69	0.0735693	0.493271	0.874565	1864.11	0.0446067	0.68277	0.991399	1406.17	-0.264003	0.0421317	0.158157	359.125	-0.0117736	0.961866	0.990623	TRUE	0.01794	0.8452	0.9999	TRUE	-0.0626	0.4934	0.6721
ENSMUSG00000003072	Atp5d	none	1306.19	0.243474	0.0379385	0.273354	1293.89	-0.207464	0.0390514	0.325669	1023.94	0.160057	0.285195	0.932376	831.696	-0.14964	0.328131	0.578093	204.451	0.194904	0.489011	0.787436	TRUE	-0.07158	0.5572	0.9999	TRUE	-0.1953	0.1449	0.2917
ENSMUSG00000016252	Atp5e	none	1152.03	0.26913	0.0502631	0.321023	1039.81	-0.233875	0.0745942	0.45609	1439.92	-0.197768	0.0923891	0.738681	2089.62	0.279965	0.0427194	0.159733	709.635	0.209647	0.364405	0.693824	TRUE	0.1018	0.3854	0.9999	TRUE	-0.1188	0.2889	0.4743
ENSMUSG00000006057	Atp5g1	none	14.5058	-0.085532	0.904431	NA	11.0746	0.5411	0.395099	NA	31.9972	-0.28799	0.447382	0.966257	11.8706	-0.192066	0.710309	0.86257	NA	NA	NA	NA	TRUE	0.05765	0.6038	0.9999	TRUE	-0.2143	0.02572	0.07902
ENSMUSG00000018770	Atp5g3	none	2771.14	-0.0185245	0.882703	0.970346	3148.71	0.139217	0.218511	0.687296	3417.18	0.0937104	0.381864	0.957654	2638.05	-0.169558	0.260726	0.507792	351.936	0.359434	0.142933	0.43327	TRUE	0.02333	0.7904	0.9999	TRUE	-0.1757	0.05835	0.1487
ENSMUSG00000034566	Atp5h	none	321.164	0.0930715	0.659308	0.893251	392.799	0.0464435	0.750235	0.953483	574.972	0.147284	0.296432	0.939043	382.34	0.005502	0.975272	0.990114	78.4283	0.115475	0.764026	0.922824	TRUE	-0.02085	0.8198	0.9999	TRUE	-0.2447	0.003841	0.01676
ENSMUSG00000022890	Atp5j	none	1142.2	-0.225106	0.509234	0.814545	1686.38	0.24424	0.0516102	0.375735	2111.6	0.0104495	0.933197	0.995591	2002.74	-0.0642806	0.681375	0.845338	367.778	0.465169	0.0619984	0.255695	TRUE	0.02513	0.7935	0.9999	TRUE	-0.1618	0.08525	0.1975
ENSMUSG00000038690	Atp5j2	none	899.79	0.399489	0.00334345	0.0717501	569.154	-0.295884	0.0416822	0.3352	984.77	-0.0871027	0.451432	0.967703	1117.82	0.102828	0.461451	0.697256	358.951	0.187583	0.443703	0.755823	TRUE	0.04214	0.6665	0.9999	TRUE	-0.2427	0.009209	0.03435
ENSMUSG00000050856	Atp5k	none	586.068	0.27085	0.0574357	0.340405	466.782	-0.187008	0.210339	0.679431	668.734	-0.0643081	0.600154	0.988481	814.983	0.121362	0.404292	0.647382	179.99	0.0186164	0.951922	0.987781	TRUE	0.06793	0.5548	0.9999	TRUE	-0.2747	0.008823	0.03325
ENSMUSG00000038717	Atp5l	none	NA	NA	NA	NA	NA	NA	NA	NA	6.41301	0.194602	0.802561	0.994132	4.39251	0.637536	0.447884	0.685425	NA	NA	NA	NA	TRUE	0.05433	0.6925	0.9999	TRUE	-0.1105	0.3565	0.5458
ENSMUSG00000071528	Atp5md	none	255.895	0.612137	0.149134	0.513289	186.123	-0.401014	0.0535729	0.383833	203.375	-0.195215	0.237034	0.908037	199.866	0.241519	0.226675	0.466562	54.8636	0.285755	0.52059	0.805584	NA	NA	NA	NA	NA	NA	NA	NA
ENSMUSG00000021290	Atp5mpl	none	1057.71	-0.0455785	0.71895	0.918132	1136.45	0.159726	0.14951	0.597468	1518.58	-0.0773584	0.54582	0.980148	1662.73	0.0372074	0.784992	0.9039	258.652	0.761864	0.0043196	0.0389156	NA	NA	NA	NA	NA	NA	NA	NA
ENSMUSG00000022956	Atp5o	none	1154.76	0.135126	0.278761	0.666747	1073.03	-0.242702	0.140803	0.584415	1471.62	-0.205208	0.0957267	0.749044	1222.73	-0.259245	0.0813553	0.24685	212.117	0.104356	0.720966	0.907029	TRUE	0.04997	0.565	0.9999	TRUE	-0.2253	0.006677	0.02656
ENSMUSG00000000563	Atp5pb	none	1026.36	0.125233	0.385871	0.741176	1190.06	-0.0307792	0.78254	0.961151	1054.08	-0.113343	0.333456	0.948922	831.62	-0.138889	0.348185	0.596936	215.535	-0.0358668	0.897089	0.974291	NA	NA	NA	NA	NA	NA	NA	NA
ENSMUSG00000019087	Atp6ap1	none	4828.93	0.130883	0.202203	0.586154	3888.1	-0.139108	0.236318	0.70641	3794.78	-0.083794	0.492293	0.975974	5293.95	-0.0733281	0.611379	0.803187	1868.53	0.569776	0.00432821	0.0389637	TRUE	-0.009707	0.9255	0.9999	TRUE	-0.05639	0.5916	0.7505
ENSMUSG00000078958	Atp6ap1l	none	104.386	-0.0572067	0.83213	0.954345	NA	NA	NA	NA	137.085	-0.356826	0.0632537	0.663493	37.4999	-0.255403	0.410548	0.653584	NA	NA	NA	NA	TRUE	-0.9569	0.01154	0.3908	TRUE	-0.4129	0.382	0.571
ENSMUSG00000031007	Atp6ap2	none	3845.05	-0.0395393	0.71681	0.918029	3380.68	0.0737793	0.436435	0.849577	3646.17	0.0192685	0.89891	0.994132	2960.15	-0.0736215	0.636684	0.820623	994.451	0.756778	0.000310612	0.00468039	TRUE	0.0521	0.5789	0.9999	TRUE	-0.09492	0.3231	0.5132
ENSMUSG00000019302	Atp6v0a1	none	4909.46	-0.000588491	0.995385	0.999806	4636.85	-0.0383624	0.684859	0.93687	2066.51	0.178011	0.110033	0.771034	1599.75	-0.167814	0.247476	0.492088	393.402	-0.229023	0.434536	0.749679	TRUE	0.01548	0.9036	0.9999	TRUE	-0.1531	0.2149	0.388
ENSMUSG00000038023	Atp6v0a2	none	151.637	0.0723663	0.753528	0.930975	128.091	0.110946	0.563158	0.901935	106.01	0.460026	0.0218455	0.45785	569.555	1.16879	1.05381e-10	4.10941e-09	132.148	-0.19106	0.560166	0.827459	TRUE	0.1755	0.08882	0.8582	TRUE	0.5943	8.205e-09	1.078e-07
ENSMUSG00000038600	Atp6v0a4	none	4.56972	0.172113	0.888305	NA	NA	NA	NA	NA	NA	NA	NA	NA	NA	NA	NA	NA	NA	NA	NA	NA	TRUE	-0.02829	0.9226	0.9999	TRUE	-0.2762	0.3173	0.5072
ENSMUSG00000033379	Atp6v0b	none	1238.11	-0.17397	0.593668	0.858522	1154.52	-0.03931	0.749389	0.953483	1094.67	-0.0312761	0.830481	0.994132	1451.13	-0.147994	0.331072	0.580998	313.684	0.482019	0.0702032	0.277911	TRUE	-0.01341	0.8849	0.9999	TRUE	-0.1004	0.2898	0.4752
ENSMUSG00000024121	Atp6v0c	none	8.87664	1.16917	0.199624	NA	6.06098	0.333172	0.683506	NA	4.82816	-0.273558	0.735659	0.994132	5.50406	0.661242	0.384238	0.62949	NA	NA	NA	NA	TRUE	-0.1084	0.5036	0.9999	TRUE	0.1872	0.2916	0.4776
ENSMUSG00000013160	Atp6v0d1	none	3755.74	0.198815	0.109774	0.454067	3578.26	0.1954	0.0417105	0.3352	1423.19	0.247119	0.047228	0.596213	1310.21	0.151948	0.306411	0.557508	434.02	0.598066	0.0125515	0.0847598	TRUE	-0.01822	0.8598	0.9999	TRUE	-0.103	0.2738	0.4577
ENSMUSG00000015575	Atp6v0e	none	32.3345	0.370531	0.449044	NA	27.1974	0.205099	0.598211	0.912606	26.5117	0.22123	0.533635	0.979472	471.509	0.500734	0.0105765	0.0582299	218.581	1.13233	9.97297e-05	0.00181478	TRUE	0.3487	0.03094	0.6026	TRUE	0.7467	2.148e-08	2.686e-07
ENSMUSG00000039347	Atp6v0e2	none	634.278	0.195236	0.186043	0.564633	586.898	0.121544	0.364622	0.807298	467.414	-0.0146139	0.911639	0.994132	445.979	0.265235	0.0906995	0.264737	17.7384	-0.0376238	0.960189	0.989894	TRUE	-0.05506	0.6109	0.9999	TRUE	-0.2998	0.00551	0.02264
ENSMUSG00000052459	Atp6v1a	none	5566.18	0.0821425	0.46585	0.7912	7868.43	0.385548	0.000202006	0.0109416	2645.93	0.297907	0.00744818	0.316154	1181.58	0.226751	0.116898	0.312224	540.993	0.218364	0.416072	0.735078	TRUE	0.01007	0.9337	0.9999	TRUE	0.02626	0.8338	0.9097
ENSMUSG00000006273	Atp6v1b2	none	7528.96	0.141874	0.169131	0.542171	6978	0.0731263	0.424174	0.84267	3656.3	0.216798	0.0480438	0.59843	1353.76	-0.243214	0.115553	0.309945	691.523	0.255962	0.289249	0.62219	TRUE	-0.01366	0.9117	0.9999	TRUE	-0.09227	0.4566	0.6409
ENSMUSG00000022295	Atp6v1c1	none	3507.47	0.131038	0.227827	0.617336	3663.61	-0.0145022	0.898758	0.982047	2167.71	-0.0109349	0.924966	0.994877	1180.39	-0.127307	0.370015	0.616446	768.14	1.01818	8.52741e-06	0.000209132	TRUE	0.005248	0.9544	0.9999	TRUE	-0.1141	0.2305	0.4077
ENSMUSG00000020566	Atp6v1c2	none	7.67064	0.366064	0.696068	NA	NA	NA	NA	NA	NA	NA	NA	NA	5.01489	0.878193	0.292733	0.544103	NA	NA	NA	NA	TRUE	-0.2718	0.499	0.9999	TRUE	-0.6192	0.1333	0.2746
ENSMUSG00000021114	Atp6v1d	none	3019.92	-0.0907573	0.445686	0.779222	2769.88	-0.0543978	0.568147	0.903483	1342.33	0.00683249	0.956254	0.995891	829.744	-0.105185	0.523796	0.742558	277.016	0.522347	0.0462445	0.208942	TRUE	0.008367	0.9238	0.9999	TRUE	-0.2251	0.0153	0.05191
ENSMUSG00000019210	Atp6v1e1	none	5553.65	-0.000523314	0.996053	0.999806	5964.88	0.196176	0.0479755	0.36189	3718.7	0.118323	0.329004	0.9471	1875.53	-0.049445	0.769158	0.89655	431.621	0.576069	0.0181799	0.109937	TRUE	-0.04082	0.6849	0.9999	TRUE	-0.1237	0.2102	0.3825
ENSMUSG00000004285	Atp6v1f	none	550	-0.59709	0.000494301	0.0204302	654.229	0.0629303	0.649068	0.92911	352.482	0.0396857	0.808397	0.994132	671.707	0.293152	0.027125	0.115727	270.632	0.739785	0.0090449	0.0668331	TRUE	0.001449	0.9897	0.9999	TRUE	0.0242	0.8339	0.9098
ENSMUSG00000039105	Atp6v1g1	none	98.7942	0.345091	0.225297	0.615033	34.9691	0.135845	0.703969	0.942708	75.4526	-0.0395739	0.860078	0.994132	80.0083	0.820539	0.000534372	0.00512337	112.35	0.454688	0.243045	0.572515	TRUE	0.02462	0.816	0.9999	TRUE	0.3306	0.003851	0.0168
ENSMUSG00000024403	Atp6v1g2	none	1520.2	0.245326	0.0371008	0.270968	968.676	-0.189828	0.158052	0.612498	1133.33	0.0231935	0.855783	0.994132	488.299	-0.0986848	0.589864	0.789065	42.2613	-0.307011	0.538716	0.817516	TRUE	-0.07094	0.5468	0.9999	TRUE	-0.3493	0.002628	0.01205
ENSMUSG00000033793	Atp6v1h	none	3728.37	-0.138221	0.252571	0.642093	4179.56	0.198639	0.0980726	0.508092	2725.79	0.222074	0.0829737	0.716455	1129.43	-0.0354518	0.823074	0.923157	293.532	0.12831	0.647529	0.872119	TRUE	0.02479	0.7695	0.9999	TRUE	-0.1285	0.152	0.3021
ENSMUSG00000033792	Atp7a	none	67.1882	-0.151648	0.652805	NA	76.7753	-0.0696124	0.770979	0.959036	75.3928	-0.176798	0.484138	0.973802	128.595	0.17207	0.380757	0.626291	335.359	1.07034	2.68777e-05	0.000583526	TRUE	0.6003	0.01094	0.3825	TRUE	0.5337	0.0001513	0.0009878
ENSMUSG00000006567	Atp7b	none	6.18349	-1.06842	0.315937	NA	3.8551	1.06342	0.305401	NA	10.7813	0.604185	0.264227	0.920672	56.448	0.392751	0.153934	0.371336	NA	NA	NA	NA	TRUE	-0.08484	0.7474	0.9999	TRUE	0.9737	3.932e-05	0.0002948
ENSMUSG00000037685	Atp8a1	none	2931.54	-0.0807909	0.463563	0.790351	3287.4	0.0174272	0.868369	0.9775	772.857	-0.1438	0.253851	0.916617	1981.34	-0.19023	0.229219	0.469983	694.458	0.0132207	0.951998	0.987781	TRUE	0.02241	0.8236	0.9999	TRUE	-0.02523	0.8155	0.8987
ENSMUSG00000021983	Atp8a2	none	440.045	-0.153006	0.326282	0.698422	239.473	-0.412658	0.0141635	0.187161	721.34	-0.0820789	0.503465	0.977337	163.732	-0.341388	0.144473	0.356061	280.674	-0.707667	0.00577617	0.0482116	TRUE	0.06636	0.7319	0.9999	TRUE	-0.1328	0.4505	0.6351
ENSMUSG00000039529	Atp8b1	none	12.7267	-0.886149	0.247245	NA	NA	NA	NA	NA	NA	NA	NA	NA	5.80263	0.0866096	0.909914	0.965808	17.731	2.17901	0.0116516	0.0801827	TRUE	-0.1347	0.6419	0.9999	TRUE	0.6091	0.02161	0.06859
ENSMUSG00000060671	Atp8b2	none	82.6477	0.723799	0.0196578	NA	63.1296	0.64913	0.0176311	0.212639	68.5388	0.385399	0.104427	0.768143	45.6719	0.127266	0.661018	0.833851	15.1114	-1.59239	0.0449732	0.205646	TRUE	-0.1611	0.1171	0.9172	TRUE	-0.009129	0.9224	0.9614
ENSMUSG00000027546	Atp9a	none	1912.62	0.0496097	0.654769	0.890399	1652.91	-0.154003	0.107294	0.527617	673.567	0.0135896	0.916337	0.994132	696.618	0.192852	0.272701	0.520396	86.0293	-1.86248	8.45622e-06	0.000207814	TRUE	-0.098	0.4327	0.9999	TRUE	-0.2667	0.03004	0.08893
ENSMUSG00000024566	Atp9b	none	305.634	0.0121362	0.9445	0.987239	349.291	-0.384904	0.00494519	0.0984765	173.708	0.00766393	0.96508	0.997183	212.527	0.103282	0.608383	0.801076	95.2204	0.0663285	0.860861	0.960332	TRUE	-0.004634	0.9589	0.9999	TRUE	-0.103	0.2263	0.4027
ENSMUSG00000028710	Atpaf1	none	6.50418	0.644034	0.530206	NA	NA	NA	NA	NA	7.57889	0.0422379	0.949834	0.995591	NA	NA	NA	NA	NA	NA	NA	NA	TRUE	-0.1133	0.4399	0.9999	TRUE	-0.1723	0.1764	0.3365
ENSMUSG00000042709	Atpaf2	none	87.0508	0.129324	0.664727	NA	57.3008	0.185709	0.490318	0.874378	63.904	-0.262039	0.292543	0.937426	56.5717	0.643785	0.0151836	0.0755004	22.166	0.374966	0.571471	0.83164	TRUE	-0.06172	0.6413	0.9999	TRUE	-0.06528	0.5902	0.7494
ENSMUSG00000054428	Atpif1	none	1017.85	0.181784	0.148363	0.511689	588.053	-0.0929672	0.437872	0.851	807.405	-0.403132	0.00185048	0.173756	427.012	0.151704	0.293578	0.544655	219.632	0.529648	0.0632587	0.259367	TRUE	-0.03783	0.7246	0.9999	TRUE	-0.2385	0.02605	0.07983
ENSMUSG00000039065	Atpsckmt	none	22.6333	-0.288981	0.599752	NA	13.8878	-0.116018	0.828785	0.970437	23.2555	-0.00155742	0.996823	0.998648	35.4589	-0.170666	0.606495	0.80007	9.55416	-0.555132	0.565149	0.829348	NA	NA	NA	NA	NA	NA	NA	NA
ENSMUSG00000032409	Atr	none	94.3249	-0.215929	0.447702	NA	88.2053	0.0438387	0.846642	0.975088	145.514	-0.376549	0.0572209	0.641752	162.683	-0.508839	0.0098626	0.0552801	106.736	-0.130292	0.711681	0.903743	TRUE	0.07348	0.6264	0.9999	TRUE	0.3271	0.02086	0.06668
ENSMUSG00000013622	Atraid	none	264.027	0.185329	0.34045	0.710281	324.656	0.0121998	0.932051	0.988347	217.918	0.0806466	0.653159	0.991361	1050.47	0.0367376	0.784369	0.903619	351.664	0.568315	0.0528393	0.228766	NA	NA	NA	NA	NA	NA	NA	NA
ENSMUSG00000027312	Atrn	none	1595.88	-0.230275	0.0479154	0.312965	1886.25	-0.166297	0.131721	0.571253	1141.41	-0.476065	0.144146	0.825377	1512.8	-0.425332	0.0120609	0.0637475	180.364	-0.00728889	0.980344	0.993629	TRUE	-0.03165	0.7442	0.9999	TRUE	-0.2093	0.05041	0.1336
ENSMUSG00000054843	Atrnl1	none	940.53	-0.0489863	0.704078	0.912544	673.886	-0.0868594	0.460821	0.861572	1600.78	-0.370816	0.288581	0.935569	524.464	-0.308771	0.0775683	0.238656	63.954	-0.789321	0.0668178	0.270154	TRUE	0.03637	0.6754	0.9999	TRUE	-0.4875	4.009e-07	4.26e-06
ENSMUSG00000031229	Atrx	none	2362.85	-0.392466	0.000281935	0.0136131	3292.33	0.211298	0.0808229	0.473136	1232.2	-0.0512297	0.652679	0.991361	568.624	-0.572573	0.000116888	0.00139756	383.646	0.0321843	0.894286	0.97384	TRUE	-0.006806	0.9473	0.9999	TRUE	-0.004876	0.9611	0.982
ENSMUSG00000046876	Atxn1	none	416.766	-0.40478	0.0124559	0.150785	290.243	-0.264093	0.0855137	0.481187	130.612	-0.081602	0.669859	0.991361	178.152	-0.416014	0.0259135	0.112675	41.6283	-0.189108	0.715341	0.90511	TRUE	-0.07639	0.4229	0.9999	TRUE	-0.3107	0.001086	0.005607
ENSMUSG00000016541	Atxn10	none	2711.27	0.135224	0.266856	0.654636	4001.48	0.187395	0.0774785	0.463084	1717.1	0.261107	0.0442674	0.580072	1181.32	0.0303691	0.840544	0.93049	406.069	0.140122	0.572256	0.831999	TRUE	-0.07784	0.4248	0.9999	TRUE	-0.07573	0.4556	0.6398
ENSMUSG00000069895	Atxn1l	none	73.2368	0.0937035	0.767382	NA	59.348	0.137832	0.604348	0.915139	47.2043	-0.0918583	0.749268	0.994132	87.8532	0.549549	0.0187435	0.0885447	36.3298	0.38907	0.473299	0.775548	TRUE	-0.08682	0.36	0.9999	TRUE	0.05778	0.5295	0.7012
ENSMUSG00000042605	Atxn2	none	1094.83	-0.339713	0.00513723	0.0942457	1039.25	-0.0522521	0.658092	0.932179	833.76	-0.0140544	0.906749	0.994132	433.963	-0.609378	6.50764e-05	0.000858624	144.103	-0.281271	0.376398	0.702299	TRUE	0.09641	0.2867	0.9999	TRUE	-0.1479	0.08148	0.1913
ENSMUSG00000032637	Atxn2l	none	656.458	-0.0501013	0.714912	0.917236	591.743	-0.0328486	0.786303	0.962013	419.587	-0.0824385	0.580255	0.983491	255.683	-0.586538	0.000310534	0.00322943	207.188	-0.150717	0.596621	0.844293	TRUE	0.02023	0.8425	0.9999	TRUE	-0.05284	0.5812	0.7429
ENSMUSG00000021189	Atxn3	none	129.641	-0.278541	0.287388	0.673024	134.286	0.277747	0.140738	0.584369	52.1874	0.286635	0.313409	0.939405	60.0408	-0.0614789	0.81027	0.917331	63.4253	0.761334	0.0765596	0.293791	TRUE	-0.0695	0.5272	0.9999	TRUE	0.03355	0.7473	0.8574
ENSMUSG00000021738	Atxn7	none	25.8719	0.184892	0.735535	NA	29.4468	0.153771	0.678103	0.935363	18.0365	0.0968129	0.825071	0.994132	45.2725	-0.157364	0.591309	0.790107	22.7126	0.277937	0.676848	0.888703	TRUE	-0.009986	0.9244	0.9999	TRUE	-0.08356	0.479	0.66
ENSMUSG00000020564	Atxn7l1	none	160.455	0.00587766	0.979236	0.996434	165.869	0.114441	0.517501	0.881738	91.8088	-0.354783	0.0926182	0.739079	124.202	-0.402537	0.043728	0.162314	57.6198	0.297857	0.493889	0.790343	TRUE	0.1973	0.07342	0.8194	TRUE	-0.1592	0.1471	0.2948
ENSMUSG00000048997	Atxn7l2	none	43.3419	-0.136636	0.738567	NA	31.9762	0.365024	0.324044	0.774233	8.47715	-0.934651	0.128915	0.801624	10.5788	-0.0427719	0.936873	0.976683	NA	NA	NA	NA	TRUE	-0.1024	0.4352	0.9999	TRUE	-0.01785	0.8768	0.9357
ENSMUSG00000059995	Atxn7l3	none	177.663	0.38359	0.0797104	0.39279	128.524	-0.113201	0.577311	0.906641	83.5586	-0.0715289	0.768027	0.994132	73.6586	0.11497	0.629043	0.815864	23.8984	-0.351465	0.598699	0.845436	TRUE	-0.06671	0.5158	0.9999	TRUE	-0.3059	0.002464	0.0114
ENSMUSG00000074748	Atxn7l3b	none	494.845	0.149274	0.345068	0.71364	423.7	-0.207815	0.149268	0.597128	219.238	-0.119979	0.447827	0.966257	408.977	-0.187934	0.207298	0.442691	87.2947	0.0502332	0.897397	0.974305	TRUE	-0.04337	0.6443	0.9999	TRUE	-0.3127	0.0006299	0.003492
ENSMUSG00000078584	AU022252	none	53.6068	-0.130111	0.725033	NA	50.7423	0.189376	0.520421	0.882644	46.5444	-0.0279076	0.921537	0.994877	87.9979	-0.569128	0.00980853	0.0550852	14.9838	-0.25337	0.760266	0.922301	TRUE	0.01997	0.8979	0.9999	TRUE	-0.07872	0.5465	0.7151
ENSMUSG00000109890	AU023762	none	6.68885	-1.04183	0.301821	NA	NA	NA	NA	NA	NA	NA	NA	NA	NA	NA	NA	NA	NA	NA	NA	NA	TRUE	-1.309	0.003318	0.1952	TRUE	-0.01766	0.968	0.9852
ENSMUSG00000028830	AU040320	none	486.643	0.147464	0.332499	0.704251	405.132	0.00563727	0.967528	0.993322	455.23	-0.344476	0.0439302	0.579609	567.927	-0.140367	0.362995	0.609809	151.145	0.0448952	0.884492	0.97034	TRUE	-0.05055	0.5682	0.9999	TRUE	-0.006899	0.9425	0.9723
ENSMUSG00000078435	AU041133	none	32.4028	-0.685201	0.214275	NA	64.5184	-0.145675	0.636151	0.926634	24.9681	0.363982	0.349559	0.950882	14.5854	0.325741	0.492675	0.721304	8.45332	0.0341711	0.976314	0.992384	TRUE	-0.1996	0.4306	0.9999	TRUE	0.2516	0.2721	0.456
ENSMUSG00000021460	Auh	none	374.516	-0.144786	0.375752	0.733259	341.747	-0.205549	0.129197	0.567241	550.668	0.0609311	0.644909	0.991361	176.337	0.138781	0.468166	0.704047	48.2263	-0.2738	0.558173	0.826701	TRUE	0.03962	0.7051	0.9999	TRUE	-0.1125	0.2726	0.4564
ENSMUSG00000068328	Aup1	none	112.009	-0.063405	0.808908	0.948615	99.2973	-0.169132	0.450421	0.856494	70.0175	-0.146575	0.550723	0.980439	146.394	0.018401	0.9357	0.976038	134.17	0.0996312	0.759839	0.922165	TRUE	0.03722	0.7155	0.9999	TRUE	0.1231	0.2062	0.3772
ENSMUSG00000027496	Aurka	none	6.63002	-0.444253	0.666606	NA	10.4411	0.778746	0.221212	NA	8.67988	0.388128	0.55315	0.980439	NA	NA	NA	NA	NA	NA	NA	NA	TRUE	-0.2203	0.5648	0.9999	TRUE	0.5281	0.08849	0.2032
ENSMUSG00000065990	Aurkaip1	none	291.703	-0.220848	0.23112	0.620935	267.405	-0.0711705	0.630801	0.924479	219.422	0.0919688	0.577029	0.983338	231.293	0.10211	0.547286	0.760041	56.817	1.28165	0.00574422	0.0480459	TRUE	-0.05616	0.6125	0.9999	TRUE	-0.1256	0.2792	0.4636
ENSMUSG00000029673	Auts2	none	373.277	0.157057	0.381662	0.738573	406.215	0.106431	0.409496	0.833897	311.546	-0.168649	0.270526	0.924628	128.185	-0.872016	1.82475e-05	0.00027654	21.1575	-2.20686	0.00448603	0.0400217	TRUE	-0.1134	0.266	0.9999	TRUE	-0.1753	0.0894	0.2047
ENSMUSG00000003604	Aven	none	23.9835	0.0656535	0.906738	NA	16.0487	-0.102579	0.837476	0.971944	18.5894	-0.122631	0.769954	0.994132	20.2616	-0.0520509	0.896812	0.959155	15.6131	-1.01827	0.216177	0.539944	TRUE	0.1062	0.6281	0.9999	TRUE	-0.4588	0.0271	0.08238
ENSMUSG00000029787	Avl9	none	383.305	-0.0555701	0.730635	0.92198	437.437	0.189854	0.127986	0.566348	224.711	0.267629	0.0904955	0.732746	237.836	0.127932	0.447366	0.684959	88.1655	-0.00267436	0.994188	0.997705	TRUE	0.0206	0.8328	0.9999	TRUE	-0.05139	0.6088	0.7632
ENSMUSG00000037727	Avp	none	10.6465	1.75665	0.0518295	NA	NA	NA	NA	NA	7.66206	0.448735	0.488608	0.975974	11.0381	1.56387	0.00591758	0.0372813	3.62393	0.0855531	0.957494	0.989301	NA	NA	NA	NA	NA	NA	NA	NA
ENSMUSG00000018821	Avpi1	none	143.832	-0.0249331	0.919065	0.980345	69.7698	-0.367368	0.14265	0.58586	69.4179	0.0400241	0.871739	0.994132	81.0161	1.29302	4.67666e-07	1.0319e-05	8.94582	0.32466	0.750991	0.918751	TRUE	-0.1032	0.6449	0.9999	TRUE	0.3865	0.02374	0.07387
ENSMUSG00000078349	AW011738	none	4.94859	0.216303	0.852563	NA	NA	NA	NA	NA	9.63935	-0.342227	0.557966	0.980439	25.2618	-0.811717	0.0284662	0.11949	NA	NA	NA	NA	TRUE	-0.2285	0.3709	0.9999	TRUE	0.0318	0.8812	0.9383
ENSMUSG00000097428	AW047730	none	12.6685	-0.600984	0.418929	NA	NA	NA	NA	NA	4.58887	0.781577	0.379109	0.957654	364.581	-0.344257	0.0342323	0.137779	NA	NA	NA	NA	NA	NA	NA	NA	NA	NA	NA	NA
ENSMUSG00000074166	AW146154	none	19.0937	-0.624979	0.311888	NA	34.0255	0.54225	0.119252	0.549493	12.7522	0.0170489	0.973423	0.997323	32.4241	0.0674228	0.840086	0.930199	14.8558	0.391991	0.624533	0.859562	TRUE	0.1299	0.5512	0.9999	TRUE	0.1818	0.3703	0.5599
ENSMUSG00000039182	AW209491	none	160.795	-0.22274	0.3207	0.695168	164.228	-0.0393861	0.823215	0.970437	127.984	-0.0217497	0.907389	0.994132	94.0829	-0.17768	0.426312	0.666597	21.6196	0.659514	0.330853	0.663362	TRUE	-0.08721	0.5324	0.9999	TRUE	-0.146	0.2419	0.4208
ENSMUSG00000087334	AW495222	none	12.8135	0.922503	0.217302	NA	3.6551	-0.443078	0.670785	NA	7.15155	0.211868	0.75434	0.994132	5.25107	0.0216017	0.976905	0.990199	NA	NA	NA	NA	TRUE	-0.1531	0.6437	0.9999	TRUE	-0.3425	0.281	0.4656
ENSMUSG00000041935	AW549877	none	202.063	0.0441223	0.832666	0.954345	187.659	-0.261755	0.127123	0.565465	136.74	-0.156449	0.434604	0.964767	387.358	-0.0220538	0.890033	0.956038	100.191	0.64042	0.0867321	0.318963	TRUE	0.09587	0.3293	0.9999	TRUE	0.2108	0.02344	0.07306
ENSMUSG00000038112	AW551984	none	30.3327	-0.302577	0.532116	NA	8.88144	-0.227024	0.765871	NA	6.03201	-0.454097	0.54523	0.980148	57.1064	-0.151973	0.582976	0.785141	NA	NA	NA	NA	TRUE	0.8842	0.0006559	0.07937	TRUE	0.1106	0.6943	0.8227
ENSMUSG00000033632	AW554918	none	48.455	-0.144546	0.705231	NA	55.005	-0.154964	0.578935	0.907404	41.4025	0.279858	0.335565	0.948922	47.907	0.063239	0.823944	0.923289	21.3185	0.61867	0.37284	0.700076	TRUE	-0.04381	0.7867	0.9999	TRUE	0.01763	0.9013	0.9499
ENSMUSG00000024182	Axin1	none	89.8504	0.173932	0.552726	NA	92.0015	0.0655948	0.76411	0.957396	36.9403	-0.417471	0.191994	0.871485	75.4351	0.0335903	0.897545	0.959371	37.824	0.118183	0.819568	0.943628	TRUE	0.0131	0.9003	0.9999	TRUE	-0.03074	0.7942	0.8855
ENSMUSG00000000142	Axin2	none	65.9339	0.16368	0.631872	NA	40.0799	-0.141208	0.68185	0.935461	20.2641	0.0256289	0.948967	0.995591	54.9994	-0.367964	0.155466	0.373423	5.89484	-2.57533	0.0503386	0.221234	TRUE	-0.08077	0.5242	0.9999	TRUE	-0.007667	0.9496	0.9758
ENSMUSG00000002602	Axl	none	29.1962	0.906645	0.0789753	NA	6.78288	0.673146	0.381263	NA	15.4447	0.923678	0.0544029	0.630486	1763.16	-0.327801	0.0471778	0.171029	1307.61	3.52136	1.80904e-52	2.15619e-49	TRUE	-0.0963	0.3366	0.9999	TRUE	1.702	3.968e-53	5.582e-51
ENSMUSG00000039285	Azi2	none	172.751	-0.0925012	0.672298	0.897903	151.391	-0.0176223	0.924453	0.985895	198.307	-0.18151	0.301374	0.939405	167.379	-0.0332271	0.864717	0.943568	66.6605	0.181714	0.659047	0.878879	TRUE	0.1514	0.118	0.9172	TRUE	-0.2928	0.004277	0.01826
ENSMUSG00000037458	Azin1	none	920.811	-0.20783	0.125866	0.48244	912.018	0.173154	0.127571	0.566102	822.773	0.128616	0.319718	0.940643	731.519	0.341123	0.0277285	0.117289	218.231	0.731037	0.0085394	0.0641752	TRUE	0.01794	0.8532	0.9999	TRUE	0.2518	0.008701	0.03285
ENSMUSG00000028789	Azin2	none	86.9252	0.321746	0.278181	NA	46.8324	-0.0384345	0.898611	0.982009	61.4097	0.439549	0.1291	0.802139	36.0179	1.91769	1.15946e-07	2.83637e-06	6.4947	-0.507331	0.662409	0.880759	NA	NA	NA	NA	NA	NA	NA	NA
ENSMUSG00000093606	B130034C11Rik	none	4.62798	0.305254	0.80549	NA	3.62405	0.216094	0.838882	NA	NA	NA	NA	NA	5.39758	0.315628	0.676622	0.843017	NA	NA	NA	NA	TRUE	-0.2523	0.4846	0.9999	TRUE	0.04344	0.8827	0.9392
ENSMUSG00000097414	B130046B21Rik	none	9.18759	0.353535	0.684616	NA	6.51554	0.510687	0.561518	NA	NA	NA	NA	NA	3.27288	-0.568922	0.589516	0.789065	NA	NA	NA	NA	NA	NA	NA	NA	NA	NA	NA	NA
ENSMUSG00000086502	B130055M24Rik	none	11.4529	0.153714	0.842946	NA	8.24695	-0.271768	0.692703	NA	3.2133	0.272541	0.795889	0.994132	12.1168	-0.305674	0.556261	0.765591	NA	NA	NA	NA	NA	NA	NA	NA	NA	NA	NA	NA
ENSMUSG00000097547	B230110C06Rik	none	NA	NA	NA	NA	NA	NA	NA	NA	NA	NA	NA	NA	NA	NA	NA	NA	NA	NA	NA	NA	NA	NA	NA	NA	NA	NA	NA	NA
ENSMUSG00000027165	B230118H07Rik	none	191.218	-0.0643894	0.767154	0.937383	211.228	-0.312303	0.0488499	0.364206	159.863	0.229419	0.221611	0.897464	260.993	0.107539	0.505842	0.729582	53.9122	-0.0489743	0.913075	0.979448	TRUE	0.1125	0.4453	0.9999	TRUE	0.03199	0.8035	0.8907
ENSMUSG00000086003	B230206L02Rik	none	4.68561	-0.00569794	0.996345	NA	NA	NA	NA	NA	7.56663	0.324682	0.614228	0.98964	7.72186	0.171705	0.784082	0.90358	NA	NA	NA	NA	NA	NA	NA	NA	NA	NA	NA	NA
ENSMUSG00000097378	B230208H11Rik	none	973.475	0.0916375	0.90788	0.978261	532.024	1.25574	0.0440246	0.345844	300.031	-0.0437712	0.831257	0.994132	466.474	0.000476253	0.99821	0.999131	152.751	0.14422	0.642044	0.869423	NA	NA	NA	NA	NA	NA	NA	NA
ENSMUSG00000109006	B230209E15Rik	none	380.943	-0.327683	0.0426087	0.29188	204.307	-0.232787	0.145861	0.590302	60.6168	0.0697962	0.79721	0.994132	169.317	-0.0561475	0.777714	0.901317	8.71051	-1.09482	0.281181	0.613134	TRUE	0.01308	0.9205	0.9999	TRUE	-0.5203	2.443e-05	0.0001905
ENSMUSG00000089706	B230216N24Rik	none	34.0175	-0.306204	0.497879	NA	12.458	-0.57357	0.313655	0.767362	NA	NA	NA	NA	21.8973	-0.338255	0.412958	0.65548	NA	NA	NA	NA	TRUE	-0.272	0.3464	0.9999	TRUE	-0.2866	0.3919	0.5803
ENSMUSG00000050538	B230217C12Rik	none	111.007	-0.0992225	0.705155	0.913396	123.989	-0.553417	0.00585486	0.108795	138.787	-0.213102	0.262711	0.920035	63.9244	-0.485272	0.0532592	0.184934	7.06982	-0.931705	0.414063	0.732968	TRUE	-0.1135	0.3085	0.9999	TRUE	-0.543	1.629e-07	1.818e-06
ENSMUSG00000097785	B230217O12Rik	none	69.8836	-0.261145	0.44444	NA	45.1865	-0.328361	0.295019	0.754472	33.3902	-0.361715	0.258341	0.918876	33.9537	0.141762	0.65838	0.832301	NA	NA	NA	NA	TRUE	-0.1258	0.5116	0.9999	TRUE	-0.1458	0.3384	0.5279
ENSMUSG00000045767	B230219D22Rik	none	422.811	-0.209057	0.193815	0.574179	397.554	0.158387	0.233059	0.70226	362.789	-0.101304	0.456211	0.968528	256.292	-0.153283	0.342628	0.59196	150.839	0.470486	0.166987	0.473886	TRUE	0.02901	0.7443	0.9999	TRUE	-0.1689	0.07297	0.1757
ENSMUSG00000113701	B230303A05Rik	none	68.1937	0.0854672	0.813564	NA	168.007	-0.0873372	0.609665	0.917849	26.8823	0.0039418	0.991263	0.99783	53.759	-0.281766	0.328237	0.578093	NA	NA	NA	NA	NA	NA	NA	NA	NA	NA	NA	NA
ENSMUSG00000080717	B230307C23Rik	none	12.1814	-0.284367	0.706371	NA	11.4396	0.292672	0.617685	NA	14.8454	-0.351121	0.449122	0.967156	15.5112	0.329836	0.468313	0.704122	4.98882	0.332424	0.803666	0.936982	NA	NA	NA	NA	NA	NA	NA	NA
ENSMUSG00000104597	B230334C09Rik	none	NA	NA	NA	NA	NA	NA	NA	NA	NA	NA	NA	NA	NA	NA	NA	NA	4.35695	-4.62734	0.0160707	0.100602	NA	NA	NA	NA	NA	NA	NA	NA
ENSMUSG00000097119	B230354K17Rik	none	42.1166	-0.200848	0.622962	NA	38.3149	0.00445091	0.98912	0.9975	32.2606	0.142979	0.663234	0.991361	57.794	-0.309346	0.234878	0.476763	14.1689	-0.943015	0.240859	0.570509	NA	NA	NA	NA	NA	NA	NA	NA
ENSMUSG00000086350	B230369F24Rik	none	10.7334	-0.287085	0.717201	NA	12.4059	-0.150835	0.787207	0.96229	13.0843	-0.706493	0.171188	0.853199	12.1198	-0.726374	0.157814	0.376873	NA	NA	NA	NA	NA	NA	NA	NA	NA	NA	NA	NA
ENSMUSG00000060802	B2m	none	679.067	0.502764	0.00394492	0.078819	512.81	-0.0867301	0.570738	0.904709	388.591	0.226815	0.105213	0.768394	4461.09	0.312989	0.0456868	0.167284	30323	1.2021	3.58166e-10	2.15605e-08	TRUE	0.1555	0.149	0.9504	TRUE	2.479	3.732e-75	1.244e-72
ENSMUSG00000043300	B3galnt1	none	634.371	-0.448685	0.00232589	0.0567435	535.113	-0.0353567	0.761969	0.956775	359.654	-0.146372	0.390872	0.957654	342.945	-0.514746	0.00784753	0.0461604	146.298	0.407523	0.189305	0.50613	TRUE	-0.07933	0.4429	0.9999	TRUE	-0.3218	0.002741	0.01247
ENSMUSG00000039242	B3galnt2	none	19.5213	-0.519814	0.390831	NA	20.147	-0.357862	0.425483	0.844342	34.3207	-0.321664	0.310395	0.939405	34.008	0.0181504	0.955322	0.982731	14.8732	0.284546	0.720956	0.907029	TRUE	-0.2287	0.07954	0.8411	TRUE	0.09275	0.4435	0.628
ENSMUSG00000034780	B3galt1	none	231.842	-0.172389	0.377316	0.73384	228.723	-0.167592	0.287015	0.748672	140.138	-0.211619	0.353479	0.9512	293.357	-0.172309	0.319779	0.569802	8.83355	0.0483909	0.96263	0.990867	TRUE	-0.07662	0.4547	0.9999	TRUE	-0.2966	0.003982	0.01724
ENSMUSG00000033849	B3galt2	none	809.559	-0.719711	1.10607e-06	0.000233046	849.658	-0.534042	4.00423e-05	0.00331129	453.352	-0.00261101	0.989659	0.997356	738.454	-0.153299	0.307519	0.558116	23.4316	-1.33133	0.0447645	0.20529	TRUE	0.2244	0.04912	0.7225	TRUE	-0.2679	0.04676	0.1262
ENSMUSG00000067370	B3galt4	none	16.1775	0.562433	0.391023	NA	16.5025	-0.177276	0.723999	0.947779	13.943	0.165619	0.726728	0.993949	15.8072	-0.456148	0.318533	0.568818	19.2347	0.865511	0.252864	0.583974	TRUE	-0.2867	0.2716	0.9999	TRUE	-0.03504	0.8948	0.9461
ENSMUSG00000074892	B3galt5	none	76.5047	-0.131476	0.676249	NA	170.912	-0.118089	0.556593	0.899293	249.794	-0.0998692	0.51173	0.977729	229.641	-0.242438	0.179035	0.405248	76.9173	0.647582	0.100381	0.350042	TRUE	0.0609	0.5472	0.9999	TRUE	-0.05107	0.605	0.7604
ENSMUSG00000050796	B3galt6	none	53.0924	-0.209083	0.576982	NA	55.9854	-0.375515	0.173074	0.634563	30.3107	0.542878	0.111663	0.775209	34.8656	-0.277161	0.442828	0.681307	14.5733	0.672189	0.418158	0.736084	TRUE	-0.2248	0.1822	0.9878	TRUE	-0.3471	0.03747	0.1064
ENSMUSG00000045994	B3gat1	none	354.811	0.196219	0.246134	0.636197	383.656	-0.12331	0.395059	0.827037	162.549	-0.187388	0.34507	0.950864	172.633	0.013711	0.945873	0.980064	19.491	-1.70717	0.0260153	0.141458	TRUE	-0.1678	0.1052	0.8963	TRUE	-0.3639	0.0004248	0.002461
ENSMUSG00000026156	B3gat2	none	67.6557	-0.182791	0.578378	NA	41.1004	-1.11716	0.000429007	0.0193643	40.2661	0.0205563	0.948008	0.995591	89.5657	0.459278	0.0429843	0.160262	5.2225	-2.01162	0.13771	0.423252	TRUE	-0.05252	0.7457	0.9999	TRUE	-0.5786	0.0002594	0.001594
ENSMUSG00000071649	B3gat3	none	187.189	0.235951	0.263468	0.652615	97.294	-0.289665	0.178051	0.640613	125.011	-0.325135	0.0873078	0.729952	164.428	0.0741129	0.723462	0.870471	39.3855	-0.562007	0.267767	0.599753	TRUE	-0.08364	0.4649	0.9999	TRUE	-0.2398	0.02752	0.08337
ENSMUSG00000051950	B3glct	none	138.296	-0.0793648	0.742327	0.926976	92.8918	-0.18141	0.445422	0.855763	164.266	-0.560854	0.00309576	0.218812	344.154	-0.0133656	0.935657	0.976038	59.7278	0.0971057	0.827318	0.947979	NA	NA	NA	NA	NA	NA	NA	NA
ENSMUSG00000079445	B3gnt7	none	NA	NA	NA	NA	NA	NA	NA	NA	NA	NA	NA	NA	5.64735	1.3766	0.0852663	0.254924	41.754	3.18428	4.51912e-07	1.61412e-05	TRUE	0.06034	0.8966	0.9999	TRUE	1.489	2.922e-06	2.709e-05
ENSMUSG00000069920	B3gnt9	none	NA	NA	NA	NA	NA	NA	NA	NA	NA	NA	NA	NA	2.86194	1.66117	0.154137	0.371512	NA	NA	NA	NA	NA	NA	NA	NA	NA	NA	NA	NA
ENSMUSG00000046605	B3gntl1	none	17.033	-0.244766	0.698295	NA	16.6844	-0.322739	0.509713	0.880376	5.11971	-0.920226	0.268142	0.922347	12.5545	0.155674	0.753819	0.888794	8.8166	-2.30033	0.0391858	0.187928	TRUE	0.07531	0.6924	0.9999	TRUE	0.09463	0.5443	0.7128
ENSMUSG00000053706	B430305J03Rik	none	9.19743	0.0530319	0.951763	NA	5.47489	0.260452	0.7628	NA	NA	NA	NA	NA	6.45507	-0.030661	0.966457	0.986476	NA	NA	NA	NA	NA	NA	NA	NA	NA	NA	NA	NA
ENSMUSG00000006731	B4galnt1	none	392.152	0.0807494	0.617982	0.869979	297.792	0.00364562	0.982279	0.995699	157.649	-0.0242695	0.889654	0.994132	141.606	0.147251	0.469622	0.705496	92.159	1.15189	0.00259611	0.0262845	TRUE	-0.1105	0.265	0.9999	TRUE	-0.2401	0.005164	0.02148
ENSMUSG00000041372	B4galnt3	none	4.56956	-0.983235	0.419266	NA	NA	NA	NA	NA	13.8827	-0.234309	0.65397	0.991361	NA	NA	NA	NA	NA	NA	NA	NA	TRUE	-0.3693	0.3368	0.9999	TRUE	-0.8561	0.00681	0.027
ENSMUSG00000055629	B4galnt4	none	160.165	0.374395	0.127631	0.484929	134.653	0.179124	0.341165	0.789096	69.1682	0.170459	0.495391	0.976814	93.4711	-0.128816	0.618524	0.808316	NA	NA	NA	NA	TRUE	-0.3825	0.0001769	0.03602	TRUE	0.1517	0.1622	0.3165
ENSMUSG00000028541	B4galt2	none	67.9775	0.17588	0.600791	NA	38.029	0.201905	0.534311	0.89128	14.8183	-0.369368	0.455831	0.968305	34.957	0.047778	0.880074	0.950898	NA	NA	NA	NA	TRUE	-0.1878	0.08398	0.8499	TRUE	-0.2304	0.01983	0.06391
ENSMUSG00000052423	B4galt3	none	116.917	-0.120237	0.642927	0.883103	98.9601	-0.066869	0.767712	0.958821	72.5329	-0.494438	0.0395717	0.559396	76.2509	0.0838922	0.755604	0.889917	19.0309	-0.807798	0.305858	0.640558	TRUE	-0.1666	0.1227	0.9286	TRUE	-0.09032	0.3925	0.5809
ENSMUSG00000022793	B4galt4	none	62.6564	0.215564	0.560856	NA	95.5087	0.25237	0.284926	0.748092	46.4929	-0.575085	0.0530811	0.622606	231.5	0.177789	0.330479	0.580595	96.2172	-0.734434	0.0385708	0.186048	TRUE	0.00492	0.9695	0.9999	TRUE	0.1269	0.3316	0.5215
ENSMUSG00000017929	B4galt5	none	297.614	-0.0487138	0.783572	0.941395	251.328	-0.274365	0.108575	0.528863	407.932	-0.574681	0.00178736	0.170316	278.507	0.019622	0.910579	0.965927	69.325	1.0078	0.016544	0.102724	TRUE	-0.02042	0.8447	0.9999	TRUE	-0.08818	0.3648	0.5545
ENSMUSG00000056124	B4galt6	none	615.113	0.171819	0.232509	0.622022	755.259	0.0441739	0.744484	0.952539	633.974	-0.342903	0.0420775	0.574177	446.79	-0.371398	0.0440987	0.163224	98.5344	-0.0114547	0.976409	0.992396	TRUE	-0.03123	0.7328	0.9999	TRUE	-0.174	0.06574	0.1627
ENSMUSG00000021504	B4galt7	none	42.8639	0.499293	0.230858	NA	33.0522	-0.419875	0.223306	0.691248	38.5802	-0.00104601	0.997319	0.99895	37.8863	-0.429355	0.173108	0.397953	15.8781	0.887797	0.284801	0.618057	TRUE	-0.1672	0.3085	0.9999	TRUE	-0.1579	0.2571	0.4387
ENSMUSG00000047379	B4gat1	none	1079.64	-0.198952	0.140685	0.502404	991.513	-0.306636	0.0105733	0.159528	624.618	-0.121616	0.414291	0.958876	920.319	-0.187431	0.2111	0.447729	146.867	-0.414606	0.182615	0.498074	NA	NA	NA	NA	NA	NA	NA	NA
ENSMUSG00000052364	B630019K06Rik	none	73.1976	-0.106364	0.738881	NA	53.3146	-0.230291	0.412768	0.83616	62.4753	0.449187	0.108354	0.768394	36.3253	-0.0284299	0.929144	0.973253	NA	NA	NA	NA	TRUE	0.02004	0.8806	0.9999	TRUE	-0.4072	0.001536	0.007585
ENSMUSG00000097734	B930082K07Rik	none	4.79298	0.527713	0.654893	NA	4.54913	-0.532026	0.553382	NA	NA	NA	NA	NA	5.73807	0.785732	0.288701	0.540014	NA	NA	NA	NA	NA	NA	NA	NA	NA	NA	NA	NA
ENSMUSG00000001039	B9d1	none	48.7958	0.524967	0.173943	NA	40.9731	0.211256	0.570528	0.904661	15.9243	0.801509	0.0850471	0.722692	84.3043	0.548276	0.0234277	0.104517	7.2372	-1.52912	0.177665	0.490408	TRUE	-0.07611	0.6835	0.9999	TRUE	0.2432	0.1214	0.2565
ENSMUSG00000063439	B9d2	none	80.8199	0.261626	0.388964	NA	74.2564	0.10555	0.676859	0.935363	36.0731	0.394535	0.211043	0.890571	40.783	0.0116638	0.968238	0.986884	16.4706	0.308324	0.685676	0.892841	TRUE	0.05374	0.8085	0.9999	TRUE	0.2192	0.2506	0.4309
ENSMUSG00000022296	Baalc	none	237.877	0.182097	0.377038	0.733623	104.316	-0.0214294	0.925197	0.986191	44.0326	0.154465	0.588571	0.986324	596.103	-0.483751	0.000601328	0.00566264	16.6174	-2.68545	0.00146318	0.0168174	TRUE	-0.02622	0.7952	0.9999	TRUE	-0.1062	0.2695	0.4529
ENSMUSG00000031820	Babam1	none	274.126	0.244016	0.183711	0.561263	259.176	-0.00632621	0.965724	0.993322	156.532	0.125674	0.483697	0.973802	167.113	0.247802	0.173028	0.397898	66.222	0.370229	0.389195	0.712021	NA	NA	NA	NA	NA	NA	NA	NA
ENSMUSG00000052139	Babam2	none	249.576	-0.02222	0.906391	0.977701	376.078	0.298632	0.025169	0.259672	136.51	0.233027	0.229473	0.902699	119.815	0.0264909	0.894399	0.958088	82.3859	0.377845	0.330847	0.663362	NA	NA	NA	NA	NA	NA	NA	NA
ENSMUSG00000032086	Bace1	none	324.322	0.213299	0.219255	0.606812	321.662	-0.217291	0.143973	0.586558	360.796	-0.196031	0.194386	0.875278	232.999	0.0811106	0.636253	0.820337	24.3135	-1.97567	0.00384728	0.0358809	TRUE	0.0194	0.8314	0.9999	TRUE	-0.2214	0.009632	0.03574
ENSMUSG00000040605	Bace2	none	17.5977	0.159643	0.803882	NA	5.9768	0.211524	0.808616	NA	9.11036	0.443226	0.455813	0.968305	70.8508	1.87142	1.58017e-12	7.4697e-11	NA	NA	NA	NA	TRUE	0.1808	0.64	0.9999	TRUE	2.311	1.396e-12	2.692e-11
ENSMUSG00000025612	Bach1	none	31.5782	0.729681	0.140746	NA	22.5258	0.780765	0.0647764	0.42349	38.1705	-0.0384244	0.909708	0.994132	56.8084	0.68406	0.0113217	0.0611749	224.916	0.385284	0.217267	0.540897	TRUE	-0.1095	0.4958	0.9999	TRUE	0.7157	3.549e-10	5.394e-09
ENSMUSG00000040270	Bach2	none	6.96116	0.368951	0.707126	NA	6.71176	-0.0329052	0.965649	NA	5.26853	0.120034	0.874237	0.994132	12.3738	0.194585	0.69451	0.853548	18.7285	0.310506	0.670498	0.8857	TRUE	0.02777	0.8615	0.9999	TRUE	-0.1101	0.4086	0.597
ENSMUSG00000024959	Bad	none	66.3341	0.151912	0.645948	NA	53.8313	-0.213647	0.449254	0.856321	42.5103	0.120736	0.672295	0.991361	83.6785	0.180947	0.421464	0.662021	29.1432	0.210994	0.724816	0.908635	TRUE	0.1984	0.3169	0.9999	TRUE	0.0723	0.6705	0.8066
ENSMUSG00000028416	Bag1	none	87.0996	0.0588756	0.84108	NA	65.4524	-0.382374	0.131424	0.570629	118.508	0.154073	0.425616	0.962425	122.447	0.0301551	0.881398	0.951443	125.258	0.373819	0.252753	0.583974	TRUE	-0.01532	0.8864	0.9999	TRUE	-0.1426	0.1256	0.2628
ENSMUSG00000042215	Bag2	none	48.6971	0.0519993	0.895306	NA	35.6833	-0.393191	0.244708	0.712671	36.9107	-0.140088	0.66033	0.991361	32.5704	-0.232033	0.473399	0.707869	NA	NA	NA	NA	TRUE	0.0488	0.7953	0.9999	TRUE	-0.3025	0.09623	0.2162
ENSMUSG00000030847	Bag3	none	10.2666	-0.430801	0.593649	NA	43.3991	0.350286	0.305501	0.761104	131.671	0.306316	0.140765	0.818998	144.219	0.720769	0.000364032	0.00370415	61.3581	-0.372355	0.416757	0.735247	TRUE	0.3907	0.04124	0.6746	TRUE	0.8927	6.531e-08	7.739e-07
ENSMUSG00000037316	Bag4	none	413.02	-0.156217	0.334553	0.705361	489.158	0.170374	0.21191	0.680644	116.478	-0.209098	0.302076	0.939405	94.8309	-0.0533875	0.818208	0.921288	23.1658	0.883781	0.182448	0.497848	TRUE	0.002297	0.9822	0.9999	TRUE	0.02426	0.7947	0.8858
ENSMUSG00000049792	Bag5	none	409.692	-0.00947578	0.952733	0.990064	342.572	0.0643382	0.653578	0.930872	215.182	-0.170558	0.326241	0.943961	160.211	-0.0145877	0.940693	0.978529	57.0705	0.179287	0.681834	0.890313	TRUE	-0.09536	0.3628	0.9999	TRUE	-0.123	0.2526	0.4334
ENSMUSG00000024392	Bag6	none	1709.01	0.292737	0.0112763	0.143073	1213.08	0.13211	0.215866	0.68402	1410.11	-0.0796628	0.527507	0.979024	968.155	-0.193281	0.128804	0.33084	415.235	-0.0826364	0.738058	0.912164	TRUE	-0.06436	0.5733	0.9999	TRUE	-0.03599	0.7347	0.8495
ENSMUSG00000039741	Bahcc1	none	41.3492	-0.0236425	0.956288	NA	33.018	-0.0746103	0.830768	0.970437	29.0874	-0.137819	0.685041	0.991399	22.4005	0.231277	0.563273	0.770882	NA	NA	NA	NA	TRUE	-0.06264	0.5887	0.9999	TRUE	-0.2593	0.1242	0.2607
ENSMUSG00000040007	Bahd1	none	251.495	-0.105862	0.582673	0.853989	326.416	0.0732895	0.669903	0.935111	60.7494	0.0316026	0.909912	0.994132	59.5813	-0.299104	0.260677	0.507768	46.201	0.298591	0.556411	0.825982	TRUE	0.01005	0.9255	0.9999	TRUE	-0.04232	0.7062	0.8313
ENSMUSG00000025372	Baiap2	none	2360.35	-0.10718	0.321154	0.695635	2627.37	-0.0116677	0.898925	0.982047	729.904	0.0410535	0.758728	0.994132	311.304	-0.351374	0.0898184	0.262756	52.9737	-0.563001	0.223606	0.547275	TRUE	0.08564	0.4849	0.9999	TRUE	-0.1757	0.1027	0.2267
ENSMUSG00000018126	Baiap2l2	none	5.51257	0.304733	0.781817	NA	NA	NA	NA	NA	NA	NA	NA	NA	NA	NA	NA	NA	5.39716	5.27166	0.00506499	0.0438414	TRUE	-0.3402	0.456	0.9999	TRUE	-0.5063	0.1456	0.2927
ENSMUSG00000047507	Baiap3	none	64.3166	-0.270871	0.727094	NA	8.39119	0.518706	0.457086	NA	11.3896	0.387373	0.463488	0.970586	117.19	-0.264679	0.295111	0.54622	17.279	-2.71359	0.00126938	0.0151296	TRUE	0.1659	0.6508	0.9999	TRUE	-0.1259	0.615	0.7675
ENSMUSG00000057789	Bak1	none	47.8914	0.162014	0.673891	NA	13.5692	0.0434705	0.935601	0.988602	20.0838	0.19922	0.626449	0.991361	70.9492	0.237204	0.367109	0.61397	51.7002	1.54429	0.00136227	0.015997	TRUE	-0.07549	0.6799	0.9999	TRUE	0.4123	0.006374	0.02556
ENSMUSG00000024232	Bambi	none	17.4305	0.338921	0.616853	NA	37.7765	0.330612	0.322737	0.773501	7.94235	0.719289	0.249455	0.915024	75.9666	-0.452497	0.0598663	0.199312	23.9033	3.25742	9.53647e-05	0.00175952	TRUE	-0.129	0.5798	0.9999	TRUE	0.7897	0.001805	0.008697
ENSMUSG00000024844	Banf1	none	152.782	0.254838	0.268884	0.655752	126.896	-0.173782	0.378895	0.817017	126.672	-0.302918	0.113662	0.777081	154.919	-0.0916258	0.622544	0.8112	88.8653	-0.0705953	0.848396	0.956602	TRUE	0.002762	0.9838	0.9999	TRUE	-0.07125	0.5451	0.7136
ENSMUSG00000037922	Bank1	none	8.51688	0.764743	0.412623	NA	8.72009	-0.192208	0.786848	NA	NA	NA	NA	NA	NA	NA	NA	NA	39.564	-3.01812	1.32949e-07	5.35346e-06	TRUE	-0.2955	0.3965	0.9999	TRUE	-1.279	8.211e-05	0.000577
ENSMUSG00000025316	Banp	none	114.323	0.709109	0.00699549	0.112073	95.6907	0.307353	0.274356	0.741356	77.19	0.0999652	0.682874	0.991399	62.3536	-0.969774	0.000215197	0.0023632	16.2067	-0.587564	0.435625	0.750281	TRUE	0.4233	0.0001348	0.0303	TRUE	-0.1185	0.4347	0.6207
ENSMUSG00000021901	Bap1	none	432.142	0.152325	0.336625	0.706598	324.138	0.0726354	0.596856	0.911952	218.996	-0.0626933	0.689358	0.991776	216.461	0.0275418	0.87096	0.947066	63.1176	-0.519992	0.214554	0.537997	TRUE	-0.009071	0.9292	0.9999	TRUE	-0.2549	0.003955	0.01716
ENSMUSG00000032033	Barx2	none	21.953	-0.047714	0.932991	NA	NA	NA	NA	NA	15.6353	0.00461854	0.991793	0.997991	10.859	0.59786	0.27032	0.517929	NA	NA	NA	NA	TRUE	0.1704	0.7022	0.9999	TRUE	-0.09284	0.8018	0.8896
ENSMUSG00000045763	Basp1	none	1524.52	-0.156515	0.180564	0.559226	971.205	-0.266652	0.0809347	0.473415	124.468	-0.0503314	0.788157	0.994132	563.566	-0.560159	0.00267233	0.0195042	690.059	-0.320686	0.167559	0.474575	TRUE	-0.06088	0.5098	0.9999	TRUE	-0.2602	0.01653	0.05527
ENSMUSG00000026630	Batf3	none	5.20144	-0.208048	0.853396	NA	4.544	2.87862	0.0130551	NA	NA	NA	NA	NA	NA	NA	NA	NA	12.3333	-0.873693	0.32518	0.656542	FALSE	-0.2988	0.7118	NA	TRUE	2.747	3.182e-15	7.314e-14
ENSMUSG00000003873	Bax	none	45.8873	0.548205	0.186084	NA	36.4336	0.110732	0.7407	0.9515	25.487	0.329656	0.358032	0.953003	51.67	0.760528	0.00911686	0.0520817	34.5302	0.591243	0.287612	0.620217	TRUE	-0.09864	0.4488	0.9999	TRUE	0.3377	0.003769	0.01651
ENSMUSG00000035021	Baz1a	none	4.81246	-0.0608735	0.958659	NA	NA	NA	NA	NA	NA	NA	NA	NA	3.90322	-0.815335	0.393381	0.638551	56.9068	0.144216	0.760465	0.922338	TRUE	-0.0252	0.9374	0.9999	TRUE	1.199	3.675e-05	0.0002766
ENSMUSG00000002748	Baz1b	none	1030.69	-0.138426	0.276714	0.665087	1027.46	-0.074453	0.541683	0.893084	369.337	0.0728822	0.627401	0.991361	206.694	-0.687425	0.000182368	0.00205537	186.429	-0.385094	0.179144	0.492492	TRUE	0.148	0.1014	0.8881	TRUE	-0.1182	0.3375	0.5273
ENSMUSG00000040054	Baz2a	none	304.068	0.0905779	0.604916	0.863474	302.884	-0.0850705	0.555109	0.899293	265.723	-0.166154	0.288141	0.935078	167.559	-0.450429	0.0145721	0.0735614	70.709	-0.0103314	0.980147	0.993629	TRUE	-0.07277	0.3897	0.9999	TRUE	-0.04804	0.6043	0.7602
ENSMUSG00000026987	Baz2b	none	104.144	-0.55869	0.0386671	0.275521	82.5127	-0.0830679	0.728885	0.948749	105.569	0.037993	0.862482	0.994132	82.2427	0.0613391	0.786347	0.904773	83.2621	-0.227193	0.543616	0.819816	TRUE	0.1352	0.2589	0.9999	TRUE	0.1559	0.1528	0.3029
ENSMUSG00000085218	BB218582	none	4.76392	-1.47371	0.239384	NA	8.45874	-0.520679	0.442755	NA	NA	NA	NA	NA	9.51894	-0.281326	0.637392	0.820654	NA	NA	NA	NA	NA	NA	NA	NA	NA	NA	NA	NA
ENSMUSG00000002083	Bbc3	none	15.4673	0.526526	0.438035	NA	17.8174	0.582518	0.233068	0.70226	6.68755	0.194128	0.77669	0.994132	9.34661	0.89505	0.137317	0.345252	9.00821	0.628869	0.55301	0.824342	TRUE	-0.1704	0.5868	0.9999	TRUE	0.4945	0.09996	0.2222
ENSMUSG00000084957	Bbip1	none	224.024	-0.215951	0.316784	0.693543	185.362	-0.297749	0.109291	0.529992	162.975	-0.34583	0.0519342	0.616875	473.709	-0.325996	0.062443	0.2054	97.996	0.515627	0.149433	0.445383	TRUE	-0.00184	0.9872	0.9999	TRUE	-0.1993	0.08366	0.1949
ENSMUSG00000057265	Bbof1	none	10.8986	-0.0229047	0.976765	NA	12.9782	0.121429	0.827634	0.970437	7.0233	-0.129238	0.853827	0.994132	9.20725	-0.282767	0.657963	0.83213	NA	NA	NA	NA	NA	NA	NA	NA	NA	NA	NA	NA
ENSMUSG00000006464	Bbs1	none	109.267	0.334577	0.222172	0.61106	69.8815	0.0673543	0.803018	0.967641	39.6768	0.495712	0.114143	0.777081	58.1843	0.122958	0.646666	0.825522	12.1188	-1.64859	0.0615683	0.254752	TRUE	0.07175	0.4565	0.9999	TRUE	-0.1085	0.2342	0.4121
ENSMUSG00000035759	Bbs10	none	39.0927	0.0213679	0.959973	NA	45.3295	0.236029	0.460349	0.861572	27.4361	0.0246666	0.945327	0.995591	29.3137	-0.283003	0.399162	0.642898	8.68469	0.107468	0.918327	0.980441	TRUE	0.1309	0.5774	0.9999	TRUE	0.1189	0.5673	0.732
ENSMUSG00000051444	Bbs12	none	26.9403	-0.985997	0.0579156	NA	45.8101	0.338456	0.285354	0.748092	16.8368	0.491593	0.285992	0.932376	19.1555	-0.35907	0.380595	0.626253	9.55472	0.375116	0.70215	0.899039	TRUE	0.2191	0.3285	0.9999	TRUE	-0.2002	0.3342	0.5242
ENSMUSG00000031755	Bbs2	none	128.723	-0.111309	0.65533	0.890466	132.199	0.00160165	0.993667	0.998738	67.1466	-0.282864	0.252746	0.916617	75.5724	-0.394852	0.0913215	0.265737	25.2896	0.156006	0.804372	0.937084	TRUE	0.07305	0.528	0.9999	TRUE	0.02476	0.8376	0.912
ENSMUSG00000025235	Bbs4	none	554.014	-0.185572	0.216125	0.6035	599.566	-0.0324876	0.792661	0.963908	431.171	0.164411	0.213995	0.890745	316.369	-0.00153617	0.992396	0.996304	43.3387	-0.460047	0.357589	0.688924	TRUE	0.06852	0.5099	0.9999	TRUE	-0.07402	0.49	0.669
ENSMUSG00000063145	Bbs5	none	149.553	-0.0429169	0.858957	0.963377	185.108	0.113129	0.5401	0.891674	64.1813	0.0681646	0.793397	0.994132	41.7656	-0.281689	0.343795	0.59238	13.6398	-0.947019	0.24655	0.576332	TRUE	0.02135	0.8849	0.9999	TRUE	0.04878	0.7144	0.8367
ENSMUSG00000037325	Bbs7	none	147.754	-0.37556	0.118388	0.473071	219.738	0.006772	0.966371	0.993322	76.556	-0.106077	0.644317	0.991361	50.8821	-0.236518	0.387641	0.632959	26.2456	-0.0650146	0.915541	0.979723	TRUE	0.145	0.2948	0.9999	TRUE	-0.02994	0.8128	0.8967
ENSMUSG00000035919	Bbs9	none	102.052	-0.000163461	0.999531	0.999806	63.9262	-0.329944	0.236159	0.706325	30.0484	0.080454	0.819213	0.994132	49.4773	0.17675	0.516622	0.737974	69.9749	-0.844041	0.0442346	0.2038	TRUE	0.2331	0.1667	0.9748	TRUE	-0.03597	0.7914	0.8839
ENSMUSG00000022641	Bbx	none	190.66	-0.402243	0.0554243	0.334518	236.413	0.109624	0.522839	0.884031	201.246	-0.0248373	0.879681	0.994132	181.922	0.153379	0.396882	0.641147	130.013	0.385106	0.252364	0.58361	TRUE	0.1599	0.2191	0.9954	TRUE	0.3107	0.005552	0.02277
ENSMUSG00000060149	BC002059	none	46.1015	-0.781814	0.0600529	NA	94.15	0.181993	0.434898	0.848676	36.8599	-0.315585	0.314761	0.939405	43.7446	-0.935188	0.00156252	0.0125107	22.8653	0.564859	0.393057	0.71388	NA	NA	NA	NA	NA	NA	NA	NA
ENSMUSG00000067722	BC003965	none	50.6317	-0.232697	0.541631	NA	54.641	-0.275082	0.324543	0.774499	32.4121	0.00234123	0.994218	0.998152	66.7856	-0.289036	0.226042	0.465989	19.2773	-0.61153	0.386776	0.709442	TRUE	-0.07942	0.5135	0.9999	TRUE	-0.209	0.1097	0.2382
ENSMUSG00000052712	BC004004	none	532.321	0.00718568	0.962562	0.992245	465.228	-0.188121	0.131871	0.571425	585.509	-0.17985	0.184611	0.867516	626.45	-0.0639178	0.671676	0.839947	266.231	0.351496	0.179768	0.493471	TRUE	-0.1453	0.1662	0.9747	TRUE	0.07273	0.4657	0.6489
ENSMUSG00000019132	BC005537	none	155.728	-0.00470022	0.984103	0.997747	117.339	0.28022	0.167172	0.627287	98.0442	0.191434	0.352359	0.9512	154.861	0.304519	0.10019	0.282886	79.4462	0.312706	0.437174	0.751467	TRUE	-0.01011	0.9134	0.9999	TRUE	-0.138	0.1394	0.2834
ENSMUSG00000079065	BC005561	none	92.4189	-0.381728	0.181914	NA	146.041	0.169673	0.406698	0.832043	90.0875	-0.116192	0.630286	0.991361	46.2213	-0.220426	0.443529	0.681782	28.1301	0.370494	0.565938	0.829396	TRUE	0.1625	0.5787	0.9999	TRUE	0.306	0.3561	0.5456
ENSMUSG00000026851	BC005624	none	242.013	0.228631	0.247496	0.637436	182.631	-0.0109035	0.952447	0.991677	139.702	0.0856342	0.668585	0.991361	123.192	-0.055524	0.780384	0.902087	73.6107	0.0340588	0.93177	0.984467	TRUE	0.04355	0.6509	0.9999	TRUE	-0.2095	0.03772	0.1069
ENSMUSG00000041674	BC006965	none	4.59847	-0.0822814	0.946165	NA	NA	NA	NA	NA	NA	NA	NA	NA	10.3415	-0.902741	0.104682	0.290985	NA	NA	NA	NA	TRUE	-0.5615	0.1844	0.9878	TRUE	0.05757	0.8606	0.927
ENSMUSG00000030780	BC017158	none	76.1232	0.230323	0.467037	NA	66.6014	-0.0398568	0.876108	0.978534	63.8806	0.0798208	0.74331	0.994132	78.6914	-0.125222	0.586308	0.787075	27.9973	0.703857	0.28046	0.612235	TRUE	-0.03244	0.8118	0.9999	TRUE	0.1719	0.1424	0.2879
ENSMUSG00000081137	BC022960	none	6.58179	0.164299	0.870062	NA	6.71639	0.237184	0.761251	NA	7.94856	-0.156469	0.804321	0.994132	NA	NA	NA	NA	NA	NA	NA	NA	NA	NA	NA	NA	NA	NA	NA	NA
ENSMUSG00000112160	BC024063	none	9.18693	-0.337444	0.701633	NA	16.5881	0.113875	0.829804	0.970437	9.13831	0.212035	0.727195	0.993949	6.88126	-0.525107	0.431676	0.671747	5.10955	0.593888	0.68148	0.89004	NA	NA	NA	NA	NA	NA	NA	NA
ENSMUSG00000078786	BC024978	none	28.9326	0.361877	0.462297	NA	21.6141	0.355473	0.434625	0.848676	39.0905	0.276269	0.393516	0.957654	42.522	-0.106767	0.7229	0.870016	24.4881	-0.222667	0.728016	0.909126	TRUE	0.04054	0.8483	0.9999	TRUE	-0.08406	0.6326	0.7799
ENSMUSG00000074862	BC025920	none	11.1706	-0.723424	0.362693	NA	8.94626	0.126487	0.854496	NA	3.94485	0.366249	0.677163	0.991399	5.55005	-0.736889	0.333731	0.583651	NA	NA	NA	NA	TRUE	0.0463	0.8382	0.9999	TRUE	-0.1085	0.6409	0.7855
ENSMUSG00000038543	BC028528	none	NA	NA	NA	NA	NA	NA	NA	NA	NA	NA	NA	NA	NA	NA	NA	NA	133.606	0.841109	0.0127514	0.0856729	TRUE	-0.2816	0.4763	0.9999	TRUE	1.017	0.0009181	0.004843
ENSMUSG00000074649	BC029722	none	29.8574	0.0919332	0.851607	NA	22.5976	0.267824	0.538213	0.891674	25.2726	0.84889	0.03154	0.518174	34.7487	0.319151	0.342035	0.591829	8.80877	0.0661337	0.948766	0.987513	TRUE	-0.06527	0.5689	0.9999	TRUE	-0.0009851	0.9932	0.997
ENSMUSG00000049946	BC030500	none	10.2861	-0.286868	0.724022	NA	17.5377	0.151993	0.763203	0.957029	14.0384	0.212016	0.653737	0.991361	NA	NA	NA	NA	NA	NA	NA	NA	TRUE	-0.3568	0.06669	0.8059	TRUE	-0.481	0.01163	0.04175
ENSMUSG00000036299	BC031181	none	250.066	-0.253344	0.243059	0.633058	452.124	-0.0133311	0.928991	0.987768	526.939	-0.257361	0.0840103	0.719513	679.135	0.193887	0.244157	0.48778	139.725	0.480867	0.133394	0.414568	TRUE	-0.0543	0.572	0.9999	TRUE	-0.03838	0.691	0.8202
ENSMUSG00000033722	BC034090	none	9.37228	-0.34526	0.682586	NA	NA	NA	NA	NA	8.76812	0.803966	0.203641	0.885503	24.8743	-0.784335	0.0541592	0.186622	NA	NA	NA	NA	NA	NA	NA	NA	NA	NA	NA	NA
ENSMUSG00000053684	BC048403	none	44.6063	-0.384784	0.349736	NA	46.6638	-0.126488	0.670723	0.935111	30.562	0.0826018	0.809058	0.994132	24.7804	0.799133	0.0344449	0.138478	16.1112	0.107023	0.890872	0.972524	TRUE	-0.06027	0.7116	0.9999	TRUE	0.0267	0.8645	0.9293
ENSMUSG00000091996	BC049352	none	NA	NA	NA	NA	NA	NA	NA	NA	NA	NA	NA	NA	NA	NA	NA	NA	NA	NA	NA	NA	NA	NA	NA	NA	NA	NA	NA	NA
ENSMUSG00000047515	BC049715	none	4.42336	-0.0871719	0.943547	NA	4.57738	-1.38263	0.143454	NA	NA	NA	NA	NA	4.36731	1.10886	0.210753	0.447325	NA	NA	NA	NA	TRUE	-0.06513	0.8958	0.9999	TRUE	-0.1283	0.7717	0.8724
ENSMUSG00000092564	BC051226	none	16.0792	-0.0885194	0.898813	NA	11.2971	-0.436064	0.451357	NA	7.52541	-0.0537906	0.934314	0.995591	14.9555	-0.212143	0.645096	0.824696	NA	NA	NA	NA	TRUE	-0.3456	0.2616	0.9999	TRUE	-0.1442	0.6154	0.7678
ENSMUSG00000040282	BC052040	none	45.645	-0.268523	0.508622	NA	39.2534	-0.219776	0.49828	0.876583	42.8313	-0.00369031	0.989994	0.997356	30.4053	-0.106874	0.750357	0.886616	6.02286	-0.248191	0.843315	0.954723	TRUE	0.2569	0.1954	0.9879	TRUE	-0.2606	0.199	0.3671
ENSMUSG00000041406	BC055324	none	9.33309	0.308372	0.717959	NA	6.95421	0.721	0.347472	NA	20.9795	-0.240872	0.559366	0.980439	13.064	0.169782	0.733205	0.876874	7.68819	-0.133199	0.914869	0.979477	TRUE	-0.06722	0.8734	0.9999	TRUE	0.5856	0.1262	0.2637
ENSMUSG00000021763	BC067074	none	6.69854	0.274157	0.783864	NA	NA	NA	NA	NA	4.89124	1.21958	0.161526	0.84432	198.507	1.98911	7.31013e-24	7.90602e-22	3.95025	-0.645434	0.684359	0.892038	NA	NA	NA	NA	NA	NA	NA	NA
ENSMUSG00000115783	Bc1	none	322.351	-1.16261	0.177824	0.554967	80.6696	-0.176863	0.826918	0.970437	279.239	0.0319737	0.960747	0.997183	454.869	-0.228985	0.751998	0.887527	347.941	-0.853872	0.00858219	0.0642936	NA	NA	NA	NA	NA	NA	NA	NA
ENSMUSG00000002980	Bcam	none	15.613	0.182304	0.788948	NA	NA	NA	NA	NA	10.7842	0.489994	0.374906	0.957473	94.9203	0.441544	0.0576094	0.19452	5.41799	0.169572	0.908321	0.978072	TRUE	-0.02536	0.8951	0.9999	TRUE	0.05656	0.709	0.8334
ENSMUSG00000004892	Bcan	none	175.011	0.290633	0.204467	0.589367	155.688	-0.0320868	0.878058	0.978903	339.663	-0.0905018	0.537766	0.979472	9987.57	-1.04935	8.18311e-12	3.57254e-10	75.4114	-1.65767	0.000330297	0.00492101	TRUE	-0.2323	0.04088	0.6721	TRUE	-0.1342	0.234	0.4119
ENSMUSG00000020650	Bcap29	none	365.527	-0.435262	0.0144662	0.163285	451.016	-0.21474	0.0857729	0.481264	351.701	-0.351044	0.0409277	0.568861	837.061	-0.0563897	0.71971	0.868519	247.524	0.405914	0.153118	0.451737	TRUE	-0.06603	0.5664	0.9999	TRUE	0.1305	0.24	0.4187
ENSMUSG00000002015	Bcap31	none	448.147	-0.268814	0.0909045	0.415448	433.766	-0.264722	0.0393676	0.327549	626.878	-0.417875	0.00271317	0.200588	886.755	-0.049001	0.717293	0.866996	518.209	0.29896	0.198785	0.519663	TRUE	0.03357	0.7316	0.9999	TRUE	-0.2174	0.05068	0.1342
ENSMUSG00000031955	Bcar1	none	232.643	0.340755	0.107982	0.45021	184.62	0.134351	0.478524	0.867468	437.412	-0.28905	0.0454558	0.587682	121.373	0.638437	0.00228375	0.0171131	8.34879	-1.65064	0.116517	0.383842	TRUE	-0.1695	0.1706	0.9777	TRUE	0.3593	0.002059	0.009749
ENSMUSG00000028121	Bcar3	none	50.0219	0.268133	0.50507	NA	5.71821	0.101919	0.903101	NA	18.1712	0.397741	0.383298	0.957654	168.78	-1.26123	2.98191e-10	1.08045e-08	43.7092	2.76469	2.07335e-06	6.13207e-05	TRUE	0.321	0.05548	0.7541	TRUE	0.3444	0.01363	0.04728
ENSMUSG00000013523	Bcas1	none	60.2286	0.227777	0.510145	NA	5.59562	1.28803	0.161469	NA	23.2974	0.834728	0.395364	0.957654	345.401	3.69444	2.74318e-77	2.61078e-74	13.9943	0.463421	0.634194	0.864506	TRUE	0.06293	0.5422	0.9999	TRUE	0.5212	7.661e-06	6.585e-05
ENSMUSG00000005687	Bcas2	none	441.732	-0.144079	0.355315	0.720264	481.413	-0.146737	0.363733	0.806948	551.976	-0.235956	0.118837	0.789629	566.808	0.0648927	0.666806	0.837396	225.945	0.195293	0.49073	0.78817	TRUE	-0.008284	0.938	0.9999	TRUE	-0.001974	0.9851	0.9928
ENSMUSG00000059439	Bcas3	none	584.179	0.271244	0.0702814	0.369642	582.191	0.015898	0.889733	0.980844	265.123	0.0717275	0.637511	0.991361	259.824	0.338391	0.042326	0.158678	80.6139	-0.456777	0.252449	0.583694	TRUE	-0.0141	0.895	0.9999	TRUE	-0.1625	0.07928	0.1872
ENSMUSG00000030268	Bcat1	none	475.663	0.079529	0.60086	0.860665	491.752	-0.234278	0.0610703	0.411427	872.401	0.0952044	0.506111	0.977729	114.784	0.113025	0.575762	0.77976	32.6028	-1.97857	0.00101184	0.0125496	TRUE	0.0331	0.715	0.9999	TRUE	-0.2939	0.0005729	0.003211
ENSMUSG00000030826	Bcat2	none	34.8824	0.0887661	0.843926	NA	23.7072	-1.14606	0.00549129	0.105287	8.29065	-0.0640931	0.915732	0.994132	32.9959	-0.535088	0.108506	0.297433	28.3277	0.143968	0.806933	0.939203	TRUE	0.2923	0.08015	0.8422	TRUE	0.07523	0.6329	0.78
ENSMUSG00000030983	Bccip	none	213.615	-0.0353245	0.86387	0.964403	235.492	-0.0455915	0.772053	0.959134	90.1379	0.0845208	0.690088	0.991887	155.107	0.156719	0.401409	0.644893	65.6332	0.284522	0.505523	0.797552	TRUE	0.04707	0.6778	0.9999	TRUE	-0.1813	0.1334	0.2746
ENSMUSG00000037525	Bcdin3d	none	12.3469	-0.440698	0.551321	NA	8.38296	0.564672	0.416469	NA	13.3046	-0.151566	0.753327	0.994132	11.647	-0.454603	0.424564	0.665175	6.39019	0.611642	0.61777	0.854992	TRUE	-0.1969	0.4963	0.9999	TRUE	0.1991	0.4575	0.6418
ENSMUSG00000027792	Bche	none	9.4203	-0.25794	0.764634	NA	NA	NA	NA	NA	4.73518	-0.294467	0.716008	0.992897	33.8208	-1.07871	0.00256389	0.0188185	NA	NA	NA	NA	TRUE	-0.08797	0.7066	0.9999	TRUE	-0.5618	0.01642	0.05497
ENSMUSG00000060376	Bckdha	none	119.942	0.407726	0.121669	0.476771	112.633	-0.138741	0.506195	0.87963	74.124	0.041026	0.855494	0.994132	200.41	0.1612	0.341743	0.591648	65.591	0.20567	0.641411	0.869423	TRUE	-0.1169	0.42	0.9999	TRUE	0.3857	0.008098	0.031
ENSMUSG00000032263	Bckdhb	none	122.362	0.0156379	0.950459	0.98968	166.845	-0.312798	0.0855503	0.481187	164.728	-0.110511	0.521938	0.977956	62.6789	-0.831132	0.00142868	0.0116681	16.3005	-0.473167	0.546164	0.821313	TRUE	0.0543	0.6832	0.9999	TRUE	-0.2787	0.02263	0.07104
ENSMUSG00000030802	Bckdk	none	224.816	0.22494	0.254654	0.64442	200.404	0.0148039	0.929047	0.987768	116.415	0.448116	0.0235743	0.470351	150.817	0.23434	0.209248	0.445323	77.3178	-0.175088	0.657337	0.877651	TRUE	-0.1657	0.1175	0.9172	TRUE	0.06947	0.5299	0.7015
ENSMUSG00000028191	Bcl10	none	51.0311	-0.101868	0.787926	NA	51.1916	0.0529365	0.852944	0.976385	33.6945	0.232383	0.476647	0.973539	121.815	0.338438	0.0971545	0.276644	121.504	1.0916	0.00152614	0.0174068	TRUE	0.01836	0.9128	0.9999	TRUE	0.3404	0.01952	0.06313
ENSMUSG00000000861	Bcl11a	none	887.141	0.117885	0.369075	0.729758	1034.07	-0.300676	0.0051682	0.10106	153.133	-0.194434	0.268207	0.922347	166.596	-0.278331	0.167344	0.390143	15.0429	-0.800426	0.323454	0.655833	TRUE	-0.02266	0.8122	0.9999	TRUE	-0.4354	1.263e-05	0.0001042
ENSMUSG00000048251	Bcl11b	none	393.034	-0.174612	0.317714	0.694238	772.24	0.227445	0.048552	0.362984	42.5715	0.185992	0.531106	0.979024	92.3429	-0.327708	0.138874	0.347192	17.424	-1.88638	0.0195206	0.115238	TRUE	-0.09285	0.3361	0.9999	TRUE	-0.3205	0.01759	0.05822
ENSMUSG00000057329	Bcl2	none	38.2363	-0.485135	0.264219	NA	10.2446	-0.213428	0.732734	NA	17.0635	-0.156063	0.727159	0.993949	183.757	0.18916	0.280668	0.530239	16.9166	1.99377	0.0165135	0.102724	TRUE	0.256	0.1273	0.9343	TRUE	0.9703	4.93e-16	1.209e-14
ENSMUSG00000007659	Bcl2l1	none	265.796	0.406814	0.0320899	0.252145	163.631	-0.0333367	0.869063	0.9775	202.944	0.0790641	0.662538	0.991361	178.35	0.513877	0.00379257	0.025918	134.378	1.20918	0.00102376	0.0126842	TRUE	-0.05406	0.5779	0.9999	TRUE	0.1108	0.2063	0.3773
ENSMUSG00000027381	Bcl2l11	none	7.86523	0.00243397	0.997887	NA	4.09919	0.946343	0.408267	NA	17.5284	0.795871	0.0852158	0.723123	10.2227	0.0894605	0.876736	0.949138	55.4561	1.19727	0.00955483	0.0693147	TRUE	0.1154	0.5715	0.9999	TRUE	0.4495	0.007189	0.02818
ENSMUSG00000009112	Bcl2l13	none	162.765	0.0817033	0.723327	0.91819	123.918	0.221412	0.256862	0.724255	74.3039	0.214319	0.370416	0.956332	111.952	-0.0275708	0.890968	0.956353	26.7745	0.655729	0.311857	0.645675	TRUE	-0.03818	0.6869	0.9999	TRUE	-0.08515	0.36	0.5496
ENSMUSG00000089682	Bcl2l2	none	10.7532	1.0939	0.599037	NA	3.97438	-1.79521	0.088759	NA	9.06534	-0.22412	0.709251	0.992723	9.08487	-0.371381	0.523371	0.742413	NA	NA	NA	NA	TRUE	0.003573	0.9679	0.9999	TRUE	-0.2403	0.01647	0.05512
ENSMUSG00000022508	Bcl6	none	214.879	0.289845	0.148323	0.511689	636.496	-0.0538358	0.676032	0.935363	303.815	0.440438	0.00274113	0.200693	175.416	0.354808	0.0467961	0.170207	83.917	0.563157	0.138575	0.425076	TRUE	0.09284	0.3628	0.9999	TRUE	-0.08795	0.5117	0.6882
ENSMUSG00000000317	Bcl6b	none	NA	NA	NA	NA	NA	NA	NA	NA	NA	NA	NA	NA	NA	NA	NA	NA	NA	NA	NA	NA	TRUE	-0.2228	0.4998	0.9999	TRUE	-0.8843	0.001451	0.007233
ENSMUSG00000029438	Bcl7a	none	457.843	0.176316	0.252155	0.641739	487.585	-0.0514402	0.671444	0.935111	244.188	-0.281048	0.0669333	0.674033	162.548	-0.339273	0.0684921	0.218404	25.4587	-0.198883	0.752537	0.918751	TRUE	-0.1493	0.1064	0.8991	TRUE	-0.1142	0.1809	0.3427
ENSMUSG00000029681	Bcl7b	none	195.9	0.065786	0.758257	0.934093	160.057	-0.122069	0.505354	0.879285	175.292	-0.0524581	0.757824	0.994132	132.036	-0.0534866	0.781835	0.902283	71.0769	0.302122	0.45572	0.763666	TRUE	-0.02512	0.8295	0.9999	TRUE	-0.0285	0.7902	0.8831
ENSMUSG00000030814	Bcl7c	none	17.3243	0.64205	0.31799	NA	8.93216	-0.623622	0.355579	NA	9.58778	-0.263952	0.64745	0.991361	30.473	0.722748	0.0373099	0.146329	10.3253	-0.527912	0.572802	0.832257	TRUE	-0.2939	0.2665	0.9999	TRUE	0.3483	0.1406	0.2852
ENSMUSG00000038256	Bcl9	none	192.876	-0.109509	0.603323	0.862036	200.261	-0.277484	0.10238	0.515852	112.619	-0.125854	0.519977	0.977956	126.098	-0.251998	0.187412	0.417458	46.7311	-0.607398	0.211795	0.535282	TRUE	-0.04069	0.6885	0.9999	TRUE	-0.2089	0.05392	0.1403
ENSMUSG00000063382	Bcl9l	none	121.741	0.0999206	0.691526	0.906634	105.429	0.19588	0.355281	0.802326	70.0478	-0.164147	0.538736	0.979472	92.259	-0.868589	0.000285748	0.00300836	65.8848	-0.659494	0.110159	0.369914	TRUE	-0.09609	0.4335	0.9999	TRUE	0.04737	0.7308	0.8469
ENSMUSG00000037608	Bclaf1	none	1171.03	-0.456073	0.00057124	0.0225672	1285.19	0.0275683	0.826084	0.970437	693.277	-0.0960657	0.419443	0.960092	372.309	-0.117361	0.54884	0.760692	185.281	0.138344	0.642142	0.869423	TRUE	-0.05631	0.5576	0.9999	TRUE	-0.01362	0.8875	0.9415
ENSMUSG00000044150	Bclaf3	none	94.4984	-0.463789	0.102121	NA	87.8913	0.106467	0.662881	0.933942	48.7626	-0.291773	0.300969	0.939405	44.5882	-0.501213	0.0865641	0.257246	21.747	0.690664	0.321483	0.654637	NA	NA	NA	NA	NA	NA	NA	NA
ENSMUSG00000040363	Bcor	none	251.711	0.234943	0.25008	0.639974	156.983	0.461463	0.00976151	0.153034	55.02	-0.192502	0.455296	0.968272	72.8748	-0.614457	0.00897514	0.0514988	105.234	-0.0226318	0.950444	0.987552	TRUE	-0.1	0.4295	0.9999	TRUE	-0.3429	0.003164	0.01412
ENSMUSG00000036959	Bcorl1	none	193.267	-0.152251	0.47453	0.796518	159.457	-0.264147	0.197257	0.666011	95.4736	-0.530898	0.0130068	0.387342	116.72	-0.901597	1.41639e-05	0.000221714	12.7614	-0.765494	0.376932	0.702661	TRUE	-0.0496	0.6786	0.9999	TRUE	-0.3486	0.00266	0.01217
ENSMUSG00000009681	Bcr	none	639.088	0.126613	0.441029	0.776429	823.981	0.269473	0.0188414	0.220505	135.491	0.151551	0.43683	0.964767	310.953	0.224417	0.251031	0.496979	44.9121	-1.84667	0.000524911	0.00733589	TRUE	0.1454	0.1983	0.9879	TRUE	-0.2161	0.03113	0.09163
ENSMUSG00000026172	Bcs1l	none	102.743	-0.170499	0.528711	0.82777	101.553	-0.236928	0.259761	0.725925	39.7793	-0.0584808	0.842583	0.994132	45.8117	0.129149	0.657653	0.831959	16.1246	-0.657993	0.389135	0.71202	TRUE	0.04734	0.7326	0.9999	TRUE	-0.1582	0.213	0.3855
ENSMUSG00000046598	Bdh1	none	384.4	0.48428	0.00310225	0.0678299	313.645	0.0174823	0.901385	0.982131	164.049	-0.0207591	0.905189	0.994132	275.115	0.0102684	0.947974	0.980674	10.3052	-0.918934	0.338799	0.670716	TRUE	-0.244	0.01536	0.445	TRUE	0.1611	0.09871	0.2201
ENSMUSG00000048482	Bdnf	none	413.334	-0.189707	0.242045	0.631734	595.219	0.435623	0.00204902	0.0545381	51.8698	-0.485324	0.0774478	0.703411	176.293	0.271687	0.132592	0.337353	NA	NA	NA	NA	TRUE	-0.1682	0.1261	0.9325	TRUE	0.106	0.3717	0.5615
ENSMUSG00000049658	Bdp1	none	145.28	-0.340232	0.155378	0.520515	144.232	0.265037	0.174876	0.637214	95.2183	-0.216494	0.294706	0.938729	95.9655	-0.656839	0.00273469	0.0198477	71.4017	-0.268615	0.502531	0.795951	TRUE	0.07956	0.4998	0.9999	TRUE	-0.07298	0.5861	0.746
ENSMUSG00000031872	Bean1	none	16.5669	-0.200359	0.762038	NA	8.04205	-0.694425	0.328912	NA	18.945	-0.485436	0.245646	0.913292	5.63857	-0.519385	0.489102	0.718652	NA	NA	NA	NA	TRUE	-0.02439	0.9047	0.9999	TRUE	-0.7029	0.001127	0.005799
ENSMUSG00000035086	Becn1	none	315.476	0.00949331	0.957292	0.99082	301.559	-0.0152327	0.914578	0.984076	126.246	0.194258	0.305784	0.939405	155.478	0.426959	0.0239142	0.105959	103.606	0.0225956	0.948177	0.987513	TRUE	-0.07989	0.3784	0.9999	TRUE	-0.06309	0.4525	0.6367
ENSMUSG00000040867	Begain	none	142.399	0.188973	0.430646	0.769718	113.357	-0.252207	0.22702	0.696161	32.6666	-0.1493	0.673173	0.991399	53.5931	0.129929	0.668545	0.838383	11.4606	-3.03408	0.0042347	0.0384999	TRUE	-0.1432	0.2328	0.9954	TRUE	-0.2434	0.04739	0.1276
ENSMUSG00000038214	Bend3	none	23.5084	-0.860107	0.117389	NA	14.4276	0.139149	0.797531	0.965216	5.07497	0.539665	0.496633	0.977337	9.89269	1.20844	0.0436843	0.162237	6.70195	-0.0889179	0.940587	0.986524	TRUE	-0.2084	0.216	0.9954	TRUE	-0.04314	0.7884	0.8824
ENSMUSG00000092060	Bend4	none	13.1444	-0.242414	0.737079	NA	15.875	0.281345	0.581282	0.908058	10.769	0.529502	0.336374	0.948922	8.19043	0.554833	0.366728	0.613593	NA	NA	NA	NA	TRUE	0.139	0.4346	0.9999	TRUE	-0.5313	0.0001545	0.001006
ENSMUSG00000028545	Bend5	none	78.0378	-0.261734	0.408244	NA	55.3671	0.139561	0.612473	0.917849	10.6969	0.299009	0.595449	0.988368	22.4086	0.133181	0.735084	0.878365	6.60762	0.0653623	0.956655	0.989274	TRUE	-0.1583	0.5018	0.9999	TRUE	-0.0338	0.8886	0.9421
ENSMUSG00000042182	Bend6	none	208.56	-0.39025	0.0682583	0.364952	120.966	-0.918257	1.57716e-05	0.00144791	390.928	-0.526564	0.00128666	0.142687	113.889	-0.0626492	0.778904	0.901733	58.2758	-0.79571	0.0718462	0.282619	TRUE	-0.05985	0.6289	0.9999	TRUE	-0.559	3.267e-07	3.518e-06
ENSMUSG00000048186	Bend7	none	10.607	0.257307	0.751568	NA	NA	NA	NA	NA	6.18668	0.545686	0.445848	0.9661	9.82433	0.551764	0.339679	0.589214	NA	NA	NA	NA	TRUE	-0.1626	0.6	0.9999	TRUE	0.3613	0.1683	0.3252
ENSMUSG00000037418	Best1	none	6.76682	-1.50407	0.145626	NA	6.82649	-0.150151	0.844706	NA	NA	NA	NA	NA	4.58833	0.0366673	0.963436	0.985452	NA	NA	NA	NA	TRUE	0.1268	0.7356	0.9999	TRUE	0.03901	0.8997	0.949
ENSMUSG00000032757	Bet1	none	84.0855	-0.329865	0.272648	NA	118.564	0.2099	0.305985	0.761307	113.436	-0.0915368	0.681173	0.991399	390.244	0.180535	0.250144	0.495773	89.4517	0.155959	0.673043	0.886608	TRUE	0.1381	0.3575	0.9999	TRUE	0.2889	0.03212	0.09392
ENSMUSG00000025484	Bet1l	none	11.1315	0.842878	0.291015	NA	5.60565	1.06241	0.209494	NA	8.19317	0.67989	0.269571	0.923706	5.23982	0.23911	0.757869	0.891141	NA	NA	NA	NA	TRUE	0.04112	0.7421	0.9999	TRUE	-0.05324	0.6462	0.7891
ENSMUSG00000050071	Bex1	none	167.996	-0.135051	0.558264	0.841914	135.12	-0.0617687	0.753478	0.953744	122.36	-0.0981724	0.600132	0.988481	71.6854	-0.187373	0.466369	0.702309	NA	NA	NA	NA	TRUE	-0.01095	0.9397	0.9999	TRUE	-0.4248	0.002	0.009508
ENSMUSG00000042750	Bex2	none	1072.21	0.185726	0.158063	0.524088	1133.73	0.116793	0.278948	0.744662	664.268	-0.23956	0.0775371	0.703411	378.409	0.0655102	0.708742	0.861577	29.8493	0.211472	0.715466	0.90511	TRUE	-0.1191	0.1608	0.9673	TRUE	-0.1873	0.04781	0.1284
ENSMUSG00000046432	Bex3	none	745.382	0.104491	0.464251	0.790385	620.079	0.049984	0.680597	0.935363	500.767	-0.149006	0.285621	0.932376	409.97	0.206392	0.193437	0.425175	60.7224	0.266933	0.540134	0.818128	NA	NA	NA	NA	NA	NA	NA	NA
ENSMUSG00000047844	Bex4	none	28.942	0.606011	0.227249	NA	22.9737	-0.530651	0.2289	0.6985	17.606	-0.376791	0.383645	0.957654	18.2743	-0.41045	0.342221	0.591829	NA	NA	NA	NA	TRUE	-0.01084	0.9562	0.9999	TRUE	-0.5895	0.001647	0.008049
ENSMUSG00000022684	Bfar	none	132.794	-0.21455	0.383969	0.740731	120.833	-0.139897	0.480875	0.868509	169.269	-0.17264	0.326038	0.943961	173.918	-0.426297	0.0207024	0.095523	52.4118	0.1579	0.73053	0.909979	TRUE	0.1348	0.2035	0.9921	TRUE	-0.1129	0.326	0.516
ENSMUSG00000031375	Bgn	none	22.5844	0.231723	0.67404	NA	4.01619	0.982679	0.361231	NA	7.32387	0.584615	0.380499	0.957654	144.201	0.216967	0.333305	0.583582	7.48042	-1.13856	0.297822	0.631514	TRUE	-0.113	0.4249	0.9999	TRUE	0.662	5.991e-07	6.178e-06
ENSMUSG00000044243	Bhlha9	none	4.66647	-0.240354	0.840856	NA	4.63886	-0.276051	0.774578	NA	NA	NA	NA	NA	NA	NA	NA	NA	NA	NA	NA	NA	TRUE	-0.876	0.01829	0.4803	TRUE	-0.2759	0.4098	0.5982
ENSMUSG00000072964	Bhlhb9	none	597.129	-0.421044	0.00372033	0.076531	755.592	0.0991573	0.371097	0.81214	258.247	0.12755	0.413086	0.958839	287.821	-0.227855	0.146976	0.359902	48.584	-0.261464	0.580311	0.835189	TRUE	0.1959	0.07846	0.8361	TRUE	-0.2475	0.0132	0.04602
ENSMUSG00000025128	Bhlhe22	none	84.9706	0.298611	0.315823	NA	117.794	-0.253567	0.264842	0.730525	80.3573	0.433692	0.0519817	0.616875	31.6155	0.0308329	0.93229	0.97452	4.90461	-2.89973	0.0606429	0.252287	TRUE	0.05321	0.6803	0.9999	TRUE	-0.5168	0.0005952	0.003319
ENSMUSG00000030103	Bhlhe40	none	900.198	0.613125	3.41224e-05	0.00335738	938.735	0.346315	0.00116019	0.0376299	244.074	0.516758	0.00311413	0.218908	439.451	0.086955	0.58621	0.787075	116.704	3.2793	7.5247e-14	7.86727e-12	TRUE	0.06994	0.463	0.9999	TRUE	-0.08458	0.4951	0.6737
ENSMUSG00000030256	Bhlhe41	none	150.016	0.431975	0.0935708	0.420018	241.23	0.397668	0.0301702	0.280544	170.979	0.149723	0.387251	0.957654	386.704	0.519519	0.00127042	0.0106435	387.354	1.13841	3.26915e-05	0.000689646	TRUE	-0.1721	0.3376	0.9999	TRUE	0.976	4.641e-12	8.553e-11
ENSMUSG00000014329	Bicc1	none	7.4175	-0.148538	0.879783	NA	NA	NA	NA	NA	4.84744	-0.44113	0.597514	0.988481	25.0172	1.27357	0.000867372	0.00774397	3.02745	-2.60148	0.163074	0.467455	TRUE	0.09046	0.7427	0.9999	TRUE	0.7844	0.0001748	0.001124
ENSMUSG00000003452	Bicd1	none	324.601	-0.272862	0.119374	0.474038	317.549	0.154657	0.280832	0.746566	292.394	0.0224263	0.882347	0.994132	233.462	0.124785	0.483574	0.714531	21.7163	-2.08712	0.00431607	0.0389156	TRUE	0.3028	0.06934	0.8153	TRUE	0.08741	0.6453	0.7885
ENSMUSG00000037933	Bicd2	none	227.149	-0.00908168	0.963891	0.992585	208.046	0.251257	0.120857	0.552715	143.617	0.120447	0.524002	0.977956	189.506	0.377874	0.0358656	0.142623	163.604	0.224652	0.50455	0.797072	TRUE	0.2448	0.005185	0.256	TRUE	-0.1269	0.1307	0.2707
ENSMUSG00000041609	Bicdl1	none	49.1958	0.74374	0.0739384	NA	26.935	-0.0311728	0.93608	0.988602	30.8655	-0.26232	0.426906	0.962425	37.3334	0.456969	0.134111	0.339464	11.0623	-0.940067	0.311854	0.645675	NA	NA	NA	NA	NA	NA	NA	NA
ENSMUSG00000070808	Bicra	none	76.3583	0.167623	0.591244	NA	55.4104	0.14947	0.597671	0.912561	69.3129	-0.354118	0.129325	0.802139	102.19	0.132491	0.533886	0.750905	55.4973	-0.412679	0.366224	0.695995	NA	NA	NA	NA	NA	NA	NA	NA
ENSMUSG00000036568	Bicral	none	206.071	0.128702	0.540438	0.831415	157.977	0.194294	0.287238	0.748713	131.841	0.0882812	0.628465	0.991361	113.406	-0.25226	0.235797	0.477826	65.2024	-0.404736	0.339959	0.67157	NA	NA	NA	NA	NA	NA	NA	NA
ENSMUSG00000004446	Bid	none	69.0761	0.148143	0.649362	NA	89.8731	0.255936	0.256208	0.723763	47.9476	0.373773	0.170307	0.852284	32.4569	0.892938	0.00953659	0.0539399	65.9478	-0.481708	0.239139	0.568128	TRUE	0.1102	0.5471	0.9999	TRUE	0.1597	0.2659	0.4491
ENSMUSG00000024381	Bin1	none	1144.29	0.117293	0.330646	0.702256	1112.41	0.0529489	0.605547	0.915692	570.913	0.0656428	0.664647	0.991361	312.386	0.232016	0.158178	0.377454	1016.12	-0.774252	0.000780942	0.0101727	TRUE	0.002852	0.9778	0.9999	TRUE	-0.04269	0.6929	0.8217
ENSMUSG00000098112	Bin2	none	8.68212	0.838664	0.358922	NA	NA	NA	NA	NA	NA	NA	NA	NA	NA	NA	NA	NA	698.771	-1.14837	7.88417e-06	0.000196593	NA	NA	NA	NA	NA	NA	NA	NA
ENSMUSG00000022089	Bin3	none	42.4463	0.278638	0.503737	NA	37.3109	-0.0901514	0.788304	0.962436	20.8703	-0.0932304	0.821724	0.994132	34.6325	1.27124	0.000284711	0.00299965	77.5424	0.987229	0.0135506	0.0894462	TRUE	-0.2045	0.2012	0.9897	TRUE	0.471	0.001104	0.005691
ENSMUSG00000057367	Birc2	none	220.068	-0.168826	0.41896	0.762387	192.379	0.176747	0.303347	0.759062	168.151	0.182607	0.306436	0.939405	111.823	0.194017	0.343794	0.59238	43.1409	0.623288	0.248718	0.579469	TRUE	0.1821	0.09736	0.8834	TRUE	0.0401	0.7184	0.8394
ENSMUSG00000032000	Birc3	none	NA	NA	NA	NA	NA	NA	NA	NA	NA	NA	NA	NA	11.0176	1.16765	0.044428	0.16389	38.4097	1.21253	0.0273112	0.147029	TRUE	0.1043	0.7315	0.9999	TRUE	1.384	3.62e-10	5.496e-09
ENSMUSG00000024073	Birc6	none	1908.42	0.0901569	0.527015	0.826604	2099.9	0.283737	0.0145579	0.190236	1687.57	-0.0172219	0.882207	0.994132	1054.19	-0.265392	0.0558354	0.190285	419.49	-0.463122	0.0618235	0.255288	TRUE	0.05737	0.5551	0.9999	TRUE	-0.1362	0.204	0.3739
ENSMUSG00000041684	Bivm	none	171.53	-0.297438	0.182973	0.561263	219.187	0.192317	0.288738	0.750521	216.574	0.0325139	0.845426	0.994132	137.574	-0.00300572	0.988732	0.994725	36.5828	-0.0737904	0.895842	0.97384	TRUE	-0.1477	0.2794	0.9999	TRUE	0.05298	0.6465	0.7892
ENSMUSG00000067787	Blcap	none	130.325	-0.129942	0.59508	0.859005	212.598	-0.274429	0.0986261	0.509147	134.289	0.182436	0.324953	0.943961	124.046	-0.210343	0.320991	0.57081	15.3771	0.212103	0.78556	0.930512	TRUE	0.04663	0.6306	0.9999	TRUE	-0.1693	0.06733	0.1655
ENSMUSG00000030528	Blm	none	43.274	-0.143054	0.728371	NA	34.5045	0.297802	0.394253	0.827037	56.4019	0.331741	0.219961	0.896286	13.5697	0.301035	0.539529	0.754887	17.3239	0.533144	0.512024	0.800895	TRUE	-0.4428	0.1177	0.9172	TRUE	0.1876	0.4283	0.6144
ENSMUSG00000020840	Blmh	none	433.574	0.0378748	0.816041	0.951524	384.955	0.0320965	0.818162	0.96924	315.329	0.221716	0.134163	0.811349	150.81	-0.440862	0.0224806	0.101264	113.275	-0.342286	0.306378	0.640702	TRUE	-0.1125	0.2872	0.9999	TRUE	0.03461	0.7701	0.8714
ENSMUSG00000061132	Blnk	none	66.3729	-0.167117	0.646703	NA	47.0941	1.84541	6.17201e-08	1.31101e-05	2.34881	2.75588	0.0702399	0.681019	8.46373	0.441404	0.480413	0.712707	396.97	0.723499	0.00268459	0.0269794	TRUE	0.08015	0.744	0.9999	TRUE	1.742	4.145e-19	1.232e-17
ENSMUSG00000090247	Bloc1s1	none	15.0018	0.288498	0.674895	NA	7.0873	-0.625721	0.391261	NA	14.0038	0.49576	0.313215	0.939405	69.1189	0.281478	0.282903	0.532814	28.1227	-0.351461	0.559865	0.827303	TRUE	0.1628	0.2635	0.9999	TRUE	0.3549	0.001737	0.008414
ENSMUSG00000057506	Bloc1s2	none	4.17079	2.12491	0.142377	NA	NA	NA	NA	NA	NA	NA	NA	NA	NA	NA	NA	NA	NA	NA	NA	NA	TRUE	0.1645	0.2966	0.9999	TRUE	-0.02589	0.862	0.928
ENSMUSG00000057667	Bloc1s3	none	27.9892	0.346144	0.502106	NA	9.77134	-0.143748	0.839535	NA	15.1318	-0.0773078	0.870458	0.994132	16.1042	0.0439506	0.921229	0.970731	7.117	2.03722	0.119336	0.388105	TRUE	0.2066	0.341	0.9999	TRUE	0.09665	0.5883	0.7481
ENSMUSG00000060708	Bloc1s4	none	28.4089	0.0170911	0.973038	NA	25.6358	-0.275452	0.540532	0.89194	18.3882	0.258027	0.570434	0.983133	29.2441	0.32083	0.346178	0.594854	12.6697	0.623108	0.487584	0.786416	NA	NA	NA	NA	NA	NA	NA	NA
ENSMUSG00000038982	Bloc1s5	none	40.9394	0.0411818	0.921307	NA	39.9441	0.234225	0.466747	0.862086	66.3882	0.109957	0.653011	0.991361	111.146	-0.128074	0.552203	0.763101	37.1819	0.33686	0.532137	0.813772	NA	NA	NA	NA	NA	NA	NA	NA
ENSMUSG00000005804	Bloc1s6	none	158.131	-0.0659496	0.770133	0.937782	144.191	0.0678937	0.726311	0.948749	80.2013	0.450722	0.040186	0.565328	175.682	0.316991	0.0802793	0.244294	47.7376	1.08784	0.0255086	0.139467	NA	NA	NA	NA	NA	NA	NA	NA
ENSMUSG00000001999	Blvra	none	160.386	-0.295603	0.187609	0.566878	120.879	0.208954	0.354644	0.80137	147.3	0.0188233	0.921183	0.994789	60.3353	-0.0604782	0.809858	0.917103	108.031	0.552459	0.109253	0.36773	TRUE	-0.01567	0.9284	0.9999	TRUE	0.2582	0.08089	0.1903
ENSMUSG00000040466	Blvrb	none	58.6929	0.250718	0.478559	NA	32.8271	0.0585277	0.884878	0.980844	40.5259	0.202084	0.503515	0.977337	81.6958	0.338483	0.144732	0.356301	120.352	0.515878	0.149962	0.446069	TRUE	-0.1448	0.5901	0.9999	TRUE	0.7251	0.002178	0.01025
ENSMUSG00000026577	Blzf1	none	131.966	-0.372175	0.137788	0.496927	156.551	-0.00336116	0.986442	0.997252	168.764	-0.195515	0.253115	0.916617	131.898	-0.885734	1.55082e-05	0.000240647	32.0718	-0.470602	0.394855	0.715397	TRUE	-0.1096	0.413	0.9999	TRUE	0.05165	0.6699	0.8064
ENSMUSG00000044117	Bmerb1	none	1035.19	0.130605	0.299059	0.682437	764.215	0.0261016	0.819461	0.96924	481.345	0.0250683	0.853731	0.994132	546.872	0.878313	8.1692e-09	2.47084e-07	28.4199	-0.603346	0.32126	0.654435	NA	NA	NA	NA	NA	NA	NA	NA
ENSMUSG00000026739	Bmi1	none	87.3032	-0.0732329	0.806361	NA	129.274	0.128964	0.518069	0.881738	46.5108	-0.416717	0.169979	0.852284	116.217	-0.160279	0.433409	0.67375	70.7151	0.589259	0.17569	0.488317	TRUE	0.0931	0.4148	0.9999	TRUE	-0.01374	0.9007	0.9495
ENSMUSG00000022098	Bmp1	none	104.055	0.0195299	0.943651	0.987089	76.9586	-0.107493	0.676562	0.935363	44.0332	-0.383326	0.228117	0.902369	487.075	0.511696	0.00423534	0.0283468	28.385	-0.0794333	0.893729	0.97374	TRUE	-0.1451	0.1685	0.9748	TRUE	0.3961	5.264e-05	0.0003855
ENSMUSG00000027358	Bmp2	none	20.0189	-0.195991	0.748718	NA	14.1045	0.123502	0.811529	0.968456	14.7381	-0.330152	0.51365	0.977729	13.2379	-0.178873	0.756764	0.890487	NA	NA	NA	NA	TRUE	-0.4392	0.145	0.9492	TRUE	-0.003373	0.9906	0.9958
ENSMUSG00000034663	Bmp2k	none	22.0985	0.125964	0.820916	NA	17.9814	0.585452	0.219284	0.687955	34.7283	0.378747	0.240888	0.908037	163.645	0.53638	0.0035807	0.0247425	523.693	0.283514	0.216119	0.539944	TRUE	0.1451	0.3533	0.9999	TRUE	1.164	8.667e-24	3.461e-22
ENSMUSG00000029335	Bmp3	none	445.142	-0.218972	0.178578	0.556079	101.298	1.03941	0.000187743	0.0103766	5.74153	0.435911	0.552314	0.980439	252.01	-0.274073	0.201888	0.435107	9.70074	-1.10685	0.265509	0.597432	TRUE	-0.5316	0.1038	0.8944	TRUE	0.1205	0.7038	0.8294
ENSMUSG00000039004	Bmp6	none	8.56548	0.333739	0.70931	NA	NA	NA	NA	NA	4.33887	-0.535423	0.536913	0.979472	48.5466	0.262383	0.355026	0.602959	4.09126	-1.33959	0.373613	0.700393	TRUE	0.7261	0.05365	0.7403	TRUE	0.9636	2.05e-05	0.0001629
ENSMUSG00000008999	Bmp7	none	8.25419	-0.615355	0.494173	NA	2.70581	-0.403599	0.774576	NA	5.13836	-0.33341	0.666625	0.991361	61.8503	0.36154	0.183567	0.41172	NA	NA	NA	NA	TRUE	0.2111	0.4976	0.9999	TRUE	0.6542	0.008314	0.03168
ENSMUSG00000031963	Bmper	none	81.3144	-0.281377	0.364512	NA	45.0437	-0.599497	0.152242	0.601666	43.7171	-0.567847	0.0646916	0.665718	91.7761	-0.259115	0.2605	0.507576	NA	NA	NA	NA	TRUE	0.1605	0.5166	0.9999	TRUE	-0.1771	0.4113	0.5993
ENSMUSG00000021796	Bmpr1a	none	160.666	-0.0975668	0.668951	0.897505	202.583	-0.0698394	0.680162	0.935363	143.278	-0.161814	0.403214	0.957669	1424.97	-0.271134	0.0830801	0.250275	119.282	0.391799	0.269318	0.601525	TRUE	0.1101	0.2594	0.9999	TRUE	0.1406	0.1619	0.316
ENSMUSG00000052430	Bmpr1b	none	39.6368	0.955004	0.0264444	NA	8.27948	0.401945	0.56031	NA	10.6925	0.301794	0.576561	0.983338	976.337	0.034502	0.836048	0.928462	13.3176	-1.52042	0.154262	0.452718	TRUE	0.1848	0.1445	0.9492	TRUE	0.7068	2.739e-09	3.777e-08
ENSMUSG00000067336	Bmpr2	none	1400.45	-0.349621	0.0062244	0.104034	1601.01	0.00432372	0.965376	0.993322	1159.1	-0.230956	0.166374	0.846278	2285.01	-0.211123	0.108898	0.298107	532.824	0.00834496	0.97059	0.991725	TRUE	0.4829	0.0521	0.7348	TRUE	0.3298	0.284	0.4693
ENSMUSG00000030138	Bms1	none	189.92	-0.2312	0.27869	0.666747	149.922	0.139868	0.442835	0.854032	101.069	0.129393	0.53249	0.979195	63.5535	-0.486524	0.0544799	0.187366	70.9158	0.119252	0.766781	0.924502	TRUE	-0.075	0.4786	0.9999	TRUE	0.03508	0.747	0.8574
ENSMUSG00000042742	Bmt2	none	164.058	-0.250803	0.285961	0.671605	186.4	-0.107743	0.544481	0.895183	90.5864	-0.129773	0.585174	0.985685	124.34	-0.235727	0.23146	0.472558	68.1293	1.33155	0.00184801	0.0200395	NA	NA	NA	NA	NA	NA	NA	NA
ENSMUSG00000049086	Bmyc	none	229.367	0.216013	0.286166	0.671746	175.124	-0.172949	0.321464	0.772175	109.535	-0.0095128	0.96156	0.997183	144.961	-0.509973	0.00779998	0.0459565	92.6413	-0.0179518	0.962758	0.990867	TRUE	-0.1928	0.3528	0.9999	TRUE	-0.008132	0.9691	0.9857
ENSMUSG00000024191	Bnip1	none	174.407	-0.0273179	0.900695	0.975872	223.098	-0.0450716	0.786625	0.962013	123.647	-0.194386	0.321441	0.941917	98.1177	-0.15086	0.485435	0.715768	46.2738	0.118956	0.813803	0.942095	TRUE	-0.2214	0.1469	0.9492	TRUE	-0.1382	0.2997	0.4873
ENSMUSG00000011958	Bnip2	none	52.1008	0.0582448	0.874597	NA	61.8144	0.281872	0.309131	0.763718	44.3281	0.132353	0.660831	0.991361	163.709	0.552003	0.00474328	0.0312051	192.88	0.299446	0.294679	0.62764	TRUE	0.02481	0.8549	0.9999	TRUE	0.4801	8.11e-05	0.0005704
ENSMUSG00000078566	Bnip3	none	366.008	-0.118452	0.506287	0.812743	319.931	-0.222828	0.15664	0.609951	323.079	-0.130873	0.378935	0.957654	180.551	-0.256737	0.197751	0.430077	50.1826	0.686021	0.141446	0.429966	TRUE	-0.04484	0.6404	0.9999	TRUE	-0.2753	0.005903	0.02396
ENSMUSG00000022051	Bnip3l	none	185.646	0.236506	0.293355	0.678077	135.178	-0.167614	0.396341	0.827596	93.6014	-0.29097	0.18879	0.869839	207.333	0.342853	0.04659	0.169689	89.4922	0.412257	0.26668	0.598408	TRUE	0.04608	0.6001	0.9999	TRUE	0.01237	0.883	0.9394
ENSMUSG00000022687	Boc	none	246.415	0.064957	0.750324	0.929718	99.9827	-0.0309	0.885781	0.980844	262.33	-0.636333	9.06249e-05	0.0271116	550.95	-0.116624	0.44433	0.68229	12.5087	-1.43865	0.107189	0.36419	TRUE	0.0336	0.8432	0.9999	TRUE	0.5676	2.823e-07	3.061e-06
ENSMUSG00000044502	Bod1	none	146.518	0.1661	0.523842	0.825438	107.23	0.0992249	0.641283	0.927249	96.2865	-0.0630711	0.766559	0.994132	144.866	0.135499	0.495555	0.723517	15.1979	-0.379037	0.63536	0.865327	TRUE	0.0009225	0.9929	0.9999	TRUE	-0.207	0.03237	0.09446
ENSMUSG00000061755	Bod1l	none	711.558	-0.259083	0.0730786	0.375883	745.157	0.0156233	0.917544	0.984651	979.958	-0.377339	0.00389093	0.239051	684.994	-0.485165	0.00219454	0.0165763	413.836	-0.432677	0.0741204	0.287766	TRUE	0.2036	0.08278	0.8494	TRUE	-0.09038	0.3987	0.5869
ENSMUSG00000026278	Bok	none	106.369	0.496495	0.0673379	0.362821	72.9981	0.271021	0.344298	0.791716	9.23689	-0.114277	0.846553	0.994132	21.1322	-0.140894	0.727214	0.873513	NA	NA	NA	NA	TRUE	-0.016	0.9084	0.9999	TRUE	0.03214	0.825	0.9048
ENSMUSG00000015943	Bola1	none	49.9322	0.767202	0.0458657	NA	40.8759	-0.203679	0.519499	0.882577	47.9891	0.137369	0.642595	0.991361	51.9262	0.207686	0.461375	0.697215	25.776	0.00469826	0.993914	0.997705	TRUE	0.1012	0.754	0.9999	TRUE	0.3265	0.2824	0.4674
ENSMUSG00000047721	Bola2	none	78.0319	0.50727	0.122436	NA	46.1728	-0.0675499	0.818096	0.96924	92.9771	-0.173661	0.419886	0.960281	112.666	0.321202	0.136967	0.344553	64.7479	1.14357	0.0181653	0.109937	TRUE	-0.1369	0.5456	0.9999	TRUE	0.02382	0.9044	0.9515
ENSMUSG00000045160	Bola3	none	25.851	0.0185262	0.971356	NA	23.3085	-0.481182	0.284811	0.748092	58.0659	-0.566908	0.0383983	0.552732	112.237	-0.298689	0.161329	0.381313	15.199	0.857584	0.291934	0.625378	TRUE	-0.09063	0.6792	0.9999	TRUE	-0.146	0.453	0.6372
ENSMUSG00000022557	Bop1	none	341.682	0.188009	0.282771	0.669596	362.64	0.0780202	0.602325	0.914378	107.513	0.184583	0.362913	0.95627	91.971	-0.249939	0.300555	0.552217	36.7349	0.50834	0.338584	0.670585	TRUE	-0.1316	0.2956	0.9999	TRUE	-0.05831	0.6396	0.7845
ENSMUSG00000022070	Bora	none	6.16414	-0.426674	0.683932	NA	6.15911	-0.0875387	0.910822	NA	4.89865	0.148026	0.85295	0.994132	3.75143	1.04352	0.258219	0.505233	NA	NA	NA	NA	NA	NA	NA	NA	NA	NA	NA	NA
ENSMUSG00000042992	Borcs5	none	249.13	0.102857	0.586601	0.855177	243.481	-0.209497	0.160684	0.616851	160.753	-0.0182833	0.914177	0.994132	127.625	-0.220586	0.289989	0.541445	17.544	0.188939	0.797775	0.93453	NA	NA	NA	NA	NA	NA	NA	NA
ENSMUSG00000045176	Borcs6	none	42.0974	0.39692	0.360084	NA	32.1562	-0.419519	0.248299	0.714997	21.4674	0.235921	0.556963	0.980439	29.2991	0.135086	0.702	0.857126	15.3439	0.838134	0.297634	0.63134	NA	NA	NA	NA	NA	NA	NA	NA
ENSMUSG00000062376	Borcs7	none	125.541	0.138682	0.582557	0.853989	123.728	-0.119564	0.571277	0.904773	131.574	-0.156102	0.408294	0.958839	160.641	0.264146	0.19017	0.421106	68.9779	1.08766	0.0184112	0.110958	NA	NA	NA	NA	NA	NA	NA	NA
ENSMUSG00000002345	Borcs8	none	68.0255	0.516764	0.11608	NA	32.6928	-0.216696	0.54368	0.894817	42.7932	0.49261	0.125417	0.796011	79.8483	0.259528	0.287924	0.539423	25.344	0.479995	0.44271	0.754818	NA	NA	NA	NA	NA	NA	NA	NA
ENSMUSG00000038871	Bpgm	none	157.953	0.0516915	0.821533	0.95345	148.699	-0.430612	0.0529994	0.381744	89.5195	0.0568544	0.793064	0.994132	389.846	0.319127	0.0532801	0.184934	28.057	-0.515222	0.380156	0.704878	TRUE	-0.0288	0.7778	0.9999	TRUE	0.0837	0.3793	0.5684
ENSMUSG00000038286	Bphl	none	149.786	0.173252	0.467539	0.792318	203.105	-0.09629	0.564825	0.902869	107.105	-0.0331824	0.865211	0.994132	180.587	0.0913184	0.597284	0.793858	48.4745	0.204797	0.661573	0.880068	TRUE	0.0881	0.5067	0.9999	TRUE	0.1097	0.3636	0.5534
ENSMUSG00000026617	Bpnt1	none	311.164	0.322629	0.0832306	0.397188	329.12	0.0331548	0.818401	0.96924	206.577	0.0321221	0.84446	0.994132	192.755	-0.115142	0.503388	0.728369	68.394	-0.322516	0.42724	0.74394	TRUE	0.1373	0.1383	0.9424	TRUE	-0.1752	0.06216	0.1559
ENSMUSG00000040481	Bptf	none	618.17	0.0786121	0.608067	0.864598	846.511	0.340804	0.0165337	0.204132	405.7	-0.246248	0.107503	0.768394	354.097	-0.293128	0.0841625	0.252735	267.29	-0.316922	0.23546	0.56377	TRUE	0.03272	0.7443	0.9999	TRUE	-0.1354	0.1715	0.3297
ENSMUSG00000002413	Braf	none	849.606	-0.0787902	0.540149	0.831415	1066.45	0.0113599	0.920935	0.984722	535.013	0.0184085	0.89177	0.994132	365.402	0.128061	0.419925	0.660881	84.4301	-0.0678204	0.871708	0.964934	TRUE	0.001126	0.9904	0.9999	TRUE	-0.08603	0.3865	0.5749
ENSMUSG00000029458	Brap	none	354.259	0.17361	0.320276	0.695168	288.382	-0.087007	0.581315	0.908058	168.639	-0.198279	0.258396	0.918876	143.957	-0.0349128	0.851896	0.937459	93.5727	0.134118	0.717808	0.905892	TRUE	0.04391	0.635	0.9999	TRUE	-0.03895	0.6581	0.7977
ENSMUSG00000000148	Brat1	none	53.1106	0.200103	0.59519	NA	45.7646	0.455547	0.139673	0.581953	32.5003	0.495422	0.148647	0.830808	53.9998	0.265846	0.310884	0.56159	29.5706	0.457117	0.440572	0.754155	NA	NA	NA	NA	NA	NA	NA	NA
ENSMUSG00000017146	Brca1	none	9.07128	-0.308683	0.736175	NA	NA	NA	NA	NA	8.54001	-1.25559	0.0459784	0.590285	9.95213	1.0303	0.0752639	0.234089	NA	NA	NA	NA	TRUE	0.1488	0.6483	0.9999	TRUE	0.8586	0.005863	0.02383
ENSMUSG00000041147	Brca2	none	21.5541	-0.184311	0.748647	NA	24.2547	0.347403	0.494884	0.875173	32.1553	0.319386	0.342322	0.950864	20.1215	0.58884	0.144631	0.356177	23.3642	-0.392849	0.543022	0.819587	TRUE	-0.3109	0.2352	0.9954	TRUE	0.5067	0.02609	0.07989
ENSMUSG00000031201	Brcc3	none	236.887	-0.0425998	0.83062	0.954345	372.723	-0.0151663	0.915401	0.984076	208.621	0.00531857	0.973593	0.997323	128.44	-0.0568877	0.773398	0.899131	55.6268	0.0853291	0.853143	0.958288	TRUE	0.04033	0.7222	0.9999	TRUE	-0.1219	0.2897	0.4751
ENSMUSG00000022387	Brd1	none	269.576	-0.120963	0.512728	0.817285	256.075	0.282566	0.0552569	0.390985	96.8153	0.00899721	0.966384	0.997183	97.9976	-0.131611	0.533126	0.750582	84.1544	-0.0634691	0.872614	0.965471	TRUE	-0.09677	0.336	0.9999	TRUE	-0.08969	0.3361	0.5258
ENSMUSG00000024335	Brd2	none	500.988	-0.0925821	0.555499	0.84021	599.138	-0.0726224	0.531482	0.89002	240.927	0.150592	0.360185	0.953378	250.819	-0.0775659	0.655056	0.831252	180.126	0.256264	0.377415	0.703096	TRUE	-0.1632	0.07252	0.818	TRUE	0.09668	0.3176	0.5075
ENSMUSG00000026918	Brd3	none	217.543	-0.167485	0.399871	0.751525	197.53	-0.0540861	0.75608	0.954733	133.265	-0.170313	0.353026	0.9512	157.223	-0.203476	0.296833	0.548201	51.8665	0.69119	0.133373	0.414568	TRUE	-0.02341	0.8042	0.9999	TRUE	-0.08186	0.3901	0.5788
ENSMUSG00000109946	Brd3os	none	99.3892	-0.365143	0.185309	0.564092	80.2484	0.13954	0.556192	0.899293	53.4393	-0.0853173	0.761904	0.994132	45.1437	0.0792839	0.79064	0.906819	NA	NA	NA	NA	NA	NA	NA	NA	NA	NA	NA	NA
ENSMUSG00000024002	Brd4	none	488.246	-0.294685	0.048297	0.314134	549.574	-0.179172	0.194833	0.663231	306.597	-0.135058	0.373313	0.956487	150.535	-0.389317	0.049054	0.175739	157.182	-0.0593189	0.846827	0.95617	TRUE	0.0668	0.4868	0.9999	TRUE	-0.1003	0.2468	0.4262
ENSMUSG00000031660	Brd7	none	186.704	-0.282604	0.186931	0.566333	166.168	-0.0539014	0.784348	0.961577	92.8659	-0.108618	0.604129	0.989251	146.695	0.0221714	0.909233	0.965717	91.4743	0.0765283	0.833758	0.951513	TRUE	0.04688	0.645	0.9999	TRUE	-0.00561	0.9596	0.9811
ENSMUSG00000003778	Brd8	none	468.431	0.074842	0.664763	0.895856	420.844	0.128866	0.339567	0.788037	549.322	-0.178257	0.207651	0.887528	302.999	-0.156178	0.322991	0.572797	139.791	-0.705871	0.0262454	0.142384	TRUE	-0.04898	0.6059	0.9999	TRUE	-0.05076	0.5856	0.746
ENSMUSG00000057649	Brd9	none	241.981	-0.2252	0.260364	0.650695	289.334	-0.318602	0.0273781	0.268495	86.6302	-0.0381584	0.860924	0.994132	115.737	0.0608877	0.765491	0.895112	30.8832	-0.157598	0.787746	0.931085	TRUE	-0.01331	0.8888	0.9999	TRUE	-0.5158	1.094e-07	1.25e-06
ENSMUSG00000029279	Brdt	none	118.969	-0.97192	0.000267534	0.0131927	180.085	0.590398	0.00971406	0.152821	48.8874	0.183986	0.533942	0.979472	132.006	0.503147	0.0148562	0.0743383	7.09	-0.375929	0.770988	0.926259	TRUE	0.02841	0.8457	0.9999	TRUE	0.09831	0.4764	0.6579
ENSMUSG00000011158	Brf1	none	193.376	-0.172853	0.421116	0.764096	217.956	-0.0836884	0.618392	0.91945	68.1101	0.192629	0.441156	0.964767	164.951	0.160613	0.375544	0.621668	67.2064	-0.0423956	0.920055	0.980807	TRUE	-0.08735	0.3954	0.9999	TRUE	0.1146	0.2434	0.4224
ENSMUSG00000031487	Brf2	none	78.332	0.237272	0.451096	NA	75.4529	0.0463332	0.860782	0.976808	22.2677	0.128674	0.741183	0.994132	34.8472	0.0886904	0.783963	0.903516	10.3355	0.0443736	0.962911	0.990867	TRUE	-0.2377	0.1796	0.9878	TRUE	-0.05149	0.7321	0.8476
ENSMUSG00000047843	Bri3	none	61.8998	0.393301	0.284687	NA	47.0045	0.229423	0.449125	0.856321	33.408	0.00830577	0.979246	0.997323	80.8119	0.410072	0.0697506	0.221477	142.62	0.866799	0.0111553	0.0775731	TRUE	-0.04209	0.8069	0.9999	TRUE	0.4936	0.000603	0.003357
ENSMUSG00000037905	Bri3bp	none	314.995	0.0110573	0.951826	0.989836	250.525	-0.435866	0.00317677	0.0715467	356.165	-0.376039	0.0161497	0.425716	285.682	-0.422085	0.0307979	0.127256	43.0106	0.466046	0.354968	0.686353	TRUE	-0.0007246	0.9938	0.9999	TRUE	-0.4554	5.063e-07	5.274e-06
ENSMUSG00000028351	Brinp1	none	1529.77	-0.0424009	0.724179	0.918333	1676.84	0.0799737	0.471487	0.864283	333.693	-0.0697353	0.616685	0.98964	372.949	-0.191128	0.334594	0.58423	49.474	-1.56078	0.00151947	0.0173639	NA	NA	NA	NA	NA	NA	NA	NA
ENSMUSG00000004031	Brinp2	none	531.318	0.185149	0.218926	0.606812	236.21	-0.262944	0.116936	0.547711	143.407	0.161828	0.38107	0.957654	209.711	0.0789021	0.690012	0.850697	16.7219	-1.80112	0.0313609	0.162659	NA	NA	NA	NA	NA	NA	NA	NA
ENSMUSG00000035131	Brinp3	none	234.174	-0.0642108	0.745674	0.927672	64.6963	-0.597427	0.0329099	0.296667	81.4211	-0.0490292	0.855934	0.994132	341.926	0.313569	0.0494547	0.17646	11.6639	-1.33932	0.184301	0.500157	NA	NA	NA	NA	NA	NA	NA	NA
ENSMUSG00000085208	Brip1os	none	36.4379	0.323875	0.469447	NA	22.3471	-0.383062	0.362964	0.806321	180.975	-0.117101	0.549148	0.980439	233.835	0.457882	0.0267101	0.114577	163.282	0.223298	0.470175	0.774055	NA	NA	NA	NA	NA	NA	NA	NA
ENSMUSG00000022247	Brix1	none	240.764	-0.397563	0.0506279	0.321442	243.224	0.0901811	0.551999	0.898155	134.502	-0.047213	0.802759	0.994132	149.711	0.0216813	0.912758	0.966851	69.8559	0.268053	0.506419	0.797675	TRUE	0.09035	0.5278	0.9999	TRUE	-0.05988	0.6567	0.7968
ENSMUSG00000033940	Brk1	none	709.166	-0.367393	0.00891562	0.127868	761.321	0.0752491	0.648115	0.928929	272.22	0.0498283	0.765121	0.994132	764.097	0.110521	0.44011	0.679685	541.662	0.0828967	0.713997	0.90511	NA	NA	NA	NA	NA	NA	NA	NA
ENSMUSG00000080268	Brms1	none	101.519	-0.171591	0.53436	0.829649	76.6848	0.166881	0.491323	0.874378	19.8865	0.225385	0.578024	0.983338	49.9018	0.063894	0.819173	0.921772	52.5349	0.339647	0.455319	0.763666	TRUE	0.03859	0.786	0.9999	TRUE	0.1707	0.1726	0.3311
ENSMUSG00000012076	Brms1l	none	341.013	-0.175701	0.295358	0.679176	334.801	-0.105775	0.452805	0.856869	247.812	-0.193709	0.228464	0.902699	137.108	-0.0836805	0.674619	0.841968	35.1065	0.074551	0.893275	0.973735	TRUE	0.003416	0.9716	0.9999	TRUE	-0.3224	0.001027	0.005351
ENSMUSG00000046836	Brox	none	73.5289	0.262997	0.406623	NA	97.1557	-0.122858	0.58551	0.908342	85.6654	-0.00459166	0.984447	0.997323	59.2451	-0.0672709	0.795828	0.910282	43.3834	0.445218	0.366513	0.695995	TRUE	-0.003873	0.9686	0.9999	TRUE	0.2378	0.01284	0.04505
ENSMUSG00000001632	Brpf1	none	145.852	-0.0678763	0.771991	0.938057	158.656	0.166235	0.379423	0.817017	69.0149	-0.0915678	0.704107	0.992723	27.649	-0.3687	0.31431	0.564901	45.0656	-0.207032	0.676292	0.88843	TRUE	-0.06159	0.539	0.9999	TRUE	-0.004815	0.9627	0.9826
ENSMUSG00000063952	Brpf3	none	153.214	0.140348	0.557791	0.841914	119.533	-0.0247725	0.902777	0.982151	28.1374	-0.0472278	0.901084	0.994132	42.7549	-0.170665	0.587057	0.787577	14.5531	-0.0938953	0.907589	0.978072	TRUE	-0.0579	0.5893	0.9999	TRUE	-0.08804	0.3775	0.5668
ENSMUSG00000035390	Brsk1	none	500.488	0.51586	0.0012772	0.038779	352.359	-0.00558169	0.967708	0.993322	247.829	0.231217	0.16455	0.845874	117.475	0.0981314	0.62871	0.81584	24.1585	-2.42252	0.000705104	0.0093901	TRUE	-0.1628	0.1595	0.9659	TRUE	-0.2761	0.01636	0.05481
ENSMUSG00000053046	Brsk2	none	740.308	0.0888119	0.523116	0.825405	469.354	0.00791643	0.951884	0.991618	307.108	0.0712577	0.633944	0.991361	110.718	0.049912	0.824414	0.923289	31.8896	-2.56443	0.0001676	0.00283351	TRUE	-0.1263	0.2116	0.9954	TRUE	-0.2028	0.03739	0.1063
ENSMUSG00000022914	Brwd1	none	352.336	-0.109137	0.525083	0.825996	447.956	0.0838036	0.51871	0.881995	190.351	-0.107503	0.534092	0.979472	165.823	-0.339698	0.0657967	0.213177	93.6257	-0.97185	0.00682041	0.0548902	TRUE	0.03233	0.7277	0.9999	TRUE	-0.3288	0.002179	0.01025
ENSMUSG00000063663	Brwd3	none	36.983	0.139168	0.748629	NA	51.6621	1.11764	0.000335792	0.0160248	25.4344	-0.265603	0.471432	0.972154	37.1518	-0.311604	0.339369	0.588998	45.5572	0.684925	0.161658	0.464962	TRUE	0.5842	0.04868	0.7189	TRUE	0.193	0.4287	0.6149
ENSMUSG00000071657	Bscl2	none	651.6	0.114884	0.413974	0.76026	428.107	-0.111745	0.421234	0.84102	356.688	0.106379	0.459926	0.970076	357.788	-0.0108156	0.945569	0.97996	123.124	0.172525	0.612254	0.852367	TRUE	0.07653	0.4826	0.9999	TRUE	0.07239	0.5157	0.6907
ENSMUSG00000040859	Bsdc1	none	260.721	0.343069	0.0921176	0.417163	191.19	0.211821	0.278502	0.74461	138.491	0.169868	0.358794	0.953003	297.782	0.167578	0.316401	0.566798	91.1233	-0.0135854	0.97077	0.991725	TRUE	-0.1094	0.2593	0.9999	TRUE	0.1256	0.1776	0.338
ENSMUSG00000023175	Bsg	none	3688.71	0.00218545	0.985659	0.998239	2975.08	-0.231583	0.0230927	0.245982	6310.34	-0.412451	0.00276943	0.201277	7633.07	-0.321174	0.0143093	0.0725052	2740.45	0.431864	0.026431	0.143326	TRUE	0.2204	0.09765	0.8845	TRUE	-0.2769	0.01202	0.04283
ENSMUSG00000032589	Bsn	none	3474.11	0.308783	0.00427586	0.0825896	2072.84	0.267934	0.0127397	0.176586	991.501	-0.239962	0.0775107	0.703411	867.974	-0.258586	0.12805	0.329871	112.45	-1.80912	1.07643e-06	3.49592e-05	TRUE	-0.03887	0.7889	0.9999	TRUE	-0.1883	0.1808	0.3425
ENSMUSG00000046718	Bst2	none	17.7045	3.23471	8.60556e-05	NA	21.3102	1.76535	0.000242525	0.0125108	4.74917	1.71561	0.0481546	0.59843	275.766	1.85562	3.42919e-15	2.11927e-13	504.683	1.26799	8.56313e-08	3.5938e-06	TRUE	0.1489	0.6927	0.9999	TRUE	3.127	1.049e-40	8.933e-39
ENSMUSG00000040565	Btaf1	none	411.149	-0.808772	0.0712731	0.371611	430.704	-0.0771043	0.696417	0.941153	209.281	0.248068	0.207847	0.887528	371.61	-0.300507	0.10918	0.298594	180.48	0.639116	0.03537	0.176118	TRUE	0.02945	0.7795	0.9999	TRUE	-0.2017	0.2014	0.3704
ENSMUSG00000025103	Btbd1	none	124.103	0.0175302	0.944215	0.987089	135.829	0.384704	0.0710752	0.444035	63.9318	0.362061	0.167033	0.846717	268.959	0.240172	0.137394	0.345283	31.2075	-0.892212	0.116235	0.383346	TRUE	-0.002121	0.9826	0.9999	TRUE	-0.001817	0.9839	0.992
ENSMUSG00000038187	Btbd10	none	1016.4	-0.154734	0.236142	0.625643	669.609	-0.0144631	0.899727	0.982131	285.399	0.109247	0.492504	0.975974	164.758	-0.0172946	0.930864	0.974125	36.4635	-0.582456	0.278428	0.610034	TRUE	-0.1818	0.07229	0.8179	TRUE	-0.2946	0.004043	0.01743
ENSMUSG00000020042	Btbd11	none	37.314	0.146371	0.736793	NA	5.59328	-1.05833	0.236293	NA	297.763	0.151402	0.336641	0.948922	25.3679	-0.330266	0.406284	0.649073	8.04274	-1.9885	0.0755038	0.291239	TRUE	-0.1136	0.5251	0.9999	TRUE	-0.5149	0.005362	0.02213
ENSMUSG00000000202	Btbd17	none	8.15636	0.0118382	0.98982	NA	4.06451	0.410348	0.685374	NA	4.51241	-0.375746	0.656616	0.991361	773.283	-1.84014	2.93454e-25	3.52046e-23	NA	NA	NA	NA	TRUE	0.02926	0.9114	0.9999	TRUE	-0.6097	0.008609	0.03257
ENSMUSG00000073771	Btbd19	none	13.154	-0.418488	0.558904	NA	12.3025	0.369686	0.507869	0.879998	NA	NA	NA	NA	4.45826	1.19632	0.182401	0.410137	13.0754	0.416031	0.639718	0.868364	TRUE	-0.1669	0.4899	0.9999	TRUE	-0.141	0.4613	0.6452
ENSMUSG00000003344	Btbd2	none	255.458	0.277705	0.137113	0.496927	201.556	-0.053819	0.775274	0.959607	167.576	0.259358	0.159586	0.84254	114.851	0.000579007	0.997683	0.998872	38.6593	-0.478	0.352067	0.683992	TRUE	-0.03258	0.8087	0.9999	TRUE	0.04979	0.6899	0.8198
[truncated: 14,884 more rows]
